# Supplementary material for: Trans-genetic effects of circular RNA expression quantitative trait loci and potential causal mechanisms in autism
Source: Research Square preprint supplement (doi:10.21203/rs.3.rs-155043/v1), 2021-02-05
Supplement: Supplementary file 1 [file bf07ecfb8eec0cb35e383533.xlsx]

## Sheet: Used samples
BrainID	RegionID	ASD.CTL	Age	Sex	RIN	SeqBatch	BrainBank	PMI	Detailed_Diagnosis	with genotyping data? (Y: yes)	with small RNA-seq data? (Y: yes)
AN08873	ba41-42-22	ASD	5	0	9.1	batch1	ATP	25.5	Autism - confirmed by ADI-R	Y	-
AN13872	ba41-42-22	ASD	5	1	6.9	batch1	ATP	33	Autism - confirmed by ADI-R	Y	-
UMB5144	ba41-42-22	ASD	7	0	7.7	batch1	NICHD	3	Autism - confirmed by ADI-R	Y	-
AN16641	ba41-42-22	ASD	9	0	4.7	batch1	ATP	27	Autism - confirmed by ADI-R	Y	-
AN06365	ba41-42-22	ASD	10	0	8	batch1	ATP	17.7	Chromosome 15q Duplication Syndrome	Y	-
AN09402	ba41-42-22	ASD	11	0	7.5	batch1	ATP	10.5	Chromosome 15q Duplication Syndrome	Y	-
AN17678	ba41-42-22	ASD	11	0	2.7	batch3	ATP	21.04*	Autism - confirmed by ADI-R	Y	-
AN02987	ba41-42-22	ASD	15	0	8.6	batch1	ATP	30.8	Autism - suspected; seeking records	Y	Y
AN04682	ba41-42-22	ASD	15	0	8.2	batch1	ATP	23.23	Autism - suspected; seeking records	Y	Y
UMB5302	ba41-42-22	ASD	16	0	3.7	batch1	NICHD	20	Autism - supported by records	Y	Y
AN00764	ba41-42-22	ASD	20	0	2.5	batch1	ATP	23.7	Autism - confirmed by ADI-R	Y	Y
AN03935	ba41-42-22	ASD	20	0	7.9	batch1	ATP	28.08	Chromosome 15q Duplication Syndrome	Y	Y
UMB4999	ba41-42-22	ASD	21	0	8.4	batch1	NICHD	14	Autism - Suspected	Y	Y
UMB5176	ba41-42-22	ASD	22	0	5.3	batch2	NICHD	18	Autism - confirmed by ADI-R	Y	-
AN05983	ba41-42-22	ASD	24	0	8.7	batch1	ATP	36.36	Chromosome 15q Duplication Syndrome	Y	Y
AN14829	ba41-42-22	ASD	26	1	6.2	batch1	ATP	28.67	Chromosome 15q Duplication Syndrome	Y	Y
AN00493	ba41-42-22	ASD	27	0	5.7	batch3	ATP	8.3	Autism - confirmed by ADI-R	Y	Y
AN08166	ba41-42-22	ASD	29	0	6.4	batch1	ATP	43.25	Autism - confirmed by ADI-R	Y	Y
UMB5297	ba41-42-22	ASD	33	0	6.7	batch1	NICHD	50	Autism - Suspected	Y	-
AN06420	ba41-42-22	ASD	39	0	3.1	batch1	ATP	13.95	Autism - confirmed by ADI-R	Y	Y
AN11931	ba41-42-22	ASD	39	1	8.5	batch1	ATP	32.83	Chromosome 15q Duplication Syndrome	Y	Y
UMB5115	ba41-42-22	ASD	46	0	8.2	batch1	NICHD	29	Autism - confirmed by ADI-R	Y	Y
AN03632	ba41-42-22	ASD	49	1	8.1	batch1	ATP	21.08	Autism - suspected; no confirmation	Y	Y
AN17254	ba41-42-22	ASD	51	0	8.3	batch1	ATP	22.16	Autism - confirmed by ADI-R	Y	-
UMB5340	ba41-42-22	ASD	53	0	8.2	batch1	NICHD	21.04*	Autism - confirmed by ADI-R	Y	-
AN09714	ba41-42-22	ASD	60	0	7.2	batch1	ATP	26.5	Autism - confirmed by ADI-R	Y	Y
UMB5303	ba41-42-22	ASD	67	0	8.5	batch1	NICHD	16	Autism - supported by records	Y	-
UMB4337	ba41-42-22	CTL	8	0	5.8	batch2	NICHD	16	No Known Disorder	Y	-
UMB5309	ba41-42-22	CTL	14	1	6.6	batch3	NICHD	8	No known disorder	Y	-
AN17425	ba41-42-22	CTL	16	0	6.75	batch1	ATP	26.16	No Known Disorder	Y	Y
AN07444	ba41-42-22	CTL	17	0	8.2	batch1	ATP	30.75	No Known Disorder	Y	Y
AN03217	ba41-42-22	CTL	19	0	6.7	batch1	ATP	18.58	No Known Disorder	Y	Y
UMB4590	ba41-42-22	CTL	20	0	8.3	batch1	NICHD	19	No Known Disorder	Y	Y
AN07176	ba41-42-22	CTL	21	0	6.65	batch1	ATP	29.91	No Known Disorder	Y	Y
UMB5342	ba41-42-22	CTL	23	0	7.7	batch1	NICHD	14	No Known Disorder	Y	Y
AN14757	ba41-42-22	CTL	24	0	5.5	batch1	ATP	21.33	No Known Disorder	Y	Y
AN19760	ba41-42-22	CTL	28	0	6.1	batch1	ATP	23.25	No Known Disorder	Y	-
AN12137	ba41-42-22	CTL	31	0	6.4	batch1	ATP	32.92	No Known Disorder	Y	Y
UMB5079	ba41-42-22	CTL	33	0	7.9	batch1	NICHD	16	No Known Disorder	Y	-
AN08161	ba41-42-22	CTL	36	1	8.1	batch1	ATP	23.83	No Known Disorder	Y	Y
UMB1376	ba41-42-22	CTL	37	0	5	batch2	NICHD	12	No Known Disorder	Y	-
AN08677	ba41-42-22	CTL	38	0	8	batch1	ATP	25.47	No Known Disorder	Y	Y
AN01410	ba41-42-22	CTL	41	0	7.4	batch1	ATP	27.17	No Known Disorder	Y	-
AN04479	ba41-42-22	CTL	44	0	7.05	batch1	ATP	23.26	No Known Disorder	Y	Y
UMB4842	ba41-42-22	CTL	47	0	8.1	batch1	NICHD	12	No Known Disorder	Y	Y
AN19442	ba41-42-22	CTL	50	0	5.5	batch3	ATP	20.4	No Known Disorder	Y	-
AN15088	ba41-42-22	CTL	52	1	4.2	batch2	ATP	17.88	No Known Disorder	Y	-
UMB1578	ba41-42-22	CTL	53	0	8.1	batch1	NICHD	17	No Known Disorder	Y	Y
AN13295	ba41-42-22	CTL	56	0	6.3	batch1	ATP	22.12	No Known Disorder	Y	Y
AN11864	ba41-42-22	CTL	57	0	5.4	batch2	ATP	22.33	No Known Disorder	Y	-
AN10723	ba41-42-22	CTL	60	0	8.7	batch1	ATP	24.23	No Known Disorder	Y	Y
AN03345	ba9	ASD	2	0	6.9	batch1	ATP	4	Autism - confirmed by ADI-R	Y	-
UMB5144	ba9	ASD	7	0	8	batch1	NICHD	3	Autism - confirmed by ADI-R	Y	-
AN16641	ba9	ASD	9	0	5.3	batch1	ATP	27	Autism - confirmed by ADI-R	Y	-
AN09402	ba9	ASD	11	0	6.7	batch2	ATP	10.5	Chromosome 15q Duplication Syndrome	Y	-
AN16115	ba9	ASD	11	1	9.1	batch1	ATP	12.88	Autism - confirmed by ADI-R	Y	-
AN04682	ba9	ASD	15	0	7.8	batch1	ATP	23.23	Autism - suspected; seeking records	Y	Y
AN17138	ba9	ASD	16	0	7.2	batch1	ATP	21.04*	Chromosome 15q Duplication Syndrome	Y	-
AN00764	ba9	ASD	20	0	8.5	batch1	ATP	23.7	Autism - confirmed by ADI-R	Y	Y
AN03935	ba9	ASD	20	0	8	batch1	ATP	28.08	Chromosome 15q Duplication Syndrome	Y	Y
UMB4999	ba9	ASD	21	0	8.2	batch1	NICHD	14	Autism - Suspected	Y	Y
AN09730	ba9	ASD	22	0	3.2	batch1	ATP	25	Autism - confirmed by ADI-R	Y	Y
UMB5176	ba9	ASD	23	0	7.2	batch3	NICHD	18	Autism - confirmed by ADI-R	Y	-
AN05983	ba9	ASD	24	0	7.8	batch2	ATP	36.36	Chromosome 15q Duplication Syndrome	Y	-
AN14829	ba9	ASD	26	1	3.5	batch3	ATP	28.67	Chromosome 15q Duplication Syndrome	Y	Y
AN00493	ba9	ASD	27	0	7.3	batch1	ATP	8.3	Autism - confirmed by ADI-R	Y	Y
AN08166	ba9	ASD	29	0	6.4	batch1	ATP	43.25	Autism - confirmed by ADI-R	Y	Y
AN12457	ba9	ASD	29	1	5.5	batch1	ATP	17.83	Autism - confirmed by ADI-R	Y	Y
AN08792	ba9	ASD	30	0	5.1	batch1	ATP	20.3	Autism - confirmed by ADI-R	Y	Y
AN01971	ba9	ASD	38	0	2.9	batch1	ATP	31.5	Autism - confirmed by ADI-R	Y	Y
AN06420	ba9	ASD	39	0	8	batch1	ATP	13.95	Autism - confirmed by ADI-R	Y	Y
AN11931	ba9	ASD	39	1	7.9	batch2	ATP	32.83	Chromosome 15q Duplication Syndrome	Y	-
AN03632	ba9	ASD	49	1	8	batch1	ATP	21.08	Autism - suspected; no confirmation	Y	Y
UMB5340	ba9	ASD	53	0	8.4	batch1	NICHD	21.04*	Autism - confirmed by ADI-R	Y	-
AN17515	ba9	ASD	54	0	8.1	batch1	ATP	28.25	Autism - confirmed by ADI-R	Y	Y
AN09714	ba9	ASD	60	0	7.6	batch1	ATP	26.5	Autism - confirmed by ADI-R	Y	Y
UMB5303	ba9	ASD	67	0	7.4	batch3	NICHD	16	Autism - supported by records	Y	-
UMB4337	ba9	CTL	8	0	5.8	batch2	NICHD	16	No Known Disorder	Y	-
UMB4787	ba9	CTL	13	0	6.7	batch3	NICHD	15	No known disorder	Y	-
UMB5163	ba9	CTL	15	0	6.7	batch1	NICHD	12	No Known Disorder	Y	Y
UMB5242	ba9	CTL	15	0	8.4	batch1	NICHD	9	No Known Disorder	Y	Y
AN17425	ba9	CTL	16	0	6.55	batch1	ATP	26.16	No Known Disorder	Y	Y
AN00544	ba9	CTL	17	0	7.8	batch1	ATP	28.92	No Known Disorder	Y	Y
AN07444	ba9	CTL	17	0	3.5	batch2	ATP	30.75	No Known Disorder	Y	-
AN03217	ba9	CTL	19	0	7.25	batch1	ATP	18.58	No Known Disorder	Y	Y
AN07176	ba9	CTL	21	0	5.75	batch1	ATP	29.91	No Known Disorder	Y	Y
AN10833	ba9	CTL	22	0	5.1	batch1	ATP	21.47	No Known Disorder	Y	-
AN14757	ba9	CTL	24	0	8.3	batch1	ATP	21.33	No Known Disorder	Y	Y
AN19760	ba9	CTL	28	0	8	batch1	ATP	23.25	No Known Disorder	Y	Y
AN12137	ba9	CTL	31	0	4.6	batch2	ATP	32.92	No Known Disorder	Y	-
AN15566	ba9	CTL	32	1	7.5	batch1	ATP	28.92	No Known Disorder	Y	Y
UMB5079	ba9	CTL	33	0	7.8	batch1	NICHD	16	No Known Disorder	Y	Y
AN08161	ba9	CTL	36	1	8.1	batch1	ATP	23.83	No Known Disorder	Y	Y
AN10028	ba9	CTL	36	0	6.2	batch1	ATP	21.46	No Known Disorder	Y	Y
UMB1376	ba9	CTL	37	0	4.8	batch2	NICHD	12	No Known Disorder	Y	-
AN01410	ba9	CTL	41	0	7.4	batch1	ATP	27.17	No Known Disorder	Y	Y
AN10679	ba9	CTL	41	1	8.4	batch1	ATP	14	No Known Disorder	Y	Y
AN00142	ba9	CTL	44	0	6.2	batch2	ATP	24.61	No Known Disorder	Y	-
AN04479	ba9	CTL	44	0	7.6	batch1	ATP	23.26	No Known Disorder	Y	-
UMB4842	ba9	CTL	47	0	7.9	batch1	NICHD	12	No Known Disorder	Y	Y
AN19442	ba9	CTL	50	0	6.9	batch2	ATP	20.4	No Known Disorder	Y	-
UMB1578	ba9	CTL	53	0	8.1	batch1	NICHD	17	No Known Disorder	Y	Y
AN01125	ba9	CTL	56	0	7	batch1	ATP	24.17	No Known Disorder	Y	Y
AN11864	ba9	CTL	57	0	7.3	batch2	ATP	22.33	No Known Disorder	Y	-
AN10723	ba9	CTL	60	0	8.3	batch1	ATP	24.23	No Known Disorder	Y	Y
AN08873	vermis	ASD	5	0	6.2	batch1	ATP	25.5	Autism - confirmed by ADI-R	Y	-
AN13872	vermis	ASD	5	1	7.8	batch1	ATP	33	Autism - confirmed by ADI-R	Y	-
UMB4849	vermis	ASD	7	0	8.1	batch1	NICHD	20	Autism - confirmed by ADI-R	Y	-
UMB5144	vermis	ASD	7	0	8.2	batch1	NICHD	3	Autism - confirmed by ADI-R	Y	-
AN16641	vermis	ASD	9	0	6.3	batch1	ATP	27	Autism - confirmed by ADI-R	Y	-
AN09402	vermis	ASD	11	0	8	batch1	ATP	10.5	Chromosome 15q Duplication Syndrome	Y	-
AN16115	vermis	ASD	11	1	7.9	batch1	ATP	12.88	Autism - confirmed by ADI-R	Y	-
AN17678	vermis	ASD	11	0	8.4	batch1	ATP	21.04*	Autism - confirmed by ADI-R	Y	-
AN02987	vermis	ASD	15	0	8.2	batch1	ATP	30.8	Autism - suspected; seeking records	Y	-
AN04682	vermis	ASD	15	0	8	batch1	ATP	23.23	Autism - suspected; seeking records	Y	-
AN15451	vermis	ASD	16	0	6.3	batch3	ATP	39.91	Chromosome 15q Duplication Syndrome	Y	-
AN00764	vermis	ASD	20	0	6.8	batch1	ATP	23.7	Autism - confirmed by ADI-R	Y	-
UMB4999	vermis	ASD	21	0	8.4	batch1	NICHD	14	Autism - Suspected	Y	-
UMB5176	vermis	ASD	23	0	8.1	batch1	NICHD	18	Autism - confirmed by ADI-R	Y	-
AN05983	vermis	ASD	24	0	7.9	batch1	ATP	36.36	Chromosome 15q Duplication Syndrome	Y	-
AN14829	vermis	ASD	26	1	5.7	batch3	ATP	28.67	Chromosome 15q Duplication Syndrome	Y	-
AN00493	vermis	ASD	27	0	7	batch1	ATP	8.3	Autism - confirmed by ADI-R	Y	-
AN08166	vermis	ASD	29	0	7.6	batch1	ATP	43.25	Autism - confirmed by ADI-R	Y	-
UMB5297	vermis	ASD	33	0	5	batch3	NICHD	50	Autism - Suspected	Y	-
AN06420	vermis	ASD	39	0	6.6	batch1	ATP	13.95	Autism - confirmed by ADI-R	Y	-
UMB5115	vermis	ASD	46	0	8.1	batch1	NICHD	29	Autism - confirmed by ADI-R	Y	-
AN03632	vermis	ASD	49	1	6.7	batch1	ATP	21.08	Autism - suspected; no confirmation	Y	-
AN17254	vermis	ASD	51	0	5.7	batch1	ATP	22.16	Autism - confirmed by ADI-R	Y	-
UMB5340	vermis	ASD	53	0	8.1	batch1	NICHD	21.04*	Autism - confirmed by ADI-R	Y	-
AN17515	vermis	ASD	54	0	8.1	batch1	ATP	28.25	Autism - confirmed by ADI-R	Y	-
AN01093	vermis	ASD	58	0	2.3	batch1	ATP	19.48	Autism - confirmed by ADI-R	Y	-
AN09714	vermis	ASD	60	0	6.4	batch1	ATP	26.5	Autism - confirmed by ADI-R	Y	-
UMB5303	vermis	ASD	67	0	7.1	batch1	NICHD	16	Autism - supported by records	Y	-
UMB4337	vermis	CTL	8	0	8.6	batch1	NICHD	16	No Known Disorder	Y	-
UMB1793	vermis	CTL	12	0	6.2	batch3	NICHD	19	No known disorder	Y	-
UMB1670	vermis	CTL	13	0	6.1	batch3	NICHD	5	No known disorder	Y	-
UMB4787	vermis	CTL	13	0	6.1	batch3	NICHD	15	No known disorder	Y	-
UMB5309	vermis	CTL	14	1	5.1	batch3	NICHD	8	No known disorder	Y	-
UMB5163	vermis	CTL	15	0	6.5	batch1	NICHD	12	No Known Disorder	Y	-
UMB5242	vermis	CTL	15	0	7.35	batch1	NICHD	9	No Known Disorder	Y	-
AN17425	vermis	CTL	16	0	6.7	batch1	ATP	26.16	No Known Disorder	Y	-
UMB5168	vermis	CTL	16	1	7.4	batch1	NICHD	0	No Known Disorder	Y	-
AN07444	vermis	CTL	17	0	8.3	batch1	ATP	30.75	No Known Disorder	Y	-
AN03217	vermis	CTL	19	0	6.5	batch1	ATP	18.58	No Known Disorder	Y	-
UMB4590	vermis	CTL	20	0	8.5	batch1	NICHD	19	No Known Disorder	Y	-
AN10833	vermis	CTL	22	0	8	batch1	ATP	21.47	No Known Disorder	Y	-
UMB5342	vermis	CTL	23	0	7.7	batch1	NICHD	14	No Known Disorder	Y	-
AN14757	vermis	CTL	24	0	7.85	batch1	ATP	21.33	No Known Disorder	Y	-
AN19760	vermis	CTL	28	0	6.8	batch1	ATP	23.25	No Known Disorder	Y	-
AN12137	vermis	CTL	31	0	7.3	batch1	ATP	32.92	No Known Disorder	Y	-
AN15566	vermis	CTL	32	1	7.5	batch1	ATP	28.92	No Known Disorder	Y	-
UMB5079	vermis	CTL	33	0	8.3	batch1	NICHD	16	No Known Disorder	Y	-
AN08161	vermis	CTL	36	1	7.3	batch1	ATP	23.83	No Known Disorder	Y	-
AN10028	vermis	CTL	36	0	7.8	batch1	ATP	21.46	No Known Disorder	Y	-
UMB1376	vermis	CTL	37	0	8.3	batch1	NICHD	12	No Known Disorder	Y	-
AN08677	vermis	CTL	38	0	8.3	batch1	ATP	25.47	No Known Disorder	Y	-
AN01410	vermis	CTL	41	0	7.9	batch1	ATP	27.17	No Known Disorder	Y	-
AN10679	vermis	CTL	41	1	8.2	batch1	ATP	14	No Known Disorder	Y	-
AN00142	vermis	CTL	44	0	7.8	batch1	ATP	24.61	No Known Disorder	Y	-
UMB4842	vermis	CTL	47	0	4.7	batch2	NICHD	12	No Known Disorder	Y	-
UMB1578	vermis	CTL	53	0	8	batch1	NICHD	17	No Known Disorder	Y	-
AN01125	vermis	CTL	56	0	5.9	batch1	ATP	24.17	No Known Disorder	Y	-
AN13295	vermis	CTL	56	0	8.3	batch1	ATP	22.12	No Known Disorder	Y	-
AN11864	vermis	CTL	57	0	7.1	batch2	ATP	22.33	No Known Disorder	Y	-
AN10723	vermis	CTL	60	0	8.2	batch1	ATP	24.23	No Known Disorder	Y	-
								*The PMI value is not available. Instead, we used the median value of all available PMI values of brain samples deposited in the original stuay (Parikshak NN, Swarup V, Belgard TG, Irimia M, Ramaswami G, Gandal MJ, Hartl C, Leppa V, Ubieta LT, Huang J et al. 2016. Genome-wide changes in lncRNA, splicing, and regional gene expression patterns in autism. Nature 540: 423-427).

## Sheet: Adjusted circRNA expression
circRNAs	AN00493.ba41-42-22	AN00764.ba41-42-22	AN01410.ba41-42-22	AN02987.ba41-42-22	AN03217.ba41-42-22	AN03632.ba41-42-22	AN03935.ba41-42-22	AN04479.ba41-42-22	AN04682.ba41-42-22	AN05983.ba41-42-22	AN06365.ba41-42-22	AN06420.ba41-42-22	AN07176.ba41-42-22	AN07444.ba41-42-22	AN08161.ba41-42-22	AN08166.ba41-42-22	AN08677.ba41-42-22	AN08873.ba41-42-22	AN09402.ba41-42-22	AN09714.ba41-42-22	AN10723.ba41-42-22	AN11864.ba41-42-22	AN11931.ba41-42-22	AN12137.ba41-42-22	AN13295.ba41-42-22	AN13872.ba41-42-22	AN14757.ba41-42-22	AN14829.ba41-42-22	AN15088.ba41-42-22	AN16641.ba41-42-22	AN17254.ba41-42-22	AN17425.ba41-42-22	AN17678.ba41-42-22	AN19442.ba41-42-22	AN19760.ba41-42-22	UMB1376.ba41-42-22	UMB1578.ba41-42-22	UMB4337.ba41-42-22	UMB4590.ba41-42-22	UMB4842.ba41-42-22	UMB4999.ba41-42-22	UMB5079.ba41-42-22	UMB5115.ba41-42-22	UMB5144.ba41-42-22	UMB5176.ba41-42-22	UMB5297.ba41-42-22	UMB5302.ba41-42-22	UMB5303.ba41-42-22	UMB5309.ba41-42-22
chr1_100906852_100921841:+	-0.0463576	-0.0285874	-0.0269443	-0.041955	-0.026614	-0.0397409	-0.00441986	-0.0204596	-0.0261357	-0.0407132	-0.0201233	-0.0135215	-0.0318006	-0.0418494	-0.0348637	-0.0414161	0.00116541	-0.0396254	-0.0229557	-0.0366149	-0.0425877	-0.0334395	-0.00588098	-0.00974709	-0.0250809	-0.0329538	-0.0174346	-0.0487813	-0.0403476	-0.0307996	-0.0519879	-0.0150016	-0.0442738	0.0110783	-0.0275242	-0.00394097	-0.0378405	-0.0211405	0.0165258	-0.0425145	-0.0132104	-0.0211304	-0.0396529	-0.0020777	-0.0262023	-0.02974	-0.014297	-0.0402076	-0.0411151
chr1_100913663_100974902:+	-0.119107	-0.0281641	-0.0695648	-0.0980097	-0.0893118	-0.0899841	-0.0774311	-0.0867548	-0.0717257	-0.108782	-0.0919595	-0.0505961	-0.0981086	-0.128679	-0.0821351	-0.0243065	0.0360993	-0.0234704	-0.105414	-0.0745921	-0.111604	0.0028988	0.00200299	-0.0786446	-0.082451	-0.09543	-0.0711921	-0.111341	-0.0992082	-0.0198221	-0.154016	-0.0402345	-0.111657	-0.0610279	-0.0665896	-0.0944138	0.0102667	-0.11229	-0.0755118	-0.00726008	0.00156945	-0.0610077	-0.0915079	0.0216971	-0.0457698	-0.0752376	-0.0913157	-0.0167836	-0.024666
chr1_103565435_103575540:+	-0.26895	-0.16912	-0.397244	-0.112644	-0.325887	-0.188821	-0.267008	-0.281304	-0.117258	-0.170318	-0.233172	-0.133917	-0.136784	-0.124429	-0.143265	-0.203946	-0.0543807	-0.32396	-0.339833	-0.142536	-0.269139	-0.194163	-0.100786	-0.105609	-0.269996	-0.144645	-0.241142	-0.0380057	-0.00521126	-0.198218	-0.196631	-0.179496	-0.174749	-0.181847	-0.154214	-0.144018	-0.229732	-0.246702	-0.225942	-0.291045	-0.0480421	-0.256955	-0.172984	-0.114186	-0.130592	-0.199044	-0.267135	-0.179744	-0.171174
chr1_114463104_114464388:-	0.024807	0.0328869	0.038496	0.0355061	0.0326476	0.0114351	0.0544243	-0.00932238	0.0425533	0.0512132	0.0482431	0.035303	0.028613	0.0508438	0.0203172	0.0406064	0.101523	0.124809	0.00665283	0.00460623	0.0375375	0.102738	0.08311	0.0173243	0.0711812	0.0266698	0.026202	0.0231303	0.231863	0.0546992	0.017023	0.0506266	0.150717	0.0280564	0.00801575	0.0199995	0.0234422	-0.0173382	0.0387577	0.0029268	0.0224437	0.0234907	-0.0198969	0.101141	0.103145	0.0278088	0.0586434	-0.0232227	-0.0222005
chr1_117402186_117414831:+	-0.48042	-0.538398	-0.405887	-0.439654	-0.434101	-0.449376	-0.43488	-0.494445	-0.488688	-0.395774	-0.570043	-0.502997	-0.467755	-0.766694	-0.353577	-0.508053	-0.200464	-0.582887	-0.572673	-0.421106	-0.24974	-0.14559	-0.0780342	-0.320175	-0.366009	-0.44075	-0.207972	-0.41985	-0.268501	-0.370283	-0.527399	-0.262886	-0.377729	-0.480956	-0.396966	-0.5378	-0.431111	-0.33888	-0.599587	-0.611046	-0.362745	-0.541057	-0.521526	-0.477779	-0.441327	-0.457718	-0.467611	-0.562165	-0.541453
chr1_117402186_117420649:+	-1.37232	-1.29717	-2.33253	-2.88812	-1.46897	-1.4464	-1.77619	-2.44208	-1.43735	-1.22067	-1.44805	-1.57805	-1.36034	-1.23943	-1.41596	-1.18311	-0.504811	-2.99828	-1.58869	-1.34576	-0.932722	-0.689504	0.323365	-1.17946	-1.78021	-1.41537	-0.727174	-1.02437	-0.920089	-1.13627	-1.46025	-1.06189	-2.68896	-1.54035	-1.5964	-3.19579	-1.47036	-0.476679	-2.6527	-1.44179	-1.10624	-1.95615	-2.6337	-2.55157	-0.809998	-1.32489	-1.12181	-1.5215	-1.37181
chr1_117402186_117466427:+	-0.0314174	-0.0835548	-0.0771993	-0.133009	-0.0805379	-0.0860588	-0.0547843	-0.0870564	-0.0688835	-0.0344753	-0.104667	-0.0401165	-0.0577589	-0.0265408	-0.0943784	-0.0671192	-0.00865839	-0.121733	-0.103425	-0.0553741	-0.00341562	-0.0687329	0.0434823	-0.0766143	-0.0155766	-0.0916673	-0.0937597	-0.0756486	-0.0876974	-0.0672263	-0.10642	-0.0524737	-0.10308	-0.0792122	-0.0863623	-0.120568	-0.0787826	0.0253197	-0.0899345	-0.0898932	-0.0880801	-0.100993	-0.114863	-0.0763446	-0.0953266	-0.1067	-0.0728725	-0.097437	-0.0610908
chr1_117460489_117502970:+	-0.0289275	-0.0401506	-0.0455358	-0.0574413	-0.0424489	-0.0475484	-0.0469597	-0.0481938	-0.040233	-0.0222034	-0.0363017	-0.0319099	-0.0471348	-0.0216006	-0.0246905	-0.0518742	-0.0192851	-0.0593622	-0.0373663	-0.0434763	-0.0178473	-0.0431038	-0.0406804	-0.0448097	-0.05194	-0.0506607	-0.0507662	-0.0422983	-0.00194013	-0.0150151	-0.033197	-0.0249148	-0.0409832	-0.0108653	-0.0489294	-0.0634812	0.0254472	-0.00992129	-0.0420486	0.0126548	-0.0386388	-0.0538777	-0.0416627	-0.010461	0.000575689	0.0143797	-0.0285775	-0.052261	-0.0351915
chr1_12001401_12002103:+	0.0325825	0.0389169	0.0219441	0.0278733	0.0118899	0.0236123	0.0155757	0.00804373	0.0153561	0.0287541	0.0463208	0.0418021	0.0311456	0.0302755	0.0410581	0.063565	0.0104781	0.0361595	0.00991323	0.0236111	0.0661454	0.0974143	0.0220516	0.0325215	0.0139614	0.0162936	0.0265558	0.0433311	0.0463528	0.0172524	0.000938308	0.0515385	0.0238129	0.0161331	0.0328957	0.0325321	0.0376751	0.0302008	0.00823036	0.0294456	0.047438	0.00941549	0.0086727	0.0139697	0.00930411	0.0143715	0.00470859	0.0174332	0.0381085
chr1_1223244_1223968:-	-0.00490096	0.0240277	-0.00526998	0.010024	-0.000473802	0.00530195	-0.0331171	-0.0178716	-0.0392752	-0.0299959	0.00413476	0.0525223	0.00201649	0.0601483	-0.0257181	-0.0162795	-0.0386764	0.00368308	-0.0289916	-0.00970791	0.0259463	-0.00367786	0.014595	0.0184913	-0.0110681	-0.000147349	-0.000481833	0.0261804	-0.0193072	0.0190078	-0.039602	0.0293845	0.0279732	0.0621524	0.0273058	-0.0101792	0.00938953	-0.0118025	-0.00738693	-0.0357757	0.00771122	-0.0207797	0.0346114	-0.00979729	0.0235898	-0.00603095	-0.00853124	0.0227291	-0.0336643
chr1_147252623_147259918:+	-0.0234759	-0.00181934	-0.0171205	-0.0311433	-0.0191724	0.00713435	-0.0304424	-0.0182215	-0.00305345	0.057682	-0.0259021	0.0111854	-0.0138135	-0.00646568	0.00421321	-0.0264763	-0.00652918	-0.0293474	-0.0326744	-0.0336089	0.00536443	0.0178847	-0.000402192	0.0409931	0.00234169	-0.0166064	-0.0056673	-0.019585	0.0128257	0.0557366	-0.0337676	-0.00406593	0.00887166	0.0620749	0.0258662	0.00128944	-0.0220295	0.00621597	-0.0111026	-0.02317	-0.0211304	-0.0194243	0.0133005	0.013707	-0.0147471	-0.0227616	-0.0149724	-0.0187757	0.0310447
chr1_151315573_151316509:-	0.0690245	0.0727606	0.0331338	0.0229383	0.0212075	0.0529398	0.0210996	0.0433487	0.0320583	0.019263	0.0221318	0.0342133	0.0243567	0.0382561	0.0490867	0.0675834	0.0224878	0.0629592	0.0229565	0.0260232	0.06208	0.0311817	0.0652296	0.031423	0.0605418	0.0260521	0.0282386	0.0548949	0.0312385	0.037213	0.0271824	0.0283846	0.0339082	0.041375	0.0366528	0.0472395	0.0659865	0.0228619	0.0322512	0.0238397	0.0407976	0.0217201	0.0549078	0.0469928	0.0407669	0.0145278	0.0143281	0.0275722	0.0346777
chr1_155395459_155459898:-	-0.000237286	-0.00707249	-0.0165378	-0.0155114	0.00640099	-0.00898955	-0.00478973	-0.00463153	0.0256196	-0.0161649	0.0119446	-0.0106553	0.00242582	0.00127304	-0.0186125	-0.0119881	-0.0215228	0.0274841	-0.00292943	0.000199138	-0.00784874	-0.00623406	0.0155986	-0.0028498	-0.00827414	0.0218049	-0.0153588	0.00587347	0.0298352	0.0108407	-0.00565021	-0.00564046	-0.0161771	-0.0278709	-0.00111062	0.0451097	0.0115962	0.0111064	0.026613	0.00327157	-0.0124362	-0.0136736	-0.0111404	-0.0113264	-0.0111439	-0.0032186	0.0150777	-0.017303	-0.0180402
chr1_155438327_155439068:-	-0.0253069	0.0495934	0.0236308	0.071661	0.0241947	0.0947922	0.0222773	-0.00086124	0.0111694	-0.000227711	0.0279015	0.046393	0.00497448	0.100353	0.0396588	0.0628074	0.0377853	0.0325507	0.00954287	-0.0134433	0.185308	0.00803369	0.0796245	0.0294678	0.0392517	-0.00251679	0.0813776	0.0158056	0.030721	0.0833632	-0.00978164	0.040112	-0.0210934	-0.033595	0.0130402	0.00230759	-0.00700304	0.0828495	0.0217692	-0.0202554	-0.0257971	0.000627412	0.00928704	0.0620917	0.072144	0.00430697	0.0117211	-0.00885767	0.141561
chr1_155853276_155853806:-	-0.0903751	-0.0331811	-0.0963009	-0.0337505	-0.0653743	-0.0514747	-0.0758507	-0.0745935	-0.0670538	-0.0761688	-0.0250187	-0.0668382	-0.0686313	-0.0413152	-0.0734194	-0.0600522	-0.0751169	-0.0394981	-0.0688667	-0.0865538	0.0376437	0.0130092	-0.0805836	-0.0403653	-0.0492105	-0.0787492	-0.046915	-0.0273838	0.00115413	-0.0641367	-0.0524597	-0.0497763	-0.0447507	-0.051946	-0.0553811	-0.0207881	-0.0333824	-0.06117	-0.0539268	-0.0768396	-0.0336354	-0.0870717	-0.0770557	-0.0315358	0.0207358	-0.0838996	-0.016981	-0.0390858	-0.0929541
chr1_169230718_169287408:-	0.0214895	-0.0341871	-0.0152336	0.0581165	0.000534962	-0.0461851	-0.0155625	0.00447189	0.00769838	-0.00232403	-0.0275158	-0.0336017	0.0156373	0.00845372	-0.00552368	-0.0348884	0.00134755	-0.0250386	-0.0319257	-0.0296633	0.104328	-0.0172961	-0.00942006	-0.0269222	-0.00366323	-0.0215431	0.0208828	-0.0173254	-0.0139597	0.0574489	-0.0281898	0.0175571	0.0668832	-0.0359154	-0.0302621	-0.0397787	-0.0415117	-0.0361234	-0.00405255	-0.0167279	0.0346422	-0.016869	-0.024671	0.046171	0.0320215	-0.0159561	0.0164872	-0.0489093	-0.0349435
chr1_172131175_172253682:+	0.00627888	-0.00914153	-0.0382754	-0.035871	0.0352488	0.0188455	-0.0221292	-0.0183565	-0.0312925	0.04446	-0.0336788	-0.0230188	0.00929247	-0.00679512	0.0165547	-0.0376097	0.00552832	-0.00378236	-0.0163455	0.0711397	-0.0217596	-0.0266564	-0.0469982	0.00171813	-0.0319459	-0.0239003	-0.0245624	-0.0318815	0.0218066	0.0117655	-0.0075449	-0.0267433	-0.0130705	-0.0200626	-0.024982	0.0141829	-0.0241577	-0.0154591	-0.0295947	-0.0350588	-0.018847	-0.0313501	-0.0357697	-0.0330799	-0.026443	0.000736511	-0.0241819	-0.00970785	-0.0153411
chr1_176081152_176136547:-	0.0159147	0.0150063	0.0102514	0.0433313	-0.00890854	0.0427374	0.0147762	0.00158855	-0.0160385	-0.015051	-0.00141326	0.010796	0.0232191	0.0110802	0.0160712	0.0327746	-0.00710011	0.0149639	0.0102186	-0.0135054	0.0113754	-0.018035	0.0562071	-0.0103177	-0.00830931	-0.010636	0.00464094	-0.00153935	0.0520466	-0.000630966	-0.0136646	0.0368256	0.0468095	-0.024573	0.00637349	0.00459476	0.0271839	-0.0152686	-0.00397555	-0.00211442	-0.0112222	-0.00327978	0.0121451	0.000775922	0.0541372	0.0286037	0.00183845	-0.00870006	-0.023794
chr1_178456721_178467421:+	-0.029177	-0.0282447	-0.019144	0.0276814	-0.0120486	0.0243497	-0.0308757	-0.0293505	-0.0288915	-0.0342191	-0.0292744	-0.0242776	0.0051752	-0.0331841	-0.037797	-0.0306246	0.00587842	-0.0260864	-0.0359708	-0.0260046	-0.00266728	-0.0306695	-0.00514656	-0.00326999	0.00864475	-0.0356479	-2.97e-06	-0.0219568	-0.0150765	-0.00725469	-0.0274644	0.0056136	-0.0322664	0.0165117	-0.0312701	0.00260572	-0.0322759	-0.00369291	-0.0320392	-0.0110726	-0.0294172	-0.0334349	-0.0187135	-0.00156663	0.00378511	-0.0234515	0.00334262	-0.0137435	-0.0371303
chr1_179131311_179133374:-	-0.0274699	-0.0384375	-0.0614658	-0.0764353	-0.0605895	-0.0161577	-0.0568691	-0.0472407	-0.0442475	-0.0444461	-0.0487018	-0.0053999	-0.0245621	-0.0294084	-0.0256947	0.00778561	0.0119567	-0.0561257	-0.0327111	-0.0435143	-0.0460017	0.0267032	-0.0122165	-0.00838374	-0.00523952	-0.0362605	-0.00986418	-0.0280707	-0.0126521	-0.0224254	-0.0828679	-0.0221109	0.00854993	-0.0318511	-0.0471298	0.00772475	-0.022435	-0.0490764	-0.0484406	-0.0670403	-0.0549179	-0.0652619	-0.0322662	-0.00663741	0.0335404	-0.0114045	-0.0147683	-0.0397259	-0.0655035
chr1_180984677_180993425:-	-0.0616111	-0.0432211	-0.0958913	-0.159266	-0.0948551	-0.0608854	-0.0668934	-0.0981044	-0.0650713	-0.0552416	-0.0913362	-0.017109	-0.12235	-0.111366	-0.0686121	-0.111005	-0.00665887	0.14091	-0.0352363	-0.0734425	-0.0192844	0.00954344	-0.0471687	-0.096178	-0.0824411	-0.0975928	-0.124192	-0.026691	-0.0544358	-0.102939	-0.0659586	-0.105752	-0.139883	-0.0416635	-0.117534	-0.101336	-0.022769	0.066143	-0.0513594	-0.0605525	0.012057	-0.0232877	-0.0750609	-0.121115	0.105088	-0.0523751	-0.0264348	-0.0672173	-0.0691476
chr1_180984677_181005463:-	0.0198872	-0.0173808	-0.0188509	0.00230532	-0.00859803	-0.0172712	-0.027527	-0.0126863	-0.00429384	-0.0205633	-0.0111511	0.000792472	0.0107669	-0.0230022	0.0010175	-0.0206263	-0.0217589	-0.0103389	0.00208139	-0.0181717	0.0143219	0.0313045	-0.0181123	0.017851	-0.017435	-0.0160828	-0.0211001	-0.000313263	-0.0259374	0.00180441	-0.0249039	-0.00146897	-0.0249563	-0.0234001	-0.0187578	0.0336886	-0.017958	0.020343	-0.0229178	-0.0189743	-0.00328951	-0.0207892	0.00284484	-0.00049872	0.00666243	-0.00114236	0.0225879	-0.0196444	-0.0320329
chr1_197642711_197658369:-	-0.0358689	-0.03052	-0.0497995	-0.0418408	-0.0314371	-0.0298649	-0.0278967	-0.0509282	-0.0397432	-0.0266458	-0.0540065	-0.0564014	-0.0272858	0.0255135	-0.042739	-0.0472274	-0.0376381	-0.0544052	-0.0266659	0.0406446	-0.0207063	0.0292381	-0.016333	-0.0490833	-0.00575771	-0.037504	-0.0243299	-0.0277759	-0.0545838	0.00413137	-0.0265009	-0.011529	-0.0292835	-0.0365599	-0.0392534	-0.0539237	0.0353463	-0.0222168	-0.0531767	-0.0324433	0.00528691	-0.0511723	-0.0496731	-0.025457	-0.0219978	-0.0314244	0.000898628	-0.0252248	-0.0441349
chr1_200760839_200815644:+	0.0329123	-0.0222795	-0.0101722	0.0202545	-0.0194036	0.0141192	-0.0270228	-0.0170163	-0.00309797	0.0217199	-0.0329715	0.0147848	-0.0117513	0.0412293	-0.0290128	0.0618398	0.0808892	0.0211932	-0.0281185	-0.00499839	0.02187	0.0325097	0.0497196	0.0153701	0.0116107	-0.00721581	0.0293299	0.027982	0.0335927	0.00963336	-0.00930972	0.0509463	-0.019538	0.00888075	-0.0119397	-0.0185386	0.00427437	-0.000270759	0.0346168	-0.00200289	0.010636	-0.00116025	0.0241913	0.01271	0.0252779	-0.0101542	0.0341854	0.0379591	0.00652293
chr1_201847279_201848594:+	0.0179707	0.00494022	-0.000312873	0.0108547	-0.00332561	0.012311	0.0163485	0.00971486	0.00249397	0.0166321	0.0191349	0.0227568	0.0425159	0.0166088	0.0471948	0.0534758	0.0698682	0.0369483	0.029962	0.0134373	0.0310399	0.0344869	0.036485	0.038189	0.0126767	0.030377	0.0258441	-0.00414989	0.0295609	0.000406268	0.00813851	0.00935249	0.00752468	0.0302095	0.000863439	0.0624396	0.0117101	0.0260183	0.0247615	0.0182255	0.013973	0.0264817	0.0114072	0.0580923	0.0348356	0.0208762	0.00199695	0.0469586	0.00249126
chr1_205001170_205002748:+	0.0476928	0.181258	0.0257599	0.109568	0.0771535	0.0618321	0.0502808	0.0804717	0.0925278	0.121791	0.0869034	0.0731429	0.102841	0.0750048	0.0821374	0.0367221	0.13146	0.150618	0.0690391	0.0974064	0.109291	0.122604	0.173512	0.0513984	0.0825664	0.0814446	0.0984908	0.0930238	0.0621519	0.116489	0.0422654	0.113491	0.0371299	0.0727384	0.0829848	0.0616506	0.104028	0.12587	0.0946919	0.0942942	0.0885507	0.0735756	0.0405205	0.0813047	0.0966216	0.0381016	0.0747415	0.073097	0.10866
chr1_20893517_20942330:-	-0.0364453	0.00985669	-0.035818	-0.0116658	-0.0162429	-0.0046508	-0.0315144	-0.0405753	-0.0244721	0.000350299	-0.0261211	-0.0344195	-0.0242269	-0.0246593	-0.0531609	0.0120194	-0.0324809	-0.021276	-0.00806566	-0.0312958	-0.0613266	0.00130588	-0.024674	-0.0454097	-0.0403081	-0.0137955	-0.02819	0.00315164	-0.0621857	-0.0407339	-0.0389077	-0.0117307	-0.0552523	-0.0195364	-0.0304242	0.1334	-0.0296302	-0.0428848	-0.0435675	-0.0077159	-0.0235182	-0.0567171	-0.0259371	-0.0237794	-0.038298	0.0152525	-0.00385938	-0.018885	-0.00443649
chr1_20904883_20942330:-	-0.0362935	0.0134522	-0.00442727	-0.0232896	-0.0225685	-0.00182907	-0.00122816	-0.0164437	0.00132129	-0.00152971	-0.00749538	0.00831197	-0.00869234	-0.00352316	-0.0279774	-0.0214623	-0.0220387	0.00796697	-0.010383	-0.0194798	0.0120423	0.00410902	-0.0224379	-0.0098524	-0.0237922	-0.027296	-0.0241771	-0.0229075	0.0147953	-0.0234673	-0.00562973	-0.0246133	-0.0101033	-0.0384042	0.0186107	0.0095246	0.00747792	0.0191272	-0.0206076	-0.0177357	-0.0203493	-0.0233477	-0.0205611	-0.0185735	-0.0241556	-0.00296444	0.00385845	0.00439685	-0.0388159
chr1_21050866_21111383:-	-0.0173328	-0.00865492	-0.00805311	0.00122539	-0.0183037	0.021661	0.0162764	-0.00236678	-0.0159278	-0.00689742	-0.0274853	0.0131795	0.00951475	-0.00394703	0.022236	0.0061387	0.0180323	0.0427328	-0.0266152	-0.0162472	-0.0184899	-0.00847885	0.0334008	-0.0150974	-0.0118867	-0.0216103	-0.00629149	0.0463514	-0.011745	-0.017515	-0.0222266	-0.00114361	0.0174967	-0.0100688	-0.00162455	-0.0167123	-0.00963778	0.0466467	-0.0162044	0.0382761	0.00598466	-0.0272558	-0.0175608	-0.00698065	0.05633	0.0187832	-0.0160533	-0.0249874	0.0164298
chr1_211018864_211090690:-	-0.0427993	-0.00211749	-0.0418113	-0.0210956	-0.0388917	-0.0422939	-0.0518219	-0.0549878	-0.0340637	0.0674454	-0.0354218	-0.0593997	-0.00478612	-0.0565916	-0.0183977	-0.0699629	-0.0122042	-0.0414044	-0.017309	-0.030373	0.0300729	-0.0553362	-0.048746	-0.0347961	-0.0234504	-0.0431325	0.0073748	-0.00603163	-0.0603326	-0.0631181	-0.0303631	-0.0475794	-0.00271918	-0.0486055	-0.0391447	-0.00421785	-0.0318774	0.0399205	-0.0514825	-0.0261254	-0.0253434	-0.0119448	0.00127132	-0.0490474	0.0145662	-0.020963	-0.0106875	-0.0283612	-0.0364643
chr1_211082780_211090690:-	-0.006211	0.0121354	-0.0216101	-0.0270429	-0.0186408	-0.0248736	-0.021339	-0.0214664	-0.0363008	0.0770321	-0.0141513	-0.0440221	-0.0152294	-0.0414912	0.0375909	-0.0315807	0.000159632	-0.0337354	-0.0348812	-0.00827095	-0.0271675	-0.0301599	-0.0151227	-0.033715	0.0139127	-0.0285578	0.0079693	-0.0244779	-0.0377943	0.0306586	-0.0277634	-0.03324	-0.0437832	-0.0342977	0.0524437	-0.0138897	-0.034776	-0.000647685	-0.0236564	-0.0140954	-0.0363483	-0.0367212	0.0439208	-0.0249902	-0.0377223	-0.0263751	-0.0200176	-0.0119665	-0.024434
chr1_211082780_211107377:-	-0.0123584	-0.0644712	-0.0597018	-0.0440446	-0.0285936	-0.0226974	-0.0412932	-0.0621999	-0.0626426	-0.0214065	-0.0340578	-0.0314783	-0.0308431	-0.0430062	-0.0183201	-0.0458434	-0.0721526	-0.0159524	-0.0182895	-0.0417861	-0.0496107	0.0432031	0.0397341	-0.028007	-0.0567247	-0.041929	0.0861226	-0.0333428	-0.0199318	-0.0790499	-0.0441202	0.00933411	-0.0819328	-0.0762212	-0.0576023	-0.0221893	0.0341187	-0.0446184	-0.0081461	-0.0387171	0.00292625	-0.033169	-0.0470174	0.0245663	-0.0805987	0.00444047	0.0140729	-0.0423504	-0.0489343
chr1_211778918_211793190:-	-0.0174998	-0.00871138	-0.0130359	0.051043	0.0338377	0.0322139	-0.0210439	-0.00165803	0.00619073	0.0397237	-0.00754499	-0.0255384	-0.0171134	0.0302757	0.00953209	-0.0353685	-0.0218493	0.0327014	-0.00635074	0.0813685	0.123232	0.0101825	-0.0319294	-0.0120004	0.00102229	0.0241896	-0.00263338	-0.0219601	-0.0357943	0.0959426	0.00415566	0.0287609	0.0365466	0.118386	-0.0177432	-0.000758473	0.0448109	0.088668	-0.0209407	0.0602835	0.00273002	0.0282635	-0.0154994	-0.0219258	0.0197138	0.0120898	0.0264755	-0.0183524	-0.0270323
chr1_213077696_213117410:+	-0.0475058	-0.00598669	-0.0333591	-0.055836	-0.0388464	-0.0226283	-0.0288477	-0.030348	-0.0326562	-0.0339847	-0.0289647	-0.0112976	-0.0637206	0.0401671	-0.0293424	-0.0340062	0.0419822	0.0106708	-0.0532025	0.0210933	-0.0453828	-0.0711557	-0.0103038	-0.0101332	0.0165427	0.00916209	-0.0349033	-0.0187359	-0.0418169	0.0422244	-0.045635	-0.0274172	0.00640145	0.0318105	-0.0335423	-0.0165128	0.0100441	-0.0320204	-0.0241145	-0.0474663	-0.0498625	-0.0457823	-0.00132841	-0.0516329	-0.00238812	-0.0551359	-0.0434978	-0.0318079	-0.0279064
chr1_213077696_213129889:+	-0.0289621	0.00772286	-0.0233423	-0.0169295	-0.0326022	-0.0281466	-0.0239346	-0.027777	-0.0144983	-0.0322016	-0.0182751	-0.0332225	0.00839328	0.0233293	0.0141716	-0.0322088	0.00349374	-0.0132877	-0.0300157	-0.0160019	-0.0256733	-0.0382729	0.0238121	0.00124073	0.011775	-0.0172098	-0.0261424	-0.0298258	-0.00980035	0.0117122	-0.0297935	-0.0284403	-0.0270862	0.0457159	-0.0294596	-0.0390923	-0.0336328	-0.0260681	-0.0195595	-0.0130461	-0.0303255	-0.0181153	-0.0248042	0.00859551	-0.0294899	-0.0163869	-0.00301292	-0.00953872	-0.0339196
chr1_213077696_213167973:+	-0.0434307	-0.0200089	0.00340522	-0.018295	-0.0325634	-0.0379363	-0.0270435	-0.0141064	-0.0254004	0.00986594	-0.0231703	-0.0323844	-0.0373245	-0.0331063	-0.0370704	-0.0333533	-0.0295092	0.0154745	-0.0222561	-0.0361809	-0.0215736	-0.00708914	0.0557021	0.00340141	-0.0201179	-0.0350727	-0.0354387	-0.00233492	-0.0436591	-0.0342221	-0.0283199	-0.038674	0.0116815	-0.0416437	-0.0122138	-0.00992991	0.0120107	-0.0323573	-0.0322335	-0.0320819	-0.0155454	-0.0296071	0.0292493	-0.0129815	-0.0261448	-0.0170999	-0.0283585	-0.0195562	0.0199632
chr1_213129527_213176492:+	-0.057305	-0.0487821	-0.0298689	-0.0245904	-0.0187718	-0.0293567	-0.0464191	-0.0366164	-0.020833	-0.0406096	-0.0433998	-0.0192394	-0.00147413	-0.0210847	-0.0391624	-0.0191822	-0.0259508	-0.0167642	-0.0288811	-0.0399129	-0.0283615	0.00335425	-0.0437956	-0.0215619	-0.0308967	-0.0249034	-0.0150269	-0.0358916	-0.0534976	-0.039525	-0.0475044	-0.0472293	0.0317674	-0.036637	-0.0393193	-0.00761859	-0.0077826	-0.0137518	-0.0402247	-0.0502012	-0.0239204	-0.0422193	-0.0214692	-0.017575	0.0261973	-0.0274367	-0.0169791	-0.0125854	-0.0474644
chr1_215169199_215172183:+	-0.114522	-0.0719014	-0.0432355	-0.0545826	-0.0448775	-0.00999036	0.0420389	-0.0644786	-0.0724289	-0.106275	-0.0474319	-0.0330653	-0.000873958	0.0519993	-0.0643865	-0.0724185	-0.0391268	0.0729899	-0.00983333	-0.0555397	0.0185547	-0.0668206	-0.0150479	-0.0453544	-0.0219931	-0.00998323	0.0357222	-0.0732848	-0.0635771	-0.0711675	-0.0589639	-0.0291859	-0.0766236	-0.082675	-0.0638428	0.0888809	-0.0475509	-0.0903215	-0.0358439	-0.0982307	0.00294495	-0.0694248	-0.00226363	-0.0581689	-0.00373497	-0.0668246	0.0153673	-0.074377	-0.0700268
chr1_227193786_227254155:-	-0.0106545	0.00448723	-0.0210026	0.00764658	-0.00335054	-0.0190932	-0.00225251	7.51e-05	0.0245561	-0.0275354	-0.00656284	0.0230421	4.88e-05	0.0540452	-0.0154549	-0.0017894	0.0376486	-0.0105139	-0.00296377	0.0225981	0.0167133	0.0430724	0.0182774	-0.0240764	-0.0125933	-0.0253682	-0.0162868	-0.000236557	-0.00829095	-0.018951	0.00395507	-0.0216058	0.0132656	-0.0113083	-0.0145479	-0.00331119	-0.00764511	0.0420927	0.0491975	-0.000104081	-0.0258243	-0.0255902	-0.0300962	0.0282944	0.0372853	-0.0254461	-0.0219263	0.0633084	-0.024814
chr1_23030469_23050520:+	-0.0375302	-0.0200422	-0.0554041	-0.00456612	0.00359015	-0.0552135	0.00100832	-0.0339473	0.00427212	-0.0485454	-0.0267198	-0.00732062	-0.0111732	0.0567066	-0.053194	-0.0123589	0.0288653	0.0149626	0.0271198	-0.0305116	0.00847675	0.00409603	0.0415844	-0.0358427	0.0384961	0.0187993	-0.0499021	-0.00592077	-0.0237495	-0.0433131	-0.0724376	-0.0155348	-0.0478838	-0.0684392	-0.055851	0.00342108	-0.0533127	0.0453554	0.0206368	-0.0240133	-0.000851857	-0.0211888	-0.0149872	-0.010969	-0.00662537	-0.0341282	0.0344232	-0.0163069	-0.0457762
chr1_23050387_23059167:+	0.0123483	-0.00124328	-0.0302979	0.00490609	-0.00397082	-0.015927	-0.0181942	-0.0135603	-0.0296408	0.0194683	-0.0238707	0.0206064	-0.0114735	0.019136	0.00745096	-0.0359241	-0.0231598	0.017146	-0.0219112	0.0166171	0.00643157	-0.0374546	0.0307436	-0.0348422	-0.0126761	0.0161613	0.0415682	-0.0187318	-0.032117	-0.00738034	-0.0273968	0.0208364	-0.0248249	0.0136775	-0.0324802	-0.0254832	-0.0362408	-0.00362924	-0.0202406	-0.0142473	-0.0136655	0.00544905	-0.0137157	0.00979453	-0.0260249	-0.0181869	-0.0179877	0.0138704	-0.0328854
chr1_230663141_230675124:+	-0.0337223	-0.0273218	-0.0109295	-0.00543914	-0.0347175	0.0160196	-0.0412344	-0.0404155	-0.036863	-0.0424505	-0.0402043	-0.0156163	-0.0286316	-0.0247676	-0.0153727	0.00169663	-0.0250894	-0.00590043	-0.00358198	-0.0289673	-0.058165	-0.0313336	-0.0206575	-0.0375984	-0.0361873	-0.0356311	0.00471172	-0.033376	-0.0318523	0.025161	0.0244078	-0.0159203	0.00709363	0.00340917	-0.0369047	-0.0396897	0.00087071	-0.025156	-0.0279059	-0.0157848	-0.019898	-0.0262473	-0.0259864	0.00934769	-0.0169061	-0.033395	-0.00952551	0.0176955	0.00619563
chr1_230943806_230961303:-	-0.02771	-0.00816045	-0.0142588	-0.0234465	-0.016922	-0.0263732	-0.0191151	-0.0207732	-0.0238102	-0.0247162	-0.0199669	-0.00586965	-0.00178843	-0.0240472	-0.0282347	-0.0186763	0.0513684	0.00616646	-0.00139007	0.00435343	-0.0262145	-0.0109628	0.0155195	-0.016276	-0.0197161	-0.0193472	-0.00750229	0.0127235	-0.0268383	-0.0131051	0.0100414	0.0105955	0.00723222	-0.00489497	-0.0175048	-0.0196992	-0.0236611	0.000432426	0.0155346	-0.0239321	-0.0189609	-0.0210818	0.010081	-0.00612358	-0.00509215	0.00644581	-0.0103394	-0.0247177	0.0115492
chr1_230954333_230961303:-	0.0168033	0.0231564	0.0094557	-0.0188792	-0.0479964	-0.0437393	-0.00539577	-0.0167152	0.0240393	-0.010695	-0.0143016	-0.0465664	-0.037056	0.00802816	-0.0187913	-0.0317153	-0.0387958	0.00763895	-0.0619883	-0.0497319	-0.0413374	0.0430431	-0.00918797	0.0112003	-0.0175824	-0.0449228	-0.00885813	-0.0376116	0.00511882	0.007018	-0.0311474	-0.0452243	-0.044152	-0.0454417	-0.024774	0.00666715	-0.0260087	-0.0157025	-0.0184139	0.0239439	-0.0520588	-0.0438088	-0.0101093	-0.0407274	-0.0414435	-0.0145224	0.00393291	-0.0402674	-0.0512802
chr1_233135013_233208689:-	-0.0217902	0.0240659	-0.0161956	-0.000931109	-0.0135707	-0.00539025	-0.00620332	-0.0103453	-0.00729777	-0.0166387	-0.000824924	-0.00423848	-0.0116027	0.00142876	-0.0127541	-0.0146693	0.0228292	0.0385149	-0.0180624	-0.00958004	-0.0140688	0.00284996	0.00582785	-0.00389195	0.0211474	0.0130426	0.00783365	0.00156364	0.0307097	-0.0135478	-0.00961032	0.0120558	0.00638025	0.00846966	-0.0140423	-0.0190519	0.0157961	0.0236882	-0.00209667	-0.0137627	-0.014592	-0.00124685	-0.0128914	-0.0153642	-0.00381137	-0.000340383	-0.0111752	-0.0110935	-0.0219444
chr1_233135013_233236980:-	-0.0272901	-0.0159133	-0.0115395	0.0104772	-0.00861347	0.0547809	0.0208301	-0.0152295	0.0194171	-0.000136933	-0.0190641	-0.0101543	-0.00343058	-0.00186862	-0.00920632	0.00699351	-0.0187079	-0.0110179	0.00344911	-0.0150607	0.0490928	-0.00167634	0.0077345	-0.00732544	0.00413636	-0.00357005	0.00417792	-0.0136659	-0.0159493	-0.0161312	-0.01477	6.41e-05	-0.0251451	0.0310673	0.0284219	-0.0248204	-0.00450668	-0.0268508	0.0199762	-0.0200039	0.0190989	-0.00626965	0.0375518	0.00473307	0.0372995	-0.0189017	-0.014767	-0.0190821	-0.0190011
chr1_233198939_233236980:-	0.0625857	0.0270168	-0.00742893	-0.0224789	-0.00462496	0.0277509	-0.0102216	0.0076334	-0.0121407	0.0211657	-0.0251931	-0.0114722	0.0136049	0.0403655	-0.0223234	0.0371371	0.073701	0.0360596	-0.0108902	-0.00023609	-0.0033178	-0.00419954	0.0315661	-0.0135157	0.0196213	0.00221879	-0.00660663	-0.0167689	-0.0191322	-0.014996	-0.0244394	-0.00810393	0.00301164	-0.029925	0.0293058	-0.0160033	-0.0156482	0.00555428	0.0225306	0.00369527	0.019105	0.0096208	0.0191457	-0.00916367	0.0289797	0.00895876	0.00936291	-0.018258	0.0162949
chr1_233198939_233252788:-	0.0349757	0.0224392	0.00642353	0.0505964	0.00467011	0.016652	0.0161584	0.0220119	0.00581527	0.0469072	0.00590185	0.0287691	0.0205174	0.0821268	0.00458099	0.00412363	0.00655698	0.00464245	0.00674014	0.0104715	0.0268952	0.00936589	0.0371867	0.0161181	0.0433874	0.04175	0.00437759	0.00358869	0.00680611	0.0427025	0.0104222	0.0311425	0.00566762	0.00995493	0.0505923	0.0460827	0.0227022	0.0263872	0.00428237	0.00839368	0.0264666	0.00609201	0.00773755	0.00628392	0.0217983	0.00273595	0.00350091	0.0224864	0.00458513
chr1_233217899_233227371:-	0.0478762	-0.00952229	-0.00941713	-0.00460957	-0.00460143	-0.00841842	0.00262225	-0.00363621	-0.0195	-0.0188396	-0.00612362	0.000365975	-0.000906414	-0.00125968	-0.0284562	-0.0139783	-0.020509	-0.00605026	-0.00621271	0.00339919	-0.00347668	-0.00289576	-0.0147845	-0.0169936	-0.016762	-0.0136728	0.0232171	-0.00433741	0.0716749	-0.0137742	-0.0191309	-0.0192081	-0.019634	0.0280179	-0.00265045	-0.0130924	0.000990078	0.00779925	0.0375989	-0.013892	-0.0132684	-0.0138979	0.00101554	0.0118581	0.0196205	0.00845865	-0.00490025	0.00952481	-0.0297412
chr1_240868587_240870119:-	-0.0236995	-0.0362293	-0.0287847	-0.0223628	-0.0248006	-0.0329025	-0.0424171	-0.0336562	-0.0213605	-0.00511176	-0.0239461	-0.0281271	-0.0367554	-0.0416594	-0.0106161	0.00342101	-0.0178835	0.0604505	-0.0137885	-0.0160559	0.00734507	-0.00392397	0.000747097	-0.0268399	-0.0278296	-0.0118765	0.0413999	-0.0285542	-0.0109424	-0.0417626	-0.0356394	-0.0363406	0.0318225	-0.0475774	-0.038394	-0.0372879	0.0209356	-0.0378808	0.00313375	-0.0346783	-0.0019383	-0.0125131	-0.0129516	0.0108161	-0.0400899	0.00198138	-0.0250372	-0.0435759	-0.0155946
chr1_243316755_243426558:+	-0.0206289	-0.00899459	-0.01878	-0.00198335	-0.000391037	-0.0193579	0.00431505	-0.00377364	0.0147247	0.00268692	0.0125677	-0.0117654	-0.0158036	-0.0176452	-0.0189569	0.0351494	0.018009	-0.00215444	-0.0155314	-0.0194211	0.0292523	0.0313522	-0.00828633	-0.0163301	-0.00703131	-0.00312198	0.0334793	0.00335533	0.00622103	0.00866782	-0.0202276	-0.00625419	-0.0146468	-0.0231502	-0.0157622	0.0419741	-0.0193905	-0.0150004	-0.0165806	0.0222473	0.00362736	-0.0172587	-0.0178595	0.050039	0.0164378	0.000200932	-0.00874076	0.000263063	-0.0194932
chr1_243415702_243426558:+	-0.030038	0.0529619	-0.00711035	-0.0248315	0.00809191	0.128567	0.0204794	0.0191896	0.0267919	0.0414329	0.0149187	0.0608015	0.038693	0.112385	0.0121373	-0.00848635	-0.00145743	0.0580843	0.0121868	0.0119211	0.103863	0.0744369	0.0658727	0.0224315	0.0371473	-0.00143932	0.120171	0.0312785	-0.00141323	0.00695432	0.000399504	0.0991003	0.0936148	-0.0215517	-0.0012351	0.0214409	-0.00258059	0.133674	0.0652936	0.0827742	0.033478	0.0293669	0.0210479	0.00804884	0.0748397	0.0530924	-0.00713222	0.0295356	0.0183658
chr1_243545510_243573048:-	-0.0599876	0.169873	-0.0855595	0.0525257	-0.0188046	-0.00675535	0.0420835	-0.101933	-0.0606566	0.0350999	-0.0376249	0.0219066	0.0802628	0.0299816	0.0174162	-0.0509778	-0.00870749	0.0502767	-0.033209	0.0454162	0.222445	-0.0093163	-0.227681	-0.166319	0.0684081	-0.0677431	0.105918	-0.0111602	0.016429	-0.00217153	-0.156787	0.169922	0.0662477	0.0578392	0.0173348	-0.0106652	-0.138777	0.0588157	-0.0822195	0.0807885	0.034707	-0.0845822	0.187745	-0.0271048	-0.0885054	-0.0221383	-0.0256994	-0.0354995	-0.042974
chr1_243545510_243695716:-	0.0506366	0.0732262	-0.0119618	0.0310084	0.014791	0.0154369	-0.0314079	-0.022082	0.012172	0.0546386	-0.00768194	0.0217275	0.0187899	0.166524	-0.0158872	0.0316396	0.00557348	-0.0431113	-0.0180639	-0.0255228	0.236602	0.0461372	-0.0402947	0.03836	0.036121	0.00234205	0.0595209	0.00819587	0.000449053	-0.0071872	-0.0461321	0.115598	0.12764	-0.0371336	-0.0403984	-0.00813837	0.0248388	0.0415301	-0.0425512	-0.0432809	0.00466257	-0.0160653	0.0348132	0.000599841	0.00858887	-0.016228	-0.0177141	-0.0435095	-0.0177553
chr1_243545510_243843282:-	0.35941	0.571084	0.161728	0.167332	0.3714	0.200378	0.468695	0.16751	0.545688	0.579097	0.38453	0.564517	0.541533	0.145627	0.164891	0.0994022	0.176527	0.182535	0.193485	0.4474	1.35507	0.152902	0.167608	0.669411	0.166082	0.0975602	0.118302	0.398631	0.504799	0.361824	0.366011	0.124901	0.777411	0.400712	0.313302	0.713857	0.192981	0.105791	0.1588	0.653045	0.583852	0.40319	0.611732	0.190411	0.601229	0.284197	0.207802	0.233615	0.141011
chr1_243552729_243843282:-	-0.0481189	0.0292289	-0.0220263	0.00742319	-0.033975	-0.047313	-0.0318415	-0.0409991	-0.0105695	-0.0722322	-0.0447355	-0.0277642	-0.0537167	-0.0245636	-0.0371253	0.0655826	0.0123442	0.0204587	-0.0128179	0.0165011	0.000363429	-0.0316461	0.0453783	-0.0541401	0.00667623	-0.0160272	0.0370372	-0.0171157	0.00992787	-0.0407484	-0.0664701	-0.0246125	-0.0317999	-0.0246401	-0.0481051	-0.0280278	-0.0255253	0.0405473	-0.0411179	0.0165519	-0.00932396	-0.0389446	-0.04122	0.0185835	0.087462	-0.0434534	-0.0391218	-0.0118366	-0.0336226
chr1_243563720_243695716:-	0.0136335	-0.000443336	-0.00019696	0.0182019	-0.00259911	0.0269989	0.00274766	0.00446886	0.0127161	0.00403334	0.0157137	0.0108225	0.0155143	0.03834	0.00546515	0.0036331	0.0745999	0.0171379	0.000675919	0.0048088	0.0531983	-0.00629214	0.0104775	0.0111261	0.0347177	0.00747288	0.0373128	0.00812223	0.0225123	0.000266609	0.00450271	0.016357	0.01573	-0.0125237	0.0284749	0.0726053	0.0317118	-0.00663191	0.00137868	0.0024809	0.0640904	0.00177502	0.00766394	0.0797353	0.0136633	0.00757388	0.00270192	0.018559	0.0175739
chr1_243563720_243843282:-	0.0413794	0.0678608	0.00646027	0.0885329	0.0353147	0.0853187	0.11134	0.00954013	-0.0166819	0.0888161	0.0250781	0.0640074	-0.0188012	-0.0228772	0.0806334	-0.00993866	-0.0142129	-0.0220875	-0.0161383	0.0799387	0.165446	0.0195271	0.0122021	0.0938125	-0.00440758	0.0633747	0.112913	0.0112895	0.00626968	0.0654155	0.061703	-0.0205827	0.0505613	-0.00342404	0.0157023	-0.0198811	-0.00670335	-0.0324502	0.151025	-0.00861108	-0.0126877	-0.0138849	-0.00399006	0.0606644	0.213502	0.035139	0.0281429	0.076869	0.0729258
chr1_243613671_243695716:-	0.0388888	0.0334646	-0.0657121	0.00619351	-0.0476045	0.00566763	-0.0420301	-0.0393727	-0.0499807	0.166812	-0.0158652	-0.000361311	0.0739696	0.0594566	-0.0614669	-0.053967	0.0640226	-0.0206007	0.013644	-0.0300236	-0.0128456	-0.0599431	0.0425284	0.0276114	0.0155408	0.0147837	0.0915378	0.0464584	0.0277268	0.069783	-0.0203887	0.00693697	0.0426056	0.0526628	-0.0505512	-0.00813922	-0.0472696	-0.0376827	-0.0602295	-0.0298418	0.0635605	-0.0251953	-0.0713023	0.0369675	0.00901077	-0.00555902	-0.0103555	-0.0176255	-0.036567
chr1_243613671_243843282:-	-0.122737	-0.11131	-0.0686758	0.138248	-0.018262	-0.21812	-0.106812	-0.0524144	-0.0252282	0.0524283	-0.0111369	0.0297785	0.0602273	0.0603842	-0.109148	0.269847	-0.179915	0.00869127	-0.067415	-0.0683793	-0.199928	-0.172069	-0.222898	0.11351	-0.0186703	-0.183095	-0.13235	0.0515323	0.137996	-0.00565886	-0.170452	0.0535145	0.0588813	-0.198801	-0.144184	-0.155715	0.127363	0.0495556	-0.0452993	0.064234	-0.010728	-0.174583	0.0432793	0.0801627	-0.185511	-0.190539	-0.00433806	0.0104367	-0.01326
chr1_243645893_243843282:-	-0.00160104	0.000859541	-0.00107157	0.0343536	0.00135906	0.0125415	0.0346008	0.0133239	0.00389413	0.00284469	0.00448354	0.0199182	0.0123849	0.0217409	0.0289549	0.00116584	0.0182636	0.00542572	0.00426128	0.0762991	0.0145205	-0.00536116	0.015781	0.0358089	0.00840057	0.0393102	0.0162256	0.00585281	-0.00101964	0.0227999	-0.000299881	0.0387523	-0.00118727	0.0207208	0.0304462	0.0919814	0.0095658	0.205831	-0.000721924	-0.00389063	0.059781	-0.00238307	0.0201079	0.00229309	-0.00235144	-0.0019217	-0.000739011	0.026393	0.000387639
chr1_245915530_245929937:-	0.0080151	-0.00423825	0.000588509	0.0461749	0.000311056	-0.00696306	-0.0135791	-0.000548862	-0.0178157	-0.0145532	0.0126553	0.0148595	-0.00422708	0.0256093	-0.00687918	-0.0101273	0.0403243	0.014313	-0.0142898	-0.0189992	-0.0020033	0.000971623	0.0293291	0.00251552	-0.0141135	-0.00087859	0.0165672	-0.00555027	-0.00266069	0.0305171	-0.0198742	0.0066737	-0.00554413	0.00965686	0.00146567	-0.00571932	0.00433853	-0.0025296	-0.00835997	-0.0108388	0.0115091	0.00477052	-0.00910917	0.017607	-0.00350749	-0.00375738	-0.00211278	-0.000213189	0.00137612
chr1_26257597_26259802:+	-0.0088003	-0.00270006	0.0126277	-0.0065839	-0.00733009	0.0443772	0.00365727	0.0133511	0.00270549	0.01479	-0.00924683	0.00498484	0.013216	-0.00511245	-0.00492234	0.0482118	0.0121158	0.00694929	0.0163783	-0.00879908	0.0263179	0.0294395	-0.00396595	0.00842805	0.0288646	-0.00145156	-0.00478876	-0.00178649	-0.00122823	0.0359127	0.00694005	0.00436645	0.0258454	-0.00514203	0.0253897	-0.00384365	-0.00646214	0.0202576	-0.00552611	0.0751507	0.0121162	0.00680946	0.00665453	0.0165932	0.0121343	0.0157831	0.0337944	-0.00824686	-0.00254536
chr1_26446316_26447660:+	-0.00765972	-0.0220888	-0.1081	-0.120839	-0.0360229	-0.0641814	-0.0766709	-0.0571569	-0.0467453	-0.113478	-0.0779524	-0.0520677	-0.0577544	-0.030341	-0.0295375	-0.0463544	-0.0479084	-0.0405641	-0.0767519	-0.0442956	-0.038781	0.0135224	0.0142644	-0.0295809	-0.0745194	-0.102073	-0.0488615	-0.065456	-0.00564132	-0.074554	-0.0750321	-0.0391851	-0.0316278	0.00762154	-0.0597254	-0.0412518	-0.0753681	-0.0469901	-0.0387101	-0.0796124	0.015577	-0.0960031	-0.0715904	-0.0564382	-0.071309	-0.0859135	-0.0140354	-0.0974408	-0.0296701
chr1_26729651_26732792:+	0.0325603	-0.0264712	-0.00850362	0.00149898	-0.00345353	-0.0211546	-0.00605829	-0.0178623	-0.0140677	0.0030671	-0.0278392	-0.00787941	0.0062829	-0.00390339	0.00827998	-0.0190938	0.0171916	0.00219025	-0.00352578	0.0101867	-0.00394121	0.00321074	-0.00343782	-0.0191317	-0.020195	-0.00342746	-0.0140935	-0.0220437	0.00926947	0.0052368	-0.0213836	-0.00339301	0.0282594	-0.0183756	-0.00673224	-0.0177463	-0.000561972	-0.0110006	-0.0073697	-0.00919521	0.00201679	-0.0203289	0.0206733	-0.00227841	0.00537701	0.0457817	0.0219952	0.00883297	-0.00818297
chr1_32948222_32949774:-	-0.0101005	-0.0130041	-0.0112316	-0.00441275	-0.00690029	-0.00789711	0.00530932	-0.00850114	-0.00855412	0.00395962	0.0420917	-0.0152554	0.0164019	0.0406407	-0.018807	-0.0191209	0.00304296	-0.0154278	-0.0116262	-0.0101751	-1.71e-05	0.025998	-0.00846178	0.00556663	-0.00618359	0.0224742	-0.0092349	0.0258138	0.0128846	-0.0164399	-0.0232929	0.0310009	-0.00790203	-0.0093501	-0.00239774	-0.0128611	-0.0032112	-0.00987998	-0.0170653	-0.0146789	-0.0148081	-0.015948	-0.00732529	-0.0152313	0.00531138	0.0111699	-0.00920351	0.0126452	-0.00734034
chr1_33294937_33295305:+	-0.00813714	0.0195469	0.0180434	-0.0081801	-0.00296466	0.0248864	0.0073532	0.0145593	0.0406315	-0.00266799	0.0388147	0.0140625	0.00972508	-0.00649569	0.00587143	-0.000781443	-0.00363799	0.0692513	-0.00346105	0.00240452	0.0171597	0.0317485	0.0144272	0.0338738	0.00495556	0.00402826	-0.00232302	0.0268583	0.0295098	0.0159965	0.00127045	0.00468239	-0.00692179	0.0199467	0.00131954	0.0405557	0.00610219	0.0226299	0.028248	0.00260342	0.00284776	0.0308872	0.0206649	0.0124159	0.0135764	0.0355554	0.00782173	0.00967759	0.0020305
chr1_35358925_35361789:+	-0.219339	-0.210087	-0.29518	-0.198379	-0.184157	-0.179695	-0.170069	-0.20313	-0.190351	-0.186283	-0.208061	-0.186793	-0.199968	-0.0109974	-0.0808865	-0.154548	-0.117956	-0.098929	-0.216191	-0.184856	-0.130687	-0.0800455	-0.192499	-0.128476	-0.159183	-0.164581	-0.161582	-0.0292843	-0.055813	-0.158869	-0.24906	-0.183143	-0.218816	-0.173889	-0.158704	-0.0796833	-0.202637	0.0272886	-0.203636	-0.129218	-0.0809133	-0.177731	-0.164013	-0.147316	-0.185565	-0.128423	-0.112341	-0.155777	-0.188857
chr1_35381259_35389082:+	-0.212137	-0.201225	-0.242656	-0.229373	-0.182243	-0.229684	-0.244936	-0.23141	-0.227809	-0.222058	-0.269722	-0.210552	-0.233673	-0.193345	-0.173912	-0.144587	-0.24717	-0.267071	-0.240284	-0.121144	-0.143841	-0.209743	-0.132186	-0.167544	-0.197311	-0.182278	-0.171133	-0.191934	-0.228425	-0.193085	-0.255212	-0.119319	-0.199468	-0.198216	-0.234737	-0.252881	-0.216559	-0.23623	-0.257825	-0.233932	-0.242326	-0.2356	-0.188121	-0.228839	-0.157188	-0.215859	-0.178566	-0.195596	-0.219549
chr1_36361221_36362656:-	0.0338523	0.0889454	0.0107093	0.0834708	0.0189143	0.0253071	0.0424354	0.00304259	0.0319297	0.0168279	0.04569	0.0650013	0.0319524	0.058032	-0.00378501	0.00173343	0.0735293	0.0748224	0.0317169	0.0216303	0.0328048	0.0612991	0.0203803	0.0138613	0.0508503	0.0141111	0.0624344	0.0731453	0.0600736	0.0498555	0.0210099	0.0388578	0.0221517	0.0937543	0.0207019	0.00143283	0.0477361	0.115592	0.0301186	0.0322159	0.0106024	0.056094	0.0567357	0.0588568	0.0482199	0.0335408	0.0182167	0.0314433	0.00081526
chr1_40189055_40202614:+	0.0137957	0.0336514	0.0140708	0.145468	0.00200183	0.0456011	-0.0616132	-0.0336668	-0.0165336	0.0542584	0.001622	0.0588109	0.123999	0.114065	0.0254358	-0.0332059	0.0363284	0.127469	0.00764733	0.0213032	0.0998963	0.0454065	0.135474	0.10178	0.00401538	0.00597379	0.122118	-0.0570236	0.0557123	0.103567	0.0149829	0.095471	0.14372	0.0810658	0.0379561	0.030217	0.0141516	0.0703521	0.016746	0.0147762	0.0109692	-0.00722791	0.030892	0.0294572	0.108711	-0.0262294	0.00758825	0.0488893	-0.0317247
chr1_41070595_41075451:-	0.0712328	-0.0100782	0.00501509	0.01559	-0.00577393	0.0733318	0.00401268	-0.0307915	0.0203414	-0.0354489	-0.0184981	-0.0416598	0.035091	0.0791673	-0.00117464	0.0207784	0.0113557	-0.0259565	-0.0115709	-0.00757302	0.119587	0.0304436	0.0485688	0.10289	-0.0154868	0.0240672	0.0840191	-0.00428791	0.0409118	0.0606465	-0.00223972	0.0259631	0.0309718	-0.00191083	0.00783451	0.0155355	-0.00782665	0.0700115	0.00495269	0.0182192	-0.0167508	-0.00443326	0.0176416	-0.0053971	0.0205443	0.0449546	-0.00489325	0.0243241	0.00218357
chr1_42265115_42278672:-	0.0138217	0.0493847	0.0297208	0.00839956	0.0203934	0.00555991	0.0139221	0.0219293	0.0202192	0.00609202	0.0126542	0.0288985	0.0218082	0.0425324	0.0019058	0.00695774	0.0210372	0.0371627	0.0115117	0.04685	0.0349095	0.00814335	0.0158251	0.0328173	0.0314461	0.00748975	0.0425718	0.038916	0.00489806	0.0708325	0.0428053	0.00969169	0.0165138	0.0340499	0.0235829	0.0324825	0.00356086	0.0342465	0.00666615	0.0469422	0.00794034	0.0219738	0.00729001	0.0225873	0.0292359	0.0125029	0.0101213	0.0355961	0.0305255
chr1_44308310_44319744:-	0.0276587	0.0112354	-0.0207438	-0.0360258	-0.0161497	-0.0345876	0.0123122	-0.00986166	-0.0318184	-0.0178024	-0.0089324	-0.0281852	0.0063248	0.0454338	0.00797306	-0.0233099	-0.0101714	-0.00197651	-0.000723102	0.00158752	-0.0123062	-0.00854409	0.0342219	-0.0175631	-0.0180541	-0.0470604	-0.0260765	0.0190181	-0.0156779	-0.00743851	-0.0069647	0.0353001	-0.00486115	-0.0441873	0.00472104	-0.036557	-0.03123	-0.046476	0.0163884	-0.049534	-0.0631096	-0.00418082	-0.0068248	-0.00426354	-0.0461969	-0.0112549	-0.026336	-0.0161296	-0.050963
chr1_44308310_44339322:-	0.0542736	-0.0352428	0.0156926	-0.00856203	-0.0149822	-0.00556157	-0.00794632	-0.0124483	-0.039053	-0.0238412	-0.0372442	-0.0303509	-0.000544392	-0.000779247	-0.0329963	0.00925672	-0.0230651	-0.0261451	-0.0245224	-0.0027099	-0.0115039	0.00559545	0.0527667	-0.00879214	-0.0189813	-0.00272538	0.0202041	-0.0350646	-0.0375589	0.00457315	-0.0244839	-0.00559206	-0.0188817	-0.0216468	0.00928277	-0.0312172	-0.0359358	-0.0068148	-0.0178391	-0.0361017	-0.036605	-0.0306468	0.0185435	-0.0350461	-0.0235689	-0.00254081	-0.00925561	-0.0230893	0.0176002
chr1_45087881_45088237:-	-0.0463752	-0.0718262	-0.0871603	-0.0723203	-0.0781592	-0.0796938	-0.0835281	-0.0719294	-0.0529374	-0.102742	-0.112999	-0.0725571	-0.0574538	-0.00187035	-0.0782068	-0.0836778	-0.0600824	-0.0588644	-0.120932	-0.0963506	-0.108655	-0.0688866	-0.0448998	-0.0639118	-0.0358593	-0.0796559	-0.0564049	-0.0719557	-0.0630607	-0.0800701	-0.110822	-0.0387168	-0.0533004	-0.0394464	-0.088561	-0.0844254	-0.0814436	-0.019006	-0.0547931	-0.0878321	-0.0508229	-0.085328	-0.0390617	-0.0780787	-0.0380156	-0.0579355	-0.0675027	-0.076862	-0.0892872
chr1_48355670_48359770:-	-0.00147747	0.0426153	-0.0118577	-0.0284204	0.00348947	0.0100368	-0.0312228	-0.0106993	0.0079922	0.0325201	-0.0093404	-0.0044256	-0.0152641	0.0137866	0.000346146	-0.0208278	0.017565	-0.0084812	0.0125064	-0.00798078	0.0328721	0.0086606	0.0494206	0.0172328	0.000464416	-0.0149087	-0.00840409	-0.0275108	0.00499065	-0.0208504	-0.0369549	0.0298972	0.00300762	0.0298815	-0.0200462	-0.00790831	-0.016757	-0.0151681	-0.0146539	-0.0197742	-0.0267457	-0.0216223	0.0222091	-0.0247954	-0.00832238	0.013592	-0.0184963	-0.0138381	-0.00695591
chr1_50655442_50744775:-	0.00749846	0.00163876	-0.00446162	-0.00311164	0.0234362	0.0154682	0.0607416	0.00136813	0.0300181	0.0145841	0.0162865	0.00412606	0.0131888	-0.00455631	-0.00465076	0.117406	0.0705065	-0.00106361	0.00500235	-0.00366705	-0.00524239	0.0498749	-0.00680105	-0.00542467	0.00824548	-0.00382975	0.0399357	0.0309354	0.0726544	0.0197092	0.0128317	-0.00204796	0.00568077	0.000160867	0.0131583	-0.00341349	0.00525016	0.0430861	-0.00799498	0.0340754	0.0151468	0.00530655	0.0448243	0.000720738	0.0276415	-0.00419331	0.0126617	0.04358	0.0231377
chr1_51402435_51408332:-	0.0210963	0.0345231	-0.000176346	0.0141183	0.0734158	-0.032113	0.0143865	0.0326365	0.00256317	0.0397872	0.0357083	-0.00941287	0.0439886	0.0616392	0.0531303	0.0275782	0.0194847	0.0389158	0.00803901	0.100029	0.133232	0.0443499	0.0619563	0.0350314	0.00879693	0.00132066	0.0145986	-0.021818	0.107244	0.077777	0.0319872	0.0703522	-0.0078155	-0.000902438	0.0320886	0.0135093	0.0445869	-0.000782248	0.00230971	0.0513794	0.00324699	0.0408552	0.0155278	-0.00710038	0.0544414	0.0475184	0.0442712	0.0129463	0.0194
chr1_51405905_51408332:-	-0.00795326	-0.0296793	-0.0273803	0.0075122	-0.0263122	-0.0109462	-0.0268744	-0.0327122	-0.0272867	-0.00413286	-0.0387681	-0.0295793	-0.00346495	-0.0440316	-0.0406842	-0.0181782	0.0299295	-0.0412047	-0.033987	-0.0192733	0.0178313	-0.0216242	-0.026854	-0.02659	-0.0159924	-0.0393623	0.01007	-0.031868	-0.0340521	0.00556217	-0.0225605	-0.0275427	-0.0322493	-0.0396757	-0.0363135	-0.0151563	-0.0408481	-0.00702121	-0.037801	-0.0170115	-0.0166754	-0.0373235	-0.0312311	-0.0349875	-5.39e-05	-0.0210439	-0.0218711	-0.0417913	-0.0340305
chr1_51827796_51834170:-	0.0210725	0.0295939	0.0100066	0.0236622	0.0344693	0.0345026	0.0289213	0.0135833	0.0467531	0.0264057	0.0230409	0.0327256	0.015023	0.0269767	0.00903783	0.00557018	0.0452077	0.00567193	0.0227836	0.0262338	0.00708657	0.0184973	0.0496099	0.0215073	0.0672402	0.0190167	0.0274983	0.0242028	0.0177573	0.0289241	0.041872	0.00946135	0.02351	0.0205112	0.00922442	0.0175772	0.0515205	0.0146942	0.0337738	0.0291907	0.0450415	0.0218325	0.0156835	0.00753232	0.0606533	0.0173398	0.0244774	0.037086	0.0709278
chr1_52493611_52509712:-	-0.0727715	-0.0419812	-0.0719578	-0.0623411	-0.0612609	-0.0331467	-0.0659367	-0.0881663	-0.0353963	-0.0834773	-0.0887068	-0.0553791	-0.0590896	-0.0606105	-0.0401957	-0.0168401	-0.0272356	-0.0823542	-0.0807617	-0.0553562	0.0438748	-0.0758701	-0.0105849	-0.0363313	-0.0704829	-0.0638635	-0.0360177	-0.0554188	0.002945	-0.0162535	-0.0950422	-0.00257246	0.0163277	-0.048618	-0.0563072	-0.00936885	-0.0823598	-0.0445402	-0.0817253	-0.0635988	-0.0532875	-0.07028	-0.0472998	-0.0493695	-0.00886458	-0.0651765	-0.048755	-0.0433266	-0.00380558
chr1_52515891_52526373:-	-0.00390499	-0.0249173	-0.0160131	-0.0279448	-0.024658	-0.0303116	-0.0356296	-0.0380412	-0.0207459	-0.0244547	0.0103189	-0.0153612	-0.0322827	-0.0406548	-0.0286245	-0.0381426	-0.0185443	-0.0164358	-0.041795	-0.0419878	-0.0378518	-0.00426604	-0.00374545	-0.00437068	-0.0328753	-0.0321612	-0.0161707	-0.0271102	0.0724514	-0.0140112	-0.0430619	-0.0292293	0.0415267	-0.0485615	-0.0333696	-0.0443545	-0.039785	-0.050224	-0.0459306	-0.0202557	-0.0245286	-0.0307946	-0.0235115	-0.0270659	0.0164109	-0.00847544	-0.0353335	0.0102395	-0.0483717
chr1_59321536_59346398:+	0.0671222	0.0290689	0.0247385	0.0165345	-0.00156974	0.0124508	-0.00961856	0.00617735	0.0129429	-0.0119253	0.0279738	0.00478464	0.0286315	0.00105389	0.00208254	-0.0286663	-0.0183504	-0.0038889	-0.0157158	0.00626456	0.0634349	0.0182444	0.0478549	-0.0122464	0.00501542	0.0281627	0.0537126	-0.00283103	0.0304557	0.012471	0.0336872	0.0236282	0.0317371	-0.0158505	-0.0169626	0.0130872	0.0339118	0.0155666	0.0302139	0.0101777	-0.0202299	0.017227	-0.000876849	0.0191356	-0.0181597	0.0472891	-0.0199983	0.0309659	0.0114381
chr1_59339958_59378837:+	0.0326069	0.000757216	-0.0434187	-0.0168503	0.0361689	-0.0265499	-0.0279824	-0.00323177	0.0580423	0.0145422	-0.0321097	-0.0370011	0.00219887	-0.000562052	0.00958922	0.0197124	0.0811159	-0.0379374	-0.0407255	-0.012035	-0.020268	0.0834875	0.0636852	0.0231697	0.0126222	0.0225432	0.0500304	-0.0190819	0.033816	-0.0131863	-0.0141505	0.0331482	0.033599	-0.0235068	0.0231569	-0.030085	0.0107586	-0.0202087	-0.0207254	0.0193964	0.0517947	-0.0261046	-0.00369556	0.0631996	-0.0402307	0.0040371	0.0502248	-0.00866228	-0.0147492
chr1_65364635_65366196:+	0.0210581	-0.0335467	-0.0613799	-0.032228	0.0587242	-0.0225041	-0.0621624	-0.0382288	-0.0858045	0.0747555	0.0511562	-0.040269	-0.0528066	-0.0117797	0.010722	-0.0762135	0.0105364	0.0465722	-0.0434906	0.118574	-0.0338891	0.154363	-0.0140077	-0.0207806	0.0119742	-0.0973769	-0.0660136	0.0750497	-0.0923594	0.00129095	-0.0215951	0.0192235	0.0309747	0.0571052	-0.0689107	0.00032194	-0.0542592	-0.00465471	0.0342408	0.0670568	0.0020325	-0.0193341	-0.0827802	0.010727	0.0111944	0.035027	0.0641105	-0.101719	0.0162039
chr1_65913245_65918835:+	-0.159344	-0.0890405	-0.121272	-0.203232	-0.125746	-0.0914313	0.042626	-0.093719	0.0483109	-0.108474	-0.0788642	0.155387	-0.0672271	-0.156949	-0.141308	-0.0878957	-0.0124047	0.241962	-0.0554335	-0.0664193	-0.0155124	0.019135	-0.0313058	-0.0785053	-0.0429794	-0.148809	-0.0214395	0.0683055	0.158611	-0.0483942	-0.111068	-0.156333	-0.245132	-0.131817	-0.135698	0.143109	0.00152126	0.200315	-0.0985664	0.101453	-0.150871	-0.102332	-0.113071	-0.0436144	0.0507413	-0.121768	-0.120165	-0.044006	-0.275294
chr1_66891154_66905375:-	-0.0338575	-0.0396696	-0.0180147	-0.0207868	-0.0234442	0.0393279	-0.0633127	-0.0271292	-0.05453	0.0100978	-0.0112203	-0.0339275	-0.00768268	0.0376072	0.0242784	-0.0231072	-0.0314283	-0.0614649	-0.0430402	0.000111674	0.015644	0.0250432	-0.0247376	-0.0389942	0.00802308	-0.0447863	-0.0464119	-0.0496274	-0.0375694	0.128193	-0.0303957	-0.0273198	-0.0286192	-0.00593859	-0.0214124	-0.0382205	-0.0395889	0.0124164	-0.0297215	-0.0470772	-0.046291	-0.0340514	-0.0175657	-0.0295882	0.00210038	-0.0180546	-0.0491305	-0.0216977	0.0264339
chr1_70053026_70089819:+	-0.0759493	-0.0669129	-0.0525167	-0.0621662	-0.0555781	-0.0656803	-0.091784	-0.0786047	-0.0511868	-0.0745193	-0.0791936	-0.0503617	-0.0677845	-0.0793215	-0.0643518	-0.00542739	-0.0383581	-0.0223109	-0.0828816	-0.0501916	-0.0389365	-0.0509346	0.00930394	-0.0567758	-0.0391014	-0.065847	-0.0532099	-0.0480001	-0.0779373	-0.0347517	-0.0562551	-0.0723973	-0.102803	-0.0718582	-0.0703103	0.0400987	-0.0780837	0.037965	-0.0864807	-0.0627668	-0.076151	-0.0853359	-0.0729648	-0.0439629	-0.00877785	-0.0616804	-0.0494735	-0.0579034	-0.0990366
chr1_70270856_70315566:-	-0.0226473	-0.0313957	-0.0378931	-0.0179136	-0.0442618	-0.0279322	-0.0498745	-0.0418169	-0.0215107	-0.0473811	-0.0307222	-0.0363871	-0.0309834	-0.00500229	-0.0384465	-0.0375367	-0.0298553	-0.0358299	0.000712159	-0.0030145	-0.0532712	-0.0415511	-0.0460919	-0.0415091	-0.0427007	-0.0324765	-0.0402139	-0.0251753	-0.0297033	-0.0340033	0.00263342	-0.0198659	-0.0366449	-0.0437499	-0.0196869	0.0244016	-0.0489321	-0.00218105	-0.0257381	-0.0534039	-0.0110209	-0.0240429	-0.037688	-0.0295331	-0.0174327	-0.0406118	-0.0315589	-0.0366192	-0.0419612
chr1_75739980_75750546:+	-0.0165795	0.071333	-0.0113573	0.0246991	-0.021501	-0.00674416	-0.0187452	-0.0168288	-0.0372603	-0.0348036	-0.025007	-0.00616053	0.00245631	-0.00991918	-0.0257956	-0.0281077	0.00762884	0.0624861	0.026137	-0.0319408	-0.0127546	0.00890176	0.0113888	-0.0276854	0.0110919	-0.0302767	-0.0251706	-0.010229	-0.0197212	-0.0273766	-0.0350152	0.00922665	-0.00306372	-0.0295372	-0.0251455	-0.0235774	0.0194277	-0.0256345	-0.027259	0.0368459	-0.0130523	-0.0131666	-0.0283696	-0.0210834	0.00355139	-0.0203994	0.0152212	-0.0300301	0.0178617
chr1_77286941_77297947:+	-0.031771	-0.0405594	-0.0202196	0.0132991	0.00188728	-0.0384383	-0.0068853	-0.0253782	0.00803667	-0.0504647	-0.0145872	-0.0184387	-0.0125802	-0.0461999	-0.0153476	0.00177012	0.103496	0.00739623	0.0160833	-0.0337556	-0.0377632	-0.00653565	-0.0197311	-0.0312739	-0.0166359	0.00632841	-0.0287954	0.0412153	-0.0437001	-0.0222898	-0.0332476	-0.0419627	-0.04581	-0.0465726	-0.0394022	0.0138868	-0.0465671	-0.0321354	-0.0169322	0.0178893	-0.0465448	-0.0440441	-0.0261124	-0.0330702	-0.0144584	-0.0369516	-0.0205173	-0.000544559	-0.0408086
chr1_77631850_77641655:-	-0.0483388	-0.0271917	-0.0318432	-0.0417726	-0.0434913	-0.0398019	-0.0599348	-0.0380505	-0.00636109	-0.0502519	-0.0612933	-0.0271313	-0.0481531	-0.0160491	-0.0422875	-0.0389632	0.0185783	-0.0414054	-0.0184717	-0.0439442	0.0101048	-0.011526	-0.0301548	-0.0332809	-0.0343256	-0.0125431	-0.034035	-0.0367661	-0.0395754	-0.0147664	-0.049184	-0.0184494	-0.0323363	-0.0478701	-0.0286502	-0.0352732	-0.0531326	-0.030376	-0.0470714	-0.0199892	-0.0291293	-0.057169	-0.0228359	-0.0257044	-0.0485752	-0.0219372	-0.0337066	-0.0394572	-0.0320638
chr1_77717867_77725762:-	-0.0592294	-0.00689756	-0.0633245	-0.0435834	-0.0627239	-0.0629632	-0.0487849	-0.0532238	-0.0140174	-0.0460813	0.083832	-0.00085236	-0.0259858	-0.0539446	-0.0415504	-0.0660762	0.0649989	0.0221226	-0.0115187	-0.0612802	-0.065116	0.0120624	-0.0457189	-0.0605808	-0.0484785	-0.0424745	-0.0318341	0.0237115	-0.00543001	-0.0628912	-0.0513397	-0.0447361	-0.0743505	-0.060421	-0.0519115	-0.0583897	0.0250585	-0.0116715	-0.00803672	-0.0444579	-0.0130337	-0.0592728	-0.0516902	-0.0184265	-0.0342745	-0.0307225	-0.0446404	-0.019204	-0.0561159
chr1_7777160_7778169:+	-0.0181251	-0.0350389	0.0208267	-0.00226465	-0.035057	0.000246444	-0.0363128	0.000749604	-0.0174753	0.0130548	-0.0298143	0.0190482	0.0149074	0.0129859	-0.00570075	0.000979682	-0.0185483	0.0141268	0.0111432	-0.0609721	-0.000962433	-0.0146679	0.0143658	0.0371525	0.0296741	0.0176477	0.0131045	-0.037802	0.0155572	0.00997948	-0.0835085	0.0392423	0.0243283	0.0219613	0.00743615	-0.021733	-0.002495	0.000481638	-0.0117054	0.0227388	-0.0380937	-0.0252124	0.0293288	-0.0273348	0.00212663	-0.00429192	-0.0488048	0.00527591	0.0392513
chr1_77801331_77815231:+	-0.0284157	0.0125456	-0.0105878	-0.0128924	0.0318819	-0.0104636	0.0151858	0.0041216	-0.00995282	0.0154443	0.0219254	0.0145836	0.0229134	0.0546088	0.0154269	-0.00159731	0.0711174	0.0359128	0.00871882	0.0289811	0.0240729	-0.0135161	0.0130376	0.0453814	0.00503913	0.0080809	0.0204872	-0.0176305	0.009582	0.047283	0.0122343	0.0207207	-0.00843237	-0.0217462	0.0155742	0.0133493	0.00574616	0.0568892	0.020374	0.0113901	0.0316003	0.00708811	0.045549	0.0111494	-0.0137761	-0.00651207	-0.00631373	-0.00491695	-0.0286272
chr1_83911165_83947282:-	0.0314399	0.0441693	0.0354463	-0.026113	0.0014461	0.0584772	-0.00683534	0.0014315	-0.0239826	0.0211972	0.0178304	0.0236478	0.00434149	-0.00438361	-0.0219876	0.0613533	0.0165592	0.0211259	0.018875	0.0538053	0.0787641	0.000820036	0.00459585	0.00605216	0.0415012	0.0076542	0.0381288	-0.0154571	0.00693702	0.0794758	-0.0200153	0.0697385	0.0254755	0.0333293	0.020025	-0.00478591	-0.000620834	0.00666222	-0.00136738	0.00519303	0.0252571	0.0398939	0.00443217	0.0167644	0.0074623	-0.00034146	-0.00306657	-0.00933927	0.0751185
chr1_84179177_84185182:+	-0.0474687	-0.0162421	-0.0532242	-0.0433875	-0.0441921	-0.0220772	-0.0676481	-0.0477562	-0.0551801	-0.0261752	-0.0683007	-0.0553498	0.0167323	0.0410107	-0.0603414	-0.0669047	-0.0796116	-0.0375554	-0.0584033	-0.0279014	-0.0561852	-0.0678867	-0.0542813	-0.0683763	-0.040153	-0.045594	-0.0397764	-0.0337126	-0.0645542	-0.0236773	-0.0421656	-0.0195857	-0.0407145	-0.0163297	-0.0469541	-0.0523756	-0.0493756	-0.0433899	-0.0416833	-0.041275	-0.0606151	-0.0368744	-0.0271175	-0.0529901	-0.0184367	-0.0472367	-0.0234533	-0.0628702	0.0123994
chr1_84179177_84197824:+	-0.00259779	-0.0187595	9.77e-05	-0.0144531	-0.00529801	-0.00340322	-0.0363264	-0.0181718	-0.0425683	-0.0280431	-0.04526	-0.0382498	-0.0249683	-0.0243816	-0.0133383	-0.0476358	-0.0264687	-0.0466469	-0.0410863	-0.0228278	-0.0450911	-0.0473884	-0.0260445	0.00733004	-0.0278797	-0.04414	-0.0313148	-0.0169707	-0.0434218	-0.0418737	-0.0407757	-0.0110391	-0.0557296	-0.0547351	-0.0375162	-0.0241882	-0.0383189	0.00448713	-0.0118655	-0.0368452	-0.0218005	-0.0237009	-0.0220771	-0.0401975	-0.0322756	-0.0411371	-0.00902493	-0.0347441	-0.0458213
chr1_84179177_84214317:+	0.0186941	0.00873656	-0.0146763	0.0031175	0.000693491	0.00581733	-0.0113457	-0.0123709	-0.00695737	0.0118065	-0.0215219	-0.0207672	0.000208898	0.00468757	-0.0328485	-0.0278303	-0.0181348	-0.0181502	-0.0199136	-0.00284677	0.000959622	0.0188649	-0.0335925	-0.005885	0.0397195	-0.0251961	-0.0193073	0.0144074	-0.013494	0.0473771	-0.0211158	0.00599048	0.0186052	0.0181941	-0.0147713	-0.0100471	0.00610103	-0.00339593	-0.0246907	-0.0231276	-0.00429939	-0.0228037	-0.00799415	0.00831087	-0.0263993	0.00679038	-0.00609488	0.00784567	0.0174649
chr1_84655832_84671308:-	-0.0248163	-0.0172078	-0.0296481	-0.0192743	-0.00632859	-0.02792	-0.00724343	-0.0247645	-0.0246875	-0.0378705	0.00193728	-0.0274081	-0.00416152	-0.0422589	-0.0287341	0.00698337	0.0706377	0.00675471	-0.043281	-0.0214076	0.0044066	-0.00230632	0.00414055	0.011707	-0.0147026	-0.0154196	-0.0230841	-0.0089577	0.111411	0.0016626	-0.024653	0.00166708	0.0247865	0.0360821	-0.019301	-0.0346242	0.00592441	-0.0462275	-0.00210785	-0.0174939	0.0384599	-0.00249033	-0.0369003	0.0644511	0.00570274	0.00799018	-0.00257985	-0.0364545	-0.0418722
chr1_8495063_8557523:-	-0.0604956	-0.0377582	-0.0563677	0.0129273	-0.0504078	-0.0338719	0.00420543	-0.113483	-0.0696192	-0.0296187	-0.050733	0.00699787	-0.0334216	-0.0376332	0.157802	0.100679	0.179554	-0.150327	-0.0197257	-0.114619	-0.0483652	-0.0343214	-0.0545979	-0.016739	-0.0403851	-0.0994127	0.0711492	-0.0520977	-0.118114	-0.0768048	-0.0620164	-0.0459881	-0.061068	-0.00877807	-0.0416287	-0.105346	0.0276636	-0.0682993	-0.0385	0.00562477	-0.00747088	-0.0133027	-0.0813384	0.0704487	0.119344	-0.137266	-0.045547	0.0199226	-0.00403483
chr1_8495063_8614686:-	0.0389183	0.130459	-0.0786316	-0.0830425	-0.0861445	0.123287	-0.000123826	-0.0270189	-0.0409606	0.155082	-0.0629088	0.00772066	0.0395894	-0.123474	-0.0832714	0.0307088	0.0712304	-0.11498	-0.0696612	-0.0313346	0.077926	-0.0247937	0.127453	-0.0305362	0.119244	0.043385	0.130624	-0.124876	-0.040841	-0.090538	-0.0361307	0.0955684	-0.069865	-0.0684928	0.0516517	0.0313144	0.00489944	-0.0869431	-0.011728	-0.0738193	-0.040337	-0.0612323	0.236498	0.068194	-0.0723209	-0.04112	-0.0771716	-0.0536016	-0.0208135
chr1_8541214_8557523:-	-0.314689	-0.481575	-0.495241	-0.349385	-0.608183	-0.573035	-0.257904	-0.470792	-0.39584	-0.446288	-0.384	-0.339239	-0.369059	-0.239059	-0.527789	-0.379308	0.297425	-0.108924	-0.377942	-0.540842	-0.540063	-0.179657	-0.422302	-0.467859	-0.460464	-0.476721	-0.300717	-0.439445	-0.0786653	-0.423341	-0.379398	-0.375625	-0.25406	-0.458914	-0.482994	-0.617644	-0.574164	-0.0959661	-0.275418	-0.0895237	-0.289472	-0.474787	-0.501748	-0.291738	-0.220559	-0.410266	-0.476713	-0.24784	-0.314815
chr1_92320599_92345914:+	-0.0516878	-0.0288111	-0.0373655	-0.0459218	-0.0179725	-0.0764003	-0.031035	-0.044092	0.0176684	-0.0240797	-0.0467231	-0.00827061	-0.0165725	-0.0367686	-0.0622537	-0.0541633	-0.0205046	-0.0323404	-0.0448766	-0.0629733	-0.0634443	-0.032458	0.0067951	0.00341132	-0.0532324	-0.0455485	-0.0448393	0.0145584	0.0208218	-0.00284425	-0.0622766	-0.0511006	-0.032024	-0.0193062	-0.0439273	-0.0367117	-0.00911771	0.0196927	-0.063744	-0.0613545	-0.0241586	-0.0650284	-0.0260858	0.00504608	-0.00768081	-0.0696338	-0.0394422	-0.042617	-0.0412676
chr1_92333391_92345914:+	-0.0404243	0.0187435	-0.050885	0.0635634	-0.0499727	-0.0124123	-0.0885017	-0.0307919	-0.0283758	-0.0478238	-0.0817225	-0.0163228	-0.0479806	0.116201	-0.0739157	0.00846082	-0.0181334	-0.0640559	-0.105458	-0.0328124	0.0824868	-0.0301067	0.0752875	0.0264824	-0.0230249	-0.0119528	-0.0270344	-0.0163478	0.0220893	-0.0239547	-0.0382887	0.0613766	-0.0138426	-0.0452785	-0.0128982	-0.0723979	-0.0236025	-0.0196557	-0.0533183	-0.00919447	-0.0431988	-0.0524987	-0.0118206	0.0321479	-0.0508424	-0.0913203	-0.0529249	-0.0304439	-0.0549629
chr1_92333391_92380873:+	-0.0180641	0.0515315	0.040396	0.144226	0.116344	-0.0447397	-0.0495057	0.0362469	-0.0423421	-0.0603352	-0.0392033	0.0477887	0.0407084	-0.0570378	0.0251033	0.0168563	0.137855	0.0391823	0.0509214	0.0948896	-0.0485194	0.0512468	0.235644	-0.0552159	-0.0387569	-0.0566091	0.026999	-0.0440029	-0.0302183	0.0429084	-0.0397445	-0.0478007	-0.0205011	0.0485642	-0.0390331	0.0195691	-0.051915	0.0241788	-0.0574527	-0.0452326	-0.0454272	-0.0268355	0.108104	-0.0324306	0.0687311	-0.0105577	0.0540645	0.0363419	0.076121
chr1_92563642_92607727:-	-0.011977	0.0602537	-0.0130099	0.000398287	0.00546126	0.0067211	0.00649788	-0.0119042	0.00801985	0.00532154	0.00289136	0.00634531	-0.00515276	-0.0112317	-0.0109902	-0.0174842	-0.0123225	-0.0130565	0.00371978	-0.000171796	0.000774972	0.00344748	0.010168	-0.00194743	0.0206825	0.00818047	0.013774	0.00480761	0.0134061	-0.0128828	-0.0172156	-0.000910114	-0.0123101	-0.0130913	-0.0103249	0.0275091	0.00148462	0.0145388	0.0161857	-0.0119778	0.0268296	0.0144866	-0.00731072	0.0149385	0.11029	-0.01937	-0.0131901	-0.00860053	-0.00661655
chr1_95143891_95151419:+	-0.00275618	0.00257986	-0.0892664	-0.0559662	-0.027413	-0.0372253	-0.0448171	-0.0514948	-0.072656	-0.0108769	-0.0886183	-0.0516172	-0.0509748	-0.00723097	-0.0622006	-0.0538657	-0.0625021	-0.0772164	-0.053543	-0.0433687	-0.0725323	0.0346851	-0.017377	-0.0110122	-0.00568267	-0.0538133	-0.041846	-0.0584507	-0.0822633	-0.0605285	-0.0533402	0.00759117	0.00880073	0.0512853	-0.0673058	-0.0448124	-0.0375071	-0.0205711	-0.0642704	-0.0751262	-0.0417277	-0.0471796	-0.0186187	-0.0165972	-0.0356058	-0.0570584	-0.0062597	-0.035025	-0.0662637
chr1_98953070_98956741:-	-0.0369164	-0.0479645	-0.0193481	-0.00389699	-0.0274394	-0.0438064	-0.0142355	-0.0137337	0.0285152	-0.0163231	-0.016921	-0.0085067	-0.0147919	-0.0259107	-0.0420285	-0.0303743	-0.0505234	0.0157207	-0.0481153	-0.0251395	-0.0397504	0.00786877	-0.0388042	-0.0367113	-0.0466363	-0.0457967	-0.0383524	0.000241209	-0.0377881	-0.0619277	-0.01311	-0.0109423	-0.0537275	-0.0338599	-0.035002	-0.0650014	-0.0181185	-0.00164279	-0.0358851	0.0675639	-0.0537524	-0.00499564	-0.055007	0.063319	0.0143209	-0.047781	-0.0212899	-0.0199599	-0.0510419
chr1_99287965_99301897:+	-0.0149441	-0.0253832	-0.0227276	-0.0152284	-0.0185346	-0.0089869	-0.00946278	-0.0146824	-0.0275832	-0.0154571	-0.0260391	-0.0259987	-0.0240538	-0.0144708	-0.030524	0.0403839	-0.0334124	0.0141768	-0.0272493	-0.0269489	-0.0180775	-0.0120534	-0.00101798	-0.0142118	-0.00798866	-0.0325061	-0.0195384	-0.00626784	0.0142544	0.0112418	-0.0236834	0.00542463	-0.00545668	-0.00357894	-0.0266042	-0.0313412	-0.0352989	-0.0367178	-0.0217903	0.0024525	-0.0346791	0.00462517	-0.0167643	-0.0320908	-0.0363633	-0.0353024	-0.0163611	-0.00948703	-0.0308804
chr1_9931891_9934860:-	0.114271	0.0529495	0.0202191	-0.0120363	0.0258846	0.000505222	0.0142701	0.0248593	0.0149347	0.0170367	0.0256344	0.0308074	0.00446279	0.0363318	-0.00838656	-0.00435872	0.0444544	0.0237786	0.0105836	0.0192064	0.00805253	-0.00493375	0.0392325	0.00458167	0.0236906	-0.0203405	0.0107564	0.0203133	0.135786	-0.0166685	0.0169689	-0.00601345	-0.00635027	0.000462188	0.0240908	-0.00772472	0.0200743	0.0364742	0.00399412	0.00726537	0.0455272	0.0294148	0.0336695	0.0919172	-0.00369043	0.0675059	0.0378058	-0.00405528	-0.00371116
chr10_101667886_101676436:-	-0.056642	-0.00660667	-0.0269647	-0.0549798	-0.01302	0.00704752	-0.00325614	-0.0295688	-0.0313779	0.00230495	-0.0584245	-0.0208271	-0.0212519	-0.0285481	-0.0488876	0.0211969	-0.0469234	-0.0612306	-0.015148	-0.0285353	0.12267	-0.00481165	0.0306059	-0.0483765	-0.00591446	-0.0562568	-0.0399565	-0.0316927	-0.0368364	-0.00639665	-0.0560542	-0.0192159	-0.0175437	-0.0131273	-0.0407021	-0.0329502	0.0638926	-0.0159849	-0.0400701	-0.0166605	-0.0300546	-0.026967	-0.0376244	-0.0206233	0.0493511	0.00746857	-0.0246464	-0.0355769	-0.0454561
chr10_101792839_101810314:-	-0.0895995	-0.0441532	-0.110136	-0.0910753	-0.0454372	-0.0917195	-0.0800149	-0.0856991	-0.0787115	-0.058916	-0.10952	-0.0134392	-0.0660775	-0.0894767	-0.0702445	-0.0357721	-0.0472207	-0.093374	-0.0686424	-0.098065	-0.0748943	-0.0395006	-0.092956	-0.0866604	-0.0842919	-0.0656595	-0.0611475	-0.0324745	0.0402329	-0.0502223	-0.0865239	-0.0631714	-0.0687785	-0.0840734	-0.0633667	-0.0654935	-0.0437953	-0.0774477	-0.0793739	-0.0911864	-0.056597	-0.0999079	-0.0686124	-0.0229567	-0.0543224	-0.116061	-0.0598343	-0.0585162	-0.0763817
chr10_101939863_101957732:-	-0.0208798	0.0216325	-0.0252239	0.00182694	-0.0135983	0.000912337	0.0255014	-0.0137207	0.0261466	-0.00901699	-0.0251593	-0.00516781	-0.00581503	0.0133008	0.00236618	-0.0262038	-0.025277	-0.0134306	-0.00973877	0.0124762	0.0587016	-0.00343777	0.0262164	-0.0113635	-0.0221062	-0.0221759	-0.0114301	-0.00281382	-0.0146347	0.000181189	-0.0279722	-0.00397988	0.0122824	-0.0211406	-0.00584159	0.00451549	-0.021825	0.030062	-0.0215488	-0.020934	-0.00305512	-0.00794977	0.00840098	-0.0191718	-0.0174621	-0.0108279	-0.0141419	-0.014369	-0.0146546
chr10_103570872_103585225:+	-0.0214918	-0.0161764	-0.0150177	-0.014205	-0.0136435	0.00181218	0.0339226	0.00180579	-0.00907273	-0.00678398	-0.00845012	0.0384974	0.00519558	0.00580855	-0.00779799	-0.0137472	0.0064593	0.0476202	-0.0163474	-0.00794171	0.000304823	0.0374348	0.0309534	0.00453459	-0.0262821	-0.00661115	-0.0142947	0.0152748	0.0239835	-0.0122292	0.000275035	0.0124615	0.0250021	-0.000586369	-0.0100184	-4.83e-05	0.0078858	0.0374191	0.00819434	0.001799	-0.0139786	0.0558552	0.02001	0.0451654	0.00868858	-0.0129316	-0.0088459	0.0125912	-0.0207399
chr10_110596398_110598290:+	-0.145756	-0.14119	-0.256793	-0.220514	-0.15444	-0.160022	-0.148832	-0.116773	-0.14025	-0.102754	-0.126628	-0.0904651	-0.122912	-0.122964	-0.150983	-0.130362	-0.0317694	-0.0777306	-0.128347	-0.143176	-0.187729	-0.0586568	-0.150174	-0.167782	-0.098858	-0.130245	-0.098448	-0.125507	-0.0470256	-0.0989858	-0.140116	-0.102103	-0.15189	-0.104789	-0.137262	-0.0684222	-0.152171	-0.131532	-0.144133	-0.117925	-0.142254	-0.128116	-0.151162	-0.131646	-0.103091	-0.0791541	-0.124837	-0.144494	-0.086615
chr10_110964125_110985765:+	-0.0790604	-0.0251907	-0.0874935	-0.0729055	-0.0865151	-0.0615107	-0.0805075	-0.080651	-0.0945461	-0.0837679	-0.0664248	-0.0744056	-0.0800771	-0.0799985	-0.0889695	-0.0677385	-0.0432373	-0.0594946	-0.0903031	-0.0410163	-0.0129406	-0.0613547	-0.076992	-0.0358909	-0.0739685	-0.0795952	-0.0415105	-0.0709148	-0.0755722	-0.0576208	-0.075356	-0.0737177	-0.0735303	-0.0855721	-0.0835503	-0.0675312	-0.0446791	-0.0114681	-0.0692493	-0.0667574	-0.0877466	-0.0917789	-0.0618957	-0.0588948	-0.0609248	-0.0975582	-0.0544929	-0.0689498	-0.0799127
chr10_115120185_115129535:+	-1.57863	-0.96628	-0.821364	-0.975316	-0.954881	-1.12384	-0.536085	-1.20993	-0.44506	-1.02122	-0.525984	-0.803708	-1.3208	-1.48884	-0.95866	-1.2778	-0.138075	-0.184229	-0.765327	-0.763897	-1.74118	-0.411549	-0.874202	-1.30378	-1.45224	-0.733929	-1.12297	-0.223007	-0.682566	-0.857097	-0.921484	-1.23311	-1.58862	-2.12287	-1.30004	1.78095	-1.00182	-0.38541	-0.593398	-0.506619	-0.629985	-0.900593	-1.06735	-0.289313	0.318725	-0.26555	-0.378672	-1.03954	-1.47005
chr10_115120185_115165645:+	-0.129449	-0.0553621	-0.0575413	-0.0757054	-0.0922791	-0.0742333	-0.0478126	-0.095554	0.0128895	-0.0436513	-0.0117372	-0.0567303	-0.113758	-0.0210303	-0.0875652	-0.0923917	-0.0443838	0.103697	-0.0732808	-0.0463412	-0.157143	0.0495835	-0.061319	-0.077252	-0.0996085	-0.0476035	-0.123986	-0.00418141	-0.0662667	-0.0281927	-0.0548472	-0.0890627	-0.127092	-0.122739	-0.0984336	0.0635012	-0.0455949	0.00237385	-0.0447994	-0.032684	-0.0421427	-0.100063	-0.0623239	-0.0608204	0.0803689	-0.0598154	-0.061029	-0.0267808	-0.136368
chr10_115120185_115171292:+	-0.361308	-0.219142	-0.179719	-0.186645	-0.21493	-0.210769	-0.158673	-0.285456	-0.153801	-0.235212	-0.0732962	-0.277594	-0.266889	0.029147	-0.247484	-0.224097	0.051673	-0.0982626	-0.152293	-0.123705	0.180297	0.215857	-0.399776	-0.323591	-0.392948	-0.198263	-0.37072	-0.110715	0.582137	-0.120612	-0.182559	-0.271206	-0.362039	-0.462055	-0.294023	-0.034954	-0.140051	0.222176	-0.199698	-0.305159	-0.00831078	-0.244811	-0.31146	-0.0333769	0.291775	-0.124506	-0.158803	-0.12301	-0.408859
chr10_115120185_115215880:+	-0.414438	-0.221675	-0.185087	-0.192547	-0.169369	-0.162885	-0.176213	-0.311014	-0.0351153	-0.136812	-0.161597	-0.167972	-0.212721	-0.395898	-0.25177	-0.29165	-0.254485	0.132102	-0.189942	-0.21601	-0.5302	-0.0543897	0.0409581	-0.311261	-0.258625	-0.0878745	-0.377414	-0.129887	-0.477236	-0.0490188	-0.178955	-0.313984	-0.315112	-0.309771	-0.300435	1.21775	-0.368804	0.00952053	-0.0348098	-0.330114	-0.204306	-0.287582	-0.176972	-0.0984839	-0.337191	-0.0863179	-0.0447902	-0.261929	-0.360176
chr10_115120185_115241725:+	-0.0768912	-0.141156	0.0293919	-0.0708858	-0.0946137	-0.134385	0.0680535	-0.0817292	-0.100291	0.0483456	0.00734514	-0.250001	-0.0970871	-0.114441	-0.041542	-0.233333	0.688369	-0.15025	0.0360961	0.0201779	-0.115901	-0.222709	-0.196409	-0.0781051	-0.203111	-0.0513956	0.0297794	-0.0141832	0.602346	-0.117784	0.0232963	-0.126791	-0.0887575	-0.299661	-0.115884	0.433304	0.0453668	-0.290648	-0.20205	0.15281	0.0455025	-0.0257253	-0.0857935	0.245249	0.303069	-0.021351	-0.0911682	0.261325	-0.000319658
chr10_115120185_115268444:+	-0.0604685	-0.0149343	0.0235961	0.0176895	-0.0317269	0.00458933	0.0112665	-0.016746	0.00594849	0.0122382	0.00450856	0.0908858	-0.0614555	-0.0234659	0.0465679	-0.0464961	0.0713055	0.0458998	-0.00738107	0.0266847	-0.013466	0.0293682	-0.00761474	-0.0327954	-0.0612031	0.0202545	0.00108994	0.00919373	0.0490363	-0.00589702	0.027298	-0.0825215	-0.0865592	-0.12879	-0.0307998	0.136724	-0.00317465	0.250131	-0.0216565	-0.0362262	0.0162598	-0.029318	0.00652572	0.0151325	0.147389	0.013068	0.00631135	0.038161	-0.0071555
chr10_115120185_115315736:+	-0.418514	-0.287311	-0.115402	-0.120233	-0.190901	-0.261374	-0.0394127	-0.304005	-0.0217963	-0.156481	-0.100704	-0.158166	-0.328088	-0.450015	-0.20371	-0.224004	0.0608332	-0.0494012	-0.128787	-0.142162	-0.553501	0.0570801	-0.146901	-0.310926	-0.526243	-0.061286	-0.331804	-0.0761629	0.511678	-0.145304	-0.0890144	-0.294401	-0.427827	-0.577673	-0.331754	0.806025	-0.173068	0.0347437	-0.130676	-0.0426953	0.0663137	-0.0614948	-0.176984	0.0892395	0.313844	0.00254304	-0.0680654	-0.101555	-0.336787
chr10_115120185_115469329:+	-0.0955419	-0.0840994	-0.0379861	-0.0663262	-0.0492397	-0.0510518	-0.0220421	-0.0883299	-0.0220909	-0.0479928	-0.0135691	-0.0863288	-0.100307	-0.0215271	-0.0618653	-0.047625	-0.0492182	-0.000805103	-0.0351372	-0.0436004	-0.0466621	0.087329	-0.0517608	-0.0788272	-0.0980344	-0.052501	-0.0376236	-0.049876	0.105284	-0.0443546	-0.0404623	-0.109771	-0.0786679	-0.139877	-0.102177	0.0981397	-0.0267579	-0.0620291	-0.0649406	-0.0306879	0.0415793	-0.048253	-0.0746039	-0.0417917	0.142783	-0.0414522	-0.0358887	-0.00989974	-0.0959388
chr10_115215697_115268444:+	-0.0161717	-0.0143984	0.010315	-0.00746374	-0.00886849	-0.00486977	0.0185814	0.00200392	0.00148599	-0.00551206	0.0260017	0.00834298	-0.00458851	-0.00108515	0.00930601	0.00148782	0.0417649	0.0453449	0.00603995	0.00599354	-0.0479635	0.00988071	0.0291653	-0.00752963	-0.0275461	-0.0101379	-0.0108225	0.0140099	0.0324451	-0.00725216	0.0043346	-0.00685712	-0.000384796	-0.0337755	-0.0179869	0.104838	0.0110188	-0.00767014	0.0181756	0.0355765	0.0012708	0.0145299	-0.0219805	0.0744435	0.0617849	0.00212129	-0.00691385	0.0311149	-0.0378064
chr10_115215697_115286397:+	-0.0447488	-0.0311616	-0.0236132	-0.037106	-0.0093974	-0.0526885	-0.0117622	-0.0391862	-0.0265033	-0.0373241	-0.0169573	-0.0261922	-0.0120251	-0.0577607	-0.0452053	-0.0468372	-0.0356587	-0.0263185	-0.0333372	-0.0302332	-0.0167715	-0.0320416	-0.043625	-0.0418095	-0.0493993	-0.0380251	-0.0172316	0.000972879	0.0124357	-0.0290494	-0.032033	-0.0350285	-0.0469585	-0.058265	-0.0392	0.0156661	-0.0471486	-0.0173634	0.00290326	-0.0422785	0.00302654	-0.0262503	-0.0309928	-0.0393167	0.00298449	-0.00825857	-0.0197163	-0.0196807	-0.0296722
chr10_115215697_115315736:+	-0.0502031	-0.0339406	-0.0152778	-0.0320203	-0.0263986	-0.0389657	-0.0155197	-0.0315864	0.0296102	-0.0308285	-0.010984	-0.0162005	-0.0383509	-0.0321275	-0.0413168	-0.0495817	0.00994067	-0.0243336	-0.0301976	-0.0196139	-0.015747	-0.025081	-0.027858	-0.0472951	-0.0469323	-0.0287109	-0.0148592	-0.0227037	0.0492222	-0.0270791	-0.0217399	-0.0156297	-0.0597406	-0.0209442	-0.0295389	0.0421698	-0.0264981	-0.00609336	-0.0138096	-0.00689442	-0.0151508	0.00734478	-0.00732937	0.020556	0.0415087	-0.0111758	-0.0164057	-0.0330174	-0.0393661
chr10_115461941_115469329:+	-0.0999624	-0.051535	-0.109048	-0.117354	-0.107828	-0.0542889	-0.0751714	-0.146102	-0.173345	-0.0286443	-0.101727	-0.18193	-0.0433327	-0.11413	-0.141813	-0.144597	-0.0878413	-0.104495	-0.0884619	-0.0689018	0.031954	0.0851334	-0.0268338	-0.0903092	-0.135905	-0.0527431	0.0512271	-0.0861574	-0.099195	-0.104224	-0.0878091	-0.0600858	-0.159427	-0.182795	-0.121438	-0.145601	-0.1712	-0.104323	-0.115042	-0.143015	-0.0683301	-0.156437	-0.129031	-0.059232	-0.0465933	-0.0774374	-0.0987842	-0.104697	-0.10649
chr10_118685983_118730410:-	-0.0582308	-0.0238794	-0.0554998	-0.0427782	-0.058509	-0.0720077	-0.0154535	-0.0418265	-0.0411152	-0.0335327	-0.0795279	-0.0301665	-0.0520844	-0.0234585	-0.0702368	-0.0443941	-0.0149172	0.0153475	-0.0663265	-0.00356971	-0.0753121	0.00730549	0.0224486	-0.0384753	-0.0778312	-0.0530447	-0.0255346	-0.0681594	-0.0320369	-0.0461167	-0.0676685	-0.0395035	-0.08654	-0.0859165	-0.0641895	-0.058376	-0.0440377	-0.0719406	-0.0181903	-0.0797594	-0.0366366	-0.0745356	-0.0570465	-0.0494813	0.00273883	-0.0679067	-0.0368388	-0.0562308	-0.0839316
chr10_121790169_121924329:-	-0.0392983	-0.0196673	-0.015552	-0.0365081	-0.0236737	-0.0118746	-0.0319293	-0.0127789	-0.0187259	0.00356019	-0.0211451	-0.0357247	0.0611909	-0.0504949	-0.000879452	-0.0263462	-0.0541228	-0.018353	-0.0421735	-0.0115278	-0.029834	-0.0448704	-0.0612718	0.0299692	-0.0108838	-0.0114252	-0.0172984	-0.0301115	0.0356183	-0.0409661	-0.00450098	-0.0435769	-0.0235003	-0.0290372	0.0238207	0.069005	-0.0240661	-0.0481109	-0.00769458	-0.0477074	-0.0340237	-0.0262947	-0.031153	-0.0132238	-0.0523416	-0.0145244	-0.00453735	-0.0261682	-0.00598887
chr10_121836718_121924329:-	-0.0505207	-0.0505922	-0.0411715	-0.0632992	-0.0486485	-0.0511601	-0.0247784	-0.0404225	-0.0517646	-0.0675188	-0.0538388	-0.0514175	-0.0519912	-0.0486247	-0.0526967	-0.0577461	0.00820961	-0.0268987	-0.0544579	-0.0509062	-0.0743072	-0.0532713	-0.0213828	-0.0469124	-0.0419103	-0.0368974	-0.0639051	-0.057245	-0.0531232	-0.0394841	-0.0415677	-0.0480816	-0.0654361	-0.064064	-0.0482368	-0.0384903	-0.0401638	-0.0173473	-0.0656761	-0.0599069	-0.0184008	-0.0555516	-0.0511197	-0.0405412	-0.0419035	-0.0592831	-0.044327	-0.0479346	-0.0321546
chr10_124681607_124682379:-	-0.00166363	-0.0241858	-0.0403613	0.0378641	-0.0232469	0.153534	-0.0220537	-0.00663	-0.0379305	0.0270948	-0.0359894	-0.0225267	0.0124316	0.0391959	0.014584	0.0237474	-0.0288	-0.0399176	-0.0388993	-0.0208083	0.023022	0.018479	0.0238493	0.0149942	-0.00113144	-0.00313082	0.107146	-0.0240538	-0.00283746	0.0672415	-0.0474978	0.0932355	-0.00980893	-0.0268895	0.00969203	0.00119016	-0.0291425	0.0440798	-0.0321616	-0.0360868	-0.00586754	0.0147371	0.0103923	-3.4e-05	-0.00313314	-0.0127064	-0.0312325	0.0257665	-0.0266364
chr10_126970702_127000307:+	-0.0202904	0.0218576	-0.00488219	-0.022767	-0.0132603	0.00680919	-0.0226083	-0.011825	-0.0156829	-0.022581	-0.0226437	-0.0198056	-0.00979539	-0.000795673	0.0673788	0.029844	0.0111204	-0.0123321	-0.0217946	0.0112023	0.0752382	0.021395	-0.0298117	-0.0128911	-0.0154982	-0.0202809	-0.00589005	-0.0370219	-0.0283627	-0.0274095	-0.0484205	0.0361759	0.0126836	-0.0257799	-0.0268307	-0.0158619	-0.0198012	-0.0138764	-0.00519551	0.00377823	0.00572072	-0.00788495	0.0117718	-0.00987462	0.0101068	-0.0398576	-0.0421846	0.0171415	-0.018198
chr10_14896846_14897517:+	-0.052125	-0.0136812	-0.052224	-0.0234209	-0.0172471	-0.0278019	-0.0232557	-0.0312243	-0.0417454	0.010774	-0.051872	-0.00131606	-0.0377879	-0.0125124	-0.0368193	-0.0458105	0.01319	-0.0583809	-0.0523093	-0.0432375	-0.0300518	-0.0119087	-0.0166979	0.00576557	-0.0405977	-0.0239622	-0.0098532	-0.0387654	-0.00346928	-0.042162	-0.0489297	-0.028243	-0.0389824	-0.0393941	-0.0369034	-0.0434878	-0.0259995	-0.0425109	-0.0180804	-0.0221904	-0.0451208	-0.0158326	-0.0230742	-0.0325088	0.0273263	-0.0542415	-0.0341254	-0.0431058	-0.0403419
chr10_15833630_15847943:-	-0.0344013	0.0156113	-0.0276903	-0.0284015	-0.0447203	0.0201768	-0.0785625	-0.0738564	-0.0881037	-0.0303642	-0.0993671	-0.0447336	-0.103801	0.0771619	0.00331714	-0.0495412	-0.113016	-0.0979558	-0.0749211	-0.0363999	0.212313	-0.0252742	-0.108522	0.0176599	-0.0265785	0.00815483	-0.0947524	-0.0740063	-0.064492	-0.0717576	-0.0788696	-0.038738	0.00224293	-0.0455416	-0.0265799	-0.0596444	-0.0293677	-0.0363692	-0.0608508	-0.0643459	-0.0380928	-0.0802261	0.0156045	-0.06125	-0.0601199	-0.089904	-0.0218588	-0.0141025	-0.0196291
chr10_16752539_16782084:-	-0.0178452	-0.00323293	0.00939337	-0.0439679	-0.0209538	-0.00788166	-0.0276683	-0.0118063	0.0116283	-0.0220795	-0.020645	-0.0073094	-0.0083609	-0.0244128	-0.0203253	0.0261104	-0.00411021	-0.0283125	-0.00668788	-0.0222911	0.0396006	-0.01959	0.039289	-0.0257158	0.00389952	-0.0279264	0.0175743	-0.0113428	0.0056447	0.0395353	-0.0500981	-0.0163313	-0.0248643	-0.0208172	0.00979116	-0.0204945	-0.0193052	-0.0234156	-0.0225219	-0.000107621	-0.0174372	-0.0171335	-0.0232467	-0.00614607	0.0139796	-0.0289035	-0.0206172	0.00591743	-0.0174838
chr10_17704431_17705741:+	-0.0794131	-0.053635	-0.087119	-0.0953075	-0.0435064	-0.0670215	-0.0661206	-0.0629104	-0.0751207	-0.112767	-0.0278038	-0.0300394	-0.0538976	-0.0805113	-0.0853371	-0.0898296	0.0273436	0.00383287	-0.0594233	-0.0302158	-0.0589589	-0.0397556	-0.00629921	-0.0594288	-0.0335161	-0.0792952	-0.0404257	-0.0021455	-0.0538477	-0.0358609	-0.074661	-0.0675273	-0.0404302	-0.0715343	-0.0737993	-0.0634225	-0.0232664	-0.0717394	-0.0701144	-0.035122	-0.0810598	-0.0697701	-0.0902662	-0.0616029	-0.0349684	-0.06094	-0.0598156	-0.0471295	-0.078858
chr10_179994_221356:+	-0.0375362	-0.00818972	-0.0157883	-0.0250384	-0.0170874	0.000481965	-0.0243632	-0.011823	0.0201384	-0.0238047	-0.0211203	-0.0223466	-0.016381	0.0114267	0.0222916	-0.0261916	-0.0249018	0.0178181	-0.0242526	-0.0206363	-0.0236627	-0.0122052	-0.00265309	-0.00367123	-0.00984686	-0.0224721	-0.00171218	0.0102586	-0.00964167	0.0125801	0.000496893	-0.0269626	0.0395278	-0.0118256	-0.00861149	0.0124243	-0.0129519	-0.0316076	-0.0185511	-0.0146856	0.0233312	-0.0158763	-0.015796	-0.00638753	0.00672013	-0.0190788	-0.0172433	-0.00106699	-0.0391094
chr10_179994_249088:+	-0.0468819	-0.133432	-0.169852	-0.163867	-0.136038	-0.164371	-0.163761	-0.130491	-0.142566	-0.148846	-0.13244	-0.115159	-0.153182	-0.0880753	-0.179251	-0.142979	-0.106854	-0.109231	-0.169432	-0.171863	-0.164207	-0.135104	-0.136177	-0.143236	-0.142489	-0.177094	-0.102497	-0.125539	-0.0107998	-0.140996	-0.130433	-0.121898	-0.156775	-0.138794	-0.116595	-0.123283	-0.14395	-0.205015	-0.141182	-0.11392	-0.143884	-0.166984	-0.139428	-0.169735	-0.144895	-0.149863	-0.139921	-0.108531	-0.128623
chr10_21904522_21920963:-	-0.00689526	-0.0026533	-0.00674865	-0.0108558	0.000246368	0.0153157	-0.00963892	-0.00592152	0.000414106	-0.0107693	-0.0103182	0.0192014	-0.00206687	0.0296393	-0.00337396	0.0179517	0.029379	0.0618517	-0.00985351	-0.00463115	-0.00729009	-0.00385832	0.0280281	0.00601496	-0.00428802	0.00572548	0.00255763	-0.00206089	0.00269455	0.013838	0.0261795	0.0102493	-0.00549475	-0.00561982	-0.00657593	-0.00360391	0.00779687	0.0386405	0.00375016	0.0142574	0.0291278	-0.00776231	0.0259894	0.0414002	0.0245056	-0.0075519	0.0137623	-0.00623944	0.0202222
chr10_31908172_31910563:-	-0.0718186	-0.0901283	-0.0632457	-0.0607151	-0.114055	-0.0815718	-0.167309	-0.0880675	-0.131107	-0.143843	-0.130535	-0.107459	-0.0203442	0.0129554	-0.116604	-0.0294301	-0.149944	-0.208899	-0.149344	-0.0467446	-0.0244229	-0.0793292	0.161147	-0.0174171	-0.0121378	-0.0520708	0.0231931	-0.126482	0.0043178	-0.0547598	-0.176945	-0.0273664	-0.0488198	-0.0971557	-0.0131372	-0.0856342	-0.0861398	-0.0601275	-0.0970854	-0.0954023	-0.0839107	-0.106624	-0.0102711	-0.094459	-0.0306075	-0.107963	-0.0789984	-0.101866	-0.0404828
chr10_32451592_32474023:+	0.0799501	-0.00114029	0.0528917	0.042886	0.0579508	-0.0962581	0.0083033	-0.00294141	0.0285431	0.0686083	0.0250143	0.0595918	0.00647825	0.0184584	0.0181558	0.0754255	-0.0558021	0.0232217	0.00109944	0.0503024	-0.0532122	0.151114	0.0647478	-0.0354063	-0.0528571	-0.005122	-0.0158039	0.0693081	0.304685	-0.0167142	0.00933976	-0.0015205	0.0712744	0.0762196	-0.00681049	0.089786	0.0933287	0.110553	0.0659857	0.0546377	0.0196983	0.036002	-0.00438775	0.105	0.167145	0.0282115	0.0335328	0.0219375	-0.0547039
chr10_43154897_43158931:+	-0.0661822	-0.0569258	-0.0252632	-0.050754	-0.0648447	-0.084524	-0.0635174	-0.0602044	-0.0687277	-0.0716518	-0.0475	-0.0416818	-0.0471069	-0.0628146	-0.07145	-0.0722352	-0.0555711	-0.0396121	-0.0504592	-0.0748524	-0.0744847	-0.0536511	0.0223149	-0.0588827	-0.0610478	-0.0502465	-0.033542	-0.04055	0.0273491	-0.0637365	-0.0700509	-0.0639267	-0.0755392	-0.0525222	-0.0562668	-0.0399553	-0.0433675	-0.0556077	-0.0737402	-0.0693983	-0.0253404	-0.0642618	-0.0556956	-0.0701096	-0.0412834	-0.100539	-0.0554188	-0.040478	-0.0954318
chr10_48401612_48410168:+	0.00908128	-0.000991875	-0.014717	-0.00308036	-0.014724	0.0123743	-0.010735	-0.0170611	-0.0201116	-0.0337351	-0.0171617	-0.0218384	-0.0262912	0.0239598	-0.0394479	-0.0287931	-0.0160562	-0.00446066	-0.0303226	0.00978367	-0.00182168	0.0148007	0.00311853	-0.0203493	-0.0313853	-0.0151331	-0.0129135	-0.012631	-0.0373986	-0.0253231	-0.030798	-0.00328971	-0.0337191	0.091887	-0.0137598	-0.0334615	-0.0032067	-0.03243	-0.0323426	-0.0321204	0.0290489	-0.0310982	-0.0291517	-0.00274829	-0.0149085	-0.0124073	0.00167493	-0.0112751	-0.0456903
chr10_50433476_50466932:-	-0.0420334	0.02704	-0.0353676	-0.0407194	-0.041027	-0.0357214	-0.0400894	-0.0271734	-0.00187403	-0.0412545	-0.0358205	-0.0272202	-0.00403814	0.0202937	-0.0196431	-0.00889254	-0.0221445	0.0730562	-0.0178155	-0.0321124	0.00766766	-0.000905284	0.023408	-0.00938985	-0.0221192	-0.0210431	0.0178217	-0.0415329	0.01527	-0.0315245	-0.0499978	-0.0260685	-0.00111285	-0.0365167	0.0289038	0.00927669	-0.0267164	0.0131859	-0.025584	-0.0411075	0.0563927	-0.0386781	0.0177817	-0.0405099	0.031116	-0.0266049	-0.0308458	-0.0225173	-0.0425689
chr10_50460673_50590247:-	-0.067388	0.018967	-0.067003	0.00493595	-0.00406842	-0.00344504	-0.00470485	-0.0496705	0.00570506	0.0402065	0.0368746	-0.00776188	0.0309872	0.0143107	-0.00612205	0.10891	0.00285009	0.0184804	0.0567362	-0.0340257	0.108404	0.142615	0.0321813	-0.00846009	-0.0465335	0.0397089	0.0326049	0.0575609	-0.00931091	0.0284802	-0.0627708	-0.0140371	-0.0614234	0.0220933	-0.0285978	0.0723342	0.0669641	0.0553406	-0.00860943	-0.0287555	-0.0138959	-0.0389822	-0.0116002	0.0746123	0.1315	-0.0609661	-0.019924	0.000444096	-0.0309032
chr10_5794885_5800705:-	-0.0124413	0.0209505	0.00071584	-0.0222261	-0.0190632	-0.0326241	-0.0228325	-0.00941514	-0.0230558	-0.0170628	-0.0176984	0.0108248	-0.0188373	-0.0163275	-0.0116665	-0.0324516	0.00828568	-0.024219	-0.0143409	0.016814	-0.00886953	0.0385075	0.012597	0.00768541	-0.00746092	-0.0323704	0.000840193	-0.0168439	0.0076229	0.0532013	0.0065545	-0.0210095	0.0167251	0.0420442	-0.0248056	-0.00546856	0.0267508	-0.0153743	-0.011095	0.0462861	-0.0223146	-0.0192349	-0.0105452	-0.0192392	-0.0114637	-0.0132939	-0.0116266	-0.0136477	-0.0180116
chr10_60084602_60085253:-	-0.0346594	-0.0126084	-0.0886856	-0.0405518	-0.0462194	-0.0527716	-0.0184316	-0.0538806	-0.0140759	-0.0491856	-0.0427697	-0.0629964	-0.0427034	-0.0280194	-0.0505925	-0.0622638	-0.0372084	-0.0411792	-0.0609848	-0.0766324	-0.0596901	-0.0111799	-0.0525625	-0.0206647	-0.0631571	-0.0464099	-0.00691221	0.00355531	-0.00104485	-0.0249523	-0.0297305	-0.0519092	-0.0497065	-0.0237467	-0.0614831	-0.0522425	-0.0387658	-0.0063544	-0.0200522	-0.0640281	-0.0490474	-0.0536177	-0.0519765	-0.0293683	-0.0192743	0.00504942	-0.0413652	-0.0550836	-0.0585122
chr10_67966683_68014186:-	-0.0365149	-0.0246374	-0.04344	-0.0344384	-0.034104	-0.040771	-0.0252939	-0.0333367	0.00428999	0.0352604	-0.0341885	-0.00904676	-0.0392644	-0.0262552	-0.0386158	-0.0356162	0.00903373	0.0362158	-0.0502787	-0.0441286	-0.0336357	-0.0283959	-0.016092	-0.0371135	-0.00545054	-0.021059	-0.0127935	-0.0301888	-0.00789957	-0.033277	-0.0172843	-0.0406895	-0.0443832	-0.0556074	-0.0393312	0.00523888	-0.0236176	-0.0366248	-0.0109487	-0.0185402	-0.0217994	-0.0238831	-0.0358352	-0.00387036	0.0586872	-0.0221835	-0.0185896	-0.0313246	-0.041874
chr10_68393138_68394451:-	-0.00974494	0.00180857	-0.0394748	-0.0084375	-0.0104847	-0.0450987	-0.0153094	-0.0381122	-0.00666332	-0.0220883	-0.0151679	-0.0457165	-0.0176266	-0.0398967	-0.0431099	-0.0141174	0.0822775	-0.0391251	-0.0469165	-0.0575874	-0.0205846	-0.0586424	-0.0409849	0.00344657	-0.0408723	-0.0203531	-0.00267557	-0.0152824	0.0728253	-0.0152639	-0.0355623	0.0121797	0.00952405	0.0174237	0.00488305	0.0291536	0.00865252	-0.037598	0.0123718	-0.00566092	-0.018408	-0.0195938	-0.00932941	0.00402992	0.0375677	-0.0397115	-0.00734807	-0.0110901	-0.0217696
chr10_68487144_68506718:-	-0.00455441	0.000722363	-0.0572997	-0.0374182	-0.0220553	-0.0360332	0.0168743	-0.0183727	-0.0377048	-0.020605	0.0437142	0.0216277	0.0111968	-0.0116678	0.00384217	-0.0162745	0.0277889	-0.0527946	-0.042281	-0.0424971	0.0187846	0.0425613	0.0233229	0.0350028	-0.00807283	-0.00359391	-0.00605765	-0.0292542	0.086188	0.018941	-0.0205875	-0.00577266	0.0281013	0.0284479	-0.00349592	0.00318057	0.0317322	-0.0466865	0.0613443	0.022379	0.0873496	-0.00227456	-0.0137916	-0.0443474	0.022989	-0.0163704	-0.0141691	0.0306951	0.00846586
chr10_70844473_70859499:+	-0.0259405	-0.0136153	-0.0406682	-0.0340284	-0.0206063	-0.0280854	-0.0257146	-0.038427	-0.0451509	-0.0302339	-0.0284229	-0.0293251	-0.0283524	-0.043671	-0.0503419	-0.0479607	0.0149692	-0.0034953	-0.0250624	-0.0444604	-0.0255893	-0.042785	0.0148993	-0.0404061	-0.0245253	-0.0450474	-0.0178049	-0.0342274	-0.0472721	-0.0380645	-0.0303757	-0.0294668	-0.0480095	-0.0236551	-0.0207586	-0.034224	-0.0351667	-0.0151179	-0.036461	-0.033311	-0.0189521	-0.0344863	-0.0444367	-0.00704325	-0.0255877	-0.00592715	-0.0309497	-0.0190849	-0.0546017
chr10_72340789_72341170:-	-0.0787748	-0.064752	-0.0572787	-0.124138	-0.0739143	-0.0366804	-0.0323133	-0.0598679	-0.0256924	-0.0801728	-0.0652823	-0.0324172	-0.0478382	-0.0115818	-0.10287	-0.0785142	-0.0462442	-0.0275302	-0.043392	-0.0523226	-0.0301393	-0.0570824	-0.0203739	-0.0874742	-0.064949	-0.0737772	-0.0541306	-0.0135576	-0.0212725	-0.0853775	-0.0962354	-0.0598842	-0.0516504	-0.0531542	-0.0896678	-0.064799	-0.0910619	-0.0785331	-0.0507335	-0.00390913	-0.0911971	-0.101857	-0.0257538	-0.0729228	-0.0408387	-0.0723839	-0.0378198	-0.0773604	-0.0672391
chr10_7243558_7285954:-	-0.0554491	-0.0118514	0.0472112	-0.0126326	0.0191491	-0.00858762	0.101089	-0.0101033	-0.00628206	0.00550975	0.0409233	0.0694214	0.0252928	0.0590836	-0.000816519	-0.0193327	0.0735869	0.114617	0.0889104	0.00626817	0.0273795	0.0575412	0.121273	0.029754	0.0271428	-0.011147	-0.028236	0.0130007	0.0128097	-0.0012505	0.00549377	0.031656	0.132047	0.127909	-2.49e-05	0.0697446	0.0332081	0.0371756	0.0255191	0.124587	0.0209193	-0.0125213	-0.0305094	0.00679432	-0.0137586	0.000298022	0.0367028	-0.0254569	0.0206216
chr10_7276892_7285954:-	-0.0810805	-0.032755	-0.0672378	-0.0503228	-0.0267297	-0.0785631	-0.0240341	-0.0629989	-0.0667441	-0.0311251	0.0119103	-0.0323968	-0.0365112	-0.032583	-0.0874999	-0.0934262	-0.0269073	0.00602996	0.0409429	-0.0896713	-0.05119	-0.0436925	-0.0303193	-0.0355356	-0.0142601	-0.0555314	-0.0302677	-0.0335901	0.00591576	0.00183402	-0.0547198	-0.032672	-0.0190462	-0.00980237	-0.0269038	-0.025699	-0.0295594	0.00659211	-0.0382975	0.0539661	0.00722106	-0.00583024	-0.00954852	0.0023494	-0.0228558	-0.0377504	-0.0530649	-0.0607429	-0.0558032
chr10_74842600_74843478:+	-0.0437381	-0.0116937	-0.0078585	-0.00483806	-0.0145999	0.00149851	0.0231179	0.00669222	0.0930312	0.0253462	0.10368	0.0502784	0.0131377	0.0462337	0.0223831	-0.00874422	0.102069	0.153783	0.0803626	0.00959774	0.0101052	0.0549372	0.00529685	-0.0061193	0.00680045	0.0108115	0.0214906	0.0474201	0.0664837	0.00340131	-0.0152995	-0.00313443	-0.00907722	0.0257793	-0.00994664	0.0208018	0.0215991	0.276005	0.0654187	0.11341	0.0769735	0.0275514	-0.0100834	0.0365753	0.301272	0.0264479	0.00536897	0.0199087	-0.0295929
chr10_76944773_76970067:-	-0.0178123	0.0129151	-0.0160936	-0.0341341	-0.0192803	-0.00850758	-0.0150619	-0.0303433	-0.0122003	0.0540832	-0.0245979	-0.0165933	0.00426902	-0.0240043	-0.0192484	-0.0276316	-0.023045	-0.0216108	-0.00101922	0.0186292	0.00989785	-0.0218603	0.0190467	0.0252213	0.00716876	-0.0227754	-0.0233827	-0.0136446	-0.0225254	0.0144229	-0.00578858	0.00413463	0.030368	-0.0253134	-0.0254475	-0.00380151	-0.00862351	-0.0182053	-0.00822614	-0.000607484	-0.0234329	-0.024848	-0.00298972	-0.0203511	-0.0210283	-0.0152797	-0.0146786	-0.00490875	-0.0170696
chr10_7797047_7802854:+	-0.505622	-0.39711	-0.259356	-0.705635	-0.262439	-0.552661	-0.518078	-0.333355	-0.408267	-0.439965	-0.43591	-0.571916	-0.554534	-0.60401	-0.458648	-0.580035	-0.295225	-0.476117	-0.421836	-0.31118	-0.643881	-0.449099	-0.456014	-0.516681	-0.535861	-0.70932	-0.529996	-0.324364	-0.300952	-0.684823	-0.484557	-0.629022	-0.643612	-0.257922	-0.436352	-0.546023	-0.40925	-0.518446	-0.338082	-0.253006	-0.286082	-0.27653	-0.516505	-0.558446	-0.648468	-0.375071	-0.296604	-0.531574	-0.375325
chr10_84417771_84425893:+	0.0810976	0.0341642	0.0366201	0.0260542	0.029793	0.023034	0.0185144	0.0254568	0.0456325	0.00783867	0.0352373	0.046108	0.0190636	0.0145119	0.0101459	0.0099769	0.0721078	0.0800307	0.0859113	0.0430927	0.0126833	0.0327485	0.00284851	0.045121	0.0289889	0.019525	0.0594082	0.105337	0.0414954	0.0522256	0.0187492	0.0179796	0.0460319	0.0193117	0.0470767	0.037962	0.0561086	0.0613708	0.0790755	0.052171	0.0605059	0.0254744	0.0259562	0.0161032	0.0355299	0.106653	0.0367172	0.0312752	0.00863693
chr10_84438512_84477664:+	0.00885194	-0.00973911	-0.00211274	0.0265068	0.0164477	0.033274	0.000980685	0.0187421	-0.0196965	0.0581241	-0.0146033	0.0209932	0.0174819	0.0388592	0.00784339	0.0244078	0.0163472	0.0263538	-0.012029	-0.00930342	0.0589848	0.0281064	0.0932596	0.0174097	0.0254545	0.00911731	0.0191906	-0.0189933	0.0115404	0.00737071	0.021683	0.0406602	-0.00989366	0.0052917	0.014038	-0.0094086	-0.0035337	-0.00792089	0.0270267	-0.0158665	0.00547047	-0.0138004	0.0663034	0.0330366	0.0637395	0.0153402	0.0053314	0.0166725	0.0181134
chr10_87767673_87776427:-	-0.0224668	-0.00250702	0.0131805	-0.00493417	0.0131691	0.0121268	0.0261227	0.00218485	-0.00889929	-0.00106088	0.0163042	0.0346887	0.0330978	0.0424316	0.0115711	0.00563609	0.0767918	0.0353482	0.064507	0.0369214	0.00245981	0.000165589	0.0408037	0.0435098	0.00330003	0.0284644	0.0169275	0.00796227	0.0091612	-0.00374023	0.00966062	0.0481854	0.0429723	0.0209169	0.00176403	-0.00340179	0.030471	-0.00436736	0.000127767	-0.00140642	-0.010215	-9.39e-05	0.000765168	0.0596718	0.10004	0.042044	-0.00248599	-0.00523968	-0.00271897
chr10_88901656_88922436:+	-0.0656219	-0.0677745	-0.0836757	-0.0506454	-0.0897385	-0.0855752	-0.070501	-0.0840072	-0.0816766	0.0401235	-0.106849	-0.102782	-0.0998084	-0.0443878	-0.0152818	-0.0990992	-0.0936116	-0.112698	-0.0477015	-0.0881554	-0.0400479	-0.069727	-0.0623088	-0.0491482	-0.0700004	-0.085005	-0.0328138	-0.0629069	-0.10005	-0.0248261	-0.112721	-0.027866	-0.0410665	-0.0941705	-0.0608301	-0.0646199	-0.109074	-0.0311083	-0.102709	-0.0966342	-0.0889711	-0.114884	-0.0146751	-0.0816865	-0.0422345	-0.100373	-0.0608283	-0.0893527	-0.0778373
chr10_91819270_91842391:+	-0.00131585	-0.0406135	-0.00958757	-0.0365381	-0.0187237	-0.0369432	-0.052462	-0.0295008	-0.0408965	0.00274468	-0.0468306	-0.00450022	-0.0219329	-0.0152365	-0.0384723	-0.0136942	-0.0214816	-0.0408489	-0.0426479	-0.040374	-0.0364766	-0.0471064	-0.0443628	-0.0419702	-0.0384893	-0.0410758	-0.0222902	-0.0325027	0.0435157	-0.0405931	-0.0330408	-0.00601436	-0.0282223	-0.0442842	-0.031378	0.0301603	-0.0394608	0.0440638	-0.0272753	-0.0399249	-0.0383493	-0.0353864	0.0203652	-0.0335746	-0.0164902	-0.0300961	-0.0406076	0.00686471	-0.0468472
chr10_92081320_92091944:-	0.0245904	0.0298174	-0.00986744	0.0296305	0.00454275	0.00148992	-0.0150152	-0.00419133	-0.0151625	0.00308459	-0.00123587	0.00624352	0.0206125	0.023257	-0.00829382	-0.0148381	0.00639654	-0.00280929	-0.0128634	-0.00405595	0.0259547	0.0154823	0.0117994	-0.0126487	0.0056838	-0.00380261	-0.00233692	-0.00645086	0.00139314	0.00728803	-0.00618973	0.0136844	-0.00205741	0.00047527	0.00495935	-0.00281273	0.00784222	-0.00689863	0.000640879	-0.00620769	0.0282168	0.0036795	0.0127833	0.00195844	-0.00448346	0.016351	-0.00521847	0.00592921	7.85e-05
chr10_92531748_92537550:-	-0.0530239	-0.0167567	-0.0273388	-0.0154605	-0.00602096	-0.0295727	0.00302636	-0.0145585	-0.010163	-0.0317333	-0.000460478	0.0369754	-0.0149211	-0.0238186	-0.00240874	0.0241387	0.0818881	-4.97e-05	-0.00235541	-0.0195169	-0.0216902	0.0287717	-0.0328161	0.00285961	-0.0079728	-0.00919119	0.0200507	-0.025114	0.0376263	0.000935203	-0.0075805	0.00795824	-0.0386891	0.00215512	0.00766932	-0.00354518	-0.0428747	-0.0126221	-0.0203173	-0.0220333	-0.0222049	-0.0110571	-0.0115263	-0.0124525	0.00313254	-0.0042621	-0.00798005	0.0281261	0.0686619
chr11_100297625_100308468:+	-0.0240616	-0.0213207	-0.0161033	-0.00566945	-0.0252518	0.00411857	-0.0174156	-0.0122601	-0.0151294	-0.0299584	-0.0105339	-0.00239161	0.0158204	0.0271792	-0.00347599	-0.0353503	0.0426679	-0.0315683	-0.0151143	-0.0173643	0.0156433	0.0093372	0.0359602	-0.0150104	-0.0310175	-0.0302921	0.00548594	-0.0167805	-0.0106617	0.00125168	-0.0210589	-0.0201075	-0.0257368	-0.0294656	-0.00885174	-0.0336118	-0.0249779	-0.0268753	-0.0171727	0.0523536	-0.0308705	-0.0297769	-0.0287713	-0.00248981	-0.0419882	-0.00110895	0.0269498	-0.0392213	-0.0251202
chr11_107390074_107418287:-	-0.00537555	-0.0137627	-0.0206041	-0.0183364	-0.00694539	-0.00412644	-0.00918888	0.00263717	0.0015859	0.0214392	-0.0196217	-0.0210723	0.0141257	-0.0210719	0.00607796	-0.0172745	0.0107882	0.0119365	-0.0200691	0.0291942	0.0184342	0.0371256	0.0467654	-0.0111138	-0.0177948	0.0147917	0.0347536	0.00717278	0.0260276	0.0856472	-0.0284801	0.0261898	-0.0191952	-0.00769094	-0.0218302	-0.00256032	-0.0249507	-0.0153606	0.0222232	-0.0044358	0.00381356	-0.00751877	0.0147853	-0.013712	-0.0151017	-0.010755	0.00963744	-0.00618432	-0.0145305
chr11_108046270_108054955:+	-0.152477	-0.0944475	-0.0744614	-0.132511	-0.0937926	-0.0152658	-0.116029	-0.0823463	-0.106557	-0.00249766	-0.056198	-0.167	-0.0555564	-0.060792	-0.0826555	-0.0975209	-0.0574882	-0.109162	-0.080852	-0.084633	0.00887202	-0.0518722	-0.0807058	-0.0702841	-0.12984	-0.143396	-0.128612	-0.0703404	-0.122317	0.0406148	-0.125034	-0.061854	-0.101961	-0.147879	-0.127437	-0.0760431	-0.0624442	-0.0899078	-0.149102	0.0157156	-0.0984497	-0.134994	-0.0399675	-0.0717905	-0.132746	-0.161591	-0.122776	-0.08388	-0.0998524
chr11_117152441_117163892:+	-0.00392588	-0.00219926	-0.0234448	-0.0385275	-0.0183724	0.00947654	-0.0318053	-0.0228181	-0.0296558	0.0289413	-0.030914	-0.0160551	-0.0256335	0.0354882	-0.0363724	-0.00669942	-0.0197419	-0.0361402	-0.0264789	0.0195881	-0.0339305	0.00612581	-0.0338664	0.011785	-0.00285127	-0.0346229	-0.00102711	-0.0250775	-0.0287174	0.012123	-0.0228501	-0.0181099	-0.0303818	-0.0332144	-0.031563	-0.0238651	-0.0237753	0.0378308	-0.0312496	-0.00161521	-0.021527	-0.0126588	0.0357396	-0.0225198	-0.00498087	-0.0115886	-0.0122555	0.00569072	-0.00872723
chr11_120406118_120409450:+	-0.0860174	0.012267	-0.0250375	-0.0380791	0.00990667	0.00129639	-0.00584314	-0.014714	-0.0263619	-0.0117215	-0.047082	0.0203402	-0.0149961	-0.000430607	-0.0405262	0.00848307	0.01345	0.0309804	-0.0112956	-0.0143013	0.00545243	-0.0515554	0.0628365	0.0241502	-0.0192815	-0.0366306	-0.0227981	-0.0283957	-0.0251649	-0.0452283	-0.0266157	0.00772068	-0.0424371	-0.0120865	-0.0391986	-0.0242252	-0.0342837	-0.0187224	-0.0335926	0.0241684	-0.0100467	-0.0226847	-0.0310489	-0.0528711	-0.00556429	-0.0260777	0.00149811	-0.0201334	0.0360208
chr11_120474560_120477526:+	-0.0916323	-0.0602453	-0.080475	-0.0731934	-0.0988173	-0.0354577	0.0339203	-0.0438249	-0.123498	-0.127503	-0.0290015	-0.0796443	-0.0933932	-0.103816	-0.0134507	0.0093704	0.179269	0.12079	0.0575844	-0.0232893	-0.0232056	-0.0688538	0.0635724	-0.0174087	-0.0906656	-0.0352955	-0.0080952	0.0610722	0.0459809	-0.0788714	0.0269701	0.01154	0.00184081	0.0140235	-0.0541108	0.134683	0.0647815	-0.016449	0.122256	-0.00882202	-0.128609	0.0020366	-0.122258	0.0793067	0.129666	0.0330499	-0.00544117	-0.1302	-0.0815873
chr11_120475340_120477526:+	-0.0194887	0.0425729	-0.0491104	-0.021147	-0.041287	0.027299	-0.0532124	-0.0519814	-0.018648	-0.0354054	-0.0484075	-0.0270666	-0.0220458	0.00462926	-0.00712012	-0.0235821	-0.0387558	-0.051307	-0.0330678	-0.0557127	0.0386128	-0.0358026	0.015038	0.01991	-0.0328437	-0.0451502	-0.021542	-0.0453541	-0.0481569	0.00348091	-0.0089571	-0.0114601	-0.0313856	0.000897068	-0.048641	-0.0358892	-0.020049	-0.00930694	-0.0429884	-0.026503	-0.0195257	-0.0446218	-0.0463738	0.00625508	0.00120913	-0.0405973	-0.0223882	-0.0297942	-0.0130782
chr11_121045674_121060085:+	-0.0465855	-0.034744	-0.0267772	-0.0404737	-0.0248773	-0.018196	-0.0243978	-0.0348724	-0.0261637	-0.0166064	-0.0424307	-0.0275986	0.005039	0.0356614	0.000892889	-0.00621472	0.00593819	-0.0321184	-0.0265982	0.0154636	0.015014	-0.00905225	0.0170524	0.00396562	-0.0221687	-0.00185804	-0.00977691	-0.0619939	-0.0297182	-0.0381688	-0.0368242	-0.0219044	-0.00461985	0.0106151	-0.0077175	-0.0227748	-0.030244	-0.018722	-0.0387231	-0.0230978	0.0208332	-0.0412766	-0.0352309	-0.0357031	-0.0126141	-0.0360698	-0.0256157	-0.0234199	0.00425514
chr11_129062280_129066868:-	-0.0189378	0.0160228	-0.0147749	0.0048345	-0.023577	0.0157186	-0.0233126	-0.021116	-0.0261963	-0.0334128	-0.0156232	-0.0239158	-0.00423088	0.0339083	-0.0269381	-0.0271516	-0.0238282	0.0333693	-0.0012426	-0.00201049	0.00917192	0.0154073	0.0339193	-0.0207693	-0.00140092	0.0140809	-0.00701545	-0.0205386	-0.0205171	-0.00395616	-0.0204951	-0.0144473	-0.02365	-0.0218981	-0.0235884	-0.019594	-0.0218249	-0.0201644	-0.0115933	-0.0210439	-0.0243566	-0.0243879	-0.0291542	-0.0245953	0.00976344	-0.0214054	-0.0157453	-0.00393477	-0.0217864
chr11_129123446_129164427:-	-0.103152	-0.019836	-0.134537	-0.027948	-0.0994757	-0.103932	-0.2943	-0.146722	-0.19364	0.0541929	-0.249441	-0.212703	-0.130375	-0.0239701	0.0214455	-0.0547135	-0.178338	-0.132521	-0.161925	-0.21091	-0.0818437	-0.146383	-0.282844	-0.193656	-0.0548429	-0.134867	-0.200488	-0.201763	-0.151376	-0.0284645	-0.194004	0.0820857	-0.194737	-0.0871809	-0.0710621	-0.139045	-0.196393	-0.148814	-0.22054	-0.176911	-0.177132	-0.195953	0.0142643	-0.203678	-0.130448	-0.226352	-0.149742	-0.190133	-0.142929
chr11_130260856_130261929:-	-0.132111	-0.118025	-0.088661	-0.236617	-0.238077	-0.179928	-0.242657	-0.200409	-0.185952	-0.179293	-0.224966	-0.19876	-0.167175	-0.0245702	-0.144473	-0.0105918	-0.210719	-0.17034	-0.236411	-0.205436	-0.102586	-0.115467	-0.111624	-0.237444	-0.134059	-0.207391	-0.114033	-0.186297	-0.0769962	-0.135739	-0.16398	-0.169427	-0.212495	-0.168537	-0.170824	-0.230283	-0.139211	-0.124212	-0.232912	-0.199884	-0.19644	-0.232208	-0.198937	-0.166545	-0.132091	-0.203318	-0.199254	-0.174486	-0.197737
chr11_13413530_13421838:-	-0.1243	-0.096234	-0.137594	-0.183962	-0.0797055	-0.0954181	-0.0771978	-0.150523	-0.0742071	-0.173928	-0.149005	-0.0157776	-0.116002	-0.214637	-0.0648787	-0.111865	-0.049425	-0.080623	-0.137285	-0.156193	-0.246055	-0.0786758	-0.0992383	-0.0431586	-0.0664019	-0.150464	-0.0924973	-0.0387262	0.0134646	-0.124845	-0.0907967	-0.0657	-0.0543541	-0.149982	-0.0891749	0.0380426	-0.127637	-0.0806862	-0.181958	-0.199288	-0.170078	-0.175505	-0.127454	-0.110319	-0.039984	-0.0557281	-0.0530932	-0.120179	-0.122244
chr11_13413530_13445181:-	0.0232662	-0.000935395	-0.0322904	0.021139	-0.0129892	0.022507	-0.0422595	-0.0286998	-0.0203674	-0.0337254	-0.0106848	-0.0367873	-0.0555316	-0.00572854	0.0470813	0.0163837	-0.0380683	0.0119101	-0.0329368	-0.0253908	-0.0149115	-0.042171	0.0174549	0.00249793	-0.0493632	-0.0362941	0.00928206	-0.043238	-0.0440685	-0.043952	-0.0363296	-0.0123171	-0.00717968	-0.0394018	-0.0460623	-0.0339714	-0.0441254	-0.0342635	-0.0288481	-0.0418023	-0.0348552	0.000118573	-0.0121269	-0.0355208	-0.0344574	-0.0311828	-0.0196957	-0.000997137	-0.0307423
chr11_17988597_18008076:-	-0.0181069	-0.0136942	-0.0320401	-0.028284	0.00640538	-0.000726006	-0.00202905	-0.00315947	-0.013763	0.0370685	-0.00724861	0.00200189	-0.00406584	-0.030834	-0.00254224	0.000811119	-0.0144122	-0.0292411	-0.0231746	0.0134966	0.0637697	-0.00627583	0.0276625	-0.030544	-0.00882471	0.00167676	0.0148547	-0.0152051	-0.0178679	-0.0183682	-0.0120954	0.0283377	0.045217	-0.0234838	-0.0271265	0.000459678	-0.000887778	-0.0175438	-0.0135148	0.0126629	0.0168658	-0.000268509	-0.00300822	0.00512751	-0.0132536	-0.0184007	-0.00952939	-0.00773089	-0.0105394
chr11_18291442_18292976:-	-0.000639715	-0.027516	-0.0491165	-0.0347661	-0.0307582	-0.040834	-0.0240591	-0.0248391	-0.0509503	-0.0554877	0.0166809	-0.0424843	-0.0265302	-0.016564	-0.0304007	-0.0540192	-0.021539	-0.00922073	-0.0393121	-0.0518024	0.0274502	0.0540533	-0.0367593	-0.0328478	-0.0266025	-0.0299969	0.00297786	-0.0401135	-0.0104887	-0.0282228	-0.0871411	-0.0148748	-0.0278455	-0.0498604	-0.0353406	-0.0195519	0.0460172	-0.0403889	-0.0220456	-0.0383198	0.0126918	-0.0217885	-0.0515774	-0.0181977	-0.00421638	-0.0559353	0.00838832	-0.0497913	-0.0152322
chr11_20937786_20960560:+	-0.0520768	-0.0431908	-0.0130279	-0.0233028	-0.0116992	-0.0268426	0.0233396	-0.0116427	0.00556389	-0.0506923	-0.0056657	-0.0314635	-0.0150334	-0.0462533	-0.014542	0.0160651	-0.00415649	0.00240896	0.0154172	-0.0201011	-0.0360623	-0.0376205	0.00727882	-0.0151422	0.00237214	-0.0367473	0.02262	-0.0285453	0.0697124	-0.0412714	0.00514782	-0.0104762	-0.0245267	-0.0101287	-0.0408019	-0.0139516	-0.0366919	0.0149353	-0.0212484	-0.0580555	0.0205801	-0.0396827	-0.010773	0.031968	0.0164561	0.0161093	-0.0041619	-0.0457166	-0.0173072
chr11_32927157_32935435:+	-0.0246212	0.00908649	-0.033173	-0.0196369	-0.0188291	-0.026214	-0.0175915	-0.0234641	0.00458643	-0.0216848	-0.029063	-0.0224872	-0.0155261	0.0182575	-0.0188549	0.00262283	-0.0231015	-0.00979105	-0.0284262	-0.0147294	-0.00618144	-0.00609224	0.00224045	0.0228553	-0.0292402	-0.01231	-0.0185012	-0.0237789	-0.0114992	-0.00429049	-0.0354972	-0.0215863	0.0147078	-0.0444758	-0.0118099	-0.0195732	-0.0190263	-0.0103871	-0.0184511	0.00195397	0.00493358	-0.0213931	0.00339103	-0.00201001	-0.00540907	0.00238397	-0.0223776	-0.00404827	-0.0332673
chr11_33286413_33287511:+	-0.854727	-0.417829	-0.928008	-0.592561	-0.831261	-0.83493	-0.890757	-0.593724	-0.885988	-0.516574	-0.870194	-0.580325	-0.521194	-0.414127	-0.687065	-0.634913	-0.435115	-0.800411	-0.705546	-0.704211	-0.610959	-0.6715	-0.26172	-0.485592	-0.518372	-0.579112	-0.51703	-0.80438	-0.575859	-0.515884	-1.17845	-0.574341	-0.475958	-0.529176	-0.443461	-0.835028	-0.640193	-0.790658	-0.791427	-0.513753	-0.72353	-0.769067	-0.555094	-0.685601	-0.616817	-0.998545	-0.812028	-0.5641	-0.496182
chr11_33551040_33552241:+	0.0351888	-0.00176516	-0.00919692	0.00656855	-0.00534326	-0.00606795	0.00736106	0.00722476	-0.0136615	-0.0292173	0.0199859	-0.0191591	0.00851305	0.0179708	0.0340419	-0.0265658	0.00363522	0.00553842	-0.00901192	-0.00956258	0.02131	0.0435535	0.0825523	-0.00221135	-0.00344003	-0.0280716	-0.00980115	0.0568681	0.0127806	-0.00260532	-0.0107263	0.0276569	-0.0220116	-0.0107671	-0.0194282	0.00321554	-0.0178569	-0.0182392	0.0287396	0.0429535	-0.00824235	0.00457359	0.00570497	0.047867	0.00957801	-0.00814427	0.0203067	0.0182122	-0.0190432
chr11_34071726_34076642:+	-0.0267464	-0.0483029	-0.0591388	-0.0752406	-0.0446696	-0.0536658	-0.0379531	-0.0267752	-0.0693096	-0.0584549	0.00681641	-0.0443981	-0.0532156	-0.0658884	-0.061016	-0.0424783	-0.018786	-0.0300635	-0.0700171	-0.0584972	-0.0162335	-0.0367785	-0.0503098	-0.0528574	-0.076233	-0.0514229	-0.022031	0.0502461	-0.0559075	-0.0190049	0.0135173	-0.0629464	-0.0592469	-0.0741752	-0.0669155	0.0334237	-0.0886764	-0.0224791	-0.0406722	-0.0874341	-0.0887372	-0.0521442	-0.0720232	-0.0719408	-0.0558381	-0.0110762	-0.0488804	-0.0703987	-0.0662483
chr11_36227085_36227430:+	-0.0806742	0.0449599	-0.172922	-0.0787963	-0.0365764	-0.0200377	-0.0523358	-0.0549192	-0.0225936	-0.0545318	-0.0371226	0.00738969	-0.0421413	-0.074871	-0.0193453	-0.021559	0.00670883	0.0584143	-0.0295916	-0.0186685	-0.0547388	0.000390302	-0.0260131	0.0107523	-0.0450581	-0.0371436	0.00744933	0.00337705	-0.00047948	0.0209463	-0.0701834	-0.0397031	-0.00558108	-0.0119339	-0.0331883	-0.00143399	-0.0129112	-0.0379052	-0.0485948	0.0448589	-0.0315798	-0.0663041	-0.0397401	-0.0564497	-0.00707047	-0.0258844	-0.0472438	-0.0382659	-0.00170204
chr11_46076754_46092223:-	-0.38697	-0.433278	-0.314064	-0.626438	-0.691446	-0.708711	-0.417871	-0.628961	-0.562603	-0.263982	-0.602424	-0.285104	-0.477954	-0.4192	-0.472666	-0.235638	-0.655702	-0.475437	-0.538466	-0.271642	-0.00595818	-0.465896	-0.0339527	-0.478388	-0.260891	-0.430309	-0.265071	-0.265077	-0.180317	-0.138591	-0.626241	-0.273733	0.104924	-0.325377	-0.572399	-0.246478	-0.599553	-0.277483	-0.500708	-0.368066	-0.290589	-0.604176	-0.125067	-0.418243	-0.308452	-0.665085	-0.333131	-0.635699	-0.618
chr11_58549786_58551232:-	-0.00265085	-0.0179878	0.0482001	0.0663532	-0.050264	-0.0390557	-0.0517639	-0.00350713	-0.0740442	-0.027819	-0.0591874	0.0205944	0.00808323	0.14589	-0.00590275	-0.0354097	-0.0262582	-0.0791107	-0.0448119	0.00998484	0.11966	0.0226495	0.0995168	0.0151337	0.0295173	-0.0300145	0.00840431	-0.0380882	0.0075664	-0.071582	-0.0258677	0.100214	-0.0239307	-0.028633	0.0512348	-0.0828425	-0.0942169	-0.0925817	-0.0571105	-0.0432865	0.0418486	-0.0381123	0.0324897	0.0112751	0.0273417	-0.00160629	-0.00772883	-0.0107158	-0.00915141
chr11_64685646_64685947:-	-0.00885316	-0.0198603	0.0376663	-0.0547842	-0.0254887	-0.00820454	-0.027432	-0.031286	-0.0465809	-0.0479247	-0.0226297	-0.0224464	-0.00682471	0.0202308	-0.0351374	-0.0398341	-0.0130036	0.00398721	-0.0505898	-0.031398	0.000628112	0.00455197	0.0271876	-0.00045322	-0.037492	-0.0247812	-0.0342738	-0.0305073	-0.00220233	-0.0255936	-0.028439	0.00989071	-0.00949466	-0.0300472	0.000752328	-0.00266679	-0.0325581	-0.00978174	-0.00948502	-0.0335176	0.0214008	-0.0253309	-0.0314093	-0.0364477	-0.0315594	-0.0404626	0.00505757	-0.0311977	-0.0235689
chr11_72984088_72989097:-	-0.0194248	-0.0268999	-0.0635442	-0.0206876	-0.0232984	-0.00639429	-0.0148857	-0.0333826	-0.0505595	-0.0615344	0.00661756	-0.02029	-0.0239649	-0.00728427	-0.0582743	-0.0464169	0.00919477	-0.026117	-0.0356007	-0.0146722	-0.0120028	-0.00879697	-0.0325179	-0.0286686	-0.0450302	-0.0207158	-0.0247779	-0.0707589	-0.00886675	-0.0492038	-0.06763	0.0164532	-0.061374	-0.0187357	-0.0403113	-0.0663796	-0.0657798	-0.0129651	-0.0624557	-0.0430744	-0.0302485	-0.041855	-0.0411701	-0.0355583	0.0240464	0.0268134	-0.011284	-0.0671169	-0.0455671
chr11_73707420_73718718:-	-0.00937937	0.0405944	0.0202199	-0.021417	0.0272201	0.0118385	-0.00766149	-0.0147314	-0.0271953	0.0388464	-0.0199267	0.0186788	0.015861	0.100753	-0.0376627	0.0540905	0.0376865	-0.00736177	-0.00618845	-0.0443819	0.0177884	-0.0176386	0.0152834	0.0193689	0.00271263	0.0492963	0.0346457	0.0289337	0.068219	-0.0165304	0.0102989	0.032677	-0.0102439	0.0732406	-0.021715	0.0272617	0.0339716	-0.0131354	0.0120113	-0.0344509	-0.0180259	-0.0138246	0.0548814	0.0186494	-0.00468298	-0.0157038	-0.0167946	0.00920703	0.0326179
chr11_74789626_74817714:+	0.0272701	0.0526798	0.0182524	-0.000773793	0.0233574	0.0710701	0.058465	0.0183789	0.0643871	-0.00480549	0.0306104	0.0386505	0.0800397	0.0865282	0.0429569	0.0155996	0.0753401	0.12523	0.0505162	0.0928758	0.0644678	0.0823994	0.146582	0.0469299	0.0305892	0.0156771	0.0814084	0.0385166	0.0846687	0.0588211	0.0444854	0.0482965	0.0853002	-0.00473852	0.0346404	0.14201	0.065531	0.129444	0.0504205	0.0812435	0.0831858	0.0315511	0.0314877	0.0447237	0.0272387	0.0447407	0.250153	0.0134389	0.0227793
chr11_77624963_77625818:-	-0.0136303	-0.140929	-0.127011	-0.0961797	-0.105249	-0.149935	-0.0387233	-0.0515076	-0.120691	-0.154958	-0.0938313	-0.121756	-0.109836	-0.0441794	-0.0818646	0.00610525	-0.123171	-0.0762348	-0.103498	-0.164595	-0.072615	-0.043738	-0.0776868	-0.141559	-0.0696035	-0.115485	-0.149378	-0.152329	-0.0227561	-0.125583	-0.143847	-0.116859	-0.10377	-0.15324	-0.127695	-0.136161	-0.11529	-0.1095	-0.13107	-0.155569	-0.0880026	-0.0920281	-0.127147	-0.054469	-0.117384	-0.0592448	-0.0912642	-0.122342	-0.12701
chr11_77683710_77693611:-	-0.0470542	-0.0642668	-0.0877753	-0.0693877	-0.0604886	-0.0747782	-0.0715591	-0.0699542	-0.0405048	-0.0651787	-0.0696632	-0.0622681	-0.0554985	-0.0673294	-0.0706389	-0.0631849	-0.0482386	-0.0316668	-0.0741697	-0.0364746	-0.0762347	-0.0420909	-0.0550705	-0.0386567	-0.0671911	-0.0697772	-0.0507833	-0.0284501	-0.079104	-0.0236617	-0.0564345	-0.065053	-0.0819296	-0.0329875	-0.0609709	-0.0530038	-0.0430863	-0.0208376	-0.0460441	-0.0584783	-0.0598916	-0.0458699	-0.0637433	-0.0631295	-0.0428455	-0.0547277	0.000286626	-0.0326592	-0.0832164
chr11_77698487_77702495:-	-0.315938	-0.176756	-0.322993	-0.223643	-0.196855	-0.232783	-0.260641	-0.278704	-0.20557	-0.207141	-0.195783	-0.159706	-0.213157	-0.187476	-0.188332	-0.201501	-0.21107	-0.278536	-0.188904	-0.335881	-0.332429	-0.177617	-0.0900109	-0.289696	-0.252966	-0.243025	-0.151648	-0.185596	-0.152489	-0.160123	-0.23736	-0.189172	-0.196654	-0.17281	-0.142781	-0.169166	-0.0638189	-0.222024	-0.177347	-0.183468	-0.203184	-0.282069	-0.244528	-0.0829675	-0.156868	-0.153874	-0.244463	-0.213584	-0.226913
chr11_78465876_78493195:-	-0.00102767	0.00379912	-0.0382946	-0.0243932	-0.0220862	-0.0157979	0.00834231	-0.0279178	-0.0272321	0.00275495	-0.0255577	-0.0341034	0.000344721	-0.0442551	-0.0355786	-0.0367522	-0.0432399	0.0286723	-0.0243074	-0.0122086	0.0485865	0.02179	0.0116908	-0.0259335	0.013026	-0.00367265	-0.0329541	0.00656318	-0.0130541	0.0614771	-0.0376797	0.00327138	-0.049505	-0.04891	-0.0232521	-0.010069	-0.00189996	-0.0303765	-0.0300559	0.0180339	-0.0278439	-0.0234439	-0.0126986	-0.0026408	-0.0307366	-0.00301466	0.0142042	-0.0252759	-0.0374339
chr11_8137378_8140193:-	-0.0094599	-0.0134912	0.0192441	0.026539	-0.0164526	0.0639894	0.0103251	-0.00937645	0.0202656	0.00220884	0.00221688	0.0203448	0.00455398	0.0193468	-0.0168245	-0.0101095	0.0906401	-0.0235285	0.0100383	-0.0227595	0.00981589	-0.00509068	0.0149682	0.00591727	0.0128554	0.00959393	0.0281839	-0.0109787	0.055056	0.00489636	-0.0237329	0.0261208	0.062293	0.0258935	-0.00506892	0.0026765	-0.00176137	0.0537017	-0.00161102	-0.0184044	0.0215477	0.00973682	0.0110909	0.0426976	0.00188739	0.0140649	-0.0059302	0.0116887	-0.0190272
chr11_85974708_86031611:-	-0.00690482	0.032683	-0.0469587	-0.0476347	-0.0299649	-0.0507706	-0.0476127	-0.0215191	-0.0398099	-0.0265462	-0.0547151	-0.0291858	-0.0161113	-0.0293589	-0.0374676	-0.0418997	-0.0488054	-0.049745	-0.0465266	0.0161136	0.049033	-0.0214477	-0.0497402	0.0419045	-0.0403321	-0.0385745	-0.0176407	-0.00101005	-0.018978	0.0359754	-0.0603096	-0.0162647	-0.0267551	0.0228909	-0.0389559	-0.0161742	-0.00741514	-0.0106989	-0.0405624	-0.0387282	-0.0331809	-0.0376025	-0.00150417	-0.032734	-0.0293073	-0.0489781	-0.0335627	-0.0280153	0.00318212
chr11_85996826_86031611:-	-0.190864	0.0154973	-0.221209	-0.0440755	-0.160957	-0.297706	-0.255952	-0.083654	-0.22675	0.0483151	-0.0325284	-0.0105686	-0.0877302	0.285749	-0.271643	-0.0503995	0.148593	0.0468504	-0.0426373	-7.95e-06	0.0496603	-0.261955	0.465525	-0.0341925	-0.0809522	-0.259217	0.0562353	-0.173911	-0.0390368	-0.36248	-0.278506	-0.0535528	-0.0857342	0.189324	-0.0844464	-0.182995	-0.164347	-0.234819	0.0180264	0.0270283	-0.0581289	-0.144008	-0.0739883	-0.0814069	-0.146444	-0.242421	-0.148023	-0.0435996	-0.0369831
chr11_86022367_86031611:-	-0.0165764	-0.0531844	-0.0567732	-0.0576905	-0.0473827	-0.0346517	-0.0593583	-0.0512683	-0.0511005	-0.0162255	-0.0676252	-0.0363583	-0.0304153	-0.00360063	-0.0623664	-0.0260882	-0.0305329	-0.0592788	-0.0473537	-0.0443617	0.0247408	-0.0530598	0.0028132	-0.0227741	-0.0632227	-0.0315795	0.0296064	-0.00189802	-0.0315504	-0.0327685	-0.0483746	0.0059152	-0.0541847	-0.0694138	-0.0101271	-0.0213348	-0.0253332	-0.0284052	-0.051756	-0.0569218	-0.00283248	-0.0261202	-0.000668847	-0.0416286	-0.0303608	-0.0383979	-0.04019	-0.0452953	-0.0558318
chr11_87067694_87091395:+	0.036543	-0.0268417	-0.0193608	0.0496394	0.0219309	-0.0224558	0.0422341	0.0379551	0.0330316	0.0586657	-0.00230356	0.0336908	0.0781411	0.094182	0.106288	0.0280538	-0.0253965	-0.0343361	0.041322	0.0355078	0.0344834	-0.0108736	-0.0194378	-0.0208034	0.0606669	0.002307	0.0795008	-0.0100304	-0.00198812	0.128471	-0.00547057	0.059056	0.101383	0.0233105	-0.00755401	-0.00737331	0.0179887	0.115725	0.0243207	-0.0133074	-0.00212892	0.0242445	0.0117374	0.0269686	-0.0225003	0.0544568	0.0143133	0.0383343	-0.0252026
chr11_92352096_92355404:+	-0.224483	-0.0345635	-0.153406	0.153067	-0.0581931	0.0842243	0.0282607	-0.0900752	0.0561495	-0.0216964	0.0806567	0.0284033	0.0160992	0.0909711	-0.000721815	-0.00538793	0.143507	0.226877	0.0623886	-0.0941035	-0.0621123	-0.0249952	0.157416	0.00443204	-0.0986432	0.104995	0.0996983	0.0308752	0.237242	0.0230036	-0.114062	0.0437274	-0.127044	-0.193862	-0.0683873	0.940225	0.0589964	0.0902438	0.153431	0.100074	0.217388	0.0272508	0.0555873	0.125169	0.298076	0.0987883	-0.00375014	0.0530652	-0.00562334
chr12_100922226_100942535:+	0.0575012	0.106305	-5.27e-05	0.113178	0.0187791	-0.0472996	-0.0151267	-0.00545876	-0.0334768	0.0192745	-0.0293832	-0.0191045	0.0993046	0.147071	0.0595578	0.133268	-0.00940027	0.0385153	-0.0107095	0.119734	0.176412	0.0440945	0.272435	0.0436986	0.0924882	0.0640025	0.156725	-0.0107474	-0.0151084	0.18922	-0.0194772	0.0685262	0.121283	0.034873	-0.00685665	0.0280881	0.0120323	0.00663431	0.0106193	0.00756087	-0.00125063	-0.0139696	0.0929999	0.026508	0.0130259	-0.0254475	-0.0144018	-0.0153526	0.0585745
chr12_100922226_100987670:+	0.0069214	0.0332042	-0.00801508	0.0598946	0.022193	0.0217035	-0.0136181	-0.00127262	-0.0140385	0.0879789	-0.0134755	0.0106888	0.0640524	0.0452053	0.0198233	0.0881941	-0.00921056	0.0419961	0.0156595	0.0724353	0.0450231	0.00486166	-0.00816467	0.0393414	0.0786499	0.0198861	0.0416512	-0.00551978	0.0112766	0.0298264	-0.00828723	0.0357257	0.00718942	0.00993974	-0.00713134	0.0266428	-0.00258866	0.000395066	0.00458218	-0.00262545	-0.00888047	-0.00524315	0.0265934	0.0176878	0.0174489	-0.0106595	-0.00270658	0.00824619	0.0117862
chr12_100971306_100987670:+	-0.00687391	-0.00720836	-0.0121411	-0.0180567	0.0195962	-0.00926639	0.0152327	-0.0059253	0.0150311	0.0231728	0.0272393	0.00484928	0.0102711	0.0436217	-0.0171195	-0.0153557	0.0056472	0.0110076	-0.00047629	0.0658607	0.00469334	0.0287094	0.0110321	0.0242171	0.0145183	0.010404	-0.00148526	0.0359204	-0.00773943	0.00792856	-0.0140718	0.0152267	-0.00492104	0.0487716	0.0200502	-0.00419454	-0.0100971	-0.00788413	0.0265527	0.031333	-0.0141056	0.00193469	0.0310451	0.038698	-0.00829524	-0.00108373	0.00992978	-0.0115184	-0.0102581
chr12_101780152_101790057:-	-0.0196968	-0.0201537	-0.00716497	-0.0122115	-0.00440452	-0.000891084	-0.00896881	-0.0120479	-0.0138947	0.0015673	-0.00479152	-0.0110252	-0.0190306	0.024193	-0.0200256	-0.0163744	-0.0152897	0.024496	-0.00924042	0.0227478	0.00298008	-0.0186887	0.029786	-0.0143647	-0.0163433	0.0186992	0.0234419	-0.00247081	0.0450213	-0.0190538	0.00205241	-0.00546666	0.029861	0.00574893	-0.0174886	0.000546563	-0.0150316	0.0250559	-0.0159214	0.0243028	-0.0185785	-0.00259352	-0.0178749	0.0184761	-0.0197377	-0.0142834	-0.0165452	-0.017919	-0.0293914
chr12_1027748_1028572:+	0.0368203	-0.0109915	-0.000875832	-0.0190043	0.00805915	-0.0242281	-0.0202732	-0.0115786	-0.011003	-0.0195361	-0.0219577	0.0508276	-0.0106919	0.0270654	-0.0125497	0.0118622	-0.00193976	0.0253938	0.00242033	-0.0317606	0.0223403	0.00714812	0.00423084	0.0242948	-0.0240897	0.00719308	0.00303416	-0.0099268	0.0799565	0.00900858	-0.0331836	0.00755826	0.0366187	0.049029	-0.0146073	0.032103	0.0263617	-0.0175072	0.0587446	0.0102	-0.029235	-0.0116091	-0.0186136	-0.0155197	0.00476661	0.0583086	0.00245797	0.0401319	-0.0211149
chr12_106842589_106843947:+	-0.010831	-0.00864488	-0.00244291	0.0179144	0.012944	0.0184167	-0.00272175	-0.0063201	-0.00491338	-0.0126068	0.0438845	0.0189114	0.00702941	0.00925048	-0.0107608	0.0136894	0.0256985	0.000680774	-0.00015639	0.0160892	0.0906312	0.00841662	0.0146097	0.00130766	-0.0111074	0.0190717	0.00621681	0.0227423	0.0394296	0.0307515	-0.0138975	0.0179719	0.0500135	-0.00692692	-0.00891668	-0.00804524	-0.00897668	0.0169729	0.0042835	0.0305587	-0.0110242	-0.00883521	0.0116359	0.0136724	0.0242555	0.0217917	0.0114875	-0.0132569	-0.00512918
chr12_108652272_108654410:-	-0.020499	0.0906701	-0.0402113	-0.053066	0.0404429	-0.0544491	0.049258	-0.0617987	-0.0421752	0.03656	0.0912588	-0.00236762	-0.0337989	0.0715273	-0.0606403	-0.0180372	0.156629	0.105491	-0.00217156	0.0610722	-0.0634682	0.0162299	0.0483943	0.0225097	-0.0617036	-0.063749	0.0233249	0.0799579	0.0668838	-0.0505899	0.0473912	0.00117481	-0.0867506	0.0889196	-0.0647724	0.00463922	-0.00974913	0.124828	0.0270904	0.0563241	-0.0399387	-0.0290148	-0.1168	0.0290594	0.189275	0.102195	0.0519967	0.0177676	-0.0788869
chr12_110485078_110487943:+	-0.00060639	-0.0108265	-0.00887024	-0.0174753	0.00209943	0.00462902	-0.00962248	-0.00642914	-0.00770408	0.0148207	0.00388487	-0.0203287	-0.0119151	0.0567483	-0.0110578	-0.0126674	0.00874588	-0.0125728	-0.00260107	-0.0109333	0.0230642	0.0111955	0.0192633	-0.00809888	-0.0142455	0.00907592	-0.000917475	0.0069627	0.00076472	-0.0128697	-0.011153	8.4e-05	-0.026255	0.049593	-0.017607	-0.0141491	0.00569477	0.0267943	-0.0176392	0.0232422	0.00823635	-0.0220347	-0.00917172	0.0543403	-0.000894431	0.000122491	-0.00223724	-0.00416079	-0.0227072
chr12_111552280_111555919:-	-0.0966549	-0.000962904	-0.0554495	-0.0302604	-0.0534835	-0.0809325	-0.0606523	-0.0714082	-0.0586451	-0.0657854	0.0174416	-0.0374458	-0.0117601	-0.0581467	-0.0541371	-0.0196829	0.0380423	-0.0517084	-0.0254374	-0.0474194	-0.0370871	0.131622	-0.000615042	-0.0270194	-0.0467006	-0.0580929	-0.0582343	0.0735592	0.00421693	-0.0306346	-0.00252886	0.0409396	0.00247188	-0.029315	-0.0167877	-0.0417161	0.0303249	-0.0621493	-0.0449026	-0.0640303	0.0872177	-0.0518775	-0.0202395	0.0888091	0.140557	-0.0536182	-0.00517681	-0.0851837	-0.0336075
chr12_111933886_111943369:-	-0.0279887	-0.0155284	-0.016059	0.0164394	-0.0239129	0.0350758	-0.00649099	-0.00868605	0.00329923	-0.00963269	-0.0273575	0.0159852	0.00967313	-0.0286343	-0.0234367	-0.0255124	0.0299899	0.0284947	0.000937476	-0.0252871	0.0420894	0.0119894	0.0466923	-0.0245813	0.0251181	-0.00406009	0.00286026	-0.0229356	-0.0179709	-0.0212192	-0.00961759	0.0122636	0.0333328	0.000230423	-0.0068049	0.00129107	0.00757279	0.0012442	-0.023168	-0.0206242	-0.0232031	-0.00821395	-0.023238	-0.0211374	-0.00546457	-0.00854793	-0.0151955	-0.0211803	-0.0235423
chr12_112319225_112319742:-	-0.0251685	-0.00256336	-0.00703706	-0.037901	-0.00738269	-0.0322877	-0.0285453	-0.0245849	-0.0355775	-0.0222148	-0.0231564	0.00224109	-0.0164615	-0.0162025	-0.00718493	0.0140342	-0.0302591	-0.0231742	-0.00574976	-0.0285595	-0.0102538	0.0142294	-0.00638838	-0.0331433	0.0112913	-0.0402092	-0.0101752	-0.0110558	0.00563509	-0.00937088	0.00452836	-0.023333	-0.0233983	-0.0223205	-0.0124149	-0.0240222	-0.0013541	-0.00769386	-0.0371577	-0.0292738	-0.0146019	-0.0219913	-0.0155625	-0.0166448	0.031826	-0.0464317	-0.0240415	0.00314062	-0.0322104
chr12_1180540_1190052:+	0.0197987	0.000262361	0.0860354	0.00876904	0.00681408	-0.0065232	-0.00861963	-0.0168337	-0.0242736	-0.0167289	0.0151402	0.0283096	-0.00560008	0.0155547	-0.0123958	-0.00233683	-0.0208897	-0.0141672	-0.0295711	0.0316279	-0.00184492	0.00504308	0.0487608	0.0122169	0.000108281	0.0353501	0.0315351	0.0175865	0.0234214	0.0498015	-0.0165456	-0.0207826	0.0145457	0.00662663	0.0135999	-0.0139598	-0.000836201	-0.0219826	0.00349302	-0.0193451	-0.021477	-0.0196833	0.00513513	0.0101339	0.00439882	0.00855647	-0.000302775	0.0110998	0.0249704
chr12_120154970_120155719:-	0.0518182	0.0168051	0.0420127	0.0688096	0.00677864	0.103131	0.0371485	0.0213838	0.00459978	0.0362823	0.0227477	0.0441156	0.0204831	0.0139974	0.033604	-0.00409274	0.0355608	0.0199289	0.0345548	0.00361822	0.0533129	0.0573775	0.0604721	0.0482895	0.0266887	0.0332549	0.0630733	0.0259211	0.0884396	0.0343928	0.0176345	0.0347522	0.0566805	0.0054539	0.0300867	0.00660449	0.0334952	0.094829	0.0651736	0.0238729	-0.00283767	0.0285403	0.0472932	0.047194	0.0949251	0.0447476	0.0547099	0.0351762	0.0379849
chr12_12244262_12244655:-	-0.0190426	-0.0125077	-0.0358516	-0.010923	-0.0317914	-0.0140939	-0.0517032	-0.0340209	0.0163272	-0.053296	-0.0445841	0.0647872	-0.012577	-0.0138944	-0.0318122	-0.00655708	0.0424487	-0.00478798	-0.0449237	-0.0410118	0.0497878	-0.0126276	-0.00898973	0.0119229	-0.0136198	0.0180444	0.0280223	-0.0164463	0.0459204	0.0100666	-0.00421607	-0.0352306	0.0959345	0.0743735	0.00662198	0.0313503	0.0110058	-0.0127817	-0.0515666	-0.0286588	0.00455198	-0.0350548	0.0144729	0.0586484	0.0645452	0.00614649	0.0547012	-0.0472755	-0.0239345
chr12_123498544_123499536:-	-0.0298722	-0.010188	-0.0580277	-0.104878	-0.0496031	-0.0289638	-0.0300884	-0.0449486	-0.0584227	-0.00810037	-8.5e-05	-0.0459695	-0.000146046	-0.0192932	-0.00593707	-0.0700657	-0.0495986	0.0231368	-0.0466918	-0.023875	-0.0393276	-0.0325549	-0.0486135	-0.0334504	-0.0348709	-0.00260887	-0.0338944	0.00310153	0.00982167	-0.0664303	-0.059643	-0.0150608	-0.0495129	-0.0535383	-0.0615321	-0.0610135	-0.0690691	0.0260223	-0.0141298	-0.051272	-0.0290125	-0.0592918	-0.0314621	-0.0340064	0.0152993	-0.0133205	-0.0572629	-0.0155396	-0.0255248
chr12_124419957_124430787:-	0.0201109	0.0580564	0.0290738	0.016057	0.0222759	0.00598819	0.0111988	0.00804744	0.0486054	0.0600412	0.00260243	0.0152587	0.0383236	0.0810672	0.00936684	-0.00340384	0.0402935	0.0306555	0.00643122	0.0223563	0.0559251	0.045123	0.0425141	0.0139874	0.00659134	0.00249004	0.00555133	0.0215552	0.0625774	0.0426074	0.00374109	0.00490996	0.0126298	0.0168588	0.0228018	0.0527203	0.0214571	0.0121468	0.00596384	0.0284934	0.0628384	0.0220441	0.0695777	0.00675011	0.0392707	0.0597942	0.0208558	0.00327052	0.0213577
chr12_1263034_1290012:+	0.0359748	0.0392964	0.180946	-0.0535938	-0.07572	-0.0852438	-0.098619	-0.0919414	-0.0902295	-0.0801373	-0.137125	-0.050349	-0.0532069	-0.0662327	-0.0639938	-0.0478643	-0.121904	-0.132709	-0.123837	-0.0778409	-0.0939039	-0.00488669	-0.0173983	0.0809606	-0.0918502	-0.0640893	-0.0092242	-0.0156497	0.00758423	-0.0507978	-0.0915805	-0.0511598	0.0952998	-0.0860383	-0.0957792	-0.049308	-0.0999178	-0.0597228	-0.112166	-0.122148	-0.129815	-0.0924332	-0.0777114	-0.0847211	-0.0254264	-0.0102085	-0.027193	-0.0940935	-0.0813699
chr12_1289852_1371977:+	0.148562	0.0539833	0.0718787	-0.0437705	-0.142163	-0.14165	-0.066136	-0.0721794	-0.161247	-0.113531	-0.0795675	0.0209221	-0.0222628	0.0336002	-0.0130046	-0.0649655	-0.136768	-0.0214472	-0.0782288	0.00435792	0.120325	0.070496	0.0225104	0.0963918	-0.0107078	-0.0819287	0.0333741	-0.0162187	0.0281794	0.0794516	-0.0718109	-0.0799026	-0.015131	0.0541659	-0.0611709	-0.0599056	-0.0678994	-0.0139947	-0.0480235	-0.132943	-0.0631722	-0.132923	-0.0470916	-0.00410063	0.041711	-0.0441492	-0.0641433	-0.108302	-0.253793
chr12_1289852_1444750:+	-0.00523179	0.0373994	0.209443	0.00700989	0.00630237	0.0334182	0.0307035	0.0381538	0.0353097	0.0144645	-0.00125967	0.0852406	0.00572841	0.0794897	0.00292807	0.0759918	0.102884	0.0574617	0.0367242	0.0313787	0.0532502	0.0860718	0.016572	0.145897	0.0789226	0.0432503	0.029257	0.0125017	0.155549	0.0497566	0.0381904	0.0380344	0.0842725	0.0591212	0.00706244	0.138811	0.0414118	0.0796359	0.035622	0.00713049	0.0413961	0.00232926	0.125278	0.0415376	0.0828052	0.0310877	0.0305339	0.0684448	0.021366
chr12_129699810_129700698:-	-0.0513449	-0.0863144	-0.0484588	-0.0593033	-0.0658179	-0.0332396	-0.104062	-0.0555049	-0.062787	-0.0216	-0.0748571	-0.0215831	-0.0430509	-0.0658152	0.137959	0.0336136	-0.0745926	0.00111611	-0.091683	-0.0526435	0.0975815	-0.0705632	-0.0616137	-0.0396023	-0.0454022	-0.0879544	-0.0535405	-0.0779052	-0.0695055	-0.00277417	-0.0547707	-0.0239978	-0.0958799	-0.0591759	-0.00965324	0.0317558	-0.0920678	-0.063452	-0.0612207	-0.0882201	-0.080633	-0.104699	-0.0396003	-0.0647887	-0.0307364	-0.0720126	-0.0355447	-0.0521485	-0.0660321
chr12_130399679_130422561:-	-0.0163781	-0.000133392	-0.00285474	0.0122283	0.0067755	-0.015716	-0.00849302	0.00731618	-0.00290874	0.0110665	0.00731373	-0.00961417	0.0147374	0.00610992	-0.010939	0.0131858	0.00933144	0.00737293	-0.0220443	-0.00536035	0.0358167	0.0156146	0.0199555	-0.00781299	0.0125092	-0.00710778	-0.00784651	0.0140657	-0.0222002	0.00145216	-0.004669	-0.00202622	0.0568453	0.00436082	-0.00252417	-0.00284006	-0.00171646	4.39e-05	-0.0165551	0.00280516	0.00699273	0.0442072	0.0164939	-0.00331116	-0.00411072	-0.0327306	-0.00565128	0.0326836	0.00141968
chr12_1371833_1444750:+	0.0348778	0.141127	0.0272608	-0.0291651	-0.00628584	-0.00915873	-0.0249645	-0.0118757	-0.0265777	-0.0279293	0.00224127	0.0720479	0.0286894	0.0887578	0.0423963	0.0304628	0.0340276	-0.0327625	0.0169602	-0.0113196	0.0162726	-0.00831396	0.0311352	0.0647529	0.0590445	-0.0053158	0.0553232	-0.0271961	0.0340071	-0.0169126	-0.0168415	0.0224438	-0.0102646	-0.0111087	-0.0179855	0.165261	0.0688397	0.00125556	-0.0266925	0.0237025	-0.00414297	0.0174129	0.0152264	-0.0235	0.14126	0.0370177	-0.0101447	0.0295701	0.110936
chr12_22484697_22506819:-	-0.0479532	-0.0239814	-0.0681076	-0.0866116	-0.0180037	-0.0714139	-0.0367077	-0.061234	-0.0709422	0.0225397	-0.0661354	-0.0619407	-0.0393875	0.0441436	-0.0602586	-0.0490428	0.00591983	-0.0782535	-0.0366999	-0.0579243	-0.00287311	-0.0430396	-0.0320549	-0.00188451	-0.0326935	-0.00997382	0.00936054	-0.0566738	0.0955887	-0.016645	-0.0631023	0.0147064	-0.0483848	0.0234964	-0.0622866	-0.0188614	-0.00683282	-0.0324484	-0.0578516	-0.0357365	0.00314054	-0.0398704	-0.0444204	0.0377666	-0.0320137	-0.0763803	-0.0517574	-0.0288087	-0.0815227
chr12_22493223_22506819:-	0.00133889	0.0390422	-0.00367566	0.0353019	0.00423465	0.0128747	0.00853095	0.00115455	0.00389489	-0.0079883	-0.00341834	0.00765221	0.0169288	0.0489756	0.0637149	-0.00619193	-0.0075026	0.00799975	0.0143811	-0.00470864	0.0273636	0.0138539	0.0320518	0.00816512	0.0205495	0.0118615	-0.00185186	-0.00914034	0.0220664	0.0383687	-0.00512343	0.0315603	0.00304308	-0.00350293	0.0103832	0.021928	-0.0055638	-0.00325715	0.00624331	-0.00337573	-0.00369288	0.00761722	0.0282541	0.0384808	0.0168204	0.0342838	-0.0024121	-0.00102649	0.018455
chr12_2504436_2512984:+	0.0848668	0.0620298	0.0404059	0.0763937	0.0248214	0.0636789	0.0183201	0.0586091	0.0283948	0.0346694	0.0340415	0.0300312	0.133416	0.108907	0.070146	0.00451482	0.254156	0.0444945	0.0725821	0.0556557	0.0519241	0.0855909	0.0716626	0.162499	0.100716	0.0535414	0.108454	0.0853118	0.119847	0.0894401	0.0510061	0.125998	0.105417	0.104091	0.0436246	0.0852071	0.0510834	0.161824	0.0723289	0.0466218	0.0474375	0.0785399	0.0915873	0.106103	0.118506	0.0830532	0.0107223	0.0589446	0.0372862
chr12_27714780_27724186:+	-0.0616881	-0.015944	-0.0614679	-0.109191	-0.0197695	-0.0843262	-0.0841884	-0.0602533	-0.113882	0.00830048	-0.0217846	-0.0658696	-0.0651449	0.0568816	-0.0875198	-0.0942015	-0.109317	-0.0258569	-0.0925842	-0.0347189	0.102179	-0.0254851	-0.0565102	0.0786702	0.0276715	-0.0794888	0.0439492	-0.14081	-0.122949	-0.0622101	-0.130566	0.0747618	-0.0890666	-0.0173945	-0.13377	-0.134684	-0.0577368	-0.040542	-0.127833	-0.0225025	-0.0680386	-0.104665	-0.0405012	-0.0655935	-0.15483	0.00447623	-0.0581629	-0.0900712	-0.0460674
chr12_28305649_28307749:+	-0.021431	-0.130223	-0.0510625	-0.107862	0.000758633	-0.0748755	-0.114115	-0.117091	-0.162859	-0.145071	-0.129965	-0.14556	-0.0868878	-0.0450093	-0.0913342	-0.00900748	-0.11013	-0.185284	-0.125499	0.0560016	-0.143192	-0.155828	0.0483396	-0.0969798	0.0106165	-0.174496	-0.0851568	-0.126653	-0.0644656	-0.01236	-0.0969977	0.0489385	-0.00913996	-0.0125449	-0.0673542	-0.0811744	-0.112204	-0.112238	-0.186245	-0.0416728	-0.131807	-0.154336	-0.10744	-0.14681	-0.116341	-0.126596	-0.106022	-0.175435	-0.0735728
chr12_28305649_28391411:+	-0.0107158	-0.0282847	-0.0495773	-0.0432383	-0.0389707	-0.0492031	-0.0469751	-0.0274962	-0.035321	0.00925405	-0.000661943	-0.0614173	0.0172028	-0.0110049	-0.0721902	0.00214085	0.00747137	-0.0186359	-0.011702	-0.00565891	0.00102085	-0.0362361	0.116908	-0.0898804	-0.0481495	-0.0723434	-0.0477586	-0.0694353	-0.0597927	-0.0251694	-0.0192584	0.0158178	0.0458265	-0.0468693	0.0247214	-0.00826103	-0.00487995	-0.00134701	-0.0340615	-0.036935	-0.0285494	-0.0330601	-0.0545932	0.00767784	0.034386	-0.0538093	-0.0247533	-0.0523152	-0.0546444
chr12_31442775_31447769:-	-0.0628939	-0.0105378	-0.0676136	-0.0545946	-0.0549229	-0.0608359	-0.045018	-0.0672008	-0.0294597	-0.0784509	-0.0723237	-0.0781559	-0.0710471	-0.0447258	-0.00048754	-0.0778296	-0.0721074	-0.0318507	-0.0605705	-0.0744281	-0.0517653	0.0203661	-0.053443	-0.0176792	-0.046138	-0.0677386	-0.0380352	-0.0189617	-0.0456168	-0.0273793	-0.0264037	-0.0222885	-0.080123	-0.0859399	-0.072588	-0.0665609	-0.0907814	-0.0318053	-0.0869216	-0.0894887	-0.0160798	-0.0700348	-0.0749671	-0.077406	-0.0148003	-0.0182616	-0.0451017	-0.0711292	-0.0603019
chr12_32327461_32328555:+	-0.0210445	0.0143308	-0.0200909	-0.0115675	-0.0469136	-0.0372086	-0.0589657	-0.0489913	-0.0329203	-0.032516	-0.0471712	-0.0322176	-0.051555	0.0661807	-0.0149591	0.0815361	0.0315535	-0.0382957	-0.0414723	-0.0493655	-0.0576396	-0.0286765	-0.046702	0.031788	-0.053941	-0.0321691	-0.0296615	-0.014157	-0.0405412	-0.0597758	-0.0562664	-0.0381215	-0.039924	-0.0197092	-0.0283901	-0.0248336	-0.027657	-0.0295458	-0.0632985	-0.0285949	-0.0117885	-0.0476137	-0.0248842	-0.0405422	-0.0211015	-0.0803119	-0.0164864	-0.0211052	-0.0494101
chr12_40028301_40048210:-	-0.0122844	-0.0137352	-0.0281706	0.050519	-0.0363978	-0.00494102	-0.0389988	-0.0421212	-0.00256876	0.0392766	-0.0337928	-0.0455242	-0.00504047	0.0175959	-0.0540334	0.0589173	0.105609	0.0905578	-0.00269779	-0.0057578	0.0903343	0.0169857	-0.121637	0.086861	0.00326721	0.0249641	0.0150532	0.0791004	-0.0470861	0.0109833	0.0100423	0.00371156	0.0400487	-0.0231428	-0.0235462	0.0301322	-0.0141596	-0.0406462	-0.0455118	-0.0609482	-0.0622763	-0.0641743	-0.0180683	0.0900496	-0.0642831	-0.0111549	-0.0151766	-9.35e-05	-0.00101815
chr12_41014228_41029219:+	-0.00724202	-0.00702879	-0.0212688	0.0154213	0.00929222	-0.00519821	0.00115293	0.00886906	-0.00198979	-0.0235462	0.0323503	0.0232748	0.0137648	0.0417841	-0.00980885	-0.019846	-0.00228808	0.00893489	-0.000289096	-0.0186298	0.00773276	-0.0202874	0.00587732	-0.0256577	0.0237259	-0.0169352	-0.0123039	0.0318905	-0.02365	-0.0196481	-0.000123361	0.0128641	-0.025716	0.0353918	-0.0138904	0.0155035	-0.00826201	-0.0124533	0.0360479	-0.00425519	-0.00111626	-0.00447068	-0.0168101	-0.00858704	0.019206	0.0246309	-0.0109855	-0.0140071	-0.00989246
chr12_42210355_42210680:-	0.0522356	0.00825761	0.0800401	0.0511224	0.00788881	0.0361627	0.051331	0.0529451	0.00947043	0.00764464	0.00957026	0.0230705	0.0431258	0.0606509	0.023113	0.0807958	0.108241	0.00386628	0.0805593	0.050106	0.026963	0.0271796	0.0841345	0.0544457	0.0941899	-0.00782517	0.0402043	-0.00468091	0.058369	0.00259898	0.0289903	0.0304497	0.0677576	0.0547882	0.0400705	0.0572345	0.0375853	0.0259935	0.0447639	0.0226947	0.014153	0.0261869	0.0524332	0.0124572	0.0449043	0.000835035	0.0415416	0.0878648	-0.00336638
chr12_42351885_42398994:+	0.00599582	2.94e-05	-0.0238656	0.0251688	0.00909082	0.00171618	0.0158521	-0.00108264	0.00408048	-0.0313546	0.0105862	0.0199125	0.0481265	0.072241	0.0124484	0.0348277	0.0291936	0.140935	0.0234053	-0.00627535	0.0703934	0.0152563	0.0413474	-0.000937499	0.0209566	0.00810815	0.0407133	0.00555517	0.00303452	-0.0099139	-0.00194185	-0.0378496	0.0295156	0.0395867	-0.0196177	0.0217225	0.0350609	0.0986178	-0.0236068	0.114812	0.00584855	0.0420694	0.0249271	0.0286277	0.0991515	0.0540047	-0.0104154	0.0370681	0.031993
chr12_44665484_44714741:-	-0.0485338	-0.0230889	-0.0227769	-0.038475	-0.0192947	0.0107607	-0.0045196	-0.0300886	-0.0301171	-0.0293251	-0.0266004	-0.017564	-0.0349409	-0.0208272	-0.0385862	0.00789798	-0.00088064	0.00994701	-0.025941	-0.0249586	-0.0399093	-0.038503	0.00139853	-0.0314779	-0.0355464	-0.0381923	-0.029608	-0.0121748	-0.0475105	-0.0240056	-0.0256246	-0.0147892	-0.0336421	-0.0532164	-0.0187735	-0.00230236	-0.0220669	0.032475	-0.0230028	-0.0366061	-0.020836	-0.0393966	-0.0416556	-0.0418159	-0.0497507	-0.0312295	-0.021448	-0.0307957	-0.00834988
chr12_44703726_44714741:-	0.0118707	-0.0297403	-0.0158268	-8.63e-05	-0.00619539	-0.0217681	-0.0272446	-0.0112061	-0.0100544	-0.0244178	-0.0355555	-0.00815619	-0.0184165	-0.038547	-0.0216578	-0.0313997	0.000188	0.0626094	0.00574542	-0.0136544	0.0105581	0.0496621	0.0106314	0.0235001	0.00174756	-0.0247923	-0.00203934	0.0165639	-0.0146165	0.00551163	-0.016224	0.0179645	-0.0239754	-0.0226551	0.0312814	-0.0256681	-0.0383764	0.00451234	-0.0367411	0.0633217	0.0210128	-0.00304843	0.0419189	-0.00235471	-0.0140786	0.0260528	-0.00649363	0.0322127	0.0100608
chr12_46229153_46243314:-	0.00220152	-0.0283686	-0.025922	-0.0268849	-0.0200533	-0.0195822	-0.0143857	-0.0152142	-0.00719463	-0.029313	-0.0255391	0.0222478	-0.0168218	-0.0376083	-0.0376641	-0.0451244	0.0178303	-0.0327384	-0.0243451	0.0234957	-0.0182152	-0.0250584	-0.0349528	-0.00216893	-0.0187645	-0.0460333	0.0046459	-0.019538	-0.04232	-0.0145917	0.0178979	-0.0268241	0.0294164	0.00661693	-0.0307888	-0.0167035	-0.0157082	-0.0272673	-0.0304624	-0.0263795	-0.0294178	-0.0252014	-0.00696641	-0.0335259	-0.00704258	-0.000522992	-0.00985093	-0.030993	-0.0301368
chr12_48939655_48941188:-	-0.104863	-0.0516851	-0.116652	-0.0381436	-0.0978704	-0.0740023	-0.0850954	-0.133762	-0.101633	-0.061344	-0.0983858	-0.0839075	-0.0209101	-0.033068	-0.0563318	-0.0587895	-0.0599229	-0.112313	-0.0637852	-0.0825112	-0.013568	-0.12507	-0.138309	-0.0268349	-0.0705642	-0.0482403	-0.0991586	-0.106978	-0.117158	-0.0981753	-0.110446	-0.0157272	-0.0651831	-0.131998	-0.103522	-0.0624077	-0.138333	-0.0899315	-0.114466	-0.131901	-0.123499	-0.0859712	-0.106726	-0.0856436	-0.106868	-0.0818152	-0.0736896	0.0420607	-0.0982288
chr12_50780140_50809589:+	-0.0239384	0.0285669	-0.00679094	-0.0258629	0.00263627	0.020513	-0.00375604	0.00907453	-0.00529415	-0.0225922	-0.0260121	0.0294119	0.00695738	0.0651564	-0.0120604	0.0335697	0.0258539	0.0333555	-0.0249628	-0.0179399	-0.0139146	0.0293117	-0.00271654	-0.0108588	0.0275758	-0.0105086	0.0630361	0.0190291	-0.00282755	0.0239365	-0.0250033	0.0169639	0.103206	-0.00453432	-0.00768489	0.0262916	0.0107143	-0.0164505	0.00674071	0.000924575	-0.0295669	-0.0175649	0.0190149	-0.00518597	0.00950637	0.00772998	-0.000845478	0.0340967	-0.0157518
chr12_51745903_51751593:+	-0.0145142	0.034843	-0.00668861	-0.0164631	0.00807134	0.00901574	0.021931	0.0195267	-0.0103198	0.0139745	-0.00126447	0.049714	0.0423434	0.040522	0.0516873	0.01114	0.0714427	0.03941	0.0187791	-0.00199038	0.0131502	0.0154253	0.0359211	0.0137942	0.00819016	0.014033	0.0371081	-0.000128263	0.015239	0.00707754	-0.0111725	0.00421986	0.0162854	0.00174457	0.0101117	0.0104587	0.0414364	0.0451039	-0.00348749	0.0558418	-0.0078953	0.0016348	0.0109637	0.0230445	0.00140858	0.00619288	-0.00925234	0.0141515	-0.00352705
chr12_69251129_69262562:+	0.0108985	0.0411282	0.0707922	0.0223899	0.0111813	0.0328238	0.0265242	0.0231622	0.016848	0.00803065	0.0178534	0.0159975	0.0164224	0.045912	0.0147256	0.0337758	0.00887716	0.0203357	0.0165257	0.0117791	0.046973	0.0647185	0.0150146	0.00557792	0.00957839	0.020942	0.0534211	0.0161248	0.041563	0.0436971	0.0274167	0.0137821	0.00941848	0.0422893	0.0365544	0.0258636	0.0231499	0.119764	0.0304577	0.0279959	0.0642043	0.0440244	0.0317728	0.0157712	0.0231401	0.0218993	0.00485262	0.0110383	0.0389346
chr12_69800209_69801721:+	0.0902907	-0.0140345	0.0381097	-0.0944437	-0.0594621	0.0361679	-0.0961227	-0.0277365	-0.12223	0.0294894	-0.135387	-0.0749949	-0.0279503	-0.0462902	0.106637	-0.0388515	0.00530073	-0.107163	-0.124837	-0.0181657	-0.0562914	0.0499218	-0.0260021	-0.0103305	-0.00742379	-0.0333725	-0.00771176	-0.00217391	0.040253	-0.0358897	-0.0937723	-0.00429985	0.096917	0.128297	-0.0275906	-0.0259561	-0.0046312	-0.0296283	-0.077242	-0.0613753	-0.0247141	-0.0392866	-0.0137999	-0.0809535	-0.0056513	-0.0820086	0.0216084	0.00439439	0.0377903
chr12_70684127_70701323:-	-0.018902	-0.0335667	-0.0353042	-0.011983	-0.013161	-0.040115	-0.0267252	-0.029488	-0.0241726	-0.0180979	0.00689273	-0.0293103	-0.0169387	-0.0150505	-0.0312809	-0.0315338	-0.000107196	-0.0377748	-0.0277467	-0.01296	-0.0219853	0.0349159	0.0377683	-0.00118213	-0.00181554	-0.0369991	-0.00292207	-0.00804793	-0.0352756	-0.0389608	-0.0332476	-0.00881235	-0.0125503	-0.0124965	-0.0299013	-0.0264022	-0.0288195	9.9e-05	-0.027393	-0.0109196	-0.0329712	-0.0262263	0.00225334	-0.0209328	-0.00221058	-0.00515242	0.0233926	-0.0271684	-0.000994526
chr12_77966229_77968702:+	-0.0259344	-0.0270547	-0.0268107	-0.0253807	-0.0176318	-0.0301947	0.0223204	-0.0257161	0.0163574	-0.0326491	-0.0157132	-0.00884174	0.00885454	-0.0257205	-0.0205526	0.00302696	-0.00841257	0.000692583	-0.023849	-0.0287452	0.00454177	-0.0260745	-0.0136398	0.00261087	-0.0287051	-0.0223977	0.00875463	-0.0158963	-0.0168612	-0.0255796	-0.0126386	-0.0160066	-0.0222994	-0.0289209	-0.0283469	0.0234647	0.00637396	-0.0278897	-0.0313786	0.0264799	-0.0149029	-0.0371495	-0.0123694	0.0077185	-0.0136555	-0.0191393	-0.0242938	0.00691334	-0.00174909
chr12_79285787_79299551:+	0.0311512	0.026248	0.0340898	-0.00806475	0.00214636	0.030259	0.00205859	-0.0176413	0.000307545	-0.00111105	0.0247181	0.0215657	0.0418139	0.128802	-0.000502089	0.0120833	0.0524336	0.0031196	-0.0141702	-0.00987286	0.0139708	0.0502319	0.0756824	0.0530769	0.0241641	0.0325687	0.0275114	-0.0138914	0.0509051	0.0741604	-0.0152411	0.0804757	0.129931	0.0569441	-0.0154577	0.0175439	0.0229725	0.0084674	0.0117136	0.000685114	-0.0185998	0.00329224	0.0179994	0.0108403	0.061746	-0.0188336	0.0144635	0.000404515	-0.0103469
chr12_79793863_79822190:-	-0.0852235	-0.0762488	-0.10955	-0.115962	-0.100095	-0.137468	-0.149979	-0.118856	-0.0654145	-0.114929	-0.121107	-0.103322	-0.0997992	-0.0390603	-0.0783883	-0.091318	-0.00429597	-0.0741649	-0.103719	-0.0694654	-0.00952922	-0.0858563	-0.0850015	-0.0771306	-0.0992707	-0.0986862	-0.0679439	-0.0676163	0.0326879	-0.0856679	-0.124789	-0.0967391	-0.017799	-0.10942	-0.0829908	-0.0498852	-0.100899	-0.129611	-0.107572	-0.0694982	-0.0337683	-0.126586	0.00302545	-0.0863794	-0.109006	-0.0779759	-0.0818587	-0.0866079	-0.107706
chr12_82857010_82857580:+	-0.0303319	-0.074986	-0.0469582	0.0160253	-0.140869	-0.0554843	-0.0558765	-0.0468114	-0.0761075	-0.0881061	-0.14928	0.0137495	-0.021566	-0.0507769	-0.0905164	0.0254555	-0.0981186	-0.127514	-0.0430948	-0.121319	-0.0274032	0.00160316	-0.00466396	-0.0046577	-0.0311091	-0.0671901	-0.0148688	-0.0863589	-0.0359832	-0.040876	-0.141864	-0.0679437	0.00436283	-0.0307601	-0.067866	-0.0543083	-0.104885	-0.0622457	-0.0547418	-0.0624051	-0.026154	-0.094786	-0.0544142	-0.0610541	-0.0469368	-0.045469	-0.0537473	-0.0427781	-0.00113159
chr12_89619999_89635251:-	0.0197969	0.030213	0.00363172	-0.00104451	-0.0168246	0.0156385	-0.00495094	0.00476284	-0.00428942	0.00460959	-0.00164132	0.0255068	0.0093825	0.037518	0.0344468	-0.0121049	0.0564227	0.0565488	-0.015158	0.0121433	0.0349842	0.0482994	0.0200543	0.0202949	0.0338716	-0.00360736	0.0237021	-0.00687335	0.102673	0.0279909	-0.00974537	0.0467764	0.112316	-0.0318426	-0.0159278	-0.0282298	0.00795813	0.0141774	0.0273971	-0.000405637	0.0192243	0.00290412	0.0175069	0.0427171	0.0681058	-0.0145336	-0.010351	0.0165577	0.00723177
chr12_95208843_95211267:-	-0.0357826	0.045949	-0.0424303	-0.0142316	0.000506858	0.0360983	-0.0349507	-0.030277	-0.0299079	-0.0223114	0.00237552	0.00225233	-0.0145289	-0.0272535	-0.0103005	0.0129572	-0.0448972	-0.0142371	-0.0411695	-0.0151235	0.0726647	-0.0379893	-0.0198261	0.0511056	-0.01997	-0.027658	-0.0268374	-0.0541492	-0.0291619	0.00683441	-0.0421025	-0.0108631	-0.0189817	-0.0338793	-0.0146291	0.00986278	-0.0175783	-0.0386867	-0.0251488	-0.015916	-0.0314097	-0.0357066	0.0221011	-0.0181541	0.00255548	-0.0264598	-0.0162507	-0.028029	-0.0232685
chr12_97492461_97561047:+	-0.267707	-0.128066	-0.237591	0.120953	-0.191501	-0.0857741	-0.102999	-0.00639585	-0.0969187	0.237991	-0.123495	-0.0198839	-0.116312	-0.00864308	-0.0919912	-0.210096	-0.0871118	0.0888101	-0.052402	0.0724204	-0.0347794	0.0149725	0.4088	0.171595	0.0998841	-0.114647	0.0208607	0.070554	0.145459	-0.0866164	-0.202235	0.305006	-0.200474	-0.0686273	-0.057467	0.114181	0.0155319	0.0856317	-0.0303529	0.0334586	-0.00656509	-0.0873813	0.0484343	0.168519	0.0184915	-0.177561	0.108076	-0.0148702	-0.128521
chr12_98773042_98782137:-	0.0227244	0.0440973	0.0577842	0.0764713	0.0518701	0.0664562	0.0572094	0.0837244	0.0600344	0.061984	0.0672877	0.0482263	0.0797353	0.0392466	0.0312636	0.0318314	0.0908353	0.0506999	0.0949532	0.0904444	0.0857607	0.140922	0.0891618	0.0427842	0.0859755	0.107674	0.0684896	0.065558	0.0953061	0.126292	0.0198836	0.101265	0.0814863	0.0331044	0.0355841	0.0495384	0.0446974	0.117952	0.0647829	0.0692618	0.0614841	0.0650316	0.053452	0.0759127	0.0848342	0.0810124	0.056202	0.0606595	0.0402201
chr12_98773042_98801125:-	-0.0152117	0.00801143	-0.0216944	-0.00604364	0.0394566	0.011144	0.0210342	-0.0117122	-0.0202211	0.0177887	0.0246021	0.00505728	-0.0039897	0.0611866	0.00851363	0.00433778	-0.022188	0.0251485	-0.0173217	0.0683544	0.0227945	-0.0203417	0.0417035	-0.0175374	-0.0114908	0.000142535	0.0103032	-0.013854	0.0129806	-0.0120569	-0.0292847	0.0414169	0.0506067	-0.017485	-0.0159416	0.0228285	-0.0277187	0.0122672	0.0324989	0.0151143	-0.00401483	-0.00943006	0.00396125	-0.0185384	0.0143974	0.0474789	-0.0136736	-0.0352494	-0.00685558
chr12_99772922_99782097:-	0.0306237	-0.0226767	-0.0116358	-0.0385893	-0.105716	-0.0525589	-0.0756775	-0.0920112	-0.0746325	-0.016129	-0.0734498	-0.0380918	-0.0162611	-0.000977862	-0.105106	-0.0899513	-0.0781181	-0.128052	-0.136606	-0.0878539	0.0724415	-0.0786411	0.011531	0.00764563	-0.0577637	-0.0662955	-0.00777956	-0.0919131	-0.0567146	-0.0713001	-0.0905576	-0.0266919	-0.0540048	-0.0871324	-0.0886586	-0.124379	-0.047385	-0.0808783	-0.100069	-0.0103306	-0.0703089	-0.0742425	-0.0228762	-0.105941	-0.131577	-0.0533248	-0.0742001	-0.0608382	-0.120716
chr12_99772922_99806700:-	0.000365443	-0.0112564	-0.00658211	-0.0144853	-0.0160359	-0.00994084	-0.0151327	-0.0159343	-0.0141575	-0.0159435	-0.00209223	-0.000893328	-0.00432939	0.0240484	0.00680413	0.0122959	-0.0137161	-0.0162047	-0.00353453	0.00710319	0.00424625	-0.0185121	0.0143247	0.0335981	-0.00171591	-0.00780522	0.0101954	-0.0145306	-0.0205031	0.00698659	0.00511028	0.00237404	-0.0236232	0.0294848	-0.0136502	0.0567208	-0.0148143	0.0466855	-0.0174986	-0.0159915	0.00335861	-0.0170125	-0.0147695	0.00939406	0.0264655	-0.00156231	-0.0105016	-0.00369966	-0.00829465
chr13_100257595_100273346:+	-0.0578192	-0.0260903	-0.100024	-0.0722793	-0.0872113	-0.0766462	-0.128717	-0.0783812	-0.069363	-0.0932121	-0.077619	-0.081294	-0.0966311	-0.100205	-0.0737714	0.00449275	-0.091018	-0.133506	-0.074799	-0.0853454	0.0458833	-0.109176	-0.0860301	-0.101612	-0.0405196	-0.0908517	-0.0846874	-0.105353	-0.0542502	-0.106582	-0.0797745	-0.0427256	-0.0473832	-0.056319	-0.076438	-0.0766113	-0.0742605	-0.0924977	-0.0809128	-0.0914832	-0.105752	-0.0967262	-0.0594133	-0.125385	-0.0308822	-0.101612	-0.0532334	-0.0921612	-0.0655582
chr13_100301460_100449305:+	-0.0120932	-0.0290806	-0.0867193	-0.00508144	-0.0559305	-0.0547786	-0.020506	-0.0652885	-0.0451776	-0.0181506	-0.0185501	-0.0412642	-0.0199785	0.0794001	-0.0363904	0.0312071	0.0272935	-0.0254609	-0.0571433	-0.0530274	-0.0300305	-0.0316756	-0.00540431	-0.0717159	-0.0360182	-0.037293	-0.0332918	-0.0589014	0.047536	-0.030303	-0.0651751	-0.0304126	-0.0378063	-0.0653739	-0.0227176	0.037167	-0.0243145	-0.0247895	-0.0356972	-0.0821073	-0.0608908	-0.0471983	-0.0347548	0.0044249	0.0130472	-0.0233401	-0.042695	-0.0174309	-0.0446561
chr13_101229393_101399165:-	-0.0273678	-0.032274	-0.0255155	-0.0291524	-0.0215419	-0.0262979	-0.0320179	-0.0302309	0.0109993	-0.0357819	-0.029526	-0.0213406	-0.0209229	-0.00339118	-0.0310601	-0.034114	-0.0422429	-0.0171345	-0.0408528	-0.0332909	-0.0100514	-0.0178825	0.00550085	-0.0331267	-0.0389527	-0.0142855	-0.0153498	-0.0348933	0.0310435	-0.0315565	-0.0174091	-0.00699698	-0.0440079	-0.0140684	-0.0153044	-0.0479184	-0.0392919	0.0447332	-0.0298427	-0.0425064	-0.000710132	-0.0236546	-0.0039719	-0.0306649	-0.01626	-0.0242123	-0.0260821	-0.0281196	-0.0370125
chr13_101345266_101378653:-	-0.0197984	-0.0236507	-0.0220243	-0.00923968	-0.0178642	-0.0309478	-0.0260634	-0.0253503	-0.00450053	-0.0294423	-0.0243662	-0.0201539	-0.021342	0.0216164	-0.00632606	-0.00183216	0.00168663	-0.00938622	-0.0328938	-0.0246367	-0.00220174	-0.0274983	-0.0334785	-0.0282861	-0.0196474	-0.0125026	-0.00722226	-0.0138232	0.0361805	0.0147443	-0.0128683	-0.03041	-0.0328128	-0.0320494	-0.0107489	0.000890511	-0.0323716	-0.0398996	-0.0108932	-0.0351031	-0.0125458	-0.0053197	-0.0182044	0.00333701	-0.0207857	-0.0162387	-0.0193576	-0.0286749	-0.03528
chr13_101345266_101399165:-	-0.0496783	-0.0299173	-0.0700451	-0.0838831	-0.0764474	-0.0207556	-0.0596426	-0.0589215	-0.0688407	-0.0598562	-0.0869579	-0.114403	-0.0848889	-0.0255256	-0.0719025	-0.0915069	-0.0457092	-0.138726	-0.0803142	-0.0502126	0.0121766	-0.0634803	-0.0265247	-0.0911517	-0.0952329	-0.0559263	-0.0623452	-0.086967	-0.0350641	0.0119502	-0.0299898	-0.04394	-0.09394	-0.0315072	-0.0699312	-0.113522	-0.103481	0.0219369	-0.105061	-0.0321575	-0.0701372	-0.0848646	-0.0633655	-0.0452847	-0.00320571	-0.0809036	-0.043774	-0.0783857	-0.0582135
chr13_101376700_101399165:-	-0.0867461	-0.0624309	-0.065345	-0.0610304	-0.0705004	-0.0670865	-0.0240251	-0.0761606	-0.0522951	-0.0747367	-0.0663069	-0.068217	-0.0743014	-0.0741463	-0.0839568	-0.0940496	0.0162997	-0.0843598	-0.0902322	-0.0363248	-0.121655	-0.0336727	-0.0609887	-0.0764519	-0.0981098	-0.0779849	-0.126803	-0.084538	-0.0797403	-0.0519272	-0.0290987	-0.084037	-0.0828844	-0.0955697	-0.0829256	-0.0811283	-0.0766108	-0.0654445	-0.0739824	-0.0124196	-0.0312515	-0.0575074	-0.0799887	-0.0459556	-0.0622625	-0.0167336	-0.0757418	-0.0453549	-0.0849547
chr13_101868725_101875296:-	-0.0620661	-0.0450086	-0.0453673	-0.0339996	-0.00978989	-0.0414266	-0.00475694	-0.0326984	-0.0525728	-0.0318779	-0.0385752	-0.0362175	-0.0209254	-0.0292452	-0.011962	-0.0297932	-0.0248247	-0.0137047	-0.0166782	0.00103963	0.00461205	-0.0445928	0.0111652	-0.0216902	-0.0425138	-0.0532971	-0.03809	-0.00651716	0.00793926	-0.0483058	-0.0212632	-0.0189394	-0.035366	-0.0201803	0.00549018	-0.0540918	-0.0273486	-0.0522366	-0.0306403	-0.0194129	-0.0544357	-0.0454173	-0.0543634	0.00480177	0.00382014	-0.0355059	-0.0103948	-0.0401834	-0.0480952
chr13_111205289_111233293:+	-0.00403704	0.0207326	-0.000769892	-0.0106717	0.000382876	0.00897493	0.0236716	0.00436774	0.00299426	0.0112027	-0.00583124	0.0444791	0.000270129	0.0151715	-0.00818219	0.0443575	0.0522841	-0.0106406	0.0268506	0.0130578	0.0293029	-0.003021	0.0301478	0.00895602	-4.19e-05	0.0122362	0.0253967	-0.0139197	0.0464049	0.0170175	-0.00920716	-0.00270008	0.0280623	-0.00117178	0.000422504	0.0423168	0.0409191	0.0216225	-0.000627446	0.0203676	0.033373	0.0258055	0.00525259	0.0493747	0.0281698	-0.00522107	-0.005845	0.0144342	-0.00375867
chr13_112516440_112527484:-	-0.0120552	0.0233987	0.021345	-0.0128537	-0.00711701	0.00620278	-0.025029	-0.0135321	-0.0140851	-0.00816471	-0.0229247	-0.00815376	0.02726	-0.0223525	0.0820688	0.0238979	0.00171033	-0.0136412	0.00755917	-0.0172831	0.00261408	-0.0078675	0.00593336	-0.00564855	0.0133175	-0.00725913	-0.00486209	-0.0217991	-0.00536092	0.0192332	-0.0190883	0.000439764	0.0148259	-0.00804527	-0.0140984	-0.00759304	-0.0131898	0.00829724	-0.00599572	-0.0122595	-0.0220005	-0.0024928	0.0105158	-0.0187626	-0.0171691	0.0130758	-0.0161184	-0.00581845	0.0110412
chr13_20051433_20067390:+	0.0142647	0.0106502	0.00498213	0.0267834	0.0188846	0.0111317	-0.00165856	0.00271825	-0.00484908	0.014853	0.000172968	0.0104145	0.0253267	0.0567531	-0.00711738	0.0216382	-0.00282324	0.0106223	0.00518	0.0158538	-0.00531501	0.0234408	0.0636735	0.000601625	0.00998321	0.0085479	0.0290727	-0.00818887	0.00658118	0.00774654	0.00903876	0.0289011	0.0223549	0.0116655	-0.000615543	0.013656	0.00944935	0.0105477	-0.000306911	-0.00251841	-0.00225707	-0.00117191	0.0145742	0.0145553	0.0097895	0.0084723	0.00232214	0.00168392	0.0109804
chr13_25769046_25774959:+	0.0439535	0.000493936	-0.0262901	-0.0220133	-0.0181109	-0.00616506	-0.0018845	-0.00352304	-0.0129957	-0.0148533	-0.0340443	-0.00488945	0.000558951	0.0259801	0.00207743	-0.0038316	-0.00854102	0.00606997	-0.0195232	0.0174333	0.00904114	-0.000610783	0.0359951	0.0102888	0.00456458	-0.0194887	0.00883695	-0.0212677	0.0131591	-0.00697914	-0.0258983	0.0178881	0.00288856	0.00435385	-0.00810201	-0.0151759	-0.00413129	0.0459733	-0.026056	-0.0193111	0.0116745	-0.0219474	0.00977089	0.0235714	0.0556924	-0.0246583	0.0030124	0.000519082	0.00208454
chr13_26337567_26353880:+	-0.0220258	-0.0106348	-0.0122203	0.0140403	-0.00472588	-0.0146271	0.00529961	-0.00715809	-0.0160132	-0.0164393	0.027346	-0.0101786	0.0101919	-0.0142405	-0.0135991	0.0106131	0.0242394	-0.00225997	0.0119387	0.00596445	-0.0128433	0.0199089	0.00571514	-0.0118717	0.000726074	-0.0153075	0.0127471	0.0213173	-0.0139476	-0.0129676	0.00146811	0.0149307	-0.0203099	-0.0197163	-0.0118247	0.00731762	0.00424831	0.032095	-0.0114706	-0.0100516	-0.0131609	-0.0104359	-0.01242	-0.0126199	0.0159692	0.00237147	-0.00944262	0.00901429	-0.0192314
chr13_28256292_28261458:+	-0.0256982	-0.0263015	-0.065421	-0.0391751	-0.040747	-0.0554766	-0.0477163	-0.0399133	-0.0238544	-0.0296692	-0.0373543	-0.0378746	-0.033152	-0.0489321	-0.04883	-0.0311368	-0.0120813	-0.0185945	-0.054401	-0.0532855	-0.0338169	0.0593813	-0.0263176	0.0112281	-0.0314689	-0.0251932	-0.0260302	-0.0230901	-0.0145086	-0.0368862	-0.0616385	-0.0391653	-0.0435309	-0.0249543	-0.0277344	-0.000158479	-0.0309364	-0.0247678	-0.049089	-0.00823897	-0.0131279	-0.0473279	-0.0281508	-0.0301768	-0.0240456	0.0169447	-0.0246347	-0.0257994	-0.0333949
chr13_32517857_32527532:-	-0.0891297	0.0752132	-0.125087	-0.187778	-0.210008	-0.0383793	-0.185993	-0.240951	-0.281377	-0.131663	-0.197487	-0.109431	-0.151446	-0.0973118	-0.127221	-0.00936767	-0.0502186	-0.166125	-0.281156	-0.160612	0.243964	-0.0526616	0.285574	-0.0242034	-0.337611	-0.356431	-0.095081	-0.201422	-0.14564	0.0270026	-0.314552	0.0220076	0.118393	-0.184275	-0.172397	-0.132894	-0.250426	-0.239455	-0.16767	-0.0368381	-0.119743	-0.345831	-0.132859	-0.115632	-0.0458876	-0.23293	-0.130583	-0.178573	-0.151613
chr13_39694634_39727548:+	-0.00601757	0.0182367	0.0316077	0.0187887	0.0361641	0.0850888	0.0460197	0.0217663	0.0424803	0.0345002	0.0129848	0.0723138	0.0173546	0.0516396	-0.00235642	0.0843011	0.0807606	0.0535954	0.0596875	0.0211369	0.0715666	0.0836701	0.0532507	0.0416079	0.0421106	0.0110627	0.0724941	0.0868713	0.140925	0.0392248	0.0305766	0.0200016	0.0584754	0.0430541	0.0217134	-0.00383677	0.0652934	0.0905703	0.0280557	0.0857063	0.0819415	0.0264102	-0.00464573	0.0826306	0.15382	0.0417342	0.000842214	0.0773897	0.0347961
chr13_42168440_42190525:+	-0.0882025	-0.0821147	-0.103121	-0.101863	-0.0539029	-0.080721	-0.0872367	-0.0813615	-0.0999327	-0.0572529	-0.0750237	-0.0713255	-0.0540872	-0.0285653	-0.0786503	0.0442738	-0.0456812	-0.0605782	-0.0878984	-0.0464625	0.0259506	-0.0881105	0.00470092	-0.0767764	-0.0540976	-0.0810758	-0.0365768	-0.0901327	-0.0906892	0.0168515	-0.099843	0.00210926	-0.070822	-0.0676489	-0.0303373	-0.0330845	-0.0644603	-0.0554842	-0.0762845	-0.0916068	-0.0707124	-0.113542	0.000901555	-0.0883037	-0.0138044	-0.114338	-0.0553259	-0.0821976	-0.0924727
chr13_46003139_46020557:-	-0.0277659	0.0209381	-0.0175295	0.000478938	0.0245046	-0.0123415	-0.00960479	-0.0127346	0.00708044	0.0202666	-0.0207649	-0.0342732	-0.0199329	-0.0129583	0.0427762	-0.022367	0.0369266	-0.015544	0.0212265	0.0565952	0.0306479	-0.0304063	0.0119248	-0.00990336	-0.00278001	-0.00160574	-0.0121105	0.00133658	0.0535176	-0.00311757	-0.0252494	-0.010003	-0.0300568	-0.0307313	-0.0236789	-0.00823388	-0.018251	0.00745382	-0.0120374	0.0273459	-0.0139618	-0.0140343	-0.0017866	-0.00129156	-0.0203417	-0.0015027	-0.00149608	-0.0123054	-0.0319485
chr13_46003139_46045513:-	0.00685926	0.0191188	-0.00327921	-0.00545616	0.00678685	0.00688934	-0.00396857	-0.00214624	0.00698996	0.0560087	-0.0010273	0.023487	0.00161112	0.0140537	0.0210487	-0.00726867	0.0147544	-0.00392786	0.0141295	-0.00164553	0.013081	0.0354108	0.00404855	0.00728627	0.00955713	0.00533071	0.0144273	0.0670875	0.00217989	-0.00199832	-0.00269033	0.0154127	0.00529196	0.00359721	-0.00192701	0.0216029	0.0102941	-4.3e-05	-0.00451333	-0.00308391	-0.00299393	-0.00367316	0.0278574	0.000404355	0.0155008	0.004536	-0.00214708	0.0171437	0.003825
chr13_46003139_46045516:-	0.00685926	0.0191188	-0.00327921	-0.00545616	0.00678685	0.00688934	-0.00396857	-0.00214624	0.00698996	0.0560087	-0.0010273	0.023487	0.00161112	0.0140537	0.0210487	-0.00726867	0.0147544	-0.00392786	0.0141295	-0.00164553	0.013081	0.0354108	0.00404855	0.00728627	0.00955713	0.00533071	0.0144273	0.0670875	0.00217989	-0.00199832	-0.00269033	0.0154127	0.00529196	0.00359721	-0.00192701	0.0216029	0.0102941	-4.3e-05	-0.00451333	-0.00308391	-0.00299393	-0.00367316	0.0278574	0.000404355	0.0155008	0.004536	-0.00214708	0.0171437	0.003825
chr13_46723221_46733998:+	0.0302633	0.01427	-0.0540849	-0.00283763	-0.0254609	-0.00935088	-0.0325541	-0.0135419	-0.011382	-0.0105155	-0.0197703	-0.0215791	-0.0226665	0.093132	0.0105793	-0.0263117	0.018735	-0.0211656	0.0342433	-0.0192367	-0.0149323	0.00216186	-8.97e-05	-0.0213575	-0.0131665	-0.0179397	0.00469693	-0.0192595	0.0148049	-0.00824437	-0.0279634	-0.00655417	0.0507243	-0.021817	-0.00398855	0.0646367	-0.00814604	-0.0214714	-0.0173656	-0.00893691	-0.0223778	-0.0134049	-0.017246	-0.0110744	-0.0221579	0.0181345	-0.0180475	0.00854968	0.00410572
chr13_49167244_49175541:+	0.01364	0.0220997	-0.0151548	-0.026227	-0.00630511	-0.00315252	-0.0107167	-0.0154817	-0.010189	-0.0154241	-0.0244502	-0.00182523	-0.00480703	-0.00884561	-0.0153824	-0.0117626	-0.0130032	-0.00398489	-0.0126574	-0.00484832	-0.0183794	0.0328319	-0.00198116	0.00175267	-0.0167917	0.00387668	0.0199485	-0.0165734	-0.0215399	-0.0144477	-0.0310581	-0.00976225	-0.0209811	-0.0215311	-0.0115857	-0.0229651	-0.00519033	0.0513988	-0.00237981	-0.000750169	-0.0247278	-0.0171752	-0.0102128	-0.000455433	-0.00807016	0.0298433	0.00313446	-0.0209788	-0.0256869
chr13_49196877_49198574:+	-0.0466505	0.00247514	-0.0272322	-0.0370229	-0.020154	-0.0288944	-0.0199458	-0.0253353	-0.030545	-0.0337202	-0.0326332	-0.00542461	-0.0307885	-0.0326728	-0.0286789	-0.0218866	0.0025859	-0.0423178	-0.0338588	-0.017887	0.0101268	-0.0305196	-0.0218873	-0.0284794	-0.0333227	-0.0235246	-0.0208368	-0.0175503	-0.0214242	-0.023401	-0.0360314	-0.00228084	-0.019763	-0.0316331	0.00137614	-0.0375681	-0.0273418	-0.0134816	-0.0152044	-0.0245361	-0.00621275	-0.0406201	-0.0147661	-0.0341474	-0.0165497	-0.0249144	-0.0186391	-0.0181189	-0.0348852
chr13_50927407_50949505:+	-0.0786184	-0.0604329	-0.0747006	-0.144816	-0.0598556	-0.113825	-0.0638317	-0.103749	-0.050282	-0.0638104	-0.0696539	-0.0847679	-0.114921	-0.0967966	-0.0928177	-0.0744537	-0.0433787	-0.0820104	-0.014592	-0.167406	-0.111632	-0.0131849	-0.0514277	-0.101203	-0.125895	-0.140941	-0.103424	-0.044673	-0.115006	-0.0356639	-0.10631	-0.0806597	-0.0714643	-0.126495	-0.114733	-0.0924801	-0.0383275	-0.0901545	-0.120149	-0.0859016	-0.0114783	-0.109127	-0.0915812	-0.041416	-0.126551	-0.0854086	-0.0799722	-0.0877604	-0.0663671
chr13_60439688_60467379:+	-0.257729	-0.101498	-0.254283	-0.143072	-0.178944	-0.215712	-0.200154	-0.204906	-0.145984	-0.08782	-0.180241	-0.149233	-0.116213	-0.111405	-0.186813	-0.0899984	0.0467778	-0.190632	-0.178126	-0.240782	-0.186379	-0.122203	-0.114185	-0.150279	-0.160959	-0.187127	-0.127497	-0.170186	-0.191689	-0.182737	-0.112517	-0.209584	-0.145769	-0.16641	-0.189642	-0.19444	-0.138993	-0.137585	-0.171091	-0.146977	-0.166748	-0.172479	-0.136683	-0.110808	-0.208352	-0.17847	-0.177153	-0.100357	-0.168576
chr13_75560753_75569507:+	-0.020611	-0.00857764	-0.0158338	0.0266087	-0.00752276	-0.0183572	0.0274469	-0.00513078	-0.0158298	0.00563578	-0.00150372	0.00134262	-0.00950709	-0.0176734	-0.0203061	-0.0117038	-0.0168413	-0.0184573	-0.0156757	0.0267481	-0.0172141	0.0176359	0.00271502	-0.00265465	-0.0131533	-0.0190725	0.00947183	0.037071	-0.0192813	0.00829913	-0.0156056	-0.00576692	0.0114984	-0.0199561	-0.0140491	-0.0139192	0.0153375	-0.0156471	0.0116555	-0.0140256	-0.0126941	-6.91e-05	0.000820464	-0.000751297	-0.0125518	-0.00815069	0.012007	-0.00136044	-0.000348242
chr13_77719532_77746855:+	-0.0031296	0.0416732	0.010547	0.00485368	0.00596692	0.0130075	0.00193899	0.0132695	0.0167113	0.0208014	0.00601118	0.00112587	0.00738118	0.000200897	-0.00646486	-0.00237324	-0.00220703	0.00394755	0.0532672	-0.001157	0.032748	0.0600832	0.026818	-0.00440655	0.00338098	0.0143075	0.0072561	0.0359765	-0.00513469	0.0475557	-0.000212993	0.0346839	-0.0093737	0.049933	0.0312532	-0.00345813	-0.00154405	-0.00258828	0.0265028	0.0422042	0.0224255	0.00397207	0.0496712	0.0286938	0.0153316	-0.000728538	0.0224552	0.00804018	0.0161586
chr13_77719532_77753358:+	-0.0653866	0.027734	-0.113087	-0.0946252	-0.0232578	-0.0917051	-0.0680107	-0.0443247	-0.0780191	-0.126027	-0.0533064	-0.0596398	-0.0709625	-0.0608059	-0.0493836	-0.0189147	-0.0672978	-0.021181	-0.0992764	-0.159209	0.00787749	0.116577	0.016729	-0.0477183	-0.08757	-0.138164	-0.0569589	-0.0155469	-0.0174802	-0.0347716	0.027378	-0.000436852	-0.107818	0.00849881	-0.0999335	-0.0838703	0.00901996	-0.0363703	-0.0594344	-0.0951203	-0.00973427	-0.049076	-0.00625518	-0.0732405	-0.0664879	0.0759348	-0.0914958	-0.0547954	-0.0627401
chr13_79341123_79344794:-	0.0138607	0.0488519	-0.0105286	0.0327964	0.0208325	0.00366548	0.0110773	0.010502	0.00417201	0.0332922	-0.0179585	-0.00849709	0.00115015	-0.022799	0.0882133	0.0491868	0.0688292	0.0183845	-0.0125242	0.0492967	0.00282383	0.0172018	0.0210684	0.0431252	0.00179798	-0.0213655	0.0760797	0.0151266	0.0263015	0.0266464	-0.00019762	0.0319518	-0.000919082	-0.0142346	-0.0158923	0.0112273	-0.0155292	0.0134374	0.016595	0.0565481	0.0117917	0.00244569	0.0105007	0.0559849	0.0287792	-0.0174656	0.0381444	-0.00703892	0.00321956
chr13_95757644_95763953:+	-0.0721129	0.00972272	0.0146214	-0.0345204	-0.0136022	0.00922799	0.0172765	-0.0186647	0.00579047	-0.00178074	0.0150512	0.0142221	-0.0110377	-0.0208195	-0.0197296	0.0105196	0.11627	0.0297549	0.0544796	-0.0255274	-0.00562425	0.0394625	0.0188441	0.023572	-0.0369939	0.00213814	-0.0115419	0.022557	0.0838997	-0.000433178	-0.0388509	0.0217729	-0.0138142	-0.0257174	-0.0274525	0.0166701	-0.0211452	0.0333442	0.0131129	0.00169331	0.00598434	0.00974436	-0.00479572	0.014036	0.0161644	0.049475	0.0272402	-0.00314985	-0.0385748
chr13_99238427_99244624:+	0.00172564	-5.6e-05	0.0139836	0.0158757	0.0118924	0.0151844	0.0108626	0.0141428	0.0208184	0.0218338	-0.000568436	-0.00126934	0.0167105	0.00535612	0.00337791	0.00171398	0.0232293	0.0151798	-0.00132103	-0.000480828	0.00403819	0.0402778	-0.000365106	0.0174389	0.00394799	0.0308473	0.0283667	0.0349043	0.00441839	0.000399018	-0.000587022	0.0234908	0.0315626	0.00730766	0.00445193	0.00433331	0.0170542	0.00521007	0.0166574	0.0229489	-0.00175133	0.0546135	-0.000606515	0.0101657	0.0159855	0.0160757	-0.000901546	0.0184916	0.00508236
chr14_102019893_102022880:+	0.0160039	0.0452278	0.0315568	-0.00394205	0.00912919	0.00558159	0.0159036	0.00667887	0.00512328	-0.00630371	0.0104558	0.0209696	0.0172452	0.0155547	0.00251424	-0.00427764	-0.00183007	0.00517214	0.0152265	0.0172883	0.00215225	0.0085012	0.0286514	0.0225212	0.0281428	0.00641487	0.00442855	0.0112796	0.0148206	0.0212918	-0.00494112	0.00189331	0.0197649	0.0174731	0.00228555	0.0181063	0.00512929	0.00762685	0.0283717	0.00624135	0.0202237	0.0303016	0.0360854	0.0447538	0.0103127	0.021977	0.0200076	0.00427019	0.0195355
chr14_102040236_102040673:+	0.366388	0.27743	0.43925	0.256808	0.265907	0.334919	0.252145	0.259944	0.185384	0.204298	0.227987	0.306465	0.27397	0.25161	0.34561	0.236228	0.246411	0.250651	0.277559	0.21703	0.314164	0.305751	0.291516	0.253369	0.292196	0.216897	0.250013	0.118675	0.283658	0.288535	0.275924	0.293675	0.318525	0.230686	0.199037	0.295646	0.348941	0.304411	0.281026	0.307059	0.339283	0.261998	0.256866	0.276619	0.423564	0.312371	0.166125	0.226005	0.251313
chr14_103778745_103797518:-	-0.0131417	0.0287856	0.0081079	0.00351988	0.0311967	-0.00659154	0.0424061	0.000485797	0.0361229	0.0145896	-0.00682947	0.00964279	-0.000498065	0.0351774	0.00456567	0.00392691	0.0137051	-0.0128847	-0.0150844	-0.0181793	0.0123179	0.0383315	0.0305814	-0.00307798	-0.000529711	0.0220018	0.00230111	-0.0194409	-0.0109705	0.0253954	0.00961422	0.0323397	-0.0141733	-0.0162233	-0.0138804	0.0160986	-0.0127201	0.059513	-0.0121364	0.00934441	-0.0160756	0.00475755	-0.000310402	0.0242176	0.0238042	-0.00122777	-0.00235784	-0.00170609	0.0404612
chr14_21503173_21503881:-	-0.0324723	-0.0420095	-0.121645	-0.0856018	-0.0885925	-0.0852462	-0.0736502	-0.0597298	-0.076703	-0.0597768	-0.0871952	-0.0649489	-0.0826465	-0.039728	-0.0801681	-0.091509	-0.0314636	-0.108303	-0.0827789	-0.0528561	-0.00293542	-0.0443234	-0.0639602	-0.0490265	-0.0537604	-0.0979393	-0.027831	-0.048759	-0.00480176	-0.0747609	-0.0358762	-0.0696378	-0.0521196	-0.0532173	-0.0397662	-0.079837	-0.0750626	-0.047145	-0.0849585	-0.0294175	-0.0804945	-0.078427	-0.035001	-0.0755426	-0.0688111	-0.0686514	-0.00624247	-0.0823683	-0.112488
chr14_22909483_22911403:-	-0.0975124	-0.0616242	-0.0866806	-0.0973617	-0.0701573	-0.0969167	-0.0784925	-0.080592	-0.079886	-0.0991587	-0.0747738	-0.0882848	-0.0972067	-0.0856126	-0.118403	-0.0830706	-0.0428904	-0.0531912	-0.0909035	-0.0966955	-0.0835139	-0.0141056	-0.0923623	-0.0958737	-0.106301	-0.0881151	-0.114423	-0.0948392	-0.112474	-0.075679	-0.0571768	-0.109802	-0.115179	-0.129699	-0.101886	-0.00212008	-0.094916	-0.0708683	-0.0357968	-0.04727	-0.0898836	-0.0768963	-0.0836863	-0.0702534	-0.11348	-0.0526054	-0.047793	-0.089763	-0.111142
chr14_32090502_32094386:+	-0.0477708	0.00617436	-0.0288314	-0.0530195	-0.031218	0.00474424	-0.0493497	-0.0348198	-0.0503035	0.0276561	-0.0399255	0.0295953	-0.0167214	0.0274975	-0.0238239	-0.0204365	-0.0355965	0.00132453	-0.0445994	-0.0459434	-0.0458383	-0.00704159	0.0309064	0.0227241	-0.0025255	-0.000893751	-0.0378271	-0.0111142	-0.00574987	-0.0380968	-0.0398287	0.0618875	0.02151	-0.0392638	-0.0394603	-0.0415959	-0.0419931	-0.00709061	-0.0366615	-0.0440083	-0.0165689	-0.0180353	-0.0276043	-0.032361	-0.0108848	-0.0575501	0.0123797	0.00220944	-0.0379479
chr14_33215182_33215587:+	-0.0200583	0.0642332	0.013153	-0.0141344	-0.0234901	0.0896452	0.00634876	0.0284792	0.0341324	0.0926213	0.0324449	-0.0397636	-0.0133563	-0.00187086	0.0483187	0.0927763	0.0583087	0.00462306	-0.0316083	0.125995	0.109369	0.0992499	-0.0162086	-0.0138749	0.0600257	0.0425872	0.101203	-0.0167804	0.0748992	0.0991535	0.0520714	0.135163	0.12893	0.0316217	-0.0200188	0.00163325	-0.00412014	-0.0139439	0.00804115	0.0180502	0.0633659	0.03992	-0.0191773	0.021575	0.081893	0.0885981	0.0623115	0.0146472	0.00300234
chr14_39179091_39179462:+	-0.0267842	0.0582846	0.031759	0.0120457	-0.0315619	-0.0123194	-0.0565519	-0.0474989	-0.0488923	-0.0283604	-0.0300469	-0.0234254	-0.0248657	-0.0452254	-0.0303195	0.0162605	0.0599717	-0.0665181	-0.0442365	0.0368272	0.00947244	0.0186053	-0.0547478	-0.0142818	-0.00332456	-0.0396036	-0.00513619	-0.018645	-0.0301256	0.0111318	-0.0601037	-0.0159145	-0.014965	0.00492038	-0.000173539	0.0107942	-0.0541946	-0.0514493	-0.0333065	0.00183908	-0.0295281	-0.0573566	-0.00237295	-0.0209426	-0.016412	-0.0481188	-0.000432336	-0.0387214	-0.0424507
chr14_46920012_47035304:-	-0.0382483	0.0136884	-0.0255117	0.0394686	-0.0260313	-0.0324842	-0.00872472	-0.0280278	-0.0281065	-0.0490023	-0.0446281	-0.0258838	0.00710025	-0.018537	-0.0320019	-0.04075	-0.0014211	-0.0433699	-0.0329282	-0.0280267	-0.017853	-0.0386515	0.0133264	-0.0220163	-0.0231014	-0.0316823	-0.0309022	-0.0123164	-0.0342972	-0.00223841	-0.011141	-0.0387491	-0.0159448	0.0163477	-0.0383576	-0.0390098	-0.0321263	0.0139379	-0.022144	-0.0296296	-0.0134645	-0.0342564	-0.00110551	-0.0348658	-0.0345132	-0.0332907	-0.0201782	-0.0281691	-0.0109032
chr14_49795791_49831361:-	-0.0794569	-0.0445841	-0.102338	-0.0328281	-0.0422354	-0.0163241	-0.0197965	-0.0596961	-0.00806433	-0.045235	-0.0233648	-0.0573321	-0.0127568	-0.073534	0.00172459	0.0271898	0.0429926	-0.0163495	-0.039564	-0.0729236	0.00634478	-0.00714398	-0.0499961	-0.0437624	-0.0669606	-0.00904779	-0.0285178	-0.0301823	0.0114838	-0.0342132	-0.0669164	-0.00802823	0.00228931	-0.0670378	-0.00140135	0.0569213	-0.0419921	0.0332238	-0.066089	-0.037805	-0.0564081	-0.0232918	0.0196036	-0.0635652	0.0911708	-0.0410772	-0.0310823	-0.0439444	-0.0520493
chr14_49825867_49831361:-	0.00496351	-0.0384636	-0.152818	-0.106647	-0.0999925	-0.107983	-0.0598829	-0.0894681	-0.0795784	-0.0560052	-0.105426	-0.0952246	-0.0624727	-0.0135603	-0.131118	-0.056344	0.016826	-0.0275241	-0.0941782	-0.0996071	-0.100958	0.0190616	-0.0550225	-0.0444882	-0.0590005	-0.0575697	-0.0484559	0.0189147	-0.099082	-0.0683828	-0.119895	-0.030642	-0.0516397	-0.0968599	-0.0531132	-0.059669	-0.074868	0.0174458	-0.0197648	-0.0927228	-0.03798	-0.0840156	-0.0538866	-0.0770447	-0.0839289	-0.0886527	-0.0069601	-0.0742914	-0.113287
chr14_50150008_50150230:-	-0.128473	-0.102654	-0.110913	-0.133383	-0.14472	-0.11522	-0.159719	-0.122032	-0.139593	-0.160899	-0.161104	-0.075884	-0.11345	-0.0546003	-0.12806	-0.105387	-0.116034	-0.130305	-0.133766	-0.16069	-0.0774187	-0.108365	-0.117836	-0.0834377	-0.0714827	-0.095174	-0.0407421	-0.167157	-0.110262	-0.139165	-0.156688	-0.0811779	-0.0943224	-0.0887737	-0.128261	-0.100846	-0.123494	-0.13733	-0.152029	-0.12112	-0.129609	-0.141557	-0.133704	-0.117792	-0.101772	-0.117581	-0.141268	-0.0970016	-0.147405
chr14_51022835_51025360:-	-0.00378156	-0.0018138	0.0200179	-0.00528602	0.0142019	0.020123	0.0373132	0.00974468	0.00524019	-0.00553967	-0.00517589	0.0296486	0.0220156	0.0169646	-0.01153	-0.00476576	0.0345081	0.0243894	-0.00329178	-0.00502364	-0.00309872	0.0157093	0.0167803	0.0232907	-0.000727911	-0.0128105	0.00719595	-0.0141656	-0.0100106	0.0367083	0.0267708	0.0172842	-0.00271559	-0.00222768	-0.000949166	-0.00148664	0.0252883	-0.00149746	0.0232602	-0.00294395	-0.00599553	0.0237204	0.0053421	0.00696736	0.0106475	0.0256187	-0.00429727	0.0456003	-0.0117163
chr14_52536719_52544371:-	-0.0595909	-0.0255168	-0.0519326	-0.0204196	-0.0408573	-0.0431853	-0.0512793	-0.0453178	-0.0536708	-0.0441709	-0.0533187	-0.0441286	-0.020426	-0.0419177	-0.037482	-0.0399541	-0.0446437	-0.024939	-0.0456111	-0.0516475	0.0216562	-0.0304672	-0.0646901	-0.0560673	-0.0327939	-0.0636139	-0.0382578	-0.0345795	-0.0391193	-0.0519364	-0.0477497	-0.0499536	-0.061522	-0.0403975	-0.0482964	-0.0193474	-0.0275733	0.059513	-0.0570612	-0.0532211	-0.0520456	-0.0408973	-0.0255534	-0.00608448	-0.0518217	-0.0645827	-0.0195389	-0.026533	-0.0671881
chr14_54702062_54702580:+	0.0125253	-0.0120778	-0.0126386	-0.00208472	-0.00829729	-0.00214932	0.0133426	-0.0155348	-0.00845675	-0.018189	-0.021164	-0.00629024	-0.013045	0.00505528	-0.00535132	-0.0136095	0.00212805	0.0244818	0.00433902	0.0203628	-0.0184725	-0.00527982	-0.00921777	0.0249914	-0.0154596	0.00606276	-0.00545546	0.0127475	0.0136207	-0.0136621	-0.0189445	-0.00424769	-0.00191731	-0.0314111	-0.0139426	0.0772857	-0.00156626	0.0497495	0.0513743	-0.0168097	-0.0004155	-0.0151485	-0.0167142	0.0171847	0.0391954	0.021492	-0.0107395	-0.0108459	-0.0199817
chr14_56585001_56636598:+	0.0429033	0.0320397	0.0138849	0.0975095	0.0431977	0.0747654	0.0385962	0.0242778	0.0185058	0.039139	0.0514254	0.0645862	0.0870089	0.170679	0.0778721	0.0789975	0.137759	0.0517931	0.047951	0.0591785	0.0562895	0.056019	0.0763453	0.0410065	0.0972014	0.0377604	0.135926	0.0409124	0.0234719	0.0720234	0.00640946	0.131267	0.118699	0.0462799	0.0642022	0.0734353	0.0455348	0.0725944	0.0582775	0.0547542	0.0807309	0.0362151	0.0831061	0.0648433	0.0478062	0.0438175	0.0556758	0.0381104	0.0479728
chr14_60796217_60818847:+	0.00232873	0.00271789	0.0140477	0.0295936	0.0156007	0.0068798	0.00973778	0.0242239	0.00971229	0.0179299	0.00205835	-0.000369463	0.0168136	-0.00137168	0.0645093	-0.00414339	-0.00520805	0.00120215	0.00294124	-0.00937018	0.0251745	0.0451119	0.0114229	0.00952186	0.00442205	0.00709478	0.00780565	0.0449576	-0.0102023	0.0222297	0.024527	0.000620216	0.00549324	-0.00456362	-0.00247203	-0.00443951	-0.0122992	-0.000247318	0.047031	0.0108884	0.0138885	-0.0078344	-0.000653196	0.0243618	0.0122879	0.00432781	0.0142301	-0.00442841	-0.00543764
chr14_60796217_60879835:+	0.0207141	0.0317022	0.026446	0.0311787	0.0272159	0.0280671	0.0312559	0.0219013	0.0556704	0.0353212	0.0823339	0.0575198	0.0460755	0.124293	0.042554	0.0373194	0.0594181	0.0273392	0.048483	0.0462739	0.0743937	0.0204746	0.0337317	0.0426002	0.0219194	0.0413882	0.0464403	0.0234367	0.0392776	0.0296266	0.023422	0.0443401	0.0561315	0.0191573	0.0353287	0.0602225	0.0738179	0.0899648	0.0197595	0.0171057	0.0588321	0.0431602	0.0282797	0.0148492	0.103028	0.0423835	0.0225987	0.0734154	0.0374081
chr14_60811987_60879835:+	-0.0112606	0.0406479	-0.0455851	-0.040973	-0.003341	0.0067996	-0.0218291	-0.0166231	-0.0246125	-0.0246709	0.017704	-0.0177294	0.0170925	0.080495	-0.0527774	0.0376435	-0.0219893	0.0065536	-0.0391115	-0.0449131	0.0704194	-0.0372059	0.154284	-0.0179393	0.00318988	-0.0192098	-0.0106958	-0.0444845	-0.0457337	-0.00999808	-0.0439854	0.0554704	0.060348	0.019798	-0.00136906	-0.0440146	-0.00366817	-0.011597	0.0108284	0.0326611	0.0581582	-0.0425719	-0.00205111	0.00159926	-0.00533116	-0.0304245	-0.0261807	-0.0124079	-0.0502061
chr14_65561337_65561766:+	-0.497668	-0.422219	-0.611273	-0.336047	-0.671572	-0.500368	-0.496541	-0.430198	-0.392607	-0.445002	-0.646038	-0.327618	-0.361638	-0.141227	-0.44869	-0.33495	-0.240514	-0.329107	-0.483145	-0.616836	-0.486669	-0.323869	-0.180708	-0.372448	-0.295477	-0.477598	-0.323074	-0.614694	-0.292393	-0.408464	-0.559905	-0.342734	-0.464847	-0.410901	-0.436801	-0.580958	-0.427947	-0.307138	-0.600929	-0.423254	-0.476536	-0.556664	-0.370275	-0.3591	-0.340364	-0.635478	-0.475335	-0.374995	-0.541058
chr14_67269701_67303599:+	-0.0959225	0.0097297	-0.0695494	-0.128621	-0.0780909	-0.0909272	-0.120791	-0.0758872	-0.0674294	-0.052033	-0.0739504	-0.0457303	-0.0673643	-0.109567	-0.0204256	-0.0218689	-0.0359731	-0.0240723	-0.0630282	-0.126732	-0.0272783	-0.0919755	0.0694134	-0.0505129	-0.0773519	-0.101691	-0.00836265	0.0424361	-0.0599444	-0.0955403	-0.138522	-0.0180407	-0.0465916	-0.112593	-0.105166	-0.101704	-0.0729106	-0.095507	-0.0689041	-0.00725217	-0.124197	-0.116136	-0.0105758	-0.00272552	-0.0853566	-0.11734	-0.0548084	-0.0479563	-0.0523149
chr14_71413948_71529370:+	0.033212	0.0226969	0.0132004	0.030902	0.00591206	0.0198798	0.016353	0.0239134	0.00273674	0.0194552	0.00505304	0.0437978	0.0429313	0.0205476	-0.000590292	-0.00263865	0.0202709	0.000894932	0.013509	0.00263856	0.0538381	0.0360688	0.0369333	0.00200814	0.00887064	-0.00436441	0.0381527	0.00923021	0.0263509	0.0201065	0.00219027	0.0225543	0.00318947	0.00200114	0.00625153	0.0248518	0.00239301	0.0741056	0.00438903	0.00523966	0.00503333	0.0191385	0.000804651	0.00907208	0.0178529	0.0201148	-0.00362378	0.00613205	0.00101277
chr14_73147795_73148094:+	-0.00369297	-0.0187285	0.010275	-0.0227127	0.0503098	0.0216801	0.0213992	0.00454192	0.0147501	-0.00178432	0.0907731	-0.00666127	-0.00261516	-0.0242266	-0.0238129	0.0277789	0.0140067	0.0072407	-0.0173559	0.0478464	-0.00688363	0.00173025	0.0224892	0.0140418	-0.0135777	-0.0127449	0.0134168	-0.0212073	0.0181788	-0.020264	0.0114653	0.00631845	-0.006976	0.0182594	0.0270177	0.0111747	-0.0199864	-0.0134332	0.00359868	0.0035961	0.00193788	0.00686343	0.00359869	0.0353339	0.00662798	0.0324266	0.00392808	0.00857637	-0.00757512
chr14_75046376_75049718:-	-0.0832414	0.0236738	-0.0911652	-0.0356343	-0.0850332	-0.0678962	-0.0820871	-0.0615171	-0.0547429	-0.0607001	-0.0582124	-0.0344115	-0.0898174	-0.0822383	-0.0915244	-0.00963575	-0.0507118	-0.0638408	-0.066114	-0.123567	0.0128293	-0.0728585	-0.0270078	-0.0170884	-0.0356706	-0.0540792	-0.0335969	-0.0604991	-0.0157878	-0.0755424	-0.0812588	-0.0448186	-0.0014763	-0.0256059	-0.0666009	-0.0843128	-0.0843636	-0.0501019	-0.0703752	-0.0523815	-0.0676649	-0.0930419	-0.0386143	-0.0447278	-0.00713239	-0.0804303	-0.0596889	-0.0656324	-0.0298899
chr14_88416711_88437903:+	-0.0972471	-0.0635846	-0.0974346	-0.0550605	-0.0649088	-0.149479	-0.0405205	-0.0737625	-0.0278079	-0.0751568	-0.0674344	-0.101493	-0.0549871	-0.0330667	-0.0947694	-0.0575807	0.0093976	-0.0256959	-0.0260901	-0.0606718	-0.0716412	-0.100406	-0.0781636	-0.100463	-0.058593	-0.0917606	-0.0661875	-0.0879149	-0.0843654	-0.0120326	0.0285434	-0.0468665	-0.0941957	-0.00720917	-0.0483663	-0.0433205	-0.0862205	-0.0692096	-0.0886675	-0.0288842	-0.0601203	-0.0783609	-0.081408	-0.0728638	-0.100168	-0.0400969	-0.0135007	-0.0595333	-0.138013
chr14_88726541_88754671:-	0.0114897	-0.00679103	-0.0867562	-0.0151723	-0.0326658	-0.0405543	-0.0129821	-0.0252681	-0.00688289	-0.0302456	-0.0459718	-0.0109987	-0.0181701	-0.0134004	0.00214251	-0.0169779	0.00566198	-0.0230067	-0.039435	-0.045723	-0.0324704	-0.0186326	-0.0316071	0.00341027	0.0177301	-0.0289074	0.00652283	-0.00562354	0.0191286	0.0257213	-0.037684	-0.028456	-0.0177196	-0.00801067	-0.0276084	0.00891458	0.00945877	-0.0295697	-0.0393417	-0.0359042	-0.0096652	-0.036129	-0.0479123	-0.000891461	-0.0162055	-0.0338518	-0.0189307	-0.0284279	-0.0135286
chr14_91481576_91485730:-	0.0941484	0.00432894	-0.0226784	0.0440794	-0.0328663	-0.0297743	-0.0554901	-0.0282304	-0.0116681	-0.035396	-0.0245452	0.0104428	0.0356876	0.0888284	-0.0344433	0.102652	0.0951769	0.0658268	-0.0107085	-0.0243013	0.175918	-0.0593577	0.0133635	0.0463379	0.00406547	0.025962	0.118826	0.010052	-0.0349811	-0.0368137	-0.0700159	0.0118577	0.0607791	0.00909592	-0.0119929	0.00943979	0.000488822	0.0307434	-0.0514532	-0.00910418	0.0500392	-0.0392607	0.0640719	0.000591334	-0.0360926	0.0243046	-0.0475837	-0.0394752	0.0354155
chr14_93467671_93497286:+	-0.0611462	-0.0389911	-0.0469901	-0.0301592	-0.0292334	-0.0597401	-0.0278042	-0.0470695	-0.0384873	-0.0566046	-0.0670767	-0.0234835	-0.0344364	-0.0667187	-0.0569274	0.00781489	-0.0592372	-0.0478554	-0.0339176	-0.0384613	-0.00662114	-0.0301213	-0.00617899	-0.00738425	-0.0452855	-0.0672401	-0.0144696	-0.039834	-0.013148	0.00495711	-0.047161	-0.0383892	-0.0543801	-0.0552783	-0.049889	-0.0396526	-0.0201612	-0.00498054	-0.0435793	-0.00613751	-0.0611425	-0.0249567	-0.0515604	-0.0545952	-0.0378827	-0.00999696	-0.0400424	-0.0542548	-0.0311496
chr14_96555847_96556413:+	-0.0448914	0.0128313	0.012243	0.0560758	0.0181362	0.000851712	0.0471919	0.00753804	0.0185808	0.0441132	0.0281686	0.00125821	0.0530418	0.0306786	-0.00868266	0.137942	-0.0101814	-0.000277374	-0.0187595	-0.00893367	0.0672104	-3.37e-06	0.0672502	0.0177669	0.0335984	0.0451577	0.0940898	-0.00223579	-0.00685139	-0.00885047	-0.0297152	0.0913042	0.0952663	-0.0494002	0.0238305	0.0236375	0.00559372	-0.0181866	0.0780814	0.0240469	0.0128414	-0.00389251	0.0211152	0.0191093	0.0272961	0.0210701	0.000798346	0.00654465	-0.00677687
chr14_96833467_96860735:+	-0.0225617	-0.0441819	0.00793771	-0.012254	-0.00533415	-0.0157052	-0.00554191	-0.0305221	-0.0234774	-0.00153473	-0.0207166	-0.0236469	-0.027398	0.0302046	-0.0191594	-0.0263904	0.0108613	-0.00336397	-0.0295356	-0.0454185	-0.0595907	0.0327581	0.0368621	-0.000430228	-0.0130064	-0.0126579	-0.0471338	0.0060355	0.0263275	-0.0386785	-0.0361189	-0.0394326	-0.0126216	-0.0490569	-0.0190758	-0.0550073	-0.0164966	-0.0142573	-0.0219867	0.0198537	-0.00432724	0.00167576	-0.0202138	-0.0134844	-0.00418671	-0.0535271	-0.0227863	-0.0178363	-0.0284007
chr14_99458279_99465813:-	-0.111997	-0.130751	-0.506838	-0.301542	-0.360792	-0.340101	-0.553096	-0.39392	-0.584287	-0.201334	-0.472117	-0.417136	-0.270145	-0.058426	-0.141497	-0.356681	-0.517899	-0.613985	-0.486403	-0.364942	-0.122092	-0.407778	-0.0679084	-0.262321	-0.238466	-0.404504	-0.371169	-0.616592	-0.403954	-0.0288022	-0.475383	-0.223997	-0.182011	-0.185827	-0.326768	-0.588255	-0.405418	-0.498688	-0.509314	-0.401612	-0.334525	-0.45403	-0.373163	-0.583339	-0.426443	-0.517956	-0.430001	-0.332723	-0.337437
chr15_101235082_101235577:-	0.0207991	0.0811106	0.024485	0.05065	0.0148578	0.0111258	0.0106804	0.00705065	0.00657895	-0.003733	0.00124705	0.00665092	0.03657	0.0384814	0.00556691	0.0234007	0.0571821	-0.00280297	0.0162497	0.00700527	0.0534943	0.0121923	0.00286469	0.0154147	0.0411721	0.0078356	0.0427054	0.0203617	0.0111388	0.0405456	0.0368118	0.029845	0.00712305	0.010963	0.00273604	0.01294	0.022359	0.0109858	0.0322381	0.0488178	0.00316988	0.00808801	0.0167812	0.0536134	0.00701427	0.0137035	0.0135221	0.0490103	0.0376233
chr15_25266431_25278884:+	-0.0136184	-0.0226314	-0.0229717	-0.0253142	-0.0287494	0.00277592	-0.00877319	-0.0232558	-0.0296685	-0.0370062	-0.0477736	-0.00952658	-0.0293116	-0.00961805	-0.0372217	-0.0238636	-0.04413	-0.0567729	-0.028875	-0.00435751	-0.0452425	-0.0147018	-0.0156103	0.0203737	-0.0329926	-0.0422738	0.000660111	-0.0353623	-0.0178353	0.00388397	-0.0477534	-0.0215418	-0.0300185	-0.0356499	-0.0347595	-0.0135975	-0.045618	-0.0410365	-0.0238401	-0.0440347	-0.0530245	-0.00717233	-0.0110221	-0.0461933	-0.0428773	-0.0155	-0.0330008	-0.0195601	-0.0376487
chr15_27326809_27328888:+	-0.0481764	-0.0551558	-0.047157	-0.0581907	-0.0512674	-0.051916	-0.0250174	-0.0733487	-0.0444474	-0.0562092	-0.0513807	-0.0586856	-0.0624905	-0.0277284	-0.0316139	-0.0537641	0.0639703	-0.0694799	-0.0698811	-0.0304173	-0.0163914	-0.0383103	-0.0541039	-0.0166397	-0.0643473	-0.0312541	-0.0465263	0.0119263	-0.0502574	-0.0767553	-0.0388938	-0.0518108	-0.035938	-0.0720448	-0.046431	-0.0226648	-0.0389807	-0.0508529	-0.0600106	-0.0580178	-0.0207129	-0.0558816	-0.0438075	-0.0251218	-0.0104055	-0.0580497	-0.0275929	-0.0467653	-0.0687694
chr15_29761139_29773357:-	-0.0895754	-0.0372177	-0.0855844	-0.0787937	-0.0467305	-0.0863085	0.0221111	-0.0403185	-0.0277008	0.0242994	-0.028691	-0.0514714	-0.073825	-0.0379141	-0.0483721	-0.0969171	0.0265353	0.000117237	-0.0425932	-0.0518836	-0.029704	-0.0780889	0.00675858	-0.0787806	-0.0530652	-0.0872183	-0.0531	0.10843	0.0268636	-0.0768046	-0.011342	-0.0520881	-0.123822	0.104999	-0.0584133	-0.0929688	-0.000124005	-0.0130405	-0.0178185	0.00107907	0.0318624	-0.0101894	-0.0454961	-0.0226863	-0.0577486	-0.0385907	-0.0516258	-0.0789213	-0.102791
chr15_32857015_32902040:-	0.00856064	0.0589166	-0.047027	0.029173	0.0973636	0.0565465	0.0187518	-0.00880134	-0.0391962	0.174676	-0.0042228	0.0555945	-0.0450155	0.0906773	0.0451045	0.293952	0.122594	-0.0109386	-0.0121969	-0.0294546	0.191903	0.0132663	0.105266	0.0472688	-0.0435111	0.0266075	0.0841229	-0.0541425	-0.0182561	0.101253	-0.0447796	0.117084	0.091929	-0.0316432	0.0369094	-0.0164427	0.0817441	0.0301092	0.0372386	-0.0264174	0.0158416	0.0370714	-0.0417988	-0.00972851	0.0430374	-0.0284089	-0.0219808	0.0386794	0.0543198
chr15_32888172_32902040:-	-0.0067532	0.0632531	-0.0171548	-0.0135065	0.00401058	-0.0148409	-0.0134426	-0.0117122	0.00924406	0.00457307	-0.0096426	-0.0114902	-0.0141797	0.0840871	-0.0140274	0.00763074	0.0395387	0.0337301	-0.00805576	-0.0193027	-0.0201557	0.0526594	0.0368228	0.00780152	-0.00641016	0.000503375	0.0436926	0.00580254	0.0360891	0.0096677	0.0636603	0.0987904	-0.00562043	-0.0136972	-0.0136611	-0.00799634	0.0426657	-0.00448079	-0.00945593	-0.0122575	-0.00788286	-0.0107565	0.0414481	-0.00296526	-0.00626208	-0.0168126	-0.0063807	0.0152263	-0.000847857
chr15_33153048_33155045:-	-0.0532493	-0.0391018	-0.0854407	-0.0115639	0.010165	-0.0142769	-0.0489239	0.046753	0.018486	-0.0258038	-0.0484437	0.0238775	0.0119628	-0.0248155	0.0573856	-0.0395978	0.233478	0.0858677	-0.0200632	-0.0976312	-0.0231763	-0.000807035	0.155314	-0.0479988	0.124902	0.0257975	0.0436512	0.00930318	0.0178098	-0.0165313	-0.0433757	0.0818989	0.230648	-0.0278564	-0.00597722	-0.000752021	0.0174178	0.0167194	0.00197396	-0.00753046	0.118948	0.0279521	0.0736859	0.0878731	0.0502123	0.0327637	0.0526373	0.121901	-0.0321207
chr15_34915038_34927138:-	-0.0104761	0.00602096	-0.00214436	-0.00387862	0.0114277	-0.0101274	-0.00399269	0.0116113	0.00402273	-0.0220477	0.00144609	-0.00790987	0.0708464	0.0678804	-0.0170487	0.0755703	0.0267059	0.0276015	0.0191673	0.00144069	0.0226072	0.0080695	0.0599341	0.0193252	0.0170262	-0.0227889	0.0114376	-0.00714354	0.0117406	-0.0154812	-0.0170314	0.0226755	0.0136936	-0.0123409	-0.00769353	-0.00208198	-0.0095106	-0.00391116	-0.0054016	-0.00599706	0.0441098	0.00540296	0.035194	0.0043207	0.015066	-0.0247141	0.00541223	0.0232694	-0.00760655
chr15_38502312_38505920:-	-0.0299085	-0.0254799	-0.00793008	0.00989708	-0.00688942	-0.0131623	-0.0132033	-0.0293008	-0.00203503	0.100102	-0.0130674	-0.0119107	-0.0265203	-0.0407525	-0.0124755	-0.0293228	-0.0412314	-0.0217162	-0.0407313	-0.00375736	-0.00175443	-0.024184	-0.010987	-0.0352359	-0.0168612	0.00754772	0.000532859	0.0111721	-0.00543481	-0.0371237	-0.00915091	-0.00224559	-0.0323232	-0.0284778	-0.0162383	-0.0068006	-0.023938	-0.0288646	-0.0256043	-0.0367348	-0.0364249	-0.0323271	-0.0190823	-0.0418458	-0.00716162	-0.0252382	0.0072059	-0.0278943	-0.0161309
chr15_40744047_40745259:-	-0.0195305	-0.0125906	-0.0370819	-0.044507	-0.0435054	-0.0151664	-0.0388753	-0.0307854	-0.0384311	-0.0270807	-0.035318	-0.01464	-0.0147443	-0.0469887	-0.0430147	-0.0393656	-0.0422948	-0.0404759	-0.0532321	-0.0379961	0.00347064	0.00657318	-0.0151032	-0.0241093	-0.025317	0.000723335	-0.0236242	-0.0224944	-0.0295913	-0.0415664	-0.0504828	-0.014466	-0.0364564	-0.00836887	-0.0440202	-0.0284157	-0.0113064	0.034272	-0.0189811	-0.0200088	-0.0486745	-0.0286415	-0.00894962	-0.0395629	-0.0351521	-0.0318273	-0.0355512	-0.0147255	-0.0428724
chr15_41668828_41669958:+	-0.085222	-0.0454884	-0.120122	-0.0795975	-0.0874299	-0.0611942	-0.0552451	-0.0511623	-0.0855283	-0.0597375	-0.08798	-0.0563897	-0.0554849	-0.0850919	-0.0583006	-0.0411109	0.00605282	-0.0822454	-0.0931338	-0.0812537	-0.0383877	-0.0336833	-0.0446976	-0.0405058	-0.067727	-0.0368153	-0.0735254	0.0104781	-0.0531718	-0.0306395	-0.0917608	-0.0500684	-0.0445636	-0.0619656	-0.0779306	-0.0357228	-0.0771182	-0.0479866	-0.0971392	-0.0657797	-0.0900457	-0.0957661	-0.0503809	-0.0471281	-0.0320449	-0.0755992	-0.0626578	-0.0393772	-0.0587456
chr15_41696075_41699159:+	-0.0826373	0.0278764	-0.124624	-0.0655522	-0.0990526	-0.110054	-0.0485457	-0.070184	-0.0679445	-0.0822989	-0.0384603	0.0600423	-0.0468202	-0.0356435	-0.0441075	-0.0500855	0.0914482	0.00646808	-0.0453572	-0.0497505	0.00478384	0.0475743	-0.00926524	-0.065603	-0.0454437	-0.0851402	-0.0277423	-0.0492096	0.0431858	-0.0566093	-0.126695	-0.0431882	0.0465823	-0.0286579	-0.101433	0.0186664	-0.023123	-0.0107997	-0.0396041	-0.0342521	0.0443327	-0.0371779	-0.075198	0.0828211	-0.011087	0.0465131	0.0317797	0.00171085	-0.0155109
chr15_42260958_42268032:-	-0.0203641	0.00139103	-0.0337257	-0.0204885	-0.0122224	-0.0158317	-0.0220847	-0.018836	-0.00505533	-0.0127887	0.0391728	-0.00592706	-0.00723126	-0.0263611	-0.00155591	-0.0350161	0.0231392	-0.013447	-0.0171761	0.00511818	-0.040192	0.0418755	-0.0232616	-0.0202928	-0.0320251	-0.0231309	0.00417321	0.0444426	-0.00828528	-0.0342137	-0.0157735	-0.0187989	0.0146963	-0.0435752	-0.0271264	-0.0345305	-0.0332259	-0.023609	0.0657584	0.0499026	-0.0109139	-0.0260152	-0.0349868	-0.0273492	-0.00480398	-0.0111753	-0.0138885	-0.00132044	-0.0241988
chr15_42827928_42840433:-	0.0286267	0.0236801	-0.0511449	-0.0561893	-0.00820609	-0.0144821	0.0354614	-0.0477961	0.0595584	-0.075611	0.0224497	0.0648541	-0.00258179	0.0477581	-0.0376181	0.00890503	0.168991	0.117513	0.0203972	-0.0462295	0.0518471	-0.0185015	0.0770103	-0.0219489	-0.0531042	-0.0133897	0.0191876	0.0755842	-0.00439382	0.0441521	0.0265213	-0.0205391	0.00065815	-0.0452288	-0.00911441	0.0204258	0.0549127	0.10005	0.0545895	0.145323	0.0504759	0.0171544	-0.0460377	0.0411531	0.0573752	0.0121893	0.0252666	0.0422671	-0.0574756
chr15_44331988_44380976:+	-0.0328199	-0.0723196	-0.0508818	-0.0744813	-0.0697842	-0.0482402	2.37e-05	-0.0744162	-0.0371755	-0.074349	-0.0273083	-0.0284219	-0.0538712	-0.0665609	-0.0538928	-0.0585476	-0.0862194	0.00591545	-0.0251237	-0.0711843	-0.0507809	-0.00904994	0.0170995	-0.0673677	-0.0646369	-0.0401048	-0.00379225	-0.0598295	-0.0557791	-0.0315595	-0.0787983	-0.0768188	0.0609599	-0.0711129	-0.0719592	0.0505616	-0.0691418	-0.0177347	-0.0720824	0.0148389	-0.0181451	-0.0190039	-0.0275102	-0.0464077	-0.00308963	-0.033051	-0.0949885	-0.0561816	-0.0425256
chr15_49235851_49292537:+	-0.0184441	-0.0162663	-0.0269822	-0.0126364	-0.00472372	0.0191813	-0.0153341	-0.00965923	-0.00952878	0.0464771	-0.00777201	-0.0432817	-0.0258406	0.00783624	-0.0412024	-0.0196677	0.0385083	0.0144508	-0.0261169	0.0171288	0.0746291	0.011778	-0.0459928	-0.0130995	0.00424701	0.0165982	-0.00802841	0.0274456	-0.0301144	0.0772591	-0.0306357	-0.00191462	-0.0340997	-0.0308489	0.00382718	-0.031007	-0.0266123	-0.0215646	-0.0272806	0.0342304	-0.0199253	-0.0266224	0.0261641	0.00689886	-0.0137029	-0.0102199	0.0142931	0.000921731	-0.0184089
chr15_50631417_50663046:-	0.0124538	-0.00389248	-0.00944582	0.0266425	-0.0179091	0.00566252	0.0360775	-0.00884779	-0.00736983	-0.0357269	-0.0242914	0.0316896	-0.0315969	0.0587958	-0.0146194	0.023001	0.0769726	0.039607	0.00567229	-0.0202843	-0.0363071	0.0308179	0.0934264	0.0556013	-0.012712	0.00983183	0.0248194	-0.0262926	0.0781378	-0.0153418	-0.0236638	-0.0112162	0.0221374	0.00413612	-0.0269829	-0.0189027	-0.0345458	0.0417435	-0.0245666	0.00790613	0.0088933	-0.0341143	0.0242273	0.0136582	0.060196	-0.0313924	-0.011649	-0.0273928	-0.0322538
chr15_51535663_51547408:-	-0.0244833	-0.0404151	-0.0317905	-0.0530414	-0.0385262	-0.0386183	-0.0565404	-0.0517072	-0.0459215	-0.0197673	-0.021007	-0.026497	-0.0461214	-0.0586075	-0.0422953	-0.0503418	-0.00404896	-0.00439595	-0.0322914	-0.0479284	-0.0649233	0.0147648	-0.00835169	-0.0420125	-0.0308444	-0.0457778	0.00439094	-0.0258393	-0.0220364	-0.0464866	-0.056504	-0.0423445	-0.0496762	-0.0603268	-0.0482127	-0.00234714	-0.0466184	-0.0461215	-0.00479412	-0.00206631	-0.0374201	-0.0548143	-0.057797	-0.0436288	-0.0542348	-0.0326413	-0.0284231	-0.0400245	-0.053692
chr15_51766373_51777018:+	-0.0140742	-0.0196701	-0.0189487	0.0073637	-0.0181377	0.000362787	-0.0146611	0.00752378	0.0192709	0.0142044	0.00621918	-0.00836402	0.00510495	0.0145554	-0.0221929	-0.00110426	0.0500498	0.0611735	-0.0223667	0.0029031	-0.00682029	0.0159503	-0.0256605	0.00228771	-0.0215686	-0.00623144	0.0191863	-0.00239226	0.00456879	-0.0217587	7.79e-05	0.0133785	0.00976844	-0.0194707	-0.0216491	-0.00550215	-0.0230584	0.000524448	0.00157539	0.0183423	-0.0235276	-0.0231441	-0.0163194	-0.023732	0.0270608	-0.0085249	-0.0181525	-0.00388064	0.0268032
chr15_51781044_51782828:+	0.0506658	0.0820757	-0.0183818	0.0391292	-0.000852139	0.000577749	0.00207219	0.023736	-0.0188678	0.0796399	0.0162745	0.0821444	0.0300986	0.0394878	0.0164385	-0.00377092	0.0865538	0.0178444	0.0502594	0.036178	0.0606972	0.042833	0.0931431	-0.0047953	0.0222592	0.0477917	0.0540962	0.01139	0.0573602	0.00291712	-0.0211586	0.0326986	0.0684679	0.0582938	0.00224303	0.0227118	0.0451161	0.0161175	-0.00902183	-0.0120331	-0.0301685	0.00969677	0.00841526	0.0561135	0.0026574	0.100804	0.000559745	0.0291468	0.0845669
chr15_51869217_51902036:+	-0.0032201	0.0379217	0.000379043	-0.00445317	0.0144101	0.023036	-0.00257737	0.00731055	0.00429611	0.013503	-0.00590598	0.0304452	0.000930704	0.0362118	0.043362	-0.00248329	0.013333	0.00916876	-0.00698404	-0.003616	0.010165	0.0150782	0.00358495	0.0133164	0.00974366	0.00762746	0.00770791	-0.00396619	-0.000601633	0.0171125	0.0156201	0.0266323	0.00105805	-0.00288457	-0.00188125	-0.00104361	0.00571224	0.00217551	-0.0061043	0.0120739	0.027956	0.00593293	0.0136323	0.0136858	-0.00494292	-0.00181493	0.0192575	0.00837803	0.0166753
chr15_54293895_54338489:+	-0.0281386	0.0337085	-0.0188456	-0.0384349	-0.0185726	-0.044416	-0.00851109	-0.0260493	-0.0396411	0.00183142	-0.0356444	-0.0134073	-0.0205355	0.0024102	-0.0406552	0.0370503	-0.020631	-0.0184838	0.000714503	-0.0102498	-0.0103554	-0.0104493	-0.0174904	0.00486982	-0.033946	-0.0205043	-0.0122304	-0.0351206	-0.00763864	-0.0293798	-0.0345905	-0.00650924	0.00794032	-0.00161532	0.00128038	-0.0340831	-0.0245665	-0.00862486	-0.0250831	-0.0398952	0.0160886	-0.034631	-0.018988	-0.0302201	-0.0311687	-0.0291122	-0.0205063	-0.0222696	-0.0362275
chr15_59030804_59031702:+	-0.0284414	-0.0142146	-0.0174173	0.0156106	0.000359387	0.00541913	-0.0295318	-0.0257428	-0.0188628	-0.0314062	-0.0146395	-0.00799984	-0.0053626	-0.00626736	-0.0315478	-0.0254062	-0.0273472	-0.0160487	-0.0278852	-0.0305841	-0.0137945	-0.0245755	0.0478768	0.00150125	-0.0132153	-0.00845194	0.020199	0.00719554	-0.0247359	0.000605995	-0.0329974	0.00528814	0.00975895	0.0275307	0.00907459	-0.0228543	-0.0153045	-0.0217566	-0.0143779	-0.0293541	-0.0309982	-0.027615	-0.0101449	0.00987315	-0.0247856	-0.0267319	-0.0174844	0.00592659	-0.0311723
chr15_59195461_59218087:-	-0.0365933	-0.0318489	-0.0198288	-0.0156524	-0.0652264	-0.016522	-0.0508219	0.0103449	-0.0259022	-0.0253918	-0.0182639	0.00707578	0.0221007	-0.0225021	-0.00963009	-0.0392956	0.0138579	0.011204	0.0282848	0.0411802	-0.0149202	0.0551061	-0.0383668	-0.0232022	-0.0153755	-0.0148139	-0.0132759	-0.0288911	-0.0279864	0.0177304	-0.0576056	-0.0094147	-0.016921	-0.0279872	-0.0268571	0.0334091	-0.0034306	0.0072898	-0.0259745	-0.014375	-0.0242015	-0.0207935	-0.0155145	0.0174235	-0.0266565	-0.00373681	-0.007951	0.0113327	-0.0216062
chr15_62007308_62013992:-	-0.326382	-0.508547	-0.712196	-0.491938	-0.666386	-0.802112	-0.64796	-0.502894	-0.207397	-0.558207	-0.688482	-0.401876	-0.654793	-0.41328	-0.518235	-0.419494	-0.0424653	-0.408195	-0.468109	-0.714738	-0.518179	-0.12913	-0.462223	-0.534841	-0.414338	-0.613092	-0.236163	0.0547897	-0.313652	-0.529362	-0.940004	-0.365774	-0.448087	-0.34124	-0.541491	-0.645912	-0.568068	-0.413615	-0.462991	-0.284251	-0.254187	-0.668344	-0.695353	-0.438463	-0.464872	-0.201357	-0.35403	-0.433264	-0.587252
chr15_62020479_62044255:-	-0.0195262	-0.0124214	-0.0258404	0.00149299	-0.00533009	-0.0261091	0.012488	-0.00642845	0.0107519	-0.0151547	-0.0178904	-0.0180576	0.00019046	0.00414053	0.0269368	0.00966738	0.0729919	0.0753431	-0.0029929	-0.00661026	-0.0246034	0.0281798	0.00927714	0.0148404	-0.0224931	0.00609252	-0.00823858	0.00498051	-0.00279608	0.00913185	-0.0273205	0.00152208	0.0979503	-0.0240305	-0.0169591	0.0511575	0.00237317	-0.0186084	0.0180657	-0.00541216	0.000958466	-0.0100425	0.0238279	-0.014869	-0.00284712	0.0272441	-0.0133081	-0.0272232	0.04562
chr15_63696124_63716473:-	-0.0139356	0.0146681	-0.0954628	0.121095	0.0499909	0.0264423	0.0770841	-0.0672179	0.102858	-0.0207865	0.162024	0.204715	0.0347575	0.013042	0.0061457	0.0886982	0.398766	0.302865	0.0955649	-0.0842181	-0.0350221	0.218597	0.205164	0.214634	-0.0410973	0.15604	0.173105	0.290034	0.174729	-0.00979355	0.0228605	0.0938269	0.052269	0.0787347	0.0219971	0.193537	0.304355	0.286185	0.245097	0.114132	0.0807681	0.112902	0.0975616	0.212179	0.242494	0.0158054	-0.0469263	0.0332604	0.0749246
chr15_63706780_63716473:-	0.0142787	0.0662061	0.0437781	0.0251345	0.0285315	0.0137485	0.0360934	-0.00309718	0.0153909	0.0172278	0.00267234	-0.00866461	0.0230682	0.111662	0.0057991	0.000523147	0.0906781	-0.0074773	0.0114145	0.0241785	0.0182698	0.019483	0.00736662	-0.00375856	0.0234182	0.0116134	-0.00888157	0.00898732	0.00667682	0.0315033	0.0349905	0.0192421	-0.00963991	0.0526387	-0.0053362	0.0415416	0.0227928	0.0702614	0.0141951	0.0256227	0.00112485	0.00339706	0.0348095	0.0454378	0.0486059	0.0160537	0.0407829	0.0436788	0.027973
chr15_64499293_64500166:+	-0.0628652	0.0714366	-0.0778303	0.0788901	-0.0824697	0.0250586	-0.0564738	-0.0614686	-0.0972895	-0.0589516	-0.0890425	-0.0575095	0.0171016	0.0989029	-0.162881	0.205661	-0.0513803	-0.050439	-0.0520026	-0.0925555	0.082656	0.0199112	0.0216205	0.0957601	-0.033811	0.0106568	0.035806	-0.0160992	0.0820717	0.0206359	-0.0523306	-0.00133866	0.135823	0.0107201	-0.0880511	-0.0799774	0.00423428	-0.00656021	-0.112569	0.0265498	-0.0259136	-0.0850242	-0.0822537	-0.00711625	0.0154989	-0.0800589	-0.0185803	-0.00326373	-0.0784992
chr15_65178934_65180204:-	-0.0058003	0.0166315	-0.0350351	-0.00164739	-0.020843	-0.0341497	-0.030128	-0.0287961	-0.0157719	-0.0312654	0.0161812	-0.0198234	-0.0068928	-0.0324058	-0.0384011	-0.02615	0.026954	-0.0167477	-0.017002	0.00517333	0.0134248	-0.0114132	-0.0118394	-0.0352871	-0.0144702	-0.0170764	-0.0231939	0.0125122	-0.000794367	-0.0247482	-0.0103677	-0.00191959	-0.0195952	-0.0305309	-0.0281406	0.00794016	-0.0334004	-0.0335702	-0.0187713	-0.0158131	-0.0289752	-0.0206614	-0.0196705	-0.0169672	-0.00825656	-0.0173514	0.016368	-0.020835	0.0620684
chr15_65715478_65756472:-	-0.129195	-0.0714033	-0.152091	-0.071544	-0.112792	-0.140276	-0.16938	-0.128907	-0.130816	-0.109036	-0.163072	-0.0716072	-0.131246	-0.0286509	-0.0123486	-0.12129	0.0232189	-0.049986	-0.160894	-0.0362307	-0.0456382	-0.0797182	-0.100687	-0.129438	-0.128787	-0.0912471	-0.0513405	-0.0964449	-0.00607154	0.0127314	-0.0882903	-0.142599	-5.44e-05	0.0454096	-0.047622	-0.0950078	-0.0847761	-0.0664941	-0.0979969	0.0767819	-0.140139	-0.146823	-0.00604638	-0.118995	-0.072586	-0.174703	-0.0705099	-0.0894887	-0.10997
chr15_67231814_67236820:-	-0.0196693	-0.0570563	-0.0359039	-0.0567327	-0.0458083	-0.0359835	-0.0144362	-0.0650083	-0.0126712	0.0259644	-0.0303924	-0.0821334	-0.0439259	-0.096598	-0.0708682	-0.0935836	0.0674883	-0.0693611	-0.0341118	-0.0326808	0.0616891	-0.00406206	-0.0439676	-0.0304388	-0.0265029	-0.0494457	-0.0699863	-0.0475755	-0.0327829	-0.0120759	-0.0472283	-0.0650814	-0.0946795	-0.0762043	-0.0445803	0.10851	0.00102223	-0.0877612	-0.0640324	-0.071928	0.0494152	-0.0730843	-0.0568377	-0.0535872	0.00335433	-0.0389516	-0.0172782	-0.069169	-0.0590333
chr15_70919050_70984257:+	0.0336106	0.00225851	0.000562234	0.00327193	0.00178916	0.0196671	0.00327935	0.0136023	0.00376346	0.00360146	0.0739901	0.0125635	0.00668975	0.021322	0.00951669	0.0526335	0.0218279	0.0174712	0.0158985	0.00671397	0.056536	0.0245606	0.0308699	0.0117276	0.0270485	0.00744526	0.0570886	0.0283171	0.0120307	0.00154092	0.0073493	0.0378799	0.00719116	0.0100786	0.00240371	0.00708587	0.00717077	0.0519132	0.0174101	0.00662973	0.0256708	0.00545969	0.00747694	0.017571	0.0233788	0.0202423	0.0228441	0.0400926	0.0154466
chr15_72007826_72027793:-	0.000442866	0.00031786	-0.0237354	0.0103638	0.00265279	0.00129914	-0.0149409	-0.024384	-0.022455	-0.0172955	-0.0357936	-0.0105051	-0.0202601	0.0236931	-0.0295788	-0.00699196	-0.031044	0.00708599	-0.0204834	-0.00938348	-0.0161897	-0.020149	0.0447433	0.0308484	-0.0035625	-0.0226001	-0.00127545	-0.0253678	-0.0194304	-0.00733849	-0.0303796	0.00596529	-0.0199296	0.031638	-0.00990354	-0.0258086	-0.0326678	-0.00580663	-0.0354976	-0.0330998	-0.0360324	-0.0328871	-0.00304448	-0.0336143	-0.011847	-0.0251228	-0.0213888	-0.0140826	-0.0281877
chr15_72045724_72046634:-	-0.0418813	-0.0101334	-0.0389308	0.0255847	-0.039249	-0.0173019	0.00140551	-0.0243788	-0.01306	-0.0407233	-0.0399881	-0.0270889	-0.00940273	0.0349347	-0.0404731	0.0878349	-0.0421558	-0.0217948	-0.026594	-0.0390926	-0.0143206	0.0107691	-0.0178572	-0.0300781	0.0131066	-0.0153774	-0.00662067	-0.0123758	-0.0211751	0.0252617	-0.0367643	-0.0142874	0.0171109	0.0326626	-0.0214241	0.0345703	-0.0423892	-0.016299	-0.0395022	0.0187966	-0.0348376	-0.039535	0.0284231	-0.0194987	0.012184	-0.0280481	-0.0229547	-0.0310519	-0.0442774
chr15_74926766_74929232:-	-0.0147657	0.0187438	-0.0273532	-0.0185013	-0.00904658	-0.0157126	0.0483795	0.00800169	0.0416991	0.00491226	-0.00678813	0.0469013	0.0274818	-0.0148293	0.000999279	-0.0145258	0.0601167	0.0504507	0.0135344	-0.0225835	-0.0116932	0.0376486	0.014164	0.00133162	0.0429094	-0.00386119	0.0484346	0.0693166	0.0351246	0.00290817	-0.0269644	0.0197601	0.016965	0.0152166	0.00721642	0.00149493	-0.00353201	0.0044261	-0.0198821	-0.0218434	-0.0285234	-0.0129814	-0.0193188	0.0257813	0.0489217	-0.0272779	0.0190455	-0.00203085	-0.00860261
chr15_76274412_76295737:-	-0.0541979	-0.0379304	-0.0323012	-0.0286003	-0.0338931	0.0164441	-0.0655026	-0.0382197	-0.0410245	0.0058469	-0.0390036	-0.0396168	-0.0459068	0.0376424	-0.0287646	-0.0493377	-0.0437935	-0.0516568	-0.0544455	-0.0553963	0.0480729	-0.0577409	-0.0433642	-0.00753381	-0.0268352	-0.0510301	-0.0485009	-0.0590848	-0.0233199	-0.0476717	-0.0528707	-0.0145972	-0.023038	-0.0562297	-0.0476934	-0.0210804	-0.0336674	-0.0348897	-0.0397712	-0.0473424	-0.012316	-0.035847	-0.0159795	-0.035543	-0.0457033	-0.0424802	-0.0490159	-0.0331424	-0.0311992
chr15_77252367_77286504:-	-0.00398972	0.00177194	-0.0124373	0.011805	0.0157265	0.00685522	0.0225027	-0.0173399	-0.0181716	0.0201679	-0.00201478	-0.0110079	0.00666636	0.00349734	0.00406491	-0.0218361	0.0159221	-0.0161283	-0.0161247	-0.00997135	-0.0104198	0.0570861	0.0276275	-0.00702354	0.00981064	-0.0151862	-0.00821985	0.0150766	0.0453086	-0.0149829	-0.0113695	-0.00552288	-0.0231848	0.0215172	-0.00238212	-0.0014045	-0.00841259	0.0553676	-0.0139752	0.0202701	0.00253178	-0.0170549	-0.00162383	0.0129441	0.0260477	0.00817456	0.00416233	0.0220913	-0.0201903
chr15_77467095_77471814:+	-0.00895068	-0.0105264	-0.00853126	-0.0175465	0.00448919	0.0203918	-0.00611011	-0.00811807	-0.0156765	0.0420366	-0.0127344	0.00888578	-0.0075958	0.0242478	0.00677543	-0.021254	-0.000253047	-0.0141351	-0.00980045	-0.024896	0.0111535	0.0165194	0.0168023	0.0195652	0.00315929	-0.0037721	0.0291634	-0.000744954	-0.015029	-0.010574	0.00844363	0.00719219	-0.0043777	0.0392066	-0.0134444	0.00941324	0.00810506	-0.00545221	-0.0129168	0.00267579	0.024582	-0.000920545	-0.000462674	-0.00763052	-0.0119515	-0.0102238	-0.011181	0.0261622	-0.00472556
chr15_82688736_82689453:-	0.0067014	0.0761402	0.0339219	0.0267831	0.0160113	0.0103297	0.0308339	0.0174231	0.0432347	0.0376021	0.000345093	0.033351	0.0182812	0.0535804	0.0249147	0.0182026	0.0512782	0.0546633	0.0101774	-0.00288238	0.0669534	0.0514388	0.00733552	0.0306793	0.0279547	0.0151331	0.0501662	-0.00698551	0.0511889	0.0572643	-0.00476624	0.0186954	0.059226	0.00159289	0.0320974	0.0251823	0.0202519	0.0281487	0.0455158	0.0488616	0.00540772	0.0343959	0.0501963	0.0087773	0.0218463	0.0133991	0.0161636	0.0803384	0.00847432
chr15_83151215_83158041:-	0.00883706	0.00924593	0.0264523	-0.0262554	0.0116697	-0.00204552	-0.0461172	-0.00260232	-0.0423806	-0.0417344	0.0213305	0.029388	-0.0284116	0.0426512	-0.0112662	-0.054327	0.0225723	0.0490312	-0.0294375	-0.0141189	0.00273922	-0.0387924	-0.00593553	0.0430104	-0.0213945	-0.0333462	0.0323341	0.0508776	0.0223563	0.000826792	-0.0408262	-0.0337287	-0.0540848	-0.0427468	-0.0474897	-0.00565095	-0.0488732	-0.00325723	-0.0386664	0.0176448	0.012509	-0.0368004	-0.0085843	-0.0211583	-0.0163905	0.0507612	0.00144516	-0.0333987	-0.0477576
chr15_83559253_83576741:+	-0.0536603	-0.0566025	0.00173514	-0.0435336	-0.0190199	-0.0642205	-0.0219173	-0.0373276	-0.0151393	-0.0211333	0.00306607	-0.0368902	-0.0249287	-0.0597997	-0.0567832	-0.0316619	0.0287456	0.047719	-0.0192776	-0.0314113	-0.0678473	-0.00962827	-0.00987719	-0.0275211	-0.0285916	-0.058166	-0.0290501	-0.00392056	-0.0253163	0.0369063	-0.0467921	-0.0529561	-0.0401724	-0.0120968	-0.0513389	-0.0533155	-0.0279918	-0.0233529	-0.0383782	0.0273848	-0.0112524	-0.0265739	-0.0284546	-0.0290821	-0.00751798	-0.0442975	-0.0198201	-0.00968257	-0.0519341
chr15_83559253_83588771:+	-0.0473176	0.00933518	-0.0167536	-0.0316413	0.006838	-0.0184256	-0.00228546	-0.0106505	-0.00726963	-0.0041428	0.0290548	0.0711861	0.0473235	0.0232209	0.0564613	-0.0118524	0.122287	0.00884728	-0.0340179	0.0148032	-0.00907221	0.000425184	0.0426743	0.067805	-0.00967516	-0.00893136	0.0201461	0.028725	0.052802	0.0772424	-0.0283271	0.0350347	0.00494793	0.184639	0.0211916	-0.00604832	0.0198186	0.0564337	0.0456449	0.0656052	0.0449435	-0.0149337	0.014461	0.0186647	-0.0579538	0.0523724	0.0176593	-0.0171732	-0.0204228
chr15_85064370_85067204:+	-0.0272447	-0.026184	-0.025744	-0.000518588	-0.0374733	0.0399908	-0.0189303	-0.0199022	-0.0223544	-0.0381671	0.0125218	-0.0324903	-0.0297214	-0.00800561	-0.0607496	0.0360556	-0.0428721	-0.0168266	-0.028391	0.0722051	0.00760289	-0.0518872	-0.0115637	-0.0294391	-0.0164004	-0.00413505	-0.0228034	-0.0383044	-0.0283973	-0.0233977	-0.0479383	0.00909922	-0.0228699	-0.0331478	-0.0397217	0.00843838	-0.0270707	-0.0195444	-0.020954	-0.0355186	-0.0330795	-0.0356071	-0.022838	-0.013695	-0.0226125	-0.0440886	-0.0439345	-0.0387086	-0.0206583
chr15_85113873_85121014:+	-0.093145	-0.0110787	-0.0660364	-0.0410836	-0.084719	-0.00685086	-0.0671079	-0.0576418	-0.0415034	-0.015214	-0.0686079	-0.0599217	-0.0487694	-0.0685244	-0.0729689	-0.0459129	-0.0449589	-0.0292348	-0.0531983	-0.0757178	-0.000389275	0.0226877	-0.0717472	-0.0287856	-0.0758773	-0.0485838	-0.0247451	0.00231949	-0.0512047	-0.0310696	-0.0203112	-0.0358167	-0.0499739	0.00947583	-0.0434948	-0.0702568	-0.059311	-0.0384013	-0.0532268	-0.0485083	-0.0263391	-0.0674278	-0.0406528	-0.0461544	-0.0309425	-0.0777351	-0.0421717	-0.0413806	-0.0571564
chr15_87929191_87940753:-	0.0297776	0.0063064	0.00318031	0.053802	0.00836297	0.0316052	0.0327297	-0.00173819	-0.0228775	0.0800535	-0.0322734	0.0371432	0.00260294	0.151205	0.0474163	0.0105427	-0.0458179	0.00427033	-0.00627656	-0.0349801	0.0559552	0.0365286	0.0436068	0.0578451	-0.0197112	-0.0222841	0.0441968	-0.0262006	0.0398951	0.0361703	-0.0412644	0.0020273	0.0182581	-0.0314189	-0.0156914	0.0441063	-0.0194575	0.0742563	-0.0293003	-0.00753623	-0.00353072	-0.0136468	0.0255195	-0.00284089	0.063399	-0.019193	-0.010792	0.00190511	-0.030354
chr15_89113725_89116521:+	-0.0325122	0.0497917	-0.0740059	-0.0611263	-0.00953168	-0.0253406	-0.0161427	-0.0401152	0.0413231	-0.0555787	-0.0234488	0.0401994	-0.0183864	0.0142112	-0.038542	-0.0561396	0.0495622	-0.0420165	0.0794488	-0.0305269	-0.0436603	0.0229502	-0.0147047	-0.00643006	-0.0353732	-0.0553593	0.0438313	0.0883287	0.0228697	-0.0095101	-0.102115	0.0547422	0.0264435	0.0426776	-0.055662	0.006528	-0.00300977	0.0655299	0.000970319	0.100337	-0.0759699	-0.06469	-0.0772185	0.0111583	-0.00640829	0.00526522	0.00792921	-0.0171738	-0.033908
chr15_89113725_89155534:+	-0.0250334	0.0106245	0.0129337	-0.00385555	0.0251245	0.0144819	0.00145728	-0.00151561	0.0871878	0.0325398	0.00304523	0.0682388	0.0330169	0.0386915	0.030783	-0.0254876	0.064216	0.0540747	0.0492305	0.00332212	0.0592336	0.0568251	0.00194356	-0.0148074	0.0301775	0.0215929	0.037641	0.0189501	0.0375506	-0.0145109	0.00362284	0.0281601	-0.0167208	-0.0329603	-0.016279	0.102296	-0.0113301	0.0335599	-0.0204016	-0.0227639	0.000303716	0.00920621	0.0183365	0.023415	0.0477527	0.01202	-0.00699737	0.0454065	0.00639013
chr15_90441506_90443478:+	-0.0030184	0.0103149	-0.0036019	-0.00728519	0.0299365	0.0163344	-0.0098119	-0.0108774	-0.0199237	0.0166831	0.0116731	0.0134778	-0.0162445	0.0140741	0.00363023	-0.0224362	-0.00472562	-0.00769181	0.0121709	0.022236	0.0788559	0.021205	0.0205643	0.0261558	-0.00740745	0.00162303	-0.00914502	0.0196872	-0.00883028	0.0254655	-0.0170394	0.0258678	0.0270739	0.0173415	0.0115938	-0.00518949	-0.0165653	0.0153717	-0.00416489	-0.014879	-0.013439	-0.0158323	0.0391491	-0.00881654	-0.00483772	0.00895672	-0.00458289	-0.00422411	0.0455918
chr15_91251819_91268605:+	-0.000968479	-0.013144	-0.00272342	-0.029945	-0.0263245	-0.0219114	-0.0304706	-0.0327374	-0.030167	-0.00784833	-0.0393491	0.0029539	-0.0336413	-0.0277186	-0.0197321	-0.0148507	-0.0257935	-0.0155248	-0.0352019	-0.0350844	0.0210034	-0.0129463	-0.0377125	0.0222157	-0.0191158	-0.0266273	-0.0160371	-0.0327658	-0.0256355	-0.0282592	-0.0392644	-0.0292806	-0.0181155	-0.0266404	-0.034836	-0.0299034	-0.0319862	-0.0328112	-0.0343666	-0.0240799	-0.0256196	0.00654107	-0.0367104	-0.0268712	-0.00127783	-0.0446666	-0.0037085	-0.0352157	-0.0367915
chr15_92924321_92929091:+	-0.00817609	0.0114955	-0.0106896	0.0289229	0.000536732	0.0189498	0.00606427	0.0130214	-0.00166318	0.0183612	0.0103638	-0.00771148	0.0129779	0.0571663	0.0382979	-0.00587631	0.0142843	0.0151121	-0.00134764	0.00909281	0.0447305	0.0236672	0.0163651	-0.00916796	0.0033856	0.0123765	0.00296416	0.00592903	0.030569	0.0562848	0.0247526	0.00481867	-0.00595003	0.0175123	0.0115319	0.00954271	-0.00773559	-0.00573131	-0.00440148	0.0749237	-0.00228607	-0.0061636	-0.00734763	-0.000185199	0.0237545	0.00165126	0.010033	0.0117988	-0.0136079
chr15_92996957_93002317:+	0.0169909	0.000956258	0.0324711	-0.0253289	-0.00582964	-0.0253992	0.00590222	-0.000743417	-0.0247192	0.0366626	-0.0259341	-0.0181078	-0.00217269	0.0184389	0.0296764	0.0520651	0.0349866	-0.0256696	-0.0234596	-0.0260854	0.0116042	-0.00633706	0.0154225	0.00275481	0.0270251	-0.010982	0.0383826	0.0320043	-0.0203901	-0.0195295	-0.010594	0.0172206	0.00224184	-0.000538396	-0.0025208	-0.0214818	-0.0207747	-0.0217173	-0.00753364	-0.020836	-0.0233791	-0.0203991	-0.0135818	0.00405318	-0.0250048	-0.0116092	-0.000676596	-0.015022	-0.0262462
chr16_17258988_17259498:-	-0.0111883	0.0110929	-0.0215108	0.00509207	0.0125237	0.0178744	-0.00588007	-0.0225498	-0.0187764	-0.0146965	0.0128311	-0.0040145	-0.00201617	0.00408033	-0.0102722	-0.0187371	-0.0109151	0.0394801	-0.00924864	-0.0170758	0.0212972	0.00565639	0.00014318	-0.0139314	0.00215633	0.00238227	0.028722	-0.0173801	-0.0128381	-0.0253106	-0.0136475	-0.0062678	-0.0224579	-0.0130565	0.00899951	-0.0156671	-0.0015741	0.00417549	-0.0212327	-0.0193874	0.00173606	7.39e-05	0.000827553	0.00550494	0.0104121	0.0308683	-0.0205493	-0.0148387	-0.00981462
chr16_1809238_1809833:-	-0.0120283	-0.12771	-0.0589681	-0.123622	-0.0903061	-0.13409	-0.074251	-0.0737306	-0.0768086	-0.114573	-0.0100118	-0.117543	-0.103458	-0.138082	-0.0925911	-0.0945575	-0.0529332	-0.0805114	-0.0986495	-0.013904	-0.200208	-0.0266613	-0.0945578	-0.109026	-0.117188	-0.115852	-0.0874287	-0.0475869	-0.0834602	-0.103277	-0.0527613	-0.139885	-0.119335	-0.116112	-0.121309	-0.0761211	-0.061688	-0.0534963	-0.0943744	-0.0453802	-0.129044	-0.115385	-0.144887	-0.122267	-0.130921	-0.0343392	-0.0733191	-0.119804	-0.0455706
chr16_19616114_19647882:+	-0.00591627	-0.00402699	0.0344585	-0.0036856	0.0217572	-0.00799982	0.00707646	0.00666635	0.0171886	0.0166977	0.0256083	0.0159929	-0.0025013	0.0171701	-0.00620813	0.020267	0.0153067	0.0269286	0.0376416	0.0149947	0.0296891	0.029293	0.0127322	0.0213279	0.0189534	0.0143715	0.0054574	0.010947	0.0402063	0.0162991	-0.00437285	0.00735588	0.0227228	0.0209593	0.0125209	0.0187203	0.0273431	0.023312	0.053452	-0.00067412	-0.000872956	0.000534665	0.0317454	0.0639814	0.0289763	0.0127569	-0.000725506	0.0275159	-0.0041923
chr16_23102319_23108183:-	-0.00721713	0.0384598	-0.00275595	-0.0303755	0.0145998	0.0121759	0.00744356	0.00098274	-0.0074731	0.0320135	-0.000397114	0.0375903	0.00156863	-0.0112248	-0.018625	-0.000638434	0.0444296	-0.017652	-0.0181441	-0.0239144	-0.0217838	0.00268569	0.0398784	0.00735177	0.0111762	0.0182743	0.00826541	0.00126554	0.0231279	0.0306544	0.0055126	0.0104786	0.00795863	-0.0100061	0.012992	0.0162459	-0.0100945	-0.00945086	0.0195769	0.0147315	-0.0252515	0.00692357	-0.015909	-0.0035908	-0.0102637	-0.0255906	0.0144055	-0.00199158	0.00499792
chr16_2319581_2319840:-	0.010667	0.0153691	0.0202077	0.00472098	0.0126962	0.0246395	0.015112	0.0260409	0.024993	0.00385495	0.0011604	0.0185743	0.0242584	0.0196734	0.00553957	0.0300692	0.0394243	0.0263428	0.0366914	0.00316215	0.0205739	0.0687284	0.0193655	0.0146628	0.038169	0.0239465	0.0362384	0.00212631	0.0194831	0.0108436	0.0215751	0.026145	0.026913	0.0193423	0.0147728	0.0182926	0.012574	0.0364508	0.020168	0.0100653	0.0263425	0.0270001	0.0238335	0.00930826	0.0496379	0.0360164	0.0105131	0.0115364	0.0134272
chr16_24032136_24035547:+	-0.0329668	-0.0486959	-0.0337515	-0.0529797	-0.0155257	-0.0180767	0.0483962	-0.0369935	-0.0121272	-0.00462323	-0.00259138	0.00434009	-0.000210546	0.00330121	0.0347758	-0.00862585	0.0571492	-0.049322	0.00416115	0.116253	0.00572898	-0.029511	0.0213616	-0.0380511	-0.00728278	-0.0291265	0.0213319	-0.0284128	-0.0385403	0.00503905	-0.0409815	0.0333694	0.0211378	0.0277455	-0.0349427	0.00771811	-0.0201822	0.0439403	-0.0300684	0.000464645	-0.0312209	-0.0170911	-0.0100494	-0.0246948	0.0523397	-0.0248358	-0.0150706	-0.018799	0.00900721
chr16_24092791_24123981:+	0.00656057	0.00995651	0.00292097	0.0107129	0.000720575	0.0043536	0.010854	0.00338915	-0.00182219	-0.00496667	0.00146761	0.0216234	-0.000446522	0.0125142	0.0143301	-0.00839464	0.0124907	0.000198662	0.0137145	-0.00297478	0.0259454	-0.00418531	0.0109794	-0.00319667	0.013978	-0.0125617	0.00668914	-0.00242854	-0.0147889	0.0134284	0.00226565	0.0443523	-0.00729321	-0.00263818	-0.0079776	-0.00907956	-0.0124929	0.0166092	0.0174747	0.0307473	-0.00664352	-0.00890787	0.0363925	0.00429645	0.011047	0.0254507	0.0172902	0.0184698	0.0172771
chr16_29905788_29906127:+	-0.180895	-0.321248	-0.159071	-0.434992	-0.22168	-0.297973	-0.290628	-0.393226	-0.505943	-0.39919	-0.337997	-0.300726	-0.405267	-0.549409	-0.39902	-0.420715	-0.311506	-0.515492	-0.339651	-0.341475	-0.381986	-0.368453	-0.302468	-0.0971346	-0.365957	-0.392011	-0.347266	-0.266493	-0.332858	-0.421222	-0.351566	-0.231462	-0.401877	-0.36038	-0.372309	-0.154353	-0.416492	-0.332447	-0.331662	-0.488075	-0.3915	-0.452007	-0.407901	-0.454156	-0.283753	-0.381239	-0.186335	-0.405518	-0.461944
chr16_3850297_3851009:-	0.0296469	0.0491863	0.05608	0.101087	0.0355648	0.0949716	0.0372383	0.0388826	0.0157715	0.0161106	0.0371561	0.0273585	0.0254574	0.0358942	0.0273859	0.0957877	0.0728458	0.0384312	0.0213368	-0.0014155	5.67e-05	0.0562648	0.0637355	0.0460976	0.0464366	0.0591442	0.0527745	0.0169616	0.00765805	0.0131353	0.0142519	0.0615146	0.0874747	0.00859475	0.027983	0.092746	0.0256998	0.0352311	0.0613818	0.010994	0.00706906	0.036187	0.0206982	0.00566711	0.0422264	0.00805429	0.00606672	0.06253	0.0218218
chr16_47109483_47132025:-	0.00858962	0.0277635	0.00257052	-0.00137266	0.0106337	-0.00898977	0.00695797	0.000359393	-0.00730908	0.0469034	0.00986672	-0.0094655	0.0258133	0.0784856	-0.00485679	-0.012433	0.0107417	0.0690151	-0.0198525	-0.0062482	0.0144886	0.027927	0.0143697	0.0189805	0.0333309	-0.00224267	0.0978767	0.0336071	0.0285021	0.0209282	0.0137532	0.05005	0.0160817	0.0169367	-0.0102219	0.0697919	0.0363395	-0.029709	-0.00590231	0.0104626	-0.0236373	-0.0148308	0.0257933	0.0145683	-0.0109778	-0.00282513	-0.0021569	-0.00909705	-0.00250905
chr16_47497399_47515601:+	-0.0184964	-0.0108087	-0.0816707	-0.0671393	-0.0296312	-0.0643347	0.0242465	-0.0412645	0.059447	-0.0742142	0.0478464	0.0454934	0.0107951	0.0947828	-0.0708269	-0.0723716	0.0806261	0.0938009	-0.0161469	-0.0143981	0.0386378	0.00508958	0.0238233	-0.00694244	-0.0775057	-0.0418436	-0.0644128	0.0231984	0.123182	-0.0237985	0.0415161	0.0125858	-0.10361	-0.0737515	-0.0561414	-0.0919612	-0.0239276	0.0919775	-0.00966354	0.00680659	0.0942832	-0.0368357	0.0277367	0.067285	0.180171	0.0299174	-0.0387115	0.0648005	-0.019912
chr16_47497399_47596531:+	0.00603625	0.0350116	0.00222646	-0.00712296	-0.0109966	0.0272805	-0.00590819	-0.00229534	0.00290322	0.0138008	0.009929	0.0140632	0.0136013	0.00932996	0.0312337	-0.00499633	0.0391917	0.0266928	-0.00663316	-0.0155856	-0.0244835	0.0270545	0.0517009	0.0129788	-0.00846628	0.0195075	0.0138907	0.010872	0.00079467	-0.000900218	-8.49e-05	0.0195549	-0.00785425	0.0256228	0.0019096	0.0233375	-0.00713296	0.0138975	0.00192233	0.00061166	0.011994	-0.014288	-5.78e-05	0.0597024	-0.00749559	-0.00382873	0.00031358	0.0210671	0.0289383
chr16_48256610_48303305:+	-0.00872127	0.00492544	-0.0154498	-0.0189503	-0.0117584	0.00164445	-0.0098876	-0.00856281	-0.00610515	0.0195975	-0.0164635	-0.015855	1.72e-05	0.01481	0.0571644	-0.0208081	0.0131235	-0.00347474	-0.015129	-0.0034445	0.0413296	0.031945	0.023538	8.64e-05	-0.00185052	0.0195965	-0.0210414	-0.00878752	-0.0123823	0.00551403	-0.0202674	0.0142776	-0.00913416	0.116331	-0.00586513	-0.0159267	-0.00763222	0.00946296	-0.00676941	-0.0205414	-0.0140918	-0.018758	0.00218805	-0.0108193	-0.01089	-0.0190117	-0.00774027	-0.019624	-0.00483389
chr16_48277338_48303305:+	0.00645938	0.0238304	0.00914116	0.0169562	-0.000766698	0.0139669	0.00261019	0.00494598	0.00187407	0.00217936	0.0306243	0.0164838	0.00525496	0.0182734	0.0175743	0.0287063	0.0179785	0.0310166	0.00235108	0.00440167	0.0170291	0.0199451	0.0177892	0.0241622	0.00105305	-0.00401822	0.0163359	-0.00328588	-0.00317334	0.00372943	0.00316176	0.0087071	0.0361516	0.0306174	-3.18e-05	0.00268762	0.0142034	0.0241519	0.0118826	-0.000245825	0.0416258	-0.000766252	0.0261331	0.0278182	0.00557509	0.00358968	0.00438332	0.00398847	-0.0042908
chr16_53873786_53888951:+	0.197569	0.228442	0.0664536	0.028054	-0.0588414	0.0429922	0.0446867	0.0484972	0.0515181	0.0905123	0.0430254	0.110366	0.140043	0.140858	-0.0533928	0.0434062	0.052968	0.0785122	-0.00878553	0.101448	0.345046	0.0999303	-0.0468703	0.0791989	0.0603628	0.151324	0.164384	0.14878	0.095855	0.198098	-0.0164093	0.113449	0.181426	-0.0340699	0.00936826	0.0697705	0.0522382	0.139778	0.125425	0.132719	0.219543	0.0433059	0.130247	0.179435	0.166767	0.00220172	0.0822583	0.110816	-0.0158251
chr16_56351384_56355081:+	0.00758955	0.0177221	0.0215399	0.0137242	0.0192349	0.0794567	0.0120857	0.036325	0.0233801	0.0550541	0.0283934	0.00852438	0.0191958	0.0108946	0.00657669	0.0101448	0.0042991	0.0427585	0.0151862	0.063156	0.0513022	0.0912046	0.0231958	0.0444009	0.00665813	0.0340981	0.0288935	0.0403977	0.0250203	0.0387542	0.0485928	0.0333867	0.017964	0.0114971	0.0177222	0.0500723	0.00915339	0.0608481	0.0296414	0.0256275	0.0143464	0.0191036	0.0143332	0.0134153	0.0135078	0.0756487	0.00984352	0.010969	0.037046
chr16_67610824_67612121:+	-0.0298281	-0.00762164	-0.0474522	-0.0465562	-0.0369247	-0.0172755	-0.00899905	-0.036256	-0.0178729	0.019467	-0.0356178	-0.00802526	-0.0334159	-0.00184982	-0.0412785	-0.0153026	-0.0227186	0.00283388	-0.0344783	-0.0251904	0.00246796	0.0032683	-0.0253524	-0.0307021	-0.0053021	-0.0381129	-0.0184753	-0.0109793	-0.00205155	-0.0293182	-0.0326853	-0.00998865	-0.0194198	-0.0315966	-0.0366142	0.04486	-0.0297051	-0.0298746	-0.0418662	-0.0417125	-0.0211364	-0.0301291	-0.0378978	-0.0268724	0.00372342	-0.0295931	-0.0279856	-0.0283768	-0.0258984
chr16_68121987_68123121:+	-0.038712	-0.01556	-0.0333667	-0.0110338	-0.0336989	-0.00487678	-0.0258038	-0.0367657	-0.0146484	-0.0254478	-0.0256676	-0.018453	-0.0305159	-0.0121962	0.0105608	-0.0224572	-0.0323972	-0.0110348	-0.0206873	-0.0350983	0.0114768	-0.0222594	-0.0223191	-0.00248682	0.0106716	-0.0136098	-0.0129608	-0.0114254	-0.0372575	0.00308769	-0.0333884	-0.00381125	-0.0227759	-0.0430093	-0.0320341	0.0614712	-0.00733306	-0.0329597	-0.0325076	-0.012002	-0.0226858	-0.0337689	-0.0283929	-0.0194125	-0.0221189	-0.015392	-0.0184746	-0.00922122	-0.0414962
chr16_69284048_69284244:+	0.00281793	0.0142555	-0.00107211	0.0609473	0.0162129	0.0412414	0.0210367	-0.000509445	0.0120853	-0.00128509	0.0171609	-0.00149795	0.0150786	0.0189511	-0.00205322	0.0198622	-2.18e-05	0.00210018	0.00410953	-0.00097833	0.0350326	0.0671869	0.0387238	0.00880739	0.0104638	0.00582087	0.0228427	-0.00442602	0.043906	-0.00259623	0.017517	0.0546977	0.0253212	-0.00121681	-0.00113656	0.00143723	0.0170655	0.0479312	0.00312616	0.00415471	0.0245644	0.00323701	0.0118844	0.00715899	0.047717	0.00862366	0.0167634	0.00366956	0.00191513
chr16_69370483_69372355:-	-0.0160838	-0.0369928	-0.00675436	-0.0564686	-0.0322632	-0.0658382	-0.0662296	-0.0451796	-0.00391239	-0.0519858	-0.00707275	-0.0366512	-0.0451229	-6.25e-05	-0.0578232	-0.0373446	-0.0181931	0.0467999	-0.0190929	-0.0409176	-0.0411163	-0.0316385	-0.0401053	-0.0138035	-0.022187	-0.0648084	0.0137868	0.0473808	-0.0187009	-0.0498669	-0.0166768	0.0238392	-0.0254091	-0.00370907	-0.0459709	-0.026489	-0.0404075	-0.00585947	-0.0181431	-0.0121253	0.0125615	-0.0415819	-0.0686573	-0.0340358	-0.0432818	-0.0532103	-0.00779343	0.00702091	-0.0636474
chr16_7579777_7607338:+	-0.010901	-0.0587843	-0.0867374	-0.0478209	-0.0838367	-0.103173	-0.0982856	-0.0842993	-0.0194179	-0.0712973	-0.0778784	-0.0565107	-0.0708588	0.0546991	-0.0845569	-0.0617876	0.075897	-0.0717634	-0.0984647	-0.056034	-0.00104703	0.00816457	-0.00514517	-0.055348	-0.110425	-0.0928323	-0.00647288	-0.0420098	-0.0155609	-0.0657247	-0.0157597	-0.047603	-0.0254104	-0.117844	-0.0935262	-0.0208929	-0.0557796	-0.0501148	-0.099982	-0.068099	0.0238737	-0.0522475	-0.0304761	0.0102067	0.0101052	-0.0761486	0.0140282	-0.0795445	-0.0631738
chr16_7579780_7607338:+	-0.010901	-0.0587843	-0.0867374	-0.0478209	-0.0838367	-0.103173	-0.0982856	-0.0842993	-0.0194179	-0.0712973	-0.0778784	-0.0565107	-0.0708588	0.0546991	-0.0845569	-0.0617876	0.075897	-0.0717634	-0.0984647	-0.056034	-0.00104703	0.00816457	-0.00514517	-0.055348	-0.110425	-0.0928323	-0.00647288	-0.0420098	-0.0155609	-0.0657247	-0.0157597	-0.047603	-0.0254104	-0.117844	-0.0935262	-0.0208929	-0.0557796	-0.0501148	-0.099982	-0.068099	0.0238737	-0.0522475	-0.0304761	0.0102067	0.0101052	-0.0761486	0.0140282	-0.0795445	-0.0631738
chr16_80684538_80685129:-	-0.0989596	-0.115255	-0.213223	-0.190807	-0.150789	-0.133992	-0.121381	-0.115537	-0.0848985	-0.0566933	-0.105462	-0.134514	-0.0979759	-0.126022	-0.0802889	-0.0396187	-0.0629901	-0.0111373	-0.183572	-0.0914248	-0.0438995	-0.0818357	-0.0520334	-0.199544	-0.158408	-0.105672	-0.0914659	-0.0458216	0.00962477	-0.0374988	-0.108382	-0.096888	-0.128901	-0.0135163	-0.0842295	-0.0599762	-0.104328	-0.101847	-0.11602	-0.133849	-0.137426	-0.128816	-0.125929	-0.170468	-0.135137	-0.0746812	-0.144754	-0.113356	-0.161446
chr17_20017987_20110562:+	-0.00616162	0.0243774	0.0141317	0.00283959	0.00568096	0.0702108	0.0219436	0.00423719	0.0315339	0.00168056	0.0277007	0.0203389	0.00867673	0.00712766	0.0353448	0.00689026	0.0212959	0.000599927	-0.00377172	-0.000944142	0.103704	0.0204886	0.0167889	0.00821295	0.00309748	0.0114862	0.0302335	0.00820562	0.0090461	0.00536426	0.0122929	0.0262208	0.116329	0.00137133	0.00615563	0.0163983	-0.00660138	0.0457328	0.023384	0.0325444	0.0288886	0.0344808	0.00492162	0.0266387	0.0559193	0.00426	-0.00153849	0.0166035	0.000948412
chr17_20204333_20205912:+	-0.00801633	0.0650865	-0.0330723	0.171308	-0.00839141	0.043236	0.025138	-0.0440823	0.0222315	0.0690469	0.0398668	0.0281592	0.0868943	-0.00513579	-0.0325174	0.0471469	0.118898	0.243516	0.0266272	-0.0575542	0.113242	0.0421562	0.0470107	0.039273	0.0150994	0.0468021	0.0730626	-0.00706179	0.157194	0.0518995	0.00968058	0.0517526	0.137513	0.0614077	0.00883665	-0.0357284	-0.0275647	0.0990944	0.0358289	0.127488	-0.0797284	-0.0337815	0.0472819	0.0606826	0.106176	0.028611	0.0275585	0.0821543	0.0336511
chr17_28122603_28172618:+	-0.0749933	-0.00681074	-0.0397194	-0.138088	-0.13544	-0.0368907	-0.0659364	-0.0741217	-0.0478986	-0.0899085	0.0319445	-0.0712653	-0.0809147	-0.0107411	0.0529825	-0.00338196	0.0070406	-0.00827387	-0.09734	-0.0170343	0.098416	-0.0792194	-0.0658448	0.0144853	-0.0479781	-0.0879783	-0.0210382	-0.11621	-0.0226464	0.0182981	-0.0636086	-0.0314707	-0.0676577	-0.069999	-0.0517629	-0.139094	-0.146364	-0.00411604	-0.0464824	-0.0232086	-0.140407	-0.0722774	-0.0291034	-0.034686	-0.0240262	-0.063785	-0.0178299	-0.102873	-0.0295469
chr17_28163543_28172618:+	-0.0680378	-0.00846136	-0.0408834	-0.0359082	-0.0290374	-0.0525463	-0.0480713	-0.129061	-0.054994	-0.0418665	-0.0363549	-0.131967	-0.0611219	-0.0553974	-0.0173302	-0.0323776	0.114903	0.0061645	-0.0493496	0.0286351	-7.45e-06	-0.0386117	-0.0177953	-0.0611101	-0.137704	-0.0902597	-0.0233571	0.0484016	-0.109429	-0.00934605	-0.102243	-0.0208939	-0.112355	-0.100048	-0.127429	0.0462677	0.025202	0.0532095	-0.0376022	0.0524496	-0.117024	-0.0606327	-0.058753	-0.128322	-0.0268233	-0.0507706	-0.0262697	-0.05739	-0.145294
chr17_33088863_33112067:-	0.0120185	0.000331117	-0.0180716	-0.0103851	-0.00131019	-0.0267008	-0.0256125	-0.0129913	0.00270686	-0.0275193	-0.0276504	-0.0207865	0.0111634	0.000767862	-0.0169589	0.00402311	0.0191351	0.000982026	-0.0165066	-0.0224488	-0.0197	0.0155339	0.0179638	-0.014867	-0.0166357	0.0177019	-0.0154464	-0.0206352	-0.0176712	-0.021751	-0.0257593	0.0290441	-0.0325337	-0.000381593	-0.00185731	-0.0205356	-0.0205234	-0.0223948	-0.00658269	0.020131	0.00969316	-0.00708711	0.00783518	0.0327518	-0.0124351	-0.0207795	-0.0183077	-0.00790184	-0.00511209
chr17_36952886_36953907:+	-0.0170122	-0.0124824	-0.0208566	-0.00357862	-0.0286998	-0.0231243	-0.0326418	-0.015435	-0.0434985	-0.0504369	-0.0122688	-0.00706008	0.0161948	0.0282264	-0.0395496	0.00984372	-0.0425584	-0.0216482	-0.0346357	-0.0107095	0.0451371	-0.00416456	0.000810864	-0.0390721	-0.0281835	0.000851287	-0.0143077	-0.0299659	-0.0108799	-0.00825535	0.0288932	0.0240811	0.0177278	-0.0207187	-0.0183197	-0.0206508	-0.0378917	0.0363741	-0.0337182	-0.0368	-0.0409002	-0.0405769	0.0487771	-0.0093859	0.00682718	-0.0463341	-0.0198933	-0.0223284	-0.0270579
chr17_42498924_42501304:+	0.0741231	0.147579	0.17556	0.120006	0.0983594	0.142742	0.121594	0.0806864	0.0988689	0.0927787	0.113558	0.134683	0.105578	0.0562778	0.131252	0.0837104	0.139968	0.120979	0.0973695	0.125974	0.146645	0.104771	0.127225	0.134506	0.0879932	0.0708145	0.0845238	0.101117	0.104895	0.1541	0.0618187	0.126034	0.120383	0.084994	0.0953557	0.120276	0.113701	0.157924	0.0877979	0.124926	0.09719	0.0972977	0.108946	0.161115	0.130143	0.114084	0.079286	0.126093	0.0749946
chr17_4282798_4296814:-	-0.0500412	-0.0233183	-0.0627888	-0.0805643	-0.0737493	-0.0515846	-0.0796062	-0.0596844	-0.0570464	-0.0861462	-0.0191849	-0.0502576	-0.0122337	-0.0540048	-0.0388627	-0.0700727	-0.0244726	-0.0654859	-0.0691628	-0.0145729	-0.00726581	-0.0464536	-0.0347583	-0.0221315	-0.0769486	-0.0764609	-0.0598123	-0.0478043	-0.0441179	-0.0648114	-0.0679426	-0.0299021	-0.058885	-0.0687517	-0.0697896	-0.0647622	-0.0839823	-0.0601431	-0.0711755	0.00387135	-0.0694794	-0.0750161	-0.0648767	-0.0541056	-0.0459967	-0.0609281	-0.0269704	-0.0666962	-0.0646719
chr17_44084555_44087696:-	-8.49e-05	0.0219754	0.00460895	0.0423954	0.0168397	0.0151867	0.00784461	0.00863109	0.0196457	3.87e-05	-0.00401673	0.0553213	0.0267638	0.0613208	-0.000149992	0.0299308	0.0208124	0.0418704	-0.00584737	0.0015396	0.0377213	0.00551722	0.0421861	0.06471	0.00608355	0.0195865	0.0115982	0.0177421	0.0535511	0.0213031	0.0145332	0.0117254	0.0589662	0.00540661	0.0188206	0.0249188	0.0193756	0.00412169	0.0681072	0.003143	-0.00202546	0.00274711	0.0161461	0.0218794	0.0651468	0.0081124	0.00339014	0.0127512	0.0477758
chr17_46066537_46094701:-	-0.0163657	-0.00997114	-0.0163917	0.0128132	-0.0173061	0.0557449	-0.00908747	0.0100531	-0.0214325	-0.0321987	-0.0319028	-0.0120098	-0.0180511	0.0292568	-0.0281744	-0.0226112	-0.028326	-0.00590232	-0.0305587	0.0724185	0.0563237	0.020262	0.0647784	-0.0220174	-0.021154	0.00480875	0.00404413	-0.0224712	-0.00965957	-0.0186531	-0.0303728	0.0216612	-0.00480159	-0.0119435	-0.0218644	-0.00923064	0.00548035	0.0095381	0.000825047	-0.0237605	-0.00786777	-0.023446	-0.00150955	-0.00101987	-0.0120551	0.0114056	-0.00947931	-0.00448129	-0.0128146
chr17_48112031_48113401:+	0.0141642	0.00999223	0.0251307	0.000393359	-0.014166	0.0216226	-0.0152803	0.00301833	0.00756115	0.0201271	0.00954252	0.0199808	-0.00336852	-0.0221824	0.0571633	0.0165187	0.0349918	-0.025767	0.00588019	0.0344458	0.0114618	0.0365231	0.020677	0.0471669	0.0111144	-0.00629996	0.0156219	0.021876	0.00398202	0.0168603	0.04041	0.0206711	0.0105975	0.0436475	0.0364293	0.0475652	-0.0164885	-0.00936701	-0.0215764	-0.0177237	0.0227138	-0.0170025	0.00831625	-0.00125579	-0.0022573	0.0275807	0.0130074	0.00244872	0.0154431
chr17_51263274_51268904:+	-0.0785631	0.0167469	-0.0167449	-0.072843	-0.0358187	-0.0545447	-0.0551485	0.00202933	-0.0666252	-0.0372948	-0.0821663	-0.0664469	-0.0520075	0.0810423	-0.0524087	-0.0770617	-0.017764	-0.0221235	-0.0614227	-0.026641	-0.0776131	0.0474281	-0.0411195	-0.0329251	-0.0558421	-0.0505603	-0.00876997	-0.0367328	-0.0596645	-0.0813054	-0.0871833	0.00705441	-0.056664	-0.0652373	-0.0498493	-0.0694475	-0.0355069	-0.0397877	-0.0291722	0.00274135	0.0737567	-0.0988972	-0.0366575	-0.0634858	-0.0245463	0.00684707	-0.0536172	-0.0597437	-0.086714
chr17_56848696_56856625:+	-0.0133568	0.00770325	0.0051903	-0.00452259	0.00957482	0.0250397	-0.0175139	0.000226358	-0.0105549	-0.0103482	0.00304061	-0.0194101	0.0197621	0.0102753	0.0215177	0.0166585	0.0108292	-0.00779741	0.0268935	0.0173619	-0.00559638	0.029401	0.0123413	0.0265998	-0.00225177	-0.00893215	0.0524641	0.00363367	-0.00796073	-0.00908694	0.00051123	-0.00053805	0.0116444	-0.00301569	-0.00255894	-0.0227237	0.00442696	0.030875	-0.0139942	-0.0124266	-0.0175613	-0.0125595	0.00729	0.0199787	0.0118153	-0.00798672	-0.00607774	-0.00668481	-0.011418
chr17_59353215_59353526:+	-0.0124738	-0.00414915	-0.0102149	-0.00306708	-0.00821302	0.00999839	-0.0166758	0.000472899	-0.0171826	-0.0181421	-0.00147889	-0.00687578	-0.0171764	0.0189154	-0.0260142	0.0118438	0.0166754	-0.0190524	-0.00219702	-0.0159301	0.0453297	0.0185283	-0.0232984	-0.0168669	-0.00645383	-0.00839824	0.00143601	-0.0187874	0.00583302	-0.00841091	-0.0034045	0.0106584	-0.00425063	-0.0157696	-0.0161269	-0.0104767	-0.00372019	-0.0114266	-0.0167857	-0.0180741	0.00548343	-0.0165094	-0.00341467	0.000808312	-0.00753531	-0.0109539	0.0316228	-0.00673118	0.00549528
chr17_59731421_59738947:+	0.0108934	0.0758997	-0.00591637	0.000495957	0.0155607	0.0564969	-0.107204	-0.0278029	-0.0579892	-0.00372295	0.0596796	0.0178829	-0.00176659	0.123215	0.0109889	0.00380073	0.0384671	-0.023914	-0.00867453	0.038763	0.148723	-0.0256223	0.0967585	0.115208	-0.0364899	-0.0478809	0.0442268	-0.0538546	0.00676302	-0.029782	-0.127126	-0.0115486	0.0979046	-0.0568555	-0.0856678	0.0687428	-0.0530923	0.0101181	-0.037826	-0.0460682	-0.0135709	-0.0482961	-0.00117927	0.0441045	0.0475301	-0.0746403	-0.0211066	-0.0340263	0.00656979
chr17_59731421_59773885:+	0.0185365	0.0906195	-0.022739	-0.064877	0.0775277	0.0649105	0.053778	0.00352841	0.0460697	0.0498076	0.0633678	0.11979	0.0941658	0.196024	0.0867934	0.0728844	0.15516	0.253988	-0.00901531	0.0748085	0.148842	0.114199	0.191585	0.0631759	0.0258879	0.0345893	0.119729	0.0669821	0.101379	0.0267518	-0.0687195	0.121914	0.139184	0.0950469	0.0303385	0.067849	-0.0165764	0.023011	0.0979528	0.0886819	0.0629237	0.040579	0.117162	0.135996	0.114104	0.00501062	-0.0131161	0.0971718	0.130296
chr17_63151270_63200957:+	-0.0889705	-0.0759464	-0.0739321	-0.0457282	-0.0528134	-0.0749344	-0.0612646	-0.0918743	-0.0357907	-0.0594343	-0.0962161	-0.0853732	-0.0644931	0.0667295	-0.0253708	-0.0890862	0.0051701	-0.0222576	-0.0476719	-0.042128	-0.0936743	-0.00688047	-0.0455475	-0.0173465	-0.0499809	-0.040248	-0.0126044	-0.0682779	0.000626932	-0.0783567	-0.0751457	-0.0854147	-0.0359265	-0.101652	-0.0876488	-0.0896358	-0.0918157	-0.0746882	-0.0159833	-0.0239184	-0.0841305	-0.0913106	-0.0317882	0.00176113	-0.0508506	-0.0508171	-0.0500655	-0.0412665	-0.0961773
chr17_63151270_63238077:+	-0.0235691	0.0126645	-0.0142128	-0.0226012	0.0122838	-0.0121598	-0.0172997	-0.025018	-0.0212798	-0.00570593	-0.00995797	0.00565126	0.00317151	0.0189345	-0.0270567	-0.02544	-0.0188793	-0.00313182	-0.0262445	0.0122809	0.0150175	-0.023727	-0.018437	0.0185198	0.0345338	-0.0189596	-0.0207289	0.0150813	0.0426338	0.0169127	-0.0215333	-0.0199322	-0.0302965	-0.0268542	-0.0211651	-0.00883253	-0.0250792	0.000621023	-0.0267978	0.039333	-0.00487868	-0.0254749	-0.0158888	-0.00850571	0.0184508	-0.0278915	-0.018285	-0.00637092	-0.0328639
chr17_66687111_66689047:+	-0.0308985	-0.0301379	-0.023162	-0.0220114	-0.0215508	-0.0127666	0.0242102	-0.0330003	-0.0252784	0.010401	-0.00213372	-0.0360512	-0.0184077	-0.0300023	-0.0349454	-0.0057891	0.0647152	-0.0179957	-0.0334427	-0.0136763	-0.0146075	0.00308859	0.00704704	-0.000362044	-0.0443284	-0.0260054	0.0161774	0.00179603	0.0316527	-0.0243554	-0.00291491	-0.00570866	-0.030289	-0.00610546	-0.0207775	-0.0129774	0.009099	0.0337316	0.0607276	-0.0298028	0.0276607	-0.0349245	-0.0416124	-0.00458963	0.00805348	-0.0309043	-0.0325267	-0.00913845	-0.0101723
chr17_67532802_67553617:+	-0.0400119	-0.0198638	0.000245447	-0.0161989	0.00577487	0.0247679	-0.0337214	-0.00908499	-0.0142599	-0.0309694	-0.00314433	-0.023953	0.00458172	0.0208452	-0.0203764	-0.0191213	-0.0209943	0.00400376	0.0180957	-0.0320098	-0.0221123	-0.0202774	0.0474227	-0.00216218	-0.0115522	-0.00273208	0.00558605	-0.0376972	-0.025875	-0.0200933	-0.0125363	-0.0190411	-0.0230306	0.00641296	-0.0203479	-0.00342537	-0.0223983	-0.00358583	-0.0225445	-0.00552223	-0.0127006	0.00396109	-0.018677	-0.0079059	-0.0229104	-0.0239942	-0.0135319	0.0165308	-0.0108559
chr17_67945409_67975958:+	0.0018737	0.0966238	0.0321637	0.0461048	0.0567072	0.0260418	0.0442037	0.0484875	0.0196579	0.017088	0.0285518	0.0142291	0.0487514	0.0269855	0.0294903	0.035641	0.0462668	0.0525461	0.0219423	0.0274859	0.0316398	0.0762026	0.048273	0.0453496	0.0491684	0.0338627	0.0359251	0.0612863	0.0525343	-0.000979574	0.0681617	0.0280558	0.00329417	0.0278552	0.0589516	0.0482693	0.080645	0.0369276	0.0401334	0.0184432	0.0280254	0.00976337	0.0740242	0.0437258	0.039573	0.0967478	-0.0139629	0.0477282	0.0584722
chr17_8238031_8238629:-	0.0236196	-0.0106871	0.00225324	-0.0149955	-0.00278093	-0.00479237	0.00762329	-7.96e-05	0.0170646	0.00602253	0.00107772	0.01591	0.0118416	-0.0120259	-0.0172508	0.00957436	0.000533314	0.00274755	0.0154484	-0.0211636	0.0105584	0.0103887	0.00203159	0.00049934	-0.0195513	-0.0112711	-0.00439194	0.00249458	0.0252174	0.00936224	0.0110477	0.0172846	0.00961521	-0.000741595	-0.0136646	0.00441013	-0.00305527	0.0131215	-0.00999888	-0.0148386	0.00527422	-0.0116779	0.0187113	-0.0117269	0.0156499	0.0232594	0.0109131	-0.00259722	-0.0178211
chr17_82563354_82568201:+	-0.0191741	-0.0302754	-0.0136845	0.0287558	-0.0262868	-0.0106425	-0.0303517	-0.0252906	-0.0166394	-0.0328882	-0.0248327	-0.0198085	-0.0018877	0.00458119	0.00323737	-0.0170537	-0.047944	-0.0278056	-0.043811	-0.0425998	-0.033377	0.0191988	0.0126952	-0.0426764	-0.0307518	-0.0146861	-0.00329924	-0.0189057	-0.0382988	-0.0397896	-0.0465258	-0.000980452	0.0300605	0.0190858	-0.0126037	-0.0316886	-0.0227091	-0.0574748	-0.0455265	-0.0304813	-0.0556522	-0.0535896	0.0267537	0.045014	0.025703	-0.0223071	-0.0186951	-0.0299478	-0.0687405
chr17_82763965_82781721:+	-0.0129235	0.012219	-0.00172651	0.0407757	0.0138762	-0.00603031	0.00486796	-0.011736	0.0155114	0.0153833	0.0089647	0.00139654	0.00282343	0.0116219	0.0673211	-0.0054644	-0.0108551	-0.00412014	0.00734491	-0.0102673	-0.0134007	0.0534582	0.0171398	0.0387663	0.0217156	-0.000171514	0.022327	0.0148376	0.0605357	0.0151653	0.0228409	0.000912045	0.018035	-0.0175303	0.00526691	-0.00786756	-0.00674066	-0.00426742	-0.002872	0.0141055	0.0192828	0.0212027	-0.00198733	0.013061	0.0284498	0.00111778	0.000510578	-0.00538186	-0.00456938
chr17_9940126_9946983:-	0.0706152	0.0980581	0.107371	0.0573495	0.0643658	0.182244	0.0289509	0.0627535	0.0630544	0.0970005	0.0613075	0.0630228	0.12224	0.142788	0.133255	0.167222	0.0732234	-0.000361061	0.10177	0.0779713	0.11116	0.0923068	0.126818	0.110158	0.0775791	0.109803	0.137627	0.0444835	0.113197	0.167009	0.0293504	0.0749385	0.0930919	0.18475	0.0695691	0.0132543	0.0499691	0.206301	0.0437891	0.117801	0.0962452	0.040247	0.0639412	0.150064	0.0705762	0.154318	0.0454365	0.0508019	0.0848671
chr18_12999421_13019206:+	-0.042474	-0.0283748	-0.0263521	-0.015552	-0.0368687	-0.0132043	-0.00864914	-0.0318835	-0.0206824	-0.00358241	-0.0133191	-0.0347193	-0.00351103	0.0258467	-0.0207061	-0.00883858	-0.0173107	-0.0363008	-0.030461	-0.0798051	-0.0435401	-0.0209432	0.0230865	-0.022669	0.0190366	-0.00459331	-0.0205612	-0.0397011	-0.0135955	0.00868867	-0.0493888	0.0342685	-0.0248734	-0.0331796	-0.0279496	0.00170062	-0.0136424	-0.0305936	-0.0375636	-0.0410935	-0.0395128	-0.0390373	-0.0235253	-0.0247278	-0.0344784	-0.0355149	-0.0357272	0.0223981	-0.0399505
chr18_20991176_21020239:-	0.0228344	0.0314056	-0.0288454	-0.0297084	-0.00318151	0.0243784	-0.00189056	-0.0220736	0.00930095	0.00594231	-0.0141152	0.0389557	-0.0147327	-0.00347462	-0.00755787	0.0159396	0.256499	-0.0100643	0.00379086	-0.00660816	0.0901594	0.0881092	0.0800221	0.0817042	-0.00220215	0.0249327	0.0202199	0.0380483	0.00628908	0.0256744	-0.0239881	0.0313846	0.141162	-0.0293692	-0.00154718	0.0557645	0.0148513	0.0457874	-0.0244074	-0.0167563	0.0772923	-0.0221358	0.0326083	0.0548189	0.0187204	-0.0131052	-0.00830891	0.020315	0.0355989
chr18_21765772_21779685:+	-0.318783	-0.194891	-0.382372	-0.158597	-0.265994	-0.240107	-0.182386	-0.230522	-0.310219	-0.207245	-0.298092	-0.265528	-0.171373	-0.146634	-0.173071	-0.254751	-0.290314	-0.241405	-0.217587	-0.207642	-0.0121349	-0.157549	-0.159442	-0.244518	-0.188741	-0.163579	-0.175379	-0.237985	-0.118674	-0.24285	-0.255135	-0.165356	-0.0005914	-0.231954	-0.0647494	-0.267108	-0.191932	-0.327173	-0.281681	-0.191724	-0.269377	-0.173391	-0.117884	-0.240131	-0.246027	-0.252329	-0.318415	-0.195171	-0.208498
chr18_21765772_21819646:+	-0.0984785	-0.0514871	-0.125863	-0.0214463	-0.0649597	-0.0664627	-0.074919	-0.0657118	-0.096131	-0.0825368	-0.0672793	-0.0487856	-0.0676415	-0.028061	-0.0706843	-0.102711	-0.0306572	-0.057093	-0.0545236	-0.0949001	-0.0472691	-0.068573	-0.0755787	-0.0435345	-0.078682	-0.0651386	-0.0945664	-0.0882708	-0.0540842	-0.0603974	-0.0709669	-0.0480291	-0.0305561	-0.0746667	-0.0706247	-0.0885457	-0.0470447	-0.0789793	-0.0812637	-0.0970352	-0.0707471	-0.0828613	-0.0635905	-0.082503	-0.0630128	-0.0997793	-0.0695215	-0.0236293	-0.0258867
chr18_24064140_24083081:+	-0.0647381	0.0130956	-0.082074	-0.117564	-0.052825	-0.0636738	-0.0165772	-0.0576333	-0.0194303	-0.0322715	-0.0323776	-0.00907033	-0.0392324	-0.00035659	-0.0415165	-0.0407511	0.0229625	0.0022601	-0.0600612	-0.0565749	-0.070417	0.0214757	0.0319719	-0.0455575	-0.0495507	-0.0472234	0.000668805	-0.00815478	-0.0386392	-0.0545593	-0.0697206	-0.0341737	-0.0595104	0.0167702	-0.0742848	-0.0787223	-0.0349331	0.00385836	-0.0414812	-0.0281901	-0.0769334	-0.0469372	-0.0242695	-0.00375181	0.00487768	-0.0881874	-0.0178734	-0.0272883	-0.0541152
chr18_24143091_24143413:+	-0.00420176	0.00752021	-0.0216995	-0.0367165	-0.012871	-0.00791001	-0.0269528	-0.0243258	-0.0349737	0.0142049	-0.0460577	-0.0182848	-0.000974313	-0.0185616	-0.0298658	-0.00711936	0.0363489	0.0222338	-0.0105026	-0.0172279	0.0226728	-0.0337443	0.00665481	-0.0189164	-0.00581158	-0.0244733	-0.0208389	-0.0284633	-0.0266162	-0.031992	-0.0334678	0.014977	-0.00305549	-0.0295918	-0.0358458	-0.035151	-0.0345563	-0.025024	0.0233046	0.00492615	0.00239765	-0.0354522	-0.0118348	0.0109498	-0.0140915	-0.0420691	-0.0255954	-0.00633656	-0.0300128
chr18_24196125_24239382:-	-0.00775964	-0.0421889	-0.0147707	-0.0126418	0.021764	0.0895353	-0.0336026	-0.037076	-0.0411794	0.0954221	-0.0457513	-0.040881	0.000264341	-0.0528976	0.035901	-0.0620547	0.0241049	-0.041703	0.0218935	0.10002	0.0421927	-0.037008	-0.0768974	0.044905	-0.0108868	-0.0648305	0.0115223	0.00521413	-0.0262491	0.0118942	0.0121876	-0.0371036	-0.0315172	-0.0264028	-0.0257071	-0.0394036	-0.0222042	-0.0305819	-0.00574039	-0.0428786	-0.00472704	-0.016918	-0.00216039	0.0182026	-0.0175111	0.0334833	-0.0128401	-0.0573359	-0.00978725
chr18_24225042_24239382:-	-0.0176195	0.0251078	-0.00897478	0.0237811	-0.00742046	-0.0144842	-0.0024925	-0.00811071	-0.00145358	-0.0244985	0.00180545	-0.0286813	-0.0071919	0.0122586	-0.034142	-0.0335832	-0.0253839	-0.0070132	-0.0197474	0.048641	-0.0125164	-0.00771041	0.0217359	-0.00768064	-0.0121633	-0.0281378	-0.01841	-0.0279484	-0.0364457	0.00886363	-0.0169494	-0.00133649	0.0209978	0.002101	-0.0227948	-0.0250401	-0.00624818	0.00324428	-0.0187331	-0.0168295	-0.019968	-0.0173059	-0.0251722	0.0136413	-0.00645493	-0.00652729	-0.016982	-0.0246085	-0.00377909
chr18_32111754_32124845:+	-0.0240527	0.0578863	-0.0390022	0.0315558	-0.040018	0.0991634	0.0146596	0.000394997	-0.0375523	0.0555017	-0.0286996	-0.000451921	0.0124456	0.0667401	-0.0158733	0.173904	-0.0452899	0.0245063	-0.00732167	-0.0320299	-0.0444104	0.0847458	-0.0141982	-0.0410076	0.0679913	-0.000380685	0.0448244	-0.00853019	0.0213064	-0.019799	-0.0245208	0.151932	-0.00360172	-0.0206759	-0.0285241	-0.00957963	-0.0328696	-0.0214262	-0.0181137	-0.0172336	-0.027494	-0.0345445	0.0325817	0.00541188	0.00191818	0.0088673	-0.0213359	0.0123342	0.00746283
chr18_34755976_34794250:+	-0.0203583	-0.0140458	-0.0181532	-0.0186631	0.0126933	0.00242118	-0.0321453	0.00555477	0.00156362	0.00736055	-0.0291749	-0.00938417	-0.00562639	0.0650946	-0.0173982	-0.0295353	-0.0276783	0.0242013	-0.0243204	-0.0041151	-0.00862101	0.0678501	0.000290539	-0.0157907	-0.0198059	-0.00110396	0.0102761	0.001504	-0.00504855	0.0170172	-0.0104069	0.0178906	-0.0182176	-0.0210303	-0.0234989	0.0222283	-0.00850908	0.0206163	0.0365496	-0.0218278	-0.0259112	-0.0119309	0.00667172	0.00318055	0.0417916	0.0247002	-0.000167523	0.000661186	-0.0152764
chr18_36026900_36033837:-	-0.0296726	-0.0576256	-0.0541984	-0.0833109	-0.0515509	-0.0475698	-0.0653454	-0.0514764	-0.0401928	-0.0812199	-0.0489437	-0.036894	-0.0616881	-0.0293019	-0.057312	-0.052654	-0.0621901	-0.0434589	-0.059407	-0.0343012	-0.0406903	-0.0512098	-0.0751488	-0.0628	-0.0242721	-0.0605362	-0.00812361	-0.0309544	-0.0100896	-0.0503604	-0.0551684	-0.0364871	-0.0890225	-0.0537745	-0.0655089	-0.0673258	-0.043687	-0.0312292	-0.0142528	-0.0580224	-0.0448151	-0.0462955	-0.0373179	-0.0698158	-0.0405931	-0.0438914	-0.00672203	-0.0455579	-0.0435606
chr18_42027443_42049605:+	0.00642066	0.0933008	0.00568938	0.00267585	0.0128535	0.0229436	0.040143	0.0154198	0.0342514	0.0435853	0.0615344	0.0156529	0.0118256	-0.00981998	0.008651	0.0389868	0.113722	0.017772	0.0093153	0.00283074	0.0781843	0.0522222	0.055778	0.0107055	-0.0140631	0.00749166	0.0371101	0.0185139	0.133369	0.0354767	-0.00420166	0.00426832	-0.00649115	-0.0221298	-0.00803063	0.0069918	0.0394825	0.0911502	0.0467537	0.0126016	0.00996228	0.0171304	0.0440951	-0.00570885	0.0698883	0.00724208	0.0136937	0.0370784	0.0193224
chr18_46946057_46946923:+	-0.0640262	-0.0223149	-0.145804	-0.0767716	-0.0980617	-0.0499423	-0.125104	-0.0945938	-0.0682969	0.0909226	-0.0819301	-0.023931	0.0061609	-0.0451223	-0.0770052	0.0412884	-0.00284383	0.0641168	-0.0858093	-0.040093	0.0661381	-0.0589856	0.13009	0.0163972	-0.0188245	-0.00246406	-0.00194969	-0.105649	0.0338356	-0.0325745	-0.10357	-0.0112215	-0.0775634	0.048216	-0.0275608	-0.049308	-0.104032	0.0894213	-0.0553866	-0.0437978	-0.0552745	-0.0859064	-0.028607	0.0531471	-0.014371	-0.0894738	-0.0404109	-0.0720874	-0.0691719
chr18_47865059_47896809:-	-0.00616178	-0.00746174	-0.0205134	-0.0333664	-0.0164594	-0.0202248	-0.0307411	-0.0195003	-0.0287136	0.0111843	-0.00476607	-0.0123937	-0.0110863	-0.00674206	-0.00414268	-0.0260389	0.0320593	-0.00638642	-0.0182554	-0.0119645	-0.0257681	-0.0179517	-0.0160805	-0.0238771	-0.00783185	-0.03724	-0.0132246	-0.0141626	-0.0254877	-0.0272089	-0.0342564	-0.0149461	-0.0288189	-0.0226642	-0.02042	-0.0187336	-0.00716005	-0.0273402	0.00134148	-0.0233363	-0.0102469	-0.00891114	-0.00561555	-0.0332729	-0.0103311	0.00279996	-0.0234591	-0.0266823	0.0143615
chr18_49331864_49379758:-	-0.0266418	-0.030509	-0.0453135	-0.00717067	-0.0294688	-0.00466839	0.0055208	-0.0325679	-0.0248527	-0.0349428	0.00774299	-0.00881514	-0.0274366	-0.0219451	-0.0292699	-0.0351909	0.0108167	0.00851061	-0.023011	-0.0407887	-0.0300771	0.00704534	-0.00470265	-0.0340925	-0.0458361	-0.0164783	-0.0415942	-0.000513269	0.0102036	-0.00787514	0.010163	-0.0141316	-0.0413851	-0.000715567	-0.0341574	-0.00234451	-0.0285486	0.00882134	0.00290604	-0.0412478	-0.0139926	-0.0387183	-0.0133784	-0.020935	0.00969221	0.00559147	0.0308918	0.0181342	-0.010082
chr18_54277703_54287411:+	0.0198816	0.00165289	-0.00766341	-0.0172489	0.00622902	-0.0130978	-0.00930361	-0.0127763	-0.0177794	0.00199634	-0.0195722	0.0116654	-0.0099537	-0.0149176	-0.000367323	-0.0168307	0.0197645	-0.00340568	0.00612872	-0.00380612	0.0146209	0.0117738	-0.00704368	-0.00452516	-0.0187269	-0.0241594	-0.0154091	-0.0252789	0.0429904	0.00305928	-0.0240217	0.00351111	0.00306847	0.000751207	-0.0161869	-0.0172661	-0.0138946	0.0316791	-0.0111002	0.00619349	-0.0149116	-0.0128985	-0.0153682	0.023755	-0.00257984	-0.0122491	-0.0130332	-0.0181713	-0.00425286
chr18_55350359_55351000:-	-0.00690912	-0.0221095	0.0203169	-0.00975129	0.00263578	-0.0156178	0.0104555	-0.00271062	0.0515157	0.011512	0.00570441	0.0267944	0.0237197	0.0014001	0.0042833	0.021259	0.00315161	-0.00703433	-0.017715	-0.000479346	0.0376221	0.0277338	-0.00484518	-0.0011419	-0.00302306	-0.0102319	0.024327	0.0126533	0.00178095	0.0100696	-0.00759081	-0.00513428	-0.00247606	0.0194022	-0.000668861	-0.0133697	0.00126844	-0.0119763	-0.00707806	0.0155929	-0.018656	0.00669208	0.00398401	-0.0112411	0.0215608	0.0149406	-0.0153937	0.00301157	0.0258405
chr18_55350359_55351003:-	-0.00690912	-0.0221095	0.0203169	-0.00975129	0.00263578	-0.0156178	0.0104555	-0.00271062	0.0515157	0.011512	0.00570441	0.0267944	0.0237197	0.0014001	0.0042833	0.021259	0.00315161	-0.00703433	-0.017715	-0.000479346	0.0376221	0.0277338	-0.00484518	-0.0011419	-0.00302306	-0.0102319	0.024327	0.0126533	0.00178095	0.0100696	-0.00759081	-0.00513428	-0.00247606	0.0194022	-0.000668861	-0.0133697	0.00126844	-0.0119763	-0.00707806	0.0155929	-0.018656	0.00669208	0.00398401	-0.0112411	0.0215608	0.0149406	-0.0153937	0.00301157	0.0258405
chr18_56758865_56781656:+	-0.0397832	-0.0615713	-0.0596155	-0.0381774	-0.0335518	-0.0352696	-0.0737013	-0.0395444	-0.0217594	-0.0374229	-0.0519938	-0.0366786	-0.033024	-0.0204415	-0.0577122	-0.0308973	0.0141284	-0.023509	-0.0406381	-0.04469	0.0671465	-0.0325985	0.0321186	-0.0409554	-0.0547303	-0.0706443	-0.0171841	-0.0433832	-0.015026	-0.0441418	-0.04288	-0.0241946	-0.0239854	-0.0254536	-0.0652194	-0.0528974	0.0078706	-0.00491865	-0.0622098	-0.019688	-0.0393859	-0.0802081	-0.0602089	-0.00894817	-0.0156639	-0.0727084	-0.040648	-0.0523962	-0.0166816
chr18_56776782_56880165:+	-0.0179225	0.0177816	-0.0223101	-0.00608288	-0.0220412	-0.024338	0.00929219	-0.0120461	-0.00612661	-0.0238766	-0.0201593	-0.0187467	-0.00367813	0.0123853	-7.44e-05	0.000383656	-0.00649637	-0.00656864	-0.00655114	-0.0168681	0.0947233	-0.00323398	-0.00463256	0.0105373	-0.0234977	0.00629672	0.0134928	-0.017392	-0.0251186	-0.0204151	-0.0157049	-0.0269537	-0.0244807	0.0295214	0.00848852	-0.0230083	-0.00392032	-0.0203338	-0.0234806	-0.0192773	-0.017572	-0.0201746	-0.0180224	-0.0034428	0.0133981	-0.0176569	-0.00824177	-0.0158817	0.00183084
chr18_58165788_58252054:+	0.0300236	0.0781454	0.00237564	0.073913	0.0625422	-0.00470484	-0.00268106	0.0047188	0.0680699	-0.0107781	-0.00431831	0.00826005	0.0519719	0.0511404	0.0435771	0.017115	-0.00495569	0.0619375	0.0139891	0.0526782	0.0970248	0.000423363	0.116805	0.0103305	0.015922	0.0329676	0.121968	0.0222138	0.00289732	0.0599948	0.00585787	0.0710059	0.116621	0.0820341	0.0148414	0.0273553	0.00579517	0.00380121	0.0157332	0.130313	0.0947684	0.00347234	0.0652025	0.0778776	0.0515208	0.00311007	0.0150413	-0.00190612	0.0528458
chr18_61490402_61507560:+	-0.0306218	-0.0228307	-0.0134527	-0.00851659	-0.0159911	-0.0118873	-0.0387334	-0.0311379	0.00470859	-0.0415086	-0.0103786	-0.0203409	-0.0088262	0.0222845	-0.0261307	0.0395598	0.00434169	0.032079	0.0451937	-0.0373178	0.000352736	-0.0269642	-0.0228664	-0.0319873	-0.0273144	-0.0199537	-0.0189219	-0.0101827	0.00861314	-0.0292917	-0.0344732	-0.00474198	-0.0266112	-0.0283857	0.00137875	0.0386482	-0.026099	-0.0250456	-0.017043	-0.0266502	-0.0114874	-0.0270283	-0.0220694	-0.0284526	0.00566329	-0.0176038	-0.0234224	-0.0289571	-0.0216596
chr18_62544802_62556297:+	0.0702176	0.0882818	-0.000939154	0.0817189	0.0750737	0.0570932	0.046927	0.0206467	0.044556	0.04889	0.0682533	0.0326204	0.0789483	0.121571	0.00779452	-0.00810125	0.0366214	0.0131352	-0.0035052	0.0492769	0.180918	-0.0115866	0.155216	0.134559	0.104042	0.0516746	0.100792	0.0162223	0.0190241	0.0648029	0.024026	0.0745126	0.124682	0.105827	0.0439898	0.0272952	0.00484911	0.0241498	0.0441724	0.0308486	0.074276	0.0190017	0.0747449	0.0384055	0.0120688	0.0641815	0.0142473	0.0523859	0.0174586
chr18_76849526_76851939:+	-0.0080286	-0.0397231	-0.0529515	-0.0334043	-0.0435203	-0.0554961	-0.0181817	-0.0471752	-0.0138345	-0.0503176	0.0089971	-0.0064913	-0.0501085	-0.0339568	-0.0713597	-0.0435284	0.0650767	0.00565834	-0.0188415	-0.0799105	-0.016716	0.15307	-0.00443333	-0.0374065	-0.0673595	-0.0402655	-0.0416425	0.00110131	-0.0365586	-0.0177792	-0.0533203	-0.039736	-0.0776153	-0.0529057	-0.0577531	-0.00227361	0.0137022	0.0955264	-0.0151682	-0.0292397	-0.0122885	-0.0621195	-0.0467034	0.00202686	-0.00241032	-0.00728794	-0.015264	0.000730754	-0.0221629
chr18_76849526_76871825:+	-0.0291347	0.0037574	-0.0182924	0.0208772	-0.0108208	-0.00664152	-0.002191	-0.00249747	-0.00457861	0.0178014	-0.0245604	-0.0052465	-0.00626425	0.0392153	-0.00419943	-0.0188731	0.000363066	0.0166679	-0.0124183	-0.00192652	-0.00210131	-0.0160003	-0.00190518	0.00724976	0.0307858	-0.00123883	0.0159949	0.0233933	0.000509341	0.000970265	-0.0221982	0.0180049	0.00537052	0.0333734	-0.000878252	-0.0148628	-0.0147433	0.00505515	-0.00413467	-0.0154169	-0.0215941	-0.0160033	-0.0185902	0.0286844	0.0424557	-0.000617977	0.00460718	-0.00749623	-0.0320028
chr18_76849526_76881512:+	-0.0163185	-0.0538492	-0.0168923	-0.0570564	-0.0365129	-0.0550005	-0.0687926	-0.0619686	-0.0427577	-0.0510448	-0.0514554	-0.0187523	-0.0338567	-0.0240082	-0.0654679	-0.0114795	-0.0483524	-0.0162748	-0.0470394	-0.0838996	-0.0566112	0.0156957	-0.0178538	0.00888003	-0.0829137	-0.0419743	-0.0404597	-0.00418533	0.000174492	0.0018427	-0.0627887	-0.0484626	-0.0793219	-0.0280498	-0.0451868	-0.0271333	-0.0530483	-0.0824596	-0.0355778	-0.079812	-0.0425531	-0.078363	-0.0519261	-0.0310858	-0.0874522	-0.0535261	-0.0582175	-0.0327729	-0.0333432
chr18_79096476_79154555:+	0.0126468	0.0411191	0.00145593	-0.000392278	0.000135788	0.00848203	0.010993	0.0167583	-0.000162784	0.000299235	0.0138475	0.0158285	0.0462465	-0.00101432	0.0312827	0.00242148	0.0942593	0.0579907	0.0267192	0.0432855	0.00200909	0.026525	0.0074864	0.0617841	0.0499628	0.0059293	0.0334516	0.00808119	0.0155307	0.0414263	0.0188418	0.0370532	0.0136443	0.0404568	0.0318057	0.0291132	0.00357968	0.00671975	0.0270736	0.00306001	0.0411913	0.00211762	0.00411494	0.026726	0.0092891	0.0187209	0.00490677	0.046865	0.0889888
chr18_79193183_79214038:+	0.00520667	0.0456549	-0.0211874	-0.0137223	-0.0127324	0.00605463	0.0371063	-0.0182077	0.0604137	0.00843279	-0.0193119	0.0560433	0.00349501	-0.0039057	-0.0156302	0.0438133	0.0906827	-0.0263585	-0.0138656	-0.0065357	-0.00694177	0.0446873	-0.0265902	-0.0212764	0.0184244	0.000389443	0.0524109	0.035912	0.00387138	0.00350389	-0.0256966	0.029314	0.00657233	0.00134112	0.000641106	-0.00825763	-0.0274825	0.0356246	-0.0267651	0.0170507	0.0107685	-0.0249221	0.0291044	-0.0192821	-0.0158828	0.0256804	-0.0196818	0.028728	0.0276843
chr18_79193183_79277196:+	-0.0132931	0.0324584	-0.00863107	0.0229911	0.00151069	-0.00435585	-0.00721434	0.00150789	0.0247615	-0.0084522	0.00844386	-0.00515594	-0.0071293	0.0513951	0.0457694	-0.00815578	0.0474927	0.0529716	0.0484101	0.029673	0.0586258	-0.0124223	-0.00471249	0.0645421	0.00289732	-0.00168551	0.0258575	-0.0024388	0.0658992	-0.00485462	-0.00905448	0.0491187	0.0730183	0.0376961	0.0388578	0.0252466	0.0442754	0.0797986	0.0286605	0.0497914	0.0685113	0.0274892	0.00981086	0.0558143	0.0648101	0.0304888	0.0276047	0.027972	-0.012414
chr18_79193183_79307234:+	-0.0131612	-0.0105323	-0.0227507	0.0254901	-0.00880377	-0.0205868	0.00210397	-0.00652295	-0.00664161	-0.00231751	-0.0144876	-0.010273	0.00250325	0.0171617	0.0273676	0.00218561	-0.0226226	-0.0178836	0.00179527	-0.0220332	0.0433255	-0.00450452	0.0500004	-0.0101402	-0.00975559	-0.00769328	0.0155585	-0.0180155	0.00556976	-0.0131837	-0.0209995	-0.000173889	-0.0116611	0.0317139	-0.0183194	0.00220318	-0.00913469	-0.0163588	0.00573011	-0.000479654	0.0226077	-0.0205156	-0.00162762	0.0149351	0.0311556	-0.0133122	0.00569632	-0.0124033	-0.0172582
chr18_8718424_8720496:+	0.065066	-0.00166091	-0.915228	-0.394314	-0.472376	-0.147501	-0.516227	-0.298671	-0.511363	-0.420566	-0.509246	0.0224163	-0.240037	-0.275068	-0.129238	-0.211773	-0.266908	-0.50955	-0.520314	-0.128569	-0.0946216	0.0490074	-0.0690698	0.0162299	-0.0809845	-0.280331	-0.177031	-0.171398	0.21126	-0.172456	-0.262551	-0.222971	0.169581	0.141411	-0.278862	-0.0787364	-0.230794	-0.2897	-0.437309	-0.263592	-0.366202	-0.331434	-0.203521	-0.415345	-0.0634535	-0.228047	-0.0721899	-0.167324	-0.00946824
chr18_9182382_9221999:+	-0.0624257	0.00814152	-0.0753258	-0.0119746	-0.0122203	-0.0473453	0.035	0.0019465	0.0359316	0.0421395	-0.0250087	-0.0503432	0.0155095	0.0370591	-0.0383911	0.0202301	0.152705	-0.0196789	-0.00344361	-0.0518727	-0.0729962	0.153938	-0.0467717	-0.0347607	-0.0241193	0.0608182	0.0177927	0.00124431	0.160872	0.0323153	0.0565655	-0.0413614	-0.108084	0.0256991	-0.0188826	0.0671771	0.0789974	0.16811	0.0207646	0.0467596	-0.0563998	-0.0168704	-0.0176664	0.0622934	0.0703493	0.0475875	0.0106164	-0.0440637	-0.0340181
chr18_9204476_9221999:+	-0.101461	-0.0092663	-0.131897	-0.03767	-0.0376664	-0.0281221	-0.00303755	-0.0808766	-0.00696864	-0.0726208	-0.059868	0.010145	-0.092889	-0.0917395	-0.0111995	-0.0367148	0.000616297	-0.00356596	-0.0282344	-0.119714	0.00109376	-0.0488013	-0.0818374	-0.0840299	-0.0876916	-0.0542575	-0.042972	-0.0656598	0.0374334	-0.0255835	-0.0639874	-0.0341215	-0.0593257	-0.134857	-0.0452741	0.10809	-0.0124915	0.0559872	-0.0733073	-0.020533	-0.0386313	-0.115645	-0.0836397	0.0442312	0.00208208	0.00484984	-0.0364352	-0.0514129	-0.101536
chr18_9583117_9595102:-	-0.044244	-0.0595057	-0.0686206	-0.0152752	0.0200783	-0.0342033	-0.0553647	-0.0580186	-0.10792	0.0201116	-0.051764	-0.0143545	-0.00518943	-0.0528804	0.0384309	0.0353955	-0.065305	-0.116136	-0.110221	-0.0202654	-0.0601798	-0.0552625	-0.10015	-0.0684139	-0.0511284	-0.0387447	-0.0601323	0.0765997	-0.0501363	-0.0315968	-0.0571035	-0.0692895	-0.0718863	-0.0671955	-0.0268676	-0.00578898	0.0281629	-0.0360932	-0.0167086	-0.0463802	0.0109589	-0.0494224	0.00103686	-0.0500455	-0.0340745	-0.083851	0.031499	0.0225115	-0.0449956
chr18_9583117_9595153:-	-0.0463931	-0.0412585	-0.0877283	-0.0494554	-0.096861	-0.0883228	-0.0841299	-0.0729038	-0.0631448	-0.0697487	-0.072222	-0.0578412	-0.0542164	-0.0380833	-0.0808298	-0.0542283	-0.0652548	0.0115189	-0.0428128	-0.0572055	0.0140573	-0.0304553	0.00172164	-0.05491	-0.067741	-0.0635465	-0.0262067	0.00390079	-0.068862	-0.0459225	-0.083158	-0.02506	0.00565167	-0.0549618	-0.0636665	-0.0709004	-0.0928246	-0.0706769	-0.0891749	-0.054406	-0.0746212	-0.0759084	-0.0809083	-0.0272422	-0.0482661	-0.057387	-0.0789098	-0.039274	-0.0780821
chr19_12928342_12928847:-	0.0653007	0.0512526	0.000418392	0.00476596	0.0261538	0.0414032	0.03925	0.00528229	-0.0120123	0.0318461	0.0238967	0.00928581	0.0382547	0.00929429	0.00167558	0.0488002	-0.0275536	0.00395636	0.0268696	0.0353267	0.0739659	0.171431	0.0803194	0.04605	0.00222566	0.0224309	0.00767296	0.0370819	0.0639851	0.00764341	-0.00739982	0.079246	0.0252539	0.0355485	0.011065	0.0164291	0.0931782	0.0426295	0.0166734	0.029155	0.0298624	-0.00792061	0.019458	0.0308703	0.0254036	0.057472	-0.000251957	-0.000559304	-0.0219294
chr19_13332869_13334493:-	0.0251352	-0.0294064	-0.106749	-0.100186	-0.0592808	-0.0654952	-0.106977	-0.095528	-0.0977038	-0.0492157	-0.105498	-0.0345771	-0.0527803	-0.0610171	-0.0835892	-0.0722304	0.00487392	-0.0753171	-0.10575	-0.0876168	0.0403765	-0.0503842	0.00278064	0.0527981	-0.0338278	-0.0540753	-0.036855	-0.0507181	0.0291328	-0.0469136	-0.0397804	-0.079968	-0.0242385	-0.0231352	-0.0184857	-0.0635832	-0.0961688	-0.0449744	-0.096249	-0.0938911	-0.093833	-0.0941503	-0.0947852	-0.0968474	-0.0631442	-0.0608823	-0.0585881	0.00464421	-0.0812751
chr19_14458031_14458375:+	-0.0257385	-0.0203755	-0.0141455	-0.0355973	-0.00707559	-0.0178714	0.0138058	-0.00543193	0.0085812	-0.0225175	-0.029064	0.00144922	-0.00497494	-0.020454	-0.0249524	-0.0231838	-0.0203942	-0.0118818	-0.0279314	0.0720867	-0.0195979	-0.0256288	-0.0126464	-0.00757616	-0.00884868	-0.0111993	-0.00180714	-0.0336351	-0.0161446	-0.0210443	-0.0363477	-0.00344084	-0.0220052	0.00629452	-0.0202701	0.00910236	-0.0164162	-0.0192467	-0.0180412	-0.0177572	-0.0223238	-0.0042106	0.021641	-0.00766934	-0.0252124	-0.00727674	-0.0239186	-0.0203644	0.00745277
chr19_17276495_17276909:+	0.0282768	0.0524336	0.0151205	0.01584	0.00419937	0.0576018	-0.0014246	0.0170371	-0.00740736	0.0217179	-0.00688106	0.0477957	0.0331876	0.0536073	0.042289	0.0255347	0.0876314	0.0400195	-0.00509372	-0.00704735	0.0327489	0.0179547	0.0541773	0.0448923	0.0124739	0.0236561	0.0411003	0.04437	0.0421205	0.0207514	0.0258007	0.0542021	0.0475939	0.0238681	0.0315768	0.0509112	0.000444181	0.0120002	-0.00573235	0.0795799	0.0153913	-0.00208992	0.00309979	0.0326689	0.03943	0.0225725	0.00113212	0.0255929	0.0440938
chr19_18539371_18539720:-	-0.0202367	0.0105202	0.0770535	0.0771001	0.0560848	0.0752151	0.0396416	-0.0223786	-0.00141739	-0.0599693	0.0407695	0.0939798	0.0876351	0.0594632	-0.0255268	-0.0554774	0.0781656	0.107811	-0.00983249	-0.00330399	-0.0689869	0.141675	0.0793182	0.0480556	-0.0291492	0.0134875	0.0695453	0.0629121	0.10693	0.0241535	0.00158493	0.0683441	0.000114576	0.073374	0.0598338	0.104157	0.0403484	0.153789	-0.0575248	0.0633705	0.0911848	0.0216762	0.0792253	0.0888061	0.136026	0.0859693	0.00276423	0.0237677	-0.0146608
chr19_19245313_19248882:+	-0.0169174	-0.0173902	-0.0169789	-0.00647854	-0.0150645	-0.00344307	0.0098227	-0.00724817	-0.0211012	-0.00158665	-0.0190316	-0.015254	-0.0120699	0.00108668	-0.0182638	0.00295077	-0.0173589	0.0067639	-0.00460899	-0.0192712	-0.0174284	0.0532824	0.0085263	-0.0169821	-0.0159597	-0.0238838	-0.0154714	-0.00599091	-0.0159731	0.000306329	-0.0197236	-0.00784337	-0.0181524	-0.0163835	-0.0163805	0.0312922	0.00390946	-0.010755	0.00132819	-0.00970817	-0.013627	-0.0107171	-0.0163507	-0.0110289	0.00316703	-0.0042646	-0.0128646	-0.0129615	-0.0112126
chr19_40583398_40583717:+	-0.0112605	-0.00281621	-0.0281193	0.0153912	-0.00665968	-0.0483399	0.0301817	-0.0144206	0.00594583	-0.019534	0.0431516	0.0388283	0.0190184	-0.0312838	0.0320397	-0.0328222	0.00752208	0.000740199	0.0400867	0.000847617	0.105733	0.0131171	0.0666782	0.0360478	-0.0250953	-0.0348301	0.000536368	0.0613364	-0.0274604	-0.0300435	-0.00550321	0.00878451	0.00554106	-0.0230707	0.00399149	0.00314803	0.0165569	0.00256401	0.0781355	-0.0266223	0.101128	-0.0136907	-0.00999897	-0.0368857	0.0527245	0.0115095	-0.0226854	-0.0338797	0.0400812
chr19_40736986_40737769:+	0.0154978	-0.0205741	0.0684083	-0.0341855	-0.00792425	0.00069532	0.00500384	0.00153644	-0.0341932	0.04067	0.0120338	0.0114167	0.00504175	-0.0154447	-0.00800761	0.0132377	0.0235246	-0.0118396	-0.0227537	-0.000783105	0.00279518	0.024482	-0.00594716	0.0270513	0.0112749	-0.00260985	0.0273561	0.00633708	-0.00461065	-0.00272493	0.0188919	0.0312538	-0.000235959	-0.0219799	-0.000344483	-0.012798	-0.0117865	-0.0163343	-0.00169478	0.0273886	0.0150425	-0.0132184	-0.0148887	-0.00500859	-0.00588518	-0.0269935	0.0348844	0.0105803	-0.020459
chr19_47264603_47264946:+	0.0260898	0.00169408	-0.00098144	-0.0268307	-0.0113392	0.016167	-0.0202081	-0.0264705	-0.0104602	0.0583713	-0.039308	-0.0206947	-0.0131941	-0.00237795	-0.00883407	-0.0357314	0.0139263	-0.000363858	-0.0378749	-0.017651	0.042028	-0.00513624	-0.024769	-0.0234593	-0.00964411	-0.0303584	-0.0138032	-0.00591589	-0.0280536	0.0127229	-0.00743253	0.000774854	0.0185606	-0.0504056	-0.0312575	-0.0197176	0.00110435	-0.0178602	-0.00360096	-0.0195537	-0.0233125	-0.0285018	-0.0314796	0.0124189	0.0215366	-0.0216903	-0.00471662	0.00815736	-0.0465342
chr19_47362476_47362693:+	0.00757068	0.0162668	0.0134576	0.00701893	0.019149	0.0181204	0.0554969	0.0100562	0.0135884	0.0328403	0.00737721	0.0289799	0.0183642	0.0726994	0.00298324	-0.00683314	0.0128712	-0.00842029	0.0206121	0.0320483	-0.00661692	0.00264519	0.0530761	0.0195958	0.00751116	0.00214592	0.0209643	0.020557	0.0128539	-0.0042734	0.00838906	0.00486402	0.00982284	0.00866907	-0.00376345	0.00633359	0.0112612	0.00568207	-0.00294763	0.0384471	-0.00471089	0.0361485	0.028527	0.0477365	0.0196334	0.00973215	0.0173838	0.0154128	0.0199634
chr19_47416652_47417350:-	-0.147673	-0.198745	-0.140208	-0.210762	-0.0981098	-0.195987	-0.101041	-0.155673	-0.121729	0.00530744	-0.0655625	-0.035093	-0.0880536	-0.00748981	-0.139119	-0.126605	-0.0283026	-0.305069	-0.131982	-0.129493	-0.0739138	-0.139013	-0.242636	-0.063716	-0.169807	-0.164793	-0.0564938	-0.159105	-0.128467	-0.136128	-0.110822	-0.166453	-0.347896	-0.199836	-0.0946552	-0.0496947	-0.125111	0.032006	-0.193588	-0.0926683	-0.0945035	-0.157755	-0.140263	-0.0923182	0.0350285	-0.172859	-0.107037	-0.128088	-0.157957
chr19_48633444_48633655:-	-0.00029743	-0.038053	-0.0333116	0.000472829	0.00124807	-0.0115013	0.0034837	-0.00980432	-0.0166639	-0.040208	-0.0181489	0.0352635	-0.00790072	0.0098286	0.00285725	-0.0429877	0.0114656	-0.00462449	-0.00497996	-0.0288117	-0.0261387	-0.00392888	-0.0144741	0.00946138	-0.0251746	-0.025684	0.0356208	-0.0144547	0.0143423	0.00614029	0.0220746	-0.0254632	0.0152172	-0.0209909	0.0193743	0.000427836	-0.0183723	-0.0244853	-0.0069999	-0.0188379	-0.00842457	-0.0308549	-0.0374297	-0.0162145	-0.00022915	-0.0149203	-0.0126429	-0.000798025	-0.0247492
chr19_52076044_52089002:-	-0.002588	0.000457727	0.0236213	0.0588091	0.00465359	0.0245	-0.000236644	0.00355347	0.00551367	0.0599174	0.0400329	0.010109	0.0380112	0.00047706	-0.000259449	0.000458742	0.0146638	0.0387879	0.000956479	0.00200108	0.0283079	-0.00268015	0.0325482	0.0404235	0.0103713	0.0136541	0.0498506	-0.00136927	0.001712	0.0401401	-0.00407109	0.0418702	0.0275924	-0.00261206	-5.63e-06	0.0649276	0.015128	0.00890162	0.00690104	0.00160692	0.0378788	0.00444176	0.0244528	0.0212199	0.0508311	0.0194285	0.0410835	0.0256254	0.00775506
chr19_5604583_5604936:-	0.0211832	0.0973456	0.0637873	0.0646723	0.105983	0.0297095	0.133095	0.0495428	0.0466646	0.0274915	0.0799489	0.111493	0.0465148	0.0764908	0.0582623	0.0840838	0.211004	0.112074	0.139349	0.0935973	0.0323928	0.100766	0.120661	0.0654681	0.0372942	0.0302758	0.053902	0.0190086	0.132264	0.0278803	0.10449	0.0940944	0.0324598	0.108534	0.0275812	0.0968899	0.0431022	0.0998117	0.106526	0.0416915	-0.00241363	0.0609161	0.00840455	0.0613916	0.0452429	0.102997	0.102289	0.0954998	0.0829272
chr19_8455405_8463686:+	0.040325	0.0204264	0.0138254	0.00640132	0.0102377	0.0271606	0.0169187	-0.00136535	-0.0170413	-0.00188524	-0.000712145	0.0144562	0.0164081	0.0309871	-0.0127706	0.0103111	0.0779254	0.0932576	-0.01932	0.103814	0.0120244	0.0362388	-0.0238404	0.0298746	-0.0178229	-0.013202	0.0221915	0.0522264	0.0616575	0.00308659	0.0123868	0.0292114	-0.0156398	0.0116066	0.0043352	0.067298	0.0387663	0.065245	0.0552181	-0.0198758	0.0695108	0.0116523	0.0316665	-0.0181049	0.0425379	0.0366574	0.00353284	-0.0169089	-0.00775384
chr2_106122970_106166083:-	-0.00811554	-0.00835401	-0.00280162	0.0185824	-0.00900732	-0.00266021	-0.0102917	-0.0104373	0.0115674	0.00921703	0.0052923	0.0227679	-0.0107479	0.0282341	-0.0117147	-0.0112428	0.00898665	0.00422153	0.00438175	-0.00849676	-0.0109746	0.00936382	0.029522	0.0113344	0.0021641	-0.0122169	0.0142566	-0.00880504	0.0154384	-0.0093796	-0.00945464	0.0356836	-0.00771147	0.0189533	-0.00960603	-0.00582486	-0.00790773	-0.00601599	0.0306913	-0.00722103	-0.00838773	-0.00903845	0.0243597	-0.0071747	-0.00733015	0.0177679	-0.00458884	0.00285338	-0.00658664
chr2_106158058_106166083:-	-0.135765	-0.0904809	-0.12319	-0.0810057	-0.037112	-0.0934896	-0.0944086	-0.112364	-0.0116282	-0.0557034	-0.00345231	-0.0959101	-0.0503675	-0.00850878	-0.101782	-0.03644	-0.0107016	-0.0945724	-0.0427516	-0.0308334	-0.0880914	-0.0221932	-0.111769	-0.105406	-0.0367627	-0.0901786	-0.0751376	-0.0145147	-0.0962844	-0.0866066	-0.0440927	-0.0590148	-0.0999437	-0.100666	-0.0911864	-0.104211	-0.0890788	-0.0780889	-0.0688284	-0.113229	-0.0500382	-0.131251	-0.106569	-0.0634715	-0.0447832	-0.104451	-0.0218742	-0.0703408	-0.0708955
chr2_10644320_10668723:-	-0.0148464	-0.010914	-0.0100294	0.0420167	0.0149455	0.011571	0.00730027	-0.00275301	0.037239	0.0490955	0.0155236	-0.00997943	0.0119419	0.0692973	-0.0131943	0.0124536	0.0471766	0.0299025	-0.0144883	-0.0157345	0.023943	0.010875	0.0129803	-0.0102316	0.00415484	0.0129296	0.0473529	0.00332815	0.0149993	0.0256595	0.00174898	-0.00978517	-0.00802954	-0.00412776	0.0242711	-0.0109437	0.01615	0.0552103	-0.00071531	0.0469424	0.00224214	-0.0121164	-0.00760046	0.00672942	0.0163332	0.025192	0.0201307	-0.00682529	0.00932544
chr2_106830066_106834146:-	0.0234973	-0.0673969	-0.0205271	0.0009792	-0.0370663	-0.0413084	-0.000425435	-0.0325263	-0.0404471	-0.0669048	0.00257142	-0.0522615	0.00051082	-0.0443631	-0.0310383	-0.0694798	0.0227737	0.176593	0.0107253	0.017194	-0.0525038	-0.0113008	0.00226274	-0.0237295	-0.00487521	0.00581611	-0.0444221	0.0958331	-0.00917047	-0.077239	0.0186478	-0.0466548	-0.0896009	-0.0704958	-0.025388	-0.0236144	0.0603142	0.13309	-0.0381487	0.0143678	-0.0684677	0.00459541	-0.0271876	0.0557646	0.0500024	-0.0517457	0.0606611	-0.0265464	-0.0691369
chr2_106830066_106844034:-	-0.108068	-0.154393	-0.132601	-0.0428914	-0.0969995	-0.118456	-0.0849318	-0.109088	-0.155089	-0.0863432	-0.149358	-0.076297	-0.103403	-0.0425771	-0.0531582	0.0276316	-0.0510703	-0.123096	-0.148752	-0.105539	-0.0892559	-0.0222296	-0.0483059	-0.134706	-0.167695	-0.168861	-0.106076	-0.134905	-0.0310826	-0.101585	-0.10249	-0.1095	-0.129361	-0.212374	0.0138905	-0.174233	0.00399492	0.0136129	-0.163343	-0.211778	-0.0934414	-0.172231	-0.118485	-0.078743	-0.039061	-0.191645	-0.0877218	-0.14792	-0.146812
chr2_108771701_108773046:+	-0.0261951	0.00567834	-0.0305891	-0.0402813	-0.00835165	-0.0160329	-0.0246295	-0.0290214	-0.0133831	-0.0274725	-0.010493	-0.0118932	-0.00782652	0.00812589	-0.02473	-0.0023009	0.00793538	-0.0269085	-0.0200926	-0.0250658	0.0212698	-0.00439094	-0.0308763	0.00394078	-0.0180136	-0.029104	-0.0164104	-0.0142387	-0.0247197	0.0120217	-0.0288922	0.0247468	-0.0184728	0.00865793	-0.0256223	-0.0260598	0.00540652	0.0271173	-0.00220164	-0.0253739	-0.0235423	-0.0250468	0.000681191	-0.00255849	-0.00178728	-0.0229617	-0.00986073	-0.00304373	-0.0186354
chr2_112299849_112300029:+	-0.400047	-0.318065	-0.348097	-0.170389	-0.278823	-0.391799	-0.273413	-0.265472	-0.143437	-0.380154	-0.234544	-0.205287	-0.271079	-0.223832	-0.404518	-0.23175	-0.0439313	-0.0606782	-0.297678	-0.346971	-0.338512	-0.000783552	-0.282605	-0.137946	-0.206866	-0.339403	-0.161925	0.0298194	-0.139676	-0.337563	-0.0985797	-0.243734	-0.297555	-0.222918	-0.257577	-0.217202	-0.291615	0.00951495	-0.269845	-0.255335	-0.314274	-0.351199	-0.286859	-0.14795	-0.18664	-0.194735	-0.17	-0.191379	-0.29899
chr2_112299849_112325197:+	-0.03293	0.00925307	-0.0189679	-0.0282775	-0.0254803	-0.0229564	-0.0380605	-0.0110361	0.000743787	-0.0366411	-0.0355973	-0.00803605	-0.0327452	0.0249319	-0.0340318	-0.00549906	-0.0132513	-0.00669992	-0.00205691	-0.0229	-0.0270203	-0.014084	-0.0236607	-0.0233133	-0.0331378	-0.0187851	-0.00117195	-0.0078996	-0.0232254	-0.0274583	-0.0284503	-0.00850869	-0.0268796	0.0213625	-0.029349	-0.0148169	-0.00458744	-0.00938886	-0.0200541	-0.0327852	-0.0352695	-0.0241436	-0.0252513	-0.0357641	-0.0115453	-0.0200581	-0.0325766	-0.00497452	0.0184339
chr2_119926598_119945240:+	-0.00461301	-0.0665062	-0.032635	-0.0558457	-0.0576891	-0.0689462	-0.074743	-0.0757816	-0.0904636	-0.0122486	-0.0758053	-0.0644495	-0.0534038	-0.0536376	-0.0523971	-0.0638064	-0.0703508	-0.0915064	-0.0610786	-0.0561586	-0.0651441	-0.0504213	-0.0462691	-0.0682236	-0.086556	-0.0800384	-0.0514677	-0.0590459	-0.0423013	-0.0572997	-0.0750584	-0.0390698	-0.0874992	-0.0659178	-0.0792068	-0.0373033	-0.0723946	0.0358794	-0.0613312	-0.0748326	-0.0320983	-0.0715165	-0.0336526	0.0143903	-0.0338527	-0.0532155	-0.0436368	-0.0770373	-0.0755246
chr2_121605701_121606180:-	-0.0200151	-0.0153482	-0.0355894	-0.046099	-0.0311769	0.00326024	-0.0313531	-0.0280246	-0.0212366	-0.00605244	-0.0399907	0.00623288	-0.016655	-0.00225992	0.0366945	-0.0132621	-0.0197188	-0.0326987	-0.00895226	-0.0363908	0.0802888	-0.00418593	0.0608691	-0.0087809	0.00637996	-0.0284171	-0.018057	-0.0335326	0.0098	0.0124163	-0.0407656	0.0128195	0.0182253	-0.0187194	0.00121996	0.00111507	-0.00817106	-0.0246358	-0.0264246	-0.0150231	-0.0412435	-0.0363053	-0.031685	0.00257216	-0.0246006	-0.0132125	-0.00322939	0.00123743	0.0489504
chr2_124221705_124242393:+	-0.0403067	-0.016706	-0.0445687	-0.0163993	-0.0443347	-0.0363921	-0.0243612	-0.0458719	-0.0448019	0.0115396	-0.0404661	-0.000976709	-0.0302803	-0.0145804	-0.0486792	-0.0647643	-0.00677106	-0.0156883	-0.0463432	-0.014321	-0.00984754	0.0335755	0.016286	-0.0328965	-0.069143	-0.0512546	0.00553572	0.0633249	-0.0269641	-0.0241522	-0.036014	0.014596	-0.0423768	-0.0397695	-0.0636576	-0.0338326	-0.0426932	-0.019999	-0.0312895	-0.0480616	-0.0239268	-0.0347285	-0.0539429	-0.0384363	-0.0839676	-0.038404	0.0108732	-0.0243124	-0.0711539
chr2_124772799_124798320:+	-0.00594412	-0.0074107	-0.00858732	-0.00740239	-0.00450693	0.00710292	0.00273035	-0.00450573	0.0115023	-0.0164219	0.0048305	0.00140292	0.00411403	0.0217458	-0.0161339	0.0079123	0.0253802	0.00207877	0.0155684	-0.0028186	0.0567117	-0.0114516	0.00349972	-0.0135543	-0.001306	-0.018281	-0.00729778	0.0245418	-0.0144053	-0.0110597	-0.00249415	0.00254159	0.0160943	0.0420085	-0.0130821	0.00665189	0.00334176	0.0305326	-0.00183669	-0.0099833	-0.0109041	-0.000518452	0.0102424	-0.00896965	0.00276566	-0.0146867	-0.00561827	0.00357036	0.00709796
chr2_135602500_135605016:+	0.0171045	0.036775	-0.0172813	0.0310516	-0.00547057	-0.00208268	-0.000290163	-0.0249906	-0.00634042	-0.0169318	-0.0161745	-0.0162078	-0.00724071	0.0183253	0.00079826	0.0061084	0.0377925	-0.0163525	0.0213136	-0.0108737	0.0172151	0.0070217	0.0226215	-0.0201055	-0.0212558	-0.00436315	-0.00639822	-0.0173397	0.0391619	-0.0183205	-0.0101861	-0.00356215	-0.0356853	-0.00997027	-0.0060896	-0.0259	-0.0114569	0.0190225	0.0107372	-0.0117111	-0.00669111	0.0107808	0.00172046	-0.00632248	0.0129405	-0.0148805	-0.00845689	0.00485395	-0.0372194
chr2_135638739_135639122:+	-0.0223941	-0.0177008	-0.00817164	-0.0141276	-0.0166914	-0.0153051	0.00272827	-0.0156933	-0.0212187	0.023756	-0.00702225	0.00204385	0.0202137	0.00559614	-0.0191336	-0.0172136	-0.0114667	0.0844833	0.011044	-0.00937107	-0.0120734	0.00384376	0.0535045	-0.0100769	-0.00644464	-0.00663545	0.054396	-0.0135415	-0.0207557	-0.0183317	0.0383665	-0.0162367	-0.0211149	-0.0163126	-0.0156704	0.0337298	-6.56e-05	0.0211909	0.0192938	0.00428667	-0.0169536	0.0181535	-0.0189069	-0.0056824	0.0431294	-0.0195338	-0.0124207	0.00374971	-0.00475612
chr2_135675332_135680324:+	-0.170197	-0.0759193	-0.130277	-0.071738	-0.115827	-0.0225477	-0.107958	-0.127748	-0.10386	-0.115173	-0.130217	-0.0436853	-0.0991946	0.125318	-0.0866264	-0.00789677	-0.0718484	0.0223238	-0.0281642	-0.0739112	0.095956	0.107816	0.0261395	-0.100347	-0.0859982	-0.114328	-0.00329967	-0.0151544	-0.0137966	-0.0230611	-0.125745	-0.0959287	-0.0429962	-0.160406	-0.115559	-0.134211	-0.0721933	0.170277	-0.0733668	-0.0929255	-0.0802498	-0.12979	-0.101754	-0.0576892	0.0038694	-0.100808	-0.0709199	-0.0203726	-0.16503
chr2_135709433_135710231:+	-0.0408262	-0.0262694	-0.0354219	-0.0102541	-0.0289698	-0.0366135	-0.0466491	-0.0435999	-0.0213184	-0.0440127	-0.0265161	-0.0268745	-0.0231868	-0.00173043	-0.0358343	-0.0392325	-0.0197247	-0.0291336	-0.0292838	-0.034205	0.0284448	-0.00140563	-0.0270967	-0.0107676	-0.0258292	-0.0166672	-0.026782	-0.027288	-0.0294528	-0.0325691	-0.0365831	-0.0285951	-0.0347348	-0.0407488	-0.020311	-0.0353899	-0.0349525	0.00829787	-0.0255777	-0.035119	0.00446189	-0.0246574	-0.0270524	-0.0191208	-0.0168462	-0.0385419	-0.0216635	-0.0255765	-0.0370306
chr2_135748267_135772547:+	-0.018702	-0.0177767	-0.00747623	-0.00968914	0.0037921	-0.0105679	0.00708231	-0.00505879	-0.00739786	0.0144298	0.00131922	0.0135009	0.0111738	-0.00362504	-0.0105326	-0.00836569	0.0510056	-0.00805771	0.0404043	0.00898689	0.0487651	-0.0102528	0.0353918	-0.0106943	0.0392089	0.0233495	-0.00884375	0.0392697	-0.0185743	0.0275851	-0.0131269	0.0199256	0.00820763	-0.0119021	-0.00664982	0.0286932	0.04348	0.0389064	-0.0015309	-0.00183926	0.0160459	0.0240262	0.0195032	0.00643665	0.00552303	-0.00616089	-0.00988733	0.0274703	-0.0154624
chr2_147896301_147899898:+	-0.0934599	-0.156596	-0.173701	-0.086746	-0.106316	-0.149663	-0.145568	-0.129263	-0.161895	-0.229663	-0.128906	-0.130129	-0.0986119	-0.00473578	-0.196103	-0.122257	-0.0554552	-0.0147916	-0.189121	-0.0677317	0.0312618	-0.134734	0.00274998	-0.0514821	-0.0953608	-0.202303	-0.00443309	0.0117464	-0.159275	-0.108066	-0.131175	-0.101509	0.00589466	-0.0307692	-0.114973	-0.101367	-0.0980973	-0.153292	-0.173969	-0.0162607	-0.11239	-0.195203	-0.0914819	-0.124298	-0.121469	-0.146615	-0.0834173	-0.104219	-0.093565
chr2_15488894_15511350:-	-0.0122098	-0.00659943	-0.00320447	-0.00525258	0.00309957	0.018104	-0.00457752	0.0128743	0.00698009	-0.00398026	0.00711239	0.0125119	0.0192748	-0.00232074	-0.00358058	-0.00143071	0.0356457	-0.00523741	0.0447438	0.0350867	-0.00317892	0.0150138	0.00462975	-0.00316554	-0.00180617	0.00515847	0.0114595	0.068489	-0.00591924	-0.00512602	-0.00298699	0.00565317	0.0177589	-0.0062558	-0.00231633	0.0489463	0.038824	0.0145843	-0.00556922	0.0144906	-0.00879394	0.00762381	0.00506572	0.0259868	0.0356729	-0.000681883	-0.00490799	0.0135177	-0.013067
chr2_15553426_15558634:-	-0.0478938	-0.058032	-0.0478916	-0.0502179	-0.0524031	-0.0524437	-0.0467981	-0.0436364	-0.0437412	-0.04591	-0.0573192	-0.0571764	-0.0418524	-0.0255191	-0.0584642	-0.0595337	-0.0557352	-0.0423943	-0.043153	-0.0352159	-0.0652592	-0.0237532	-0.0159351	-0.0485284	-0.0280907	-0.0592291	-0.0308913	-0.0385663	-0.0248246	-0.0352166	-0.0426174	-0.0368678	-0.0513148	-0.0487873	-0.0532054	-0.0381116	-0.0333637	-0.00841936	-0.0575379	-0.0529944	-0.0526003	-0.0523061	-0.0608675	-0.0435747	-0.0562176	-0.0549277	-0.032954	-0.0502112	-0.0533182
chr2_159337462_159395834:-	0.0113122	0.0485751	-0.00560658	-0.0264603	-0.0549894	0.0349648	-0.0413648	-0.0435136	-0.0299591	0.0194038	-0.0510884	-0.0041699	-0.0642856	0.13909	0.0603024	0.0190915	-0.068797	-0.0394656	-0.0412593	-0.0420222	0.0640929	-0.0254893	0.024208	0.0214675	0.0632589	-0.0272801	0.0179131	-0.057323	0.0205926	-0.00129508	-0.0385009	-0.0266724	0.0906007	0.0697183	0.0913754	-0.0349753	-0.0533726	-0.047486	0.000364442	-0.0547304	0.0290137	-0.0311184	0.0282707	-0.0124806	-0.000764951	0.0220758	-0.0145372	0.0323882	-0.0353056
chr2_161872293_161901011:+	0.0156263	0.0120776	0.0206783	0.0354934	0.0133551	0.0490654	0.021069	0.0109921	0.0592984	0.00727209	0.0247832	0.0308851	0.00541605	0.000854911	0.0373933	0.0035966	0.00496263	0.0287489	0.0191726	0.0264267	-0.000367498	0.0068464	0.0092239	0.0166616	0.0157233	0.0164137	0.0186041	0.0245546	-0.000320018	-0.00101057	0.027338	0.00302221	0.021959	0.0612293	0.00458312	0.0139838	0.00687214	0.0040533	0.0178955	0.00410585	0.0235445	0.00479304	0.00730304	-0.00292561	-0.00517889	0.0323281	0.0292871	0.0219695	0.00837461
chr2_161947566_161965173:+	-0.0278849	-0.0385869	-0.0305931	0.0356918	-0.0318664	-0.0207278	-0.0274702	-0.0252266	-0.00692041	-0.0616961	-0.043865	-0.0232491	-0.0329691	-0.0240674	-0.037861	-0.0319097	0.0201112	0.0104182	-0.0439879	-0.0230389	-0.0487669	-0.02309	-0.0187447	-0.0373873	-0.0450277	-0.0343193	-0.0442169	-0.0138084	-0.0348648	-0.0254717	-0.0257311	-0.0220733	-0.0182721	-0.042933	-0.0429804	0.0462438	-0.0507869	0.0253138	-0.0417561	0.0303134	-0.0358941	-0.0514613	-0.0124666	-0.0168089	-0.0252411	-0.0443274	-0.0209887	-0.0412413	-0.0368527
chr2_162504443_162518158:-	-0.0347158	-0.0144503	-0.038345	-0.0199162	-0.0231378	-0.0294017	-0.0445464	-0.0342074	-0.0470258	-0.06345	-0.0444473	-0.0426962	-0.0430829	-0.0463769	0.0094581	-0.0557868	-0.00522801	-0.00426748	-0.0312783	-0.0228943	0.0287819	-0.0389646	-0.0157797	-0.0354531	-0.0153089	-0.0198492	-0.0292723	-0.0418872	-0.0264131	-0.0250519	-0.0214595	-0.021247	0.0177758	-0.0472896	-0.0310399	-0.0445261	-0.0300317	0.0349729	-0.0366532	0.0182202	0.033886	-0.0421358	-0.0254056	-0.0347844	-0.00137211	-0.00091807	-0.00988558	-0.0323831	-0.0358269
chr2_168063500_168075231:-	-0.0121412	0.0219791	-0.0019531	-0.0054893	-0.0195465	0.00522135	-0.00809287	-0.0117158	0.0336825	-0.00293629	-0.0194428	-0.000910869	0.0205619	0.0561305	0.00386332	0.00584521	-0.0204248	-0.00905047	-0.0199119	0.0420805	0.0151296	0.0030571	-0.00995184	0.0156854	0.00795325	-0.0121704	-0.000988292	-0.0181627	-0.0133413	-0.0187041	-0.0143923	-0.0022708	-0.0134868	0.0112163	0.0269454	0.0218065	-0.00521799	-0.0189727	-0.00889389	-0.0180537	-0.0203786	0.0192062	0.024961	0.00494248	0.0315232	-0.00625852	-0.0121878	0.0152421	0.00426606
chr2_168063500_168129758:-	-0.306454	-0.450937	-0.474699	-0.46354	-0.341347	-0.275315	-0.433544	-0.390274	-0.427744	-0.0642558	-0.346195	-0.382342	-0.438994	0.171525	-0.440034	-0.131	-0.0060704	-0.00280537	0.10355	-0.443779	-0.146677	-0.224	-0.460496	-0.115621	-0.165568	-0.306519	-0.408202	-0.153726	-0.0824359	-0.251581	-0.182812	-0.279328	-0.178991	-0.00606466	-0.44269	-0.49278	-0.430341	-0.253452	-0.201359	-0.392068	-0.199438	-0.283998	-0.476158	-0.46534	-0.226136	-0.303603	-0.19927	-0.392229	-0.298508
chr2_168138088_168182090:-	-0.0202099	-0.00904385	-0.0327151	-0.0414091	-0.011762	-0.017254	-0.0176496	-0.0285481	-0.0376814	-0.00429246	-0.0363331	-0.0249982	-0.0240858	-0.0341595	-0.0260293	-0.0161016	-0.0327365	-0.0426131	-0.0345101	-0.0195048	0.0345737	-0.0219591	0.0265164	-0.0196519	-0.0272255	-0.0230801	-0.00863952	-0.0298535	-0.0114662	-0.0332655	-0.0209649	-0.0111525	-0.0186924	-0.0187899	-0.0275813	-0.0190646	-0.0307225	-0.0199963	-0.0175909	-0.0280442	-0.0172494	-0.0286106	-0.0418992	-0.0198087	-0.0107693	-0.0293623	-0.0251497	-0.0273702	-0.0101336
chr2_168161787_168182090:-	-0.0333357	-0.0324837	-0.0338088	-0.00107404	-0.0285713	-0.0323265	-0.0312374	-0.0251691	-0.030793	0.0251967	-0.0175901	-0.0346159	-0.0208153	-0.028055	-0.0302919	-0.00782763	0.00503707	0.0106335	-0.0351006	0.0372028	-0.0366846	-0.0336106	-0.0351436	-0.0184034	0.00220704	-0.0297953	-0.0189317	-0.0314035	0.0179405	-0.0121752	-0.0350082	-0.009208	-0.0309451	-0.00836755	-0.0296035	0.00863488	-0.0325144	-0.0227402	-0.0128948	0.0112788	-0.0125794	-0.0271834	0.0317861	-0.0318846	-0.0286175	-0.0295669	-0.0224495	-0.0382964	-0.0011492
chr2_168691034_168717978:+	-0.0376303	-0.0161506	-0.0247028	-0.0323215	-0.0202701	0.0199989	-0.0229911	-0.0269587	-0.00116613	0.0505216	-0.0418794	0.00697439	0.0400172	0.0367002	-0.0497186	-0.0493387	0.0931953	0.0174929	0.00574647	-0.0233033	0.0037075	0.00399819	-0.00529006	-0.0493674	-0.0302628	-0.00853232	-0.010328	0.00646359	-0.0522574	-0.00325735	-0.0327881	0.0134847	-0.0451667	0.0153899	-0.0470587	-0.00792155	0.0168539	0.110245	-0.00161439	0.0460683	-0.0572062	-0.0329166	-0.0438722	0.0112946	-0.0466381	-0.0319354	-0.00807399	-0.0184846	0.0134053
chr2_170015281_170061443:+	-0.0614756	-0.036907	-0.04117	-0.0336358	-0.0522914	-0.0293071	-0.034179	-0.0535815	-0.0170725	-0.00798537	-0.021193	-0.00994862	-0.0549688	0.0105011	-0.0346935	-0.0267441	0.0201011	-0.0423121	-0.0572263	0.00643655	-0.057019	0.020631	-0.0459549	-0.0411852	-0.0581948	-0.02641	-0.0397242	-0.018031	-0.025912	-0.0303815	-0.0445238	-0.0500873	-0.0377514	-0.0414829	-0.0335633	-0.0500627	-0.0115369	-0.0552082	-0.0416046	0.0049943	-0.0269154	-0.0419254	-0.0499285	-0.0226047	-0.008168	-0.0457764	-0.0304122	-0.0336283	-0.0277911
chr2_171028339_171046362:-	0.0171095	-0.0405023	-0.0601816	-0.049268	-0.0365551	-0.0241142	-0.018096	-0.0395663	-0.02499	-0.0594934	-0.0553683	-0.0280097	-0.0273806	-0.0135847	-0.0672861	-0.0323122	0.00620227	0.0167128	-0.0484662	-0.0571671	-0.0499999	-0.0248113	0.0116856	-0.0561427	-0.0333934	-0.00214592	-0.0278983	-0.0530897	0.0419281	-0.036221	-0.0698196	-0.049454	-0.0373537	-0.0687941	-0.0446334	-0.0223589	-0.0483219	-0.0263193	-0.0717465	0.0164077	-0.0358779	-0.0420433	-0.0642981	-0.0410205	-0.0322465	-0.0295805	-0.0383747	-0.0250034	-0.0818345
chr2_171448681_171476950:+	-0.0534968	-0.0252124	-0.04442	-0.00517489	-0.0550458	-0.0276858	-0.0569981	-0.034822	-0.0104576	-0.0516548	-0.00994275	-0.00370869	-0.0251902	-0.00503488	-0.0158049	-0.0234132	-0.00828272	0.0165485	-0.019702	-0.0421805	-0.0433375	-0.0389364	-0.0186008	-0.0217764	-0.0367163	-0.0558875	-0.0450921	0.0113328	-0.0499993	-0.0497336	-0.0406206	-0.0293468	-0.0783835	-0.0124866	-0.041334	-0.0562442	-0.0254815	-0.0591947	-0.0465824	-0.0205972	-0.0121413	-0.0434692	-0.0453907	-0.0149799	-0.0245891	0.00275981	-0.0427391	-0.0381895	-0.0729356
chr2_179950512_179950926:-	-0.0617078	-0.0262279	-0.0288339	-0.0315605	-0.00289482	-0.0303888	-0.0235288	-0.0251973	-0.0312487	0.0746239	-0.0139697	-0.0239432	-0.0139026	-0.000628153	-0.0396305	-0.0426619	-0.0200979	-0.0333967	-0.0121121	-0.0422522	-0.0178184	-0.0460407	0.00919298	-0.0303229	-0.0187697	-0.0122743	0.00384577	-0.0110923	-0.0172611	0.00400867	-0.0272388	-0.00734934	-0.0593721	-0.00678154	-0.0330752	-0.0137115	-0.0174452	-0.0181548	-0.00755175	-0.0301462	-0.017567	-0.0335375	-0.0149522	-0.0305324	0.0318094	-0.0271355	-0.0122353	-0.0337228	0.0132827
chr2_189791790_189818180:+	-0.0270066	-0.0299925	-0.0270514	-0.0138214	-0.00281943	-0.0203784	-0.0322756	-0.0448115	0.0177176	0.0146648	0.0770218	-0.0376975	-0.0111612	0.0178059	-0.0220789	0.000393855	0.0303469	-0.0280722	-0.0236573	-0.0192881	-0.020649	0.00974138	-0.0451049	-0.0537575	-0.0037879	-0.0345041	0.0175706	0.0783116	0.0644994	-0.0298655	-0.0224695	-0.000629347	0.0126134	-0.0292884	-0.0384689	0.0806024	0.0193834	-0.0270902	-0.0409006	0.01179	-0.0453247	-0.00650512	0.0303543	-0.00994654	-0.0186844	-0.0147355	-0.0290789	0.0219334	-0.000779156
chr2_190659158_190673152:+	-0.0532007	-0.0289601	-0.0537173	-0.00888031	-0.0366472	-0.0437159	-0.0350203	-0.00746392	-0.0338435	-0.0280441	-0.0109465	0.00814361	-0.0240168	-0.0247663	0.0346374	0.0167483	0.028668	0.0096279	-0.0208452	-0.0224865	-0.0444451	0.0342415	-0.0300052	-0.0726714	-0.0031805	-0.0271902	0.0145396	-0.0389689	0.00689814	-0.0345933	-0.0220645	-0.0515245	-0.00822106	0.00961865	-0.0303095	-0.0267991	-0.0028168	0.0609208	-0.0183283	-0.0252787	-0.0464771	-0.00515482	-0.0342007	0.0340029	-0.0295066	-0.00635699	-0.0342526	-0.00108703	-0.0325974
chr2_190900564_190924593:+	0.075772	-0.0101161	0.0298367	0.00861253	0.00779797	0.0201451	-0.0236228	-0.00804091	0.0141121	-0.0149084	0.0179646	0.010412	0.0150612	0.0277956	0.00354704	-0.0283167	-0.0196183	0.0640805	-0.00505013	-0.0134051	0.0491367	-0.0203866	-0.00565766	0.0735014	-0.00210868	0.0113357	-0.0154884	0.0910962	-0.0331519	0.0264183	-0.0250627	0.0283708	0.0208632	0.0418186	-0.0328257	-0.0551466	0.0264719	0.0779906	-0.0204295	-0.0308733	-0.00661793	-0.0209016	-0.0238324	-0.0208334	0.0778494	0.0169482	0.0258516	-0.0160643	-0.0154965
chr2_190900564_190931637:+	0.0130508	0.0366783	0.0421122	-0.0250315	0.00962408	0.0154579	-0.00108785	-0.0120026	-0.0235777	-0.0250229	-0.00878165	-0.00229397	-0.00355763	0.0319004	-0.0225713	-0.0152403	0.0488783	-0.0274812	-0.0212332	-0.0180541	0.00628951	0.00352924	0.00101809	0.0289436	0.0047522	0.0368061	0.00782491	-0.0110182	0.0189314	0.0301832	-0.0229759	-0.0121173	0.000822567	-0.0134063	-0.0184631	-0.0171878	-0.00180833	-0.0211334	-0.0320077	-0.0100471	-0.028678	-0.0300797	0.0185209	-0.000947125	-0.0148054	-0.00590926	-0.00928799	-0.0277146	0.00419729
chr2_1922292_1923263:-	0.0197298	0.0445342	0.0299125	0.069618	0.0128224	0.0209612	0.0416915	0.0123684	0.0114313	0.00774434	0.0419369	0.0120079	0.00995976	0.0102246	0.0202831	0.0543738	0.123924	0.100273	0.0159028	0.00952056	0.012959	0.013594	0.0168141	0.0564415	0.0471783	0.0362215	0.0516252	0.0508672	0.0227711	0.106741	0.0113877	0.0104931	0.042052	0.0702953	0.0112408	0.00664609	0.00426557	0.00527487	0.0692366	0.0883259	0.0633655	0.00433378	0.0219895	0.00770522	0.0343378	-0.00907714	0.0336593	0.0662475	0.0905712
chr2_195680032_195728349:+	-0.0116427	-0.0182762	-0.00803821	0.047709	0.00955534	-0.0128714	-0.012462	-0.00235049	-0.00627368	-0.0132712	0.0192014	-0.0100877	-0.00481531	-0.00553225	0.0308001	-0.0144745	-0.0251353	0.00659363	-0.0153811	-0.00268794	0.0588148	-0.00583882	0.00131681	-0.00445747	-0.000847362	-0.0162733	0.00363139	-0.00495076	0.0451901	-0.0197219	-0.00222803	-0.00850598	0.0587623	0.0253445	0.0404817	-0.00714984	-0.00558352	0.0296175	-0.0066432	0.000954901	-0.0101548	-0.0164446	0.00170183	0.00975139	-0.000537071	0.0204647	-0.000171911	-0.0131479	-0.0200847
chr2_196912882_196920150:-	-0.0408339	-0.0292473	-0.0326137	-0.0137535	0.00428409	-0.0242065	-0.0271159	-0.0231379	0.0220668	-0.019953	-0.0172084	-0.0224785	-0.000882491	0.00996386	-0.0292909	-0.0344051	-0.0102831	0.0316144	0.0239361	-0.0317243	-0.0280112	-0.0101201	0.0192511	-0.0264023	-0.0136658	-0.01206	-0.0261614	-0.0162608	-0.0303265	-0.0322601	-0.0371177	-0.0274966	-0.0350752	-0.0293007	-0.025821	-0.0305568	-0.0261185	-0.0311567	-0.030387	-0.0341366	-0.000435612	-0.0278935	-0.0352648	-0.013145	-0.0241689	-0.0194149	-0.023146	-0.00815742	-0.0333981
chr2_199308760_199381820:-	-0.0188313	-0.0253646	-0.00125193	0.0319963	0.00472774	0.0264605	-0.0276564	-0.00493965	-0.00926497	-0.0202419	0.00489052	-0.0166519	-0.00366582	0.0116662	0.00125847	0.00408023	-0.00324272	-0.00660625	-0.0298589	0.0003468	0.0581662	-0.0280136	0.0212436	-0.0186492	0.00415161	-0.0261538	0.00639203	-0.0136355	0.0184285	0.0185719	0.0106339	0.0158296	0.0279157	-0.00294883	0.0160134	0.0429153	-0.021804	0.0192513	-0.0239582	-0.000872407	0.00489944	-0.0108436	0.00885247	0.00787156	-0.0161638	-0.0131635	0.0272076	-0.0148586	0.0390001
chr2_199348701_199433514:-	-0.0408422	-0.00310031	-0.0158657	-0.0162015	-0.0188594	-0.0315043	-0.0336154	-0.021382	-0.0139061	0.00141153	-0.036444	-0.0406491	-0.0148624	-0.0196139	0.00794118	0.00725613	-0.0344715	-0.00650843	-0.0266988	-0.0214487	-0.00763735	-0.0113032	0.0155819	-0.0205298	0.0032754	-0.04892	0.00566102	-0.0379887	-0.0522573	-0.0359058	-0.0249807	-0.0403212	0.00494771	0.00215557	-0.0245208	-0.0316698	0.0341188	-0.0187555	-0.0363822	-0.0347008	-0.0318588	-0.0107658	-0.0264494	-0.00430462	-0.00795632	0.00142289	-0.0263825	-0.0371774	0.0144162
chr2_199368605_199433514:-	-0.0779187	-0.120467	-0.0566179	-0.0826645	-0.0199947	-0.034847	-0.132887	-0.167569	-0.0963825	0.0249025	-0.0986628	0.0470873	0.0342486	0.117781	0.000773889	-0.134884	-0.00808563	-0.0921762	0.0334999	-0.048032	0.0750301	-0.15206	0.0961958	0.0137083	0.041235	-0.0699731	0.046147	0.124501	-0.0284087	-0.0166262	0.0049884	0.0352612	0.03995	0.128663	-0.131583	-0.156647	0.0117501	-0.0975084	-0.113652	0.094269	-0.0933474	-0.0487024	0.0474223	-0.0763395	0.0463533	-0.133612	0.0541666	0.0659024	-0.0372622
chr2_199380364_199433514:-	-0.0685943	-0.0533643	-0.0449408	-0.0482237	-0.0653875	-0.0570028	-0.0491297	-0.0756823	-0.0486589	-0.0750181	0.0270331	-0.0288875	-0.0427563	-0.0629759	-0.0805678	-0.0674759	-0.0013587	-0.0599262	-0.0522633	-0.0436354	-0.0563265	-0.0119972	0.0159376	-0.0400661	-0.0484919	-0.0334997	0.000734569	-0.0208949	-0.00700704	-0.0357247	-0.0551069	-0.0519525	-0.0398453	0.0188576	-0.0314354	-0.0497228	-0.0380425	0.0154913	-0.0670311	-0.0583671	-0.0664974	0.0105821	-0.0239428	-0.000609988	-0.0452859	-0.0330884	-0.0367691	-0.0427592	-0.0481243
chr2_202464809_202467689:+	0.0517415	0.0595335	-0.0100403	0.028176	-0.0170426	0.0293917	0.0558824	-0.0481098	-0.0502675	0.149289	-0.0482092	0.031285	0.0644404	0.293545	-0.0497164	0.0721791	0.0287266	0.0301575	0.0123116	0.0664649	0.134832	0.0554701	0.114116	0.0896771	0.0261463	0.0510489	0.0747228	0.0237431	0.0112579	0.0962056	-0.0279869	0.131242	0.0358188	0.0696732	0.0554052	0.0995245	0.0210255	0.0577717	-0.011234	0.148172	0.0791421	-0.0171601	0.0390033	0.0421736	0.121999	-0.00637257	0.0412043	0.00935089	0.00817595
chr2_202555252_202556531:+	0.0343472	0.00961576	0.0450044	0.00856667	0.00629379	0.011391	0.0094128	0.0131086	0.018733	0.00957768	0.00806744	0.0103831	0.0131939	0.00676634	0.00857406	0.0103968	0.00788093	0.0225042	0.0213155	0.0105654	0.0604147	0.0275588	0.0322025	0.0198697	0.00903378	0.0610665	0.0232614	0.0100592	0.0355268	0.0285727	0.0424911	0.0160356	0.0108323	0.0104676	0.0532034	0.0447146	0.0476226	0.0728623	0.0162872	0.0248996	0.00474945	0.0037113	0.00686113	0.0549024	0.0686009	0.0211448	0.00481918	0.00738621	0.00513373
chr2_20307978_20327378:-	0.00420126	0.0195562	0.00447206	0.0184923	0.0132919	-0.00882014	0.00250446	0.0123173	0.012868	0.00291614	0.0169354	-0.00255454	0.0239831	0.00695395	0.0225049	0.00230947	0.0403272	0.0492536	0.00139284	0.0152259	-0.000433527	0.00259062	0.0255481	0.00579297	7.15e-05	0.009907	0.0206954	0.0120091	0.045396	0.0235496	-0.00365151	0.00676294	0.0366086	0.00659348	0.0196651	0.0062681	0.00169064	0.0109036	0.0070009	0.0428068	0.00146577	0.00468067	0.0227222	0.0151518	0.00376864	0.0177158	0.00192595	-0.005435	0.00611256
chr2_207976651_207977586:-	-0.119647	0.0181248	-0.0908666	-0.0130946	-0.0627898	-0.0442461	-0.0923854	-0.0836892	-0.0879237	-0.0506448	-0.105688	-0.0291394	-0.0857325	-0.053048	-0.0257733	0.0991393	0.0293161	0.0292592	-0.0753412	-0.0641724	0.075216	0.0269039	-0.0799408	-0.0516461	-0.0420715	-0.0813046	-0.0663828	-0.00388074	-0.0103743	-0.0845066	-0.109248	-0.0303767	-0.085668	-0.0451513	-0.0672271	-0.0594778	-0.102187	0.0150944	-0.040941	-0.0637035	-0.0480429	-0.0970119	-0.0440039	-0.0293776	-0.00340735	-0.0429307	-0.0403031	-0.00626216	-0.139579
chr2_210153495_210154611:-	0.0328536	0.0294663	-0.0259423	0.0133565	-0.0365642	-0.0297687	-0.0269584	-0.0147586	-0.00731166	-0.0100808	-0.0581619	-0.0185107	-0.00879127	-0.0109382	-0.0143642	-0.0272289	-0.011075	-0.0440639	-0.0306572	-0.0513207	-0.0291638	-0.0180548	-0.0306446	0.0126609	-0.00316542	0.0189402	0.00124158	0.0187391	0.0172507	-0.0267775	-0.00549033	-0.00878605	-0.0123214	-0.00743147	-0.026973	-0.0165735	-0.0196042	0.0135694	-0.0402625	0.0261559	0.00547925	-0.0273628	-0.0152047	-0.00232507	-0.00703907	-0.0341917	-0.0158914	0.000647626	-0.0114554
chr2_222900674_222909150:+	-0.0306032	-0.0270863	0.0089738	-0.00204788	-0.00911284	0.00775554	-0.00965786	-0.0190885	-0.00864356	-0.00986728	-0.0283853	-0.0292822	0.0115972	0.00742783	-0.0271712	0.0143676	-0.0142533	-0.0021304	-0.030734	-0.00301929	-0.0341102	-0.00933259	0.00349026	-0.0141847	-0.0275962	-0.0233045	-0.00678299	-0.025433	-0.0327136	0.032267	-0.0221867	-0.00149235	-0.0319482	-0.0282111	-0.00886087	-0.0115564	-0.0234931	-0.0243374	-0.012332	-0.00421822	-0.026073	-0.0242963	-0.0286802	-0.0164215	0.0335043	-0.0261743	-0.0224386	-0.0293981	-0.00904277
chr2_226864604_226914351:+	0.00370935	-0.0110682	-0.0165646	-0.0551393	-0.0502263	-0.0399917	-0.0474286	-0.0486955	-0.0356871	-0.049491	-0.0628176	-0.0222377	-0.0307765	0.0590093	-0.0500567	0.0189815	0.0290603	0.00708438	-0.0354234	-0.0372841	0.0137946	-0.0320559	-0.0102641	-0.0128814	-0.013316	-0.0472211	0.000256381	0.0259763	0.0105662	-0.0458455	-0.0416625	0.0213884	0.0231222	0.00789487	-0.0140854	0.000764569	-0.0450617	-0.0510358	-0.0127983	-0.0591848	0.0446444	-0.0409672	0.0105484	-0.001683	-0.0398445	-0.0170189	-0.0480672	-0.0209129	-0.051175
chr2_226906793_226914351:+	0.00695282	0.00862199	-0.00270443	-0.0156845	0.0094607	-0.0122436	0.0049141	-0.00336142	-0.00798121	-0.0169342	-0.0205394	-0.0141272	0.0139377	-0.011787	0.0136137	-0.0112964	0.0230739	0.00929048	0.0205267	0.014218	-0.0173575	0.00746639	0.0238015	0.00031028	0.00991506	0.00886427	0.00632297	-0.0157048	-0.00621399	0.00902007	-0.00506357	0.01631	-0.00596366	0.0719721	-0.00968671	-0.00717214	-0.0140949	-0.00758495	-0.0115235	-0.0149164	0.0222972	0.00205354	0.0188294	0.0204012	-0.00981333	0.0326677	0.0236956	0.0112188	0.0160433
chr2_228016406_228020156:-	-0.0913907	-0.0387061	-0.273612	-0.115677	-0.0955242	-0.0891863	-0.0942003	-0.0717088	-0.0930963	-0.094004	-0.0990873	-0.0358745	-0.0625893	-0.0968842	-0.0933431	-0.108337	-0.0617462	-0.0987507	-0.104022	-0.0734819	-0.0730008	-0.0139267	-0.0954596	-0.120167	-0.0889766	-0.0978203	-0.0750403	-0.053279	-0.0544589	-0.0731241	-0.0799014	-0.0538946	-0.0661878	-0.05873	-0.0832886	-0.0772442	-0.0889423	-0.0712052	-0.105678	-0.107053	-0.0885861	-0.0930853	-0.122268	-0.0988695	-0.059537	-0.0941042	-0.0220421	-0.112755	-0.0718113
chr2_229858772_229880128:-	0.00723784	-0.00194136	-0.0367041	0.00494872	0.0207116	-0.0464986	0.00295048	-0.019487	0.00856195	-0.00258548	0.0140477	-0.0179465	0.029815	0.0830256	0.00804433	0.00656679	0.0200527	0.0105458	-0.00912868	0.0726416	0.112162	0.0343839	0.0427245	0.00993284	0.0123916	-0.0310719	0.0386302	0.051077	0.006279	0.035878	-0.0101096	0.0345538	0.0393599	0.0233146	0.0174554	0.00386286	0.0014915	0.0107613	0.0283988	-0.0179167	0.0046553	-0.0360625	-0.0394354	0.053805	-0.00130968	-0.000488862	-0.0056513	-0.00462775	-0.00470827
chr2_232747615_232761436:+	-0.078647	-0.0175872	-0.0277162	-0.0251295	-0.0474055	-0.032561	-0.00652888	-0.0412293	-0.0312631	-0.0730442	-0.0435578	-0.0179735	-0.0119158	0.0377936	-0.0403246	-0.0309619	0.0230283	-0.0203006	0.00244448	-0.0601345	0.00538997	-0.0315283	0.0404314	-0.00100902	-0.0266167	-0.00166681	0.000188492	-0.0615962	-0.0780844	-0.0563477	-0.0210579	-0.0550774	-0.00982105	-0.00959707	-0.0552628	-0.0461226	-0.0324722	-0.0425943	-0.014969	-0.0302202	-0.0506579	-0.0123468	-0.0625323	0.00803749	-0.0373544	-0.0407078	-0.00737779	-0.0622597	-0.0906044
chr2_232787150_232796221:+	-0.0557067	-0.0255697	-0.025637	-0.0425899	-0.0525387	0.018282	-0.0124786	-0.0399418	-0.0255766	-0.0265538	-0.0464319	-0.0473577	-0.0355755	-0.0195622	-0.0264562	-0.0600525	-0.0127497	-0.0170645	-0.0216688	0.0133753	-0.0398129	-0.0111961	-0.0251414	0.0638267	-0.0445291	-0.0158075	-0.00645917	-0.000654311	0.0694184	-0.0287253	-0.0531334	-0.0157181	0.0111059	-0.0565859	-0.0362417	-0.0174001	0.0044822	-0.051599	-0.0363595	-0.0611777	-0.0487026	-0.0553251	-0.0277649	-0.0286841	-0.031453	0.01627	0.00292034	-0.0240121	-0.0118473
chr2_235740963_235750488:+	-0.00572785	0.000704529	0.00265262	0.00419688	0.0143147	0.0144757	0.0334046	0.00156658	0.00262745	0.013265	0.00787212	0.0179983	0.0162444	0.014217	-0.00442081	0.0179803	0.0291084	0.0205804	0.0208858	0.00950119	0.00755496	-0.00503567	0.00955787	0.01921	0.0071972	0.0177977	0.0223357	0.0118556	-0.00128658	0.0181149	-0.0134627	0.0170224	0.00159062	-0.0018957	-6.4e-05	-0.00265794	0.00568324	0.0458596	0.00731246	0.0120772	-0.00977663	0.00776506	-0.0100384	0.00445532	0.0244097	0.00661988	0.0149563	0.0251153	-0.00159824
chr2_238182065_238185287:-	-0.0428007	0.0336655	-0.0644694	-0.0848076	-0.104603	-0.0570665	-0.101548	-0.0598472	-0.0551036	-0.0474248	-0.00129328	-0.0431409	-0.0551277	-0.00479172	-0.0990279	-0.0363231	0.0462069	0.0256479	-0.0526045	-0.0727688	-0.0883201	0.0484074	-0.0475479	-0.0371608	-0.0601682	-0.0200946	-0.0667855	-0.0153379	0.0431038	-0.064547	-0.0445452	-0.0324525	-0.00356904	-0.0819526	-0.0493944	-0.00525239	-0.0296573	0.0771417	0.00837148	0.00956759	-0.0617933	-0.100448	-0.0603507	-0.00635746	-0.0677693	-0.0260871	-0.0657529	-0.0235481	-0.118882
chr2_23958301_23984831:+	-0.0176806	-0.0113838	-0.0134293	-0.00967362	0.0232347	0.0201999	-0.0108813	-0.00023146	0.00303896	0.0140792	0.000534644	0.0112388	0.00380276	-0.00771219	-0.000978353	-0.00900592	-0.00777064	0.00428238	0.00558401	0.0255756	0.00906021	-0.0114608	0.00985699	0.0211871	0.00522561	-0.00187443	-0.0023684	0.0251936	-0.00775327	-0.00968022	-0.010324	-0.0117841	0.0400883	0.0134332	-0.00666046	-0.015889	-0.00779129	0.0997304	0.00455391	-0.0096812	0.0322488	0.00338267	-0.00870517	-0.00999811	0.0358355	-0.0166745	0.000233183	0.0144956	-0.0149051
chr2_239990074_240007370:-	0.00224126	-0.000794844	-0.0022574	-0.00576904	0.0148205	0.0187863	0.0267497	0.0086406	0.0273495	-0.00671071	0.0112835	0.0219808	0.031635	-0.00386637	0.00267803	-0.00659582	0.0537563	0.00965375	0.0120512	-0.00326923	0.0323913	0.0356393	0.0729776	0.00910375	-0.000369657	-0.000597767	0.015635	0.0187735	0.0315179	0.0168428	-0.00325339	0.0256757	0.00124027	0.0289236	-0.0010118	-0.00263822	0.00826031	0.0648347	0.0191445	0.0360076	0.0118432	0.0197244	0.0125226	0.0583365	0.0408493	0.0584865	-0.00634914	0.0443667	0.00246319
chr2_24135119_24147086:+	-0.0405697	0.0286693	-0.0829792	-0.090954	-0.0792583	-0.101369	-0.107927	-0.0932165	-0.080972	-0.0462224	-0.06529	-0.0488203	-0.0897102	-0.0363414	-0.104097	-0.0417709	0.000425332	-0.104715	-0.0886798	-0.0551457	0.0557703	-0.0478685	-0.0312812	0.066304	-0.0182024	-0.0865489	-0.0157183	-0.0441767	-0.0156405	-0.0840324	-0.0934817	-0.110665	-0.0481252	-0.0858266	-0.0765109	-0.000943267	-0.0885733	0.0273035	-0.0558962	-0.0875896	-0.0748544	-0.0862817	-0.085016	-0.025068	-0.0450412	-0.0778957	-0.0540348	-0.0593704	-0.10956
chr2_29133655_29145367:+	-0.0115372	0.0101567	-0.0109603	-0.0118893	0.000545364	-0.0060426	-0.0237496	-0.00421943	-0.0251944	-0.0268853	-0.00804885	-0.0091596	-0.0120296	0.075845	-0.0209683	0.00310492	0.0161953	0.017219	-0.0201182	0.0386579	0.0112403	0.00557382	0.0170481	0.0315608	-0.00479931	-0.000949153	0.0102549	-0.00195633	-0.00716643	0.0241334	-0.0255959	0.00191011	-0.00420293	-0.00934438	-0.00107585	-0.00621459	-0.01876	-0.00873595	-0.0188381	-0.01796	-0.0217039	-0.00461759	-0.011944	-0.0186706	0.00457481	-0.0054047	0.00844247	-0.0217517	0.0168594
chr2_29133655_29157347:+	0.011353	-0.00441832	-0.00575753	-0.00394721	0.0145928	-0.00281548	-0.0153961	-0.00445002	-0.00734198	0.00317732	-0.0138675	-0.00514448	-0.00126151	0.0423528	-0.0120743	0.0100305	-0.0150625	-0.00412268	-0.0121624	-0.0101804	0.0180601	0.00586881	0.0189432	0.0492967	0.0114549	-0.00126372	-0.00198035	-0.0107379	-0.00494923	0.0290697	-0.0178447	0.0355804	-0.00780439	-0.0125241	0.0179423	-0.00430171	0.00290055	0.0167215	-0.0110705	-0.0105365	-0.0120065	-0.0100608	-0.0133507	0.00262591	-0.00708002	-0.00935962	-0.00351564	-0.0108203	-0.00440852
chr2_30459552_30568176:+	-0.0208092	-0.0267717	-0.0232401	-0.00170047	-0.0190883	-0.010117	-0.00800636	-0.0170963	0.00272094	-0.0185978	0.0083758	-0.0342832	-0.0379349	-0.00761086	-0.00582692	-0.016947	0.0495773	0.00988615	-0.0303528	-0.0289015	-0.0366354	-0.0250244	-0.0168824	-0.0230197	-0.0205973	-0.0324562	-0.0340404	-0.00962167	-0.0421277	-0.00416038	-0.0106574	-0.0247765	-0.00162232	-0.0265986	-0.0267531	-0.0260386	-0.0344668	0.0339709	-0.0215968	0.051332	-0.0546588	-0.0250917	-0.00264868	-0.0300068	-0.0502207	-0.00393532	-0.0250823	-0.0263813	-0.034918
chr2_32377588_32395593:+	-0.0466089	0.0434572	-0.00857457	0.10033	0.00437615	0.0315484	0.00109961	-0.0160864	-0.00400216	-0.0223605	-0.00693738	0.0114862	-0.0178818	0.0372729	-0.0181725	0.00614306	-0.0291721	0.00716182	0.0328165	-0.010548	0.016548	-0.0249773	0.0482372	-0.0140346	0.0649903	0.0157996	0.0366129	0.00220884	-0.007169	-0.0128481	-0.0137766	0.0222467	0.0183196	0.160657	-0.0231215	0.00944939	-0.0138453	0.0916239	-0.00461006	0.0364673	0.0380629	-0.00780698	-0.0236433	0.0313053	-0.0291058	-0.00843286	0.0255782	0.018915	0.039554
chr2_32377588_32406557:+	0.0257691	0.0401335	0.00800031	0.0347762	0.0200075	0.0560667	0.00565325	0.0133188	0.00302776	0.00402125	0.0342906	0.00438249	0.0485697	0.0608384	0.00115706	0.00172549	0.00128634	0.0336358	0.0338437	0.0438963	0.0196645	0.0151576	0.0253517	0.00591716	0.00306672	0.0130369	0.0343837	0.0343992	0.0199005	0.00354548	0.00617952	0.0142546	-0.00363494	0.10246	0.00107731	0.0226157	0.00502681	0.0024353	0.0193834	0.0688291	0.00756272	0.0065204	0.00610521	0.00738877	0.0486141	0.0498844	0.00495627	0.017404	0.0229564
chr2_32414769_32416163:+	-0.0146787	0.0103381	0.00181448	-0.000342823	-0.00537957	0.00148636	0.00487172	-0.00209647	-0.00323229	0.00473249	-0.0153737	0.0104339	-0.00244434	-0.000575284	-0.0185331	0.0131927	0.0166507	-0.0148848	-0.00250266	0.00257568	0.0278842	-0.00106609	0.0168345	0.0133827	-0.00979382	0.00057154	-0.00996095	-0.00665222	-0.0126406	0.00971727	-0.0187506	-0.00273184	-0.00636447	0.0354362	-0.00255524	0.00379897	-0.00527144	-0.0143914	-0.00574255	0.0408868	-0.0127279	-0.0193721	0.020773	0.0277022	-0.0069256	-0.0117842	-0.00508462	-0.0152261	0.0109049
chr2_36441258_36442735:+	-0.0157986	-0.00876201	-0.00886663	0.0207183	0.00743901	0.00769363	0.0217689	-0.00891104	0.000853784	-0.00999156	-0.00943715	-0.00952252	-0.00233199	-0.00820579	-0.00735059	-0.00972752	0.00981949	0.00544275	0.00400342	-0.0109377	-0.00973997	0.00515675	0.0226541	-0.00834126	-0.00917678	-0.00755732	0.024055	-0.00813799	-0.0102855	0.010963	0.0215684	0.010647	0.0135328	0.0117719	-0.00820686	-0.0083045	0.0221917	-0.00747648	-0.00522554	0.0144749	-0.00676093	0.0201955	0.00377641	-0.00619092	0.0218232	-0.00677905	-0.00573162	0.0123911	-0.00945049
chr2_40428473_40430304:-	-0.851562	-0.478857	-0.578523	-0.383312	-0.697883	-1.13267	-0.608644	-0.927526	-0.366592	-0.828353	-0.541024	-0.551281	-1.00151	-0.360898	-0.612906	-0.963221	0.898323	0.0356561	-0.480297	-0.651038	-1.01803	-0.348842	0.0773378	-0.905881	-0.860157	-0.617087	-0.261067	-0.115851	-0.15352	-0.929229	-0.469503	-0.541955	-0.992451	-1.03231	-0.931942	1.12201	-0.643004	-0.66479	-0.460529	0.084453	-0.11771	-0.749132	-0.529184	-0.262528	-0.0432907	-0.390437	-0.329467	-0.445656	-1.15044
chr2_42718988_42723035:+	-0.0218954	0.00812629	-0.00392088	-0.0182547	-0.00576853	-0.0138452	0.0323923	-0.00609789	0.0507554	0.00312151	0.0203595	-0.00842477	0.00687651	-0.0118345	-0.0121478	-0.0105516	0.00419866	0.023941	0.000410231	0.0173334	-0.00160362	0.0228263	0.00517893	-0.00812689	-0.00408153	-0.00040293	0.0124635	0.0238504	-0.00860894	-0.0116353	-0.0237657	-0.00176123	-0.0101956	-0.012574	-0.0116719	0.00791681	0.0260106	-0.00794698	0.0124238	-0.0181739	-0.022298	-0.00318223	-0.0185109	0.00168084	0.0325755	0.00967537	-0.00910985	0.00496173	0.0144711
chr2_50236789_50506617:-	0.00529898	-0.0529578	-0.038882	-0.0201393	-0.0403303	-0.0348567	-0.0483633	-0.0470705	-0.0300872	-0.0343441	-0.0656292	-0.0385596	-0.00745783	-0.0193227	-0.0256413	-0.0652521	-0.030703	-0.0721342	0.00677442	-0.0260677	-0.0321096	-0.0171447	-0.00562154	-0.0331569	-0.0446133	-0.0620023	-0.0259337	-0.0322549	-0.0234096	-0.0380246	-0.0296461	-0.0526166	-0.0308493	0.0453061	-0.0308893	-0.0521845	-0.0296654	-0.0334879	-0.0446771	-0.0494379	-0.0290329	-0.0249069	-0.023606	-0.0704676	0.00179024	-0.05145	-0.0260809	-0.0346612	-0.0370407
chr2_50465442_50506617:-	-0.0475561	-0.0297483	-0.0432242	-0.0400525	-0.0191928	-0.0257777	-0.035804	-0.0359428	-0.0310061	-0.0273071	-0.0482675	-0.0356505	-0.0269816	0.0175508	-0.0346992	-0.0370721	-0.0197208	0.00851782	-0.0119997	-0.00811689	-0.0396029	-0.0327313	-0.0341212	8.31e-05	-0.0333763	-0.0433428	-0.0188222	-0.0123734	-0.0316751	-0.035683	-0.0328391	-0.0374103	-0.0439427	-0.0123524	-0.0340192	-0.017011	-0.0329548	-0.0165566	-0.0390545	-0.0160355	-0.0256929	-0.0230632	-0.0063161	-0.0353269	-0.0242612	-0.0249833	-0.0245013	-0.0426814	-0.0453755
chr2_50472298_50620183:-	-0.00436723	-0.0357425	-0.0755899	-0.00275533	-0.0443939	-0.0196918	-0.0177727	-0.0468503	0.0452392	-0.0419829	-0.0133685	-0.0251747	-0.0516045	-0.0057574	-0.0388803	0.00173614	0.00424166	0.0373981	-0.0534243	-0.0182529	-0.0858613	-0.0560283	-0.0194069	-0.064654	-0.0733467	-0.0361736	-0.0338335	-0.00211637	-0.0435998	-0.0235808	-0.0185536	-0.0167865	-0.0651418	-0.0733933	-0.0661374	0.21825	0.0120009	-0.0270149	0.00859367	-0.0632623	-0.00553958	0.018228	-0.0577233	-0.00768039	-0.0448414	0.0454704	-0.0277668	-0.0608947	-0.0598078
chr2_54813232_54829477:+	-0.0133989	-0.00853095	-0.0230847	0.0456907	-0.00255307	0.00294388	0.00556766	-0.0141709	-0.00481307	-0.0170077	-0.0141185	-0.0139243	0.0275473	0.0201863	0.0429401	-0.0143067	-0.0044383	0.000700486	-0.00129263	-0.0224691	-0.0113901	-0.0235833	0.0556311	0.00494	-0.0135298	-0.0195188	0.00652229	-0.0226399	0.0190765	0.0108086	-0.0224819	0.0197186	-0.00527946	-0.0206229	-0.0188673	0.00674951	-0.020726	0.0151541	0.0117954	0.000453644	-0.0110415	0.00908196	-0.00364085	-0.00791141	0.00902295	-0.00963393	-0.00317585	-0.0206343	-0.018428
chr2_54813232_54928751:+	-0.00825442	0.0232388	-0.0124862	-0.00811801	0.0222055	-0.00425616	-0.00830186	-0.0108517	0.00181531	0.0341372	-0.0100189	0.0471875	0.0269028	0.0334147	-0.00961952	-0.00105594	0.0222409	0.0216683	-0.00869	-0.0193472	0.0109035	-0.00911209	0.0249154	0.00643559	-0.00296708	0.00634808	0.0353941	-0.00161381	0.020865	0.00275778	-0.020954	0.0433073	0.0087441	-0.0110525	-0.00726455	0.0482013	-0.00884088	0.0443029	0.0140442	-0.0217695	0.00402835	-0.0161355	0.0402498	0.0625362	0.0608622	0.00253212	-0.000274759	0.0250434	0.0456594
chr2_54982515_54987698:-	-0.0755534	0.0353709	-0.0373906	-0.0478275	-0.0156155	0.0223236	-0.0444988	-0.0595132	-0.0710382	-0.0944084	-0.021501	-0.0376373	-0.0394639	0.0519123	-0.0974005	-0.00929727	0.0511434	-0.0721657	-0.107018	-0.0443798	0.174281	-0.0530069	0.0872615	-0.00739129	-0.0328545	-0.0629203	-0.0255524	-0.0382177	-0.042308	-0.0427165	-0.0701517	0.00581533	-0.0468555	0.00420738	-0.0778311	-0.0785784	-0.0663329	-0.0472816	-0.0431741	-0.0605981	-0.0664819	-0.0596712	-0.00828982	-0.0828706	-0.0362327	-0.037093	0.0117404	-0.103261	0.0929151
chr2_55025086_55028220:-	0.0139813	0.0712202	0.0197968	-0.00817145	0.0311537	0.0387759	-0.00934396	-0.0014765	-0.00177074	0.0545817	0.0464344	0.0223448	0.0228575	0.00476179	0.035681	0.00577217	0.0950669	-0.0139103	-0.00835816	0.138471	0.118279	0.0356649	0.0132206	0.0352658	0.00210258	0.0067493	0.0383979	0.0326586	0.0529019	0.108727	0.106804	0.0389855	0.0473442	0.00292228	-0.000605043	0.0262181	0.0357585	0.0272695	-0.00197356	0.0179873	0.0124456	0.00684949	0.0158495	0.00606738	0.00317264	0.103865	0.0457937	0.00245517	0.0158985
chr2_55332566_55335164:-	0.00480415	-0.017039	-0.025296	-0.0287533	-0.0141288	0.00434391	-0.0314457	-0.0288568	-0.00893976	-0.0128295	-0.0213494	-0.0325118	-0.0177906	0.0118755	-0.0116888	-0.0330384	-0.0322274	-0.0169213	0.00170157	-0.0320914	0.0833329	0.0392444	-0.00184439	0.00718779	-0.024439	-0.0310659	0.027356	-0.0100735	-0.0256713	0.0477602	-0.0279671	0.00662909	-0.014305	-0.0246694	-0.0293569	-0.00219746	-0.00443853	-0.0184896	-0.0135587	-0.0303197	-0.0253237	-0.0285722	-0.0107606	-0.00961125	-0.0182169	-0.0088573	0.0312117	-0.035335	-0.0126933
chr2_58048827_58089723:+	-0.0675085	-0.0606419	-0.0289452	-0.0851165	0.00448894	-0.066272	-0.0655586	-0.0642681	-0.0487978	0.0787265	-0.103885	-0.0535112	-0.0471322	-0.0391996	-0.0924316	-0.0953392	-0.0255508	-0.0555329	-0.073476	-0.00949044	-0.0315973	-0.0261048	0.0224451	-0.0393148	-0.0396374	-0.0790507	-0.0542671	-0.120716	-0.0711916	0.100238	-0.10455	-0.0158357	-0.0268882	-0.088386	0.0312842	-0.0627591	-0.0493763	-0.00747875	-0.0296949	-0.016751	-0.00340407	-0.0674082	-0.0210506	-0.0592681	-0.0506078	-0.139694	-0.0277685	-0.0439422	-0.0848689
chr2_58198594_58232112:-	-0.00149176	0.0314589	0.00351501	0.00414662	-0.00773963	0.0115221	-0.0211184	-0.00272682	-0.00518727	0.0185432	0.00419297	-0.0180437	-0.0205643	0.0229964	-0.0201231	0.000894534	0.0234035	-0.0125571	-0.0148614	-0.0334973	-0.0154937	-0.0141181	0.020848	0.0437623	-0.00238692	0.000900868	-0.0162895	0.0291139	-0.0241372	-0.0185982	-0.010958	0.0327783	-0.012078	-0.00510842	-0.0112381	0.00999427	0.000991031	-0.0110744	0.00184146	-0.0128393	-0.0137286	-0.0112823	-0.0069601	-0.00772119	0.0100703	-0.0264279	0.00511679	0.00218783	0.0161165
chr2_61115979_61118116:+	0.0274026	0.0983831	0.0292641	0.0449606	0.0306337	0.0381034	0.0278173	0.0218917	0.0302584	0.00416248	0.0389951	0.0230479	0.0624711	0.0797365	0.0603236	0.0293912	0.116314	0.109128	0.0327117	0.0688056	0.0752045	0.0737814	0.0321439	0.0552749	0.0194323	0.0550335	0.0381768	0.00718127	0.0656744	0.0821942	0.00619477	0.0685677	0.00461032	0.00466701	0.00468358	0.111466	0.0516091	0.0530306	0.039081	0.0271458	0.0662669	0.012705	0.0329925	0.0349347	0.0734583	0.00739298	0.0269303	0.0320305	0.111895
chr2_61522611_61526521:-	-0.0524964	-0.0247221	-0.0406723	-0.00211328	-0.0502872	-0.0289135	-0.0180541	-0.0122458	0.000759518	-0.0286717	-0.0745739	-0.0326497	-0.0427295	-0.0243905	-0.014273	-0.0362506	-0.00735596	0.00772436	-0.0244176	-0.0290514	-0.0305164	-0.0234198	-0.0258166	-0.0298454	-0.0289424	-0.0277463	-0.00650529	0.00382328	-0.0315349	-0.0315357	-0.0586028	-0.00441922	-0.0312537	-0.0146307	-0.00740784	-0.0402778	-0.0293787	0.0291819	-0.0113246	0.0154242	0.0128556	-0.0370333	-0.0319053	0.0700371	0.00863628	-0.0153414	-0.0134545	-0.014073	-0.0451076
chr2_62979188_62996766:+	-0.010448	0.003489	0.0323875	-0.00434377	-0.00828518	0.00792667	0.00554324	-0.00284456	0.00249854	0.0150134	-0.0095922	0.0207494	-0.00326676	-0.00667644	-0.00988372	0.00220527	0.0839586	0.0205451	0.00283374	-0.00799015	0.0230801	0.0270209	-0.00632732	-0.00165802	-0.00548638	-0.00221832	-0.00376481	0.0121244	0.042593	0.0191129	0.0109532	0.00378126	-0.000496339	-0.00933406	-0.00565363	-0.00228983	0.0197627	0.0428438	0.00664548	-0.00954858	0.0125451	-0.00590157	-0.00159646	-0.00906367	0.0132266	0.00703157	0.0016023	0.011566	-0.00893438
chr2_71363153_71380565:+	-0.0308132	0.0304852	-0.0489502	0.00123052	-0.0541959	-0.0575844	-0.036184	-0.0306318	-0.016839	-0.00630216	-0.00246316	-0.00629241	-0.0201757	-0.000252092	-0.00763566	-0.0234321	-0.0233081	-0.0184275	-0.0249731	-0.00880671	-0.0339712	-0.0309328	-0.0610698	-0.0413649	-0.0211587	-0.0313598	0.0298237	-0.0289792	-0.0135839	-0.0206805	-0.0239553	0.00637693	-0.0128281	0.00411094	-0.0234518	-0.0502561	-0.0439526	-0.0359423	-0.0409004	-0.00931744	-0.0372206	-0.0190609	-0.0224729	0.00511885	-0.0254777	-0.0387191	-0.0355958	-0.0101078	0.00160992
chr2_71426460_71427414:+	-0.0670263	-0.0137333	0.00689508	-0.039736	-0.0703933	-0.0228657	-0.0521832	-0.0539982	-0.0568539	-0.0552344	-0.0582822	-0.043431	-0.0430447	-0.0499946	-0.0415879	-0.044298	0.00564209	-0.011521	-0.0401169	-0.080327	-0.0576349	0.094417	-0.015853	-0.0222791	-0.00746903	-0.0336772	-0.0197062	-0.0254442	-0.0457029	-0.0376641	-0.042618	-0.0291886	0.00509748	-0.0654339	-0.0464923	-0.0487067	0.0227409	-0.0440657	-0.0487818	-0.0216275	-0.0409299	-0.0225515	-0.0221935	-0.0533911	-0.0220208	-0.0270268	-0.0458266	-0.0153791	-0.0342391
chr2_72718103_72733118:-	0.0357845	-0.174065	-0.0764677	0.197624	0.150215	0.0793279	0.431777	-0.081274	0.309833	0.105305	-0.156742	0.104105	-0.027864	0.32787	0.0164923	0.0116619	1.05472	0.964843	0.83721	-0.0030039	-0.444547	0.887029	0.539907	-0.322301	-0.398822	0.166914	0.217017	0.43295	1.14455	0.322128	0.26834	0.177486	0.211151	-0.153016	-0.139793	0.614508	0.117789	0.864099	0.279932	0.769691	0.388125	0.15507	0.0218217	0.575854	0.399797	0.313461	-0.168895	0.411355	0.0274055
chr2_72731007_72733118:-	-0.355599	-0.252109	-0.321665	-0.275993	-0.310916	-0.397036	-0.110578	-0.242446	-0.189887	-0.358944	-0.143341	-0.173088	-0.282035	-0.227464	-0.356514	-0.255992	0.00830766	-0.0582437	-0.0344262	-0.406531	-0.396891	-0.0655417	-0.203074	-0.293776	-0.297348	-0.253149	-0.267928	0.0275348	0.0687735	-0.284033	-0.234701	-0.289724	-0.258514	-0.311552	-0.304494	-0.0424833	-0.312195	-0.0521493	-0.250905	-0.130358	-0.293234	-0.283339	-0.391619	-0.208432	-0.203449	-0.175367	-0.145934	-0.174164	-0.351454
chr2_73557220_73559142:+	-0.026851	-0.0186938	0.00221814	0.000880296	-0.0020829	0.0162067	-0.0173242	-0.0213861	-0.00982273	-0.00904306	-0.000455622	-0.000768706	-0.0139124	0.0314937	-0.00930884	-0.0254508	0.0798956	0.0156295	-0.0125655	0.0308347	0.0155848	-0.0432946	0.00709241	0.0394854	-0.0175083	0.0142284	0.0299689	-0.0121563	-0.0196923	0.0182579	-0.0343777	0.0411847	-0.0175626	-0.0291589	-0.0126171	-0.0109058	0.00183292	-0.0288298	-0.0077097	-0.00576097	-0.0228004	-0.023373	-0.0220107	0.0168232	0.000846424	0.00281743	0.00481647	0.013446	0.0470775
chr2_85861181_85863485:-	0.0355745	0.0409779	0.00408613	0.00536685	0.0152935	0.0181057	-0.000444823	0.00474231	-0.00958976	0.0500266	0.0348593	-0.00811305	0.0035068	-0.00614014	-0.00847991	-0.014296	0.00623452	0.0236831	0.0580987	0.0156687	0.0162532	0.0673386	0.00806072	0.0484322	0.0393446	0.0267887	0.014338	0.0417261	0.034149	-0.00976135	-0.00377045	0.0304073	0.0183666	-0.016405	0.00452319	-0.00485747	-0.00885384	0.0960131	0.0274019	0.013425	-0.00299688	-0.00266406	0.0347135	0.00144093	-0.00442406	0.0348616	0.0127711	0.0148121	0.00649285
chr2_86251957_86264041:-	-0.0241406	-0.0237594	-0.0248923	-0.0234364	-0.0220641	-0.0170012	-0.0312785	-0.0253356	-0.0175096	-0.0325602	-0.0142087	-0.0259273	-0.00714759	-0.0320422	-0.0300318	-0.0311787	0.00463918	0.0298553	-0.0186518	-0.0067185	3.57e-05	-0.0118995	-0.00119776	-0.0139527	-0.0306891	-0.0225774	-0.0196343	-0.0230381	-0.028806	-0.0288416	-0.0258309	-0.0269856	-0.00115045	-0.0322084	-0.0277034	-0.009533	-0.0329083	0.0212692	-0.0318218	-0.0315529	-0.0309044	-0.0184377	-0.0233398	0.0083349	-0.0127395	-0.0293019	0.00308417	-0.00439146	0.0198165
chr2_8908621_8958642:-	-0.1183	-0.0824498	-0.114209	-0.0912977	-0.156509	-0.0651801	0.124418	-0.0850273	-0.115879	-0.10688	0.0453062	-0.130843	-0.0501118	-0.0641151	-0.0515169	-0.0320988	0.269362	-0.146454	0.0578178	-0.129166	-0.0599715	-0.15649	-0.125387	-0.0525756	-0.0896016	-0.0582448	-0.119119	0.149685	0.0621862	-0.109648	-0.120759	-0.104682	-0.141664	-0.168919	-0.0944909	-0.155423	-0.124857	0.0925775	-0.122462	-0.147475	-0.131809	-0.00791857	-0.110917	0.0809607	0.352817	-0.0790473	-0.112506	-0.0338513	-0.182113
chr2_8943187_8958642:-	-0.051975	-0.0201142	-0.0296764	-0.0527417	-0.0156794	-0.0712864	0.0219892	-0.0376553	0.065851	-0.0512449	0.0771978	0.00565749	-0.0210365	0.007937	-0.043724	-0.0581233	-0.00742103	-0.00621105	0.0292938	-0.0210832	-0.0671367	0.0298403	0.00120294	-0.0512436	-0.0629938	-0.0708683	-0.0180803	0.0502927	0.0637576	-0.0295782	-0.0739272	-0.0362327	-0.0715349	-0.0541981	-0.0518503	-0.0262077	-0.0471768	0.0665007	0.0172524	0.0333919	0.0641238	-0.0741242	-0.0758243	-0.0256736	0.017697	-0.0044005	-0.01232	0.0536077	-0.0257343
chr2_99186177_99195756:+	0.0115822	0.0120462	0.00650161	0.010053	0.0173637	-0.00821034	0.0235152	0.00675349	0.0406199	-0.0132796	0.0159106	0.0489602	-0.0143805	-0.022808	-0.0264716	-0.0149168	0.0319587	-0.0195018	-0.0142412	0.00886228	0.00783468	-0.00400286	0.0563325	-0.0181177	-0.0201033	0.0106787	0.0273156	-0.0165959	-0.0114451	0.00269416	0.0348284	-0.0190001	0.0299195	0.0016395	-0.0196806	-0.0177044	-0.0320758	0.096552	0.0206349	0.0365062	-0.0316482	-0.0400423	-0.0323398	0.0161249	0.0401296	-0.00717739	0.0355901	0.00678083	0.0111462
chr2_99462496_99464985:-	-0.0657966	-0.0233827	-0.188781	-0.0477327	-0.136131	-0.0722874	-0.110098	-0.103355	-0.11628	-0.103258	-0.135204	-0.0545508	-0.0479467	-0.0936054	-0.0684108	-0.11718	-0.0141653	-0.114134	-0.158321	-0.086164	-0.064444	-0.102767	-0.0488395	-0.0847311	-0.11461	-0.057427	-0.0553539	-0.0583614	-0.0253893	-0.0624151	-0.0893883	-0.0657912	-0.0842985	-0.10369	-0.104433	-0.0922344	-0.100619	-0.0952623	-0.0784434	-0.093926	-0.142389	-0.123482	-0.0799902	-0.0631101	-0.0283775	-0.129621	-0.0714073	-0.0876217	-0.0957137
chr20_23389946_23403072:-	0.0040898	0.0505038	-0.00936053	-0.0124348	0.000304115	0.000127677	0.0106341	0.00565198	-0.0100528	0.0701605	-0.0097967	0.00504039	0.00117822	0.00661096	-0.00803695	-0.0114612	0.0243158	0.00340117	0.00475304	-0.00759577	0.00323427	-0.00339386	0.0211899	0.037819	0.00186643	-0.00708978	0.0150882	-0.00332477	0.000579261	-0.0071915	0.00742729	0.0549377	0.00435957	0.0538527	0.00606911	0.0364547	0.0025833	0.0209676	0.0151103	0.00958439	0.00954322	0.0153544	-0.000460948	-0.00915554	0.0130831	0.00504245	0.0514132	0.00880935	0.00508144
chr20_2964272_2965202:+	0.0231932	-0.00089879	-0.011621	-0.00328308	-0.00581282	-0.0103584	-0.0337867	-0.0297854	0.0103027	0.0162672	-0.0213848	-0.00244296	-0.00128311	0.00715127	-0.0117341	0.00200131	0.00333795	-0.0123966	0.0169429	-0.0196644	0.00976754	0.0068739	0.0961284	0.0708042	-0.0139854	-0.0135551	0.0387416	-0.0093209	0.0147589	0.00519989	-0.0250922	-0.00193225	0.0475748	0.103532	-0.0300802	-0.0154866	0.0267529	0.0134105	-0.0181762	0.0207421	-0.0445529	-0.0207955	-0.0181346	0.0180034	0.0639002	0.0355642	0.00269146	0.014266	-0.017353
chr20_32316218_32316874:+	0.0350639	-0.00122218	0.000762957	0.0157546	0.00696023	0.0257367	0.00368514	-0.001115	-0.0189298	-0.0135984	0.00531441	-8.07e-05	0.0114805	0.0350857	0.0034246	0.0229777	-0.00838959	-0.0213465	-0.00695069	0.0239776	0.0304119	-0.0132947	0.0591801	0.0192314	0.0236816	-0.00246571	0.0387126	-0.0113921	-0.0155806	0.0128505	-0.024134	-0.000334144	-0.0170999	0.00642075	-0.00209565	-0.00483691	-0.000654033	-0.00585582	-0.00603378	0.0383293	-0.0135088	-0.00194906	0.0201918	-0.0114581	-0.0156268	0.00985424	-0.00822131	0.00517539	-0.0310412
chr20_32366384_32369123:+	-0.0872752	-0.0338047	-0.0453925	-0.0384607	-0.032728	-0.0439687	-0.0537262	-0.0506484	-0.0394952	-0.0698588	-0.0258584	-0.0244225	-0.0421636	-0.0539058	-0.00880715	-0.0195827	-0.0596765	0.00731241	-0.0730991	-0.0902129	-0.0368953	-0.0213542	0.039385	-0.0218796	-0.0374579	-0.0235449	-0.0374443	-0.0703162	-0.0859066	-0.0535118	0.0291047	0.0194205	-0.012384	-0.000722824	-0.0262915	-0.0622574	-0.0237713	-0.0481033	-0.0627	-0.065952	-0.0858408	-0.0825386	-0.0257635	-0.0781183	-0.0702775	-0.0119632	-0.036828	-0.0115182	-0.0261166
chr20_33619517_33623296:+	-0.0925935	-0.0227815	-0.0557454	-0.0342349	-0.0314503	-0.0269944	-0.0450485	-0.069222	-0.0937537	-0.0612499	-0.0651561	-0.0658707	0.00385997	0.0233203	-0.0386882	-0.0370333	-0.0444759	-0.00421162	-0.0848258	0.0516643	-0.0214428	-0.0514605	0.0228239	-0.0167641	-0.0249534	-0.0420236	-0.0213564	-0.0466262	-0.0166645	0.0183001	-0.09221	0.0243905	0.00324262	-0.0522932	-0.0745884	-0.0475301	-0.0787913	-0.0586404	-0.0670752	-0.0347208	-0.0320582	-0.0649778	0.032472	-0.0404673	-0.0768909	-0.115761	-0.0517143	-0.0753434	-0.0284833
chr20_34470048_34492597:+	-0.0468568	-0.0464684	-0.0246099	-0.013317	-0.0229792	-0.0382055	-0.0221679	-0.00817529	-0.0314031	-0.00294065	-0.0428114	-0.00962424	-0.0373346	-0.0176886	-0.00860444	-0.046475	0.0333889	-0.0351428	0.0313985	-0.0178445	-0.0299735	0.0903455	-0.0324781	-0.0178601	-0.037834	-0.0411619	-0.00919166	0.0263273	-0.0487762	0.0320423	-0.0511028	-0.0214233	-0.0271905	-0.0511906	-0.0323008	0.0155155	-0.00523448	-0.0161527	-0.0255862	0.00731219	-0.0387733	0.0188629	0.00139022	0.00304743	0.0615028	0.0649058	-0.0431219	0.00191369	-0.041511
chr20_35714185_35725155:-	-0.0266565	-0.0455257	-0.114676	-0.100268	-0.0353634	0.0894476	0.0411286	-0.0397158	-0.088476	-0.104211	0.056993	-0.0463185	0.00526233	0.147481	-0.0719973	0.0062116	0.106971	0.0666795	0.0330804	-0.00107455	-0.110228	0.138864	-0.0882981	-0.103122	-0.0842245	-0.0228116	0.0187915	-0.00283048	0.162365	-0.0633049	-0.0981343	-0.0930603	-0.0253801	-0.055829	-0.0318841	-0.0627088	-0.0508645	0.161738	-0.100248	-0.0915347	0.0561796	0.0136667	0.0479082	-0.0639482	0.0491668	0.0698919	-0.0554951	-0.087932	-0.0332325
chr20_35729312_35732135:-	-0.191989	-0.039634	-0.0148966	-0.0513706	-0.12183	-0.073613	-0.102401	-0.10617	-0.115808	-0.118348	-0.141711	-0.134965	-0.0810272	-0.0926918	-0.101774	-0.00786549	-0.040086	-0.101561	-0.0838278	-0.0776141	-0.0365466	-0.0580122	-0.0501219	-0.0835142	-0.0686829	-0.0898458	-0.0279075	-0.0675046	-0.0920101	0.00199431	-0.145013	-0.0393167	-0.10157	0.0309227	-0.0930583	-0.121705	-0.10243	-0.125974	-0.126746	-0.106661	-0.103089	-0.112202	-0.0263606	0.0103033	-0.0810915	-0.0388796	-0.0614903	-0.026877	-0.0342751
chr20_38057532_38066256:+	-0.0279718	0.00407785	-0.00152432	0.0203673	0.0049413	-0.0123198	-0.0119704	-0.0130867	-0.0124642	-0.00420792	0.00754927	-0.013589	-0.00921281	-0.00221205	0.029529	-0.0233099	-0.0189425	-0.0238158	-0.019851	-0.0187896	-0.00159428	0.0308544	0.0280394	0.0156755	-0.00468382	-0.0133224	0.0150192	-0.0210438	-0.0195164	-0.0184985	-0.00533663	-0.000984325	-0.0259406	0.000932371	-0.017534	-0.00331477	-0.0191456	-0.00161667	-0.0221767	-0.0186585	-0.0220742	-0.00691325	0.0319357	-0.020486	-0.00969679	-0.0147424	0.000481442	-0.00978123	-0.030673
chr20_38983699_38994880:+	-0.0295633	-0.0138642	-0.0183442	-0.0115376	-0.0206955	-0.0211172	-0.00522952	-0.0171572	-0.0243163	-0.025166	0.00221718	-0.0145182	0.00321312	-0.0232624	-0.0183319	0.00604216	-0.0190483	0.0753692	-0.0261454	-0.0178104	0.0156308	0.00140444	0.000931804	-0.00529913	-0.00270823	-0.0222249	-0.00105749	-0.0166716	-0.0128996	7.88e-05	-0.0217585	-0.0028998	-0.0266862	-0.0218038	-0.00100447	0.00147562	0.0264312	-0.0239114	-0.0217898	-0.0169934	-0.00589856	-0.00662715	0.00215143	4.21e-05	0.00782769	-0.017245	0.00171803	0.0216682	-0.00325169
chr20_3945177_3974400:-	-0.0525711	-0.00265719	-0.0429763	-0.00238162	-0.0436681	-0.015036	-0.0416143	-0.0467985	-0.0536937	-0.0552023	-0.0516554	-0.0372222	-0.0465512	-0.031737	-0.0457518	0.0213236	-0.0258329	0.00506628	-0.00833316	-0.0193435	-0.0258649	-0.0429125	0.0209597	-0.0458067	-0.0312712	-0.044756	-0.00333151	0.00968123	-0.0388383	-0.00362962	-0.0491319	-0.0309291	-0.0260814	0.00311794	-0.0466468	0.0155734	-0.0450629	-0.0480726	-0.0506523	-0.0250824	-0.00739815	-0.0495665	-0.0408196	-0.0177844	-0.0322684	-0.0528822	-0.048176	-0.0436995	-0.0524009
chr20_41092472_41101353:+	-0.0352077	-0.0211473	-0.0505782	-0.0672182	-0.0416747	-0.0389882	-0.0619899	-0.0392076	-0.0607906	-0.0457664	-0.015361	-0.0298012	-0.048127	-0.0581546	-0.0501773	0.0139701	-0.0386111	-0.0623554	-0.0382226	-0.0613806	-0.0274188	-0.0375222	-0.0309688	-0.00751053	-0.0529231	-0.0208823	-0.0387401	-0.0457221	-0.0182001	-0.0270984	-0.0662182	-0.0236942	-0.0493411	-0.0592932	-0.0348134	-0.0484713	-0.0547475	-0.0250729	-0.0281832	-0.0313789	-0.0550452	-0.0521006	-0.0525089	-0.0486108	-0.0509185	-0.0652386	-0.0373185	-0.0607942	-0.0490787
chr20_41267463_41269083:-	-0.0453959	-0.0443132	-0.0309558	-0.0377009	-0.0454068	-0.044889	-0.0704388	-0.0526413	-0.0460279	-0.0112433	-0.0631886	-0.051368	-0.0344843	-0.0465561	-0.0608854	-0.0595794	-0.0602704	-0.0489818	-0.0604544	-0.0326419	-0.0309932	-0.0665874	-0.0419061	-0.0500957	-0.0356268	-0.0459761	-0.0453593	-0.0593645	-0.0542285	-0.0117634	-0.052652	-0.0230492	-0.0548886	-0.0625591	-0.0437267	-0.052113	-0.0685277	-0.0144717	-0.0562229	-0.0691352	-0.0701526	-0.0703687	-0.0509429	-0.0572251	-0.0694461	-0.0687092	-0.0133975	-0.0463196	-0.0705911
chr20_41533050_41551360:-	-0.00629707	-0.0230691	-0.027	-0.0137376	-0.0204883	-0.000550175	0.00411502	-0.02168	-0.0209893	-0.0228327	0.00903343	0.00186788	-0.0321775	0.00101708	-0.0292068	-0.0277173	-0.0100827	-0.0120015	-0.0100839	-0.0242136	0.00441921	-0.0117065	0.00581254	0.0211676	-0.0247514	0.0100431	0.0269314	-0.0212328	-0.0252943	-0.00224239	-0.0133721	-0.0076888	0.00281798	0.0496552	-0.00925492	-0.0165212	-0.0150126	0.1467	-0.0171301	-0.0285528	0.0167459	-0.0144236	-0.00103723	-0.0239037	0.0293259	-0.0374341	-0.00724435	-0.00437613	-0.0424759
chr20_47623911_47633636:+	-0.0137288	-0.00342595	-0.00679536	0.03762	-0.00234501	-0.0256103	-0.0212798	-0.0107265	-0.0136873	0.000354223	0.017374	0.0234627	0.00376563	0.0208579	-0.023201	0.0151723	0.0190108	0.0325365	0.0138352	-0.0166038	-0.00258003	0.0113055	0.00778962	-0.0111616	-0.0125807	-0.00996247	0.0120397	0.000395744	0.017017	-0.0108374	-0.0234274	0.0125441	0.00071586	-0.004461	0.002186	-0.00666743	0.0537585	-0.0100007	0.0197445	0.0420261	0.0152615	-0.0186215	-0.0055379	-0.000752054	0.00713312	0.00897621	-0.00597484	-0.0208329	0.0322044
chr20_48953556_48963898:+	-0.028185	0.00723228	-0.00873884	-0.0174134	-0.00198332	-0.00833047	0.00364383	-0.00563096	-0.00349885	-0.0197931	0.0156959	0.00167977	-0.00262489	-0.0113252	-0.0127662	0.0964729	-0.0132811	-0.0108144	0.0010414	-4.91e-05	0.0195346	0.0288494	-0.0104085	-0.00660303	-0.0168655	-0.0116214	-0.00847225	-0.0156522	-0.02803	-0.0051459	0.0176955	0.0139897	0.042829	0.0257545	0.00192239	-0.0240391	-0.0120173	0.0779435	0.00614121	-0.0078344	0.00585241	0.00500446	-0.02243	0.0246001	-0.0129322	0.00407949	-0.0229191	-0.0102144	-0.0187335
chr20_49135833_49166285:-	-0.0327363	-0.0299157	-0.0218674	-0.0298855	-0.0250414	-0.00844493	-0.0213185	-0.0270192	-0.00866884	-0.0402999	0.000951827	-0.021704	-0.0144437	0.0067522	-0.0286405	-0.0339424	-0.0331516	0.000299864	0.0125879	-0.0375922	-0.0356253	0.0247433	0.0387019	0.00806227	-0.0073503	-0.0309255	0.042265	-0.0243388	-0.0165355	0.00821536	-0.0122002	-0.0218949	-0.025627	-0.0260381	-0.0159706	-0.0234162	0.0129178	-0.0227258	0.00823864	-0.0304205	0.0217748	-0.0170533	-0.0257612	-0.0257657	0.051854	-0.0257868	-0.0233324	-0.0165744	0.00826413
chr20_51656938_51690819:-	-0.0116915	0.0529331	0.0109161	0.0500071	0.011114	0.032046	0.0190863	0.00746502	0.0254906	0.0411151	-0.0016323	0.058391	0.0342445	0.0365012	0.0228112	0.0100901	0.074498	0.0331304	0.0208573	0.0189665	0.0502918	0.0238676	0.0577081	0.12227	0.0599164	0.00593171	0.0477992	-0.0152858	0.023097	0.0379663	-0.0065614	0.0330442	0.06124	0.0118573	0.0299774	0.0595002	0.0064152	0.00564569	0.0148993	0.00760386	0.025055	0.0202854	0.0226508	0.0393097	0.0130503	-0.00244143	-0.000133677	0.0239435	-0.003333
chr20_51674153_51690819:-	0.0352766	0.0259976	-0.000339374	0.00102714	0.0239059	0.054194	0.00806438	0.0201674	-0.00318206	0.0396261	0.013892	0.0240127	0.00610682	0.0602374	0.0103303	-0.00182062	0.00466597	0.0241853	0.0719874	0.0194977	0.00700169	0.00187796	0.0030581	0.121416	0.0105326	0.0243658	0.00849105	-0.0057236	0.0392127	0.0412301	-0.00894391	0.0408412	0.0280742	0.0010238	0.00882821	0.050314	0.0416028	0.0485825	0.00855211	0.0761944	0.00737621	0.01221	0.0195575	0.0247544	0.0325056	-0.00687628	-0.00521262	0.0245397	0.027747
chr20_58438945_58441083:+	0.00642976	0.0249516	0.01372	0.0207666	0.0252284	0.049765	0.0133611	0.0231232	0.0328907	0.0377789	0.030309	0.045418	0.0273015	0.0334791	0.0167005	0.0744776	0.0412624	0.0122265	0.0396984	0.0363318	0.121397	0.0501043	0.045075	0.0308286	0.0279249	0.0179154	0.024593	0.00583151	0.0685353	0.0622789	0.0246819	0.0388888	0.0227106	0.0422657	0.0252538	0.0455274	0.0404018	0.0552612	0.0312948	0.0401727	0.0218414	0.0333124	0.0366971	0.0256648	0.0464313	0.0111186	0.0131498	0.0447236	0.0300324
chr20_59840369_59841535:+	0.0170854	0.0225074	0.0177509	0.020354	0.0301377	0.0080074	0.0376158	0.0127999	0.035063	0.00735265	0.0106663	0.0264103	0.0319544	0.00807564	0.000225474	0.00824165	-0.00249014	0.0562887	0.0376855	0.0227431	0.0030591	0.098647	0.00940718	0.0212285	0.0155124	0.0130058	0.0157745	0.0208048	-0.0145749	0.0167333	-0.011939	0.00953734	0.00225129	0.041943	0.00717131	0.0567655	-0.00150022	0.0541184	0.0197542	-0.000688621	0.08119	0.00574663	0.0439427	0.0555111	0.0111052	0.0377522	0.0371425	0.00316025	-0.0121586
chr20_62139075_62140944:-	-0.0615042	0.0226342	-0.0262361	-0.103196	-0.0476085	-0.0387992	-0.0809444	-0.037985	-0.0425634	-0.0287458	-0.0658051	-0.0803269	-0.0516176	-0.0986977	0.0189024	-0.04678	-0.0723458	-0.0669764	-0.077707	-0.0561058	0.00708344	-0.0429333	-0.00461489	-0.086585	-0.00952882	-0.0569124	-0.0468078	-0.0966591	-0.0667178	-0.00212169	-0.0548893	-0.0233266	-0.0220607	-0.0684103	-0.0638067	-0.0409925	-0.00991736	-0.0629867	-0.0765297	-0.0788313	-0.0830206	-0.0349899	-0.0455981	-0.0295229	-0.0660372	-0.0210148	-0.0381394	-0.0644089	-0.0432914
chr20_9557608_9566384:-	-0.0267726	-0.0172822	-0.0111046	-0.00873037	-0.0131363	-0.0134589	-0.0109928	-0.0223898	-0.00741793	0.0254161	-0.0321614	0.00065759	-0.0127253	-0.0154144	-0.0324012	0.024555	0.00277161	0.0293656	-0.0179801	-0.0215262	-0.00241201	0.00761297	0.00788512	0.0159597	-0.0188944	0.000216977	-0.0137755	-0.01755	0.0463579	-0.0216416	-0.0234772	0.0186095	-0.0240481	-0.027807	-0.0292648	-0.00723736	-0.0216928	-0.00698094	-0.022558	-0.0164904	-0.0317269	-0.0191316	-0.00785246	-0.00743419	0.0417219	-0.0201809	-0.010442	-0.0330596	0.0159212
chr21_15014344_15043574:-	-0.00471364	-0.00637042	-0.00536573	0.0309475	0.00131221	0.00247972	-0.00246423	0.00497207	0.00233529	-0.019681	0.00115245	-0.00267267	-0.00755534	0.0363476	0.0288534	0.0139557	0.0330485	0.0166979	-0.0286064	-0.0139383	0.0278323	0.00285944	0.0135743	-0.0183151	-0.00589246	-0.0176381	0.0220378	-0.0105995	0.034245	-0.0127859	-0.00867226	-0.0109128	0.0151214	-0.0169822	-0.00179379	-0.0190055	-0.00763314	-0.0216377	0.0151229	-0.00438594	0.0125333	-0.0099333	0.00587703	0.0321241	0.000407298	-0.00425141	0.0295727	-0.00249515	-0.0246302
chr21_15762891_15766141:+	0.0331134	0.0192691	0.0113601	0.0273288	0.0308749	0.00359928	0.0401306	0.0313649	0.0671216	0.000780115	0.0132312	0.0484998	0.0257115	0.0483293	0.00646709	0.0105149	0.0188171	0.0394782	0.0336678	-1.17e-05	0.0190178	0.0612298	0.0152887	0.0134287	0.020754	0.0419163	0.0204238	0.00010859	0.0476754	0.0101649	0.0254096	0.0286476	0.0521094	0.0406576	0.00802539	0.0301064	0.0186736	0.0542635	-0.00549571	-0.00732779	0.107152	0.0198961	0.0155989	0.0182193	0.0187075	0.0539992	-0.000501961	0.0286758	0.00894748
chr21_21280578_21292241:+	-0.0224791	-0.0298244	-0.0183627	0.0125785	-0.0143357	-0.00177449	-0.0105813	-0.00823899	-0.0156086	-0.0367385	-0.00091815	-0.00726748	-0.0283715	0.00926818	-0.0281415	-0.0360581	-0.0276686	0.0273682	-0.0319296	-0.0333087	-0.0148547	-0.0250922	0.0252397	0.00159792	-0.0239517	0.00481608	-0.00295566	-0.0266708	-0.0247235	0.00791982	0.0064727	-0.0223944	-0.0287717	-0.0256495	-0.0232651	-0.0204373	-0.00909468	0.00309359	0.00273863	-0.0243534	-0.0105784	-0.0212374	-0.0278357	-0.0160151	0.0181161	-0.0218083	-0.0157592	0.00334831	-0.018787
chr21_29321221_29329693:+	-0.0135264	0.0303437	-0.130999	-0.00861172	-0.0214873	-0.110938	-0.186302	-0.0595856	-0.0964695	-0.0373752	-0.0477455	0.0813674	0.0661193	0.158526	0.0364029	0.0353278	0.144098	0.0985332	-0.0751144	-0.140279	-0.0629815	-0.0233015	0.150124	0.0100781	0.00365835	-0.0899541	0.0583218	0.00427699	0.0423186	0.0492527	-0.40122	0.00233966	0.0185846	0.0234713	-0.0272859	-0.020763	-0.0803678	-0.18767	-0.0397107	0.0656306	-0.0473134	-0.054171	-0.0208943	-0.00140327	-0.0747677	-0.121206	-0.0607701	-0.0598053	0.0156086
chr21_31164962_31195305:-	-0.0217432	-0.052042	-0.133662	0.021319	-0.025197	-0.0364229	-0.0564907	-0.0321346	-0.0513073	-0.0176484	-0.0343844	-0.0381998	-0.0420445	-0.0402991	0.00229858	-0.0642647	0.0317381	-0.0229625	-0.0347156	-0.0404607	-0.011748	0.00966936	0.0336595	0.0036923	-0.00939333	-0.0348844	0.0174353	0.00447866	-0.0198528	-0.0144685	-0.0406421	0.0338761	0.00886541	-0.0119388	-0.00912286	0.0224919	-0.0214686	-0.0130106	0.00875613	-0.0197722	-0.0128804	-0.00592012	-0.00970689	-0.0136206	0.0167175	-0.0270236	-0.0276364	-0.00153862	0.0119302
chr21_31182421_31203012:-	-0.00951371	0.0243835	-0.0710088	0.0134092	0.0499972	0.00995384	-0.00886609	0.027707	0.0333274	-0.00108875	0.0163702	-0.0163633	0.0284837	0.0413199	0.0565617	0.00066655	0.0440366	0.055164	0.0049491	0.0149227	0.0140969	0.0645921	0.0369462	0.0261719	0.00756081	0.0287772	0.0159067	0.0929717	0.0430198	-0.00651099	0.040683	0.0334613	-0.0139285	-0.00427265	0.00879094	0.0654587	0.00325058	0.02662	0.0298266	0.00598284	0.050447	0.0336401	-0.0029355	0.0046792	0.0538032	0.0209154	0.037687	-0.0056994	0.0208075
chr21_36247517_36248568:+	-0.142384	-0.106313	-0.34562	-0.174556	-0.122503	-0.197219	-0.125669	-0.177972	-0.122764	-0.207482	-0.149679	-0.0819595	-0.131263	-0.161313	-0.151167	-0.130718	0.00970116	-0.156142	-0.137187	-0.154238	-0.153488	-0.0491289	-0.11737	-0.164172	-0.159298	-0.164193	-0.124313	-0.0158073	-0.152799	-0.161303	-0.144368	-0.110701	-0.133027	-0.157031	-0.151867	-0.0271502	-0.169046	-0.103432	-0.175311	-0.186601	-0.194654	-0.158924	-0.230753	-0.149085	-0.114021	-0.138276	-0.120927	-0.178744	-0.21413
chr21_39206108_39212707:-	0.0414554	0.0512495	0.00533205	0.035865	0.00828097	-0.0110189	-0.0168738	0.00138867	-0.00707706	-0.00255644	-0.0113525	0.0152344	0.000323154	0.0408103	-0.000872415	0.00235002	0.022623	-0.0160491	0.00957375	-0.0199269	0.0335659	0.0205332	0.0425964	0.0768562	-0.0116315	-0.0103038	0.00698745	0.00838981	-0.0119408	-0.00924433	-0.0068998	0.0115246	-0.00306833	-0.0144533	-0.00224853	-0.00263869	0.00243939	-0.00581661	0.0001314	-0.00510984	0.0140701	-0.0118485	-0.017121	0.00320158	0.0131553	0.0417821	-0.0104361	0.00324035	0.0112114
chr21_39206108_39229436:-	0.0235948	0.00109495	-0.00807565	-0.0243329	-0.0221035	-0.0100892	-0.0243743	-0.0331493	-0.0346475	-0.0198515	-0.0166521	-0.0036963	-0.0213794	0.022063	-0.0298582	-0.0115335	-0.0346265	-0.0217201	-0.0258923	-0.0149199	-0.00290611	-0.0293114	-0.00967015	0.0143301	-0.0175946	0.00424401	-0.0178782	-0.0262786	-0.0167689	-0.00488043	-0.0369339	-0.0134368	0.00874119	-0.0304916	-0.0303996	0.00112886	-0.0284629	-0.0216759	-0.0292255	-0.0251924	-0.0256133	-0.0274806	-0.0211029	-0.0186164	-0.0196442	-0.0373621	-0.0173956	-0.017122	-0.0173269
chr21_45128402_45134832:+	0.0086617	-0.0442866	-0.0582523	-0.0472856	-0.0352953	-0.0505063	-0.0512634	-0.0349456	-0.0128466	-0.00887289	0.0268936	-0.0146896	-0.0173739	0.0894654	-0.00604036	-0.00799016	0.0705014	0.0197974	-0.042943	-0.0467365	0.0206688	0.0474011	-0.0218628	0.00524458	-0.0259108	-0.05184	0.0741611	0.0368383	0.0582938	-0.062355	0.00335842	0.0157213	0.0543348	0.0217371	-0.0261822	0.0288916	-0.0236264	-0.0348031	0.0275142	-0.00123969	-0.0157739	0.0029476	-0.0273684	0.00636601	-0.0106525	0.0288794	-0.00057298	0.00559568	-0.0433336
chr22_17044873_17047426:+	0.00444701	0.0176962	0.0101045	0.043688	0.000879802	-0.0059752	0.0314463	-0.00801304	-0.000785475	0.0500765	0.039761	0.0178808	0.0037869	-0.0165511	-0.00598997	0.0230205	0.0181816	-0.0329303	-0.00473709	-0.0153297	0.0280071	0.0236808	-0.000241835	0.0346307	0.00559481	-0.00310238	0.012038	0.0385065	0.00547544	-0.0226403	-0.00452924	-0.00418416	-0.00937296	-0.00584807	0.00155223	0.0333055	0.00922268	0.0424614	-0.00239522	0.00146338	0.00782116	-0.00358512	0.00158317	-0.00383811	0.0121246	0.00406599	-0.0188995	0.00430862	0.0108165
chr22_20933779_20934244:+	-0.0874232	-0.110287	-0.121033	-0.00735573	-0.1267	-0.0736784	-0.0860444	-0.0984055	-0.0798206	-0.083627	-0.134513	-0.0873386	-0.128496	-0.0932564	-0.0726286	-0.117179	-0.0762317	-0.0254301	-0.0454145	-0.10358	-0.107678	0.0172073	-0.144481	-0.0783161	-0.130144	-0.100442	-0.0669074	-0.1002	-0.080564	-0.0941454	-0.119706	-0.100089	-0.0882468	-0.12385	-0.1046	-0.00700916	-0.0916944	0.0459967	-0.0517099	-0.065082	-0.0883289	-0.131514	-0.0897349	-0.0664053	-0.007848	-0.113735	-0.0972501	-0.105446	-0.0998458
chr22_24302195_24313466:+	-0.0419632	-0.0162816	-0.0154724	-0.0238974	-0.0286193	0.0143521	-0.00272859	-0.0111812	-0.0237489	-0.017309	0.000888822	0.0169767	-0.0154289	-0.0221267	-0.00868491	-0.0149293	0.035346	-0.013678	0.0231227	-0.0212525	-0.0241033	0.0120678	-0.0112932	-0.0214817	-0.00929728	0.0223575	0.0176301	-0.00477215	-0.00928534	-0.0160118	-0.0227295	-0.00936628	0.0284157	-0.0278106	-0.0196465	0.00554727	0.0303475	0.0598716	0.00887463	0.0142361	-0.0259317	-0.03164	-0.0251781	0.0087582	0.00584055	0.0362267	-0.00550693	0.00507634	-0.0255552
chr22_24302195_24369320:+	0.0125384	-0.00952772	-0.0098737	-0.00175511	0.0120011	0.0413089	0.00425493	-0.000826027	-0.0158696	0.0233824	-0.000570506	0.0283087	0.0286162	-0.0127289	-0.0119927	0.058726	0.00342343	-0.0160374	-0.000834128	-0.0219677	0.0318158	-0.0133556	0.00321539	0.00954286	-0.00440847	-0.0103042	-0.0101396	-0.0121031	-0.00778325	0.029085	-0.0215509	0.00725252	-0.00538061	-0.0107555	-0.0112598	0.00709388	0.0226749	-0.00885439	0.0106473	-0.018706	0.0402232	-0.00426058	0.0101664	-0.00252063	0.0485692	-0.0068836	0.00479759	0.0149305	0.0181707
chr22_27894555_27914347:-	-0.0165019	0.0246668	0.000856758	-0.0171604	0.00922275	0.0560982	0.00395357	-0.0102244	0.00229546	-0.0195263	-0.0181813	0.0155451	-0.00470794	0.0171136	0.00952276	-0.0138211	0.017248	0.0210892	0.0122035	-0.0186415	0.0285101	-0.0112308	0.0441947	0.0478795	0.0254515	0.00281822	0.0241872	0.00283328	-0.0017028	0.036162	-0.00344179	0.0333272	-0.000601318	0.0400086	-0.0071671	0.0144426	-0.0203121	-0.0147626	-0.00745737	0.0424285	-0.000454642	-0.00252261	0.0268947	-0.0045948	0.000760699	0.0247778	-0.00874295	0.00809632	0.0545451
chr22_28296198_28297852:-	-0.0409074	-0.0364555	-0.0325534	-0.0168414	-0.0185999	-0.0120274	-0.0420953	-0.0427435	-0.0316893	-0.0291813	-0.0471937	-0.0320272	-0.0380116	-0.0496005	-0.0533873	-0.0220803	0.0128229	-0.00122515	-0.0437806	-0.0516673	-0.0148809	0.0148094	-0.0182393	-0.0302676	-0.0272476	-0.0456498	-0.0161868	-0.0291767	-0.0203002	-0.036547	-0.0493817	-0.0300651	-0.0348339	0.00973661	-0.0407387	-0.0372642	-0.00178837	-0.0350238	-0.0404107	-0.00330323	0.0163581	-0.0446908	-0.0294302	-0.0205206	-0.0248247	-0.0233688	-0.0342595	-0.0421909	-0.0155163
chr22_32478981_32479275:+	-0.24797	-0.0878862	-0.165619	-0.103444	-0.250208	-0.228014	-0.17985	-0.20346	-0.164104	-0.207491	-0.0875888	-0.134721	-0.177805	-0.241217	-0.240477	-0.185758	-0.0253012	-0.121173	-0.265075	-0.241978	-0.137128	-0.0797527	-0.188896	-0.211274	-0.204822	-0.153412	-0.174394	-0.0603144	-0.209366	-0.148854	-0.208184	-0.155056	-0.098998	-0.184338	-0.234389	-0.151014	-0.138377	-0.0762774	-0.181673	-0.220463	-0.114784	-0.212101	-0.177937	-0.0920122	-0.165301	-0.086326	-0.0452657	-0.194779	-0.156167
chr22_32478981_32485209:+	-0.00689756	0.0145065	-0.00150677	-0.0152901	-0.00870539	-0.00859427	-0.00329066	-0.000692868	0.0170134	0.00540268	-0.0136892	0.0154899	-0.00413086	0.00705411	-0.00676661	-0.0112051	0.0251806	0.0438389	-0.0130395	-0.0108704	0.00421536	0.0286199	0.0116507	0.0272343	-0.00922222	0.0239198	0.0163641	-0.00537162	0.000962298	-0.00791963	-0.0142511	-0.00966891	0.0266184	-0.00481415	0.0216614	-0.00505813	-0.011912	-0.00642368	-0.0123359	0.0291156	0.0248344	-0.011671	-0.0140458	-0.000388876	0.00806974	0.00335149	0.0122889	-0.0147487	-0.00121634
chr22_38494630_38501280:-	0.00210848	0.0181809	-0.0632128	0.00654727	-0.0574241	0.00799079	-0.034044	-0.0188505	0.00329268	-0.0231142	-0.0453331	0.00101746	-0.000436683	-0.048065	0.0299201	-0.0364146	-0.00271683	-0.0430766	-0.0139751	-0.0333904	0.014077	0.0147334	-0.0044357	0.0464292	0.0212915	-0.0170852	0.0109034	0.0110501	0.0104361	0.0100462	-0.0274776	-0.0368821	0.00422694	-0.00787685	-0.0102621	0.018642	-0.039361	-0.025899	-0.0485589	-0.0383961	0.00417848	-0.0328041	-0.0270235	-0.00262417	-0.00951883	-0.00626957	-0.0262548	-0.00999187	0.0104107
chr22_40117055_40156182:+	0.12786	0.117732	0.148651	0.203365	0.197858	0.218571	0.173056	0.131416	0.120672	0.17956	0.192619	0.194367	0.175893	0.235377	0.0950177	0.124252	0.169755	0.177134	0.195569	0.182578	0.244629	0.160836	0.259384	0.109419	0.214014	0.125678	0.219072	0.133793	0.0886077	0.08417	0.0897714	0.196253	0.264468	0.166919	0.123072	0.128628	0.226715	0.129009	0.18728	0.215038	0.117627	0.15117	0.178482	0.18567	0.169262	0.187878	0.182975	0.0903173	0.22228
chr22_45689712_45718493:+	-0.0106847	-0.0120995	0.00731095	0.0041932	-0.0100823	-0.00788005	-0.00710159	0.0138802	0.00766215	-0.00832642	0.0094003	0.0176243	0.00385024	-0.0108665	-0.0109187	-0.00735617	0.0239044	0.00851782	0.0462249	-0.00767466	0.0360151	-0.0150983	0.0363814	0.0111265	-0.00402371	0.00790401	0.00819853	0.0313116	0.0349998	0.00758395	0.0245243	-0.0120166	0.0411105	0.0347249	0.000606423	-0.0123692	-0.013262	0.0122738	0.00124684	0.0290078	0.0126611	-0.0119447	0.00232282	0.00539519	-0.00973021	-0.00299365	-0.00353328	0.0226622	0.0141642
chr22_45689712_45740538:+	-0.0248119	-0.015122	-0.0406428	0.00521297	-0.00159779	-0.0372113	-0.0286744	-0.0211208	-0.0215347	0.0137749	-0.0260684	-0.0294857	-0.0163863	-0.00414993	-0.0482668	-0.0224815	-0.0477452	-0.00720017	-0.0302293	-0.0362672	-0.00149085	0.0273999	0.00634967	-0.0383094	-0.0394015	-0.0262219	-0.00565606	-0.00264216	-0.0436681	-0.0364	-0.0195867	-0.0350137	-0.0209603	-0.0480459	-0.0352709	0.0412679	-0.0356298	-0.0367086	-0.036132	-0.0434279	-0.039911	-0.0334029	-0.00835245	-0.0100712	-0.043654	-0.00200708	-0.0292645	-0.0211498	-0.031298
chr22_45700282_45740538:+	-0.0297207	-0.00911211	-0.0207801	-0.0405873	-0.0123119	0.0456233	-0.021454	-0.0182324	-0.0152845	-0.0357401	0.0424611	-0.00918016	0.0355878	0.0654627	0.0107806	0.0218964	0.00210888	-0.00485834	0.0217484	-0.00872695	0.029946	0.0226352	0.0468282	0.0169553	0.00139243	-0.0304516	0.0618288	-0.0124876	0.0895118	0.0255765	0.0167786	0.0613484	-0.00359881	0.0183724	-0.0181666	0.0307164	-0.00822852	0.0168223	-0.0110791	-0.014625	-0.0355038	-0.0225937	0.00848339	0.0030095	0.0306785	0.0187663	0.0165938	0.00671387	-0.0114879
chr22_45729425_45740538:+	-0.103843	-0.145337	-0.12869	-0.152681	-0.0881605	-0.114396	-0.0970341	-0.114715	-0.101841	-0.10662	-0.100384	-0.157728	-0.120687	-0.04011	-0.174584	-0.128341	-0.11106	-0.0928843	-0.117811	-0.134358	-0.0129997	-0.0702424	0.0285075	-0.161697	-0.114932	-0.152501	-0.0984024	-0.0916103	-0.044908	-0.0954635	-0.138211	-0.0707122	-0.08597	-0.0782925	-0.141844	0.0128309	-0.162775	-0.0387908	-0.12431	-0.108334	-0.112088	-0.136266	-0.120083	-0.100958	-0.0371419	-0.115061	-0.0484462	-0.0955886	-0.199398
chr22_50372020_50394135:+	-0.0380326	-0.0216585	-0.0370492	0.0387766	-0.0427479	0.0167225	-0.0838883	-0.0509967	-0.0696769	-0.0515589	-0.0736188	-0.0564154	-0.0390129	0.0090582	-0.0967688	-0.015215	-0.0453174	-0.057278	-0.00360627	0.0164938	0.0146808	-0.0675398	0.0771485	-0.00586842	0.0294916	-0.0330284	0.0115942	-0.0838684	-0.0725416	0.00817925	-0.0645569	-0.0304891	0.0504047	-0.0701651	-0.0754474	-0.0520483	-0.0578668	-0.0588329	-0.0460201	-0.0664805	-0.0307003	-0.0701836	0.00438915	-0.0595101	-0.0622991	-0.0622563	-0.0526601	-0.0647699	-0.0422256
chr3_107710452_107733023:+	0.0010278	-0.0121938	-0.00688994	0.0158427	-0.00650478	0.00817204	0.00268503	0.000850842	-0.00637791	0.00474309	0.00537347	-0.00586494	-0.0119646	-0.0147796	0.00722199	-0.0129741	0.00352886	-0.00138245	0.0227307	-0.010278	-0.0217585	0.0341057	0.016075	0.00659492	0.00992161	-0.0026094	-0.0118655	0.00064131	-0.0146594	0.00566163	-0.00942762	0.0146484	-0.0140229	-0.019017	-0.0111367	0.0193422	0.0210435	-0.0188349	-0.00353411	0.0205274	-0.022136	-0.0177793	-0.00966674	0.00433705	-0.0181792	0.00956801	-0.0165176	-0.0141352	-0.0223593
chr3_108191521_108214021:-	0.0015826	-0.0146071	0.00144117	0.00659009	-0.0144258	-0.0111815	-0.00300186	-0.00608524	0.00442076	-0.0134362	-0.0260675	-0.00716303	0.0245889	-0.0150198	0.0139401	-0.00944317	-0.0129218	0.0291153	-0.0125217	-0.000436939	-0.0141102	0.0297667	-0.0117147	-0.00711933	-0.00734734	-0.0170859	-0.018135	-0.00521216	-0.0175701	0.00276885	0.00756474	-0.00981497	0.0053237	-0.0131362	-0.0140205	0.0174599	0.0466542	0.0227394	-0.00187511	0.00914211	0.00201845	-0.0146398	-0.0093664	0.0210978	0.000642958	-0.00236662	-0.0053353	-0.0128434	-0.0254352
chr3_108647943_108672656:+	-0.0833874	-0.102644	-0.0945798	-0.0195577	-0.0577694	-0.10241	-0.0870013	-0.0802542	-0.0814274	-0.0981846	-0.100348	-0.0989927	-0.0818389	-0.0846313	-0.0909167	-0.027071	-0.0882683	-0.0807459	-0.0993476	-0.0696226	-0.106784	-0.0710871	0.0137985	-0.0685789	-0.0584466	-0.085478	-0.0381002	-0.10401	-0.0995558	-0.0836622	-0.0966098	-0.0593008	-0.059078	-0.0918013	-0.0663683	-0.0737064	-0.106562	-0.0794363	-0.0612117	-0.00181595	-0.0869323	-0.108192	-0.0438324	-0.0791596	-0.131233	-0.120621	-0.0514886	-0.103546	-0.0409563
chr3_111112030_111126335:+	-0.0156969	-0.0416556	-0.0315734	-0.0549733	-0.0369509	-0.0203856	-0.0380414	-0.0360144	-0.0473395	-0.0299385	-0.0485699	-0.0245177	0.0151723	0.0265048	-0.00202647	0.0194596	-0.0184449	-0.0590659	-0.0293973	-0.041139	-0.0222409	-0.0465458	0.0161311	-0.0183733	-0.0391387	-0.0444802	0.0421589	-0.0160636	-0.0586234	-0.0116453	-0.0483349	0.0141678	0.00775526	-0.0464262	-0.0147464	-0.028283	-0.0474424	-0.0391139	-0.0439801	-0.0121584	-0.0602657	-0.0230194	0.026968	-0.0462067	-0.0528757	-0.040829	-0.0321895	-0.033693	-0.0113801
chr3_111112030_111147484:+	-0.0417706	0.000158524	-0.0301769	-0.0531817	-0.0288996	-0.0319549	-0.0314967	-0.041135	-0.0339298	0.0198032	-0.0378401	-0.0367724	-0.00869822	-0.0549113	-0.0400148	-0.0225976	0.0679281	-0.0393823	-0.0143991	-0.0353163	0.0073878	-0.0439286	-0.0193248	-0.0381928	-0.0061916	-0.0106457	-0.0110749	-0.040845	-0.0492493	-0.0422384	-0.0384592	-0.0176184	0.0455927	-0.0216949	-0.0380497	-0.0395794	-0.0200514	-0.0395684	-0.0273081	-0.0368593	-0.0211207	-0.00919988	-0.01626	-0.025337	-0.043146	-0.0365911	-0.0265511	-0.00655801	-0.0486293
chr3_113664313_113674896:-	0.00841112	0.0128946	0.014602	0.0167169	0.014002	0.0250329	0.0173665	0.022828	0.0242991	0.0263515	0.0326117	0.0122821	0.0356094	0.00240495	0.00724672	0.0318545	0.0400201	0.0468759	0.0326334	0.0257033	0.0174172	0.0241573	0.0388774	0.00942519	0.00650175	0.0332064	0.0383605	0.00647577	0.0141379	0.00807846	0.00421159	0.0253236	0.0161679	0.0111453	0.0215169	0.108486	0.032153	0.0107497	0.0303614	0.00389631	0.0226171	0.00519381	0.0299307	0.0289487	0.00630176	0.0389736	0.00980332	0.0340224	0.0131888
chr3_114350274_114351878:-	0.0664245	-0.00631253	-0.0178711	0.0128184	-0.0127277	0.0352017	0.00452834	0.0102536	0.0302803	0.0390915	0.0493132	0.0235955	0.00789536	-0.00375116	0.00727198	0.04923	0.0183023	0.0209844	0.0263963	0.00120864	0.0194144	0.0294087	0.0204238	0.00349631	0.0115942	0.0397061	0.0222507	0.0413983	0.032044	0.0373472	0.0112567	0.0204397	0.0283159	0.000241764	0.00961214	0.0115559	0.036512	0.0531034	0.000700909	0.0360883	0.0114461	-0.0101852	0.0210015	0.0323382	0.0100978	-0.0296726	0.0399128	0.0195719	-0.00626361
chr3_119503532_119517315:+	0.03406	0.00830212	-0.0168781	0.03416	-0.013999	-0.0321692	-0.0250224	0.00458746	-0.0144524	0.0545805	-0.0240826	-0.0167177	0.00407565	0.0434905	-0.0345361	0.0183657	-0.0235277	0.00149198	-0.0166243	-0.0272034	-0.0270748	0.0103972	0.0632952	-0.0338283	-0.0172863	0.0424462	0.000331582	-0.0123416	0.0071282	-0.00727907	-0.0311024	0.0255414	0.0501103	0.00317866	-0.0218411	-0.00804602	0.0319515	-0.00815074	0.00365117	-0.0116797	-0.0154146	0.00944616	0.0457122	0.00741145	-0.00224216	0.00386533	0.0360755	-0.0126949	-0.0111723
chr3_119863419_119905852:-	-0.0231255	0.00608336	-0.0273414	0.0132835	-0.018244	-0.034839	-0.0304934	-0.0060657	-0.0208709	-0.0329156	0.0405487	-0.00263509	0.00929835	-0.0310179	0.014571	-0.0256994	-0.0105763	-0.0199135	-0.0285297	-0.0274666	-0.0306167	-0.0030663	-0.0372242	-0.0125679	-0.0226864	-0.0018727	-0.0130249	0.0216513	-0.0215553	-0.020171	0.00171113	-0.0259084	-0.0132513	-0.0205175	-0.0232208	-0.0120187	-0.00806716	-0.0168208	0.00223255	-0.0224798	-0.024708	-0.0220587	-0.0123796	0.0158173	0.000145249	-0.0217576	-0.0116761	-0.0030507	0.0230871
chr3_121152477_121240507:+	-0.037787	-0.0216314	-0.0423107	-0.0441269	-0.0233711	-0.0302782	-0.0308229	-0.0456321	-0.00944323	-0.00545744	-0.0232718	-0.0133247	-0.0404545	0.0127666	-0.0425348	-0.0411587	0.0443231	-0.0276548	-0.0334185	-0.0494317	-0.0379801	-0.0130376	-0.0324782	-0.0287153	-0.045569	-0.0192392	0.0206624	-0.0155562	-0.0340178	-0.0280128	-0.0502895	-0.00199432	0.000746432	-0.0501014	-0.023912	-0.0308573	-0.043898	0.0384752	-0.0117756	-0.0210903	-0.0337727	0.000575221	-0.00803928	0.0133999	0.00340077	0.0035885	-0.0201997	-0.0130806	-0.00617088
chr3_121279805_121318540:+	0.0109269	0.0104824	-0.0110272	-0.0137586	-0.00485253	0.00667556	-0.00393704	0.00182994	-0.0041613	0.00694711	-0.0158319	-0.0021517	-0.00681054	0.0265883	0.0194915	-0.0103119	-0.0124663	-0.0154561	0.00892886	-0.00917972	0.00289521	0.00965373	0.0155895	0.0221933	0.0233576	0.00494604	0.00404397	-0.000327958	0.0230016	-0.0099969	-0.0116241	0.00556193	-0.00686989	-0.0069647	-0.0117455	0.0295953	-0.0109229	0.0163428	-0.0115581	-0.0115716	0.0256266	-0.0122072	0.0123208	0.00931616	0.00723845	-0.00389255	0.0327794	-0.012906	-0.0015557
chr3_121378716_121381532:+	-0.0605112	-0.0261628	-0.110862	-0.0559856	-0.0407171	-0.117673	-0.0105027	-0.0542784	-0.0582685	-0.0713292	-0.0963501	-0.0732011	-0.0423648	-0.075987	-0.0708404	-0.0554421	0.00470851	-0.0338655	-0.0576741	-0.0310849	-0.0828581	0.0379177	-0.0715106	-0.0888691	-0.0463481	-0.068141	-0.0360911	0.0092981	0.0676659	-0.0320868	-0.0618855	-0.0451962	-0.102375	0.0238483	-0.0572004	-0.0837047	0.0175626	-0.0492971	-0.0620692	-0.0355568	-0.0805721	-0.107565	-0.0711261	-0.0597103	-0.0573557	-0.0317145	-0.0358596	0.0290603	-0.0585586
chr3_125313308_125331238:-	-0.0887409	-0.129834	-0.130063	-0.166831	-0.125979	-0.123444	-0.184043	-0.158223	-0.161033	-0.114443	-0.181082	-0.158413	-0.0939639	-0.0298025	-0.0831611	-0.133204	-0.107811	-0.197537	-0.0997947	-0.0863556	0.0423638	-0.156446	-0.0178999	-0.128246	-0.119896	-0.153924	-0.0536909	-0.0626312	-0.145499	-0.0724015	-0.142017	0.0350905	-0.129065	-0.14527	-0.0502699	-0.134296	-0.114939	-0.14742	-0.178115	-0.153921	-0.00580925	-0.142774	-0.0856981	-0.103762	-0.0400377	-0.158033	-0.12155	-0.13439	-0.126848
chr3_129827803_129832826:-	-0.0017924	0.0575613	0.0113524	0.021957	0.0472817	0.0326637	0.0261677	0.00172159	0.0151139	0.0696802	0.00377745	0.0216102	0.0432295	0.0234652	0.0220314	0.00737585	0.0211653	0.0200767	0.0155352	0.0433093	0.0373902	0.068788	0.0742321	0.00272586	0.012851	0.0315893	0.0329614	0.0157672	0.0414241	0.0437427	0.00465853	0.0302211	0.0279863	0.0251414	0.0018752	0.0392428	0.0318047	0.00134041	0.0169769	0.0023552	0.0646778	0.00344846	0.0416596	0.029132	0.0657967	0.0248462	0.00423495	0.0263562	0.0171946
chr3_129880309_129880559:-	-0.00756031	0.0203021	-0.0513695	-0.0302306	-0.0433373	-0.0466931	-0.0316156	-0.0244309	-0.0203123	-0.0287841	-0.0351526	-0.0283858	-0.0337549	-0.00621028	-0.0157164	-0.0454951	-0.010077	-0.0423137	-0.0502456	-0.0334078	-0.0267077	-0.00911566	0.00911202	0.0128265	-0.041512	-0.0397044	-0.02292	-0.0390108	-0.0124319	-0.0378373	-0.0319139	-0.0139826	-0.0140901	-0.0453613	-0.0362937	-0.0365812	-0.0143744	-0.0158045	-0.0441315	-0.0444017	-0.025189	-0.013319	-0.0249566	-0.0173435	-0.012993	-0.0473925	-0.0202976	-0.0470231	-0.0445225
chr3_130930416_130941699:+	0.0080923	0.0259195	0.0357153	0.0425698	0.0455503	0.0291798	0.0197676	0.0179092	0.0313035	-0.00383884	0.0423096	0.0380332	0.0490378	0.00379293	0.0030808	-0.000164738	0.00464396	0.0238333	0.011392	0.0180694	0.0381965	0.0503849	0.049371	0.0337826	0.0563337	0.0181572	0.0349667	0.0486054	0.0655365	0.0804729	0.0623746	0.0256199	0.0154494	0.0196731	0.0242246	0.0125886	0.0722981	0.00979262	0.00226739	0.00301438	0.0302866	0.0145475	0.0268895	0.0283917	0.0329807	0.0551965	-0.00346896	0.0128554	0.0114622
chr3_134188837_134195182:-	-0.0910563	-0.0702207	-0.107183	-0.0919779	-0.090962	-0.152034	-0.0877065	-0.0926619	-0.119773	-0.0510724	-0.0643553	-0.0704517	-0.0473215	-0.0433177	-0.0919183	-0.0488856	-0.0731592	-0.0606484	-0.0579712	-0.0315757	-0.0688119	0.0310282	-0.0198665	-0.0346447	-0.0560111	-0.0650541	-0.0347926	-0.0914023	-0.0975603	-0.0673755	-0.117583	-0.0280567	-0.0801537	-0.0908681	-0.0864949	-0.102738	-0.0560636	-0.106755	-0.0592334	-0.0557014	-0.0644036	-0.0905841	-0.0542795	-0.0741839	-0.0665688	-0.109551	-0.0318951	-0.0327212	-0.115466
chr3_138570318_138572932:-	0.1136	0.0810632	0.0274692	0.0259834	0.0334477	0.0593624	0.0361711	0.0165031	0.0234582	0.063448	0.0477265	0.00297816	0.0213375	0.00285624	-0.0173557	-0.0221696	0.0213185	0.0688458	0.0267708	-0.00831076	0.123652	0.0397382	0.0785845	0.0869977	0.021309	-0.0185059	-0.00906704	0.0871121	-0.00978657	0.065356	0.0449256	-0.0105147	0.0200298	0.0689502	-0.0137909	0.0400788	-0.00889002	0.0192981	0.0320631	0.0953329	0.0474148	-0.00673185	0.0186745	0.0551125	0.00879893	0.026451	-0.00173952	0.0401506	-0.00310581
chr3_141512163_141540609:+	-0.0142959	0.00845179	0.0013518	-0.00112029	0.00391091	0.00150094	-0.00423077	0.0187136	0.0307472	-0.000170573	0.00755329	0.000661285	0.00972754	0.0396069	0.0102852	0.000161618	0.058434	0.10271	-0.011327	0.00390097	0.00399069	0.102636	0.0302576	0.000723925	0.000227222	0.00217655	0.004543	0.0264319	0.0265049	0.0119884	0.0159768	0.00436505	-0.0147676	-0.00434044	0.0147714	0.147008	0.0184779	-0.00691258	0.0780832	0.0419087	0.094078	0.00223455	0.0139525	0.0188284	0.0976029	0.00268492	0.0319894	0.00098586	-0.00283243
chr3_149846011_149921227:+	-0.0373994	-0.0335263	-0.0782635	0.0382313	-0.00851004	-0.0324616	-0.0541143	-0.00666918	-0.0261464	0.0371783	-0.0646494	-0.0365314	0.0137513	-0.0773094	-0.0813748	0.133536	-0.0311198	-0.0206934	-0.0152859	0.00538024	0.0815986	-0.0765781	0.101178	-0.025331	-0.00313522	-0.0361722	0.0291881	-0.0793658	-0.0189674	-0.023517	-0.0957435	0.0405926	-0.0432117	0.00567342	0.023872	-0.00616993	-0.0679028	-0.0307014	0.00823843	-0.0630585	-0.0345078	-0.0286794	0.0176424	-0.0386951	-0.0217486	-0.0796252	-0.0481308	-0.01137	-0.0139467
chr3_151116338_151127984:+	-0.0593551	-0.0308536	-0.0579612	-0.0491836	-0.062874	-0.0665839	-0.0638562	-0.0779599	-0.0573982	-0.0696785	-0.0542775	-0.0624846	-0.0477304	-0.0449886	0.0388975	-0.013265	-0.0274127	-0.0197971	-0.0254234	0.0160306	-0.00433595	0.0141388	-0.00178326	-0.047397	-0.0566928	-0.0462332	-0.0387158	-0.0599819	-0.045297	-0.0551248	-0.0654587	-0.042228	0.00979317	-0.0764573	-0.0606976	-0.0447431	-0.0526019	-0.0492287	-0.0605068	-0.0588524	-0.0444986	-0.0780855	-0.038784	-0.079732	-0.00629876	-0.0466208	-0.0585313	-0.0538701	-0.0250624
chr3_154217869_154240579:+	-0.0303723	-0.00140244	-0.0264875	-0.0370903	-0.0216191	-0.0135341	-0.0355187	-0.019938	-0.0244572	0.0228147	-0.032865	-0.023028	-0.0253278	-0.015219	-0.036004	-0.0347439	-0.0368293	-0.00645538	-0.0306361	-0.000334975	-0.0075037	0.0012728	-0.0401639	-0.00814439	-0.0110722	0.000224259	-0.0111086	-0.031166	0.0204511	-0.00496893	-0.0243517	0.0163512	-0.0212508	-0.0336024	-0.0144352	-0.0239408	-0.0344305	-0.0223105	-0.0171052	-0.0328368	-0.0116767	-0.017793	-0.0253309	-0.0257551	-0.0246701	-0.0189089	-0.0182161	0.0231816	-0.00129878
chr3_155893518_155911279:+	-0.0806633	-0.124604	-0.133987	-0.0958014	-0.101406	-0.140368	-0.130818	-0.1182	-0.100259	-0.0875046	-0.113212	-0.158685	-0.110281	-0.134465	-0.11967	-0.145069	-0.0801391	-0.110352	-0.133557	-0.0992525	-0.119568	-0.089584	-0.122321	-0.142578	-0.110979	-0.13464	-0.122822	-0.0490977	-0.0781957	-0.0973367	-0.110855	-0.113447	-0.102033	-0.103863	-0.111106	-0.130996	-0.0664257	-0.0304091	-0.124715	-0.127055	-0.0833103	-0.125456	-0.118856	-0.156483	-0.0727428	-0.0859828	-0.0775284	-0.13849	-0.110623
chr3_158122103_158123991:+	-0.121425	-0.101891	-0.147758	-0.053663	-0.0953102	-0.137525	-0.0914559	-0.0841094	-0.10204	-0.12264	-0.120114	-0.124924	-0.0851527	-0.139932	-0.145897	-0.0373336	-0.100938	-0.133746	-0.0583446	-0.0969452	-0.111676	-0.0592729	-0.0568735	-0.114217	-0.121659	-0.146092	-0.0784722	-0.0519945	-0.0705365	-0.0885162	-0.0604169	-0.0215943	-0.135988	-0.176015	-0.0874553	-0.0608563	-0.0999492	0.0156497	-0.0506465	-0.013194	-0.135203	-0.091577	-0.117796	-0.107121	-0.0829614	-0.0747842	-0.114489	-0.109608	-0.130738
chr3_169976946_169988359:+	-0.0873235	-0.0675891	-0.0763529	-0.0842899	-0.0609746	-0.0729302	-0.0859982	-0.0459011	-0.0586436	-0.0788314	-0.0880885	-0.0726852	-0.0711554	-0.078266	-0.0749131	-0.0100756	-0.071433	-0.0829606	-0.0353137	-0.090165	-0.0642687	-0.0414603	-0.0198231	-0.0712693	-0.0742151	-0.0635755	-0.0883446	-0.0583108	-0.0318968	-0.0765834	-0.0707677	-0.0541365	-0.0826214	-0.0935859	-0.070871	-0.0493383	-0.0611686	0.017739	-0.076296	-0.0782553	-0.0812589	-0.0417414	-0.0997351	-0.0179174	-0.0292931	-0.0109858	-0.0716954	-0.108029	-0.066442
chr3_17009674_17014911:+	0.00325007	0.0135192	-0.0266893	-0.00279819	-0.0413514	-0.024089	-0.0343154	-0.0505336	-0.0602535	-0.0608934	-0.0462251	0.00652569	-0.0378136	-0.0316159	-0.057632	-0.0119233	0.0506191	-0.0276188	-0.015657	-0.0143678	-0.0427716	-0.0365202	0.0153627	-0.00047737	-0.0390803	-0.0148029	-0.0195222	0.0395647	0.0510558	-0.0294317	-0.0478301	0.0441151	0.0619166	-0.019643	-0.0475797	0.0135262	-0.0189289	-0.0631612	-0.0757252	-0.0641561	-0.0646699	-0.0543904	-0.0300702	-0.0511156	-0.0256823	0.0152402	-0.0220911	-0.0276593	-0.0694235
chr3_170136419_170149244:-	-0.105785	-0.0411639	-0.117865	-0.0988004	-0.092822	-0.0246071	-0.0851097	-0.0938363	-0.0811566	-0.0937385	-0.113451	-0.0661921	-0.0775688	-0.0487282	-0.126453	-0.0660131	-0.0457619	-0.105395	-0.0891795	-0.0722771	-0.0618694	-0.039272	-0.0983021	-0.0419267	-0.0939255	-0.0803531	-0.0742822	-0.0618885	-0.0708951	-0.0539254	-0.122915	-0.0732782	-0.0124611	-0.106401	-0.0966014	-0.0884046	-0.0828614	-0.05641	-0.106681	-0.0709423	-0.0812991	-0.111421	-0.0880687	-0.0678916	-0.0681491	-0.121046	-0.060195	-0.093555	-0.0996287
chr3_170359699_170361429:+	0.0115285	0.0249242	-0.00103933	0.00903729	0.00443105	0.011624	-0.00280882	0.0216606	-0.00864383	0.0210191	0.0128169	0.0285701	0.0287476	0.0310018	-0.00151296	0.0526179	0.0308732	0.0251092	-0.00210175	0.00541831	0.0127694	0.0223636	0.0336913	0.0222579	0.0111071	0.0188048	0.0360859	0.0072103	0.031458	0.00219749	0.0288528	0.0421263	0.0156178	0.0107553	0.0434294	-0.0030186	0.019876	-0.00697076	-0.0137017	0.0107453	0.0127841	0.0145068	0.0425713	0.00503464	0.0194052	-0.00219659	0.00322606	0.0290122	0.00145989
chr3_171188702_171194635:-	-0.0385428	-0.0102533	-0.0477875	-0.0395428	-0.0202054	-0.0141946	-0.00476991	-0.023174	-0.0568642	-0.0316495	0.00575752	-0.0296634	-0.0178473	0.0808802	-0.0571949	-0.0140737	0.0159647	-0.0598907	-0.0257334	-0.0146088	0.0377011	-0.0542076	-0.00884422	-0.0409773	-0.0341716	-0.0435959	-0.0229849	-0.0287016	-0.0486394	-0.0140149	-0.0539947	-0.00540325	-0.0517833	0.0225935	-0.0508166	-0.0215722	-0.023715	-0.0415204	-0.00989082	-0.030327	-0.0399092	-0.0353836	0.0122206	-0.0404584	-0.0340916	-0.0621179	-0.028792	-0.0365024	-0.022264
chr3_172247533_172251541:+	-0.0361656	-0.00182554	-0.0208818	-0.000742067	0.0245626	0.000806049	0.0241853	-0.0149511	-0.013198	-0.0209597	-0.0148897	0.0168385	-0.000760134	-0.0225391	-0.0261567	-0.023512	0.00811013	0.0324437	-0.0011367	-0.0309698	0.0516027	0.0082733	0.0409944	-0.0270418	0.0356481	-0.0011525	0.00772441	0.000589583	-0.0161466	0.0229119	-0.0209162	-0.00339809	-0.034731	0.110314	-0.0102226	0.0509194	0.0330799	-0.0175134	0.0260314	0.020013	0.0101582	-0.0174178	0.0159488	0.0472328	-0.00379311	0.0433278	-0.00710204	-0.00242803	-0.00159089
chr3_172645623_172648114:-	-0.00489987	-0.00309727	0.00368867	-0.00952148	-0.000387192	-0.0235924	0.00825855	-0.013793	0.00957113	0.0102585	-0.02152	0.0159826	0.00321173	-0.0268976	-0.0268373	0.0176889	0.0653488	0.0567336	0.0716001	-0.00621443	-0.0145526	0.0256104	0.0122038	-0.0022583	-0.0190885	-0.0209473	0.00786581	0.00904715	0.0420084	-0.0228514	-0.0209345	-0.00742163	-0.0238193	0.0332973	-0.0297246	-0.0250884	0.00479017	0.0205985	-0.0107706	0.0249553	-0.0361032	0.0672655	-0.00603285	0.0655399	0.0178995	0.0287216	0.00326764	0.015098	-0.0212331
chr3_179859062_179880123:-	0.00639281	0.0231561	0.020787	0.0388391	-0.0112047	0.0345824	0.0179427	0.0059286	0.0257543	-0.00613368	0.036431	-0.00383151	0.0335466	0.113615	0.0141974	0.0581887	0.0332924	0.00717958	0.00289658	-0.0042384	0.0343596	0.0227622	-0.00357552	0.0108498	-0.00230356	-0.0234749	0.0352016	0.0465772	0.0482502	0.0333193	0.0153636	0.00978235	0.189552	-0.0073203	0.00237519	0.00638103	-0.00162043	0.0110397	-0.00182607	0.00291467	-0.00123147	0.00240682	0.0479458	0.016063	0.0218903	0.0176004	0.0314848	0.0352342	0.030192
chr3_183205876_183207823:-	0.0126987	0.000170979	0.000794136	-0.00260795	-2.39e-05	-0.000417409	0.0465803	0.0222499	-0.00314696	0.0428784	0.0118386	0.017934	0.0309521	0.0666332	0.0152159	0.0486552	0.0208674	0.0444181	0.00973574	0.0338067	0.0478143	0.0624443	0.0558467	0.00954808	0.0222006	-0.00805218	0.0632012	0.0114553	-3e-06	-0.00595747	0.00679728	0.00871551	0.0108801	0.00515934	0.0134011	0.0293796	-0.0116354	0.0561165	0.011006	0.016665	0.0141969	0.00470831	0.0440961	0.0441971	0.0731322	0.0141465	0.022778	0.00489137	0.0149255
chr3_183338800_183389779:-	0.0160463	0.0303356	0.0309803	0.00888979	0.0134002	0.0704753	0.0313434	0.0141044	0.0192516	0.00840445	0.0106081	0.0100909	0.00629917	0.0836742	0.0241299	0.0079195	0.0201592	0.0244655	0.0253011	0.0225453	0.0154394	0.0386404	0.0666517	0.0399582	0.0256907	0.00696288	0.0536556	0.0244211	0.00199697	0.0514048	0.0191712	0.0734601	0.0477005	0.0359441	0.0204144	0.00378413	0.0100759	0.0300438	0.014091	0.0383317	0.00448806	0.000632345	0.0253455	0.0322118	0.0109903	0.0209341	0.00854648	0.0501381	0.00522394
chr3_183379297_183389779:-	-0.0891522	-0.050372	-0.0846285	0.00679257	-0.0564402	-0.0652533	-0.0662643	-0.0774684	-0.0627828	-0.0251407	-0.0410802	-0.0195947	-0.0354663	-0.0482283	-0.0863069	-0.0902808	-0.0299029	-0.0222525	-0.0892515	-0.0394799	-0.0956301	-0.0792687	-0.00079671	-0.0793955	-0.0386451	-0.0766127	-0.0182285	-0.0208037	-0.0650114	-0.07649	-0.0648699	-0.0592229	-0.0676181	-0.0847988	-0.0359122	-0.0724791	-0.0880724	-0.0684644	-0.0605118	-0.0484663	-0.05652	-0.0437914	-0.0448188	-0.00977256	-0.0599053	-0.0686989	-0.0746327	-0.0570416	-0.0655706
chr3_183643480_183651276:+	-0.00194916	-0.0231101	-0.0166242	-0.0326225	-0.0497614	-0.0463682	-0.0292457	-0.00173202	-0.0563403	-0.0129443	-0.0247397	-0.0353131	-0.01513	-0.0171301	0.0145879	-0.0669471	0.140251	-0.0708004	0.0109282	-0.0388173	-0.0875082	0.126807	0.00283651	-0.00453383	0.00866023	-0.04054	-0.0811625	0.146818	-0.0430117	-0.0254346	-0.00152285	-0.0643817	0.106707	-0.0134925	-0.0254806	0.105561	-0.0714171	0.209786	-0.069843	0.112551	0.0418752	0.0130983	-0.0599893	0.144047	0.0996045	0.0212854	0.0192514	0.112436	0.00494227
chr3_183643480_183665039:+	0.000678056	0.00735418	0.0074364	0.0267608	-0.00115336	0.00480766	0.0105383	-0.00277699	0.0209956	0.00775041	0.0208951	0.00828243	0.00737364	0.00435318	0.0104888	0.0316537	-0.00216884	-0.00224473	0.0049921	0.00488967	-0.0100212	0.0127667	0.0182028	-0.00929067	-0.00425826	0.0245383	0.00614931	0.0970887	0.0273519	0.0297208	0.00971928	0.0080629	0.00448064	0.00248958	0.00351618	0.10521	0.0190194	-0.0142956	0.111672	0.0493633	0.0338162	0.00571111	-0.00615445	0.0129397	0.0116177	0.00186502	0.0273204	0.0165455	0.0175383
chr3_183643480_183672484:+	0.23767	0.210779	0.230978	0.25752	0.131674	0.258515	0.311205	0.197771	0.213362	0.320437	0.352721	0.393236	0.13314	0.176398	0.162668	0.279804	0.97953	0.229489	0.319354	0.314198	0.334847	0.619251	0.422443	0.0817967	0.0856503	0.214537	0.0722365	0.327411	0.922306	0.336622	0.224873	0.19559	0.233653	0.392677	0.233727	0.0291855	0.514603	0.0551391	0.346436	0.372062	0.432933	0.247203	0.304373	0.562776	0.677435	0.141411	0.0722991	0.115705	0.0757518
chr3_183650296_183651276:+	-0.0727047	-0.019406	-0.0348925	0.00876411	-0.0506501	-0.0160021	-0.0135725	-0.0315951	-0.00703066	-0.00671751	0.00378177	-0.0344679	-0.0268576	-0.0569706	-0.0373208	-0.030517	-0.05965	-0.0124781	-0.0223894	-0.0302247	-0.052186	0.032183	-0.0393012	-0.039951	-0.0421011	-0.0268018	-0.00131258	-0.0136787	-0.0364657	-0.0195493	-0.017518	-0.0393866	-0.0252282	0.0351554	-0.0467512	-0.0625037	-0.0226219	0.00710221	-0.00610626	-0.0215994	-0.01565	-0.0386279	-0.0406242	-0.0235599	-0.0205968	-0.045578	-0.0319506	0.0318132	-0.0115185
chr3_183650296_183672484:+	-0.135568	-0.0627651	-0.094849	-0.0551163	-0.0734271	-0.0962013	-0.0733103	-0.0903324	-0.0690751	-0.0631007	-0.100742	-0.0780654	-0.104245	-0.126981	-0.0529743	-0.0579772	0.0144212	-0.124208	-0.0783371	-0.0895023	-0.0235494	-0.0721689	-0.0906779	-0.155487	-0.103916	-0.0756656	-0.080666	-0.0926208	-0.0759693	-0.0707132	-0.03423	-0.0773418	-0.0569076	-0.119687	-0.0897571	-0.0639309	-0.0700673	0.22693	-0.0848569	-0.0867768	-0.0637048	-0.0722288	-0.0648589	-0.0915237	-0.0464207	-0.0748813	-0.0771845	-0.0187674	-0.0968248
chr3_18378170_18420991:-	-0.0597318	-0.0697259	-0.104977	0.0294263	-0.0923382	-0.0838176	-0.115377	-0.108879	-0.112898	-0.0270157	-0.174803	-0.124956	-0.0996122	-0.0663324	-0.00271725	0.0325024	-0.0256393	-0.0601444	-0.124949	-0.0736468	0.00327129	-0.0559472	-0.0127807	-0.0625822	-0.0876283	-0.108608	-0.0240316	-0.0588425	-0.119865	-0.117512	-0.0930122	-0.101746	-0.0349622	-0.0581699	-0.0893874	-0.0783534	-0.105995	-0.0562062	-0.0995294	-0.0740165	-0.0928857	-0.153881	-0.00512395	-0.0641008	-0.100437	-0.10172	-0.0197563	-0.11485	-0.136447
chr3_18415111_18420991:-	-0.0187312	-0.00683739	-0.0146324	-0.0253636	-0.0119645	-0.0135908	-0.0207415	-0.0114664	-0.0230373	-0.0050876	-0.0245018	0.000286038	-0.00645027	0.0339067	-0.0211214	0.00112209	-0.0195648	0.0175726	-0.00655557	-0.0106259	0.0332851	0.000601366	-0.0206846	-0.00975117	0.014893	0.00220827	0.016529	-0.0138657	0.00818557	-0.0247357	-0.0126252	-0.0248069	0.000937692	-0.0203831	-0.0280301	-0.0206187	-0.0138679	0.00541222	-0.020432	-0.0141798	-0.0164248	-0.00640923	-0.0205611	-0.00424587	0.0161826	-0.0147735	-0.0101412	-0.0112759	-0.0210702
chr3_195381009_195392147:-	0.0155431	0.0950555	-0.00763213	0.0313807	0.020719	0.0278624	0.0345433	0.0188922	-0.0145629	0.0398535	0.00726916	-0.00288511	0.0389119	0.0323463	-0.000182847	-0.0208442	-0.00059796	0.0280583	0.0162323	0.0390188	0.00995012	0.0461914	-0.0217646	0.0178114	0.0414356	0.00691744	0.0570884	0.0455478	0.0141933	0.122018	-0.0198264	0.0436015	0.0429144	0.0313919	0.0255335	0.00189309	0.0112303	0.00201556	0.0296547	0.115766	0.0404146	-0.00857464	0.0332501	-0.0191416	0.0243142	0.0433134	-0.00368761	0.0327152	0.073818
chr3_196391813_196403019:-	-0.0326808	-0.0415418	-0.115948	-0.0872759	0.0484157	0.0535945	-0.00767542	-0.0680079	0.027809	0.0435911	0.0311608	0.00153411	-0.0190527	0.0636971	0.0627065	0.0332082	0.054081	-0.0905257	-0.00434213	0.062508	-0.0621619	0.00722641	0.0104414	0.0225476	0.0193013	-0.087237	-0.0123269	0.00337625	-0.0306639	-0.0237519	-0.0900375	0.0273621	0.0202804	-0.00765373	0.0143319	0.0385613	-0.0582135	-0.033859	0.0133155	-0.030008	-0.0951243	-0.0172212	-0.0290217	-0.0822974	0.0656059	-0.025197	-0.0170178	-0.0483643	-0.0321997
chr3_197081051_197119530:-	-0.014216	0.0354914	0.0124403	0.0245142	0.000235491	0.0474356	0.0137953	-0.0173098	-0.0102815	0.083963	-0.0176994	0.0280918	0.00554356	-0.0223321	0.0327088	0.0378668	0.0359426	0.0211226	0.00987662	-0.00767064	0.0850848	0.0399699	0.080945	0.0454332	0.0214151	-0.013206	0.0500943	0.00672386	-0.00791942	-0.0093435	-0.0153108	0.000696318	0.0208944	-0.0147439	0.030208	0.032837	0.0441575	0.0341532	0.01008	-0.0127891	0.00646457	0.0112953	0.0127371	0.00064686	0.00899107	-0.00640255	-0.00229965	-0.00976225	-0.01231
chr3_197104903_197119530:-	-0.0463719	-0.0231432	-0.0435521	-0.0489943	-0.014581	-0.0151001	0.00715887	-0.0188561	-0.0254617	-0.0089738	0.000707829	-0.00473684	-0.0303344	0.0112665	0.00804396	-0.0431531	0.00898729	-0.034504	0.000850154	-0.00207084	0.00242864	-0.026229	-0.0229911	-0.017235	-0.029015	-0.0369423	-0.0278222	-0.0355226	-0.0099718	0.00723917	-0.0465576	0.00544007	-0.0370718	-0.0499354	0.0678242	-0.0309771	-0.0385745	0.0351318	-0.0249518	-0.0162653	-0.0171111	-0.0240745	0.0051756	-0.0181041	0.0449262	-0.0235369	-0.0213553	-0.0297004	-0.0373486
chr3_27379249_27424152:-	-0.0302196	-0.0345278	-0.0624342	-0.0236606	-0.00820273	-0.0164249	-0.0146586	-0.0455846	0.012387	0.0164899	0.015511	0.0187885	-0.093769	-0.0181579	-0.0390824	-0.0804285	-0.100201	0.103719	-0.105253	-0.01071	-0.0192827	-0.0565026	0.0571833	-0.00102472	-0.0645854	-0.0254108	-0.0848052	0.0101154	0.0351182	-0.0295374	-0.0811593	-0.0316742	-0.0632525	0.121605	-0.0489316	-0.114553	0.0384516	-0.150161	0.00557482	-0.0175607	0.0190662	-0.0328755	-0.100302	0.0123441	-0.139663	0.0155609	-0.0171214	-0.0173433	-0.115381
chr3_27383153_27424152:-	-0.106558	-0.0217939	-0.0593934	-0.0721257	-0.0421734	-0.0739008	-0.0660872	-0.0550151	-0.0601719	0.0340472	-0.0543181	-0.0160358	-0.0709637	0.00576003	0.00838513	-0.0584225	0.0782357	-0.0565895	-0.0511066	-0.0500141	-0.093021	-0.0333243	-0.00573629	-0.0356025	-0.0419934	-0.0473462	-0.0717831	-0.0375188	-0.0303013	-0.052837	-0.0724447	-0.0766636	-0.0112884	-0.0197051	-0.0674816	-0.059144	-0.000666569	-0.0859345	-0.043157	-0.0555537	-0.0333152	-0.044334	-0.0482309	-0.0537352	-0.0521452	-0.0706073	-0.0388611	-0.0266813	-0.00404086
chr3_33068230_33068970:-	0.0133423	0.0104892	-0.00678435	-0.014382	-0.00255818	-0.0173438	0.0388578	0.00680073	0.0184825	0.00689283	0.044424	0.018215	0.0167266	-0.0112475	0.0122933	0.0136167	0.0427739	0.0168371	0.0272977	-0.0163985	0.00202387	0.0425653	0.0255238	0.0364797	0.0207006	-0.0011634	0.0370931	-0.0112342	-0.0107874	-0.0088665	0.0125952	0.017702	0.0234508	-0.00901215	0.00408972	-0.00616719	0.0176435	-0.00591863	-0.00817429	-0.0121342	-0.00979234	0.00436985	-0.0112789	0.0167845	0.0560312	0.00598308	-0.00636348	0.00521906	0.0198542
chr3_35679787_35691005:+	0.0230881	0.0252036	0.00592364	0.0423845	0.0198343	0.078186	-0.0111213	0.00858115	0.00386012	0.0403542	0.0275929	0.0423499	0.0629641	0.0554995	0.0286069	0.00409675	0.0262402	0.0102618	-0.00509715	0.0349418	0.0393747	0.0378448	0.0260777	0.0553835	0.0469414	0.042467	0.0241758	0.0125965	0.0879862	0.02468	0.0292903	0.0512783	0.10791	0.0343707	0.0166212	0.0658461	0.0148314	0.118813	-0.011434	-0.0183925	0.0174048	0.00361016	0.0683272	0.0127506	0.0193077	0.0458963	0.0127023	0.0441973	0.0311807
chr3_47037666_47046621:-	0.00417955	3.13e-05	0.00672082	0.0175824	0.0116656	0.0059305	0.0435038	0.00154177	0.0572775	0.0291514	0.0142035	0.0222261	-0.00484989	0.0234011	0.0141177	-0.00331269	-0.00427131	0.0580542	0.0229312	-0.0164307	0.00274704	0.0274494	0.0257434	0.0188048	0.0133796	0.0277578	0.0180295	0.0514188	0.0138826	0.0181251	0.0111566	0.0461017	-0.00680571	-0.0262496	-0.000604517	0.0514326	-0.00318161	0.0443949	-0.00669502	0.146617	-0.0101941	0.00316419	0.02937	0.0269786	0.0284006	0.0345786	0.0268502	-0.010159	-0.00248424
chr3_47425485_47428670:-	0.0463143	0.0282144	0.00462006	0.015899	0.018385	0.0320035	0.00290107	0.0189846	-0.000656023	0.022907	0.0144212	0.0547868	0.0302525	-0.00608453	0.0180732	0.0317476	0.0368585	0.0265409	0.0400594	0.0110886	0.0716954	0.0146215	0.0444899	0.0237861	0.0392109	0.0278874	0.0140799	0.00109363	0.0112413	0.0436773	0.00794802	0.0321309	0.051901	0.0218013	0.0431769	0.0330616	0.0174166	0.0283672	0.0341963	0.022378	0.0045966	-0.00223579	0.0100485	0.00257521	0.0487987	0.00863157	0.0428857	0.0353118	0.0108937
chr3_50065031_50066502:+	-0.0128312	0.0344442	-0.0153436	0.0129494	-0.00696822	0.0111768	0.0294085	-0.0129108	-0.0103452	-0.018975	-0.0270472	0.00422823	0.0180297	0.0592021	-0.0266377	0.0159824	0.043292	0.0342702	-0.0168171	0.0190649	0.0198209	0.0505962	0.079683	-0.0161742	0.0232811	-0.015549	-0.00443504	0.0210214	0.0920964	0.030416	-0.0099542	0.0370745	0.0325812	0.00126495	-0.0119279	0.00741917	0.0353636	0.0266623	-0.028777	-0.0248651	-0.0265454	-0.0287965	6.98e-05	-0.0263858	0.00425597	0.0060376	-0.00182157	0.043623	0.00225986
chr3_55683794_55950560:-	-0.000783742	-0.00357873	-0.0170167	-0.0205829	-0.0117345	-0.0123667	-0.0188994	-0.0193778	-0.0187579	0.0349576	-0.00830413	-0.0195889	-0.014279	0.00866527	0.00259911	0.0531913	-0.0252028	-0.000889693	-0.025368	-0.0133459	-0.0146949	0.0100995	-0.0307574	-0.00998151	0.0215131	-0.00427664	0.0156967	-0.00437692	0.0223584	-0.0211719	-0.0160344	0.005986	0.054881	-0.0055914	0.00912288	-0.0253523	-0.0213145	-0.0029803	0.00258383	-0.00293631	0.0198185	-0.00790015	-0.00086235	-0.0217847	0.00673542	-0.00523929	-0.013257	0.00531975	-0.0301055
chr3_55683794_55992250:-	-0.138291	-0.0293653	-0.195979	-0.0836673	-0.170357	-0.0967429	-0.240959	-0.304709	-0.213616	-0.19102	-0.238037	-0.181436	-0.140821	0.0965313	-0.112336	-0.184451	-0.202378	-0.166997	-0.276838	-0.171684	0.0485121	-0.232655	-0.428327	-0.188851	-0.0829177	-0.0690925	-0.297594	-0.291326	-0.146501	-0.00537064	-0.192209	-0.296298	-0.0657379	-0.177445	-0.271044	-0.186368	-0.274499	-0.14957	-0.237597	-0.19791	-0.278138	-0.2292	-0.112086	-0.126402	-0.17567	-0.240976	-0.152554	-0.21949	-0.278748
chr3_55888389_55950560:-	-0.084136	-0.0201191	-0.0410815	-0.00267434	-0.0386268	-0.0885138	-0.0422628	-0.0829247	-0.0542494	0.00222584	0.00923976	-0.0370209	-0.0474829	-0.0712916	-0.0502743	-0.0945569	0.0503177	0.00456388	0.016113	-0.00781989	-0.0562005	-0.0749598	-0.070014	-0.0602877	-0.0339932	-0.0208703	-0.00900783	-0.03121	0.00106675	-0.0751142	-0.0308847	-0.0514894	-0.0211018	-0.0465611	-0.0216166	0.0137561	-0.0768507	-0.0494617	-0.044431	-0.0479782	-0.0678209	-0.0153974	-0.0521648	-0.0893442	0.109464	-0.0223757	-0.0370226	0.0207407	-0.0891791
chr3_55950425_55992250:-	-0.0209015	-0.0290071	-0.0154068	-0.00430122	-0.0253926	-0.0387009	-0.0188162	-0.0268746	0.000786496	0.0179866	-0.0385476	-0.0190291	-0.0249842	-0.0284384	-0.026884	-0.0317536	0.024723	-0.0112481	-0.00203875	-0.00629319	-0.00266904	-0.0143384	-0.00319367	-0.0267214	-0.000327097	-0.0231649	-0.0233957	0.021703	-0.017325	0.085064	-0.014734	-0.0124585	-0.0315922	-0.0234011	-0.025594	-0.0250325	-0.0234354	-0.013213	-0.0118866	-0.0289254	0.0251905	-0.0284449	-0.0336721	0.0102791	-0.000995807	-0.0304801	-0.019798	-0.0307919	-0.0111106
chr3_56566594_56567053:+	-0.0484232	-0.022846	-0.0506587	-0.0355243	-0.0731499	-0.0549705	-0.027536	-0.0683044	-0.0562484	-0.048593	-0.0731979	-0.0327557	-0.0262696	0.025747	-0.0180685	-0.0462312	-0.021485	-0.046318	-0.0420477	-0.0587398	0.010426	0.0065293	-0.0440408	-0.0250088	-0.0546075	-0.0582858	-0.0157894	-0.0389875	0.0169786	0.0358072	-0.0548265	-0.0604408	0.0433182	-0.0580969	-0.056311	-0.0699349	-0.0214227	-0.0535641	-0.0646572	-0.0738625	-0.0525985	-0.0847345	-0.0355302	-0.0580004	-0.028846	-0.0341295	-0.0410873	-0.0423267	-0.0453437
chr3_56592970_56594028:+	-0.00257814	0.014871	-0.00750046	0.00899017	-0.0164334	0.00522648	0.00272599	-0.0218332	-0.0230322	0.0406897	-0.00497447	-0.00578556	-0.019636	-0.0130143	0.00343181	-0.0150393	0.0214792	-0.033755	-0.0163061	-0.00775093	-0.00729966	0.019049	-0.0264697	0.0117089	-0.0251764	-0.0219788	-0.00972136	0.0631532	0.0114548	0.0140656	0.00611837	0.00657653	-0.0180808	-0.0305828	-0.013141	-0.0307262	-0.0269735	-0.0249114	-0.0366647	-0.018652	-0.0370634	-0.0381632	-0.0366788	-0.0274361	-0.0320362	-0.0370548	-0.00984758	-0.0386274	0.0106461
chr3_56624479_56673725:-	-0.0185378	0.00859605	-0.00605102	-0.0145982	-0.0149916	-0.0174419	-0.0164	-0.022629	-0.0271559	0.0110144	-0.0260099	0.00216405	-0.00727642	-0.0295676	-0.0285092	-0.0245299	-0.0263788	-0.0162093	-0.0230192	-0.0214796	0.00792288	-0.0178767	0.00152348	0.0488739	-0.00761961	-0.00743096	-0.0111319	-0.0233424	-0.0157253	-0.0178528	-0.024637	-0.0244488	0.0150767	0.00724094	-0.0209729	-0.0173289	-0.0250243	-0.0226934	-0.0285302	-0.00395319	-0.00701267	-0.0257744	-0.027013	-0.0235695	0.0117887	0.00126422	-0.0141376	-0.00313474	-0.00259129
chr3_56660731_56673725:-	-0.0536911	0.00616559	-0.049677	-0.0254942	-0.02602	-0.00127565	0.00783218	-0.0298655	0.00820711	0.0190575	-0.0220321	0.0173956	-0.0313229	-0.0153422	-0.0423168	-0.0093323	0.0880661	0.10506	-0.00634973	0.0195042	0.0365714	0.0264451	0.00315346	0.000455569	-0.0509664	-0.0169184	0.00407565	0.0347735	0.0247031	-0.0304839	-0.044583	0.0193594	0.0175325	0.029323	0.00942414	0.0724364	-0.0166574	-0.0108693	0.0532601	0.0247726	0.00491571	-0.0165058	-0.036715	0.0649566	0.0342053	-0.0271523	-0.0136084	-0.00213765	-0.0288449
chr3_57242856_57267792:+	-0.0337529	-0.0411382	-0.00872371	-0.0448651	-0.0282656	-0.00848872	-0.0431975	-0.0156515	-0.0338154	-0.0458568	-0.0135701	-0.00991487	-0.0222585	-0.0201852	-0.0182806	-0.0195266	-0.0238463	-0.00153585	0.00130424	-0.0378755	-0.00565267	-0.0159709	-0.00935934	0.0112479	-0.0199231	-0.0561291	-0.0242733	-0.050823	-0.0444785	-0.0225546	-0.0197328	-0.00429823	-0.0428229	-0.0281768	-0.0158579	-0.0248087	-0.0295729	-0.0343927	-0.00997479	-0.0160983	-0.038813	-0.0192868	0.00747133	-0.0391441	-0.0405755	-0.0188737	-0.0151836	-0.0368429	-0.0387616
chr3_63912588_63913225:+	-0.00727765	0.0336243	-0.0242903	0.0258022	0.0250941	0.00774588	0.0439055	-0.0013736	0.0136228	-0.0371208	-0.0269984	0.0631568	0.0204364	-0.0341559	0.0194998	0.0217029	0.0826804	-0.00629956	-0.0211557	-0.00220127	0.0392086	0.0395095	0.0603788	-0.0246166	0.0757622	0.000648881	0.015257	0.0654643	0.0903972	0.0040675	-0.0251947	0.0031126	0.0270125	-0.0117809	-0.0201585	-0.0195286	0.0349086	-0.0279013	0.0511874	0.00664914	0.000903426	-0.0358121	0.0947768	0.0441131	-0.0241315	0.015704	-0.00133876	0.0375701	-0.0273368
chr3_65429520_65430881:-	-0.00406623	-0.00748832	-0.00475172	-0.020438	-0.0145634	-0.00826585	0.0121214	-0.00351181	0.0108495	-0.0201825	-0.0207544	0.00996413	0.0194731	-0.00426792	-0.00385962	-0.0140345	0.0498169	-0.00711567	0.019531	-0.0193628	0.0414081	0.0435649	0.00751455	0.0162575	-0.0105	-0.0192107	0.0367504	-0.00119872	0.0702406	-0.0117351	-0.00601771	0.0251958	0.0655083	-0.0046807	0.00993274	0.0167485	0.0047361	0.000501628	0.0428691	-0.0242572	-0.0193976	0.00305089	0.0162623	0.0194916	0.0294658	0.0180756	0.0281168	-0.0105821	0.0129073
chr3_66236544_66263379:+	0.0270225	0.0337141	0.00231115	-0.0136138	-0.0081923	0.0382906	-0.0144323	0.00247339	-0.00359728	0.00737421	-0.0143704	-0.0202916	0.00887555	0.0330189	-0.00503585	0.0339367	0.0311091	0.0167251	-0.0149543	0.0243322	-0.00506199	-0.0240115	0.0404388	-0.00851329	0.0383345	-0.00458807	0.0383386	-0.0154182	-0.0244682	0.00102113	-0.0134365	0.0103437	0.118845	0.0685965	0.00636226	-0.0223612	0.0107312	-0.0217592	0.0356636	0.0170172	0.00837654	-0.00404355	-0.0113067	0.0388281	-0.0299688	0.0151982	-0.0175013	0.0308609	-0.0102555
chr3_66243203_66263379:+	-0.00475029	0.00522756	0.000763907	0.0395164	0.0149735	0.0321904	0.0603911	0.0142704	0.0174252	0.0309031	0.0772189	0.0643318	0.0425597	0.0427257	-0.00574799	0.0110913	0.0567335	0.0381791	0.0437125	0.00495427	0.050926	0.115948	0.0759739	0.0388499	-0.00177941	0.0242397	0.063689	0.0543649	0.0117499	0.00736267	0.0208012	0.0760254	0.0552869	0.072032	9.54e-05	-0.00376587	0.0148813	0.0223069	0.0688036	0.0613562	0.0859661	0.0788332	0.0437735	0.0432734	0.0354903	0.0159275	0.0257203	0.0362378	0.0353598
chr3_71041328_71053773:-	-0.0391745	-0.0423936	-0.0390249	-0.002951	-0.0403433	-0.0488694	-0.0538445	-0.0440447	-0.0268911	-0.0167613	-0.0529357	-0.0425238	-0.0471177	-0.044716	-0.0504267	-0.052656	-0.0442612	-0.0510107	-0.0377799	-0.00569323	-0.0282082	-0.0502824	-0.0440085	-0.0173952	-0.0372321	-0.0430082	-0.027098	-0.0464733	-0.054513	-0.0510627	-0.0503522	-0.0464077	-0.0631691	-0.0636339	-0.047581	-0.0201982	-0.047183	0.0170971	-0.0352493	-0.00292235	-0.0316452	-0.0516939	-0.0567491	-0.0472732	-0.0565267	-0.0519797	-0.035147	-0.0520675	-0.0664093
chr4_102722871_102726683:-	0.0120313	-0.00796898	0.0496934	0.0422479	-0.00895559	-0.00494591	-0.0103004	-0.00811269	-0.0176298	0.0170171	-0.0256033	-0.0132157	-0.0118594	0.0654079	-0.0158559	0.00606679	-0.0153137	-0.00446091	-0.00238752	0.0046747	0.101596	-0.014254	0.0314186	0.0107681	0.0139261	0.0320452	0.0384719	0.014592	0.00288687	0.0133772	-0.0594946	0.0235137	0.0467934	-0.00466493	0.0191853	0.00999245	-0.0129602	-0.00899508	-0.0268537	0.013086	-0.0136666	-0.0292707	0.0276116	0.0323873	0.0180205	-0.0199966	-0.00814865	-0.00436686	0.0230861
chr4_106171095_106212835:-	0.0425579	-0.001247	0.00716164	-0.0028583	0.00983	0.00904437	0.0151215	0.0348959	0.0287979	0.00311355	0.0579411	0.00860809	0.0227531	0.0067719	0.0271412	0.031082	0.0615277	0.018144	0.07837	0.0578346	0.0359152	0.0239763	0.057187	0.0458515	0.0254455	0.0244936	0.0507461	0.00596118	0.0408776	-0.000961352	0.000582875	0.00366735	0.0586272	-0.023897	0.000482024	0.00970303	0.0161093	0.0617487	0.0153147	0.0224971	0.0360439	0.001939	0.0227996	0.0824673	0.00627445	0.0241537	0.0338308	-0.00165674	0.00196548
chr4_107682015_107701285:-	-0.0363418	-0.0540409	-0.049956	-0.0119682	-0.0172175	-0.0543935	-0.0600194	-0.033051	-0.0179813	0.0073527	-0.0342135	-0.0525988	-0.0667944	-0.0300219	-0.0719948	0.0248174	-0.0770175	-0.0334006	-0.0540412	-0.0700825	-0.023247	-0.0283593	0.062977	-0.0423961	-0.0505831	-0.0751481	-0.0535443	-0.0625823	0.0402774	-0.0229154	-0.0455431	-0.0586215	-0.0630809	-0.00357195	-0.0482434	-0.0660768	-0.0207837	-0.0149748	-0.0533596	-0.0397701	-0.0555612	-0.0262514	-0.00757065	-0.0170137	-0.0137702	0.0115444	-0.0388889	-0.0460918	-0.0231642
chr4_107944970_107947537:+	-0.00218484	-0.0126021	0.00173807	-0.0122662	-0.0170225	0.000464939	-0.0122417	-0.00966728	-0.00971184	0.00632395	-0.0314259	-0.00945669	-0.0164067	0.0187915	-0.0159647	0.011928	0.0181026	0.0248367	-0.0217447	-0.024585	0.0152716	-0.00566206	-0.0162019	-0.0120828	0.0140695	-0.0145337	0.00282243	0.00496337	0.00116845	-0.0145178	-0.0139137	-0.0103151	-0.024241	-0.0259255	-0.00170161	-0.0076878	-0.0218234	0.0375875	0.00152676	0.0387549	0.00101673	-0.0234275	0.00371348	0.00719871	0.0151512	-0.0101486	-0.0187954	-0.0105807	-0.00795747
chr4_118053756_118114960:+	-0.00781817	0.0150301	-0.0115548	-0.014016	-0.00441882	0.00428674	-0.0117318	0.00357113	-0.0126033	-0.0140089	-0.0130312	0.00806921	0.00636729	0.0644545	-0.0154774	-0.00977669	-0.0136552	0.0451892	-0.0113645	-0.0101343	0.020772	-0.00913503	0.0175663	0.0136575	-0.00976957	-0.0122693	0.00670541	-0.0114991	0.0163683	-0.00767159	-0.0128171	-0.00244893	-0.00386284	-0.00954508	-0.0108304	-0.00586638	0.00297125	0.0149238	-0.0121976	-0.0110316	0.028554	-0.0111192	0.0126905	0.0289542	-0.00506113	-0.00898976	-0.00405686	-0.00947272	0.0360548
chr4_118105018_118143684:+	0.0140412	0.0566779	-0.00288128	0.00958858	0.012416	0.0349607	0.027568	0.00471569	0.0893244	0.0107748	0.00395441	-0.00641782	0.00688344	0.023263	0.00826104	0.0115661	0.035139	0.0384984	0.013144	-0.000751996	0.0282124	-0.00582999	0.03813	0.0130172	0.0035612	0.0421388	0.0202989	0.0163219	0.0821816	0.065667	-0.000277003	0.000638152	0.0567637	0.0159049	0.0124582	0.147698	0.0600343	0.0483623	0.0213429	0.13133	0.0174843	0.00420254	0.0231854	0.0198705	0.106961	0.0408512	0.0167999	0.0118745	-0.00489532
chr4_1225360_1241519:-	-0.0409739	-0.0217784	-0.0269499	-0.0141445	-0.00524277	0.00882298	-0.0311107	-0.0356342	-0.0054926	-0.0380867	-0.0294965	-0.0205799	-0.0263267	0.0133024	-0.043004	-0.0436587	-0.017368	-0.0367318	-0.0371979	-0.00873371	-0.0422998	-0.0322956	-0.016589	-0.031745	-0.0271054	-0.0406875	-0.0335007	-0.0208409	-0.00107958	-0.0178218	-0.0150867	-0.028288	-0.0477896	-0.0370486	-0.044732	-0.0258087	-0.0208589	-0.0410305	-0.0173554	-0.0139782	-0.0404584	-0.0211832	-0.0149435	-0.0339152	-0.039382	-0.0250507	-0.0041208	-0.0255756	-0.00678002
chr4_128074460_128077962:+	-0.0658801	-0.0462065	-0.0825523	-0.0419991	-0.0661396	-0.0662654	-0.0328184	-0.0653502	-0.0738238	-0.0578523	-0.0420589	-0.0192285	-0.0788536	-0.0725327	-0.0864483	-0.0395411	-0.00127002	-0.0854203	-0.0771682	-0.0609611	-0.0187845	-0.0461238	-0.0115911	-0.0807033	-0.0457569	-0.0873812	-0.0487066	-0.0589511	-0.0673402	-0.0601964	-0.0622711	-0.0234025	-0.0476809	-0.0115829	-0.0656447	-0.0691503	-0.0660739	0.0179243	-0.0657291	-0.0739854	-0.0629684	-0.0732599	-0.0643831	-0.0538309	-0.039965	-0.0776687	-0.0357515	-0.0423727	-0.0338318
chr4_128936655_128959777:-	-0.0332897	0.0199112	-0.0352179	-0.0205769	-0.0127829	-0.0130558	-0.0148806	-0.0181341	0.00226728	-0.02334	-0.00513564	-0.0215088	0.0110743	0.0112147	0.0179782	-0.0225974	0.0451145	0.0643128	-0.0232928	-0.00977015	-0.000441807	-0.0394212	0.00403944	-0.00124818	0.00281281	-0.00388151	0.0131495	0.0125095	0.0602461	0.00322346	0.00527389	-0.0191255	0.0591787	0.014576	-0.0115324	0.0469117	-0.000551943	0.0844294	0.00023836	0.012425	0.0213015	-0.0272134	-0.0215418	-0.0144574	-0.00592771	-0.0110802	0.0028056	-0.023768	-0.0368947
chr4_128936655_129003876:-	0.0278461	-0.00705902	-0.0623782	0.0117502	0.00266354	-0.00242775	-0.0131253	-0.0271966	0.0163982	-0.0222638	-0.021803	0.0336416	0.019933	-0.0044504	0.0226029	0.0349657	0.0149641	-0.0253119	0.00287455	-0.0118475	0.00299757	0.00262657	0.0143091	0.0349386	-0.00130232	-0.0108473	0.0194457	-0.0192834	0.0432544	0.0500845	-0.0291944	0.00985578	0.0276843	0.0176739	-0.0177332	-0.0171108	0.00737822	-0.0271386	-0.0250722	-0.0386828	0.0270205	-0.0250552	-0.00530973	-0.00419785	0.00787519	-0.0249266	0.0136063	0.0202931	0.0147663
chr4_128992167_129003876:-	-0.0808798	-0.0858693	-0.0991769	-0.115012	-0.013749	-0.0147299	-0.0204821	-0.0561867	-0.0643965	-0.120432	-0.0014086	-0.0128873	0.0218213	-0.0989272	-0.0166167	-0.0828468	0.060537	0.058865	-0.0160266	0.0163434	0.0397968	0.0336469	-0.044991	0.107984	-0.00324447	-0.0896589	0.0109374	-0.104431	-0.0658357	-0.0166792	-0.0381236	0.0200029	0.0406199	-0.00425071	-0.0506482	0.0116413	-0.0769512	0.0470058	0.0146109	0.0210012	-0.102549	-0.0724254	0.0180293	-0.0339743	-0.0660111	-0.0493087	0.0755843	-0.0912002	-0.00295817
chr4_139125164_139139497:-	-0.0565346	0.0616715	-0.0608594	-0.0271055	-0.0569441	0.0011473	-0.036103	-0.0240043	-0.0417673	-0.0411662	-0.0475149	-0.0197291	-0.0339533	-0.00953892	0.0288887	0.00896229	-0.00920607	-0.0410211	-0.0229936	-0.0571554	0.0225962	0.0234386	0.02588	-0.0290707	-0.0398864	-0.0400686	-0.0168254	-0.00324152	0.00642851	0.00321838	-0.053201	-0.00341796	0.0158169	-0.0504307	-0.0238828	-0.0414648	-0.0105273	-0.0447849	-0.0156105	-0.0168333	-0.0316263	-0.0386317	-0.00223029	-0.0267026	-0.0173874	-0.0359926	-0.0355335	-0.0320195	-0.0479601
chr4_143543509_143543972:+	-0.524283	-0.216072	-0.643239	-0.475527	-0.410103	-0.772324	-0.10646	-0.464053	-0.509579	-0.322559	-0.132897	-0.226144	-0.257036	0.234025	-0.424761	-0.19912	0.852771	0.162204	-0.447984	-0.508418	-0.123768	0.530107	0.083398	-0.235159	-0.387057	-0.40833	0.0623759	-0.356539	0.950566	-0.246584	-0.560192	-0.238294	-0.0669965	-0.128128	-0.441061	-0.783184	0.0955803	0.414011	-0.328861	-0.131863	-0.0281588	-0.277561	-0.463312	0.127441	0.484128	-0.198585	-0.487404	-0.0727556	-0.554765
chr4_145845956_145849561:-	-0.00851623	0.0289582	-0.00862571	-0.04164	-0.00776803	-0.0257912	-0.000183957	-0.00132957	-0.0454078	-0.0473661	-0.0380737	0.00971211	0.000521331	-0.0344984	-0.0338103	-0.0330589	0.0160846	0.0674359	0.00629559	-0.000920362	-0.020978	-0.0258299	0.022986	0.018919	0.00200811	0.0236468	-0.0254585	-0.0300298	-0.00626527	-0.0150474	-0.0336014	0.0345733	0.0112005	-0.0365796	-0.0187607	-0.0374216	-0.0167787	-0.00181378	-0.00241878	0.0272429	0.0310408	-0.0403442	-0.0113009	0.0200811	-0.0182477	-0.0253774	-0.0187845	-0.0321457	-0.0726162
chr4_147857553_147881932:+	0.00259833	-0.0439638	-0.0366709	-0.0860378	-0.0320669	-0.00934262	-0.0234347	-0.0530391	-0.0592942	0.0101953	-0.0531714	-0.0334935	-0.10185	0.0406169	-0.0634055	-0.082289	-0.00374842	-0.0696181	-0.0401112	-0.0343834	-0.0229987	0.0152488	-0.063399	-0.0192396	-0.0365423	-0.106835	-0.0213952	-0.0533141	-0.0632625	0.015384	-0.0449483	-0.0334517	-0.0451767	-0.0265738	-0.00518566	-0.0317145	-0.0328513	0.093328	-0.0721482	0.00315743	-0.0243213	-0.0425428	-0.0209441	-0.0920375	-0.00550656	-0.0272364	-0.0436514	-0.0300066	-0.0494394
chr4_147939825_147955374:+	-0.0684276	-0.0179347	-0.0246268	-0.0578864	-0.0376703	-0.0347475	-0.0313786	-0.0429881	0.0663356	-0.0499933	0.0436337	0.0197804	-0.115751	0.00330938	-0.0264468	-0.0501689	0.093305	0.244563	-0.0982515	-0.0305447	-0.04135	-0.0225711	-0.0648532	-0.0394761	-0.0286634	-0.0750096	-0.0250424	0.0671053	-0.0248027	-0.0295171	-0.0467487	-0.0277362	-0.109814	-0.0153492	-0.0484746	-0.0494433	0.00246131	-0.150312	0.0805605	-0.0239009	-0.0825384	0.0162449	-0.00643024	0.0654571	-0.0703832	-0.0407184	-0.0168656	0.0131028	-0.005432
chr4_150102478_150102812:+	-0.0143426	-0.00831336	-0.0323132	0.0290072	-0.0215789	0.0174158	-0.0283929	-0.0291208	-0.0205019	0.0209458	-0.0300003	-0.0029787	0.00510475	0.0197493	-0.00812202	0.0144786	-0.0192458	0.00934774	-0.0280822	-0.0162089	0.0279619	-0.0139357	0.0161702	0.00205542	-0.00499686	-0.0218473	0.0176465	-0.0115583	-0.028263	-0.00832253	-0.0223083	0.00246766	-0.0131869	0.00228501	-0.0184413	0.0353579	-0.00892245	-0.0282488	-0.036457	-0.038272	-0.0128323	-0.0382497	0.0051922	-0.0131495	-0.0097621	-0.0266623	-0.020351	-0.0180324	-0.0153479
chr4_150203795_150239875:+	-0.04058	-0.0197572	-0.0312307	-0.0325831	-0.0344901	-0.021873	-0.0463053	-0.0347187	-0.0363369	-0.0437945	-0.024433	-0.0366172	-0.0175326	-0.00183872	-0.0336741	-0.0342098	-0.00316285	-0.0414257	-0.0405831	-0.0202666	0.025864	-0.0265489	-0.00556453	-0.0333897	-0.0236272	-0.0253138	-0.00414692	-0.032881	-0.0441691	-0.0357718	-0.0457544	-0.0295978	-0.00944334	-0.0442379	-0.0390079	-0.0186301	-0.0134314	-0.0451514	-0.00240392	-0.046748	-0.0420731	-0.0459467	-0.0209691	-0.001931	-0.011733	-0.0366432	-0.00943441	-0.0363739	-0.0369106
chr4_150798081_150817257:-	-0.0227822	0.0200524	0.0139105	0.00256357	0.0296571	-0.00863439	0.00357611	0.0032738	0.0505476	0.0224752	0.0294294	0.00959967	0.0108794	-0.00270548	0.0379734	0.0031834	0.0108244	0.0475324	0.000796213	0.0164573	-0.0121999	-0.0039176	0.0125807	0.0502207	-0.0103636	-3.03e-05	0.00415171	0.0110701	0.072667	0.00251893	-0.00458991	0.00888364	-0.0170931	0.0503466	0.00964697	0.00559986	0.00431239	-0.00927533	0.0108129	0.0726872	-0.000290198	-0.00474392	-0.00259366	0.0382326	0.0228398	0.00675226	0.0205177	-0.00914032	0.0444727
chr4_152411303_152412529:-	-0.363401	-0.112506	-0.378227	-0.810516	-0.372565	-0.168945	-0.270231	-0.4423	-0.368958	-0.0927722	-0.153865	-0.149718	-0.358769	-0.125921	-0.374544	-0.195771	-0.0245642	0.157333	-0.36954	-0.0010192	-0.288014	0.0805988	-0.0479665	-0.155065	-0.425885	-0.509625	-0.0460677	-0.126152	0.270475	-0.20795	-0.304681	-0.160008	-0.0237608	-0.20612	-0.409806	-0.548661	-0.185594	0.32456	-0.316541	-0.0959485	-0.153218	-0.453569	-0.191744	-0.171659	-0.173617	-0.237984	-0.257756	-0.343519	-0.450576
[truncated: 362 more rows]
[truncated: 116 more columns]
