# Supplementary material for: Trans-genetic effects of circular RNA expression quantitative trait loci and potential causal mechanisms in autism
Source: Research Square preprint supplement (doi:10.21203/rs.3.rs-155043/v1), 2021-02-05
Supplement: Supplementary file 2 [file cb94b08553168f8e9b33f570.xlsx]

## Sheet: circRNA-miRNA-gene
circRNA				trans-eGene
circRNA ID	circRNA name	Host gene symbol	miRNAs	trans-eGene	trans-eGene symbol	Overlapping with 257 circRNA-trans-eGene pairs that were causally connected with ASD diagnosis (1: yes; 0: no)
chr21_29321221_29329693:+	circBACH1	BACH1	hsa-miR-141-3p	ENSG00000000003	TSPAN6	0
chr21_29321221_29329693:+	circBACH1	BACH1	hsa-miR-186-5p	ENSG00000000003	TSPAN6	0
chr21_29321221_29329693:+	circBACH1	BACH1	hsa-miR-200a-3p	ENSG00000000003	TSPAN6	0
chr21_29321221_29329693:+	circBACH1	BACH1	hsa-miR-214-3p	ENSG00000000003	TSPAN6	0
chr21_29321221_29329693:+	circBACH1	BACH1	hsa-miR-223-3p	ENSG00000000003	TSPAN6	0
chr21_29321221_29329693:+	circBACH1	BACH1	hsa-miR-23a-3p	ENSG00000000003	TSPAN6	0
chr21_29321221_29329693:+	circBACH1	BACH1	hsa-miR-23b-3p	ENSG00000000003	TSPAN6	0
chr21_29321221_29329693:+	circBACH1	BACH1	hsa-miR-625-5p	ENSG00000000003	TSPAN6	0
chr21_29321221_29329693:+	circBACH1	BACH1	hsa-miR-141-3p	ENSG00000000460	C1orf112	0
chr21_29321221_29329693:+	circBACH1	BACH1	hsa-miR-182-5p	ENSG00000000460	C1orf112	0
chr21_29321221_29329693:+	circBACH1	BACH1	hsa-miR-186-5p	ENSG00000000460	C1orf112	0
chr21_29321221_29329693:+	circBACH1	BACH1	hsa-miR-200a-3p	ENSG00000000460	C1orf112	0
chr21_29321221_29329693:+	circBACH1	BACH1	hsa-miR-28-3p	ENSG00000000460	C1orf112	0
chr21_29321221_29329693:+	circBACH1	BACH1	hsa-miR-425-5p	ENSG00000000460	C1orf112	0
chr21_29321221_29329693:+	circBACH1	BACH1	hsa-miR-142-5p	ENSG00000000971	CFH	0
chr12_1263034_1290012:+	circERC1-1	ERC1	hsa-miR-29a-3p	ENSG00000003393	ALS2	0
chr12_1263034_1290012:+	circERC1-1	ERC1	hsa-miR-29b-3p	ENSG00000003393	ALS2	0
chr12_1263034_1290012:+	circERC1-1	ERC1	hsa-miR-29c-3p	ENSG00000003393	ALS2	0
chr21_29321221_29329693:+	circBACH1	BACH1	hsa-miR-186-5p	ENSG00000003400	CASP10	0
chr21_29321221_29329693:+	circBACH1	BACH1	hsa-miR-23a-3p	ENSG00000003400	CASP10	0
chr21_29321221_29329693:+	circBACH1	BACH1	hsa-miR-23b-3p	ENSG00000003400	CASP10	0
chr21_29321221_29329693:+	circBACH1	BACH1	hsa-miR-28-3p	ENSG00000003400	CASP10	0
chr21_29321221_29329693:+	circBACH1	BACH1	hsa-miR-425-5p	ENSG00000003400	CASP10	0
chr21_29321221_29329693:+	circBACH1	BACH1	hsa-miR-489-3p	ENSG00000003400	CASP10	0
chr2_147896301_147899898:+	circACVR2A	ACVR2A	hsa-miR-486-5p	ENSG00000005073	HOXA11	0
chr12_1263034_1290012:+	circERC1-1	ERC1	hsa-miR-29a-3p	ENSG00000005889	ZFX	0
chr12_1263034_1290012:+	circERC1-1	ERC1	hsa-miR-29b-3p	ENSG00000005889	ZFX	0
chr12_1263034_1290012:+	circERC1-1	ERC1	hsa-miR-29c-3p	ENSG00000005889	ZFX	0
chr12_1263034_1290012:+	circERC1-1	ERC1	hsa-miR-133a-3p	ENSG00000006468	ETV1	0
chr12_1263034_1290012:+	circERC1-1	ERC1	hsa-miR-133b	ENSG00000006468	ETV1	0
chr12_1289852_1444750:+	circERC1-2	ERC1	hsa-miR-150-5p	ENSG00000006468	ETV1	0
chr1_77801331_77815231:+	circMIGA1	MIGA1	hsa-miR-26a-5p	ENSG00000006659	LGALS14	0
chr1_77801331_77815231:+	circMIGA1	MIGA1	hsa-miR-26b-5p	ENSG00000006659	LGALS14	0
chr2_147896301_147899898:+	circACVR2A	ACVR2A	hsa-miR-486-5p	ENSG00000007168	PAFAH1B1	1
chr12_1263034_1290012:+	circERC1-1	ERC1	hsa-miR-133a-3p	ENSG00000007545	CRAMP1	0
chr12_1263034_1290012:+	circERC1-1	ERC1	hsa-miR-133b	ENSG00000007545	CRAMP1	0
chr12_1263034_1290012:+	circERC1-1	ERC1	hsa-miR-29a-3p	ENSG00000008083	JARID2	0
chr12_1263034_1290012:+	circERC1-1	ERC1	hsa-miR-29b-3p	ENSG00000008083	JARID2	0
chr12_1263034_1290012:+	circERC1-1	ERC1	hsa-miR-29c-3p	ENSG00000008083	JARID2	0
chr12_1263034_1290012:+	circERC1-1	ERC1	hsa-miR-29a-3p	ENSG00000008277	ADAM22	1
chr12_1263034_1290012:+	circERC1-1	ERC1	hsa-miR-29b-3p	ENSG00000008277	ADAM22	1
chr12_1263034_1290012:+	circERC1-1	ERC1	hsa-miR-29c-3p	ENSG00000008277	ADAM22	1
chr6_108854225_108876350:+	circARMC2	ARMC2	hsa-miR-136-5p	ENSG00000008324	SS18L2	0
chr6_108854225_108876350:+	circARMC2	ARMC2	hsa-miR-143-3p	ENSG00000008324	SS18L2	0
chr12_1263034_1290012:+	circERC1-1	ERC1	hsa-miR-29a-3p	ENSG00000009413	REV3L	0
chr12_1263034_1290012:+	circERC1-1	ERC1	hsa-miR-29b-3p	ENSG00000009413	REV3L	0
chr12_1263034_1290012:+	circERC1-1	ERC1	hsa-miR-29c-3p	ENSG00000009413	REV3L	0
chr12_1263034_1290012:+	circERC1-1	ERC1	hsa-miR-133a-3p	ENSG00000009694	TENM1	0
chr12_1263034_1290012:+	circERC1-1	ERC1	hsa-miR-133b	ENSG00000009694	TENM1	0
chr6_98899268_98927822:-	circFBXL4	FBXL4	hsa-miR-105-5p	ENSG00000010319	SEMA3G	0
chr6_98899268_98927822:-	circFBXL4	FBXL4	hsa-miR-149-5p	ENSG00000010319	SEMA3G	0
chr6_98899268_98927822:-	circFBXL4	FBXL4	hsa-miR-199b-3p	ENSG00000010319	SEMA3G	0
chr12_1263034_1290012:+	circERC1-1	ERC1	hsa-miR-29a-3p	ENSG00000010539	ZNF200	0
chr12_1263034_1290012:+	circERC1-1	ERC1	hsa-miR-29b-3p	ENSG00000010539	ZNF200	0
chr12_1263034_1290012:+	circERC1-1	ERC1	hsa-miR-29c-3p	ENSG00000010539	ZNF200	0
chr1_243645893_243843282:-	circAKT3-2	AKT3	hsa-miR-199b-3p	ENSG00000011201	ANOS1	0
chr1_243645893_243843282:-	circAKT3-2	AKT3	hsa-miR-432-5p	ENSG00000011201	ANOS1	0
chr2_147896301_147899898:+	circACVR2A	ACVR2A	hsa-miR-486-5p	ENSG00000011295	TTC19	1
chr2_147896301_147899898:+	circACVR2A	ACVR2A	hsa-miR-509-3p	ENSG00000011347	SYT7	0
chr21_29321221_29329693:+	circBACH1	BACH1	hsa-miR-105-5p	ENSG00000011465	DCN	0
chr21_29321221_29329693:+	circBACH1	BACH1	hsa-miR-142-5p	ENSG00000011465	DCN	0
chr21_29321221_29329693:+	circBACH1	BACH1	hsa-miR-150-5p	ENSG00000011465	DCN	0
chr21_29321221_29329693:+	circBACH1	BACH1	hsa-miR-182-5p	ENSG00000011465	DCN	0
chr21_29321221_29329693:+	circBACH1	BACH1	hsa-miR-374b-3p	ENSG00000011465	DCN	0
chr21_29321221_29329693:+	circBACH1	BACH1	hsa-miR-425-5p	ENSG00000011465	DCN	0
chr21_29321221_29329693:+	circBACH1	BACH1	hsa-miR-489-3p	ENSG00000011465	DCN	0
chr21_29321221_29329693:+	circBACH1	BACH1	hsa-miR-494-3p	ENSG00000011465	DCN	0
chr12_1263034_1290012:+	circERC1-1	ERC1	hsa-miR-29a-3p	ENSG00000011638	TMEM159	0
chr12_1263034_1290012:+	circERC1-1	ERC1	hsa-miR-29b-3p	ENSG00000011638	TMEM159	0
chr12_1263034_1290012:+	circERC1-1	ERC1	hsa-miR-29c-3p	ENSG00000011638	TMEM159	0
chr18_56758865_56781656:+	circWDR7	WDR7	hsa-miR-128-3p	ENSG00000012174	MBTPS2	1
chr3_183650296_183672484:+	circKLHL24	KLHL24	hsa-miR-1271-5p	ENSG00000017427	IGF1	0
chr3_183650296_183672484:+	circKLHL24	KLHL24	hsa-miR-182-5p	ENSG00000017427	IGF1	0
chr3_183650296_183672484:+	circKLHL24	KLHL24	hsa-miR-194-5p	ENSG00000017427	IGF1	0
chr3_183650296_183672484:+	circKLHL24	KLHL24	hsa-miR-374a-3p	ENSG00000017427	IGF1	0
chr3_183650296_183672484:+	circKLHL24	KLHL24	hsa-miR-376c-3p	ENSG00000017427	IGF1	0
chr3_183650296_183672484:+	circKLHL24	KLHL24	hsa-miR-543	ENSG00000017427	IGF1	0
chr12_1263034_1290012:+	circERC1-1	ERC1	hsa-miR-133a-3p	ENSG00000019549	SNAI2	0
chr12_1263034_1290012:+	circERC1-1	ERC1	hsa-miR-133b	ENSG00000019549	SNAI2	0
chr6_108854225_108876350:+	circARMC2	ARMC2	hsa-miR-136-5p	ENSG00000021461	CYP3A43	0
chr12_1263034_1290012:+	circERC1-1	ERC1	hsa-miR-133a-3p	ENSG00000021776	AQR	0
chr12_1263034_1290012:+	circERC1-1	ERC1	hsa-miR-133b	ENSG00000021776	AQR	0
chr18_56758865_56781656:+	circWDR7	WDR7	hsa-miR-103a-3p	ENSG00000022567	SLC45A4	0
chr18_56758865_56781656:+	circWDR7	WDR7	hsa-miR-107	ENSG00000022567	SLC45A4	0
chr18_56758865_56781656:+	circWDR7	WDR7	hsa-miR-135a-5p	ENSG00000022567	SLC45A4	0
chr18_56758865_56781656:+	circWDR7	WDR7	hsa-miR-135b-5p	ENSG00000022567	SLC45A4	0
chr18_56758865_56781656:+	circWDR7	WDR7	hsa-miR-345-5p	ENSG00000022567	SLC45A4	0
chr21_29321221_29329693:+	circBACH1	BACH1	hsa-miR-103a-3p	ENSG00000023445	BIRC3	0
chr21_29321221_29329693:+	circBACH1	BACH1	hsa-miR-107	ENSG00000023445	BIRC3	0
chr21_29321221_29329693:+	circBACH1	BACH1	hsa-miR-409-3p	ENSG00000023445	BIRC3	0
chr21_29321221_29329693:+	circBACH1	BACH1	hsa-miR-4677-3p	ENSG00000023445	BIRC3	0
chr2_147896301_147899898:+	circACVR2A	ACVR2A	hsa-miR-486-5p	ENSG00000025800	KPNA6	1
chr3_183650296_183672484:+	circKLHL24	KLHL24	hsa-miR-129-5p	ENSG00000026559	KCNG1	0
chr3_183650296_183672484:+	circKLHL24	KLHL24	hsa-miR-376c-3p	ENSG00000026559	KCNG1	0
chr6_98899268_98927822:-	circFBXL4	FBXL4	hsa-miR-24-3p	ENSG00000027869	SH2D2A	0
chr6_98899268_98927822:-	circFBXL4	FBXL4	hsa-miR-3909	ENSG00000027869	SH2D2A	0
chr2_147896301_147899898:+	circACVR2A	ACVR2A	hsa-miR-486-5p	ENSG00000027869	SH2D2A	0
chr12_1263034_1290012:+	circERC1-1	ERC1	hsa-miR-29a-3p	ENSG00000029534	ANK1	0
chr12_1263034_1290012:+	circERC1-1	ERC1	hsa-miR-29b-3p	ENSG00000029534	ANK1	0
chr12_1263034_1290012:+	circERC1-1	ERC1	hsa-miR-29c-3p	ENSG00000029534	ANK1	0
chr2_147896301_147899898:+	circACVR2A	ACVR2A	hsa-miR-509-3p	ENSG00000033627	ATP6V0A1	1
chr12_1263034_1290012:+	circERC1-1	ERC1	hsa-miR-29a-3p	ENSG00000038295	TLL1	0
chr12_1263034_1290012:+	circERC1-1	ERC1	hsa-miR-29b-3p	ENSG00000038295	TLL1	0
chr12_1263034_1290012:+	circERC1-1	ERC1	hsa-miR-29c-3p	ENSG00000038295	TLL1	0
chr12_1289852_1444750:+	circERC1-2	ERC1	hsa-miR-138-5p	ENSG00000040487	PQLC2	0
chr12_1289852_1444750:+	circERC1-2	ERC1	hsa-miR-150-5p	ENSG00000040487	PQLC2	0
chr6_98899268_98927822:-	circFBXL4	FBXL4	hsa-miR-142-3p	ENSG00000040933	INPP4A	0
chr6_98899268_98927822:-	circFBXL4	FBXL4	hsa-miR-182-5p	ENSG00000040933	INPP4A	0
chr6_98899268_98927822:-	circFBXL4	FBXL4	hsa-miR-185-5p	ENSG00000040933	INPP4A	0
chr6_98899268_98927822:-	circFBXL4	FBXL4	hsa-miR-21-5p	ENSG00000040933	INPP4A	0
chr6_98899268_98927822:-	circFBXL4	FBXL4	hsa-miR-3909	ENSG00000040933	INPP4A	0
chr6_98899268_98927822:-	circFBXL4	FBXL4	hsa-miR-499a-5p	ENSG00000040933	INPP4A	0
chr6_98899268_98927822:-	circFBXL4	FBXL4	hsa-miR-590-5p	ENSG00000040933	INPP4A	0
chr6_98899268_98927822:-	circFBXL4	FBXL4	hsa-miR-375	ENSG00000046774	MAGEC2	0
chr6_98899268_98927822:-	circFBXL4	FBXL4	hsa-miR-628-5p	ENSG00000046774	MAGEC2	0
chr6_98899268_98927822:-	circFBXL4	FBXL4	hsa-miR-374b-5p	ENSG00000046889	PREX2	0
chr2_147896301_147899898:+	circACVR2A	ACVR2A	hsa-miR-486-5p	ENSG00000047188	YTHDC2	0
chr12_1263034_1290012:+	circERC1-1	ERC1	hsa-miR-29a-3p	ENSG00000047346	FAM214A	0
chr12_1263034_1290012:+	circERC1-1	ERC1	hsa-miR-29b-3p	ENSG00000047346	FAM214A	0
chr12_1263034_1290012:+	circERC1-1	ERC1	hsa-miR-29c-3p	ENSG00000047346	FAM214A	0
chr18_76849526_76881512:+	circZNF236	ZNF236	hsa-miR-124-3p	ENSG00000047644	WWC3	0
chr18_76849526_76881512:+	circZNF236	ZNF236	hsa-miR-1286	ENSG00000047644	WWC3	0
chr18_76849526_76881512:+	circZNF236	ZNF236	hsa-miR-145-5p	ENSG00000047644	WWC3	0
chr18_76849526_76881512:+	circZNF236	ZNF236	hsa-miR-181a-5p	ENSG00000047644	WWC3	0
chr18_76849526_76881512:+	circZNF236	ZNF236	hsa-miR-181b-5p	ENSG00000047644	WWC3	0
chr18_76849526_76881512:+	circZNF236	ZNF236	hsa-miR-181c-5p	ENSG00000047644	WWC3	0
chr18_76849526_76881512:+	circZNF236	ZNF236	hsa-miR-181d-5p	ENSG00000047644	WWC3	0
chr18_76849526_76881512:+	circZNF236	ZNF236	hsa-miR-204-5p	ENSG00000047644	WWC3	0
chr18_76849526_76881512:+	circZNF236	ZNF236	hsa-miR-211-5p	ENSG00000047644	WWC3	0
chr18_76849526_76881512:+	circZNF236	ZNF236	hsa-miR-22-3p	ENSG00000047644	WWC3	0
chr18_76849526_76881512:+	circZNF236	ZNF236	hsa-miR-299-3p	ENSG00000047644	WWC3	0
chr18_76849526_76881512:+	circZNF236	ZNF236	hsa-miR-345-5p	ENSG00000047644	WWC3	0
chr18_76849526_76881512:+	circZNF236	ZNF236	hsa-miR-411-5p	ENSG00000047644	WWC3	0
chr18_76849526_76881512:+	circZNF236	ZNF236	hsa-miR-582-5p	ENSG00000047644	WWC3	0
chr2_147896301_147899898:+	circACVR2A	ACVR2A	hsa-miR-486-5p	ENSG00000048740	CELF2	0
chr2_147896301_147899898:+	circACVR2A	ACVR2A	hsa-miR-509-3p	ENSG00000048740	CELF2	0
chr3_183650296_183672484:+	circKLHL24	KLHL24	hsa-miR-1287-5p	ENSG00000049192	ADAMTS6	0
chr3_183650296_183672484:+	circKLHL24	KLHL24	hsa-miR-144-3p	ENSG00000049192	ADAMTS6	0
chr3_183650296_183672484:+	circKLHL24	KLHL24	hsa-miR-146a-5p	ENSG00000049192	ADAMTS6	0
chr3_183650296_183672484:+	circKLHL24	KLHL24	hsa-miR-146b-5p	ENSG00000049192	ADAMTS6	0
chr21_29321221_29329693:+	circBACH1	BACH1	hsa-miR-15a-5p	ENSG00000049192	ADAMTS6	0
chr21_29321221_29329693:+	circBACH1	BACH1	hsa-miR-15b-5p	ENSG00000049192	ADAMTS6	0
chr21_29321221_29329693:+	circBACH1	BACH1	hsa-miR-16-5p	ENSG00000049192	ADAMTS6	0
chr21_29321221_29329693:+	circBACH1	BACH1	hsa-miR-186-5p	ENSG00000049192	ADAMTS6	0
chr21_29321221_29329693:+	circBACH1	BACH1	hsa-miR-195-5p	ENSG00000049192	ADAMTS6	0
chr21_29321221_29329693:+	circBACH1	BACH1	hsa-miR-214-3p	ENSG00000049192	ADAMTS6	0
chr21_29321221_29329693:+	circBACH1	BACH1	hsa-miR-219a-2-3p	ENSG00000049192	ADAMTS6	0
chr21_29321221_29329693:+	circBACH1	BACH1	hsa-miR-23a-3p	ENSG00000049192	ADAMTS6	0
chr21_29321221_29329693:+	circBACH1	BACH1	hsa-miR-23b-3p	ENSG00000049192	ADAMTS6	0
chr21_29321221_29329693:+	circBACH1	BACH1	hsa-miR-424-5p	ENSG00000049192	ADAMTS6	0
chr3_183650296_183672484:+	circKLHL24	KLHL24	hsa-miR-452-5p	ENSG00000049192	ADAMTS6	0
chr21_29321221_29329693:+	circBACH1	BACH1	hsa-miR-497-5p	ENSG00000049192	ADAMTS6	0
chr18_76849526_76881512:+	circZNF236	ZNF236	hsa-miR-124-3p	ENSG00000049246	PER3	0
chr18_76849526_76881512:+	circZNF236	ZNF236	hsa-miR-1286	ENSG00000049246	PER3	0
chr18_76849526_76881512:+	circZNF236	ZNF236	hsa-miR-181a-5p	ENSG00000049246	PER3	0
chr18_76849526_76881512:+	circZNF236	ZNF236	hsa-miR-181b-5p	ENSG00000049246	PER3	0
chr18_76849526_76881512:+	circZNF236	ZNF236	hsa-miR-181c-5p	ENSG00000049246	PER3	0
chr18_76849526_76881512:+	circZNF236	ZNF236	hsa-miR-181d-5p	ENSG00000049246	PER3	0
chr18_76849526_76881512:+	circZNF236	ZNF236	hsa-miR-218-5p	ENSG00000049246	PER3	0
chr18_76849526_76881512:+	circZNF236	ZNF236	hsa-miR-22-3p	ENSG00000049246	PER3	0
chr12_1263034_1290012:+	circERC1-1	ERC1	hsa-miR-29a-3p	ENSG00000049246	PER3	0
chr12_1263034_1290012:+	circERC1-1	ERC1	hsa-miR-29b-3p	ENSG00000049246	PER3	0
chr12_1263034_1290012:+	circERC1-1	ERC1	hsa-miR-29c-3p	ENSG00000049246	PER3	0
chr18_76849526_76881512:+	circZNF236	ZNF236	hsa-miR-582-5p	ENSG00000049246	PER3	0
chr12_1289852_1444750:+	circERC1-2	ERC1	hsa-miR-1301-3p	ENSG00000050405	LIMA1	0
chr12_1289852_1444750:+	circERC1-2	ERC1	hsa-miR-150-5p	ENSG00000050405	LIMA1	0
chr12_1263034_1290012:+	circERC1-1	ERC1	hsa-miR-29a-3p	ENSG00000050405	LIMA1	0
chr12_1263034_1290012:+	circERC1-1	ERC1	hsa-miR-29b-3p	ENSG00000050405	LIMA1	0
chr12_1263034_1290012:+	circERC1-1	ERC1	hsa-miR-29c-3p	ENSG00000050405	LIMA1	0
chr10_14896846_14897517:+	circSUV39H2	SUV39H2	hsa-miR-144-3p	ENSG00000050628	PTGER3	0
chr10_14896846_14897517:+	circSUV39H2	SUV39H2	hsa-miR-214-3p	ENSG00000050628	PTGER3	0
chr10_14896846_14897517:+	circSUV39H2	SUV39H2	hsa-miR-380-3p	ENSG00000050628	PTGER3	0
chr10_14896846_14897517:+	circSUV39H2	SUV39H2	hsa-miR-382-3p	ENSG00000050628	PTGER3	0
chr10_14896846_14897517:+	circSUV39H2	SUV39H2	hsa-miR-577	ENSG00000050628	PTGER3	0
chr12_1289852_1444750:+	circERC1-2	ERC1	hsa-miR-1301-3p	ENSG00000051128	HOMER3	0
chr12_1289852_1444750:+	circERC1-2	ERC1	hsa-miR-1301-3p	ENSG00000053254	FOXN3	0
chr12_1263034_1290012:+	circERC1-1	ERC1	hsa-miR-133a-3p	ENSG00000053254	FOXN3	0
chr12_1263034_1290012:+	circERC1-1	ERC1	hsa-miR-133b	ENSG00000053254	FOXN3	0
chr12_1289852_1444750:+	circERC1-2	ERC1	hsa-miR-150-5p	ENSG00000053254	FOXN3	0
chr12_1263034_1290012:+	circERC1-1	ERC1	hsa-miR-29a-3p	ENSG00000053254	FOXN3	0
chr12_1263034_1290012:+	circERC1-1	ERC1	hsa-miR-29b-3p	ENSG00000053254	FOXN3	0
chr12_1263034_1290012:+	circERC1-1	ERC1	hsa-miR-29c-3p	ENSG00000053254	FOXN3	0
chr1_77801331_77815231:+	circMIGA1	MIGA1	hsa-miR-26a-5p	ENSG00000053371	AKR7A2	0
chr1_77801331_77815231:+	circMIGA1	MIGA1	hsa-miR-26b-5p	ENSG00000053371	AKR7A2	0
chr6_98899268_98927822:-	circFBXL4	FBXL4	hsa-miR-185-5p	ENSG00000054179	ENTPD2	0
chr6_98899268_98927822:-	circFBXL4	FBXL4	hsa-miR-105-5p	ENSG00000055130	CUL1	0
chr6_98899268_98927822:-	circFBXL4	FBXL4	hsa-miR-1307-3p	ENSG00000055130	CUL1	0
chr6_98899268_98927822:-	circFBXL4	FBXL4	hsa-miR-149-5p	ENSG00000055130	CUL1	0
chr10_14896846_14897517:+	circSUV39H2	SUV39H2	hsa-miR-1286	ENSG00000056097	ZFR	0
chr10_14896846_14897517:+	circSUV39H2	SUV39H2	hsa-miR-144-3p	ENSG00000056097	ZFR	0
chr10_14896846_14897517:+	circSUV39H2	SUV39H2	hsa-miR-200b-3p	ENSG00000056097	ZFR	0
chr10_14896846_14897517:+	circSUV39H2	SUV39H2	hsa-miR-214-3p	ENSG00000056097	ZFR	0
chr10_14896846_14897517:+	circSUV39H2	SUV39H2	hsa-miR-380-3p	ENSG00000056097	ZFR	0
chr10_14896846_14897517:+	circSUV39H2	SUV39H2	hsa-miR-421	ENSG00000056097	ZFR	0
chr10_14896846_14897517:+	circSUV39H2	SUV39H2	hsa-miR-429	ENSG00000056097	ZFR	0
chr10_14896846_14897517:+	circSUV39H2	SUV39H2	hsa-miR-577	ENSG00000056097	ZFR	0
chr6_98899268_98927822:-	circFBXL4	FBXL4	hsa-miR-182-5p	ENSG00000058056	USP13	0
chr6_98899268_98927822:-	circFBXL4	FBXL4	hsa-miR-374b-5p	ENSG00000058056	USP13	0
chr6_98899268_98927822:-	circFBXL4	FBXL4	hsa-miR-375	ENSG00000058056	USP13	0
chr6_98899268_98927822:-	circFBXL4	FBXL4	hsa-miR-628-5p	ENSG00000058056	USP13	0
chr12_1263034_1290012:+	circERC1-1	ERC1	hsa-miR-29a-3p	ENSG00000058085	LAMC2	0
chr12_1263034_1290012:+	circERC1-1	ERC1	hsa-miR-29b-3p	ENSG00000058085	LAMC2	0
chr12_1263034_1290012:+	circERC1-1	ERC1	hsa-miR-29c-3p	ENSG00000058085	LAMC2	0
chr12_1263034_1290012:+	circERC1-1	ERC1	hsa-miR-29a-3p	ENSG00000062370	ZNF112	0
chr12_1263034_1290012:+	circERC1-1	ERC1	hsa-miR-29b-3p	ENSG00000062370	ZNF112	0
chr12_1263034_1290012:+	circERC1-1	ERC1	hsa-miR-29c-3p	ENSG00000062370	ZNF112	0
chr21_29321221_29329693:+	circBACH1	BACH1	hsa-miR-141-3p	ENSG00000062716	VMP1	0
chr21_29321221_29329693:+	circBACH1	BACH1	hsa-miR-142-5p	ENSG00000062716	VMP1	0
chr21_29321221_29329693:+	circBACH1	BACH1	hsa-miR-150-5p	ENSG00000062716	VMP1	0
chr21_29321221_29329693:+	circBACH1	BACH1	hsa-miR-186-5p	ENSG00000062716	VMP1	0
chr21_29321221_29329693:+	circBACH1	BACH1	hsa-miR-195-5p	ENSG00000062716	VMP1	0
chr21_29321221_29329693:+	circBACH1	BACH1	hsa-miR-200a-3p	ENSG00000062716	VMP1	0
chr21_29321221_29329693:+	circBACH1	BACH1	hsa-miR-214-3p	ENSG00000062716	VMP1	0
chr21_29321221_29329693:+	circBACH1	BACH1	hsa-miR-223-3p	ENSG00000062716	VMP1	0
chr21_29321221_29329693:+	circBACH1	BACH1	hsa-miR-2355-5p	ENSG00000062716	VMP1	0
chr21_29321221_29329693:+	circBACH1	BACH1	hsa-miR-23a-3p	ENSG00000062716	VMP1	0
chr21_29321221_29329693:+	circBACH1	BACH1	hsa-miR-23b-3p	ENSG00000062716	VMP1	0
chr21_29321221_29329693:+	circBACH1	BACH1	hsa-miR-374b-3p	ENSG00000062716	VMP1	0
chr21_29321221_29329693:+	circBACH1	BACH1	hsa-miR-489-3p	ENSG00000062716	VMP1	0
chr12_1263034_1290012:+	circERC1-1	ERC1	hsa-miR-29a-3p	ENSG00000064309	CDON	0
chr12_1263034_1290012:+	circERC1-1	ERC1	hsa-miR-29b-3p	ENSG00000064309	CDON	0
chr12_1263034_1290012:+	circERC1-1	ERC1	hsa-miR-29c-3p	ENSG00000064309	CDON	0
chr6_108854225_108876350:+	circARMC2	ARMC2	hsa-miR-143-3p	ENSG00000064419	TNPO3	0
chr6_108854225_108876350:+	circARMC2	ARMC2	hsa-miR-136-5p	ENSG00000065243	PKN2	0
chr6_108854225_108876350:+	circARMC2	ARMC2	hsa-miR-143-3p	ENSG00000065243	PKN2	0
chr6_108854225_108876350:+	circARMC2	ARMC2	hsa-miR-143-3p	ENSG00000066422	ZBTB11	0
chr1_84179177_84197824:+	circPRKACB	PRKACB	hsa-miR-153-3p	ENSG00000068078	FGFR3	0
chr6_98899268_98927822:-	circFBXL4	FBXL4	hsa-miR-153-3p	ENSG00000068078	FGFR3	0
chr6_98899268_98927822:-	circFBXL4	FBXL4	hsa-miR-24-3p	ENSG00000068078	FGFR3	0
chr1_84179177_84197824:+	circPRKACB	PRKACB	hsa-miR-361-3p	ENSG00000068078	FGFR3	0
chr6_98899268_98927822:-	circFBXL4	FBXL4	hsa-miR-378a-3p	ENSG00000068078	FGFR3	0
chr6_98899268_98927822:-	circFBXL4	FBXL4	hsa-miR-450b-5p	ENSG00000068078	FGFR3	0
chr12_1263034_1290012:+	circERC1-1	ERC1	hsa-miR-133a-3p	ENSG00000068745	IP6K2	0
chr12_1263034_1290012:+	circERC1-1	ERC1	hsa-miR-133b	ENSG00000068745	IP6K2	0
chr18_76849526_76881512:+	circZNF236	ZNF236	hsa-miR-181a-5p	ENSG00000068781	STON1-GTF2A1L	0
chr18_76849526_76881512:+	circZNF236	ZNF236	hsa-miR-181b-5p	ENSG00000068781	STON1-GTF2A1L	0
chr18_76849526_76881512:+	circZNF236	ZNF236	hsa-miR-181c-5p	ENSG00000068781	STON1-GTF2A1L	0
chr18_76849526_76881512:+	circZNF236	ZNF236	hsa-miR-181d-5p	ENSG00000068781	STON1-GTF2A1L	0
chr6_98899268_98927822:-	circFBXL4	FBXL4	hsa-miR-185-5p	ENSG00000068976	PYGM	0
chr12_1263034_1290012:+	circERC1-1	ERC1	hsa-miR-29a-3p	ENSG00000069667	RORA	0
chr12_1263034_1290012:+	circERC1-1	ERC1	hsa-miR-29b-3p	ENSG00000069667	RORA	0
chr12_1263034_1290012:+	circERC1-1	ERC1	hsa-miR-29c-3p	ENSG00000069667	RORA	0
chr2_147896301_147899898:+	circACVR2A	ACVR2A	hsa-miR-486-5p	ENSG00000069812	HES2	0
chr12_1263034_1290012:+	circERC1-1	ERC1	hsa-miR-29a-3p	ENSG00000070540	WIPI1	0
chr12_1263034_1290012:+	circERC1-1	ERC1	hsa-miR-29b-3p	ENSG00000070540	WIPI1	0
chr12_1263034_1290012:+	circERC1-1	ERC1	hsa-miR-29c-3p	ENSG00000070540	WIPI1	0
chr12_1289852_1444750:+	circERC1-2	ERC1	hsa-miR-1301-3p	ENSG00000071243	ING3	0
chr12_1263034_1290012:+	circERC1-1	ERC1	hsa-miR-29a-3p	ENSG00000071243	ING3	0
chr12_1263034_1290012:+	circERC1-1	ERC1	hsa-miR-29b-3p	ENSG00000071243	ING3	0
chr12_1263034_1290012:+	circERC1-1	ERC1	hsa-miR-29c-3p	ENSG00000071243	ING3	0
chr12_1263034_1290012:+	circERC1-1	ERC1	hsa-miR-29a-3p	ENSG00000072422	RHOBTB1	0
chr12_1263034_1290012:+	circERC1-1	ERC1	hsa-miR-29b-3p	ENSG00000072422	RHOBTB1	0
chr12_1263034_1290012:+	circERC1-1	ERC1	hsa-miR-29c-3p	ENSG00000072422	RHOBTB1	0
chr21_29321221_29329693:+	circBACH1	BACH1	hsa-miR-103a-3p	ENSG00000072778	ACADVL	0
chr21_29321221_29329693:+	circBACH1	BACH1	hsa-miR-107	ENSG00000072778	ACADVL	0
chr21_29321221_29329693:+	circBACH1	BACH1	hsa-miR-141-3p	ENSG00000072778	ACADVL	0
chr21_29321221_29329693:+	circBACH1	BACH1	hsa-miR-150-5p	ENSG00000072778	ACADVL	0
chr21_29321221_29329693:+	circBACH1	BACH1	hsa-miR-200a-3p	ENSG00000072778	ACADVL	0
chr12_1263034_1290012:+	circERC1-1	ERC1	hsa-miR-29a-3p	ENSG00000072786	STK10	0
chr12_1263034_1290012:+	circERC1-1	ERC1	hsa-miR-29b-3p	ENSG00000072786	STK10	0
chr12_1263034_1290012:+	circERC1-1	ERC1	hsa-miR-29c-3p	ENSG00000072786	STK10	0
chr6_98899268_98927822:-	circFBXL4	FBXL4	hsa-miR-105-5p	ENSG00000072840	EVC	0
chr6_98899268_98927822:-	circFBXL4	FBXL4	hsa-miR-149-5p	ENSG00000072840	EVC	0
chr6_98899268_98927822:-	circFBXL4	FBXL4	hsa-miR-185-5p	ENSG00000072840	EVC	0
chr6_98899268_98927822:-	circFBXL4	FBXL4	hsa-miR-24-3p	ENSG00000072840	EVC	0
chr6_98899268_98927822:-	circFBXL4	FBXL4	hsa-miR-33a-5p	ENSG00000072840	EVC	0
chr6_98899268_98927822:-	circFBXL4	FBXL4	hsa-miR-33b-5p	ENSG00000072840	EVC	0
chr1_84179177_84197824:+	circPRKACB	PRKACB	hsa-miR-369-3p	ENSG00000072840	EVC	0
chr6_98899268_98927822:-	circFBXL4	FBXL4	hsa-miR-3909	ENSG00000072840	EVC	0
chr6_98899268_98927822:-	circFBXL4	FBXL4	hsa-miR-584-5p	ENSG00000072840	EVC	0
chr12_1263034_1290012:+	circERC1-1	ERC1	hsa-miR-29a-3p	ENSG00000072858	SIDT1	0
chr12_1263034_1290012:+	circERC1-1	ERC1	hsa-miR-29b-3p	ENSG00000072858	SIDT1	0
chr12_1263034_1290012:+	circERC1-1	ERC1	hsa-miR-29c-3p	ENSG00000072858	SIDT1	0
chr6_98899268_98927822:-	circFBXL4	FBXL4	hsa-miR-149-5p	ENSG00000073282	TP63	0
chr6_98899268_98927822:-	circFBXL4	FBXL4	hsa-miR-185-5p	ENSG00000073282	TP63	0
chr1_84179177_84197824:+	circPRKACB	PRKACB	hsa-miR-200b-3p	ENSG00000073282	TP63	0
chr6_98899268_98927822:-	circFBXL4	FBXL4	hsa-miR-21-5p	ENSG00000073282	TP63	0
chr6_98899268_98927822:-	circFBXL4	FBXL4	hsa-miR-33a-5p	ENSG00000073282	TP63	0
chr6_98899268_98927822:-	circFBXL4	FBXL4	hsa-miR-33b-5p	ENSG00000073282	TP63	0
chr1_84179177_84197824:+	circPRKACB	PRKACB	hsa-miR-361-3p	ENSG00000073282	TP63	0
chr1_84179177_84197824:+	circPRKACB	PRKACB	hsa-miR-369-3p	ENSG00000073282	TP63	0
chr1_84179177_84197824:+	circPRKACB	PRKACB	hsa-miR-429	ENSG00000073282	TP63	0
chr6_98899268_98927822:-	circFBXL4	FBXL4	hsa-miR-450b-5p	ENSG00000073282	TP63	0
chr6_98899268_98927822:-	circFBXL4	FBXL4	hsa-miR-590-5p	ENSG00000073282	TP63	0
chr12_1263034_1290012:+	circERC1-1	ERC1	hsa-miR-133a-3p	ENSG00000073792	IGF2BP2	0
chr12_1263034_1290012:+	circERC1-1	ERC1	hsa-miR-133b	ENSG00000073792	IGF2BP2	0
chr6_18236452_18258405:-	circDEK	DEK	hsa-miR-1271-5p	ENSG00000074266	EED	0
chr6_18236452_18258405:-	circDEK	DEK	hsa-miR-193a-3p	ENSG00000074266	EED	0
chr6_18236452_18258405:-	circDEK	DEK	hsa-miR-193b-3p	ENSG00000074266	EED	0
chr12_1263034_1290012:+	circERC1-1	ERC1	hsa-miR-133a-3p	ENSG00000074370	ATP2A3	0
chr12_1263034_1290012:+	circERC1-1	ERC1	hsa-miR-133b	ENSG00000074370	ATP2A3	0
chr21_29321221_29329693:+	circBACH1	BACH1	hsa-miR-103a-3p	ENSG00000074660	SCARF1	0
chr21_29321221_29329693:+	circBACH1	BACH1	hsa-miR-107	ENSG00000074660	SCARF1	0
chr21_29321221_29329693:+	circBACH1	BACH1	hsa-miR-15a-5p	ENSG00000074660	SCARF1	0
chr21_29321221_29329693:+	circBACH1	BACH1	hsa-miR-15b-5p	ENSG00000074660	SCARF1	0
chr21_29321221_29329693:+	circBACH1	BACH1	hsa-miR-16-5p	ENSG00000074660	SCARF1	0
chr21_29321221_29329693:+	circBACH1	BACH1	hsa-miR-195-5p	ENSG00000074660	SCARF1	0
chr21_29321221_29329693:+	circBACH1	BACH1	hsa-miR-214-3p	ENSG00000074660	SCARF1	0
chr21_29321221_29329693:+	circBACH1	BACH1	hsa-miR-223-3p	ENSG00000074660	SCARF1	0
chr21_29321221_29329693:+	circBACH1	BACH1	hsa-miR-424-5p	ENSG00000074660	SCARF1	0
chr21_29321221_29329693:+	circBACH1	BACH1	hsa-miR-497-5p	ENSG00000074660	SCARF1	0
chr10_50433476_50466932:-	circSGMS1	SGMS1	hsa-miR-337-3p	ENSG00000075275	CELSR1	0
chr10_50433476_50466932:-	circSGMS1	SGMS1	hsa-miR-421	ENSG00000075275	CELSR1	0
chr10_50433476_50466932:-	circSGMS1	SGMS1	hsa-miR-452-5p	ENSG00000075275	CELSR1	0
chr10_50433476_50466932:-	circSGMS1	SGMS1	hsa-miR-543	ENSG00000075275	CELSR1	0
chr12_1263034_1290012:+	circERC1-1	ERC1	hsa-miR-29a-3p	ENSG00000076641	PAG1	0
chr12_1263034_1290012:+	circERC1-1	ERC1	hsa-miR-29b-3p	ENSG00000076641	PAG1	0
chr12_1263034_1290012:+	circERC1-1	ERC1	hsa-miR-29c-3p	ENSG00000076641	PAG1	0
chr18_76849526_76881512:+	circZNF236	ZNF236	hsa-miR-1286	ENSG00000077044	DGKD	0
chr18_76849526_76881512:+	circZNF236	ZNF236	hsa-miR-181c-5p	ENSG00000077044	DGKD	0
chr18_76849526_76881512:+	circZNF236	ZNF236	hsa-miR-218-5p	ENSG00000077044	DGKD	0
chr18_76849526_76881512:+	circZNF236	ZNF236	hsa-miR-22-3p	ENSG00000077044	DGKD	0
chr18_76849526_76881512:+	circZNF236	ZNF236	hsa-miR-299-3p	ENSG00000077044	DGKD	0
chr12_1263034_1290012:+	circERC1-1	ERC1	hsa-miR-29a-3p	ENSG00000077044	DGKD	0
chr12_1263034_1290012:+	circERC1-1	ERC1	hsa-miR-29b-3p	ENSG00000077044	DGKD	0
chr12_1263034_1290012:+	circERC1-1	ERC1	hsa-miR-29c-3p	ENSG00000077044	DGKD	0
chr18_76849526_76881512:+	circZNF236	ZNF236	hsa-miR-345-5p	ENSG00000077044	DGKD	0
chr6_98899268_98927822:-	circFBXL4	FBXL4	hsa-miR-153-3p	ENSG00000077458	FAM76B	0
chr6_98899268_98927822:-	circFBXL4	FBXL4	hsa-miR-199b-3p	ENSG00000077458	FAM76B	0
chr6_98899268_98927822:-	circFBXL4	FBXL4	hsa-miR-21-5p	ENSG00000077458	FAM76B	0
chr6_98899268_98927822:-	circFBXL4	FBXL4	hsa-miR-33a-5p	ENSG00000077458	FAM76B	0
chr6_98899268_98927822:-	circFBXL4	FBXL4	hsa-miR-33b-5p	ENSG00000077458	FAM76B	0
chr6_98899268_98927822:-	circFBXL4	FBXL4	hsa-miR-374a-5p	ENSG00000077458	FAM76B	0
chr6_98899268_98927822:-	circFBXL4	FBXL4	hsa-miR-374b-5p	ENSG00000077458	FAM76B	0
chr6_98899268_98927822:-	circFBXL4	FBXL4	hsa-miR-375	ENSG00000077458	FAM76B	0
chr6_98899268_98927822:-	circFBXL4	FBXL4	hsa-miR-489-3p	ENSG00000077458	FAM76B	0
chr6_98899268_98927822:-	circFBXL4	FBXL4	hsa-miR-590-5p	ENSG00000077458	FAM76B	0
chr2_147896301_147899898:+	circACVR2A	ACVR2A	hsa-miR-486-5p	ENSG00000077585	GPR137B	1
chr12_1263034_1290012:+	circERC1-1	ERC1	hsa-miR-133a-3p	ENSG00000077782	FGFR1	0
chr12_1263034_1290012:+	circERC1-1	ERC1	hsa-miR-133b	ENSG00000077782	FGFR1	0
chr6_98899268_98927822:-	circFBXL4	FBXL4	hsa-miR-149-5p	ENSG00000077942	FBLN1	0
chr6_98899268_98927822:-	circFBXL4	FBXL4	hsa-miR-182-5p	ENSG00000077942	FBLN1	0
chr6_98899268_98927822:-	circFBXL4	FBXL4	hsa-miR-21-5p	ENSG00000077942	FBLN1	0
chr6_98899268_98927822:-	circFBXL4	FBXL4	hsa-miR-24-3p	ENSG00000077942	FBLN1	0
chr6_98899268_98927822:-	circFBXL4	FBXL4	hsa-miR-499a-5p	ENSG00000077942	FBLN1	0
chr6_98899268_98927822:-	circFBXL4	FBXL4	hsa-miR-590-5p	ENSG00000077942	FBLN1	0
chr6_98899268_98927822:-	circFBXL4	FBXL4	hsa-miR-450b-5p	ENSG00000078053	AMPH	0
chr12_1263034_1290012:+	circERC1-1	ERC1	hsa-miR-29a-3p	ENSG00000078114	NEBL	0
chr12_1263034_1290012:+	circERC1-1	ERC1	hsa-miR-29b-3p	ENSG00000078114	NEBL	0
chr12_1263034_1290012:+	circERC1-1	ERC1	hsa-miR-29c-3p	ENSG00000078114	NEBL	0
chr6_108854225_108876350:+	circARMC2	ARMC2	hsa-miR-143-3p	ENSG00000078177	N4BP2	0
chr6_98899268_98927822:-	circFBXL4	FBXL4	hsa-miR-142-3p	ENSG00000078596	ITM2A	0
chr6_98899268_98927822:-	circFBXL4	FBXL4	hsa-miR-375	ENSG00000078596	ITM2A	0
chr6_108854225_108876350:+	circARMC2	ARMC2	hsa-miR-143-3p	ENSG00000078808	SDF4	0
chr12_1263034_1290012:+	circERC1-1	ERC1	hsa-miR-29a-3p	ENSG00000079102	RUNX1T1	0
chr12_1263034_1290012:+	circERC1-1	ERC1	hsa-miR-29b-3p	ENSG00000079102	RUNX1T1	0
chr12_1263034_1290012:+	circERC1-1	ERC1	hsa-miR-29c-3p	ENSG00000079102	RUNX1T1	0
chr6_108854225_108876350:+	circARMC2	ARMC2	hsa-miR-136-5p	ENSG00000079459	FDFT1	0
chr6_108854225_108876350:+	circARMC2	ARMC2	hsa-miR-143-3p	ENSG00000079459	FDFT1	0
chr1_84179177_84197824:+	circPRKACB	PRKACB	hsa-miR-361-3p	ENSG00000080573	COL5A3	0
chr2_147896301_147899898:+	circACVR2A	ACVR2A	hsa-miR-509-3p	ENSG00000081277	PKP1	0
chr2_147896301_147899898:+	circACVR2A	ACVR2A	hsa-miR-486-5p	ENSG00000082175	PGR	0
chr6_108854225_108876350:+	circARMC2	ARMC2	hsa-miR-143-3p	ENSG00000082258	CCNT2	0
chr2_147896301_147899898:+	circACVR2A	ACVR2A	hsa-miR-486-5p	ENSG00000082701	GSK3B	1
chr2_147896301_147899898:+	circACVR2A	ACVR2A	hsa-miR-486-5p	ENSG00000084444	FAM234B	1
chr21_29321221_29329693:+	circBACH1	BACH1	hsa-miR-103a-3p	ENSG00000085063	CD59	0
chr21_29321221_29329693:+	circBACH1	BACH1	hsa-miR-105-5p	ENSG00000085063	CD59	0
chr21_29321221_29329693:+	circBACH1	BACH1	hsa-miR-107	ENSG00000085063	CD59	0
chr21_29321221_29329693:+	circBACH1	BACH1	hsa-miR-141-3p	ENSG00000085063	CD59	0
chr21_29321221_29329693:+	circBACH1	BACH1	hsa-miR-150-5p	ENSG00000085063	CD59	0
chr21_29321221_29329693:+	circBACH1	BACH1	hsa-miR-182-5p	ENSG00000085063	CD59	0
chr21_29321221_29329693:+	circBACH1	BACH1	hsa-miR-186-5p	ENSG00000085063	CD59	0
chr21_29321221_29329693:+	circBACH1	BACH1	hsa-miR-200a-3p	ENSG00000085063	CD59	0
chr21_29321221_29329693:+	circBACH1	BACH1	hsa-miR-214-3p	ENSG00000085063	CD59	0
chr21_29321221_29329693:+	circBACH1	BACH1	hsa-miR-223-3p	ENSG00000085063	CD59	0
chr21_29321221_29329693:+	circBACH1	BACH1	hsa-miR-23a-3p	ENSG00000085063	CD59	0
chr21_29321221_29329693:+	circBACH1	BACH1	hsa-miR-23b-3p	ENSG00000085063	CD59	0
chr21_29321221_29329693:+	circBACH1	BACH1	hsa-miR-28-3p	ENSG00000085063	CD59	0
chr21_29321221_29329693:+	circBACH1	BACH1	hsa-miR-33a-5p	ENSG00000085063	CD59	0
chr21_29321221_29329693:+	circBACH1	BACH1	hsa-miR-33b-5p	ENSG00000085063	CD59	0
chr21_29321221_29329693:+	circBACH1	BACH1	hsa-miR-4677-3p	ENSG00000085063	CD59	0
chr21_29321221_29329693:+	circBACH1	BACH1	hsa-miR-489-3p	ENSG00000085063	CD59	0
chr21_29321221_29329693:+	circBACH1	BACH1	hsa-miR-494-3p	ENSG00000085063	CD59	0
chr2_147896301_147899898:+	circACVR2A	ACVR2A	hsa-miR-486-5p	ENSG00000085415	SEH1L	0
chr6_108854225_108876350:+	circARMC2	ARMC2	hsa-miR-136-5p	ENSG00000085511	MAP3K4	0
chr2_147896301_147899898:+	circACVR2A	ACVR2A	hsa-miR-486-5p	ENSG00000085552	IGSF9	0
chr18_76849526_76881512:+	circZNF236	ZNF236	hsa-miR-124-3p	ENSG00000087152	ATXN7L3	0
chr18_76849526_76881512:+	circZNF236	ZNF236	hsa-miR-1286	ENSG00000087152	ATXN7L3	0
chr18_76849526_76881512:+	circZNF236	ZNF236	hsa-miR-145-5p	ENSG00000087152	ATXN7L3	0
chr18_76849526_76881512:+	circZNF236	ZNF236	hsa-miR-204-5p	ENSG00000087152	ATXN7L3	0
chr18_76849526_76881512:+	circZNF236	ZNF236	hsa-miR-211-5p	ENSG00000087152	ATXN7L3	0
chr18_76849526_76881512:+	circZNF236	ZNF236	hsa-miR-22-3p	ENSG00000087152	ATXN7L3	0
chr18_76849526_76881512:+	circZNF236	ZNF236	hsa-miR-23a-3p	ENSG00000087152	ATXN7L3	0
chr18_76849526_76881512:+	circZNF236	ZNF236	hsa-miR-23b-3p	ENSG00000087152	ATXN7L3	0
chr18_76849526_76881512:+	circZNF236	ZNF236	hsa-miR-299-3p	ENSG00000087152	ATXN7L3	0
chr1_77801331_77815231:+	circMIGA1	MIGA1	hsa-miR-26a-5p	ENSG00000087510	TFAP2C	0
chr1_77801331_77815231:+	circMIGA1	MIGA1	hsa-miR-26b-5p	ENSG00000087510	TFAP2C	0
chr12_1263034_1290012:+	circERC1-1	ERC1	hsa-miR-133b	ENSG00000088179	PTPN4	0
chr6_18236452_18258405:-	circDEK	DEK	hsa-miR-1271-5p	ENSG00000088448	ANKRD10	0
chr6_18236452_18258405:-	circDEK	DEK	hsa-miR-193a-3p	ENSG00000088448	ANKRD10	0
chr6_18236452_18258405:-	circDEK	DEK	hsa-miR-193b-3p	ENSG00000088448	ANKRD10	0
chr6_18236452_18258405:-	circDEK	DEK	hsa-miR-450b-5p	ENSG00000088448	ANKRD10	0
chr6_18236452_18258405:-	circDEK	DEK	hsa-miR-452-5p	ENSG00000088448	ANKRD10	0
chr21_29321221_29329693:+	circBACH1	BACH1	hsa-miR-142-5p	ENSG00000089006	SNX5	0
chr21_29321221_29329693:+	circBACH1	BACH1	hsa-miR-23a-3p	ENSG00000089006	SNX5	0
chr21_29321221_29329693:+	circBACH1	BACH1	hsa-miR-23b-3p	ENSG00000089006	SNX5	0
chr21_29321221_29329693:+	circBACH1	BACH1	hsa-miR-409-3p	ENSG00000089006	SNX5	0
chr21_29321221_29329693:+	circBACH1	BACH1	hsa-miR-103a-3p	ENSG00000090339	ICAM1	0
chr21_29321221_29329693:+	circBACH1	BACH1	hsa-miR-105-5p	ENSG00000090339	ICAM1	0
chr21_29321221_29329693:+	circBACH1	BACH1	hsa-miR-107	ENSG00000090339	ICAM1	0
chr21_29321221_29329693:+	circBACH1	BACH1	hsa-miR-141-3p	ENSG00000090339	ICAM1	0
chr21_29321221_29329693:+	circBACH1	BACH1	hsa-miR-150-5p	ENSG00000090339	ICAM1	0
chr21_29321221_29329693:+	circBACH1	BACH1	hsa-miR-200a-3p	ENSG00000090339	ICAM1	0
chr21_29321221_29329693:+	circBACH1	BACH1	hsa-miR-214-3p	ENSG00000090339	ICAM1	0
chr21_29321221_29329693:+	circBACH1	BACH1	hsa-miR-223-3p	ENSG00000090339	ICAM1	0
chr21_29321221_29329693:+	circBACH1	BACH1	hsa-miR-409-3p	ENSG00000090339	ICAM1	0
chr21_29321221_29329693:+	circBACH1	BACH1	hsa-miR-625-5p	ENSG00000090339	ICAM1	0
chr6_108854225_108876350:+	circARMC2	ARMC2	hsa-miR-143-3p	ENSG00000091009	RBM27	0
chr6_18236452_18258405:-	circDEK	DEK	hsa-miR-1271-5p	ENSG00000091428	RAPGEF4	0
chr6_18236452_18258405:-	circDEK	DEK	hsa-miR-28-3p	ENSG00000091428	RAPGEF4	0
chr6_108854225_108876350:+	circARMC2	ARMC2	hsa-miR-143-3p	ENSG00000092140	G2E3	0
chr10_50433476_50466932:-	circSGMS1	SGMS1	hsa-miR-421	ENSG00000092345	DAZL	0
chr10_50433476_50466932:-	circSGMS1	SGMS1	hsa-miR-543	ENSG00000092345	DAZL	0
chr10_50433476_50466932:-	circSGMS1	SGMS1	hsa-miR-421	ENSG00000092531	SNAP23	0
chr1_84179177_84197824:+	circPRKACB	PRKACB	hsa-miR-153-3p	ENSG00000092820	EZR	0
chr1_84179177_84197824:+	circPRKACB	PRKACB	hsa-miR-182-5p	ENSG00000092820	EZR	0
chr1_84179177_84197824:+	circPRKACB	PRKACB	hsa-miR-369-3p	ENSG00000092820	EZR	0
chr6_98899268_98927822:-	circFBXL4	FBXL4	hsa-miR-127-3p	ENSG00000093134	VNN3	0
chr6_98899268_98927822:-	circFBXL4	FBXL4	hsa-miR-584-5p	ENSG00000093134	VNN3	0
chr21_29321221_29329693:+	circBACH1	BACH1	hsa-miR-105-5p	ENSG00000095015	MAP3K1	0
chr21_29321221_29329693:+	circBACH1	BACH1	hsa-miR-142-5p	ENSG00000095015	MAP3K1	0
chr21_29321221_29329693:+	circBACH1	BACH1	hsa-miR-186-5p	ENSG00000095015	MAP3K1	0
chr21_29321221_29329693:+	circBACH1	BACH1	hsa-miR-219a-2-3p	ENSG00000095015	MAP3K1	0
chr21_29321221_29329693:+	circBACH1	BACH1	hsa-miR-2355-5p	ENSG00000095015	MAP3K1	0
chr21_29321221_29329693:+	circBACH1	BACH1	hsa-miR-23a-3p	ENSG00000095015	MAP3K1	0
chr21_29321221_29329693:+	circBACH1	BACH1	hsa-miR-23b-3p	ENSG00000095015	MAP3K1	0
chr21_29321221_29329693:+	circBACH1	BACH1	hsa-miR-33a-5p	ENSG00000095015	MAP3K1	0
chr21_29321221_29329693:+	circBACH1	BACH1	hsa-miR-33b-5p	ENSG00000095015	MAP3K1	0
chr21_29321221_29329693:+	circBACH1	BACH1	hsa-miR-409-3p	ENSG00000095015	MAP3K1	0
chr21_29321221_29329693:+	circBACH1	BACH1	hsa-miR-494-3p	ENSG00000095015	MAP3K1	0
chr2_147896301_147899898:+	circACVR2A	ACVR2A	hsa-miR-486-5p	ENSG00000095139	ARCN1	0
chr2_147896301_147899898:+	circACVR2A	ACVR2A	hsa-miR-509-3p	ENSG00000095139	ARCN1	0
chr12_1263034_1290012:+	circERC1-1	ERC1	hsa-miR-133a-3p	ENSG00000095539	SEMA4G	0
chr12_1263034_1290012:+	circERC1-1	ERC1	hsa-miR-133b	ENSG00000095539	SEMA4G	0
chr18_76849526_76881512:+	circZNF236	ZNF236	hsa-miR-181a-5p	ENSG00000095539	SEMA4G	0
chr18_76849526_76881512:+	circZNF236	ZNF236	hsa-miR-181b-5p	ENSG00000095539	SEMA4G	0
chr18_76849526_76881512:+	circZNF236	ZNF236	hsa-miR-181c-5p	ENSG00000095539	SEMA4G	0
chr18_76849526_76881512:+	circZNF236	ZNF236	hsa-miR-181d-5p	ENSG00000095539	SEMA4G	0
chr18_76849526_76881512:+	circZNF236	ZNF236	hsa-miR-345-5p	ENSG00000095539	SEMA4G	0
chr6_98899268_98927822:-	circFBXL4	FBXL4	hsa-miR-105-5p	ENSG00000096006	CRISP3	0
chr6_98899268_98927822:-	circFBXL4	FBXL4	hsa-miR-33a-5p	ENSG00000096006	CRISP3	0
chr6_98899268_98927822:-	circFBXL4	FBXL4	hsa-miR-33b-5p	ENSG00000096006	CRISP3	0
chr6_98899268_98927822:-	circFBXL4	FBXL4	hsa-miR-375	ENSG00000096006	CRISP3	0
chr6_98899268_98927822:-	circFBXL4	FBXL4	hsa-miR-450b-5p	ENSG00000096006	CRISP3	0
chr21_29321221_29329693:+	circBACH1	BACH1	hsa-miR-214-3p	ENSG00000096433	ITPR3	0
chr21_29321221_29329693:+	circBACH1	BACH1	hsa-miR-223-3p	ENSG00000096433	ITPR3	0
chr21_29321221_29329693:+	circBACH1	BACH1	hsa-miR-28-3p	ENSG00000096433	ITPR3	0
chr21_29321221_29329693:+	circBACH1	BACH1	hsa-miR-494-3p	ENSG00000096433	ITPR3	0
chr12_1263034_1290012:+	circERC1-1	ERC1	hsa-miR-133a-3p	ENSG00000099204	ABLIM1	0
chr12_1263034_1290012:+	circERC1-1	ERC1	hsa-miR-133b	ENSG00000099204	ABLIM1	0
chr12_1289852_1444750:+	circERC1-2	ERC1	hsa-miR-138-5p	ENSG00000099204	ABLIM1	0
chr12_1289852_1444750:+	circERC1-2	ERC1	hsa-miR-150-5p	ENSG00000099204	ABLIM1	0
chr12_1263034_1290012:+	circERC1-1	ERC1	hsa-miR-29a-3p	ENSG00000099204	ABLIM1	0
chr12_1263034_1290012:+	circERC1-1	ERC1	hsa-miR-29b-3p	ENSG00000099204	ABLIM1	0
chr12_1263034_1290012:+	circERC1-1	ERC1	hsa-miR-29c-3p	ENSG00000099204	ABLIM1	0
chr12_1263034_1290012:+	circERC1-1	ERC1	hsa-miR-133a-3p	ENSG00000099284	H2AFY2	0
chr12_1263034_1290012:+	circERC1-1	ERC1	hsa-miR-133b	ENSG00000099284	H2AFY2	0
chr12_1263034_1290012:+	circERC1-1	ERC1	hsa-miR-29a-3p	ENSG00000099284	H2AFY2	0
chr12_1263034_1290012:+	circERC1-1	ERC1	hsa-miR-29b-3p	ENSG00000099284	H2AFY2	0
chr12_1263034_1290012:+	circERC1-1	ERC1	hsa-miR-29c-3p	ENSG00000099284	H2AFY2	0
chr6_98899268_98927822:-	circFBXL4	FBXL4	hsa-miR-142-3p	ENSG00000099399	MAGEB2	0
chr6_98899268_98927822:-	circFBXL4	FBXL4	hsa-miR-199b-3p	ENSG00000099399	MAGEB2	0
chr2_147896301_147899898:+	circACVR2A	ACVR2A	hsa-miR-509-3p	ENSG00000099399	MAGEB2	0
chr12_1263034_1290012:+	circERC1-1	ERC1	hsa-miR-29a-3p	ENSG00000099889	ARVCF	0
chr12_1263034_1290012:+	circERC1-1	ERC1	hsa-miR-29b-3p	ENSG00000099889	ARVCF	0
chr12_1263034_1290012:+	circERC1-1	ERC1	hsa-miR-29c-3p	ENSG00000099889	ARVCF	0
chr18_76849526_76881512:+	circZNF236	ZNF236	hsa-miR-124-3p	ENSG00000099954	CECR2	0
chr18_76849526_76881512:+	circZNF236	ZNF236	hsa-miR-145-5p	ENSG00000099954	CECR2	0
chr18_76849526_76881512:+	circZNF236	ZNF236	hsa-miR-181a-5p	ENSG00000099954	CECR2	0
chr18_76849526_76881512:+	circZNF236	ZNF236	hsa-miR-181b-5p	ENSG00000099954	CECR2	0
chr18_76849526_76881512:+	circZNF236	ZNF236	hsa-miR-181c-5p	ENSG00000099954	CECR2	0
chr18_76849526_76881512:+	circZNF236	ZNF236	hsa-miR-181d-5p	ENSG00000099954	CECR2	0
chr18_76849526_76881512:+	circZNF236	ZNF236	hsa-miR-204-5p	ENSG00000099954	CECR2	0
chr18_76849526_76881512:+	circZNF236	ZNF236	hsa-miR-211-5p	ENSG00000099954	CECR2	0
chr18_76849526_76881512:+	circZNF236	ZNF236	hsa-miR-22-3p	ENSG00000099954	CECR2	0
chr12_1263034_1290012:+	circERC1-1	ERC1	hsa-miR-29a-3p	ENSG00000099954	CECR2	0
chr12_1263034_1290012:+	circERC1-1	ERC1	hsa-miR-29b-3p	ENSG00000099954	CECR2	0
chr12_1263034_1290012:+	circERC1-1	ERC1	hsa-miR-29c-3p	ENSG00000099954	CECR2	0
chr18_76849526_76881512:+	circZNF236	ZNF236	hsa-miR-345-5p	ENSG00000099954	CECR2	0
chr2_147896301_147899898:+	circACVR2A	ACVR2A	hsa-miR-486-5p	ENSG00000100234	TIMP3	0
chr21_29321221_29329693:+	circBACH1	BACH1	hsa-miR-15a-5p	ENSG00000100342	APOL1	0
chr21_29321221_29329693:+	circBACH1	BACH1	hsa-miR-214-3p	ENSG00000100342	APOL1	0
chr6_108854225_108876350:+	circARMC2	ARMC2	hsa-miR-143-3p	ENSG00000100364	KIAA0930	0
chr18_76849526_76881512:+	circZNF236	ZNF236	hsa-miR-124-3p	ENSG00000100426	ZBED4	0
chr18_76849526_76881512:+	circZNF236	ZNF236	hsa-miR-204-5p	ENSG00000100426	ZBED4	0
chr18_76849526_76881512:+	circZNF236	ZNF236	hsa-miR-211-5p	ENSG00000100426	ZBED4	0
chr18_76849526_76881512:+	circZNF236	ZNF236	hsa-miR-23a-3p	ENSG00000100426	ZBED4	0
chr18_76849526_76881512:+	circZNF236	ZNF236	hsa-miR-23b-3p	ENSG00000100426	ZBED4	0
chr18_76849526_76881512:+	circZNF236	ZNF236	hsa-miR-345-5p	ENSG00000100426	ZBED4	0
chr18_76849526_76881512:+	circZNF236	ZNF236	hsa-miR-582-5p	ENSG00000100426	ZBED4	0
chr12_1263034_1290012:+	circERC1-1	ERC1	hsa-miR-133a-3p	ENSG00000100441	KHNYN	0
chr12_1263034_1290012:+	circERC1-1	ERC1	hsa-miR-133b	ENSG00000100441	KHNYN	0
chr12_1263034_1290012:+	circERC1-1	ERC1	hsa-miR-29a-3p	ENSG00000100441	KHNYN	0
chr12_1263034_1290012:+	circERC1-1	ERC1	hsa-miR-29b-3p	ENSG00000100441	KHNYN	0
chr12_1263034_1290012:+	circERC1-1	ERC1	hsa-miR-29c-3p	ENSG00000100441	KHNYN	0
chr12_1263034_1290012:+	circERC1-1	ERC1	hsa-miR-29a-3p	ENSG00000100647	SUSD6	0
chr12_1263034_1290012:+	circERC1-1	ERC1	hsa-miR-29b-3p	ENSG00000100647	SUSD6	0
chr12_1263034_1290012:+	circERC1-1	ERC1	hsa-miR-29c-3p	ENSG00000100647	SUSD6	0
chr6_108854225_108876350:+	circARMC2	ARMC2	hsa-miR-143-3p	ENSG00000100722	ZC3H14	0
chr3_129880309_129880559:-	circTMCC1	TMCC1	hsa-miR-376c-3p	ENSG00000100804	PSMB5	0
chr3_129880309_129880559:-	circTMCC1	TMCC1	hsa-miR-20a-5p	ENSG00000100938	GMPR2	0
chr6_108854225_108876350:+	circARMC2	ARMC2	hsa-miR-136-5p	ENSG00000100941	PNN	0
chr12_1289852_1444750:+	circERC1-2	ERC1	hsa-miR-150-5p	ENSG00000101004	NINL	0
chr12_1263034_1290012:+	circERC1-1	ERC1	hsa-miR-29a-3p	ENSG00000101004	NINL	0
chr12_1263034_1290012:+	circERC1-1	ERC1	hsa-miR-29b-3p	ENSG00000101004	NINL	0
chr12_1263034_1290012:+	circERC1-1	ERC1	hsa-miR-29c-3p	ENSG00000101004	NINL	0
chr6_108854225_108876350:+	circARMC2	ARMC2	hsa-miR-136-5p	ENSG00000101109	STK4	0
chr6_108854225_108876350:+	circARMC2	ARMC2	hsa-miR-143-3p	ENSG00000101109	STK4	0
chr1_84179177_84197824:+	circPRKACB	PRKACB	hsa-miR-200b-3p	ENSG00000101144	BMP7	0
chr1_84179177_84197824:+	circPRKACB	PRKACB	hsa-miR-429	ENSG00000101144	BMP7	0
chr6_108854225_108876350:+	circARMC2	ARMC2	hsa-miR-143-3p	ENSG00000101146	RAE1	0
chr2_147896301_147899898:+	circACVR2A	ACVR2A	hsa-miR-509-3p	ENSG00000101323	HAO1	0
chr5_65567513_65572286:+	circPPWD1	PPWD1	hsa-miR-145-5p	ENSG00000101417	PXMP4	0
chr5_65567513_65572286:+	circPPWD1	PPWD1	hsa-miR-15a-5p	ENSG00000101417	PXMP4	0
chr5_65567513_65572286:+	circPPWD1	PPWD1	hsa-miR-15b-5p	ENSG00000101417	PXMP4	0
chr5_65567513_65572286:+	circPPWD1	PPWD1	hsa-miR-16-5p	ENSG00000101417	PXMP4	0
chr5_65567513_65572286:+	circPPWD1	PPWD1	hsa-miR-195-5p	ENSG00000101417	PXMP4	0
chr5_65567513_65572286:+	circPPWD1	PPWD1	hsa-miR-223-3p	ENSG00000101417	PXMP4	0
chr5_65567513_65572286:+	circPPWD1	PPWD1	hsa-miR-3200-5p	ENSG00000101417	PXMP4	0
chr5_65567513_65572286:+	circPPWD1	PPWD1	hsa-miR-331-3p	ENSG00000101417	PXMP4	0
chr5_65567513_65572286:+	circPPWD1	PPWD1	hsa-miR-342-3p	ENSG00000101417	PXMP4	0
chr5_65567513_65572286:+	circPPWD1	PPWD1	hsa-miR-424-5p	ENSG00000101417	PXMP4	0
chr5_65567513_65572286:+	circPPWD1	PPWD1	hsa-miR-486-5p	ENSG00000101417	PXMP4	0
chr5_65567513_65572286:+	circPPWD1	PPWD1	hsa-miR-497-5p	ENSG00000101417	PXMP4	0
chr5_65567513_65572286:+	circPPWD1	PPWD1	hsa-miR-629-5p	ENSG00000101417	PXMP4	0
chr1_84179177_84197824:+	circPRKACB	PRKACB	hsa-miR-153-3p	ENSG00000101439	CST3	0
chr6_98899268_98927822:-	circFBXL4	FBXL4	hsa-miR-153-3p	ENSG00000101439	CST3	0
chr6_98899268_98927822:-	circFBXL4	FBXL4	hsa-miR-628-5p	ENSG00000101439	CST3	0
chr6_98899268_98927822:-	circFBXL4	FBXL4	hsa-miR-185-5p	ENSG00000101441	CST4	0
chr6_108854225_108876350:+	circARMC2	ARMC2	hsa-miR-136-5p	ENSG00000101544	ADNP2	0
chr12_1263034_1290012:+	circERC1-1	ERC1	hsa-miR-29a-3p	ENSG00000101624	CEP76	0
chr12_1263034_1290012:+	circERC1-1	ERC1	hsa-miR-29b-3p	ENSG00000101624	CEP76	0
chr12_1263034_1290012:+	circERC1-1	ERC1	hsa-miR-29c-3p	ENSG00000101624	CEP76	0
chr12_1263034_1290012:+	circERC1-1	ERC1	hsa-miR-29a-3p	ENSG00000101752	MIB1	0
chr12_1263034_1290012:+	circERC1-1	ERC1	hsa-miR-29b-3p	ENSG00000101752	MIB1	0
chr12_1263034_1290012:+	circERC1-1	ERC1	hsa-miR-29c-3p	ENSG00000101752	MIB1	0
chr12_1263034_1290012:+	circERC1-1	ERC1	hsa-miR-133a-3p	ENSG00000101871	MID1	0
chr12_1263034_1290012:+	circERC1-1	ERC1	hsa-miR-133b	ENSG00000101871	MID1	0
chr6_98899268_98927822:-	circFBXL4	FBXL4	hsa-miR-33a-5p	ENSG00000101981	F9	0
chr6_108854225_108876350:+	circARMC2	ARMC2	hsa-miR-143-3p	ENSG00000102189	EEA1	0
chr6_18236452_18258405:-	circDEK	DEK	hsa-miR-1271-5p	ENSG00000102710	SUPT20H	0
chr6_108854225_108876350:+	circARMC2	ARMC2	hsa-miR-136-5p	ENSG00000102804	TSC22D1	0
chr6_108854225_108876350:+	circARMC2	ARMC2	hsa-miR-136-5p	ENSG00000102908	NFAT5	0
chr6_108854225_108876350:+	circARMC2	ARMC2	hsa-miR-143-3p	ENSG00000102908	NFAT5	0
chr2_147896301_147899898:+	circACVR2A	ACVR2A	hsa-miR-486-5p	ENSG00000102910	LONP2	0
chr2_147896301_147899898:+	circACVR2A	ACVR2A	hsa-miR-509-3p	ENSG00000102910	LONP2	0
chr12_1289852_1444750:+	circERC1-2	ERC1	hsa-miR-150-5p	ENSG00000103175	WFDC1	0
chr12_1263034_1290012:+	circERC1-1	ERC1	hsa-miR-29a-3p	ENSG00000103264	FBXO31	0
chr12_1263034_1290012:+	circERC1-1	ERC1	hsa-miR-29b-3p	ENSG00000103264	FBXO31	0
chr12_1263034_1290012:+	circERC1-1	ERC1	hsa-miR-29c-3p	ENSG00000103264	FBXO31	0
chr2_147896301_147899898:+	circACVR2A	ACVR2A	hsa-miR-486-5p	ENSG00000103353	UBFD1	1
chr6_98899268_98927822:-	circFBXL4	FBXL4	hsa-miR-105-5p	ENSG00000104067	TJP1	0
chr6_98899268_98927822:-	circFBXL4	FBXL4	hsa-miR-142-3p	ENSG00000104067	TJP1	0
chr6_98899268_98927822:-	circFBXL4	FBXL4	hsa-miR-149-5p	ENSG00000104067	TJP1	0
chr6_98899268_98927822:-	circFBXL4	FBXL4	hsa-miR-153-3p	ENSG00000104067	TJP1	0
chr6_98899268_98927822:-	circFBXL4	FBXL4	hsa-miR-185-5p	ENSG00000104067	TJP1	0
chr6_98899268_98927822:-	circFBXL4	FBXL4	hsa-miR-199b-3p	ENSG00000104067	TJP1	0
chr6_98899268_98927822:-	circFBXL4	FBXL4	hsa-miR-24-3p	ENSG00000104067	TJP1	0
chr6_98899268_98927822:-	circFBXL4	FBXL4	hsa-miR-33a-5p	ENSG00000104067	TJP1	0
chr6_98899268_98927822:-	circFBXL4	FBXL4	hsa-miR-33b-5p	ENSG00000104067	TJP1	0
chr6_98899268_98927822:-	circFBXL4	FBXL4	hsa-miR-374a-5p	ENSG00000104067	TJP1	0
chr6_98899268_98927822:-	circFBXL4	FBXL4	hsa-miR-374b-5p	ENSG00000104067	TJP1	0
chr6_98899268_98927822:-	circFBXL4	FBXL4	hsa-miR-450b-5p	ENSG00000104067	TJP1	0
chr6_98899268_98927822:-	circFBXL4	FBXL4	hsa-miR-584-5p	ENSG00000104067	TJP1	0
chr6_98899268_98927822:-	circFBXL4	FBXL4	hsa-miR-628-5p	ENSG00000104067	TJP1	0
chr2_147896301_147899898:+	circACVR2A	ACVR2A	hsa-miR-486-5p	ENSG00000104177	MYEF2	0
chr21_29321221_29329693:+	circBACH1	BACH1	hsa-miR-105-5p	ENSG00000104368	PLAT	0
chr21_29321221_29329693:+	circBACH1	BACH1	hsa-miR-142-5p	ENSG00000104368	PLAT	0
chr21_29321221_29329693:+	circBACH1	BACH1	hsa-miR-33a-5p	ENSG00000104368	PLAT	0
chr21_29321221_29329693:+	circBACH1	BACH1	hsa-miR-33b-5p	ENSG00000104368	PLAT	0
chr6_108854225_108876350:+	circARMC2	ARMC2	hsa-miR-136-5p	ENSG00000104517	UBR5	0
chr21_29321221_29329693:+	circBACH1	BACH1	hsa-miR-150-5p	ENSG00000104689	TNFRSF10A	0
chr18_76849526_76881512:+	circZNF236	ZNF236	hsa-miR-22-3p	ENSG00000104731	KLHDC4	0
chr18_76849526_76881512:+	circZNF236	ZNF236	hsa-miR-345-5p	ENSG00000104731	KLHDC4	0
chr2_147896301_147899898:+	circACVR2A	ACVR2A	hsa-miR-486-5p	ENSG00000105220	GPI	1
chr2_147896301_147899898:+	circACVR2A	ACVR2A	hsa-miR-486-5p	ENSG00000105879	CBLL1	0
chr21_29321221_29329693:+	circBACH1	BACH1	hsa-miR-105-5p	ENSG00000105971	CAV2	0
chr21_29321221_29329693:+	circBACH1	BACH1	hsa-miR-142-5p	ENSG00000105971	CAV2	0
chr21_29321221_29329693:+	circBACH1	BACH1	hsa-miR-150-5p	ENSG00000105971	CAV2	0
chr21_29321221_29329693:+	circBACH1	BACH1	hsa-miR-186-5p	ENSG00000105971	CAV2	0
chr21_29321221_29329693:+	circBACH1	BACH1	hsa-miR-28-3p	ENSG00000105971	CAV2	0
chr21_29321221_29329693:+	circBACH1	BACH1	hsa-miR-409-3p	ENSG00000105971	CAV2	0
chr21_29321221_29329693:+	circBACH1	BACH1	hsa-miR-494-3p	ENSG00000105971	CAV2	0
chr21_29321221_29329693:+	circBACH1	BACH1	hsa-miR-103a-3p	ENSG00000105974	CAV1	0
chr21_29321221_29329693:+	circBACH1	BACH1	hsa-miR-107	ENSG00000105974	CAV1	0
chr21_29321221_29329693:+	circBACH1	BACH1	hsa-miR-142-5p	ENSG00000105974	CAV1	0
chr21_29321221_29329693:+	circBACH1	BACH1	hsa-miR-182-5p	ENSG00000105974	CAV1	0
chr21_29321221_29329693:+	circBACH1	BACH1	hsa-miR-409-3p	ENSG00000105974	CAV1	0
chr21_29321221_29329693:+	circBACH1	BACH1	hsa-miR-494-3p	ENSG00000105974	CAV1	0
chr21_29321221_29329693:+	circBACH1	BACH1	hsa-miR-625-5p	ENSG00000105974	CAV1	0
chr6_98899268_98927822:-	circFBXL4	FBXL4	hsa-miR-1307-3p	ENSG00000105991	HOXA1	0
chr6_98899268_98927822:-	circFBXL4	FBXL4	hsa-miR-142-3p	ENSG00000105991	HOXA1	0
chr6_98899268_98927822:-	circFBXL4	FBXL4	hsa-miR-185-5p	ENSG00000105991	HOXA1	0
chr6_98899268_98927822:-	circFBXL4	FBXL4	hsa-miR-24-3p	ENSG00000105991	HOXA1	0
chr6_98899268_98927822:-	circFBXL4	FBXL4	hsa-miR-378a-3p	ENSG00000105991	HOXA1	0
chr6_98899268_98927822:-	circFBXL4	FBXL4	hsa-miR-378d	ENSG00000105991	HOXA1	0
chr6_98899268_98927822:-	circFBXL4	FBXL4	hsa-miR-499a-5p	ENSG00000105991	HOXA1	0
chr6_98899268_98927822:-	circFBXL4	FBXL4	hsa-miR-185-5p	ENSG00000106003	LFNG	0
chr1_84179177_84197824:+	circPRKACB	PRKACB	hsa-miR-200b-3p	ENSG00000106003	LFNG	0
chr6_98899268_98927822:-	circFBXL4	FBXL4	hsa-miR-24-3p	ENSG00000106003	LFNG	0
chr1_84179177_84197824:+	circPRKACB	PRKACB	hsa-miR-361-3p	ENSG00000106003	LFNG	0
chr1_84179177_84197824:+	circPRKACB	PRKACB	hsa-miR-429	ENSG00000106003	LFNG	0
chr6_98899268_98927822:-	circFBXL4	FBXL4	hsa-miR-450b-5p	ENSG00000106003	LFNG	0
chr6_98899268_98927822:-	circFBXL4	FBXL4	hsa-miR-628-5p	ENSG00000106003	LFNG	0
chr18_56758865_56781656:+	circWDR7	WDR7	hsa-miR-128-3p	ENSG00000106415	GLCCI1	0
chr18_56758865_56781656:+	circWDR7	WDR7	hsa-miR-135a-5p	ENSG00000106415	GLCCI1	0
chr18_56758865_56781656:+	circWDR7	WDR7	hsa-miR-135b-5p	ENSG00000106415	GLCCI1	0
chr18_56758865_56781656:+	circWDR7	WDR7	hsa-miR-153-3p	ENSG00000106415	GLCCI1	0
chr18_56758865_56781656:+	circWDR7	WDR7	hsa-miR-345-5p	ENSG00000106415	GLCCI1	0
chr12_48939655_48941188:-	circAC073610.3,ARF3	AC073610.3,ARF3	hsa-miR-320a	ENSG00000106477	CEP41	0
chr12_48939655_48941188:-	circAC073610.3,ARF3	AC073610.3,ARF3	hsa-miR-320b	ENSG00000106477	CEP41	0
chr12_48939655_48941188:-	circAC073610.3,ARF3	AC073610.3,ARF3	hsa-miR-320c	ENSG00000106477	CEP41	0
chr12_48939655_48941188:-	circAC073610.3,ARF3	AC073610.3,ARF3	hsa-miR-320d	ENSG00000106477	CEP41	0
chr6_98899268_98927822:-	circFBXL4	FBXL4	hsa-miR-153-3p	ENSG00000106571	GLI3	0
chr6_98899268_98927822:-	circFBXL4	FBXL4	hsa-miR-24-3p	ENSG00000106571	GLI3	0
chr6_98899268_98927822:-	circFBXL4	FBXL4	hsa-miR-374a-5p	ENSG00000106571	GLI3	0
chr6_98899268_98927822:-	circFBXL4	FBXL4	hsa-miR-374b-5p	ENSG00000106571	GLI3	0
chr6_98899268_98927822:-	circFBXL4	FBXL4	hsa-miR-489-3p	ENSG00000106571	GLI3	0
chr6_98899268_98927822:-	circFBXL4	FBXL4	hsa-miR-105-5p	ENSG00000107485	GATA3	0
chr18_56758865_56781656:+	circWDR7	WDR7	hsa-miR-128-3p	ENSG00000107485	GATA3	0
chr18_56758865_56781656:+	circWDR7	WDR7	hsa-miR-135a-5p	ENSG00000107485	GATA3	0
chr18_56758865_56781656:+	circWDR7	WDR7	hsa-miR-135b-5p	ENSG00000107485	GATA3	0
chr6_98899268_98927822:-	circFBXL4	FBXL4	hsa-miR-182-5p	ENSG00000107485	GATA3	0
chr6_98899268_98927822:-	circFBXL4	FBXL4	hsa-miR-374a-5p	ENSG00000107485	GATA3	0
chr6_98899268_98927822:-	circFBXL4	FBXL4	hsa-miR-374b-5p	ENSG00000107485	GATA3	0
chr6_98899268_98927822:-	circFBXL4	FBXL4	hsa-miR-375	ENSG00000107485	GATA3	0
chr6_98899268_98927822:-	circFBXL4	FBXL4	hsa-miR-450b-5p	ENSG00000107485	GATA3	0
chr6_98899268_98927822:-	circFBXL4	FBXL4	hsa-miR-489-3p	ENSG00000107485	GATA3	0
chr6_98899268_98927822:-	circFBXL4	FBXL4	hsa-miR-499a-5p	ENSG00000107485	GATA3	0
chr1_84179177_84197824:+	circPRKACB	PRKACB	hsa-miR-153-3p	ENSG00000107562	CXCL12	0
chr1_84179177_84197824:+	circPRKACB	PRKACB	hsa-miR-182-5p	ENSG00000107562	CXCL12	0
chr1_84179177_84197824:+	circPRKACB	PRKACB	hsa-miR-200b-3p	ENSG00000107562	CXCL12	0
chr1_84179177_84197824:+	circPRKACB	PRKACB	hsa-miR-3200-5p	ENSG00000107562	CXCL12	0
chr1_84179177_84197824:+	circPRKACB	PRKACB	hsa-miR-361-3p	ENSG00000107562	CXCL12	0
chr1_84179177_84197824:+	circPRKACB	PRKACB	hsa-miR-369-3p	ENSG00000107562	CXCL12	0
chr1_84179177_84197824:+	circPRKACB	PRKACB	hsa-miR-429	ENSG00000107562	CXCL12	0
chr10_14896846_14897517:+	circSUV39H2	SUV39H2	hsa-miR-450b-5p	ENSG00000107669	ATE1	0
chr10_14896846_14897517:+	circSUV39H2	SUV39H2	hsa-miR-541-3p	ENSG00000107669	ATE1	0
chr2_147896301_147899898:+	circACVR2A	ACVR2A	hsa-miR-486-5p	ENSG00000107771	CCSER2	0
chr2_147896301_147899898:+	circACVR2A	ACVR2A	hsa-miR-486-5p	ENSG00000107929	LARP4B	0
chr16_24092791_24123981:+	circPRKCB	PRKCB	hsa-miR-22-3p	ENSG00000107957	SH3PXD2A	0
chr16_24092791_24123981:+	circPRKCB	PRKCB	hsa-miR-2355-5p	ENSG00000107957	SH3PXD2A	0
chr16_24092791_24123981:+	circPRKCB	PRKCB	hsa-miR-29a-3p	ENSG00000107957	SH3PXD2A	0
chr16_24092791_24123981:+	circPRKCB	PRKCB	hsa-miR-29b-3p	ENSG00000107957	SH3PXD2A	0
chr16_24092791_24123981:+	circPRKCB	PRKCB	hsa-miR-29c-3p	ENSG00000107957	SH3PXD2A	0
chr10_14896846_14897517:+	circSUV39H2	SUV39H2	hsa-miR-577	ENSG00000108561	C1QBP	0
chr2_147896301_147899898:+	circACVR2A	ACVR2A	hsa-miR-486-5p	ENSG00000108924	HLF	1
chr6_98899268_98927822:-	circFBXL4	FBXL4	hsa-miR-105-5p	ENSG00000109062	SLC9A3R1	0
chr6_98899268_98927822:-	circFBXL4	FBXL4	hsa-miR-1307-3p	ENSG00000109062	SLC9A3R1	0
chr6_98899268_98927822:-	circFBXL4	FBXL4	hsa-miR-149-5p	ENSG00000109062	SLC9A3R1	0
chr6_98899268_98927822:-	circFBXL4	FBXL4	hsa-miR-24-3p	ENSG00000109062	SLC9A3R1	0
chr6_98899268_98927822:-	circFBXL4	FBXL4	hsa-miR-378a-3p	ENSG00000109062	SLC9A3R1	0
chr6_98899268_98927822:-	circFBXL4	FBXL4	hsa-miR-628-5p	ENSG00000109062	SLC9A3R1	0
chr6_98899268_98927822:-	circFBXL4	FBXL4	hsa-miR-24-3p	ENSG00000109101	FOXN1	0
chr1_77801331_77815231:+	circMIGA1	MIGA1	hsa-miR-26a-5p	ENSG00000109101	FOXN1	0
chr1_77801331_77815231:+	circMIGA1	MIGA1	hsa-miR-26b-5p	ENSG00000109101	FOXN1	0
chr2_147896301_147899898:+	circACVR2A	ACVR2A	hsa-miR-486-5p	ENSG00000109685	NSD2	0
chr2_147896301_147899898:+	circACVR2A	ACVR2A	hsa-miR-509-3p	ENSG00000109705	NKX3-2	0
chr18_76849526_76881512:+	circZNF236	ZNF236	hsa-miR-1286	ENSG00000109956	B3GAT1	0
chr18_76849526_76881512:+	circZNF236	ZNF236	hsa-miR-218-5p	ENSG00000109956	B3GAT1	0
chr12_1263034_1290012:+	circERC1-1	ERC1	hsa-miR-133a-3p	ENSG00000110047	EHD1	0
chr12_1263034_1290012:+	circERC1-1	ERC1	hsa-miR-133b	ENSG00000110047	EHD1	0
chr12_1263034_1290012:+	circERC1-1	ERC1	hsa-miR-29a-3p	ENSG00000110066	KMT5B	0
chr12_1263034_1290012:+	circERC1-1	ERC1	hsa-miR-29b-3p	ENSG00000110066	KMT5B	0
chr12_1263034_1290012:+	circERC1-1	ERC1	hsa-miR-29c-3p	ENSG00000110066	KMT5B	0
chr6_98899268_98927822:-	circFBXL4	FBXL4	hsa-miR-142-3p	ENSG00000110090	CPT1A	0
chr6_98899268_98927822:-	circFBXL4	FBXL4	hsa-miR-149-5p	ENSG00000110090	CPT1A	0
chr6_98899268_98927822:-	circFBXL4	FBXL4	hsa-miR-185-5p	ENSG00000110090	CPT1A	0
chr6_98899268_98927822:-	circFBXL4	FBXL4	hsa-miR-33a-5p	ENSG00000110090	CPT1A	0
chr6_98899268_98927822:-	circFBXL4	FBXL4	hsa-miR-33b-5p	ENSG00000110090	CPT1A	0
chr6_98899268_98927822:-	circFBXL4	FBXL4	hsa-miR-375	ENSG00000110090	CPT1A	0
chr6_98899268_98927822:-	circFBXL4	FBXL4	hsa-miR-450b-5p	ENSG00000110090	CPT1A	0
chr18_56758865_56781656:+	circWDR7	WDR7	hsa-miR-103a-3p	ENSG00000110344	UBE4A	0
chr18_56758865_56781656:+	circWDR7	WDR7	hsa-miR-107	ENSG00000110344	UBE4A	0
chr18_56758865_56781656:+	circWDR7	WDR7	hsa-miR-128-3p	ENSG00000110344	UBE4A	0
chr18_56758865_56781656:+	circWDR7	WDR7	hsa-miR-135a-5p	ENSG00000110344	UBE4A	0
chr18_56758865_56781656:+	circWDR7	WDR7	hsa-miR-135b-5p	ENSG00000110344	UBE4A	0
chr18_56758865_56781656:+	circWDR7	WDR7	hsa-miR-148a-3p	ENSG00000110344	UBE4A	0
chr18_56758865_56781656:+	circWDR7	WDR7	hsa-miR-148b-3p	ENSG00000110344	UBE4A	0
chr18_56758865_56781656:+	circWDR7	WDR7	hsa-miR-152-3p	ENSG00000110344	UBE4A	0
chr18_56758865_56781656:+	circWDR7	WDR7	hsa-miR-153-3p	ENSG00000110344	UBE4A	0
chr12_1289852_1444750:+	circERC1-2	ERC1	hsa-miR-1301-3p	ENSG00000110723	EXPH5	0
chr6_98899268_98927822:-	circFBXL4	FBXL4	hsa-miR-182-5p	ENSG00000110777	POU2AF1	0
chr6_98899268_98927822:-	circFBXL4	FBXL4	hsa-miR-185-5p	ENSG00000110777	POU2AF1	0
chr6_98899268_98927822:-	circFBXL4	FBXL4	hsa-miR-24-3p	ENSG00000110777	POU2AF1	0
chr6_98899268_98927822:-	circFBXL4	FBXL4	hsa-miR-374a-5p	ENSG00000110777	POU2AF1	0
chr6_98899268_98927822:-	circFBXL4	FBXL4	hsa-miR-374b-5p	ENSG00000110777	POU2AF1	0
chr6_98899268_98927822:-	circFBXL4	FBXL4	hsa-miR-375	ENSG00000110777	POU2AF1	0
chr6_98899268_98927822:-	circFBXL4	FBXL4	hsa-miR-489-3p	ENSG00000110777	POU2AF1	0
chr2_147896301_147899898:+	circACVR2A	ACVR2A	hsa-miR-486-5p	ENSG00000110851	PRDM4	0
chr21_29321221_29329693:+	circBACH1	BACH1	hsa-miR-2355-5p	ENSG00000110852	CLEC2B	0
chr21_29321221_29329693:+	circBACH1	BACH1	hsa-miR-409-3p	ENSG00000110852	CLEC2B	0
chr12_1289852_1444750:+	circERC1-2	ERC1	hsa-miR-150-5p	ENSG00000110887	DAO	0
chr18_76849526_76881512:+	circZNF236	ZNF236	hsa-miR-1286	ENSG00000110900	TSPAN11	0
chr6_108854225_108876350:+	circARMC2	ARMC2	hsa-miR-143-3p	ENSG00000111011	RSRC2	0
chr6_98899268_98927822:-	circFBXL4	FBXL4	hsa-miR-105-5p	ENSG00000111181	SLC6A12	0
chr6_98899268_98927822:-	circFBXL4	FBXL4	hsa-miR-374a-5p	ENSG00000111275	ALDH2	0
chr6_98899268_98927822:-	circFBXL4	FBXL4	hsa-miR-374b-5p	ENSG00000111275	ALDH2	0
chr6_98899268_98927822:-	circFBXL4	FBXL4	hsa-miR-628-5p	ENSG00000111275	ALDH2	0
chr6_98899268_98927822:-	circFBXL4	FBXL4	hsa-miR-105-5p	ENSG00000111319	SCNN1A	0
chr18_56758865_56781656:+	circWDR7	WDR7	hsa-miR-135a-5p	ENSG00000111319	SCNN1A	0
chr18_56758865_56781656:+	circWDR7	WDR7	hsa-miR-135b-5p	ENSG00000111319	SCNN1A	0
chr6_98899268_98927822:-	circFBXL4	FBXL4	hsa-miR-584-5p	ENSG00000111319	SCNN1A	0
chr6_108854225_108876350:+	circARMC2	ARMC2	hsa-miR-136-5p	ENSG00000111361	EIF2B1	0
chr21_29321221_29329693:+	circBACH1	BACH1	hsa-miR-105-5p	ENSG00000111450	STX2	0
chr21_29321221_29329693:+	circBACH1	BACH1	hsa-miR-141-3p	ENSG00000111450	STX2	0
chr21_29321221_29329693:+	circBACH1	BACH1	hsa-miR-142-5p	ENSG00000111450	STX2	0
chr21_29321221_29329693:+	circBACH1	BACH1	hsa-miR-186-5p	ENSG00000111450	STX2	0
chr21_29321221_29329693:+	circBACH1	BACH1	hsa-miR-200a-3p	ENSG00000111450	STX2	0
chr21_29321221_29329693:+	circBACH1	BACH1	hsa-miR-219a-2-3p	ENSG00000111450	STX2	0
chr21_29321221_29329693:+	circBACH1	BACH1	hsa-miR-23a-3p	ENSG00000111450	STX2	0
chr21_29321221_29329693:+	circBACH1	BACH1	hsa-miR-23b-3p	ENSG00000111450	STX2	0
chr21_29321221_29329693:+	circBACH1	BACH1	hsa-miR-409-3p	ENSG00000111450	STX2	0
chr21_29321221_29329693:+	circBACH1	BACH1	hsa-miR-425-5p	ENSG00000111450	STX2	0
chr6_98899268_98927822:-	circFBXL4	FBXL4	hsa-miR-105-5p	ENSG00000111707	SUDS3	0
chr6_98899268_98927822:-	circFBXL4	FBXL4	hsa-miR-149-5p	ENSG00000111707	SUDS3	0
chr6_98899268_98927822:-	circFBXL4	FBXL4	hsa-miR-185-5p	ENSG00000111707	SUDS3	0
chr6_98899268_98927822:-	circFBXL4	FBXL4	hsa-miR-21-5p	ENSG00000111707	SUDS3	0
chr6_98899268_98927822:-	circFBXL4	FBXL4	hsa-miR-33a-5p	ENSG00000111707	SUDS3	0
chr6_98899268_98927822:-	circFBXL4	FBXL4	hsa-miR-33b-5p	ENSG00000111707	SUDS3	0
chr6_98899268_98927822:-	circFBXL4	FBXL4	hsa-miR-375	ENSG00000111707	SUDS3	0
chr6_98899268_98927822:-	circFBXL4	FBXL4	hsa-miR-378a-3p	ENSG00000111707	SUDS3	0
chr6_98899268_98927822:-	circFBXL4	FBXL4	hsa-miR-450b-5p	ENSG00000111707	SUDS3	0
chr6_98899268_98927822:-	circFBXL4	FBXL4	hsa-miR-499a-5p	ENSG00000111707	SUDS3	0
chr6_98899268_98927822:-	circFBXL4	FBXL4	hsa-miR-584-5p	ENSG00000111707	SUDS3	0
chr6_98899268_98927822:-	circFBXL4	FBXL4	hsa-miR-590-5p	ENSG00000111707	SUDS3	0
chr2_147896301_147899898:+	circACVR2A	ACVR2A	hsa-miR-509-3p	ENSG00000111732	AICDA	0
chr12_1263034_1290012:+	circERC1-1	ERC1	hsa-miR-133a-3p	ENSG00000111846	GCNT2	0
chr12_1263034_1290012:+	circERC1-1	ERC1	hsa-miR-133b	ENSG00000111846	GCNT2	0
chr12_1263034_1290012:+	circERC1-1	ERC1	hsa-miR-29a-3p	ENSG00000111846	GCNT2	0
chr12_1263034_1290012:+	circERC1-1	ERC1	hsa-miR-29b-3p	ENSG00000111846	GCNT2	0
chr12_1263034_1290012:+	circERC1-1	ERC1	hsa-miR-29c-3p	ENSG00000111846	GCNT2	0
chr6_98899268_98927822:-	circFBXL4	FBXL4	hsa-miR-105-5p	ENSG00000111912	NCOA7	0
chr6_98899268_98927822:-	circFBXL4	FBXL4	hsa-miR-153-3p	ENSG00000111912	NCOA7	0
chr6_98899268_98927822:-	circFBXL4	FBXL4	hsa-miR-33a-5p	ENSG00000111912	NCOA7	0
chr6_98899268_98927822:-	circFBXL4	FBXL4	hsa-miR-33b-5p	ENSG00000111912	NCOA7	0
chr6_98899268_98927822:-	circFBXL4	FBXL4	hsa-miR-374a-5p	ENSG00000111912	NCOA7	0
chr6_98899268_98927822:-	circFBXL4	FBXL4	hsa-miR-374b-5p	ENSG00000111912	NCOA7	0
chr6_98899268_98927822:-	circFBXL4	FBXL4	hsa-miR-375	ENSG00000111912	NCOA7	0
chr6_98899268_98927822:-	circFBXL4	FBXL4	hsa-miR-450b-5p	ENSG00000111912	NCOA7	0
chr6_98899268_98927822:-	circFBXL4	FBXL4	hsa-miR-499a-5p	ENSG00000111912	NCOA7	0
chr6_98899268_98927822:-	circFBXL4	FBXL4	hsa-miR-628-5p	ENSG00000111912	NCOA7	0
chr10_50433476_50466932:-	circSGMS1	SGMS1	hsa-miR-452-5p	ENSG00000111981	ULBP1	0
chr6_18236452_18258405:-	circDEK	DEK	hsa-miR-129-5p	ENSG00000112062	MAPK14	0
chr6_18236452_18258405:-	circDEK	DEK	hsa-miR-193a-3p	ENSG00000112062	MAPK14	0
chr6_18236452_18258405:-	circDEK	DEK	hsa-miR-193b-3p	ENSG00000112062	MAPK14	0
chr6_18236452_18258405:-	circDEK	DEK	hsa-miR-33a-5p	ENSG00000112062	MAPK14	0
chr6_18236452_18258405:-	circDEK	DEK	hsa-miR-33b-5p	ENSG00000112062	MAPK14	0
chr6_18236452_18258405:-	circDEK	DEK	hsa-miR-450b-5p	ENSG00000112062	MAPK14	0
chr6_98899268_98927822:-	circFBXL4	FBXL4	hsa-miR-21-5p	ENSG00000112333	NR2E1	0
chr6_98899268_98927822:-	circFBXL4	FBXL4	hsa-miR-590-5p	ENSG00000112333	NR2E1	0
chr10_14896846_14897517:+	circSUV39H2	SUV39H2	hsa-miR-376a-3p	ENSG00000112357	PEX7	0
chr10_14896846_14897517:+	circSUV39H2	SUV39H2	hsa-miR-376b-3p	ENSG00000112357	PEX7	0
chr18_56758865_56781656:+	circWDR7	WDR7	hsa-miR-128-3p	ENSG00000112379	ARFGEF3	0
chr18_56758865_56781656:+	circWDR7	WDR7	hsa-miR-135a-5p	ENSG00000112379	ARFGEF3	0
chr18_56758865_56781656:+	circWDR7	WDR7	hsa-miR-135b-5p	ENSG00000112379	ARFGEF3	0
chr18_56758865_56781656:+	circWDR7	WDR7	hsa-miR-153-3p	ENSG00000112379	ARFGEF3	0
chr18_56758865_56781656:+	circWDR7	WDR7	hsa-miR-345-5p	ENSG00000112379	ARFGEF3	0
chr10_50433476_50466932:-	circSGMS1	SGMS1	hsa-miR-337-3p	ENSG00000112562	SMOC2	0
chr12_1263034_1290012:+	circERC1-1	ERC1	hsa-miR-29b-3p	ENSG00000112763	BTN2A1	0
chr10_50433476_50466932:-	circSGMS1	SGMS1	hsa-miR-337-3p	ENSG00000112773	FAM46A	0
chr10_50433476_50466932:-	circSGMS1	SGMS1	hsa-miR-421	ENSG00000112773	FAM46A	0
chr10_50433476_50466932:-	circSGMS1	SGMS1	hsa-miR-543	ENSG00000112773	FAM46A	0
chr1_84179177_84197824:+	circPRKACB	PRKACB	hsa-miR-2681-5p	ENSG00000112837	TBX18	0
chr6_108854225_108876350:+	circARMC2	ARMC2	hsa-miR-143-3p	ENSG00000113013	HSPA9	0
chr12_1263034_1290012:+	circERC1-1	ERC1	hsa-miR-29a-3p	ENSG00000113300	CNOT6	0
chr12_1263034_1290012:+	circERC1-1	ERC1	hsa-miR-29b-3p	ENSG00000113300	CNOT6	0
chr12_1263034_1290012:+	circERC1-1	ERC1	hsa-miR-29c-3p	ENSG00000113300	CNOT6	0
chr18_56758865_56781656:+	circWDR7	WDR7	hsa-miR-148a-3p	ENSG00000113430	IRX4	0
chr18_56758865_56781656:+	circWDR7	WDR7	hsa-miR-148b-3p	ENSG00000113430	IRX4	0
chr18_56758865_56781656:+	circWDR7	WDR7	hsa-miR-152-3p	ENSG00000113430	IRX4	0
chr12_1263034_1290012:+	circERC1-1	ERC1	hsa-miR-133a-3p	ENSG00000114098	ARMC8	0
chr12_1263034_1290012:+	circERC1-1	ERC1	hsa-miR-133b	ENSG00000114098	ARMC8	0
chr12_1263034_1290012:+	circERC1-1	ERC1	hsa-miR-29a-3p	ENSG00000114098	ARMC8	0
chr12_1263034_1290012:+	circERC1-1	ERC1	hsa-miR-29b-3p	ENSG00000114098	ARMC8	0
chr12_1263034_1290012:+	circERC1-1	ERC1	hsa-miR-29c-3p	ENSG00000114098	ARMC8	0
chr6_108854225_108876350:+	circARMC2	ARMC2	hsa-miR-143-3p	ENSG00000114388	NPRL2	0
chr12_1263034_1290012:+	circERC1-1	ERC1	hsa-miR-133b	ENSG00000114491	UMPS	0
chr12_1263034_1290012:+	circERC1-1	ERC1	hsa-miR-29a-3p	ENSG00000114491	UMPS	0
chr12_1263034_1290012:+	circERC1-1	ERC1	hsa-miR-29b-3p	ENSG00000114491	UMPS	0
chr12_1263034_1290012:+	circERC1-1	ERC1	hsa-miR-29c-3p	ENSG00000114491	UMPS	0
chr10_14896846_14897517:+	circSUV39H2	SUV39H2	hsa-miR-380-3p	ENSG00000114520	SNX4	0
chr10_14896846_14897517:+	circSUV39H2	SUV39H2	hsa-miR-450b-5p	ENSG00000114520	SNX4	0
chr6_98899268_98927822:-	circFBXL4	FBXL4	hsa-miR-142-3p	ENSG00000114790	ARHGEF26	0
chr6_98899268_98927822:-	circFBXL4	FBXL4	hsa-miR-149-5p	ENSG00000114790	ARHGEF26	0
chr6_98899268_98927822:-	circFBXL4	FBXL4	hsa-miR-21-5p	ENSG00000114790	ARHGEF26	0
chr6_98899268_98927822:-	circFBXL4	FBXL4	hsa-miR-24-3p	ENSG00000114790	ARHGEF26	0
chr6_98899268_98927822:-	circFBXL4	FBXL4	hsa-miR-374a-5p	ENSG00000114790	ARHGEF26	0
chr6_98899268_98927822:-	circFBXL4	FBXL4	hsa-miR-374b-5p	ENSG00000114790	ARHGEF26	0
chr6_98899268_98927822:-	circFBXL4	FBXL4	hsa-miR-378a-3p	ENSG00000114790	ARHGEF26	0
chr6_98899268_98927822:-	circFBXL4	FBXL4	hsa-miR-590-5p	ENSG00000114790	ARHGEF26	0
chr21_29321221_29329693:+	circBACH1	BACH1	hsa-miR-142-5p	ENSG00000115165	CYTIP	0
chr6_98899268_98927822:-	circFBXL4	FBXL4	hsa-miR-105-5p	ENSG00000115221	ITGB6	0
chr6_108854225_108876350:+	circARMC2	ARMC2	hsa-miR-143-3p	ENSG00000115275	MOGS	0
chr12_1289852_1444750:+	circERC1-2	ERC1	hsa-miR-1301-3p	ENSG00000115306	SPTBN1	0
chr12_1289852_1444750:+	circERC1-2	ERC1	hsa-miR-138-5p	ENSG00000115306	SPTBN1	0
chr12_1289852_1444750:+	circERC1-2	ERC1	hsa-miR-150-5p	ENSG00000115306	SPTBN1	0
chr21_29321221_29329693:+	circBACH1	BACH1	hsa-miR-15a-5p	ENSG00000115307	AUP1	0
chr21_29321221_29329693:+	circBACH1	BACH1	hsa-miR-15b-5p	ENSG00000115307	AUP1	0
chr21_29321221_29329693:+	circBACH1	BACH1	hsa-miR-16-5p	ENSG00000115307	AUP1	0
chr21_29321221_29329693:+	circBACH1	BACH1	hsa-miR-182-5p	ENSG00000115307	AUP1	0
chr21_29321221_29329693:+	circBACH1	BACH1	hsa-miR-195-5p	ENSG00000115307	AUP1	0
chr21_29321221_29329693:+	circBACH1	BACH1	hsa-miR-424-5p	ENSG00000115307	AUP1	0
chr21_29321221_29329693:+	circBACH1	BACH1	hsa-miR-489-3p	ENSG00000115307	AUP1	0
chr21_29321221_29329693:+	circBACH1	BACH1	hsa-miR-497-5p	ENSG00000115307	AUP1	0
chr21_29321221_29329693:+	circBACH1	BACH1	hsa-miR-625-5p	ENSG00000115307	AUP1	0
chr6_98899268_98927822:-	circFBXL4	FBXL4	hsa-miR-127-3p	ENSG00000115507	OTX1	0
chr6_98899268_98927822:-	circFBXL4	FBXL4	hsa-miR-142-3p	ENSG00000115507	OTX1	0
chr6_98899268_98927822:-	circFBXL4	FBXL4	hsa-miR-24-3p	ENSG00000115507	OTX1	0
chr6_98899268_98927822:-	circFBXL4	FBXL4	hsa-miR-375	ENSG00000115507	OTX1	0
chr2_147896301_147899898:+	circACVR2A	ACVR2A	hsa-miR-509-3p	ENSG00000115977	AAK1	0
chr2_147896301_147899898:+	circACVR2A	ACVR2A	hsa-miR-486-5p	ENSG00000116141	MARK1	0
chr21_29321221_29329693:+	circBACH1	BACH1	hsa-miR-182-5p	ENSG00000116157	GPX7	0
chr21_29321221_29329693:+	circBACH1	BACH1	hsa-miR-223-3p	ENSG00000116157	GPX7	0
chr21_29321221_29329693:+	circBACH1	BACH1	hsa-miR-28-3p	ENSG00000116157	GPX7	0
chr21_29321221_29329693:+	circBACH1	BACH1	hsa-miR-33a-5p	ENSG00000116157	GPX7	0
chr21_29321221_29329693:+	circBACH1	BACH1	hsa-miR-33b-5p	ENSG00000116157	GPX7	0
chr21_29321221_29329693:+	circBACH1	BACH1	hsa-miR-409-3p	ENSG00000116157	GPX7	0
chr2_147896301_147899898:+	circACVR2A	ACVR2A	hsa-miR-486-5p	ENSG00000116199	FAM20B	0
chr6_98899268_98927822:-	circFBXL4	FBXL4	hsa-miR-153-3p	ENSG00000116833	NR5A2	0
chr6_98899268_98927822:-	circFBXL4	FBXL4	hsa-miR-182-5p	ENSG00000116833	NR5A2	0
chr6_98899268_98927822:-	circFBXL4	FBXL4	hsa-miR-21-5p	ENSG00000116833	NR5A2	0
chr6_98899268_98927822:-	circFBXL4	FBXL4	hsa-miR-33a-5p	ENSG00000116833	NR5A2	0
chr6_98899268_98927822:-	circFBXL4	FBXL4	hsa-miR-33b-5p	ENSG00000116833	NR5A2	0
chr6_98899268_98927822:-	circFBXL4	FBXL4	hsa-miR-374a-5p	ENSG00000116833	NR5A2	0
chr6_98899268_98927822:-	circFBXL4	FBXL4	hsa-miR-374b-5p	ENSG00000116833	NR5A2	0
chr6_98899268_98927822:-	circFBXL4	FBXL4	hsa-miR-450b-5p	ENSG00000116833	NR5A2	0
chr2_147896301_147899898:+	circACVR2A	ACVR2A	hsa-miR-486-5p	ENSG00000116833	NR5A2	0
chr6_98899268_98927822:-	circFBXL4	FBXL4	hsa-miR-499a-5p	ENSG00000116833	NR5A2	0
chr6_98899268_98927822:-	circFBXL4	FBXL4	hsa-miR-590-5p	ENSG00000116833	NR5A2	0
chr6_18236452_18258405:-	circDEK	DEK	hsa-miR-1271-5p	ENSG00000117020	AKT3	0
chr6_18236452_18258405:-	circDEK	DEK	hsa-miR-129-5p	ENSG00000117020	AKT3	0
chr6_18236452_18258405:-	circDEK	DEK	hsa-miR-450b-5p	ENSG00000117020	AKT3	0
chr10_50433476_50466932:-	circSGMS1	SGMS1	hsa-miR-452-5p	ENSG00000117036	ETV3	0
chr10_50433476_50466932:-	circSGMS1	SGMS1	hsa-miR-543	ENSG00000117036	ETV3	0
chr2_147896301_147899898:+	circACVR2A	ACVR2A	hsa-miR-486-5p	ENSG00000117139	KDM5B	0
chr6_108854225_108876350:+	circARMC2	ARMC2	hsa-miR-143-3p	ENSG00000117222	RBBP5	0
chr21_29321221_29329693:+	circBACH1	BACH1	hsa-miR-142-5p	ENSG00000117228	GBP1	0
chr21_29321221_29329693:+	circBACH1	BACH1	hsa-miR-182-5p	ENSG00000117228	GBP1	0
chr21_29321221_29329693:+	circBACH1	BACH1	hsa-miR-23a-3p	ENSG00000117228	GBP1	0
chr21_29321221_29329693:+	circBACH1	BACH1	hsa-miR-23b-3p	ENSG00000117228	GBP1	0
chr21_29321221_29329693:+	circBACH1	BACH1	hsa-miR-494-3p	ENSG00000117228	GBP1	0
chr12_1263034_1290012:+	circERC1-1	ERC1	hsa-miR-133a-3p	ENSG00000117461	PIK3R3	0
chr12_1263034_1290012:+	circERC1-1	ERC1	hsa-miR-133b	ENSG00000117461	PIK3R3	0
chr12_1263034_1290012:+	circERC1-1	ERC1	hsa-miR-29a-3p	ENSG00000117461	PIK3R3	0
chr12_1263034_1290012:+	circERC1-1	ERC1	hsa-miR-29b-3p	ENSG00000117461	PIK3R3	0
chr12_1263034_1290012:+	circERC1-1	ERC1	hsa-miR-29c-3p	ENSG00000117461	PIK3R3	0
chr6_108854225_108876350:+	circARMC2	ARMC2	hsa-miR-136-5p	ENSG00000117528	ABCD3	0
chr12_1263034_1290012:+	circERC1-1	ERC1	hsa-miR-133a-3p	ENSG00000117682	DHDDS	0
chr12_1263034_1290012:+	circERC1-1	ERC1	hsa-miR-133b	ENSG00000117682	DHDDS	0
chr12_1263034_1290012:+	circERC1-1	ERC1	hsa-miR-29a-3p	ENSG00000117682	DHDDS	0
chr12_1263034_1290012:+	circERC1-1	ERC1	hsa-miR-29b-3p	ENSG00000117682	DHDDS	0
chr12_1263034_1290012:+	circERC1-1	ERC1	hsa-miR-29c-3p	ENSG00000117682	DHDDS	0
chr12_1263034_1290012:+	circERC1-1	ERC1	hsa-miR-133a-3p	ENSG00000118242	MREG	0
chr12_1263034_1290012:+	circERC1-1	ERC1	hsa-miR-133b	ENSG00000118242	MREG	0
chr18_76849526_76881512:+	circZNF236	ZNF236	hsa-miR-204-5p	ENSG00000118242	MREG	0
chr18_76849526_76881512:+	circZNF236	ZNF236	hsa-miR-211-5p	ENSG00000118242	MREG	0
chr18_76849526_76881512:+	circZNF236	ZNF236	hsa-miR-22-3p	ENSG00000118242	MREG	0
chr3_183650296_183672484:+	circKLHL24	KLHL24	hsa-miR-376c-3p	ENSG00000118271	TTR	0
chr3_183650296_183672484:+	circKLHL24	KLHL24	hsa-miR-194-5p	ENSG00000118432	CNR1	0
chr3_183650296_183672484:+	circKLHL24	KLHL24	hsa-miR-543	ENSG00000118432	CNR1	0
chr10_50433476_50466932:-	circSGMS1	SGMS1	hsa-miR-421	ENSG00000118513	MYB	0
chr10_50433476_50466932:-	circSGMS1	SGMS1	hsa-miR-452-5p	ENSG00000118513	MYB	0
chr12_1289852_1444750:+	circERC1-2	ERC1	hsa-miR-150-5p	ENSG00000118518	RNF146	0
chr12_1263034_1290012:+	circERC1-1	ERC1	hsa-miR-133a-3p	ENSG00000118655	DCLRE1B	0
chr12_1263034_1290012:+	circERC1-1	ERC1	hsa-miR-133b	ENSG00000118655	DCLRE1B	0
chr6_98899268_98927822:-	circFBXL4	FBXL4	hsa-miR-105-5p	ENSG00000118777	ABCG2	0
chr6_98899268_98927822:-	circFBXL4	FBXL4	hsa-miR-142-3p	ENSG00000118777	ABCG2	0
chr6_98899268_98927822:-	circFBXL4	FBXL4	hsa-miR-374b-5p	ENSG00000118777	ABCG2	0
chr2_147896301_147899898:+	circACVR2A	ACVR2A	hsa-miR-486-5p	ENSG00000119231	SENP5	0
chr21_29321221_29329693:+	circBACH1	BACH1	hsa-miR-105-5p	ENSG00000119314	PTBP3	0
chr21_29321221_29329693:+	circBACH1	BACH1	hsa-miR-142-5p	ENSG00000119314	PTBP3	0
chr21_29321221_29329693:+	circBACH1	BACH1	hsa-miR-150-5p	ENSG00000119314	PTBP3	0
chr21_29321221_29329693:+	circBACH1	BACH1	hsa-miR-15a-5p	ENSG00000119314	PTBP3	0
chr21_29321221_29329693:+	circBACH1	BACH1	hsa-miR-15b-5p	ENSG00000119314	PTBP3	0
chr21_29321221_29329693:+	circBACH1	BACH1	hsa-miR-16-5p	ENSG00000119314	PTBP3	0
chr21_29321221_29329693:+	circBACH1	BACH1	hsa-miR-186-5p	ENSG00000119314	PTBP3	0
chr21_29321221_29329693:+	circBACH1	BACH1	hsa-miR-195-5p	ENSG00000119314	PTBP3	0
chr21_29321221_29329693:+	circBACH1	BACH1	hsa-miR-214-3p	ENSG00000119314	PTBP3	0
chr21_29321221_29329693:+	circBACH1	BACH1	hsa-miR-223-3p	ENSG00000119314	PTBP3	0
chr21_29321221_29329693:+	circBACH1	BACH1	hsa-miR-23a-3p	ENSG00000119314	PTBP3	0
chr21_29321221_29329693:+	circBACH1	BACH1	hsa-miR-23b-3p	ENSG00000119314	PTBP3	0
chr21_29321221_29329693:+	circBACH1	BACH1	hsa-miR-33a-5p	ENSG00000119314	PTBP3	0
chr21_29321221_29329693:+	circBACH1	BACH1	hsa-miR-33b-5p	ENSG00000119314	PTBP3	0
chr21_29321221_29329693:+	circBACH1	BACH1	hsa-miR-409-3p	ENSG00000119314	PTBP3	0
chr21_29321221_29329693:+	circBACH1	BACH1	hsa-miR-424-5p	ENSG00000119314	PTBP3	0
chr21_29321221_29329693:+	circBACH1	BACH1	hsa-miR-425-5p	ENSG00000119314	PTBP3	0
chr21_29321221_29329693:+	circBACH1	BACH1	hsa-miR-489-3p	ENSG00000119314	PTBP3	0
chr21_29321221_29329693:+	circBACH1	BACH1	hsa-miR-494-3p	ENSG00000119314	PTBP3	0
chr21_29321221_29329693:+	circBACH1	BACH1	hsa-miR-497-5p	ENSG00000119314	PTBP3	0
chr21_29321221_29329693:+	circBACH1	BACH1	hsa-miR-625-5p	ENSG00000119314	PTBP3	0
chr6_98899268_98927822:-	circFBXL4	FBXL4	hsa-miR-105-5p	ENSG00000119402	FBXW2	0
chr6_98899268_98927822:-	circFBXL4	FBXL4	hsa-miR-1307-3p	ENSG00000119402	FBXW2	0
chr6_98899268_98927822:-	circFBXL4	FBXL4	hsa-miR-149-5p	ENSG00000119402	FBXW2	0
chr6_98899268_98927822:-	circFBXL4	FBXL4	hsa-miR-182-5p	ENSG00000119402	FBXW2	0
chr6_98899268_98927822:-	circFBXL4	FBXL4	hsa-miR-185-5p	ENSG00000119402	FBXW2	0
chr6_98899268_98927822:-	circFBXL4	FBXL4	hsa-miR-24-3p	ENSG00000119402	FBXW2	0
chr6_98899268_98927822:-	circFBXL4	FBXL4	hsa-miR-374a-5p	ENSG00000119402	FBXW2	0
chr6_98899268_98927822:-	circFBXL4	FBXL4	hsa-miR-374b-5p	ENSG00000119402	FBXW2	0
chr6_98899268_98927822:-	circFBXL4	FBXL4	hsa-miR-375	ENSG00000119402	FBXW2	0
chr6_98899268_98927822:-	circFBXL4	FBXL4	hsa-miR-450b-5p	ENSG00000119402	FBXW2	0
chr2_147896301_147899898:+	circACVR2A	ACVR2A	hsa-miR-486-5p	ENSG00000119402	FBXW2	0
chr6_98899268_98927822:-	circFBXL4	FBXL4	hsa-miR-489-3p	ENSG00000119402	FBXW2	0
chr6_98899268_98927822:-	circFBXL4	FBXL4	hsa-miR-628-5p	ENSG00000119402	FBXW2	0
chr12_1289852_1444750:+	circERC1-2	ERC1	hsa-miR-1301-3p	ENSG00000119514	GALNT12	0
chr6_98899268_98927822:-	circFBXL4	FBXL4	hsa-miR-105-5p	ENSG00000119711	ALDH6A1	0
chr6_98899268_98927822:-	circFBXL4	FBXL4	hsa-miR-149-5p	ENSG00000119711	ALDH6A1	0
chr1_84179177_84197824:+	circPRKACB	PRKACB	hsa-miR-182-5p	ENSG00000119711	ALDH6A1	0
chr6_98899268_98927822:-	circFBXL4	FBXL4	hsa-miR-182-5p	ENSG00000119711	ALDH6A1	0
chr1_84179177_84197824:+	circPRKACB	PRKACB	hsa-miR-2681-5p	ENSG00000119711	ALDH6A1	0
chr1_84179177_84197824:+	circPRKACB	PRKACB	hsa-miR-3200-5p	ENSG00000119711	ALDH6A1	0
chr2_147896301_147899898:+	circACVR2A	ACVR2A	hsa-miR-486-5p	ENSG00000119866	BCL11A	0
chr6_98899268_98927822:-	circFBXL4	FBXL4	hsa-miR-105-5p	ENSG00000119927	GPAM	0
chr6_98899268_98927822:-	circFBXL4	FBXL4	hsa-miR-153-3p	ENSG00000119927	GPAM	0
chr6_98899268_98927822:-	circFBXL4	FBXL4	hsa-miR-182-5p	ENSG00000119927	GPAM	0
chr6_98899268_98927822:-	circFBXL4	FBXL4	hsa-miR-33a-5p	ENSG00000119927	GPAM	0
chr6_98899268_98927822:-	circFBXL4	FBXL4	hsa-miR-33b-5p	ENSG00000119927	GPAM	0
chr6_98899268_98927822:-	circFBXL4	FBXL4	hsa-miR-374a-5p	ENSG00000119927	GPAM	0
chr6_98899268_98927822:-	circFBXL4	FBXL4	hsa-miR-374b-5p	ENSG00000119927	GPAM	0
chr6_98899268_98927822:-	circFBXL4	FBXL4	hsa-miR-378a-3p	ENSG00000119927	GPAM	0
chr6_98899268_98927822:-	circFBXL4	FBXL4	hsa-miR-450b-5p	ENSG00000119927	GPAM	0
chr6_98899268_98927822:-	circFBXL4	FBXL4	hsa-miR-185-5p	ENSG00000119938	PPP1R3C	0
chr6_98899268_98927822:-	circFBXL4	FBXL4	hsa-miR-199b-3p	ENSG00000119938	PPP1R3C	0
chr6_98899268_98927822:-	circFBXL4	FBXL4	hsa-miR-33a-5p	ENSG00000119938	PPP1R3C	0
chr6_98899268_98927822:-	circFBXL4	FBXL4	hsa-miR-33b-5p	ENSG00000119938	PPP1R3C	0
chr6_98899268_98927822:-	circFBXL4	FBXL4	hsa-miR-374a-5p	ENSG00000119938	PPP1R3C	0
chr6_98899268_98927822:-	circFBXL4	FBXL4	hsa-miR-374b-5p	ENSG00000119938	PPP1R3C	0
chr6_98899268_98927822:-	circFBXL4	FBXL4	hsa-miR-489-3p	ENSG00000119938	PPP1R3C	0
chr12_1263034_1290012:+	circERC1-1	ERC1	hsa-miR-133a-3p	ENSG00000119969	HELLS	0
chr12_1263034_1290012:+	circERC1-1	ERC1	hsa-miR-133b	ENSG00000119969	HELLS	0
chr18_56758865_56781656:+	circWDR7	WDR7	hsa-miR-128-3p	ENSG00000120068	HOXB8	0
chr6_98899268_98927822:-	circFBXL4	FBXL4	hsa-miR-185-5p	ENSG00000120068	HOXB8	0
chr6_98899268_98927822:-	circFBXL4	FBXL4	hsa-miR-24-3p	ENSG00000120068	HOXB8	0
chr6_98899268_98927822:-	circFBXL4	FBXL4	hsa-miR-499a-5p	ENSG00000120068	HOXB8	0
chr6_98899268_98927822:-	circFBXL4	FBXL4	hsa-miR-185-5p	ENSG00000120093	HOXB3	0
chr6_98899268_98927822:-	circFBXL4	FBXL4	hsa-miR-374a-5p	ENSG00000120093	HOXB3	0
chr6_98899268_98927822:-	circFBXL4	FBXL4	hsa-miR-374b-5p	ENSG00000120093	HOXB3	0
chr6_98899268_98927822:-	circFBXL4	FBXL4	hsa-miR-375	ENSG00000120093	HOXB3	0
chr6_98899268_98927822:-	circFBXL4	FBXL4	hsa-miR-378a-3p	ENSG00000120093	HOXB3	0
chr12_1263034_1290012:+	circERC1-1	ERC1	hsa-miR-133a-3p	ENSG00000120149	MSX2	0
chr12_1263034_1290012:+	circERC1-1	ERC1	hsa-miR-133b	ENSG00000120149	MSX2	0
chr12_1263034_1290012:+	circERC1-1	ERC1	hsa-miR-29a-3p	ENSG00000120254	MTHFD1L	0
chr12_1263034_1290012:+	circERC1-1	ERC1	hsa-miR-29b-3p	ENSG00000120254	MTHFD1L	0
chr12_1263034_1290012:+	circERC1-1	ERC1	hsa-miR-29c-3p	ENSG00000120254	MTHFD1L	0
chr6_108854225_108876350:+	circARMC2	ARMC2	hsa-miR-136-5p	ENSG00000120526	NUDCD1	0
chr6_98899268_98927822:-	circFBXL4	FBXL4	hsa-miR-149-5p	ENSG00000120659	TNFSF11	0
chr10_14896846_14897517:+	circSUV39H2	SUV39H2	hsa-miR-1286	ENSG00000120688	WBP4	0
chr10_14896846_14897517:+	circSUV39H2	SUV39H2	hsa-miR-200b-3p	ENSG00000120688	WBP4	0
chr10_14896846_14897517:+	circSUV39H2	SUV39H2	hsa-miR-429	ENSG00000120688	WBP4	0
chr10_14896846_14897517:+	circSUV39H2	SUV39H2	hsa-miR-577	ENSG00000120688	WBP4	0
chr6_98899268_98927822:-	circFBXL4	FBXL4	hsa-miR-182-5p	ENSG00000120896	SORBS3	0
chr6_98899268_98927822:-	circFBXL4	FBXL4	hsa-miR-185-5p	ENSG00000120896	SORBS3	0
chr18_76849526_76881512:+	circZNF236	ZNF236	hsa-miR-124-3p	ENSG00000121310	ECHDC2	0
chr12_1289852_1444750:+	circERC1-2	ERC1	hsa-miR-150-5p	ENSG00000121310	ECHDC2	0
chr12_1263034_1290012:+	circERC1-1	ERC1	hsa-miR-29a-3p	ENSG00000121310	ECHDC2	0
chr12_1263034_1290012:+	circERC1-1	ERC1	hsa-miR-29b-3p	ENSG00000121310	ECHDC2	0
chr12_1263034_1290012:+	circERC1-1	ERC1	hsa-miR-29c-3p	ENSG00000121310	ECHDC2	0
chr18_76849526_76881512:+	circZNF236	ZNF236	hsa-miR-411-5p	ENSG00000121310	ECHDC2	0
chr6_98899268_98927822:-	circFBXL4	FBXL4	hsa-miR-33a-5p	ENSG00000121570	DPPA4	0
chr6_98899268_98927822:-	circFBXL4	FBXL4	hsa-miR-33b-5p	ENSG00000121570	DPPA4	0
chr12_1263034_1290012:+	circERC1-1	ERC1	hsa-miR-133a-3p	ENSG00000121644	DESI2	0
chr12_1263034_1290012:+	circERC1-1	ERC1	hsa-miR-133b	ENSG00000121644	DESI2	0
chr6_108854225_108876350:+	circARMC2	ARMC2	hsa-miR-143-3p	ENSG00000121671	CRY2	0
chr10_14896846_14897517:+	circSUV39H2	SUV39H2	hsa-miR-144-3p	ENSG00000121766	ZCCHC17	0
chr10_14896846_14897517:+	circSUV39H2	SUV39H2	hsa-miR-214-3p	ENSG00000121766	ZCCHC17	0
chr6_98899268_98927822:-	circFBXL4	FBXL4	hsa-miR-105-5p	ENSG00000122376	FAM35A	0
chr6_98899268_98927822:-	circFBXL4	FBXL4	hsa-miR-33a-5p	ENSG00000122376	FAM35A	0
chr6_98899268_98927822:-	circFBXL4	FBXL4	hsa-miR-33b-5p	ENSG00000122376	FAM35A	0
chr6_98899268_98927822:-	circFBXL4	FBXL4	hsa-miR-374a-5p	ENSG00000122376	FAM35A	0
chr6_98899268_98927822:-	circFBXL4	FBXL4	hsa-miR-374b-5p	ENSG00000122376	FAM35A	0
chr18_56758865_56781656:+	circWDR7	WDR7	hsa-miR-153-3p	ENSG00000122417	ODF2L	0
chr10_14896846_14897517:+	circSUV39H2	SUV39H2	hsa-miR-1286	ENSG00000122644	ARL4A	0
chr10_14896846_14897517:+	circSUV39H2	SUV39H2	hsa-miR-200b-3p	ENSG00000122644	ARL4A	0
chr10_14896846_14897517:+	circSUV39H2	SUV39H2	hsa-miR-214-3p	ENSG00000122644	ARL4A	0
chr10_14896846_14897517:+	circSUV39H2	SUV39H2	hsa-miR-380-3p	ENSG00000122644	ARL4A	0
chr10_14896846_14897517:+	circSUV39H2	SUV39H2	hsa-miR-421	ENSG00000122644	ARL4A	0
chr10_14896846_14897517:+	circSUV39H2	SUV39H2	hsa-miR-429	ENSG00000122644	ARL4A	0
chr10_14896846_14897517:+	circSUV39H2	SUV39H2	hsa-miR-450b-5p	ENSG00000122644	ARL4A	0
chr10_14896846_14897517:+	circSUV39H2	SUV39H2	hsa-miR-577	ENSG00000122644	ARL4A	0
chr2_147896301_147899898:+	circACVR2A	ACVR2A	hsa-miR-486-5p	ENSG00000122741	DCAF10	1
chr6_98899268_98927822:-	circFBXL4	FBXL4	hsa-miR-182-5p	ENSG00000122787	AKR1D1	0
chr12_1289852_1444750:+	circERC1-2	ERC1	hsa-miR-1301-3p	ENSG00000123552	USP45	0
chr12_1263034_1290012:+	circERC1-1	ERC1	hsa-miR-29a-3p	ENSG00000123643	SLC36A1	0
chr12_1263034_1290012:+	circERC1-1	ERC1	hsa-miR-29b-3p	ENSG00000123643	SLC36A1	0
chr12_1263034_1290012:+	circERC1-1	ERC1	hsa-miR-29c-3p	ENSG00000123643	SLC36A1	0
chr12_1263034_1290012:+	circERC1-1	ERC1	hsa-miR-29a-3p	ENSG00000124459	ZNF45	0
chr12_1263034_1290012:+	circERC1-1	ERC1	hsa-miR-29b-3p	ENSG00000124459	ZNF45	0
chr12_1263034_1290012:+	circERC1-1	ERC1	hsa-miR-29c-3p	ENSG00000124459	ZNF45	0
chr18_56758865_56781656:+	circWDR7	WDR7	hsa-miR-103a-3p	ENSG00000124466	LYPD3	0
chr18_56758865_56781656:+	circWDR7	WDR7	hsa-miR-107	ENSG00000124466	LYPD3	0
chr18_56758865_56781656:+	circWDR7	WDR7	hsa-miR-128-3p	ENSG00000124466	LYPD3	0
chr18_56758865_56781656:+	circWDR7	WDR7	hsa-miR-148a-3p	ENSG00000124466	LYPD3	0
chr18_56758865_56781656:+	circWDR7	WDR7	hsa-miR-148b-3p	ENSG00000124466	LYPD3	0
chr18_56758865_56781656:+	circWDR7	WDR7	hsa-miR-152-3p	ENSG00000124466	LYPD3	0
chr21_29321221_29329693:+	circBACH1	BACH1	hsa-miR-103a-3p	ENSG00000124783	SSR1	0
chr21_29321221_29329693:+	circBACH1	BACH1	hsa-miR-105-5p	ENSG00000124783	SSR1	0
chr21_29321221_29329693:+	circBACH1	BACH1	hsa-miR-107	ENSG00000124783	SSR1	0
chr21_29321221_29329693:+	circBACH1	BACH1	hsa-miR-141-3p	ENSG00000124783	SSR1	0
chr21_29321221_29329693:+	circBACH1	BACH1	hsa-miR-150-5p	ENSG00000124783	SSR1	0
chr21_29321221_29329693:+	circBACH1	BACH1	hsa-miR-15a-5p	ENSG00000124783	SSR1	0
chr21_29321221_29329693:+	circBACH1	BACH1	hsa-miR-15b-5p	ENSG00000124783	SSR1	0
chr21_29321221_29329693:+	circBACH1	BACH1	hsa-miR-16-5p	ENSG00000124783	SSR1	0
chr21_29321221_29329693:+	circBACH1	BACH1	hsa-miR-186-5p	ENSG00000124783	SSR1	0
chr21_29321221_29329693:+	circBACH1	BACH1	hsa-miR-195-5p	ENSG00000124783	SSR1	0
chr21_29321221_29329693:+	circBACH1	BACH1	hsa-miR-200a-3p	ENSG00000124783	SSR1	0
chr21_29321221_29329693:+	circBACH1	BACH1	hsa-miR-214-3p	ENSG00000124783	SSR1	0
chr21_29321221_29329693:+	circBACH1	BACH1	hsa-miR-219a-2-3p	ENSG00000124783	SSR1	0
chr21_29321221_29329693:+	circBACH1	BACH1	hsa-miR-23a-3p	ENSG00000124783	SSR1	0
chr21_29321221_29329693:+	circBACH1	BACH1	hsa-miR-23b-3p	ENSG00000124783	SSR1	0
chr21_29321221_29329693:+	circBACH1	BACH1	hsa-miR-28-3p	ENSG00000124783	SSR1	0
chr21_29321221_29329693:+	circBACH1	BACH1	hsa-miR-33a-5p	ENSG00000124783	SSR1	0
chr21_29321221_29329693:+	circBACH1	BACH1	hsa-miR-33b-5p	ENSG00000124783	SSR1	0
chr21_29321221_29329693:+	circBACH1	BACH1	hsa-miR-409-3p	ENSG00000124783	SSR1	0
chr21_29321221_29329693:+	circBACH1	BACH1	hsa-miR-424-5p	ENSG00000124783	SSR1	0
chr21_29321221_29329693:+	circBACH1	BACH1	hsa-miR-425-5p	ENSG00000124783	SSR1	0
chr21_29321221_29329693:+	circBACH1	BACH1	hsa-miR-489-3p	ENSG00000124783	SSR1	0
chr21_29321221_29329693:+	circBACH1	BACH1	hsa-miR-494-3p	ENSG00000124783	SSR1	0
chr21_29321221_29329693:+	circBACH1	BACH1	hsa-miR-497-5p	ENSG00000124783	SSR1	0
chr21_29321221_29329693:+	circBACH1	BACH1	hsa-miR-625-5p	ENSG00000124783	SSR1	0
chr12_1263034_1290012:+	circERC1-1	ERC1	hsa-miR-133a-3p	ENSG00000124795	DEK	0
chr12_1263034_1290012:+	circERC1-1	ERC1	hsa-miR-133b	ENSG00000124795	DEK	0
chr6_98899268_98927822:-	circFBXL4	FBXL4	hsa-miR-105-5p	ENSG00000125285	SOX21	0
chr6_98899268_98927822:-	circFBXL4	FBXL4	hsa-miR-185-5p	ENSG00000125285	SOX21	0
chr6_98899268_98927822:-	circFBXL4	FBXL4	hsa-miR-450b-5p	ENSG00000125285	SOX21	0
chr6_98899268_98927822:-	circFBXL4	FBXL4	hsa-miR-105-5p	ENSG00000125398	SOX9	0
chr6_98899268_98927822:-	circFBXL4	FBXL4	hsa-miR-1307-3p	ENSG00000125398	SOX9	0
chr6_98899268_98927822:-	circFBXL4	FBXL4	hsa-miR-185-5p	ENSG00000125398	SOX9	0
chr6_98899268_98927822:-	circFBXL4	FBXL4	hsa-miR-21-5p	ENSG00000125398	SOX9	0
chr6_98899268_98927822:-	circFBXL4	FBXL4	hsa-miR-24-3p	ENSG00000125398	SOX9	0
chr6_98899268_98927822:-	circFBXL4	FBXL4	hsa-miR-33a-5p	ENSG00000125398	SOX9	0
chr6_98899268_98927822:-	circFBXL4	FBXL4	hsa-miR-33b-5p	ENSG00000125398	SOX9	0
chr1_77801331_77815231:+	circMIGA1	MIGA1	hsa-miR-432-5p	ENSG00000125398	SOX9	0
chr6_98899268_98927822:-	circFBXL4	FBXL4	hsa-miR-450b-5p	ENSG00000125398	SOX9	0
chr6_98899268_98927822:-	circFBXL4	FBXL4	hsa-miR-590-5p	ENSG00000125398	SOX9	0
chr6_18236452_18258405:-	circDEK	DEK	hsa-miR-193a-3p	ENSG00000126012	KDM5C	0
chr6_18236452_18258405:-	circDEK	DEK	hsa-miR-193b-3p	ENSG00000126012	KDM5C	0
chr6_18236452_18258405:-	circDEK	DEK	hsa-miR-450b-5p	ENSG00000126012	KDM5C	0
chr6_98899268_98927822:-	circFBXL4	FBXL4	hsa-miR-105-5p	ENSG00000126016	AMOT	0
chr6_98899268_98927822:-	circFBXL4	FBXL4	hsa-miR-182-5p	ENSG00000126016	AMOT	0
chr6_98899268_98927822:-	circFBXL4	FBXL4	hsa-miR-185-5p	ENSG00000126016	AMOT	0
chr6_98899268_98927822:-	circFBXL4	FBXL4	hsa-miR-24-3p	ENSG00000126016	AMOT	0
chr6_98899268_98927822:-	circFBXL4	FBXL4	hsa-miR-375	ENSG00000126016	AMOT	0
chr6_98899268_98927822:-	circFBXL4	FBXL4	hsa-miR-378a-3p	ENSG00000126016	AMOT	0
chr6_98899268_98927822:-	circFBXL4	FBXL4	hsa-miR-378d	ENSG00000126016	AMOT	0
chr6_98899268_98927822:-	circFBXL4	FBXL4	hsa-miR-3909	ENSG00000126016	AMOT	0
chr6_98899268_98927822:-	circFBXL4	FBXL4	hsa-miR-450b-5p	ENSG00000126016	AMOT	0
chr6_98899268_98927822:-	circFBXL4	FBXL4	hsa-miR-499a-5p	ENSG00000126016	AMOT	0
chr6_98899268_98927822:-	circFBXL4	FBXL4	hsa-miR-628-5p	ENSG00000126016	AMOT	0
chr6_130955105_130956499:-	circEPB41L2	EPB41L2	hsa-miR-199b-3p	ENSG00000126698	DNAJC8	0
chr21_29321221_29329693:+	circBACH1	BACH1	hsa-miR-105-5p	ENSG00000126773	PCNX4	0
chr21_29321221_29329693:+	circBACH1	BACH1	hsa-miR-141-3p	ENSG00000126773	PCNX4	0
chr21_29321221_29329693:+	circBACH1	BACH1	hsa-miR-142-5p	ENSG00000126773	PCNX4	0
chr21_29321221_29329693:+	circBACH1	BACH1	hsa-miR-182-5p	ENSG00000126773	PCNX4	0
chr21_29321221_29329693:+	circBACH1	BACH1	hsa-miR-186-5p	ENSG00000126773	PCNX4	0
chr21_29321221_29329693:+	circBACH1	BACH1	hsa-miR-200a-3p	ENSG00000126773	PCNX4	0
chr21_29321221_29329693:+	circBACH1	BACH1	hsa-miR-214-3p	ENSG00000126773	PCNX4	0
chr21_29321221_29329693:+	circBACH1	BACH1	hsa-miR-219a-2-3p	ENSG00000126773	PCNX4	0
chr21_29321221_29329693:+	circBACH1	BACH1	hsa-miR-23a-3p	ENSG00000126773	PCNX4	0
chr21_29321221_29329693:+	circBACH1	BACH1	hsa-miR-23b-3p	ENSG00000126773	PCNX4	0
chr21_29321221_29329693:+	circBACH1	BACH1	hsa-miR-4677-3p	ENSG00000126773	PCNX4	0
chr21_29321221_29329693:+	circBACH1	BACH1	hsa-miR-494-3p	ENSG00000126773	PCNX4	0
chr6_98899268_98927822:-	circFBXL4	FBXL4	hsa-miR-374a-5p	ENSG00000126785	RHOJ	0
chr6_98899268_98927822:-	circFBXL4	FBXL4	hsa-miR-374b-5p	ENSG00000126785	RHOJ	0
chr6_98899268_98927822:-	circFBXL4	FBXL4	hsa-miR-105-5p	ENSG00000126878	AIF1L	0
chr6_98899268_98927822:-	circFBXL4	FBXL4	hsa-miR-142-3p	ENSG00000126878	AIF1L	0
chr6_98899268_98927822:-	circFBXL4	FBXL4	hsa-miR-182-5p	ENSG00000126878	AIF1L	0
chr6_98899268_98927822:-	circFBXL4	FBXL4	hsa-miR-185-5p	ENSG00000126878	AIF1L	0
chr6_98899268_98927822:-	circFBXL4	FBXL4	hsa-miR-199b-3p	ENSG00000126878	AIF1L	0
chr6_98899268_98927822:-	circFBXL4	FBXL4	hsa-miR-21-5p	ENSG00000126878	AIF1L	0
chr6_98899268_98927822:-	circFBXL4	FBXL4	hsa-miR-24-3p	ENSG00000126878	AIF1L	0
chr6_98899268_98927822:-	circFBXL4	FBXL4	hsa-miR-33a-5p	ENSG00000126878	AIF1L	0
chr6_98899268_98927822:-	circFBXL4	FBXL4	hsa-miR-33b-5p	ENSG00000126878	AIF1L	0
chr6_98899268_98927822:-	circFBXL4	FBXL4	hsa-miR-374a-5p	ENSG00000126878	AIF1L	0
chr6_98899268_98927822:-	circFBXL4	FBXL4	hsa-miR-374b-5p	ENSG00000126878	AIF1L	0
chr6_98899268_98927822:-	circFBXL4	FBXL4	hsa-miR-3909	ENSG00000126878	AIF1L	0
chr6_98899268_98927822:-	circFBXL4	FBXL4	hsa-miR-489-3p	ENSG00000126878	AIF1L	0
chr6_98899268_98927822:-	circFBXL4	FBXL4	hsa-miR-590-5p	ENSG00000126878	AIF1L	0
chr6_98899268_98927822:-	circFBXL4	FBXL4	hsa-miR-628-5p	ENSG00000126878	AIF1L	0
chr1_84179177_84197824:+	circPRKACB	PRKACB	hsa-miR-153-3p	ENSG00000127418	FGFRL1	0
chr6_98899268_98927822:-	circFBXL4	FBXL4	hsa-miR-153-3p	ENSG00000127418	FGFRL1	0
chr6_98899268_98927822:-	circFBXL4	FBXL4	hsa-miR-185-5p	ENSG00000127418	FGFRL1	0
chr6_98899268_98927822:-	circFBXL4	FBXL4	hsa-miR-21-5p	ENSG00000127418	FGFRL1	0
chr6_98899268_98927822:-	circFBXL4	FBXL4	hsa-miR-33a-5p	ENSG00000127418	FGFRL1	0
chr6_98899268_98927822:-	circFBXL4	FBXL4	hsa-miR-33b-5p	ENSG00000127418	FGFRL1	0
chr1_84179177_84197824:+	circPRKACB	PRKACB	hsa-miR-361-3p	ENSG00000127418	FGFRL1	0
chr6_98899268_98927822:-	circFBXL4	FBXL4	hsa-miR-378a-3p	ENSG00000127418	FGFRL1	0
chr6_98899268_98927822:-	circFBXL4	FBXL4	hsa-miR-590-5p	ENSG00000127418	FGFRL1	0
chr21_29321221_29329693:+	circBACH1	BACH1	hsa-miR-105-5p	ENSG00000127863	TNFRSF19	0
chr21_29321221_29329693:+	circBACH1	BACH1	hsa-miR-15a-5p	ENSG00000127863	TNFRSF19	0
chr21_29321221_29329693:+	circBACH1	BACH1	hsa-miR-15b-5p	ENSG00000127863	TNFRSF19	0
chr21_29321221_29329693:+	circBACH1	BACH1	hsa-miR-16-5p	ENSG00000127863	TNFRSF19	0
chr21_29321221_29329693:+	circBACH1	BACH1	hsa-miR-186-5p	ENSG00000127863	TNFRSF19	0
chr21_29321221_29329693:+	circBACH1	BACH1	hsa-miR-195-5p	ENSG00000127863	TNFRSF19	0
chr21_29321221_29329693:+	circBACH1	BACH1	hsa-miR-223-3p	ENSG00000127863	TNFRSF19	0
chr21_29321221_29329693:+	circBACH1	BACH1	hsa-miR-33a-5p	ENSG00000127863	TNFRSF19	0
chr21_29321221_29329693:+	circBACH1	BACH1	hsa-miR-33b-5p	ENSG00000127863	TNFRSF19	0
chr21_29321221_29329693:+	circBACH1	BACH1	hsa-miR-409-3p	ENSG00000127863	TNFRSF19	0
chr21_29321221_29329693:+	circBACH1	BACH1	hsa-miR-424-5p	ENSG00000127863	TNFRSF19	0
chr21_29321221_29329693:+	circBACH1	BACH1	hsa-miR-489-3p	ENSG00000127863	TNFRSF19	0
chr21_29321221_29329693:+	circBACH1	BACH1	hsa-miR-497-5p	ENSG00000127863	TNFRSF19	0
chr12_1263034_1290012:+	circERC1-1	ERC1	hsa-miR-133a-3p	ENSG00000127914	AKAP9	0
chr12_1263034_1290012:+	circERC1-1	ERC1	hsa-miR-133b	ENSG00000127914	AKAP9	0
chr6_98899268_98927822:-	circFBXL4	FBXL4	hsa-miR-153-3p	ENSG00000127920	GNG11	0
chr1_77801331_77815231:+	circMIGA1	MIGA1	hsa-miR-26a-5p	ENSG00000127920	GNG11	0
chr1_77801331_77815231:+	circMIGA1	MIGA1	hsa-miR-26b-5p	ENSG00000127920	GNG11	0
chr6_98899268_98927822:-	circFBXL4	FBXL4	hsa-miR-584-5p	ENSG00000127920	GNG11	0
chr6_108854225_108876350:+	circARMC2	ARMC2	hsa-miR-136-5p	ENSG00000128059	PPAT	0
chr6_108854225_108876350:+	circARMC2	ARMC2	hsa-miR-143-3p	ENSG00000128059	PPAT	0
chr10_50433476_50466932:-	circSGMS1	SGMS1	hsa-miR-421	ENSG00000128165	ADM2	0
chr6_98899268_98927822:-	circFBXL4	FBXL4	hsa-miR-149-5p	ENSG00000128602	SMO	0
chr6_98899268_98927822:-	circFBXL4	FBXL4	hsa-miR-185-5p	ENSG00000128602	SMO	0
chr6_98899268_98927822:-	circFBXL4	FBXL4	hsa-miR-185-5p	ENSG00000128709	HOXD9	0
chr6_98899268_98927822:-	circFBXL4	FBXL4	hsa-miR-33a-5p	ENSG00000128710	HOXD10	0
chr6_98899268_98927822:-	circFBXL4	FBXL4	hsa-miR-33b-5p	ENSG00000128710	HOXD10	0
chr6_98899268_98927822:-	circFBXL4	FBXL4	hsa-miR-499a-5p	ENSG00000128710	HOXD10	0
chr6_98899268_98927822:-	circFBXL4	FBXL4	hsa-miR-1307-3p	ENSG00000128713	HOXD11	0
chr6_98899268_98927822:-	circFBXL4	FBXL4	hsa-miR-185-5p	ENSG00000128713	HOXD11	0
chr6_98899268_98927822:-	circFBXL4	FBXL4	hsa-miR-33a-5p	ENSG00000128713	HOXD11	0
chr6_98899268_98927822:-	circFBXL4	FBXL4	hsa-miR-33b-5p	ENSG00000128713	HOXD11	0
chr6_98899268_98927822:-	circFBXL4	FBXL4	hsa-miR-182-5p	ENSG00000128849	CGNL1	0
chr6_98899268_98927822:-	circFBXL4	FBXL4	hsa-miR-33a-5p	ENSG00000128849	CGNL1	0
chr6_98899268_98927822:-	circFBXL4	FBXL4	hsa-miR-33b-5p	ENSG00000128849	CGNL1	0
chr6_98899268_98927822:-	circFBXL4	FBXL4	hsa-miR-378a-3p	ENSG00000128849	CGNL1	0
chr6_98899268_98927822:-	circFBXL4	FBXL4	hsa-miR-450b-5p	ENSG00000128849	CGNL1	0
chr6_98899268_98927822:-	circFBXL4	FBXL4	hsa-miR-628-5p	ENSG00000128849	CGNL1	0
chr6_98899268_98927822:-	circFBXL4	FBXL4	hsa-miR-199b-3p	ENSG00000129244	ATP1B2	0
chr6_98899268_98927822:-	circFBXL4	FBXL4	hsa-miR-374a-5p	ENSG00000129244	ATP1B2	0
chr6_98899268_98927822:-	circFBXL4	FBXL4	hsa-miR-374b-5p	ENSG00000129244	ATP1B2	0
chr21_29321221_29329693:+	circBACH1	BACH1	hsa-miR-103a-3p	ENSG00000129467	ADCY4	0
chr21_29321221_29329693:+	circBACH1	BACH1	hsa-miR-107	ENSG00000129467	ADCY4	0
chr21_29321221_29329693:+	circBACH1	BACH1	hsa-miR-15a-5p	ENSG00000129467	ADCY4	0
chr21_29321221_29329693:+	circBACH1	BACH1	hsa-miR-15b-5p	ENSG00000129467	ADCY4	0
chr21_29321221_29329693:+	circBACH1	BACH1	hsa-miR-16-5p	ENSG00000129467	ADCY4	0
chr21_29321221_29329693:+	circBACH1	BACH1	hsa-miR-195-5p	ENSG00000129467	ADCY4	0
chr21_29321221_29329693:+	circBACH1	BACH1	hsa-miR-214-3p	ENSG00000129467	ADCY4	0
chr21_29321221_29329693:+	circBACH1	BACH1	hsa-miR-424-5p	ENSG00000129467	ADCY4	0
chr21_29321221_29329693:+	circBACH1	BACH1	hsa-miR-497-5p	ENSG00000129467	ADCY4	0
chr18_56758865_56781656:+	circWDR7	WDR7	hsa-miR-135a-5p	ENSG00000130021	PUDP	0
chr18_56758865_56781656:+	circWDR7	WDR7	hsa-miR-135b-5p	ENSG00000130021	PUDP	0
chr18_56758865_56781656:+	circWDR7	WDR7	hsa-miR-148a-3p	ENSG00000130021	PUDP	0
chr18_56758865_56781656:+	circWDR7	WDR7	hsa-miR-148b-3p	ENSG00000130021	PUDP	0
chr18_56758865_56781656:+	circWDR7	WDR7	hsa-miR-152-3p	ENSG00000130021	PUDP	0
chr18_56758865_56781656:+	circWDR7	WDR7	hsa-miR-153-3p	ENSG00000130021	PUDP	0
chr21_29321221_29329693:+	circBACH1	BACH1	hsa-miR-142-5p	ENSG00000130066	SAT1	0
chr21_29321221_29329693:+	circBACH1	BACH1	hsa-miR-15a-5p	ENSG00000130066	SAT1	0
chr21_29321221_29329693:+	circBACH1	BACH1	hsa-miR-15b-5p	ENSG00000130066	SAT1	0
chr21_29321221_29329693:+	circBACH1	BACH1	hsa-miR-16-5p	ENSG00000130066	SAT1	0
chr21_29321221_29329693:+	circBACH1	BACH1	hsa-miR-186-5p	ENSG00000130066	SAT1	0
chr21_29321221_29329693:+	circBACH1	BACH1	hsa-miR-195-5p	ENSG00000130066	SAT1	0
chr21_29321221_29329693:+	circBACH1	BACH1	hsa-miR-424-5p	ENSG00000130066	SAT1	0
chr21_29321221_29329693:+	circBACH1	BACH1	hsa-miR-425-5p	ENSG00000130066	SAT1	0
chr21_29321221_29329693:+	circBACH1	BACH1	hsa-miR-497-5p	ENSG00000130066	SAT1	0
chr6_108854225_108876350:+	circARMC2	ARMC2	hsa-miR-143-3p	ENSG00000130165	ELOF1	0
chr6_98899268_98927822:-	circFBXL4	FBXL4	hsa-miR-1307-3p	ENSG00000130304	SLC27A1	0
chr6_98899268_98927822:-	circFBXL4	FBXL4	hsa-miR-149-5p	ENSG00000130304	SLC27A1	0
chr6_98899268_98927822:-	circFBXL4	FBXL4	hsa-miR-185-5p	ENSG00000130304	SLC27A1	0
chr6_98899268_98927822:-	circFBXL4	FBXL4	hsa-miR-199b-3p	ENSG00000130304	SLC27A1	0
chr6_98899268_98927822:-	circFBXL4	FBXL4	hsa-miR-378a-3p	ENSG00000130304	SLC27A1	0
chr6_98899268_98927822:-	circFBXL4	FBXL4	hsa-miR-489-3p	ENSG00000130304	SLC27A1	0
chr12_1263034_1290012:+	circERC1-1	ERC1	hsa-miR-29a-3p	ENSG00000130584	ZBTB46	0
chr12_1263034_1290012:+	circERC1-1	ERC1	hsa-miR-29b-3p	ENSG00000130584	ZBTB46	0
chr12_1263034_1290012:+	circERC1-1	ERC1	hsa-miR-29c-3p	ENSG00000130584	ZBTB46	0
chr12_1289852_1444750:+	circERC1-2	ERC1	hsa-miR-150-5p	ENSG00000130703	OSBPL2	0
chr12_1263034_1290012:+	circERC1-1	ERC1	hsa-miR-133a-3p	ENSG00000130779	CLIP1	0
chr12_1263034_1290012:+	circERC1-1	ERC1	hsa-miR-133b	ENSG00000130779	CLIP1	0
chr12_1263034_1290012:+	circERC1-1	ERC1	hsa-miR-133a-3p	ENSG00000131016	AKAP12	0
chr12_1263034_1290012:+	circERC1-1	ERC1	hsa-miR-133b	ENSG00000131016	AKAP12	0
chr2_147896301_147899898:+	circACVR2A	ACVR2A	hsa-miR-509-3p	ENSG00000131037	EPS8L1	0
chr6_98899268_98927822:-	circFBXL4	FBXL4	hsa-miR-149-5p	ENSG00000131477	RAMP2	0
chr2_147896301_147899898:+	circACVR2A	ACVR2A	hsa-miR-486-5p	ENSG00000131482	G6PC	0
chr10_50433476_50466932:-	circSGMS1	SGMS1	hsa-miR-543	ENSG00000132002	DNAJB1	0
chr21_29321221_29329693:+	circBACH1	BACH1	hsa-miR-223-3p	ENSG00000132256	TRIM5	0
chr21_29321221_29329693:+	circBACH1	BACH1	hsa-miR-23a-3p	ENSG00000132256	TRIM5	0
chr21_29321221_29329693:+	circBACH1	BACH1	hsa-miR-23b-3p	ENSG00000132256	TRIM5	0
chr21_29321221_29329693:+	circBACH1	BACH1	hsa-miR-374b-3p	ENSG00000132256	TRIM5	0
chr21_29321221_29329693:+	circBACH1	BACH1	hsa-miR-409-3p	ENSG00000132256	TRIM5	0
chr21_29321221_29329693:+	circBACH1	BACH1	hsa-miR-425-5p	ENSG00000132256	TRIM5	0
chr18_76849526_76881512:+	circZNF236	ZNF236	hsa-miR-299-3p	ENSG00000132330	SCLY	0
chr2_147896301_147899898:+	circACVR2A	ACVR2A	hsa-miR-486-5p	ENSG00000132359	RAP1GAP2	0
chr2_147896301_147899898:+	circACVR2A	ACVR2A	hsa-miR-509-3p	ENSG00000132359	RAP1GAP2	0
chr6_108854225_108876350:+	circARMC2	ARMC2	hsa-miR-136-5p	ENSG00000132549	VPS13B	0
chr6_108854225_108876350:+	circARMC2	ARMC2	hsa-miR-143-3p	ENSG00000132549	VPS13B	0
chr2_147896301_147899898:+	circACVR2A	ACVR2A	hsa-miR-486-5p	ENSG00000132570	PCBD2	0
chr6_98899268_98927822:-	circFBXL4	FBXL4	hsa-miR-105-5p	ENSG00000132613	MTSS1L	0
chr6_98899268_98927822:-	circFBXL4	FBXL4	hsa-miR-127-3p	ENSG00000132613	MTSS1L	0
chr6_98899268_98927822:-	circFBXL4	FBXL4	hsa-miR-1307-3p	ENSG00000132613	MTSS1L	0
chr6_98899268_98927822:-	circFBXL4	FBXL4	hsa-miR-149-5p	ENSG00000132613	MTSS1L	0
chr6_98899268_98927822:-	circFBXL4	FBXL4	hsa-miR-185-5p	ENSG00000132613	MTSS1L	0
chr6_98899268_98927822:-	circFBXL4	FBXL4	hsa-miR-24-3p	ENSG00000132613	MTSS1L	0
chr6_98899268_98927822:-	circFBXL4	FBXL4	hsa-miR-3909	ENSG00000132613	MTSS1L	0
chr12_1263034_1290012:+	circERC1-1	ERC1	hsa-miR-133a-3p	ENSG00000132640	BTBD3	1
chr12_1263034_1290012:+	circERC1-1	ERC1	hsa-miR-133b	ENSG00000132640	BTBD3	1
chr12_1289852_1444750:+	circERC1-2	ERC1	hsa-miR-138-5p	ENSG00000132640	BTBD3	1
chr21_29321221_29329693:+	circBACH1	BACH1	hsa-miR-142-5p	ENSG00000132676	DAP3	0
chr2_147896301_147899898:+	circACVR2A	ACVR2A	hsa-miR-486-5p	ENSG00000132749	TESMIN	0
chr2_147896301_147899898:+	circACVR2A	ACVR2A	hsa-miR-509-3p	ENSG00000132749	TESMIN	0
chr6_108854225_108876350:+	circARMC2	ARMC2	hsa-miR-143-3p	ENSG00000132823	OSER1	0
chr12_1289852_1444750:+	circERC1-2	ERC1	hsa-miR-1301-3p	ENSG00000132849	PATJ	0
chr12_1289852_1444750:+	circERC1-2	ERC1	hsa-miR-138-5p	ENSG00000132849	PATJ	0
chr12_1289852_1444750:+	circERC1-2	ERC1	hsa-miR-1301-3p	ENSG00000133119	RFC3	0
chr12_1263034_1290012:+	circERC1-1	ERC1	hsa-miR-133a-3p	ENSG00000133119	RFC3	0
chr12_1263034_1290012:+	circERC1-1	ERC1	hsa-miR-133b	ENSG00000133119	RFC3	0
chr10_14896846_14897517:+	circSUV39H2	SUV39H2	hsa-miR-144-3p	ENSG00000133135	RNF128	0
chr10_14896846_14897517:+	circSUV39H2	SUV39H2	hsa-miR-380-3p	ENSG00000133135	RNF128	0
chr10_14896846_14897517:+	circSUV39H2	SUV39H2	hsa-miR-450b-5p	ENSG00000133135	RNF128	0
chr12_48939655_48941188:-	circAC073610.3,ARF3	AC073610.3,ARF3	hsa-miR-142-3p	ENSG00000134222	PSRC1	0
chr6_98899268_98927822:-	circFBXL4	FBXL4	hsa-miR-185-5p	ENSG00000134240	HMGCS2	0
chr6_98899268_98927822:-	circFBXL4	FBXL4	hsa-miR-21-5p	ENSG00000134240	HMGCS2	0
chr6_98899268_98927822:-	circFBXL4	FBXL4	hsa-miR-590-5p	ENSG00000134240	HMGCS2	0
chr6_108854225_108876350:+	circARMC2	ARMC2	hsa-miR-136-5p	ENSG00000134291	TMEM106C	0
chr18_56758865_56781656:+	circWDR7	WDR7	hsa-miR-135a-5p	ENSG00000134363	FST	0
chr18_56758865_56781656:+	circWDR7	WDR7	hsa-miR-135b-5p	ENSG00000134363	FST	0
chr10_50433476_50466932:-	circSGMS1	SGMS1	hsa-miR-421	ENSG00000134363	FST	0
chr21_29321221_29329693:+	circBACH1	BACH1	hsa-miR-150-5p	ENSG00000134470	IL15RA	0
chr21_29321221_29329693:+	circBACH1	BACH1	hsa-miR-15a-5p	ENSG00000134470	IL15RA	0
chr21_29321221_29329693:+	circBACH1	BACH1	hsa-miR-15b-5p	ENSG00000134470	IL15RA	0
chr21_29321221_29329693:+	circBACH1	BACH1	hsa-miR-16-5p	ENSG00000134470	IL15RA	0
chr21_29321221_29329693:+	circBACH1	BACH1	hsa-miR-195-5p	ENSG00000134470	IL15RA	0
chr21_29321221_29329693:+	circBACH1	BACH1	hsa-miR-424-5p	ENSG00000134470	IL15RA	0
chr21_29321221_29329693:+	circBACH1	BACH1	hsa-miR-497-5p	ENSG00000134470	IL15RA	0
chr6_98899268_98927822:-	circFBXL4	FBXL4	hsa-miR-149-5p	ENSG00000134508	CABLES1	0
chr6_98899268_98927822:-	circFBXL4	FBXL4	hsa-miR-182-5p	ENSG00000134508	CABLES1	0
chr6_98899268_98927822:-	circFBXL4	FBXL4	hsa-miR-199b-3p	ENSG00000134508	CABLES1	0
chr6_98899268_98927822:-	circFBXL4	FBXL4	hsa-miR-21-5p	ENSG00000134508	CABLES1	0
chr6_98899268_98927822:-	circFBXL4	FBXL4	hsa-miR-489-3p	ENSG00000134508	CABLES1	0
chr6_98899268_98927822:-	circFBXL4	FBXL4	hsa-miR-590-5p	ENSG00000134508	CABLES1	0
chr6_98899268_98927822:-	circFBXL4	FBXL4	hsa-miR-628-5p	ENSG00000134508	CABLES1	0
chr6_98899268_98927822:-	circFBXL4	FBXL4	hsa-miR-105-5p	ENSG00000134824	FADS2	0
chr6_98899268_98927822:-	circFBXL4	FBXL4	hsa-miR-149-5p	ENSG00000134824	FADS2	0
chr1_84179177_84197824:+	circPRKACB	PRKACB	hsa-miR-153-3p	ENSG00000134824	FADS2	0
chr6_98899268_98927822:-	circFBXL4	FBXL4	hsa-miR-153-3p	ENSG00000134824	FADS2	0
chr6_98899268_98927822:-	circFBXL4	FBXL4	hsa-miR-185-5p	ENSG00000134824	FADS2	0
chr6_98899268_98927822:-	circFBXL4	FBXL4	hsa-miR-199b-3p	ENSG00000134824	FADS2	0
chr6_98899268_98927822:-	circFBXL4	FBXL4	hsa-miR-24-3p	ENSG00000134824	FADS2	0
chr1_77801331_77815231:+	circMIGA1	MIGA1	hsa-miR-26a-5p	ENSG00000134824	FADS2	0
chr1_77801331_77815231:+	circMIGA1	MIGA1	hsa-miR-26b-5p	ENSG00000134824	FADS2	0
chr1_84179177_84197824:+	circPRKACB	PRKACB	hsa-miR-361-3p	ENSG00000134824	FADS2	0
chr6_98899268_98927822:-	circFBXL4	FBXL4	hsa-miR-378a-3p	ENSG00000134824	FADS2	0
chr1_77801331_77815231:+	circMIGA1	MIGA1	hsa-miR-432-5p	ENSG00000134824	FADS2	0
chr6_98899268_98927822:-	circFBXL4	FBXL4	hsa-miR-628-5p	ENSG00000134824	FADS2	0
chr2_147896301_147899898:+	circACVR2A	ACVR2A	hsa-miR-486-5p	ENSG00000134852	CLOCK	0
chr21_29321221_29329693:+	circBACH1	BACH1	hsa-miR-142-5p	ENSG00000134871	COL4A2	0
chr21_29321221_29329693:+	circBACH1	BACH1	hsa-miR-182-5p	ENSG00000134871	COL4A2	0
chr21_29321221_29329693:+	circBACH1	BACH1	hsa-miR-186-5p	ENSG00000134871	COL4A2	0
chr21_29321221_29329693:+	circBACH1	BACH1	hsa-miR-214-3p	ENSG00000134871	COL4A2	0
chr21_29321221_29329693:+	circBACH1	BACH1	hsa-miR-23a-3p	ENSG00000134871	COL4A2	0
chr21_29321221_29329693:+	circBACH1	BACH1	hsa-miR-23b-3p	ENSG00000134871	COL4A2	0
chr6_108854225_108876350:+	circARMC2	ARMC2	hsa-miR-143-3p	ENSG00000134874	DZIP1	0
chr12_1263034_1290012:+	circERC1-1	ERC1	hsa-miR-29a-3p	ENSG00000134909	ARHGAP32	0
chr12_1263034_1290012:+	circERC1-1	ERC1	hsa-miR-29b-3p	ENSG00000134909	ARHGAP32	0
chr12_1263034_1290012:+	circERC1-1	ERC1	hsa-miR-29c-3p	ENSG00000134909	ARHGAP32	0
chr21_29321221_29329693:+	circBACH1	BACH1	hsa-miR-141-3p	ENSG00000134954	ETS1	0
chr21_29321221_29329693:+	circBACH1	BACH1	hsa-miR-150-5p	ENSG00000134954	ETS1	0
chr21_29321221_29329693:+	circBACH1	BACH1	hsa-miR-15a-5p	ENSG00000134954	ETS1	0
chr21_29321221_29329693:+	circBACH1	BACH1	hsa-miR-15b-5p	ENSG00000134954	ETS1	0
chr21_29321221_29329693:+	circBACH1	BACH1	hsa-miR-16-5p	ENSG00000134954	ETS1	0
chr21_29321221_29329693:+	circBACH1	BACH1	hsa-miR-186-5p	ENSG00000134954	ETS1	0
chr21_29321221_29329693:+	circBACH1	BACH1	hsa-miR-195-5p	ENSG00000134954	ETS1	0
chr21_29321221_29329693:+	circBACH1	BACH1	hsa-miR-200a-3p	ENSG00000134954	ETS1	0
chr21_29321221_29329693:+	circBACH1	BACH1	hsa-miR-214-3p	ENSG00000134954	ETS1	0
chr21_29321221_29329693:+	circBACH1	BACH1	hsa-miR-2355-5p	ENSG00000134954	ETS1	0
chr21_29321221_29329693:+	circBACH1	BACH1	hsa-miR-23a-3p	ENSG00000134954	ETS1	0
chr21_29321221_29329693:+	circBACH1	BACH1	hsa-miR-23b-3p	ENSG00000134954	ETS1	0
chr21_29321221_29329693:+	circBACH1	BACH1	hsa-miR-28-3p	ENSG00000134954	ETS1	0
chr21_29321221_29329693:+	circBACH1	BACH1	hsa-miR-33a-5p	ENSG00000134954	ETS1	0
chr21_29321221_29329693:+	circBACH1	BACH1	hsa-miR-33b-5p	ENSG00000134954	ETS1	0
chr21_29321221_29329693:+	circBACH1	BACH1	hsa-miR-424-5p	ENSG00000134954	ETS1	0
chr21_29321221_29329693:+	circBACH1	BACH1	hsa-miR-425-5p	ENSG00000134954	ETS1	0
chr21_29321221_29329693:+	circBACH1	BACH1	hsa-miR-489-3p	ENSG00000134954	ETS1	0
chr21_29321221_29329693:+	circBACH1	BACH1	hsa-miR-497-5p	ENSG00000134954	ETS1	0
chr12_1263034_1290012:+	circERC1-1	ERC1	hsa-miR-29a-3p	ENSG00000134986	NREP	0
chr12_1263034_1290012:+	circERC1-1	ERC1	hsa-miR-29b-3p	ENSG00000134986	NREP	0
chr12_1263034_1290012:+	circERC1-1	ERC1	hsa-miR-29c-3p	ENSG00000134986	NREP	0
chr6_108854225_108876350:+	circARMC2	ARMC2	hsa-miR-143-3p	ENSG00000135045	C9orf40	0
chr12_1289852_1444750:+	circERC1-2	ERC1	hsa-miR-1301-3p	ENSG00000135083	CCNJL	0
chr12_1289852_1444750:+	circERC1-2	ERC1	hsa-miR-150-5p	ENSG00000135083	CCNJL	0
chr12_1263034_1290012:+	circERC1-1	ERC1	hsa-miR-29a-3p	ENSG00000135083	CCNJL	0
chr12_1263034_1290012:+	circERC1-1	ERC1	hsa-miR-29b-3p	ENSG00000135083	CCNJL	0
chr12_1263034_1290012:+	circERC1-1	ERC1	hsa-miR-29c-3p	ENSG00000135083	CCNJL	0
chr6_18236452_18258405:-	circDEK	DEK	hsa-miR-129-5p	ENSG00000135097	MSI1	0
chr6_98899268_98927822:-	circFBXL4	FBXL4	hsa-miR-1307-3p	ENSG00000135097	MSI1	0
chr6_98899268_98927822:-	circFBXL4	FBXL4	hsa-miR-149-5p	ENSG00000135097	MSI1	0
chr6_98899268_98927822:-	circFBXL4	FBXL4	hsa-miR-185-5p	ENSG00000135097	MSI1	0
chr6_98899268_98927822:-	circFBXL4	FBXL4	hsa-miR-21-5p	ENSG00000135097	MSI1	0
chr6_98899268_98927822:-	circFBXL4	FBXL4	hsa-miR-375	ENSG00000135097	MSI1	0
chr6_98899268_98927822:-	circFBXL4	FBXL4	hsa-miR-590-5p	ENSG00000135097	MSI1	0
chr2_147896301_147899898:+	circACVR2A	ACVR2A	hsa-miR-509-3p	ENSG00000135111	TBX3	0
chr21_29321221_29329693:+	circBACH1	BACH1	hsa-miR-141-3p	ENSG00000135218	CD36	0
chr21_29321221_29329693:+	circBACH1	BACH1	hsa-miR-200a-3p	ENSG00000135218	CD36	0
chr6_98899268_98927822:-	circFBXL4	FBXL4	hsa-miR-105-5p	ENSG00000135250	SRPK2	0
chr6_98899268_98927822:-	circFBXL4	FBXL4	hsa-miR-153-3p	ENSG00000135250	SRPK2	0
chr6_98899268_98927822:-	circFBXL4	FBXL4	hsa-miR-182-5p	ENSG00000135250	SRPK2	0
chr6_98899268_98927822:-	circFBXL4	FBXL4	hsa-miR-21-5p	ENSG00000135250	SRPK2	0
chr6_98899268_98927822:-	circFBXL4	FBXL4	hsa-miR-33a-5p	ENSG00000135250	SRPK2	0
chr6_98899268_98927822:-	circFBXL4	FBXL4	hsa-miR-33b-5p	ENSG00000135250	SRPK2	0
chr6_98899268_98927822:-	circFBXL4	FBXL4	hsa-miR-374a-5p	ENSG00000135250	SRPK2	0
chr6_98899268_98927822:-	circFBXL4	FBXL4	hsa-miR-374b-5p	ENSG00000135250	SRPK2	0
chr6_98899268_98927822:-	circFBXL4	FBXL4	hsa-miR-450b-5p	ENSG00000135250	SRPK2	0
chr6_98899268_98927822:-	circFBXL4	FBXL4	hsa-miR-489-3p	ENSG00000135250	SRPK2	0
chr6_98899268_98927822:-	circFBXL4	FBXL4	hsa-miR-499a-5p	ENSG00000135250	SRPK2	0
chr6_98899268_98927822:-	circFBXL4	FBXL4	hsa-miR-584-5p	ENSG00000135250	SRPK2	0
chr6_98899268_98927822:-	circFBXL4	FBXL4	hsa-miR-590-5p	ENSG00000135250	SRPK2	0
chr21_29321221_29329693:+	circBACH1	BACH1	hsa-miR-105-5p	ENSG00000135269	TES	0
chr21_29321221_29329693:+	circBACH1	BACH1	hsa-miR-142-5p	ENSG00000135269	TES	0
chr21_29321221_29329693:+	circBACH1	BACH1	hsa-miR-150-5p	ENSG00000135269	TES	0
chr21_29321221_29329693:+	circBACH1	BACH1	hsa-miR-186-5p	ENSG00000135269	TES	0
chr21_29321221_29329693:+	circBACH1	BACH1	hsa-miR-195-5p	ENSG00000135269	TES	0
chr21_29321221_29329693:+	circBACH1	BACH1	hsa-miR-214-3p	ENSG00000135269	TES	0
chr21_29321221_29329693:+	circBACH1	BACH1	hsa-miR-219a-2-3p	ENSG00000135269	TES	0
chr21_29321221_29329693:+	circBACH1	BACH1	hsa-miR-223-3p	ENSG00000135269	TES	0
chr21_29321221_29329693:+	circBACH1	BACH1	hsa-miR-23a-3p	ENSG00000135269	TES	0
chr21_29321221_29329693:+	circBACH1	BACH1	hsa-miR-23b-3p	ENSG00000135269	TES	0
chr21_29321221_29329693:+	circBACH1	BACH1	hsa-miR-33a-5p	ENSG00000135269	TES	0
chr21_29321221_29329693:+	circBACH1	BACH1	hsa-miR-33b-5p	ENSG00000135269	TES	0
chr21_29321221_29329693:+	circBACH1	BACH1	hsa-miR-625-5p	ENSG00000135269	TES	0
chr6_108854225_108876350:+	circARMC2	ARMC2	hsa-miR-136-5p	ENSG00000135315	CEP162	0
chr6_98899268_98927822:-	circFBXL4	FBXL4	hsa-miR-105-5p	ENSG00000135414	GDF11	0
chr6_98899268_98927822:-	circFBXL4	FBXL4	hsa-miR-149-5p	ENSG00000135414	GDF11	0
chr6_98899268_98927822:-	circFBXL4	FBXL4	hsa-miR-185-5p	ENSG00000135414	GDF11	0
chr6_98899268_98927822:-	circFBXL4	FBXL4	hsa-miR-24-3p	ENSG00000135414	GDF11	0
chr22_24302195_24313466:+	circSPECC1L,SPECC1L-ADORA2A	SPECC1L,SPECC1L-ADORA2A	hsa-miR-18a-5p	ENSG00000135469	COQ10A	0
chr22_24302195_24313466:+	circSPECC1L,SPECC1L-ADORA2A	SPECC1L,SPECC1L-ADORA2A	hsa-miR-18b-5p	ENSG00000135469	COQ10A	0
chr6_98899268_98927822:-	circFBXL4	FBXL4	hsa-miR-105-5p	ENSG00000135540	NHSL1	0
chr6_98899268_98927822:-	circFBXL4	FBXL4	hsa-miR-142-3p	ENSG00000135540	NHSL1	0
chr1_84179177_84197824:+	circPRKACB	PRKACB	hsa-miR-153-3p	ENSG00000135540	NHSL1	0
chr6_98899268_98927822:-	circFBXL4	FBXL4	hsa-miR-153-3p	ENSG00000135540	NHSL1	0
chr6_98899268_98927822:-	circFBXL4	FBXL4	hsa-miR-185-5p	ENSG00000135540	NHSL1	0
chr1_77801331_77815231:+	circMIGA1	MIGA1	hsa-miR-26a-5p	ENSG00000135540	NHSL1	0
chr1_77801331_77815231:+	circMIGA1	MIGA1	hsa-miR-26b-5p	ENSG00000135540	NHSL1	0
chr1_84179177_84197824:+	circPRKACB	PRKACB	hsa-miR-361-3p	ENSG00000135540	NHSL1	0
chr1_84179177_84197824:+	circPRKACB	PRKACB	hsa-miR-369-3p	ENSG00000135540	NHSL1	0
chr6_98899268_98927822:-	circFBXL4	FBXL4	hsa-miR-374a-5p	ENSG00000135540	NHSL1	0
chr6_98899268_98927822:-	circFBXL4	FBXL4	hsa-miR-374b-5p	ENSG00000135540	NHSL1	0
chr6_98899268_98927822:-	circFBXL4	FBXL4	hsa-miR-105-5p	ENSG00000135547	HEY2	0
chr6_98899268_98927822:-	circFBXL4	FBXL4	hsa-miR-153-3p	ENSG00000135547	HEY2	0
chr6_98899268_98927822:-	circFBXL4	FBXL4	hsa-miR-185-5p	ENSG00000135547	HEY2	0
chr6_98899268_98927822:-	circFBXL4	FBXL4	hsa-miR-199b-3p	ENSG00000135547	HEY2	0
chr6_98899268_98927822:-	circFBXL4	FBXL4	hsa-miR-628-5p	ENSG00000135547	HEY2	0
chr6_108854225_108876350:+	circARMC2	ARMC2	hsa-miR-143-3p	ENSG00000135605	TEC	0
chr6_108854225_108876350:+	circARMC2	ARMC2	hsa-miR-136-5p	ENSG00000135837	CEP350	0
chr6_108854225_108876350:+	circARMC2	ARMC2	hsa-miR-143-3p	ENSG00000135837	CEP350	0
chr21_29321221_29329693:+	circBACH1	BACH1	hsa-miR-214-3p	ENSG00000135912	TTLL4	0
chr12_1263034_1290012:+	circERC1-1	ERC1	hsa-miR-29b-3p	ENSG00000135945	REV1	0
chr6_108854225_108876350:+	circARMC2	ARMC2	hsa-miR-143-3p	ENSG00000136021	SCYL2	0
chr21_29321221_29329693:+	circBACH1	BACH1	hsa-miR-103a-3p	ENSG00000136048	DRAM1	0
chr21_29321221_29329693:+	circBACH1	BACH1	hsa-miR-105-5p	ENSG00000136048	DRAM1	0
chr21_29321221_29329693:+	circBACH1	BACH1	hsa-miR-107	ENSG00000136048	DRAM1	0
chr21_29321221_29329693:+	circBACH1	BACH1	hsa-miR-142-5p	ENSG00000136048	DRAM1	0
chr21_29321221_29329693:+	circBACH1	BACH1	hsa-miR-150-5p	ENSG00000136048	DRAM1	0
chr21_29321221_29329693:+	circBACH1	BACH1	hsa-miR-15a-5p	ENSG00000136048	DRAM1	0
chr21_29321221_29329693:+	circBACH1	BACH1	hsa-miR-15b-5p	ENSG00000136048	DRAM1	0
chr21_29321221_29329693:+	circBACH1	BACH1	hsa-miR-16-5p	ENSG00000136048	DRAM1	0
chr21_29321221_29329693:+	circBACH1	BACH1	hsa-miR-195-5p	ENSG00000136048	DRAM1	0
chr21_29321221_29329693:+	circBACH1	BACH1	hsa-miR-33a-5p	ENSG00000136048	DRAM1	0
chr21_29321221_29329693:+	circBACH1	BACH1	hsa-miR-33b-5p	ENSG00000136048	DRAM1	0
chr21_29321221_29329693:+	circBACH1	BACH1	hsa-miR-424-5p	ENSG00000136048	DRAM1	0
chr21_29321221_29329693:+	circBACH1	BACH1	hsa-miR-494-3p	ENSG00000136048	DRAM1	0
chr21_29321221_29329693:+	circBACH1	BACH1	hsa-miR-497-5p	ENSG00000136048	DRAM1	0
chr12_1263034_1290012:+	circERC1-1	ERC1	hsa-miR-133a-3p	ENSG00000136141	LRCH1	0
chr12_1263034_1290012:+	circERC1-1	ERC1	hsa-miR-133b	ENSG00000136141	LRCH1	0
chr21_29321221_29329693:+	circBACH1	BACH1	hsa-miR-2681-3p	ENSG00000136147	PHF11	0
chr21_29321221_29329693:+	circBACH1	BACH1	hsa-miR-489-3p	ENSG00000136147	PHF11	0
chr21_29321221_29329693:+	circBACH1	BACH1	hsa-miR-497-5p	ENSG00000136147	PHF11	0
chr6_98899268_98927822:-	circFBXL4	FBXL4	hsa-miR-1307-3p	ENSG00000136205	TNS3	0
chr6_98899268_98927822:-	circFBXL4	FBXL4	hsa-miR-149-5p	ENSG00000136205	TNS3	0
chr6_98899268_98927822:-	circFBXL4	FBXL4	hsa-miR-182-5p	ENSG00000136205	TNS3	0
chr6_98899268_98927822:-	circFBXL4	FBXL4	hsa-miR-21-5p	ENSG00000136205	TNS3	0
chr6_98899268_98927822:-	circFBXL4	FBXL4	hsa-miR-375	ENSG00000136205	TNS3	0
chr6_98899268_98927822:-	circFBXL4	FBXL4	hsa-miR-378a-3p	ENSG00000136205	TNS3	0
chr6_98899268_98927822:-	circFBXL4	FBXL4	hsa-miR-378d	ENSG00000136205	TNS3	0
chr6_98899268_98927822:-	circFBXL4	FBXL4	hsa-miR-450b-5p	ENSG00000136205	TNS3	0
chr6_98899268_98927822:-	circFBXL4	FBXL4	hsa-miR-590-5p	ENSG00000136205	TNS3	0
chr6_98899268_98927822:-	circFBXL4	FBXL4	hsa-miR-628-5p	ENSG00000136205	TNS3	0
chr6_108854225_108876350:+	circARMC2	ARMC2	hsa-miR-143-3p	ENSG00000136444	RSAD1	0
chr6_108854225_108876350:+	circARMC2	ARMC2	hsa-miR-136-5p	ENSG00000136448	NMT1	0
chr6_108854225_108876350:+	circARMC2	ARMC2	hsa-miR-143-3p	ENSG00000136448	NMT1	0
chr12_1263034_1290012:+	circERC1-1	ERC1	hsa-miR-29a-3p	ENSG00000136457	CHAD	0
chr12_1263034_1290012:+	circERC1-1	ERC1	hsa-miR-29b-3p	ENSG00000136457	CHAD	0
chr12_1263034_1290012:+	circERC1-1	ERC1	hsa-miR-29c-3p	ENSG00000136457	CHAD	0
chr6_108854225_108876350:+	circARMC2	ARMC2	hsa-miR-143-3p	ENSG00000136536	2020-03-07	0
chr21_29321221_29329693:+	circBACH1	BACH1	hsa-miR-105-5p	ENSG00000136560	TANK	0
chr21_29321221_29329693:+	circBACH1	BACH1	hsa-miR-186-5p	ENSG00000136560	TANK	0
chr21_29321221_29329693:+	circBACH1	BACH1	hsa-miR-23a-3p	ENSG00000136560	TANK	0
chr21_29321221_29329693:+	circBACH1	BACH1	hsa-miR-23b-3p	ENSG00000136560	TANK	0
chr21_29321221_29329693:+	circBACH1	BACH1	hsa-miR-28-3p	ENSG00000136560	TANK	0
chr21_29321221_29329693:+	circBACH1	BACH1	hsa-miR-489-3p	ENSG00000136560	TANK	0
chr21_29321221_29329693:+	circBACH1	BACH1	hsa-miR-494-3p	ENSG00000136560	TANK	0
chr12_1263034_1290012:+	circERC1-1	ERC1	hsa-miR-29a-3p	ENSG00000136709	WDR33	0
chr12_1263034_1290012:+	circERC1-1	ERC1	hsa-miR-29b-3p	ENSG00000136709	WDR33	0
chr12_1263034_1290012:+	circERC1-1	ERC1	hsa-miR-29c-3p	ENSG00000136709	WDR33	0
chr21_29321221_29329693:+	circBACH1	BACH1	hsa-miR-150-5p	ENSG00000136770	DNAJC1	0
chr12_1263034_1290012:+	circERC1-1	ERC1	hsa-miR-29a-3p	ENSG00000136848	DAB2IP	0
chr12_1263034_1290012:+	circERC1-1	ERC1	hsa-miR-29b-3p	ENSG00000136848	DAB2IP	0
chr12_1263034_1290012:+	circERC1-1	ERC1	hsa-miR-29c-3p	ENSG00000136848	DAB2IP	0
chr6_108854225_108876350:+	circARMC2	ARMC2	hsa-miR-143-3p	ENSG00000136875	PRPF4	0
chr18_56758865_56781656:+	circWDR7	WDR7	hsa-miR-128-3p	ENSG00000136944	LMX1B	0
chr18_56758865_56781656:+	circWDR7	WDR7	hsa-miR-135a-5p	ENSG00000136944	LMX1B	0
chr18_56758865_56781656:+	circWDR7	WDR7	hsa-miR-135b-5p	ENSG00000136944	LMX1B	0
chr12_1263034_1290012:+	circERC1-1	ERC1	hsa-miR-133a-3p	ENSG00000137203	TFAP2A	0
chr12_1263034_1290012:+	circERC1-1	ERC1	hsa-miR-133b	ENSG00000137203	TFAP2A	0
chr18_56758865_56781656:+	circWDR7	WDR7	hsa-miR-103a-3p	ENSG00000137265	IRF4	0
chr18_56758865_56781656:+	circWDR7	WDR7	hsa-miR-107	ENSG00000137265	IRF4	0
chr18_56758865_56781656:+	circWDR7	WDR7	hsa-miR-128-3p	ENSG00000137265	IRF4	0
chr18_56758865_56781656:+	circWDR7	WDR7	hsa-miR-135a-5p	ENSG00000137265	IRF4	0
chr18_56758865_56781656:+	circWDR7	WDR7	hsa-miR-135b-5p	ENSG00000137265	IRF4	0
chr18_56758865_56781656:+	circWDR7	WDR7	hsa-miR-148a-3p	ENSG00000137265	IRF4	0
chr18_56758865_56781656:+	circWDR7	WDR7	hsa-miR-148b-3p	ENSG00000137265	IRF4	0
chr18_56758865_56781656:+	circWDR7	WDR7	hsa-miR-152-3p	ENSG00000137265	IRF4	0
chr21_29321221_29329693:+	circBACH1	BACH1	hsa-miR-103a-3p	ENSG00000137393	RNF144B	0
chr21_29321221_29329693:+	circBACH1	BACH1	hsa-miR-105-5p	ENSG00000137393	RNF144B	0
chr21_29321221_29329693:+	circBACH1	BACH1	hsa-miR-107	ENSG00000137393	RNF144B	0
chr21_29321221_29329693:+	circBACH1	BACH1	hsa-miR-141-3p	ENSG00000137393	RNF144B	0
chr21_29321221_29329693:+	circBACH1	BACH1	hsa-miR-142-5p	ENSG00000137393	RNF144B	0
chr21_29321221_29329693:+	circBACH1	BACH1	hsa-miR-15a-5p	ENSG00000137393	RNF144B	0
chr21_29321221_29329693:+	circBACH1	BACH1	hsa-miR-15b-5p	ENSG00000137393	RNF144B	0
chr21_29321221_29329693:+	circBACH1	BACH1	hsa-miR-16-5p	ENSG00000137393	RNF144B	0
chr21_29321221_29329693:+	circBACH1	BACH1	hsa-miR-182-5p	ENSG00000137393	RNF144B	0
chr21_29321221_29329693:+	circBACH1	BACH1	hsa-miR-186-5p	ENSG00000137393	RNF144B	0
chr21_29321221_29329693:+	circBACH1	BACH1	hsa-miR-195-5p	ENSG00000137393	RNF144B	0
chr21_29321221_29329693:+	circBACH1	BACH1	hsa-miR-200a-3p	ENSG00000137393	RNF144B	0
chr21_29321221_29329693:+	circBACH1	BACH1	hsa-miR-214-3p	ENSG00000137393	RNF144B	0
chr21_29321221_29329693:+	circBACH1	BACH1	hsa-miR-223-3p	ENSG00000137393	RNF144B	0
chr21_29321221_29329693:+	circBACH1	BACH1	hsa-miR-23a-3p	ENSG00000137393	RNF144B	0
chr21_29321221_29329693:+	circBACH1	BACH1	hsa-miR-23b-3p	ENSG00000137393	RNF144B	0
chr21_29321221_29329693:+	circBACH1	BACH1	hsa-miR-2681-3p	ENSG00000137393	RNF144B	0
chr21_29321221_29329693:+	circBACH1	BACH1	hsa-miR-409-3p	ENSG00000137393	RNF144B	0
chr21_29321221_29329693:+	circBACH1	BACH1	hsa-miR-424-5p	ENSG00000137393	RNF144B	0
chr21_29321221_29329693:+	circBACH1	BACH1	hsa-miR-494-3p	ENSG00000137393	RNF144B	0
chr21_29321221_29329693:+	circBACH1	BACH1	hsa-miR-497-5p	ENSG00000137393	RNF144B	0
chr6_98899268_98927822:-	circFBXL4	FBXL4	hsa-miR-149-5p	ENSG00000137440	FGFBP1	0
chr6_98899268_98927822:-	circFBXL4	FBXL4	hsa-miR-24-3p	ENSG00000137440	FGFBP1	0
chr6_98899268_98927822:-	circFBXL4	FBXL4	hsa-miR-489-3p	ENSG00000137440	FGFBP1	0
chr6_108854225_108876350:+	circARMC2	ARMC2	hsa-miR-136-5p	ENSG00000137504	CREBZF	0
chr6_108854225_108876350:+	circARMC2	ARMC2	hsa-miR-143-3p	ENSG00000137504	CREBZF	0
chr6_108854225_108876350:+	circARMC2	ARMC2	hsa-miR-136-5p	ENSG00000137574	TGS1	0
chr2_147896301_147899898:+	circACVR2A	ACVR2A	hsa-miR-509-3p	ENSG00000137642	SORL1	1
chr6_98899268_98927822:-	circFBXL4	FBXL4	hsa-miR-105-5p	ENSG00000137699	TRIM29	0
chr6_98899268_98927822:-	circFBXL4	FBXL4	hsa-miR-185-5p	ENSG00000137699	TRIM29	0
chr6_98899268_98927822:-	circFBXL4	FBXL4	hsa-miR-199b-3p	ENSG00000137699	TRIM29	0
chr6_98899268_98927822:-	circFBXL4	FBXL4	hsa-miR-3909	ENSG00000137699	TRIM29	0
chr6_98899268_98927822:-	circFBXL4	FBXL4	hsa-miR-450b-5p	ENSG00000137699	TRIM29	0
chr18_76849526_76881512:+	circZNF236	ZNF236	hsa-miR-1286	ENSG00000137802	MAPKBP1	0
chr12_1263034_1290012:+	circERC1-1	ERC1	hsa-miR-29a-3p	ENSG00000137802	MAPKBP1	0
chr12_1263034_1290012:+	circERC1-1	ERC1	hsa-miR-29b-3p	ENSG00000137802	MAPKBP1	0
chr12_1263034_1290012:+	circERC1-1	ERC1	hsa-miR-29c-3p	ENSG00000137802	MAPKBP1	0
chr18_76849526_76881512:+	circZNF236	ZNF236	hsa-miR-345-5p	ENSG00000137802	MAPKBP1	0
chr12_1289852_1444750:+	circERC1-2	ERC1	hsa-miR-1301-3p	ENSG00000137821	LRRC49	0
chr6_108854225_108876350:+	circARMC2	ARMC2	hsa-miR-136-5p	ENSG00000137942	FNBP1L	1
chr6_108854225_108876350:+	circARMC2	ARMC2	hsa-miR-143-3p	ENSG00000137942	FNBP1L	1
chr12_1263034_1290012:+	circERC1-1	ERC1	hsa-miR-29a-3p	ENSG00000137962	ARHGAP29	0
chr12_1263034_1290012:+	circERC1-1	ERC1	hsa-miR-29b-3p	ENSG00000137962	ARHGAP29	0
chr12_1263034_1290012:+	circERC1-1	ERC1	hsa-miR-29c-3p	ENSG00000137962	ARHGAP29	0
chr21_29321221_29329693:+	circBACH1	BACH1	hsa-miR-105-5p	ENSG00000138185	ENTPD1	0
chr21_29321221_29329693:+	circBACH1	BACH1	hsa-miR-142-5p	ENSG00000138185	ENTPD1	0
chr21_29321221_29329693:+	circBACH1	BACH1	hsa-miR-150-5p	ENSG00000138185	ENTPD1	0
chr21_29321221_29329693:+	circBACH1	BACH1	hsa-miR-489-3p	ENSG00000138185	ENTPD1	0
chr12_1289852_1444750:+	circERC1-2	ERC1	hsa-miR-150-5p	ENSG00000138336	TET1	0
chr12_1263034_1290012:+	circERC1-1	ERC1	hsa-miR-29a-3p	ENSG00000138336	TET1	0
chr12_1263034_1290012:+	circERC1-1	ERC1	hsa-miR-29b-3p	ENSG00000138336	TET1	0
chr12_1263034_1290012:+	circERC1-1	ERC1	hsa-miR-29c-3p	ENSG00000138336	TET1	0
chr1_84179177_84197824:+	circPRKACB	PRKACB	hsa-miR-153-3p	ENSG00000138449	SLC40A1	0
chr1_84179177_84197824:+	circPRKACB	PRKACB	hsa-miR-2681-5p	ENSG00000138449	SLC40A1	0
chr21_29321221_29329693:+	circBACH1	BACH1	hsa-miR-141-3p	ENSG00000138600	SPPL2A	0
chr21_29321221_29329693:+	circBACH1	BACH1	hsa-miR-142-5p	ENSG00000138600	SPPL2A	0
chr21_29321221_29329693:+	circBACH1	BACH1	hsa-miR-182-5p	ENSG00000138600	SPPL2A	0
chr21_29321221_29329693:+	circBACH1	BACH1	hsa-miR-186-5p	ENSG00000138600	SPPL2A	0
chr21_29321221_29329693:+	circBACH1	BACH1	hsa-miR-200a-3p	ENSG00000138600	SPPL2A	0
chr21_29321221_29329693:+	circBACH1	BACH1	hsa-miR-223-3p	ENSG00000138600	SPPL2A	0
chr21_29321221_29329693:+	circBACH1	BACH1	hsa-miR-425-5p	ENSG00000138600	SPPL2A	0
chr6_98899268_98927822:-	circFBXL4	FBXL4	hsa-miR-182-5p	ENSG00000138696	BMPR1B	0
chr6_98899268_98927822:-	circFBXL4	FBXL4	hsa-miR-374a-5p	ENSG00000138696	BMPR1B	0
chr6_98899268_98927822:-	circFBXL4	FBXL4	hsa-miR-374b-5p	ENSG00000138696	BMPR1B	0
chr6_98899268_98927822:-	circFBXL4	FBXL4	hsa-miR-375	ENSG00000138696	BMPR1B	0
chr6_98899268_98927822:-	circFBXL4	FBXL4	hsa-miR-3909	ENSG00000138696	BMPR1B	0
chr21_29321221_29329693:+	circBACH1	BACH1	hsa-miR-105-5p	ENSG00000138756	BMP2K	0
chr21_29321221_29329693:+	circBACH1	BACH1	hsa-miR-142-5p	ENSG00000138756	BMP2K	0
chr21_29321221_29329693:+	circBACH1	BACH1	hsa-miR-182-5p	ENSG00000138756	BMP2K	0
chr21_29321221_29329693:+	circBACH1	BACH1	hsa-miR-186-5p	ENSG00000138756	BMP2K	0
chr21_29321221_29329693:+	circBACH1	BACH1	hsa-miR-223-3p	ENSG00000138756	BMP2K	0
chr21_29321221_29329693:+	circBACH1	BACH1	hsa-miR-23a-3p	ENSG00000138756	BMP2K	0
chr21_29321221_29329693:+	circBACH1	BACH1	hsa-miR-23b-3p	ENSG00000138756	BMP2K	0
chr21_29321221_29329693:+	circBACH1	BACH1	hsa-miR-28-3p	ENSG00000138756	BMP2K	0
chr21_29321221_29329693:+	circBACH1	BACH1	hsa-miR-33a-5p	ENSG00000138756	BMP2K	0
chr21_29321221_29329693:+	circBACH1	BACH1	hsa-miR-33b-5p	ENSG00000138756	BMP2K	0
chr21_29321221_29329693:+	circBACH1	BACH1	hsa-miR-374b-3p	ENSG00000138756	BMP2K	0
chr21_29321221_29329693:+	circBACH1	BACH1	hsa-miR-494-3p	ENSG00000138756	BMP2K	0
chr21_29321221_29329693:+	circBACH1	BACH1	hsa-miR-625-5p	ENSG00000138756	BMP2K	0
chr12_1263034_1290012:+	circERC1-1	ERC1	hsa-miR-29a-3p	ENSG00000138764	CCNG2	0
chr12_1263034_1290012:+	circERC1-1	ERC1	hsa-miR-29b-3p	ENSG00000138764	CCNG2	0
chr12_1263034_1290012:+	circERC1-1	ERC1	hsa-miR-29c-3p	ENSG00000138764	CCNG2	0
chr10_50433476_50466932:-	circSGMS1	SGMS1	hsa-miR-324-5p	ENSG00000138771	SHROOM3	0
chr10_50433476_50466932:-	circSGMS1	SGMS1	hsa-miR-337-3p	ENSG00000138771	SHROOM3	0
chr10_50433476_50466932:-	circSGMS1	SGMS1	hsa-miR-543	ENSG00000138771	SHROOM3	0
chr10_50433476_50466932:-	circSGMS1	SGMS1	hsa-miR-324-5p	ENSG00000138835	RGS3	0
chr10_50433476_50466932:-	circSGMS1	SGMS1	hsa-miR-337-3p	ENSG00000138835	RGS3	0
chr10_50433476_50466932:-	circSGMS1	SGMS1	hsa-miR-452-5p	ENSG00000138942	RNF185	0
chr6_108854225_108876350:+	circARMC2	ARMC2	hsa-miR-136-5p	ENSG00000139154	AEBP2	0
chr3_183650296_183672484:+	circKLHL24	KLHL24	hsa-miR-129-5p	ENSG00000139354	GAS2L3	0
chr21_29321221_29329693:+	circBACH1	BACH1	hsa-miR-142-5p	ENSG00000139354	GAS2L3	0
chr21_29321221_29329693:+	circBACH1	BACH1	hsa-miR-15a-5p	ENSG00000139354	GAS2L3	0
chr21_29321221_29329693:+	circBACH1	BACH1	hsa-miR-15b-5p	ENSG00000139354	GAS2L3	0
chr21_29321221_29329693:+	circBACH1	BACH1	hsa-miR-16-5p	ENSG00000139354	GAS2L3	0
chr21_29321221_29329693:+	circBACH1	BACH1	hsa-miR-182-5p	ENSG00000139354	GAS2L3	0
chr3_183650296_183672484:+	circKLHL24	KLHL24	hsa-miR-182-5p	ENSG00000139354	GAS2L3	0
chr21_29321221_29329693:+	circBACH1	BACH1	hsa-miR-186-5p	ENSG00000139354	GAS2L3	0
chr3_183650296_183672484:+	circKLHL24	KLHL24	hsa-miR-194-5p	ENSG00000139354	GAS2L3	0
chr21_29321221_29329693:+	circBACH1	BACH1	hsa-miR-195-5p	ENSG00000139354	GAS2L3	0
chr21_29321221_29329693:+	circBACH1	BACH1	hsa-miR-23a-3p	ENSG00000139354	GAS2L3	0
chr21_29321221_29329693:+	circBACH1	BACH1	hsa-miR-23b-3p	ENSG00000139354	GAS2L3	0
chr3_183650296_183672484:+	circKLHL24	KLHL24	hsa-miR-28-5p	ENSG00000139354	GAS2L3	0
chr21_29321221_29329693:+	circBACH1	BACH1	hsa-miR-374b-3p	ENSG00000139354	GAS2L3	0
chr21_29321221_29329693:+	circBACH1	BACH1	hsa-miR-424-5p	ENSG00000139354	GAS2L3	0
chr21_29321221_29329693:+	circBACH1	BACH1	hsa-miR-494-3p	ENSG00000139354	GAS2L3	0
chr21_29321221_29329693:+	circBACH1	BACH1	hsa-miR-497-5p	ENSG00000139354	GAS2L3	0
chr18_56758865_56781656:+	circWDR7	WDR7	hsa-miR-128-3p	ENSG00000139445	FOXN4	0
chr18_56758865_56781656:+	circWDR7	WDR7	hsa-miR-148a-3p	ENSG00000139445	FOXN4	0
chr18_56758865_56781656:+	circWDR7	WDR7	hsa-miR-148b-3p	ENSG00000139445	FOXN4	0
chr18_56758865_56781656:+	circWDR7	WDR7	hsa-miR-152-3p	ENSG00000139445	FOXN4	0
chr12_1289852_1444750:+	circERC1-2	ERC1	hsa-miR-138-5p	ENSG00000139546	TARBP2	0
chr12_1263034_1290012:+	circERC1-1	ERC1	hsa-miR-29a-3p	ENSG00000139546	TARBP2	0
chr12_1263034_1290012:+	circERC1-1	ERC1	hsa-miR-29b-3p	ENSG00000139546	TARBP2	0
chr12_1263034_1290012:+	circERC1-1	ERC1	hsa-miR-29c-3p	ENSG00000139546	TARBP2	0
chr2_147896301_147899898:+	circACVR2A	ACVR2A	hsa-miR-486-5p	ENSG00000139644	TMBIM6	0
chr2_147896301_147899898:+	circACVR2A	ACVR2A	hsa-miR-509-3p	ENSG00000139644	TMBIM6	0
chr12_1263034_1290012:+	circERC1-1	ERC1	hsa-miR-133a-3p	ENSG00000139651	ZNF740	0
chr12_1263034_1290012:+	circERC1-1	ERC1	hsa-miR-133b	ENSG00000139651	ZNF740	0
chr12_1263034_1290012:+	circERC1-1	ERC1	hsa-miR-29a-3p	ENSG00000139651	ZNF740	0
chr12_1263034_1290012:+	circERC1-1	ERC1	hsa-miR-29b-3p	ENSG00000139651	ZNF740	0
chr12_1263034_1290012:+	circERC1-1	ERC1	hsa-miR-29c-3p	ENSG00000139651	ZNF740	0
chr10_50433476_50466932:-	circSGMS1	SGMS1	hsa-miR-324-5p	ENSG00000139722	VPS37B	0
chr10_50433476_50466932:-	circSGMS1	SGMS1	hsa-miR-421	ENSG00000139722	VPS37B	0
chr12_1263034_1290012:+	circERC1-1	ERC1	hsa-miR-29a-3p	ENSG00000139800	ZIC5	0
chr12_1263034_1290012:+	circERC1-1	ERC1	hsa-miR-29b-3p	ENSG00000139800	ZIC5	0
chr12_1263034_1290012:+	circERC1-1	ERC1	hsa-miR-29c-3p	ENSG00000139800	ZIC5	0
chr12_1289852_1444750:+	circERC1-2	ERC1	hsa-miR-138-5p	ENSG00000139899	CBLN3	0
chr12_1263034_1290012:+	circERC1-1	ERC1	hsa-miR-29a-3p	ENSG00000139926	FRMD6	0
chr12_1263034_1290012:+	circERC1-1	ERC1	hsa-miR-29b-3p	ENSG00000139926	FRMD6	0
chr12_1263034_1290012:+	circERC1-1	ERC1	hsa-miR-29c-3p	ENSG00000139926	FRMD6	0
chr12_1263034_1290012:+	circERC1-1	ERC1	hsa-miR-29a-3p	ENSG00000139946	PELI2	0
chr12_1263034_1290012:+	circERC1-1	ERC1	hsa-miR-29b-3p	ENSG00000139946	PELI2	0
chr12_1263034_1290012:+	circERC1-1	ERC1	hsa-miR-29c-3p	ENSG00000139946	PELI2	0
chr3_183650296_183672484:+	circKLHL24	KLHL24	hsa-miR-129-5p	ENSG00000140092	FBLN5	0
chr21_29321221_29329693:+	circBACH1	BACH1	hsa-miR-150-5p	ENSG00000140092	FBLN5	0
chr21_29321221_29329693:+	circBACH1	BACH1	hsa-miR-214-3p	ENSG00000140092	FBLN5	0
chr21_29321221_29329693:+	circBACH1	BACH1	hsa-miR-33a-5p	ENSG00000140092	FBLN5	0
chr21_29321221_29329693:+	circBACH1	BACH1	hsa-miR-33b-5p	ENSG00000140092	FBLN5	0
chr3_183650296_183672484:+	circKLHL24	KLHL24	hsa-miR-361-5p	ENSG00000140092	FBLN5	0
chr3_183650296_183672484:+	circKLHL24	KLHL24	hsa-miR-376c-3p	ENSG00000140092	FBLN5	0
chr10_50433476_50466932:-	circSGMS1	SGMS1	hsa-miR-543	ENSG00000140263	SORD	0
chr10_50433476_50466932:-	circSGMS1	SGMS1	hsa-miR-543	ENSG00000140403	DNAJA4	0
chr6_98899268_98927822:-	circFBXL4	FBXL4	hsa-miR-185-5p	ENSG00000140545	MFGE8	0
chr2_147896301_147899898:+	circACVR2A	ACVR2A	hsa-miR-486-5p	ENSG00000140688	C16orf58	0
chr6_98899268_98927822:-	circFBXL4	FBXL4	hsa-miR-105-5p	ENSG00000141448	GATA6	0
chr6_98899268_98927822:-	circFBXL4	FBXL4	hsa-miR-149-5p	ENSG00000141448	GATA6	0
chr6_98899268_98927822:-	circFBXL4	FBXL4	hsa-miR-375	ENSG00000141448	GATA6	0
chr6_98899268_98927822:-	circFBXL4	FBXL4	hsa-miR-378a-3p	ENSG00000141448	GATA6	0
chr6_98899268_98927822:-	circFBXL4	FBXL4	hsa-miR-105-5p	ENSG00000141485	SLC13A5	0
chr6_98899268_98927822:-	circFBXL4	FBXL4	hsa-miR-1307-3p	ENSG00000141485	SLC13A5	0
chr6_98899268_98927822:-	circFBXL4	FBXL4	hsa-miR-182-5p	ENSG00000141485	SLC13A5	0
chr2_147896301_147899898:+	circACVR2A	ACVR2A	hsa-miR-486-5p	ENSG00000141622	RNF165	0
chr6_98899268_98927822:-	circFBXL4	FBXL4	hsa-miR-105-5p	ENSG00000141682	PMAIP1	0
chr6_98899268_98927822:-	circFBXL4	FBXL4	hsa-miR-142-3p	ENSG00000141682	PMAIP1	0
chr6_98899268_98927822:-	circFBXL4	FBXL4	hsa-miR-153-3p	ENSG00000141682	PMAIP1	0
chr6_98899268_98927822:-	circFBXL4	FBXL4	hsa-miR-182-5p	ENSG00000141682	PMAIP1	0
chr6_98899268_98927822:-	circFBXL4	FBXL4	hsa-miR-199b-3p	ENSG00000141682	PMAIP1	0
chr6_98899268_98927822:-	circFBXL4	FBXL4	hsa-miR-374a-5p	ENSG00000141682	PMAIP1	0
chr6_98899268_98927822:-	circFBXL4	FBXL4	hsa-miR-374b-5p	ENSG00000141682	PMAIP1	0
chr6_98899268_98927822:-	circFBXL4	FBXL4	hsa-miR-375	ENSG00000141682	PMAIP1	0
chr6_98899268_98927822:-	circFBXL4	FBXL4	hsa-miR-499a-5p	ENSG00000141682	PMAIP1	0
chr6_98899268_98927822:-	circFBXL4	FBXL4	hsa-miR-628-5p	ENSG00000141682	PMAIP1	0
chr6_98899268_98927822:-	circFBXL4	FBXL4	hsa-miR-105-5p	ENSG00000141736	ERBB2	0
chr6_98899268_98927822:-	circFBXL4	FBXL4	hsa-miR-185-5p	ENSG00000141736	ERBB2	0
chr6_98899268_98927822:-	circFBXL4	FBXL4	hsa-miR-375	ENSG00000141736	ERBB2	0
chr6_98899268_98927822:-	circFBXL4	FBXL4	hsa-miR-378a-3p	ENSG00000141736	ERBB2	0
chr6_98899268_98927822:-	circFBXL4	FBXL4	hsa-miR-378d	ENSG00000141736	ERBB2	0
chr6_98899268_98927822:-	circFBXL4	FBXL4	hsa-miR-3909	ENSG00000141736	ERBB2	0
chr6_98899268_98927822:-	circFBXL4	FBXL4	hsa-miR-450b-5p	ENSG00000141736	ERBB2	0
chr12_1263034_1290012:+	circERC1-1	ERC1	hsa-miR-29a-3p	ENSG00000141738	GRB7	0
chr12_1263034_1290012:+	circERC1-1	ERC1	hsa-miR-29b-3p	ENSG00000141738	GRB7	0
chr12_1263034_1290012:+	circERC1-1	ERC1	hsa-miR-29c-3p	ENSG00000141738	GRB7	0
chr21_29321221_29329693:+	circBACH1	BACH1	hsa-miR-182-5p	ENSG00000142102	PGGHG	0
chr21_29321221_29329693:+	circBACH1	BACH1	hsa-miR-425-5p	ENSG00000142102	PGGHG	0
chr21_29321221_29329693:+	circBACH1	BACH1	hsa-miR-489-3p	ENSG00000142102	PGGHG	0
chr18_56758865_56781656:+	circWDR7	WDR7	hsa-miR-103a-3p	ENSG00000142599	RERE	0
chr18_56758865_56781656:+	circWDR7	WDR7	hsa-miR-107	ENSG00000142599	RERE	0
chr18_56758865_56781656:+	circWDR7	WDR7	hsa-miR-128-3p	ENSG00000142599	RERE	0
chr18_56758865_56781656:+	circWDR7	WDR7	hsa-miR-135a-5p	ENSG00000142599	RERE	0
chr18_56758865_56781656:+	circWDR7	WDR7	hsa-miR-135b-5p	ENSG00000142599	RERE	0
chr18_56758865_56781656:+	circWDR7	WDR7	hsa-miR-148a-3p	ENSG00000142599	RERE	0
chr18_56758865_56781656:+	circWDR7	WDR7	hsa-miR-148b-3p	ENSG00000142599	RERE	0
chr18_56758865_56781656:+	circWDR7	WDR7	hsa-miR-152-3p	ENSG00000142599	RERE	0
chr1_84179177_84197824:+	circPRKACB	PRKACB	hsa-miR-200b-3p	ENSG00000142599	RERE	0
chr1_84179177_84197824:+	circPRKACB	PRKACB	hsa-miR-361-3p	ENSG00000142599	RERE	0
chr1_84179177_84197824:+	circPRKACB	PRKACB	hsa-miR-429	ENSG00000142599	RERE	0
chr6_98899268_98927822:-	circFBXL4	FBXL4	hsa-miR-105-5p	ENSG00000142611	PRDM16	0
chr6_98899268_98927822:-	circFBXL4	FBXL4	hsa-miR-182-5p	ENSG00000142611	PRDM16	0
chr6_98899268_98927822:-	circFBXL4	FBXL4	hsa-miR-199b-3p	ENSG00000142611	PRDM16	0
chr6_98899268_98927822:-	circFBXL4	FBXL4	hsa-miR-450b-5p	ENSG00000142611	PRDM16	0
chr6_98899268_98927822:-	circFBXL4	FBXL4	hsa-miR-105-5p	ENSG00000143028	SYPL2	0
chr6_98899268_98927822:-	circFBXL4	FBXL4	hsa-miR-149-5p	ENSG00000143028	SYPL2	0
chr6_98899268_98927822:-	circFBXL4	FBXL4	hsa-miR-450b-5p	ENSG00000143028	SYPL2	0
chr6_98899268_98927822:-	circFBXL4	FBXL4	hsa-miR-149-5p	ENSG00000143185	XCL2	0
chr1_77801331_77815231:+	circMIGA1	MIGA1	hsa-miR-26a-5p	ENSG00000143376	SNX27	0
chr1_77801331_77815231:+	circMIGA1	MIGA1	hsa-miR-26b-5p	ENSG00000143376	SNX27	0
chr1_77801331_77815231:+	circMIGA1	MIGA1	hsa-miR-432-5p	ENSG00000143376	SNX27	0
chr12_1263034_1290012:+	circERC1-1	ERC1	hsa-miR-29a-3p	ENSG00000143401	ANP32E	0
chr12_1263034_1290012:+	circERC1-1	ERC1	hsa-miR-29b-3p	ENSG00000143401	ANP32E	0
chr12_1263034_1290012:+	circERC1-1	ERC1	hsa-miR-29c-3p	ENSG00000143401	ANP32E	0
chr10_14896846_14897517:+	circSUV39H2	SUV39H2	hsa-miR-421	ENSG00000143436	MRPL9	0
chr6_98899268_98927822:-	circFBXL4	FBXL4	hsa-miR-142-3p	ENSG00000143842	SOX13	0
chr6_98899268_98927822:-	circFBXL4	FBXL4	hsa-miR-149-5p	ENSG00000143842	SOX13	0
chr6_98899268_98927822:-	circFBXL4	FBXL4	hsa-miR-182-5p	ENSG00000143842	SOX13	0
chr6_98899268_98927822:-	circFBXL4	FBXL4	hsa-miR-185-5p	ENSG00000143842	SOX13	0
chr6_98899268_98927822:-	circFBXL4	FBXL4	hsa-miR-628-5p	ENSG00000143842	SOX13	0
chr12_1263034_1290012:+	circERC1-1	ERC1	hsa-miR-133a-3p	ENSG00000143952	VPS54	0
chr12_1263034_1290012:+	circERC1-1	ERC1	hsa-miR-133b	ENSG00000143952	VPS54	0
chr12_1289852_1444750:+	circERC1-2	ERC1	hsa-miR-1301-3p	ENSG00000143995	MEIS1	0
chr12_1263034_1290012:+	circERC1-1	ERC1	hsa-miR-133a-3p	ENSG00000143995	MEIS1	0
chr12_1263034_1290012:+	circERC1-1	ERC1	hsa-miR-133b	ENSG00000143995	MEIS1	0
chr6_98899268_98927822:-	circFBXL4	FBXL4	hsa-miR-105-5p	ENSG00000144040	SFXN5	0
chr6_98899268_98927822:-	circFBXL4	FBXL4	hsa-miR-149-5p	ENSG00000144040	SFXN5	0
chr6_98899268_98927822:-	circFBXL4	FBXL4	hsa-miR-182-5p	ENSG00000144040	SFXN5	0
chr6_98899268_98927822:-	circFBXL4	FBXL4	hsa-miR-24-3p	ENSG00000144040	SFXN5	0
chr6_98899268_98927822:-	circFBXL4	FBXL4	hsa-miR-33a-5p	ENSG00000144040	SFXN5	0
chr6_98899268_98927822:-	circFBXL4	FBXL4	hsa-miR-33b-5p	ENSG00000144040	SFXN5	0
chr6_98899268_98927822:-	circFBXL4	FBXL4	hsa-miR-378a-3p	ENSG00000144040	SFXN5	0
chr6_98899268_98927822:-	circFBXL4	FBXL4	hsa-miR-378d	ENSG00000144040	SFXN5	0
chr6_98899268_98927822:-	circFBXL4	FBXL4	hsa-miR-489-3p	ENSG00000144040	SFXN5	0
chr6_98899268_98927822:-	circFBXL4	FBXL4	hsa-miR-499a-5p	ENSG00000144040	SFXN5	0
chr6_98899268_98927822:-	circFBXL4	FBXL4	hsa-miR-584-5p	ENSG00000144040	SFXN5	0
chr6_98899268_98927822:-	circFBXL4	FBXL4	hsa-miR-628-5p	ENSG00000144040	SFXN5	0
chr6_108854225_108876350:+	circARMC2	ARMC2	hsa-miR-143-3p	ENSG00000144043	TEX261	0
chr2_147896301_147899898:+	circACVR2A	ACVR2A	hsa-miR-486-5p	ENSG00000144357	UBR3	0
chr6_108854225_108876350:+	circARMC2	ARMC2	hsa-miR-143-3p	ENSG00000144674	GOLGA4	0
chr21_29321221_29329693:+	circBACH1	BACH1	hsa-miR-105-5p	ENSG00000144802	NFKBIZ	0
chr21_29321221_29329693:+	circBACH1	BACH1	hsa-miR-142-5p	ENSG00000144802	NFKBIZ	0
chr21_29321221_29329693:+	circBACH1	BACH1	hsa-miR-150-5p	ENSG00000144802	NFKBIZ	0
chr21_29321221_29329693:+	circBACH1	BACH1	hsa-miR-186-5p	ENSG00000144802	NFKBIZ	0
chr21_29321221_29329693:+	circBACH1	BACH1	hsa-miR-23a-3p	ENSG00000144802	NFKBIZ	0
chr21_29321221_29329693:+	circBACH1	BACH1	hsa-miR-23b-3p	ENSG00000144802	NFKBIZ	0
chr21_29321221_29329693:+	circBACH1	BACH1	hsa-miR-409-3p	ENSG00000144802	NFKBIZ	0
chr21_29321221_29329693:+	circBACH1	BACH1	hsa-miR-494-3p	ENSG00000144802	NFKBIZ	0
chr6_98899268_98927822:-	circFBXL4	FBXL4	hsa-miR-375	ENSG00000144820	ADGRG7	0
chr2_147896301_147899898:+	circACVR2A	ACVR2A	hsa-miR-486-5p	ENSG00000144959	NCEH1	1
chr2_147896301_147899898:+	circACVR2A	ACVR2A	hsa-miR-509-3p	ENSG00000144959	NCEH1	1
chr21_29321221_29329693:+	circBACH1	BACH1	hsa-miR-186-5p	ENSG00000145246	ATP10D	0
chr21_29321221_29329693:+	circBACH1	BACH1	hsa-miR-223-3p	ENSG00000145246	ATP10D	0
chr21_29321221_29329693:+	circBACH1	BACH1	hsa-miR-494-3p	ENSG00000145246	ATP10D	0
chr6_108854225_108876350:+	circARMC2	ARMC2	hsa-miR-143-3p	ENSG00000145348	TBCK	0
chr12_1263034_1290012:+	circERC1-1	ERC1	hsa-miR-29a-3p	ENSG00000145375	SPATA5	0
chr12_1263034_1290012:+	circERC1-1	ERC1	hsa-miR-29b-3p	ENSG00000145375	SPATA5	0
chr12_1263034_1290012:+	circERC1-1	ERC1	hsa-miR-29c-3p	ENSG00000145375	SPATA5	0
chr6_98899268_98927822:-	circFBXL4	FBXL4	hsa-miR-199b-3p	ENSG00000145555	MYO10	0
chr6_98899268_98927822:-	circFBXL4	FBXL4	hsa-miR-21-5p	ENSG00000145555	MYO10	0
chr1_77801331_77815231:+	circMIGA1	MIGA1	hsa-miR-26a-5p	ENSG00000145555	MYO10	0
chr1_77801331_77815231:+	circMIGA1	MIGA1	hsa-miR-26b-5p	ENSG00000145555	MYO10	0
chr6_98899268_98927822:-	circFBXL4	FBXL4	hsa-miR-33a-5p	ENSG00000145555	MYO10	0
chr6_98899268_98927822:-	circFBXL4	FBXL4	hsa-miR-33b-5p	ENSG00000145555	MYO10	0
chr6_98899268_98927822:-	circFBXL4	FBXL4	hsa-miR-374a-5p	ENSG00000145555	MYO10	0
chr6_98899268_98927822:-	circFBXL4	FBXL4	hsa-miR-374b-5p	ENSG00000145555	MYO10	0
chr6_98899268_98927822:-	circFBXL4	FBXL4	hsa-miR-375	ENSG00000145555	MYO10	0
chr6_98899268_98927822:-	circFBXL4	FBXL4	hsa-miR-3909	ENSG00000145555	MYO10	0
chr6_98899268_98927822:-	circFBXL4	FBXL4	hsa-miR-450b-5p	ENSG00000145555	MYO10	0
chr6_98899268_98927822:-	circFBXL4	FBXL4	hsa-miR-499a-5p	ENSG00000145555	MYO10	0
chr6_98899268_98927822:-	circFBXL4	FBXL4	hsa-miR-590-5p	ENSG00000145555	MYO10	0
chr6_98899268_98927822:-	circFBXL4	FBXL4	hsa-miR-628-5p	ENSG00000145555	MYO10	0
chr18_56758865_56781656:+	circWDR7	WDR7	hsa-miR-128-3p	ENSG00000145592	RPL37	0
chr6_108854225_108876350:+	circARMC2	ARMC2	hsa-miR-136-5p	ENSG00000145734	BDP1	0
chr6_108854225_108876350:+	circARMC2	ARMC2	hsa-miR-143-3p	ENSG00000145734	BDP1	0
chr6_108854225_108876350:+	circARMC2	ARMC2	hsa-miR-143-3p	ENSG00000145782	ATG12	0
chr6_108854225_108876350:+	circARMC2	ARMC2	hsa-miR-136-5p	ENSG00000145919	BOD1	0
chr2_147896301_147899898:+	circACVR2A	ACVR2A	hsa-miR-509-3p	ENSG00000145990	GFOD1	1
chr18_56758865_56781656:+	circWDR7	WDR7	hsa-miR-103a-3p	ENSG00000146072	TNFRSF21	0
chr18_56758865_56781656:+	circWDR7	WDR7	hsa-miR-107	ENSG00000146072	TNFRSF21	0
chr18_56758865_56781656:+	circWDR7	WDR7	hsa-miR-135a-5p	ENSG00000146072	TNFRSF21	0
chr18_56758865_56781656:+	circWDR7	WDR7	hsa-miR-135b-5p	ENSG00000146072	TNFRSF21	0
chr2_147896301_147899898:+	circACVR2A	ACVR2A	hsa-miR-509-3p	ENSG00000146072	TNFRSF21	1
chr21_29321221_29329693:+	circBACH1	BACH1	hsa-miR-494-3p	ENSG00000146143	PRIM2	0
chr21_29321221_29329693:+	circBACH1	BACH1	hsa-miR-625-5p	ENSG00000146143	PRIM2	0
chr12_1263034_1290012:+	circERC1-1	ERC1	hsa-miR-133b	ENSG00000146247	PHIP	0
chr21_29321221_29329693:+	circBACH1	BACH1	hsa-miR-103a-3p	ENSG00000146410	MTFR2	0
chr21_29321221_29329693:+	circBACH1	BACH1	hsa-miR-107	ENSG00000146410	MTFR2	0
chr21_29321221_29329693:+	circBACH1	BACH1	hsa-miR-15a-5p	ENSG00000146410	MTFR2	0
chr21_29321221_29329693:+	circBACH1	BACH1	hsa-miR-15b-5p	ENSG00000146410	MTFR2	0
chr21_29321221_29329693:+	circBACH1	BACH1	hsa-miR-16-5p	ENSG00000146410	MTFR2	0
chr21_29321221_29329693:+	circBACH1	BACH1	hsa-miR-186-5p	ENSG00000146410	MTFR2	0
chr21_29321221_29329693:+	circBACH1	BACH1	hsa-miR-195-5p	ENSG00000146410	MTFR2	0
chr21_29321221_29329693:+	circBACH1	BACH1	hsa-miR-214-3p	ENSG00000146410	MTFR2	0
chr21_29321221_29329693:+	circBACH1	BACH1	hsa-miR-374b-3p	ENSG00000146410	MTFR2	0
chr21_29321221_29329693:+	circBACH1	BACH1	hsa-miR-409-3p	ENSG00000146410	MTFR2	0
chr21_29321221_29329693:+	circBACH1	BACH1	hsa-miR-424-5p	ENSG00000146410	MTFR2	0
chr21_29321221_29329693:+	circBACH1	BACH1	hsa-miR-425-5p	ENSG00000146410	MTFR2	0
chr21_29321221_29329693:+	circBACH1	BACH1	hsa-miR-494-3p	ENSG00000146410	MTFR2	0
chr21_29321221_29329693:+	circBACH1	BACH1	hsa-miR-497-5p	ENSG00000146410	MTFR2	0
chr21_29321221_29329693:+	circBACH1	BACH1	hsa-miR-142-5p	ENSG00000146425	DYNLT1	0
chr21_29321221_29329693:+	circBACH1	BACH1	hsa-miR-150-5p	ENSG00000146425	DYNLT1	0
chr21_29321221_29329693:+	circBACH1	BACH1	hsa-miR-23a-3p	ENSG00000146425	DYNLT1	0
chr21_29321221_29329693:+	circBACH1	BACH1	hsa-miR-23b-3p	ENSG00000146425	DYNLT1	0
chr21_29321221_29329693:+	circBACH1	BACH1	hsa-miR-28-3p	ENSG00000146425	DYNLT1	0
chr1_243645893_243843282:-	circAKT3-2	AKT3	hsa-miR-199b-3p	ENSG00000147041	SYTL5	0
chr6_108854225_108876350:+	circARMC2	ARMC2	hsa-miR-136-5p	ENSG00000147475	ERLIN2	0
chr2_147896301_147899898:+	circACVR2A	ACVR2A	hsa-miR-486-5p	ENSG00000147650	LRP12	1
chr12_1263034_1290012:+	circERC1-1	ERC1	hsa-miR-29a-3p	ENSG00000147894	C9orf72	1
chr12_1263034_1290012:+	circERC1-1	ERC1	hsa-miR-29b-3p	ENSG00000147894	C9orf72	1
chr12_1263034_1290012:+	circERC1-1	ERC1	hsa-miR-29c-3p	ENSG00000147894	C9orf72	1
chr18_56758865_56781656:+	circWDR7	WDR7	hsa-miR-103a-3p	ENSG00000148158	SNX30	0
chr18_56758865_56781656:+	circWDR7	WDR7	hsa-miR-107	ENSG00000148158	SNX30	0
chr18_56758865_56781656:+	circWDR7	WDR7	hsa-miR-135a-5p	ENSG00000148158	SNX30	0
chr18_56758865_56781656:+	circWDR7	WDR7	hsa-miR-135b-5p	ENSG00000148158	SNX30	0
chr18_56758865_56781656:+	circWDR7	WDR7	hsa-miR-345-5p	ENSG00000148158	SNX30	0
chr2_147896301_147899898:+	circACVR2A	ACVR2A	hsa-miR-486-5p	ENSG00000148158	SNX30	1
chr6_98899268_98927822:-	circFBXL4	FBXL4	hsa-miR-199b-3p	ENSG00000148411	NACC2	0
chr6_98899268_98927822:-	circFBXL4	FBXL4	hsa-miR-489-3p	ENSG00000148411	NACC2	0
chr21_29321221_29329693:+	circBACH1	BACH1	hsa-miR-103a-3p	ENSG00000148429	USP6NL	0
chr21_29321221_29329693:+	circBACH1	BACH1	hsa-miR-105-5p	ENSG00000148429	USP6NL	0
chr21_29321221_29329693:+	circBACH1	BACH1	hsa-miR-107	ENSG00000148429	USP6NL	0
chr21_29321221_29329693:+	circBACH1	BACH1	hsa-miR-142-5p	ENSG00000148429	USP6NL	0
chr21_29321221_29329693:+	circBACH1	BACH1	hsa-miR-15a-5p	ENSG00000148429	USP6NL	0
chr21_29321221_29329693:+	circBACH1	BACH1	hsa-miR-15b-5p	ENSG00000148429	USP6NL	0
chr21_29321221_29329693:+	circBACH1	BACH1	hsa-miR-16-5p	ENSG00000148429	USP6NL	0
chr21_29321221_29329693:+	circBACH1	BACH1	hsa-miR-182-5p	ENSG00000148429	USP6NL	0
chr21_29321221_29329693:+	circBACH1	BACH1	hsa-miR-186-5p	ENSG00000148429	USP6NL	0
chr21_29321221_29329693:+	circBACH1	BACH1	hsa-miR-195-5p	ENSG00000148429	USP6NL	0
chr21_29321221_29329693:+	circBACH1	BACH1	hsa-miR-223-3p	ENSG00000148429	USP6NL	0
chr21_29321221_29329693:+	circBACH1	BACH1	hsa-miR-23a-3p	ENSG00000148429	USP6NL	0
chr21_29321221_29329693:+	circBACH1	BACH1	hsa-miR-23b-3p	ENSG00000148429	USP6NL	0
chr21_29321221_29329693:+	circBACH1	BACH1	hsa-miR-409-3p	ENSG00000148429	USP6NL	0
chr21_29321221_29329693:+	circBACH1	BACH1	hsa-miR-424-5p	ENSG00000148429	USP6NL	0
chr21_29321221_29329693:+	circBACH1	BACH1	hsa-miR-425-5p	ENSG00000148429	USP6NL	0
chr21_29321221_29329693:+	circBACH1	BACH1	hsa-miR-4677-3p	ENSG00000148429	USP6NL	0
chr21_29321221_29329693:+	circBACH1	BACH1	hsa-miR-489-3p	ENSG00000148429	USP6NL	0
chr21_29321221_29329693:+	circBACH1	BACH1	hsa-miR-494-3p	ENSG00000148429	USP6NL	0
chr21_29321221_29329693:+	circBACH1	BACH1	hsa-miR-497-5p	ENSG00000148429	USP6NL	0
chr6_98899268_98927822:-	circFBXL4	FBXL4	hsa-miR-105-5p	ENSG00000148672	GLUD1	0
chr6_98899268_98927822:-	circFBXL4	FBXL4	hsa-miR-182-5p	ENSG00000148672	GLUD1	0
chr6_98899268_98927822:-	circFBXL4	FBXL4	hsa-miR-185-5p	ENSG00000148672	GLUD1	0
chr6_98899268_98927822:-	circFBXL4	FBXL4	hsa-miR-33a-5p	ENSG00000148672	GLUD1	0
chr6_98899268_98927822:-	circFBXL4	FBXL4	hsa-miR-33b-5p	ENSG00000148672	GLUD1	0
chr6_98899268_98927822:-	circFBXL4	FBXL4	hsa-miR-378a-3p	ENSG00000148672	GLUD1	0
chr6_98899268_98927822:-	circFBXL4	FBXL4	hsa-miR-450b-5p	ENSG00000148672	GLUD1	0
chr6_98899268_98927822:-	circFBXL4	FBXL4	hsa-miR-489-3p	ENSG00000148672	GLUD1	0
chr6_98899268_98927822:-	circFBXL4	FBXL4	hsa-miR-628-5p	ENSG00000148672	GLUD1	0
chr6_98899268_98927822:-	circFBXL4	FBXL4	hsa-miR-149-5p	ENSG00000148700	ADD3	0
chr6_98899268_98927822:-	circFBXL4	FBXL4	hsa-miR-153-3p	ENSG00000148700	ADD3	0
chr6_98899268_98927822:-	circFBXL4	FBXL4	hsa-miR-182-5p	ENSG00000148700	ADD3	0
chr6_98899268_98927822:-	circFBXL4	FBXL4	hsa-miR-199b-3p	ENSG00000148700	ADD3	0
chr6_98899268_98927822:-	circFBXL4	FBXL4	hsa-miR-24-3p	ENSG00000148700	ADD3	0
chr6_98899268_98927822:-	circFBXL4	FBXL4	hsa-miR-33a-5p	ENSG00000148700	ADD3	0
chr6_98899268_98927822:-	circFBXL4	FBXL4	hsa-miR-33b-5p	ENSG00000148700	ADD3	0
chr6_98899268_98927822:-	circFBXL4	FBXL4	hsa-miR-374a-5p	ENSG00000148700	ADD3	0
chr6_98899268_98927822:-	circFBXL4	FBXL4	hsa-miR-374b-5p	ENSG00000148700	ADD3	0
chr6_98899268_98927822:-	circFBXL4	FBXL4	hsa-miR-3909	ENSG00000148700	ADD3	0
chr6_98899268_98927822:-	circFBXL4	FBXL4	hsa-miR-450b-5p	ENSG00000148700	ADD3	0
chr6_98899268_98927822:-	circFBXL4	FBXL4	hsa-miR-489-3p	ENSG00000148700	ADD3	0
chr6_98899268_98927822:-	circFBXL4	FBXL4	hsa-miR-584-5p	ENSG00000148700	ADD3	0
chr12_1263034_1290012:+	circERC1-1	ERC1	hsa-miR-133a-3p	ENSG00000148943	LIN7C	0
chr12_1263034_1290012:+	circERC1-1	ERC1	hsa-miR-133b	ENSG00000148943	LIN7C	0
chr6_98899268_98927822:-	circFBXL4	FBXL4	hsa-miR-105-5p	ENSG00000149485	FADS1	0
chr6_98899268_98927822:-	circFBXL4	FBXL4	hsa-miR-182-5p	ENSG00000149485	FADS1	0
chr6_98899268_98927822:-	circFBXL4	FBXL4	hsa-miR-185-5p	ENSG00000149485	FADS1	0
chr6_98899268_98927822:-	circFBXL4	FBXL4	hsa-miR-24-3p	ENSG00000149485	FADS1	0
chr6_98899268_98927822:-	circFBXL4	FBXL4	hsa-miR-374a-5p	ENSG00000149485	FADS1	0
chr6_98899268_98927822:-	circFBXL4	FBXL4	hsa-miR-374b-5p	ENSG00000149485	FADS1	0
chr6_98899268_98927822:-	circFBXL4	FBXL4	hsa-miR-375	ENSG00000149485	FADS1	0
chr6_98899268_98927822:-	circFBXL4	FBXL4	hsa-miR-378a-3p	ENSG00000149485	FADS1	0
chr6_98899268_98927822:-	circFBXL4	FBXL4	hsa-miR-450b-5p	ENSG00000149485	FADS1	0
chr6_98899268_98927822:-	circFBXL4	FBXL4	hsa-miR-628-5p	ENSG00000149485	FADS1	0
chr12_1263034_1290012:+	circERC1-1	ERC1	hsa-miR-133a-3p	ENSG00000149639	SOGA1	0
chr12_1263034_1290012:+	circERC1-1	ERC1	hsa-miR-133b	ENSG00000149639	SOGA1	0
chr12_1263034_1290012:+	circERC1-1	ERC1	hsa-miR-29a-3p	ENSG00000149639	SOGA1	0
chr12_1263034_1290012:+	circERC1-1	ERC1	hsa-miR-29b-3p	ENSG00000149639	SOGA1	0
chr12_1263034_1290012:+	circERC1-1	ERC1	hsa-miR-29c-3p	ENSG00000149639	SOGA1	0
chr6_98899268_98927822:-	circFBXL4	FBXL4	hsa-miR-105-5p	ENSG00000149948	HMGA2	0
chr6_98899268_98927822:-	circFBXL4	FBXL4	hsa-miR-142-3p	ENSG00000149948	HMGA2	0
chr6_98899268_98927822:-	circFBXL4	FBXL4	hsa-miR-149-5p	ENSG00000149948	HMGA2	0
chr6_98899268_98927822:-	circFBXL4	FBXL4	hsa-miR-182-5p	ENSG00000149948	HMGA2	0
chr6_98899268_98927822:-	circFBXL4	FBXL4	hsa-miR-185-5p	ENSG00000149948	HMGA2	0
chr6_98899268_98927822:-	circFBXL4	FBXL4	hsa-miR-33a-5p	ENSG00000149948	HMGA2	0
chr6_98899268_98927822:-	circFBXL4	FBXL4	hsa-miR-33b-5p	ENSG00000149948	HMGA2	0
chr6_98899268_98927822:-	circFBXL4	FBXL4	hsa-miR-450b-5p	ENSG00000149948	HMGA2	0
chr6_98899268_98927822:-	circFBXL4	FBXL4	hsa-miR-628-5p	ENSG00000149948	HMGA2	0
chr6_98899268_98927822:-	circFBXL4	FBXL4	hsa-miR-185-5p	ENSG00000150281	CTF1	0
chr2_147896301_147899898:+	circACVR2A	ACVR2A	hsa-miR-486-5p	ENSG00000150907	FOXO1	1
chr2_147896301_147899898:+	circACVR2A	ACVR2A	hsa-miR-509-3p	ENSG00000151150	ANK3	1
chr18_56758865_56781656:+	circWDR7	WDR7	hsa-miR-103a-3p	ENSG00000151292	CSNK1G3	0
chr18_56758865_56781656:+	circWDR7	WDR7	hsa-miR-107	ENSG00000151292	CSNK1G3	0
chr18_56758865_56781656:+	circWDR7	WDR7	hsa-miR-135a-5p	ENSG00000151292	CSNK1G3	0
chr18_56758865_56781656:+	circWDR7	WDR7	hsa-miR-135b-5p	ENSG00000151292	CSNK1G3	0
chr12_1263034_1290012:+	circERC1-1	ERC1	hsa-miR-29a-3p	ENSG00000151364	KCTD14	0
chr12_1263034_1290012:+	circERC1-1	ERC1	hsa-miR-29b-3p	ENSG00000151364	KCTD14	0
chr12_1263034_1290012:+	circERC1-1	ERC1	hsa-miR-29c-3p	ENSG00000151364	KCTD14	0
chr21_29321221_29329693:+	circBACH1	BACH1	hsa-miR-141-3p	ENSG00000151466	SCLT1	0
chr21_29321221_29329693:+	circBACH1	BACH1	hsa-miR-182-5p	ENSG00000151466	SCLT1	0
chr21_29321221_29329693:+	circBACH1	BACH1	hsa-miR-186-5p	ENSG00000151466	SCLT1	0
chr21_29321221_29329693:+	circBACH1	BACH1	hsa-miR-200a-3p	ENSG00000151466	SCLT1	0
chr2_147896301_147899898:+	circACVR2A	ACVR2A	hsa-miR-486-5p	ENSG00000151498	ACAD8	0
chr2_147896301_147899898:+	circACVR2A	ACVR2A	hsa-miR-486-5p	ENSG00000151553	FAM160B1	0
chr18_56758865_56781656:+	circWDR7	WDR7	hsa-miR-103a-3p	ENSG00000151715	TMEM45B	0
chr18_56758865_56781656:+	circWDR7	WDR7	hsa-miR-107	ENSG00000151715	TMEM45B	0
chr12_1263034_1290012:+	circERC1-1	ERC1	hsa-miR-133a-3p	ENSG00000151746	BICD1	0
chr12_1263034_1290012:+	circERC1-1	ERC1	hsa-miR-133b	ENSG00000151746	BICD1	0
chr12_1263034_1290012:+	circERC1-1	ERC1	hsa-miR-29a-3p	ENSG00000151746	BICD1	0
chr12_1263034_1290012:+	circERC1-1	ERC1	hsa-miR-29b-3p	ENSG00000151746	BICD1	0
chr12_1263034_1290012:+	circERC1-1	ERC1	hsa-miR-29c-3p	ENSG00000151746	BICD1	0
chr6_98899268_98927822:-	circFBXL4	FBXL4	hsa-miR-105-5p	ENSG00000152192	POU4F1	0
chr6_98899268_98927822:-	circFBXL4	FBXL4	hsa-miR-142-3p	ENSG00000152192	POU4F1	0
chr6_98899268_98927822:-	circFBXL4	FBXL4	hsa-miR-185-5p	ENSG00000152192	POU4F1	0
chr6_98899268_98927822:-	circFBXL4	FBXL4	hsa-miR-21-5p	ENSG00000152192	POU4F1	0
chr6_98899268_98927822:-	circFBXL4	FBXL4	hsa-miR-33a-5p	ENSG00000152192	POU4F1	0
chr6_98899268_98927822:-	circFBXL4	FBXL4	hsa-miR-33b-5p	ENSG00000152192	POU4F1	0
chr6_98899268_98927822:-	circFBXL4	FBXL4	hsa-miR-3909	ENSG00000152192	POU4F1	0
chr6_98899268_98927822:-	circFBXL4	FBXL4	hsa-miR-590-5p	ENSG00000152192	POU4F1	0
chr6_98899268_98927822:-	circFBXL4	FBXL4	hsa-miR-182-5p	ENSG00000152284	TCF7L1	0
chr6_108854225_108876350:+	circARMC2	ARMC2	hsa-miR-136-5p	ENSG00000152443	ZNF776	0
chr6_108854225_108876350:+	circARMC2	ARMC2	hsa-miR-143-3p	ENSG00000152443	ZNF776	0
chr12_1263034_1290012:+	circERC1-1	ERC1	hsa-miR-29a-3p	ENSG00000152495	CAMK4	0
chr12_1263034_1290012:+	circERC1-1	ERC1	hsa-miR-29b-3p	ENSG00000152495	CAMK4	0
chr12_1263034_1290012:+	circERC1-1	ERC1	hsa-miR-29c-3p	ENSG00000152495	CAMK4	0
chr2_147896301_147899898:+	circACVR2A	ACVR2A	hsa-miR-486-5p	ENSG00000152503	TRIM36	0
chr12_1263034_1290012:+	circERC1-1	ERC1	hsa-miR-133a-3p	ENSG00000152520	PAN3	0
chr12_1263034_1290012:+	circERC1-1	ERC1	hsa-miR-133b	ENSG00000152520	PAN3	0
chr12_1263034_1290012:+	circERC1-1	ERC1	hsa-miR-29a-3p	ENSG00000152520	PAN3	0
chr12_1263034_1290012:+	circERC1-1	ERC1	hsa-miR-29b-3p	ENSG00000152520	PAN3	0
chr12_1263034_1290012:+	circERC1-1	ERC1	hsa-miR-29c-3p	ENSG00000152520	PAN3	0
chr12_1289852_1444750:+	circERC1-2	ERC1	hsa-miR-138-5p	ENSG00000152782	PANK1	0
chr12_1263034_1290012:+	circERC1-1	ERC1	hsa-miR-29a-3p	ENSG00000152782	PANK1	0
chr12_1263034_1290012:+	circERC1-1	ERC1	hsa-miR-29b-3p	ENSG00000152782	PANK1	0
chr12_1263034_1290012:+	circERC1-1	ERC1	hsa-miR-29c-3p	ENSG00000152782	PANK1	0
chr21_29321221_29329693:+	circBACH1	BACH1	hsa-miR-103a-3p	ENSG00000152818	UTRN	0
chr21_29321221_29329693:+	circBACH1	BACH1	hsa-miR-107	ENSG00000152818	UTRN	0
chr21_29321221_29329693:+	circBACH1	BACH1	hsa-miR-141-3p	ENSG00000152818	UTRN	0
chr21_29321221_29329693:+	circBACH1	BACH1	hsa-miR-142-5p	ENSG00000152818	UTRN	0
chr21_29321221_29329693:+	circBACH1	BACH1	hsa-miR-15a-5p	ENSG00000152818	UTRN	0
chr21_29321221_29329693:+	circBACH1	BACH1	hsa-miR-15b-5p	ENSG00000152818	UTRN	0
chr21_29321221_29329693:+	circBACH1	BACH1	hsa-miR-16-5p	ENSG00000152818	UTRN	0
chr21_29321221_29329693:+	circBACH1	BACH1	hsa-miR-182-5p	ENSG00000152818	UTRN	0
chr21_29321221_29329693:+	circBACH1	BACH1	hsa-miR-186-5p	ENSG00000152818	UTRN	0
chr21_29321221_29329693:+	circBACH1	BACH1	hsa-miR-195-5p	ENSG00000152818	UTRN	0
chr21_29321221_29329693:+	circBACH1	BACH1	hsa-miR-200a-3p	ENSG00000152818	UTRN	0
chr21_29321221_29329693:+	circBACH1	BACH1	hsa-miR-214-3p	ENSG00000152818	UTRN	0
chr21_29321221_29329693:+	circBACH1	BACH1	hsa-miR-219a-2-3p	ENSG00000152818	UTRN	0
chr21_29321221_29329693:+	circBACH1	BACH1	hsa-miR-223-3p	ENSG00000152818	UTRN	0
chr21_29321221_29329693:+	circBACH1	BACH1	hsa-miR-424-5p	ENSG00000152818	UTRN	0
chr21_29321221_29329693:+	circBACH1	BACH1	hsa-miR-425-5p	ENSG00000152818	UTRN	0
chr21_29321221_29329693:+	circBACH1	BACH1	hsa-miR-4677-3p	ENSG00000152818	UTRN	0
chr21_29321221_29329693:+	circBACH1	BACH1	hsa-miR-489-3p	ENSG00000152818	UTRN	0
chr21_29321221_29329693:+	circBACH1	BACH1	hsa-miR-494-3p	ENSG00000152818	UTRN	0
chr21_29321221_29329693:+	circBACH1	BACH1	hsa-miR-497-5p	ENSG00000152818	UTRN	0
chr6_108854225_108876350:+	circARMC2	ARMC2	hsa-miR-143-3p	ENSG00000152944	MED21	0
chr21_29321221_29329693:+	circBACH1	BACH1	hsa-miR-142-5p	ENSG00000153071	DAB2	0
chr21_29321221_29329693:+	circBACH1	BACH1	hsa-miR-150-5p	ENSG00000153071	DAB2	0
chr21_29321221_29329693:+	circBACH1	BACH1	hsa-miR-182-5p	ENSG00000153071	DAB2	0
chr21_29321221_29329693:+	circBACH1	BACH1	hsa-miR-23a-3p	ENSG00000153071	DAB2	0
chr21_29321221_29329693:+	circBACH1	BACH1	hsa-miR-23b-3p	ENSG00000153071	DAB2	0
chr21_29321221_29329693:+	circBACH1	BACH1	hsa-miR-4677-3p	ENSG00000153071	DAB2	0
chr21_29321221_29329693:+	circBACH1	BACH1	hsa-miR-494-3p	ENSG00000153071	DAB2	0
chr12_1263034_1290012:+	circERC1-1	ERC1	hsa-miR-133a-3p	ENSG00000153561	RMND5A	0
chr12_1263034_1290012:+	circERC1-1	ERC1	hsa-miR-133b	ENSG00000153561	RMND5A	0
chr12_1263034_1290012:+	circERC1-1	ERC1	hsa-miR-29a-3p	ENSG00000153561	RMND5A	0
chr12_1263034_1290012:+	circERC1-1	ERC1	hsa-miR-29b-3p	ENSG00000153561	RMND5A	0
chr12_1263034_1290012:+	circERC1-1	ERC1	hsa-miR-29c-3p	ENSG00000153561	RMND5A	0
chr6_108854225_108876350:+	circARMC2	ARMC2	hsa-miR-143-3p	ENSG00000153879	CEBPG	0
chr6_18236452_18258405:-	circDEK	DEK	hsa-miR-1271-5p	ENSG00000153914	SREK1	0
chr6_18236452_18258405:-	circDEK	DEK	hsa-miR-129-5p	ENSG00000153914	SREK1	0
chr6_18236452_18258405:-	circDEK	DEK	hsa-miR-193a-3p	ENSG00000153914	SREK1	0
chr6_18236452_18258405:-	circDEK	DEK	hsa-miR-193b-3p	ENSG00000153914	SREK1	0
chr6_18236452_18258405:-	circDEK	DEK	hsa-miR-28-3p	ENSG00000153914	SREK1	0
chr6_18236452_18258405:-	circDEK	DEK	hsa-miR-33a-5p	ENSG00000153914	SREK1	0
chr6_18236452_18258405:-	circDEK	DEK	hsa-miR-33b-5p	ENSG00000153914	SREK1	0
chr6_18236452_18258405:-	circDEK	DEK	hsa-miR-450b-5p	ENSG00000153914	SREK1	0
chr6_18236452_18258405:-	circDEK	DEK	hsa-miR-452-5p	ENSG00000153914	SREK1	0
chr6_98899268_98927822:-	circFBXL4	FBXL4	hsa-miR-105-5p	ENSG00000153944	MSI2	0
chr6_98899268_98927822:-	circFBXL4	FBXL4	hsa-miR-142-3p	ENSG00000153944	MSI2	0
chr6_98899268_98927822:-	circFBXL4	FBXL4	hsa-miR-149-5p	ENSG00000153944	MSI2	0
chr6_98899268_98927822:-	circFBXL4	FBXL4	hsa-miR-153-3p	ENSG00000153944	MSI2	0
chr6_98899268_98927822:-	circFBXL4	FBXL4	hsa-miR-185-5p	ENSG00000153944	MSI2	0
chr6_98899268_98927822:-	circFBXL4	FBXL4	hsa-miR-199b-3p	ENSG00000153944	MSI2	0
chr6_98899268_98927822:-	circFBXL4	FBXL4	hsa-miR-374a-5p	ENSG00000153944	MSI2	0
chr6_98899268_98927822:-	circFBXL4	FBXL4	hsa-miR-374b-5p	ENSG00000153944	MSI2	0
chr6_98899268_98927822:-	circFBXL4	FBXL4	hsa-miR-378a-3p	ENSG00000153944	MSI2	0
chr6_98899268_98927822:-	circFBXL4	FBXL4	hsa-miR-378d	ENSG00000153944	MSI2	0
chr6_98899268_98927822:-	circFBXL4	FBXL4	hsa-miR-489-3p	ENSG00000153944	MSI2	0
chr6_98899268_98927822:-	circFBXL4	FBXL4	hsa-miR-499a-5p	ENSG00000153944	MSI2	0
chr6_98899268_98927822:-	circFBXL4	FBXL4	hsa-miR-584-5p	ENSG00000153944	MSI2	0
chr6_98899268_98927822:-	circFBXL4	FBXL4	hsa-miR-374a-5p	ENSG00000154102	C16orf74	0
chr6_98899268_98927822:-	circFBXL4	FBXL4	hsa-miR-374b-5p	ENSG00000154102	C16orf74	0
chr1_84179177_84197824:+	circPRKACB	PRKACB	hsa-miR-200b-3p	ENSG00000154114	TBCEL	0
chr1_84179177_84197824:+	circPRKACB	PRKACB	hsa-miR-429	ENSG00000154114	TBCEL	0
chr6_98899268_98927822:-	circFBXL4	FBXL4	hsa-miR-149-5p	ENSG00000154319	FAM167A	0
chr6_98899268_98927822:-	circFBXL4	FBXL4	hsa-miR-182-5p	ENSG00000154319	FAM167A	0
chr6_98899268_98927822:-	circFBXL4	FBXL4	hsa-miR-185-5p	ENSG00000154319	FAM167A	0
chr6_98899268_98927822:-	circFBXL4	FBXL4	hsa-miR-199b-3p	ENSG00000154319	FAM167A	0
chr6_98899268_98927822:-	circFBXL4	FBXL4	hsa-miR-24-3p	ENSG00000154319	FAM167A	0
chr6_98899268_98927822:-	circFBXL4	FBXL4	hsa-miR-33a-5p	ENSG00000154319	FAM167A	0
chr6_98899268_98927822:-	circFBXL4	FBXL4	hsa-miR-33b-5p	ENSG00000154319	FAM167A	0
chr6_98899268_98927822:-	circFBXL4	FBXL4	hsa-miR-450b-5p	ENSG00000154319	FAM167A	0
chr6_98899268_98927822:-	circFBXL4	FBXL4	hsa-miR-489-3p	ENSG00000154319	FAM167A	0
chr6_98899268_98927822:-	circFBXL4	FBXL4	hsa-miR-584-5p	ENSG00000154319	FAM167A	0
chr6_98899268_98927822:-	circFBXL4	FBXL4	hsa-miR-628-5p	ENSG00000154319	FAM167A	0
chr18_56758865_56781656:+	circWDR7	WDR7	hsa-miR-103a-3p	ENSG00000154342	WNT3A	0
chr18_56758865_56781656:+	circWDR7	WDR7	hsa-miR-107	ENSG00000154342	WNT3A	0
chr12_1263034_1290012:+	circERC1-1	ERC1	hsa-miR-133a-3p	ENSG00000154736	ADAMTS5	0
chr12_1263034_1290012:+	circERC1-1	ERC1	hsa-miR-133b	ENSG00000154736	ADAMTS5	0
chr12_1289852_1444750:+	circERC1-2	ERC1	hsa-miR-138-5p	ENSG00000154736	ADAMTS5	0
chr12_1289852_1444750:+	circERC1-2	ERC1	hsa-miR-150-5p	ENSG00000154736	ADAMTS5	0
chr6_108854225_108876350:+	circARMC2	ARMC2	hsa-miR-143-3p	ENSG00000154814	OXNAD1	0
chr12_1263034_1290012:+	circERC1-1	ERC1	hsa-miR-133a-3p	ENSG00000154822	PLCL2	1
chr12_1263034_1290012:+	circERC1-1	ERC1	hsa-miR-133b	ENSG00000154822	PLCL2	1
chr1_77801331_77815231:+	circMIGA1	MIGA1	hsa-miR-26a-5p	ENSG00000154856	APCDD1	0
chr1_77801331_77815231:+	circMIGA1	MIGA1	hsa-miR-26b-5p	ENSG00000154856	APCDD1	0
chr6_98899268_98927822:-	circFBXL4	FBXL4	hsa-miR-33a-5p	ENSG00000154856	APCDD1	0
chr6_98899268_98927822:-	circFBXL4	FBXL4	hsa-miR-33b-5p	ENSG00000154856	APCDD1	0
chr1_84179177_84197824:+	circPRKACB	PRKACB	hsa-miR-369-3p	ENSG00000154856	APCDD1	0
chr6_98899268_98927822:-	circFBXL4	FBXL4	hsa-miR-374a-5p	ENSG00000154856	APCDD1	0
chr6_98899268_98927822:-	circFBXL4	FBXL4	hsa-miR-374b-5p	ENSG00000154856	APCDD1	0
chr6_98899268_98927822:-	circFBXL4	FBXL4	hsa-miR-378a-3p	ENSG00000154856	APCDD1	0
chr2_147896301_147899898:+	circACVR2A	ACVR2A	hsa-miR-486-5p	ENSG00000155096	AZIN1	0
chr2_147896301_147899898:+	circACVR2A	ACVR2A	hsa-miR-509-3p	ENSG00000155096	AZIN1	0
chr6_98899268_98927822:-	circFBXL4	FBXL4	hsa-miR-185-5p	ENSG00000155495	MAGEC1	0
chr12_1263034_1290012:+	circERC1-1	ERC1	hsa-miR-133a-3p	ENSG00000155545	MIER3	0
chr12_1263034_1290012:+	circERC1-1	ERC1	hsa-miR-133b	ENSG00000155545	MIER3	0
chr12_1263034_1290012:+	circERC1-1	ERC1	hsa-miR-29a-3p	ENSG00000155545	MIER3	0
chr12_1263034_1290012:+	circERC1-1	ERC1	hsa-miR-29b-3p	ENSG00000155545	MIER3	0
chr12_1263034_1290012:+	circERC1-1	ERC1	hsa-miR-29c-3p	ENSG00000155545	MIER3	0
chr12_1263034_1290012:+	circERC1-1	ERC1	hsa-miR-133a-3p	ENSG00000155561	NUP205	0
chr12_1263034_1290012:+	circERC1-1	ERC1	hsa-miR-133b	ENSG00000155561	NUP205	0
chr12_1289852_1444750:+	circERC1-2	ERC1	hsa-miR-138-5p	ENSG00000155760	FZD7	0
chr12_1289852_1444750:+	circERC1-2	ERC1	hsa-miR-150-5p	ENSG00000155760	FZD7	0
chr2_147896301_147899898:+	circACVR2A	ACVR2A	hsa-miR-486-5p	ENSG00000155974	GRIP1	0
chr12_1289852_1444750:+	circERC1-2	ERC1	hsa-miR-150-5p	ENSG00000156026	MCU	0
chr12_1263034_1290012:+	circERC1-1	ERC1	hsa-miR-29a-3p	ENSG00000156026	MCU	0
chr12_1263034_1290012:+	circERC1-1	ERC1	hsa-miR-29b-3p	ENSG00000156026	MCU	0
chr12_1263034_1290012:+	circERC1-1	ERC1	hsa-miR-29c-3p	ENSG00000156026	MCU	0
chr12_1263034_1290012:+	circERC1-1	ERC1	hsa-miR-29a-3p	ENSG00000156299	TIAM1	0
chr12_1263034_1290012:+	circERC1-1	ERC1	hsa-miR-29b-3p	ENSG00000156299	TIAM1	0
chr12_1263034_1290012:+	circERC1-1	ERC1	hsa-miR-29c-3p	ENSG00000156299	TIAM1	0
chr6_108854225_108876350:+	circARMC2	ARMC2	hsa-miR-143-3p	ENSG00000156531	PHF6	0
chr12_1289852_1444750:+	circERC1-2	ERC1	hsa-miR-1301-3p	ENSG00000156787	TBC1D31	0
chr12_1289852_1444750:+	circERC1-2	ERC1	hsa-miR-150-5p	ENSG00000156787	TBC1D31	0
chr18_76849526_76881512:+	circZNF236	ZNF236	hsa-miR-181a-5p	ENSG00000156787	TBC1D31	0
chr18_76849526_76881512:+	circZNF236	ZNF236	hsa-miR-181b-5p	ENSG00000156787	TBC1D31	0
chr18_76849526_76881512:+	circZNF236	ZNF236	hsa-miR-181c-5p	ENSG00000156787	TBC1D31	0
chr18_76849526_76881512:+	circZNF236	ZNF236	hsa-miR-181d-5p	ENSG00000156787	TBC1D31	0
chr18_76849526_76881512:+	circZNF236	ZNF236	hsa-miR-218-5p	ENSG00000156787	TBC1D31	0
chr18_76849526_76881512:+	circZNF236	ZNF236	hsa-miR-22-3p	ENSG00000156787	TBC1D31	0
chr18_76849526_76881512:+	circZNF236	ZNF236	hsa-miR-23a-3p	ENSG00000156787	TBC1D31	0
chr18_76849526_76881512:+	circZNF236	ZNF236	hsa-miR-23b-3p	ENSG00000156787	TBC1D31	0
chr18_76849526_76881512:+	circZNF236	ZNF236	hsa-miR-299-3p	ENSG00000156787	TBC1D31	0
chr12_1263034_1290012:+	circERC1-1	ERC1	hsa-miR-29a-3p	ENSG00000156787	TBC1D31	0
chr12_1263034_1290012:+	circERC1-1	ERC1	hsa-miR-29b-3p	ENSG00000156787	TBC1D31	0
chr12_1263034_1290012:+	circERC1-1	ERC1	hsa-miR-29c-3p	ENSG00000156787	TBC1D31	0
chr3_183650296_183672484:+	circKLHL24	KLHL24	hsa-miR-1287-5p	ENSG00000157326	DHRS4	0
chr3_183650296_183672484:+	circKLHL24	KLHL24	hsa-miR-144-3p	ENSG00000157326	DHRS4	0
chr2_147896301_147899898:+	circACVR2A	ACVR2A	hsa-miR-486-5p	ENSG00000157554	ERG	0
chr12_1289852_1444750:+	circERC1-2	ERC1	hsa-miR-1301-3p	ENSG00000157570	TSPAN18	0
chr12_1263034_1290012:+	circERC1-1	ERC1	hsa-miR-133a-3p	ENSG00000157570	TSPAN18	0
chr12_1263034_1290012:+	circERC1-1	ERC1	hsa-miR-133b	ENSG00000157570	TSPAN18	0
chr18_56758865_56781656:+	circWDR7	WDR7	hsa-miR-103a-3p	ENSG00000157625	TAB3	0
chr18_56758865_56781656:+	circWDR7	WDR7	hsa-miR-107	ENSG00000157625	TAB3	0
chr18_56758865_56781656:+	circWDR7	WDR7	hsa-miR-128-3p	ENSG00000157625	TAB3	0
chr18_56758865_56781656:+	circWDR7	WDR7	hsa-miR-135a-5p	ENSG00000157625	TAB3	0
chr18_56758865_56781656:+	circWDR7	WDR7	hsa-miR-135b-5p	ENSG00000157625	TAB3	0
chr18_56758865_56781656:+	circWDR7	WDR7	hsa-miR-148a-3p	ENSG00000157625	TAB3	0
chr18_56758865_56781656:+	circWDR7	WDR7	hsa-miR-148b-3p	ENSG00000157625	TAB3	0
chr18_56758865_56781656:+	circWDR7	WDR7	hsa-miR-152-3p	ENSG00000157625	TAB3	0
chr18_56758865_56781656:+	circWDR7	WDR7	hsa-miR-153-3p	ENSG00000157625	TAB3	0
chr18_56758865_56781656:+	circWDR7	WDR7	hsa-miR-345-5p	ENSG00000157625	TAB3	0
chr12_1263034_1290012:+	circERC1-1	ERC1	hsa-miR-133a-3p	ENSG00000157657	ZNF618	0
chr12_1263034_1290012:+	circERC1-1	ERC1	hsa-miR-133b	ENSG00000157657	ZNF618	0
chr12_1263034_1290012:+	circERC1-1	ERC1	hsa-miR-29a-3p	ENSG00000157657	ZNF618	0
chr12_1263034_1290012:+	circERC1-1	ERC1	hsa-miR-29b-3p	ENSG00000157657	ZNF618	0
chr12_1263034_1290012:+	circERC1-1	ERC1	hsa-miR-29c-3p	ENSG00000157657	ZNF618	0
chr6_108854225_108876350:+	circARMC2	ARMC2	hsa-miR-143-3p	ENSG00000157741	UBN2	0
chr6_98899268_98927822:-	circFBXL4	FBXL4	hsa-miR-105-5p	ENSG00000157833	GAREM2	0
chr18_76849526_76881512:+	circZNF236	ZNF236	hsa-miR-124-3p	ENSG00000157933	SKI	0
chr18_76849526_76881512:+	circZNF236	ZNF236	hsa-miR-1286	ENSG00000157933	SKI	0
chr18_76849526_76881512:+	circZNF236	ZNF236	hsa-miR-204-5p	ENSG00000157933	SKI	0
chr18_76849526_76881512:+	circZNF236	ZNF236	hsa-miR-211-5p	ENSG00000157933	SKI	0
chr18_76849526_76881512:+	circZNF236	ZNF236	hsa-miR-218-5p	ENSG00000157933	SKI	0
chr18_76849526_76881512:+	circZNF236	ZNF236	hsa-miR-22-3p	ENSG00000157933	SKI	0
chr12_1263034_1290012:+	circERC1-1	ERC1	hsa-miR-29a-3p	ENSG00000157933	SKI	0
chr12_1263034_1290012:+	circERC1-1	ERC1	hsa-miR-29b-3p	ENSG00000157933	SKI	0
chr12_1263034_1290012:+	circERC1-1	ERC1	hsa-miR-29c-3p	ENSG00000157933	SKI	0
chr18_76849526_76881512:+	circZNF236	ZNF236	hsa-miR-411-5p	ENSG00000157933	SKI	0
chr12_1263034_1290012:+	circERC1-1	ERC1	hsa-miR-133a-3p	ENSG00000157978	LDLRAP1	0
chr12_1263034_1290012:+	circERC1-1	ERC1	hsa-miR-133b	ENSG00000157978	LDLRAP1	0
chr12_1263034_1290012:+	circERC1-1	ERC1	hsa-miR-29a-3p	ENSG00000157978	LDLRAP1	0
chr12_1263034_1290012:+	circERC1-1	ERC1	hsa-miR-29b-3p	ENSG00000157978	LDLRAP1	0
chr12_1263034_1290012:+	circERC1-1	ERC1	hsa-miR-29c-3p	ENSG00000157978	LDLRAP1	0
chr12_1263034_1290012:+	circERC1-1	ERC1	hsa-miR-29a-3p	ENSG00000158156	XKR8	0
chr12_1263034_1290012:+	circERC1-1	ERC1	hsa-miR-29b-3p	ENSG00000158156	XKR8	0
chr12_1263034_1290012:+	circERC1-1	ERC1	hsa-miR-29c-3p	ENSG00000158156	XKR8	0
chr18_76849526_76881512:+	circZNF236	ZNF236	hsa-miR-299-3p	ENSG00000158163	DZIP1L	0
chr18_76849526_76881512:+	circZNF236	ZNF236	hsa-miR-124-3p	ENSG00000158169	FANCC	0
chr18_76849526_76881512:+	circZNF236	ZNF236	hsa-miR-1286	ENSG00000158169	FANCC	0
chr18_76849526_76881512:+	circZNF236	ZNF236	hsa-miR-218-5p	ENSG00000158169	FANCC	0
chr18_76849526_76881512:+	circZNF236	ZNF236	hsa-miR-22-3p	ENSG00000158169	FANCC	0
chr12_1263034_1290012:+	circERC1-1	ERC1	hsa-miR-29a-3p	ENSG00000158169	FANCC	0
[truncated: 1,143 more rows]

## Sheet: circQTL-circRNA-miRNA-gene
circQTL		circRNA				trans-eGene
SNP_locus	circQTL SNP_ID	circRNA ID	circRNA name	Host gene symbol	miRNA	trans-eGene	Gene symbol	Overlapping with 257 circRNA-trans-eGene pairs that were causally connected with ASD diagnosis (1: yes; 0: no)
chr1-244023952	rs1353196	chr1_243645893_243843282:-	circAKT3-2	AKT3	hsa-miR-199b-3p	ENSG00000011201	ANOS1	0
chr1-244023952	rs1353196	chr1_243645893_243843282:-	circAKT3-2	AKT3	hsa-miR-432-5p	ENSG00000011201	ANOS1	0
chr1-244025924	rs78680111	chr1_243645893_243843282:-	circAKT3-2	AKT3	hsa-miR-199b-3p	ENSG00000011201	ANOS1	0
chr1-244025924	rs78680111	chr1_243645893_243843282:-	circAKT3-2	AKT3	hsa-miR-432-5p	ENSG00000011201	ANOS1	0
chr1-244035197	rs10927113	chr1_243645893_243843282:-	circAKT3-2	AKT3	hsa-miR-199b-3p	ENSG00000011201	ANOS1	0
chr1-244035197	rs10927113	chr1_243645893_243843282:-	circAKT3-2	AKT3	hsa-miR-432-5p	ENSG00000011201	ANOS1	0
chr1-244023952	rs1353196	chr1_243645893_243843282:-	circAKT3-2	AKT3	hsa-miR-199b-3p	ENSG00000147041	SYTL5	0
chr1-244025924	rs78680111	chr1_243645893_243843282:-	circAKT3-2	AKT3	hsa-miR-199b-3p	ENSG00000147041	SYTL5	0
chr1-244035197	rs10927113	chr1_243645893_243843282:-	circAKT3-2	AKT3	hsa-miR-199b-3p	ENSG00000147041	SYTL5	0
chr1-244023952	rs1353196	chr1_243645893_243843282:-	circAKT3-2	AKT3	hsa-miR-337-3p	ENSG00000164323	CFAP97	0
chr1-244023952	rs1353196	chr1_243645893_243843282:-	circAKT3-2	AKT3	hsa-miR-382-5p	ENSG00000164323	CFAP97	0
chr1-244025924	rs78680111	chr1_243645893_243843282:-	circAKT3-2	AKT3	hsa-miR-337-3p	ENSG00000164323	CFAP97	0
chr1-244025924	rs78680111	chr1_243645893_243843282:-	circAKT3-2	AKT3	hsa-miR-382-5p	ENSG00000164323	CFAP97	0
chr1-244035197	rs10927113	chr1_243645893_243843282:-	circAKT3-2	AKT3	hsa-miR-337-3p	ENSG00000164323	CFAP97	0
chr1-244035197	rs10927113	chr1_243645893_243843282:-	circAKT3-2	AKT3	hsa-miR-382-5p	ENSG00000164323	CFAP97	0
chr1-244023952	rs1353196	chr1_243645893_243843282:-	circAKT3-2	AKT3	hsa-miR-3611	ENSG00000182287	AP1S2	0
chr1-244035197	rs10927113	chr1_243645893_243843282:-	circAKT3-2	AKT3	hsa-miR-3611	ENSG00000182287	AP1S2	0
chr1-78012542	rs111583688	chr1_77801331_77815231:+	circMIGA1	MIGA1	hsa-miR-26a-5p	ENSG00000006659	LGALS14	0
chr1-78012542	rs111583688	chr1_77801331_77815231:+	circMIGA1	MIGA1	hsa-miR-26b-5p	ENSG00000006659	LGALS14	0
chr1-77695201	rs113171637	chr1_77801331_77815231:+	circMIGA1	MIGA1	hsa-miR-26a-5p	ENSG00000053371	AKR7A2	0
chr1-77695201	rs113171637	chr1_77801331_77815231:+	circMIGA1	MIGA1	hsa-miR-26b-5p	ENSG00000053371	AKR7A2	0
chr1-78012542	rs111583688	chr1_77801331_77815231:+	circMIGA1	MIGA1	hsa-miR-26a-5p	ENSG00000087510	TFAP2C	0
chr1-78012542	rs111583688	chr1_77801331_77815231:+	circMIGA1	MIGA1	hsa-miR-26b-5p	ENSG00000087510	TFAP2C	0
chr1-77695201	rs113171637	chr1_77801331_77815231:+	circMIGA1	MIGA1	hsa-miR-26a-5p	ENSG00000109101	FOXN1	0
chr1-77695201	rs113171637	chr1_77801331_77815231:+	circMIGA1	MIGA1	hsa-miR-26b-5p	ENSG00000109101	FOXN1	0
chr1-77756172	rs113263617	chr1_77801331_77815231:+	circMIGA1	MIGA1	hsa-miR-26a-5p	ENSG00000109101	FOXN1	0
chr1-77756172	rs113263617	chr1_77801331_77815231:+	circMIGA1	MIGA1	hsa-miR-26b-5p	ENSG00000109101	FOXN1	0
chr1-78012542	rs111583688	chr1_77801331_77815231:+	circMIGA1	MIGA1	hsa-miR-26a-5p	ENSG00000109101	FOXN1	0
chr1-78012542	rs111583688	chr1_77801331_77815231:+	circMIGA1	MIGA1	hsa-miR-26b-5p	ENSG00000109101	FOXN1	0
chr1-77695201	rs113171637	chr1_77801331_77815231:+	circMIGA1	MIGA1	hsa-miR-432-5p	ENSG00000125398	SOX9	0
chr1-77756172	rs113263617	chr1_77801331_77815231:+	circMIGA1	MIGA1	hsa-miR-432-5p	ENSG00000125398	SOX9	0
chr1-77695201	rs113171637	chr1_77801331_77815231:+	circMIGA1	MIGA1	hsa-miR-26a-5p	ENSG00000127920	GNG11	0
chr1-77695201	rs113171637	chr1_77801331_77815231:+	circMIGA1	MIGA1	hsa-miR-26b-5p	ENSG00000127920	GNG11	0
chr1-77756172	rs113263617	chr1_77801331_77815231:+	circMIGA1	MIGA1	hsa-miR-26a-5p	ENSG00000127920	GNG11	0
chr1-77756172	rs113263617	chr1_77801331_77815231:+	circMIGA1	MIGA1	hsa-miR-26b-5p	ENSG00000127920	GNG11	0
chr1-78012542	rs111583688	chr1_77801331_77815231:+	circMIGA1	MIGA1	hsa-miR-26a-5p	ENSG00000127920	GNG11	0
chr1-78012542	rs111583688	chr1_77801331_77815231:+	circMIGA1	MIGA1	hsa-miR-26b-5p	ENSG00000127920	GNG11	0
chr1-77695201	rs113171637	chr1_77801331_77815231:+	circMIGA1	MIGA1	hsa-miR-26a-5p	ENSG00000134824	FADS2	0
chr1-77695201	rs113171637	chr1_77801331_77815231:+	circMIGA1	MIGA1	hsa-miR-26b-5p	ENSG00000134824	FADS2	0
chr1-77695201	rs113171637	chr1_77801331_77815231:+	circMIGA1	MIGA1	hsa-miR-432-5p	ENSG00000134824	FADS2	0
chr1-77756172	rs113263617	chr1_77801331_77815231:+	circMIGA1	MIGA1	hsa-miR-26a-5p	ENSG00000134824	FADS2	0
chr1-77756172	rs113263617	chr1_77801331_77815231:+	circMIGA1	MIGA1	hsa-miR-26b-5p	ENSG00000134824	FADS2	0
chr1-77756172	rs113263617	chr1_77801331_77815231:+	circMIGA1	MIGA1	hsa-miR-432-5p	ENSG00000134824	FADS2	0
chr1-78012542	rs111583688	chr1_77801331_77815231:+	circMIGA1	MIGA1	hsa-miR-26a-5p	ENSG00000134824	FADS2	0
chr1-78012542	rs111583688	chr1_77801331_77815231:+	circMIGA1	MIGA1	hsa-miR-26b-5p	ENSG00000134824	FADS2	0
chr1-78012542	rs111583688	chr1_77801331_77815231:+	circMIGA1	MIGA1	hsa-miR-432-5p	ENSG00000134824	FADS2	0
chr1-77695201	rs113171637	chr1_77801331_77815231:+	circMIGA1	MIGA1	hsa-miR-26a-5p	ENSG00000135540	NHSL1	0
chr1-77695201	rs113171637	chr1_77801331_77815231:+	circMIGA1	MIGA1	hsa-miR-26b-5p	ENSG00000135540	NHSL1	0
chr1-77756172	rs113263617	chr1_77801331_77815231:+	circMIGA1	MIGA1	hsa-miR-26a-5p	ENSG00000135540	NHSL1	0
chr1-77756172	rs113263617	chr1_77801331_77815231:+	circMIGA1	MIGA1	hsa-miR-26b-5p	ENSG00000135540	NHSL1	0
chr1-78012542	rs111583688	chr1_77801331_77815231:+	circMIGA1	MIGA1	hsa-miR-26a-5p	ENSG00000143376	SNX27	0
chr1-78012542	rs111583688	chr1_77801331_77815231:+	circMIGA1	MIGA1	hsa-miR-26b-5p	ENSG00000143376	SNX27	0
chr1-78012542	rs111583688	chr1_77801331_77815231:+	circMIGA1	MIGA1	hsa-miR-432-5p	ENSG00000143376	SNX27	0
chr1-77695201	rs113171637	chr1_77801331_77815231:+	circMIGA1	MIGA1	hsa-miR-26a-5p	ENSG00000145555	MYO10	0
chr1-77695201	rs113171637	chr1_77801331_77815231:+	circMIGA1	MIGA1	hsa-miR-26b-5p	ENSG00000145555	MYO10	0
chr1-77756172	rs113263617	chr1_77801331_77815231:+	circMIGA1	MIGA1	hsa-miR-26a-5p	ENSG00000145555	MYO10	0
chr1-77756172	rs113263617	chr1_77801331_77815231:+	circMIGA1	MIGA1	hsa-miR-26b-5p	ENSG00000145555	MYO10	0
chr1-78012542	rs111583688	chr1_77801331_77815231:+	circMIGA1	MIGA1	hsa-miR-26a-5p	ENSG00000145555	MYO10	0
chr1-78012542	rs111583688	chr1_77801331_77815231:+	circMIGA1	MIGA1	hsa-miR-26b-5p	ENSG00000145555	MYO10	0
chr1-77695201	rs113171637	chr1_77801331_77815231:+	circMIGA1	MIGA1	hsa-miR-26a-5p	ENSG00000154856	APCDD1	0
chr1-77695201	rs113171637	chr1_77801331_77815231:+	circMIGA1	MIGA1	hsa-miR-26b-5p	ENSG00000154856	APCDD1	0
chr1-77756172	rs113263617	chr1_77801331_77815231:+	circMIGA1	MIGA1	hsa-miR-26a-5p	ENSG00000154856	APCDD1	0
chr1-77756172	rs113263617	chr1_77801331_77815231:+	circMIGA1	MIGA1	hsa-miR-26b-5p	ENSG00000154856	APCDD1	0
chr1-78012542	rs111583688	chr1_77801331_77815231:+	circMIGA1	MIGA1	hsa-miR-26a-5p	ENSG00000154856	APCDD1	0
chr1-78012542	rs111583688	chr1_77801331_77815231:+	circMIGA1	MIGA1	hsa-miR-26b-5p	ENSG00000154856	APCDD1	0
chr1-77695201	rs113171637	chr1_77801331_77815231:+	circMIGA1	MIGA1	hsa-miR-26a-5p	ENSG00000159176	CSRP1	0
chr1-77695201	rs113171637	chr1_77801331_77815231:+	circMIGA1	MIGA1	hsa-miR-26b-5p	ENSG00000159176	CSRP1	0
chr1-77756172	rs113263617	chr1_77801331_77815231:+	circMIGA1	MIGA1	hsa-miR-26a-5p	ENSG00000159176	CSRP1	0
chr1-77756172	rs113263617	chr1_77801331_77815231:+	circMIGA1	MIGA1	hsa-miR-26b-5p	ENSG00000159176	CSRP1	0
chr1-78012542	rs111583688	chr1_77801331_77815231:+	circMIGA1	MIGA1	hsa-miR-26a-5p	ENSG00000159176	CSRP1	0
chr1-78012542	rs111583688	chr1_77801331_77815231:+	circMIGA1	MIGA1	hsa-miR-26b-5p	ENSG00000159176	CSRP1	0
chr1-77695201	rs113171637	chr1_77801331_77815231:+	circMIGA1	MIGA1	hsa-miR-26a-5p	ENSG00000163083	INHBB	0
chr1-77695201	rs113171637	chr1_77801331_77815231:+	circMIGA1	MIGA1	hsa-miR-26b-5p	ENSG00000163083	INHBB	0
chr1-77695201	rs113171637	chr1_77801331_77815231:+	circMIGA1	MIGA1	hsa-miR-432-5p	ENSG00000163083	INHBB	0
chr1-77756172	rs113263617	chr1_77801331_77815231:+	circMIGA1	MIGA1	hsa-miR-26a-5p	ENSG00000163083	INHBB	0
chr1-77756172	rs113263617	chr1_77801331_77815231:+	circMIGA1	MIGA1	hsa-miR-26b-5p	ENSG00000163083	INHBB	0
chr1-77756172	rs113263617	chr1_77801331_77815231:+	circMIGA1	MIGA1	hsa-miR-432-5p	ENSG00000163083	INHBB	0
chr1-78012542	rs111583688	chr1_77801331_77815231:+	circMIGA1	MIGA1	hsa-miR-432-5p	ENSG00000169876	MUC17	0
chr1-77695201	rs113171637	chr1_77801331_77815231:+	circMIGA1	MIGA1	hsa-miR-26a-5p	ENSG00000170689	HOXB9	0
chr1-77695201	rs113171637	chr1_77801331_77815231:+	circMIGA1	MIGA1	hsa-miR-26b-5p	ENSG00000170689	HOXB9	0
chr1-77695201	rs113171637	chr1_77801331_77815231:+	circMIGA1	MIGA1	hsa-miR-432-5p	ENSG00000170689	HOXB9	0
chr1-77756172	rs113263617	chr1_77801331_77815231:+	circMIGA1	MIGA1	hsa-miR-26a-5p	ENSG00000170689	HOXB9	0
chr1-77756172	rs113263617	chr1_77801331_77815231:+	circMIGA1	MIGA1	hsa-miR-26b-5p	ENSG00000170689	HOXB9	0
chr1-77756172	rs113263617	chr1_77801331_77815231:+	circMIGA1	MIGA1	hsa-miR-432-5p	ENSG00000170689	HOXB9	0
chr1-78012542	rs111583688	chr1_77801331_77815231:+	circMIGA1	MIGA1	hsa-miR-26a-5p	ENSG00000170689	HOXB9	0
chr1-78012542	rs111583688	chr1_77801331_77815231:+	circMIGA1	MIGA1	hsa-miR-26b-5p	ENSG00000170689	HOXB9	0
chr1-78012542	rs111583688	chr1_77801331_77815231:+	circMIGA1	MIGA1	hsa-miR-432-5p	ENSG00000170689	HOXB9	0
chr1-77695201	rs113171637	chr1_77801331_77815231:+	circMIGA1	MIGA1	hsa-miR-26a-5p	ENSG00000170915	PAQR8	0
chr1-77695201	rs113171637	chr1_77801331_77815231:+	circMIGA1	MIGA1	hsa-miR-26b-5p	ENSG00000170915	PAQR8	0
chr1-77695201	rs113171637	chr1_77801331_77815231:+	circMIGA1	MIGA1	hsa-miR-432-5p	ENSG00000170915	PAQR8	0
chr1-77756172	rs113263617	chr1_77801331_77815231:+	circMIGA1	MIGA1	hsa-miR-26a-5p	ENSG00000170915	PAQR8	0
chr1-77756172	rs113263617	chr1_77801331_77815231:+	circMIGA1	MIGA1	hsa-miR-26b-5p	ENSG00000170915	PAQR8	0
chr1-77756172	rs113263617	chr1_77801331_77815231:+	circMIGA1	MIGA1	hsa-miR-432-5p	ENSG00000170915	PAQR8	0
chr1-77695201	rs113171637	chr1_77801331_77815231:+	circMIGA1	MIGA1	hsa-miR-26a-5p	ENSG00000177283	FZD8	0
chr1-77695201	rs113171637	chr1_77801331_77815231:+	circMIGA1	MIGA1	hsa-miR-26b-5p	ENSG00000177283	FZD8	0
chr1-77756172	rs113263617	chr1_77801331_77815231:+	circMIGA1	MIGA1	hsa-miR-26a-5p	ENSG00000177283	FZD8	0
chr1-77756172	rs113263617	chr1_77801331_77815231:+	circMIGA1	MIGA1	hsa-miR-26b-5p	ENSG00000177283	FZD8	0
chr1-78012542	rs111583688	chr1_77801331_77815231:+	circMIGA1	MIGA1	hsa-miR-432-5p	ENSG00000184012	TMPRSS2	0
chr1-78012542	rs111583688	chr1_77801331_77815231:+	circMIGA1	MIGA1	hsa-miR-432-5p	ENSG00000197576	HOXA4	0
chr1-78012542	rs111583688	chr1_77801331_77815231:+	circMIGA1	MIGA1	hsa-miR-26a-5p	ENSG00000267318	AC005702.2	0
chr1-78012542	rs111583688	chr1_77801331_77815231:+	circMIGA1	MIGA1	hsa-miR-26b-5p	ENSG00000267318	AC005702.2	0
chr1-84213455	rs41301176	chr1_84179177_84197824:+	circPRKACB	PRKACB	hsa-miR-153-3p	ENSG00000068078	FGFR3	0
chr1-84213455	rs41301176	chr1_84179177_84197824:+	circPRKACB	PRKACB	hsa-miR-361-3p	ENSG00000068078	FGFR3	0
chr1-84213455	rs41301176	chr1_84179177_84197824:+	circPRKACB	PRKACB	hsa-miR-369-3p	ENSG00000072840	EVC	0
chr1-84213455	rs41301176	chr1_84179177_84197824:+	circPRKACB	PRKACB	hsa-miR-200b-3p	ENSG00000073282	TP63	0
chr1-84213455	rs41301176	chr1_84179177_84197824:+	circPRKACB	PRKACB	hsa-miR-361-3p	ENSG00000073282	TP63	0
chr1-84213455	rs41301176	chr1_84179177_84197824:+	circPRKACB	PRKACB	hsa-miR-369-3p	ENSG00000073282	TP63	0
chr1-84213455	rs41301176	chr1_84179177_84197824:+	circPRKACB	PRKACB	hsa-miR-429	ENSG00000073282	TP63	0
chr1-84213455	rs41301176	chr1_84179177_84197824:+	circPRKACB	PRKACB	hsa-miR-361-3p	ENSG00000080573	COL5A3	0
chr1-84213455	rs41301176	chr1_84179177_84197824:+	circPRKACB	PRKACB	hsa-miR-153-3p	ENSG00000092820	EZR	0
chr1-84213455	rs41301176	chr1_84179177_84197824:+	circPRKACB	PRKACB	hsa-miR-182-5p	ENSG00000092820	EZR	0
chr1-84213455	rs41301176	chr1_84179177_84197824:+	circPRKACB	PRKACB	hsa-miR-369-3p	ENSG00000092820	EZR	0
chr1-84213455	rs41301176	chr1_84179177_84197824:+	circPRKACB	PRKACB	hsa-miR-200b-3p	ENSG00000101144	BMP7	0
chr1-84213455	rs41301176	chr1_84179177_84197824:+	circPRKACB	PRKACB	hsa-miR-429	ENSG00000101144	BMP7	0
chr1-84213455	rs41301176	chr1_84179177_84197824:+	circPRKACB	PRKACB	hsa-miR-153-3p	ENSG00000101439	CST3	0
chr1-84213455	rs41301176	chr1_84179177_84197824:+	circPRKACB	PRKACB	hsa-miR-200b-3p	ENSG00000106003	LFNG	0
chr1-84213455	rs41301176	chr1_84179177_84197824:+	circPRKACB	PRKACB	hsa-miR-361-3p	ENSG00000106003	LFNG	0
chr1-84213455	rs41301176	chr1_84179177_84197824:+	circPRKACB	PRKACB	hsa-miR-429	ENSG00000106003	LFNG	0
chr1-84213455	rs41301176	chr1_84179177_84197824:+	circPRKACB	PRKACB	hsa-miR-153-3p	ENSG00000107562	CXCL12	0
chr1-84213455	rs41301176	chr1_84179177_84197824:+	circPRKACB	PRKACB	hsa-miR-182-5p	ENSG00000107562	CXCL12	0
chr1-84213455	rs41301176	chr1_84179177_84197824:+	circPRKACB	PRKACB	hsa-miR-200b-3p	ENSG00000107562	CXCL12	0
chr1-84213455	rs41301176	chr1_84179177_84197824:+	circPRKACB	PRKACB	hsa-miR-3200-5p	ENSG00000107562	CXCL12	0
chr1-84213455	rs41301176	chr1_84179177_84197824:+	circPRKACB	PRKACB	hsa-miR-361-3p	ENSG00000107562	CXCL12	0
chr1-84213455	rs41301176	chr1_84179177_84197824:+	circPRKACB	PRKACB	hsa-miR-369-3p	ENSG00000107562	CXCL12	0
chr1-84213455	rs41301176	chr1_84179177_84197824:+	circPRKACB	PRKACB	hsa-miR-429	ENSG00000107562	CXCL12	0
chr1-84213455	rs41301176	chr1_84179177_84197824:+	circPRKACB	PRKACB	hsa-miR-2681-5p	ENSG00000112837	TBX18	0
chr1-84213455	rs41301176	chr1_84179177_84197824:+	circPRKACB	PRKACB	hsa-miR-182-5p	ENSG00000119711	ALDH6A1	0
chr1-84213455	rs41301176	chr1_84179177_84197824:+	circPRKACB	PRKACB	hsa-miR-2681-5p	ENSG00000119711	ALDH6A1	0
chr1-84213455	rs41301176	chr1_84179177_84197824:+	circPRKACB	PRKACB	hsa-miR-3200-5p	ENSG00000119711	ALDH6A1	0
chr1-84213455	rs41301176	chr1_84179177_84197824:+	circPRKACB	PRKACB	hsa-miR-153-3p	ENSG00000127418	FGFRL1	0
chr1-84213455	rs41301176	chr1_84179177_84197824:+	circPRKACB	PRKACB	hsa-miR-361-3p	ENSG00000127418	FGFRL1	0
chr1-84213455	rs41301176	chr1_84179177_84197824:+	circPRKACB	PRKACB	hsa-miR-153-3p	ENSG00000134824	FADS2	0
chr1-84213455	rs41301176	chr1_84179177_84197824:+	circPRKACB	PRKACB	hsa-miR-361-3p	ENSG00000134824	FADS2	0
chr1-84213455	rs41301176	chr1_84179177_84197824:+	circPRKACB	PRKACB	hsa-miR-153-3p	ENSG00000135540	NHSL1	0
chr1-84213455	rs41301176	chr1_84179177_84197824:+	circPRKACB	PRKACB	hsa-miR-361-3p	ENSG00000135540	NHSL1	0
chr1-84213455	rs41301176	chr1_84179177_84197824:+	circPRKACB	PRKACB	hsa-miR-369-3p	ENSG00000135540	NHSL1	0
chr1-84213455	rs41301176	chr1_84179177_84197824:+	circPRKACB	PRKACB	hsa-miR-153-3p	ENSG00000138449	SLC40A1	0
chr1-84213455	rs41301176	chr1_84179177_84197824:+	circPRKACB	PRKACB	hsa-miR-2681-5p	ENSG00000138449	SLC40A1	0
chr1-84213455	rs41301176	chr1_84179177_84197824:+	circPRKACB	PRKACB	hsa-miR-200b-3p	ENSG00000142599	RERE	0
chr1-84213455	rs41301176	chr1_84179177_84197824:+	circPRKACB	PRKACB	hsa-miR-361-3p	ENSG00000142599	RERE	0
chr1-84213455	rs41301176	chr1_84179177_84197824:+	circPRKACB	PRKACB	hsa-miR-429	ENSG00000142599	RERE	0
chr1-84213455	rs41301176	chr1_84179177_84197824:+	circPRKACB	PRKACB	hsa-miR-200b-3p	ENSG00000154114	TBCEL	0
chr1-84213455	rs41301176	chr1_84179177_84197824:+	circPRKACB	PRKACB	hsa-miR-429	ENSG00000154114	TBCEL	0
chr1-84213455	rs41301176	chr1_84179177_84197824:+	circPRKACB	PRKACB	hsa-miR-369-3p	ENSG00000154856	APCDD1	0
chr1-84213455	rs41301176	chr1_84179177_84197824:+	circPRKACB	PRKACB	hsa-miR-361-3p	ENSG00000159176	CSRP1	0
chr1-84213455	rs41301176	chr1_84179177_84197824:+	circPRKACB	PRKACB	hsa-miR-182-5p	ENSG00000159423	ALDH4A1	0
chr1-84213455	rs41301176	chr1_84179177_84197824:+	circPRKACB	PRKACB	hsa-miR-200b-3p	ENSG00000159423	ALDH4A1	0
chr1-84213455	rs41301176	chr1_84179177_84197824:+	circPRKACB	PRKACB	hsa-miR-361-3p	ENSG00000159423	ALDH4A1	0
chr1-84213455	rs41301176	chr1_84179177_84197824:+	circPRKACB	PRKACB	hsa-miR-429	ENSG00000159423	ALDH4A1	0
chr1-84213455	rs41301176	chr1_84179177_84197824:+	circPRKACB	PRKACB	hsa-miR-361-3p	ENSG00000164651	SP8	0
chr1-84213455	rs41301176	chr1_84179177_84197824:+	circPRKACB	PRKACB	hsa-miR-153-3p	ENSG00000170027	YWHAG	0
chr1-84213455	rs41301176	chr1_84179177_84197824:+	circPRKACB	PRKACB	hsa-miR-182-5p	ENSG00000170027	YWHAG	0
chr1-84213455	rs41301176	chr1_84179177_84197824:+	circPRKACB	PRKACB	hsa-miR-200b-3p	ENSG00000170027	YWHAG	0
chr1-84213455	rs41301176	chr1_84179177_84197824:+	circPRKACB	PRKACB	hsa-miR-361-3p	ENSG00000170027	YWHAG	0
chr1-84213455	rs41301176	chr1_84179177_84197824:+	circPRKACB	PRKACB	hsa-miR-429	ENSG00000170027	YWHAG	0
chr1-84213455	rs41301176	chr1_84179177_84197824:+	circPRKACB	PRKACB	hsa-miR-200b-3p	ENSG00000173905	GOLIM4	0
chr1-84213455	rs41301176	chr1_84179177_84197824:+	circPRKACB	PRKACB	hsa-miR-429	ENSG00000173905	GOLIM4	0
chr1-84213455	rs41301176	chr1_84179177_84197824:+	circPRKACB	PRKACB	hsa-miR-200b-3p	ENSG00000173917	HOXB2	0
chr1-84213455	rs41301176	chr1_84179177_84197824:+	circPRKACB	PRKACB	hsa-miR-429	ENSG00000173917	HOXB2	0
chr1-84213455	rs41301176	chr1_84179177_84197824:+	circPRKACB	PRKACB	hsa-miR-153-3p	ENSG00000179604	CDC42EP4	0
chr1-84213455	rs41301176	chr1_84179177_84197824:+	circPRKACB	PRKACB	hsa-miR-182-5p	ENSG00000179604	CDC42EP4	0
chr1-84213455	rs41301176	chr1_84179177_84197824:+	circPRKACB	PRKACB	hsa-miR-361-3p	ENSG00000179604	CDC42EP4	0
chr1-84213455	rs41301176	chr1_84179177_84197824:+	circPRKACB	PRKACB	hsa-miR-369-3p	ENSG00000179604	CDC42EP4	0
chr1-84213455	rs41301176	chr1_84179177_84197824:+	circPRKACB	PRKACB	hsa-miR-369-3p	ENSG00000182247	UBE2E2	0
chr1-84213455	rs41301176	chr1_84179177_84197824:+	circPRKACB	PRKACB	hsa-miR-182-5p	ENSG00000182324	KCNJ14	0
chr1-84213455	rs41301176	chr1_84179177_84197824:+	circPRKACB	PRKACB	hsa-miR-182-5p	ENSG00000183579	ZNRF3	0
chr1-84213455	rs41301176	chr1_84179177_84197824:+	circPRKACB	PRKACB	hsa-miR-361-3p	ENSG00000183579	ZNRF3	0
chr1-84213455	rs41301176	chr1_84179177_84197824:+	circPRKACB	PRKACB	hsa-miR-369-3p	ENSG00000183579	ZNRF3	0
chr1-84213455	rs41301176	chr1_84179177_84197824:+	circPRKACB	PRKACB	hsa-miR-182-5p	ENSG00000184160	ADRA2C	0
chr1-84213455	rs41301176	chr1_84179177_84197824:+	circPRKACB	PRKACB	hsa-miR-200b-3p	ENSG00000184160	ADRA2C	0
chr1-84213455	rs41301176	chr1_84179177_84197824:+	circPRKACB	PRKACB	hsa-miR-429	ENSG00000184160	ADRA2C	0
chr10-14745697	rs150549021	chr10_14896846_14897517:+	circSUV39H2	SUV39H2	hsa-miR-144-3p	ENSG00000050628	PTGER3	0
chr10-14745697	rs150549021	chr10_14896846_14897517:+	circSUV39H2	SUV39H2	hsa-miR-214-3p	ENSG00000050628	PTGER3	0
chr10-14745697	rs150549021	chr10_14896846_14897517:+	circSUV39H2	SUV39H2	hsa-miR-380-3p	ENSG00000050628	PTGER3	0
chr10-14745697	rs150549021	chr10_14896846_14897517:+	circSUV39H2	SUV39H2	hsa-miR-382-3p	ENSG00000050628	PTGER3	0
chr10-14745697	rs150549021	chr10_14896846_14897517:+	circSUV39H2	SUV39H2	hsa-miR-577	ENSG00000050628	PTGER3	0
chr10-14749716	rs12414102	chr10_14896846_14897517:+	circSUV39H2	SUV39H2	hsa-miR-144-3p	ENSG00000050628	PTGER3	0
chr10-14749716	rs12414102	chr10_14896846_14897517:+	circSUV39H2	SUV39H2	hsa-miR-214-3p	ENSG00000050628	PTGER3	0
chr10-14749716	rs12414102	chr10_14896846_14897517:+	circSUV39H2	SUV39H2	hsa-miR-380-3p	ENSG00000050628	PTGER3	0
chr10-14749716	rs12414102	chr10_14896846_14897517:+	circSUV39H2	SUV39H2	hsa-miR-382-3p	ENSG00000050628	PTGER3	0
chr10-14749716	rs12414102	chr10_14896846_14897517:+	circSUV39H2	SUV39H2	hsa-miR-577	ENSG00000050628	PTGER3	0
chr10-14902027	rs117302616	chr10_14896846_14897517:+	circSUV39H2	SUV39H2	hsa-miR-144-3p	ENSG00000050628	PTGER3	0
chr10-14902027	rs117302616	chr10_14896846_14897517:+	circSUV39H2	SUV39H2	hsa-miR-214-3p	ENSG00000050628	PTGER3	0
chr10-14902027	rs117302616	chr10_14896846_14897517:+	circSUV39H2	SUV39H2	hsa-miR-380-3p	ENSG00000050628	PTGER3	0
chr10-14902027	rs117302616	chr10_14896846_14897517:+	circSUV39H2	SUV39H2	hsa-miR-382-3p	ENSG00000050628	PTGER3	0
chr10-14902027	rs117302616	chr10_14896846_14897517:+	circSUV39H2	SUV39H2	hsa-miR-577	ENSG00000050628	PTGER3	0
chr10-14762213	rs75350674	chr10_14896846_14897517:+	circSUV39H2	SUV39H2	hsa-miR-1286	ENSG00000056097	ZFR	0
chr10-14762213	rs75350674	chr10_14896846_14897517:+	circSUV39H2	SUV39H2	hsa-miR-144-3p	ENSG00000056097	ZFR	0
chr10-14762213	rs75350674	chr10_14896846_14897517:+	circSUV39H2	SUV39H2	hsa-miR-200b-3p	ENSG00000056097	ZFR	0
chr10-14762213	rs75350674	chr10_14896846_14897517:+	circSUV39H2	SUV39H2	hsa-miR-214-3p	ENSG00000056097	ZFR	0
chr10-14762213	rs75350674	chr10_14896846_14897517:+	circSUV39H2	SUV39H2	hsa-miR-380-3p	ENSG00000056097	ZFR	0
chr10-14762213	rs75350674	chr10_14896846_14897517:+	circSUV39H2	SUV39H2	hsa-miR-421	ENSG00000056097	ZFR	0
chr10-14762213	rs75350674	chr10_14896846_14897517:+	circSUV39H2	SUV39H2	hsa-miR-429	ENSG00000056097	ZFR	0
chr10-14762213	rs75350674	chr10_14896846_14897517:+	circSUV39H2	SUV39H2	hsa-miR-577	ENSG00000056097	ZFR	0
chr10-14745697	rs150549021	chr10_14896846_14897517:+	circSUV39H2	SUV39H2	hsa-miR-450b-5p	ENSG00000107669	ATE1	0
chr10-14745697	rs150549021	chr10_14896846_14897517:+	circSUV39H2	SUV39H2	hsa-miR-541-3p	ENSG00000107669	ATE1	0
chr10-14749716	rs12414102	chr10_14896846_14897517:+	circSUV39H2	SUV39H2	hsa-miR-450b-5p	ENSG00000107669	ATE1	0
chr10-14749716	rs12414102	chr10_14896846_14897517:+	circSUV39H2	SUV39H2	hsa-miR-541-3p	ENSG00000107669	ATE1	0
chr10-14902027	rs117302616	chr10_14896846_14897517:+	circSUV39H2	SUV39H2	hsa-miR-450b-5p	ENSG00000107669	ATE1	0
chr10-14902027	rs117302616	chr10_14896846_14897517:+	circSUV39H2	SUV39H2	hsa-miR-541-3p	ENSG00000107669	ATE1	0
chr10-14762213	rs75350674	chr10_14896846_14897517:+	circSUV39H2	SUV39H2	hsa-miR-577	ENSG00000108561	C1QBP	0
chr10-14745697	rs150549021	chr10_14896846_14897517:+	circSUV39H2	SUV39H2	hsa-miR-376a-3p	ENSG00000112357	PEX7	0
chr10-14745697	rs150549021	chr10_14896846_14897517:+	circSUV39H2	SUV39H2	hsa-miR-376b-3p	ENSG00000112357	PEX7	0
chr10-14749716	rs12414102	chr10_14896846_14897517:+	circSUV39H2	SUV39H2	hsa-miR-376a-3p	ENSG00000112357	PEX7	0
chr10-14749716	rs12414102	chr10_14896846_14897517:+	circSUV39H2	SUV39H2	hsa-miR-376b-3p	ENSG00000112357	PEX7	0
chr10-14902027	rs117302616	chr10_14896846_14897517:+	circSUV39H2	SUV39H2	hsa-miR-376a-3p	ENSG00000112357	PEX7	0
chr10-14902027	rs117302616	chr10_14896846_14897517:+	circSUV39H2	SUV39H2	hsa-miR-376b-3p	ENSG00000112357	PEX7	0
chr10-14762213	rs75350674	chr10_14896846_14897517:+	circSUV39H2	SUV39H2	hsa-miR-380-3p	ENSG00000114520	SNX4	0
chr10-14762213	rs75350674	chr10_14896846_14897517:+	circSUV39H2	SUV39H2	hsa-miR-450b-5p	ENSG00000114520	SNX4	0
chr10-14762213	rs75350674	chr10_14896846_14897517:+	circSUV39H2	SUV39H2	hsa-miR-1286	ENSG00000120688	WBP4	0
chr10-14762213	rs75350674	chr10_14896846_14897517:+	circSUV39H2	SUV39H2	hsa-miR-200b-3p	ENSG00000120688	WBP4	0
chr10-14762213	rs75350674	chr10_14896846_14897517:+	circSUV39H2	SUV39H2	hsa-miR-429	ENSG00000120688	WBP4	0
chr10-14762213	rs75350674	chr10_14896846_14897517:+	circSUV39H2	SUV39H2	hsa-miR-577	ENSG00000120688	WBP4	0
chr10-14745697	rs150549021	chr10_14896846_14897517:+	circSUV39H2	SUV39H2	hsa-miR-144-3p	ENSG00000121766	ZCCHC17	0
chr10-14745697	rs150549021	chr10_14896846_14897517:+	circSUV39H2	SUV39H2	hsa-miR-214-3p	ENSG00000121766	ZCCHC17	0
chr10-14749716	rs12414102	chr10_14896846_14897517:+	circSUV39H2	SUV39H2	hsa-miR-144-3p	ENSG00000121766	ZCCHC17	0
chr10-14749716	rs12414102	chr10_14896846_14897517:+	circSUV39H2	SUV39H2	hsa-miR-214-3p	ENSG00000121766	ZCCHC17	0
chr10-14762213	rs75350674	chr10_14896846_14897517:+	circSUV39H2	SUV39H2	hsa-miR-144-3p	ENSG00000121766	ZCCHC17	0
chr10-14762213	rs75350674	chr10_14896846_14897517:+	circSUV39H2	SUV39H2	hsa-miR-214-3p	ENSG00000121766	ZCCHC17	0
chr10-14902027	rs117302616	chr10_14896846_14897517:+	circSUV39H2	SUV39H2	hsa-miR-144-3p	ENSG00000121766	ZCCHC17	0
chr10-14902027	rs117302616	chr10_14896846_14897517:+	circSUV39H2	SUV39H2	hsa-miR-214-3p	ENSG00000121766	ZCCHC17	0
chr10-14762213	rs75350674	chr10_14896846_14897517:+	circSUV39H2	SUV39H2	hsa-miR-1286	ENSG00000122644	ARL4A	0
chr10-14762213	rs75350674	chr10_14896846_14897517:+	circSUV39H2	SUV39H2	hsa-miR-200b-3p	ENSG00000122644	ARL4A	0
chr10-14762213	rs75350674	chr10_14896846_14897517:+	circSUV39H2	SUV39H2	hsa-miR-214-3p	ENSG00000122644	ARL4A	0
chr10-14762213	rs75350674	chr10_14896846_14897517:+	circSUV39H2	SUV39H2	hsa-miR-380-3p	ENSG00000122644	ARL4A	0
chr10-14762213	rs75350674	chr10_14896846_14897517:+	circSUV39H2	SUV39H2	hsa-miR-421	ENSG00000122644	ARL4A	0
chr10-14762213	rs75350674	chr10_14896846_14897517:+	circSUV39H2	SUV39H2	hsa-miR-429	ENSG00000122644	ARL4A	0
chr10-14762213	rs75350674	chr10_14896846_14897517:+	circSUV39H2	SUV39H2	hsa-miR-450b-5p	ENSG00000122644	ARL4A	0
chr10-14762213	rs75350674	chr10_14896846_14897517:+	circSUV39H2	SUV39H2	hsa-miR-577	ENSG00000122644	ARL4A	0
chr10-14762213	rs75350674	chr10_14896846_14897517:+	circSUV39H2	SUV39H2	hsa-miR-144-3p	ENSG00000133135	RNF128	0
chr10-14762213	rs75350674	chr10_14896846_14897517:+	circSUV39H2	SUV39H2	hsa-miR-380-3p	ENSG00000133135	RNF128	0
chr10-14762213	rs75350674	chr10_14896846_14897517:+	circSUV39H2	SUV39H2	hsa-miR-450b-5p	ENSG00000133135	RNF128	0
chr10-14762213	rs75350674	chr10_14896846_14897517:+	circSUV39H2	SUV39H2	hsa-miR-421	ENSG00000143436	MRPL9	0
chr10-14762213	rs75350674	chr10_14896846_14897517:+	circSUV39H2	SUV39H2	hsa-miR-1286	ENSG00000161956	SENP3	0
chr10-14762213	rs75350674	chr10_14896846_14897517:+	circSUV39H2	SUV39H2	hsa-miR-421	ENSG00000161956	SENP3	0
chr10-14745697	rs150549021	chr10_14896846_14897517:+	circSUV39H2	SUV39H2	hsa-miR-1286	ENSG00000162735	PEX19	0
chr10-14745697	rs150549021	chr10_14896846_14897517:+	circSUV39H2	SUV39H2	hsa-miR-200b-3p	ENSG00000162735	PEX19	0
chr10-14745697	rs150549021	chr10_14896846_14897517:+	circSUV39H2	SUV39H2	hsa-miR-214-3p	ENSG00000162735	PEX19	0
chr10-14745697	rs150549021	chr10_14896846_14897517:+	circSUV39H2	SUV39H2	hsa-miR-28-5p	ENSG00000162735	PEX19	0
chr10-14745697	rs150549021	chr10_14896846_14897517:+	circSUV39H2	SUV39H2	hsa-miR-380-3p	ENSG00000162735	PEX19	0
chr10-14745697	rs150549021	chr10_14896846_14897517:+	circSUV39H2	SUV39H2	hsa-miR-429	ENSG00000162735	PEX19	0
chr10-14745697	rs150549021	chr10_14896846_14897517:+	circSUV39H2	SUV39H2	hsa-miR-541-3p	ENSG00000162735	PEX19	0
chr10-14749716	rs12414102	chr10_14896846_14897517:+	circSUV39H2	SUV39H2	hsa-miR-1286	ENSG00000162735	PEX19	0
chr10-14749716	rs12414102	chr10_14896846_14897517:+	circSUV39H2	SUV39H2	hsa-miR-200b-3p	ENSG00000162735	PEX19	0
chr10-14749716	rs12414102	chr10_14896846_14897517:+	circSUV39H2	SUV39H2	hsa-miR-214-3p	ENSG00000162735	PEX19	0
chr10-14749716	rs12414102	chr10_14896846_14897517:+	circSUV39H2	SUV39H2	hsa-miR-28-5p	ENSG00000162735	PEX19	0
chr10-14749716	rs12414102	chr10_14896846_14897517:+	circSUV39H2	SUV39H2	hsa-miR-380-3p	ENSG00000162735	PEX19	0
chr10-14749716	rs12414102	chr10_14896846_14897517:+	circSUV39H2	SUV39H2	hsa-miR-429	ENSG00000162735	PEX19	0
chr10-14749716	rs12414102	chr10_14896846_14897517:+	circSUV39H2	SUV39H2	hsa-miR-541-3p	ENSG00000162735	PEX19	0
chr10-14902027	rs117302616	chr10_14896846_14897517:+	circSUV39H2	SUV39H2	hsa-miR-1286	ENSG00000162735	PEX19	0
chr10-14902027	rs117302616	chr10_14896846_14897517:+	circSUV39H2	SUV39H2	hsa-miR-200b-3p	ENSG00000162735	PEX19	0
chr10-14902027	rs117302616	chr10_14896846_14897517:+	circSUV39H2	SUV39H2	hsa-miR-214-3p	ENSG00000162735	PEX19	0
chr10-14902027	rs117302616	chr10_14896846_14897517:+	circSUV39H2	SUV39H2	hsa-miR-28-5p	ENSG00000162735	PEX19	0
chr10-14902027	rs117302616	chr10_14896846_14897517:+	circSUV39H2	SUV39H2	hsa-miR-380-3p	ENSG00000162735	PEX19	0
chr10-14902027	rs117302616	chr10_14896846_14897517:+	circSUV39H2	SUV39H2	hsa-miR-429	ENSG00000162735	PEX19	0
chr10-14902027	rs117302616	chr10_14896846_14897517:+	circSUV39H2	SUV39H2	hsa-miR-541-3p	ENSG00000162735	PEX19	0
chr10-14762213	rs75350674	chr10_14896846_14897517:+	circSUV39H2	SUV39H2	hsa-miR-193a-5p	ENSG00000165272	AQP3	0
chr10-14762213	rs75350674	chr10_14896846_14897517:+	circSUV39H2	SUV39H2	hsa-miR-214-3p	ENSG00000181061	HIGD1A	0
chr10-14762213	rs75350674	chr10_14896846_14897517:+	circSUV39H2	SUV39H2	hsa-miR-450b-5p	ENSG00000181061	HIGD1A	0
chr10-14762213	rs75350674	chr10_14896846_14897517:+	circSUV39H2	SUV39H2	hsa-miR-144-3p	ENSG00000184983	NDUFA6	0
chr10-14762213	rs75350674	chr10_14896846_14897517:+	circSUV39H2	SUV39H2	hsa-miR-1286	ENSG00000197557	TTC30A	0
chr10-14762213	rs75350674	chr10_14896846_14897517:+	circSUV39H2	SUV39H2	hsa-miR-214-3p	ENSG00000197557	TTC30A	0
chr10-14762213	rs75350674	chr10_14896846_14897517:+	circSUV39H2	SUV39H2	hsa-miR-577	ENSG00000197557	TTC30A	0
chr10-14745697	rs150549021	chr10_14896846_14897517:+	circSUV39H2	SUV39H2	hsa-miR-144-3p	ENSG00000197991	AL592490.1	0
chr10-14749716	rs12414102	chr10_14896846_14897517:+	circSUV39H2	SUV39H2	hsa-miR-144-3p	ENSG00000197991	AL592490.1	0
chr10-14902027	rs117302616	chr10_14896846_14897517:+	circSUV39H2	SUV39H2	hsa-miR-144-3p	ENSG00000197991	AL592490.1	0
chr10-14762213	rs75350674	chr10_14896846_14897517:+	circSUV39H2	SUV39H2	hsa-miR-421	ENSG00000204147	ASAH2B	0
chr10-14745697	rs150549021	chr10_14896846_14897517:+	circSUV39H2	SUV39H2	hsa-miR-421	ENSG00000237651	C2orf74	0
chr10-14745697	rs150549021	chr10_14896846_14897517:+	circSUV39H2	SUV39H2	hsa-miR-450b-5p	ENSG00000237651	C2orf74	0
chr10-14749716	rs12414102	chr10_14896846_14897517:+	circSUV39H2	SUV39H2	hsa-miR-421	ENSG00000237651	C2orf74	0
chr10-14749716	rs12414102	chr10_14896846_14897517:+	circSUV39H2	SUV39H2	hsa-miR-450b-5p	ENSG00000237651	C2orf74	0
chr10-14902027	rs117302616	chr10_14896846_14897517:+	circSUV39H2	SUV39H2	hsa-miR-421	ENSG00000237651	C2orf74	0
chr10-14902027	rs117302616	chr10_14896846_14897517:+	circSUV39H2	SUV39H2	hsa-miR-450b-5p	ENSG00000237651	C2orf74	0
chr10-50547253	rs140575357	chr10_50433476_50466932:-	circSGMS1	SGMS1	hsa-miR-337-3p	ENSG00000075275	CELSR1	0
chr10-50547253	rs140575357	chr10_50433476_50466932:-	circSGMS1	SGMS1	hsa-miR-421	ENSG00000075275	CELSR1	0
chr10-50547253	rs140575357	chr10_50433476_50466932:-	circSGMS1	SGMS1	hsa-miR-452-5p	ENSG00000075275	CELSR1	0
chr10-50547253	rs140575357	chr10_50433476_50466932:-	circSGMS1	SGMS1	hsa-miR-543	ENSG00000075275	CELSR1	0
chr10-50547253	rs140575357	chr10_50433476_50466932:-	circSGMS1	SGMS1	hsa-miR-421	ENSG00000092345	DAZL	0
chr10-50547253	rs140575357	chr10_50433476_50466932:-	circSGMS1	SGMS1	hsa-miR-543	ENSG00000092345	DAZL	0
chr10-50547253	rs140575357	chr10_50433476_50466932:-	circSGMS1	SGMS1	hsa-miR-421	ENSG00000092531	SNAP23	0
chr10-50547253	rs140575357	chr10_50433476_50466932:-	circSGMS1	SGMS1	hsa-miR-452-5p	ENSG00000111981	ULBP1	0
chr10-50547253	rs140575357	chr10_50433476_50466932:-	circSGMS1	SGMS1	hsa-miR-337-3p	ENSG00000112562	SMOC2	0
chr10-50547253	rs140575357	chr10_50433476_50466932:-	circSGMS1	SGMS1	hsa-miR-337-3p	ENSG00000112773	FAM46A	0
chr10-50547253	rs140575357	chr10_50433476_50466932:-	circSGMS1	SGMS1	hsa-miR-421	ENSG00000112773	FAM46A	0
chr10-50547253	rs140575357	chr10_50433476_50466932:-	circSGMS1	SGMS1	hsa-miR-543	ENSG00000112773	FAM46A	0
chr10-50547253	rs140575357	chr10_50433476_50466932:-	circSGMS1	SGMS1	hsa-miR-452-5p	ENSG00000117036	ETV3	0
chr10-50547253	rs140575357	chr10_50433476_50466932:-	circSGMS1	SGMS1	hsa-miR-543	ENSG00000117036	ETV3	0
chr10-50547253	rs140575357	chr10_50433476_50466932:-	circSGMS1	SGMS1	hsa-miR-421	ENSG00000118513	MYB	0
chr10-50547253	rs140575357	chr10_50433476_50466932:-	circSGMS1	SGMS1	hsa-miR-452-5p	ENSG00000118513	MYB	0
chr10-50547253	rs140575357	chr10_50433476_50466932:-	circSGMS1	SGMS1	hsa-miR-421	ENSG00000128165	ADM2	0
chr10-50547253	rs140575357	chr10_50433476_50466932:-	circSGMS1	SGMS1	hsa-miR-543	ENSG00000132002	DNAJB1	0
chr10-50547253	rs140575357	chr10_50433476_50466932:-	circSGMS1	SGMS1	hsa-miR-421	ENSG00000134363	FST	0
chr10-50547253	rs140575357	chr10_50433476_50466932:-	circSGMS1	SGMS1	hsa-miR-324-5p	ENSG00000138771	SHROOM3	0
chr10-50547253	rs140575357	chr10_50433476_50466932:-	circSGMS1	SGMS1	hsa-miR-337-3p	ENSG00000138771	SHROOM3	0
chr10-50547253	rs140575357	chr10_50433476_50466932:-	circSGMS1	SGMS1	hsa-miR-543	ENSG00000138771	SHROOM3	0
chr10-50547253	rs140575357	chr10_50433476_50466932:-	circSGMS1	SGMS1	hsa-miR-324-5p	ENSG00000138835	RGS3	0
chr10-50547253	rs140575357	chr10_50433476_50466932:-	circSGMS1	SGMS1	hsa-miR-337-3p	ENSG00000138835	RGS3	0
chr10-50547253	rs140575357	chr10_50433476_50466932:-	circSGMS1	SGMS1	hsa-miR-452-5p	ENSG00000138942	RNF185	0
chr10-50547253	rs140575357	chr10_50433476_50466932:-	circSGMS1	SGMS1	hsa-miR-324-5p	ENSG00000139722	VPS37B	0
chr10-50547253	rs140575357	chr10_50433476_50466932:-	circSGMS1	SGMS1	hsa-miR-421	ENSG00000139722	VPS37B	0
chr10-50547253	rs140575357	chr10_50433476_50466932:-	circSGMS1	SGMS1	hsa-miR-543	ENSG00000140263	SORD	0
chr10-50547253	rs140575357	chr10_50433476_50466932:-	circSGMS1	SGMS1	hsa-miR-543	ENSG00000140403	DNAJA4	0
chr10-50547253	rs140575357	chr10_50433476_50466932:-	circSGMS1	SGMS1	hsa-miR-543	ENSG00000164023	SGMS2	0
chr10-50547253	rs140575357	chr10_50433476_50466932:-	circSGMS1	SGMS1	hsa-miR-421	ENSG00000164949	GEM	0
chr10-50547253	rs140575357	chr10_50433476_50466932:-	circSGMS1	SGMS1	hsa-miR-452-5p	ENSG00000165376	CLDN2	0
chr10-50547253	rs140575357	chr10_50433476_50466932:-	circSGMS1	SGMS1	hsa-miR-543	ENSG00000166016	ABTB2	0
chr10-50547253	rs140575357	chr10_50433476_50466932:-	circSGMS1	SGMS1	hsa-miR-324-5p	ENSG00000167280	ENGASE	0
chr10-50547253	rs140575357	chr10_50433476_50466932:-	circSGMS1	SGMS1	hsa-miR-421	ENSG00000168256	NKIRAS2	0
chr10-50547253	rs140575357	chr10_50433476_50466932:-	circSGMS1	SGMS1	hsa-miR-337-3p	ENSG00000169981	ZNF35	0
chr10-50547253	rs140575357	chr10_50433476_50466932:-	circSGMS1	SGMS1	hsa-miR-543	ENSG00000169981	ZNF35	0
chr10-50547253	rs140575357	chr10_50433476_50466932:-	circSGMS1	SGMS1	hsa-miR-543	ENSG00000170961	HAS2	0
chr10-50547253	rs140575357	chr10_50433476_50466932:-	circSGMS1	SGMS1	hsa-miR-452-5p	ENSG00000173334	TRIB1	0
chr10-50547253	rs140575357	chr10_50433476_50466932:-	circSGMS1	SGMS1	hsa-miR-324-5p	ENSG00000178996	SNX18	0
chr10-50547253	rs140575357	chr10_50433476_50466932:-	circSGMS1	SGMS1	hsa-miR-452-5p	ENSG00000178996	SNX18	0
chr10-50547253	rs140575357	chr10_50433476_50466932:-	circSGMS1	SGMS1	hsa-miR-543	ENSG00000178996	SNX18	0
chr10-50547253	rs140575357	chr10_50433476_50466932:-	circSGMS1	SGMS1	hsa-miR-543	ENSG00000182459	TEX19	0
chr10-50547253	rs140575357	chr10_50433476_50466932:-	circSGMS1	SGMS1	hsa-miR-324-5p	ENSG00000184378	ACTRT3	0
chr10-50547253	rs140575357	chr10_50433476_50466932:-	circSGMS1	SGMS1	hsa-miR-324-5p	ENSG00000264364	DYNLL2	0
chr12-1328345	rs79543065	chr12_1263034_1290012:+	circERC1-1	ERC1	hsa-miR-29a-3p	ENSG00000003393	ALS2	0
chr12-1328345	rs79543065	chr12_1263034_1290012:+	circERC1-1	ERC1	hsa-miR-29b-3p	ENSG00000003393	ALS2	0
chr12-1328345	rs79543065	chr12_1263034_1290012:+	circERC1-1	ERC1	hsa-miR-29c-3p	ENSG00000003393	ALS2	0
chr12-1411392	rs80018118	chr12_1263034_1290012:+	circERC1-1	ERC1	hsa-miR-29a-3p	ENSG00000003393	ALS2	0
chr12-1411392	rs80018118	chr12_1263034_1290012:+	circERC1-1	ERC1	hsa-miR-29b-3p	ENSG00000003393	ALS2	0
chr12-1411392	rs80018118	chr12_1263034_1290012:+	circERC1-1	ERC1	hsa-miR-29c-3p	ENSG00000003393	ALS2	0
chr12-1420263	rs117601704	chr12_1263034_1290012:+	circERC1-1	ERC1	hsa-miR-29a-3p	ENSG00000003393	ALS2	0
chr12-1420263	rs117601704	chr12_1263034_1290012:+	circERC1-1	ERC1	hsa-miR-29b-3p	ENSG00000003393	ALS2	0
chr12-1420263	rs117601704	chr12_1263034_1290012:+	circERC1-1	ERC1	hsa-miR-29c-3p	ENSG00000003393	ALS2	0
chr12-1328345	rs79543065	chr12_1263034_1290012:+	circERC1-1	ERC1	hsa-miR-29a-3p	ENSG00000005889	ZFX	0
chr12-1328345	rs79543065	chr12_1263034_1290012:+	circERC1-1	ERC1	hsa-miR-29b-3p	ENSG00000005889	ZFX	0
chr12-1328345	rs79543065	chr12_1263034_1290012:+	circERC1-1	ERC1	hsa-miR-29c-3p	ENSG00000005889	ZFX	0
chr12-1411392	rs80018118	chr12_1263034_1290012:+	circERC1-1	ERC1	hsa-miR-29a-3p	ENSG00000005889	ZFX	0
chr12-1411392	rs80018118	chr12_1263034_1290012:+	circERC1-1	ERC1	hsa-miR-29b-3p	ENSG00000005889	ZFX	0
chr12-1411392	rs80018118	chr12_1263034_1290012:+	circERC1-1	ERC1	hsa-miR-29c-3p	ENSG00000005889	ZFX	0
chr12-1420263	rs117601704	chr12_1263034_1290012:+	circERC1-1	ERC1	hsa-miR-29a-3p	ENSG00000005889	ZFX	0
chr12-1420263	rs117601704	chr12_1263034_1290012:+	circERC1-1	ERC1	hsa-miR-29b-3p	ENSG00000005889	ZFX	0
chr12-1420263	rs117601704	chr12_1263034_1290012:+	circERC1-1	ERC1	hsa-miR-29c-3p	ENSG00000005889	ZFX	0
chr12-1328345	rs79543065	chr12_1263034_1290012:+	circERC1-1	ERC1	hsa-miR-133a-3p	ENSG00000006468	ETV1	0
chr12-1328345	rs79543065	chr12_1263034_1290012:+	circERC1-1	ERC1	hsa-miR-133b	ENSG00000006468	ETV1	0
chr12-1411392	rs80018118	chr12_1263034_1290012:+	circERC1-1	ERC1	hsa-miR-133a-3p	ENSG00000006468	ETV1	0
chr12-1411392	rs80018118	chr12_1263034_1290012:+	circERC1-1	ERC1	hsa-miR-133b	ENSG00000006468	ETV1	0
chr12-1420263	rs117601704	chr12_1263034_1290012:+	circERC1-1	ERC1	hsa-miR-133a-3p	ENSG00000006468	ETV1	0
chr12-1420263	rs117601704	chr12_1263034_1290012:+	circERC1-1	ERC1	hsa-miR-133b	ENSG00000006468	ETV1	0
chr12-1328345	rs79543065	chr12_1263034_1290012:+	circERC1-1	ERC1	hsa-miR-133a-3p	ENSG00000007545	CRAMP1	0
chr12-1328345	rs79543065	chr12_1263034_1290012:+	circERC1-1	ERC1	hsa-miR-133b	ENSG00000007545	CRAMP1	0
chr12-1411392	rs80018118	chr12_1263034_1290012:+	circERC1-1	ERC1	hsa-miR-133a-3p	ENSG00000007545	CRAMP1	0
chr12-1411392	rs80018118	chr12_1263034_1290012:+	circERC1-1	ERC1	hsa-miR-133b	ENSG00000007545	CRAMP1	0
chr12-1420263	rs117601704	chr12_1263034_1290012:+	circERC1-1	ERC1	hsa-miR-133a-3p	ENSG00000007545	CRAMP1	0
chr12-1420263	rs117601704	chr12_1263034_1290012:+	circERC1-1	ERC1	hsa-miR-133b	ENSG00000007545	CRAMP1	0
chr12-1328345	rs79543065	chr12_1263034_1290012:+	circERC1-1	ERC1	hsa-miR-29a-3p	ENSG00000008083	JARID2	0
chr12-1328345	rs79543065	chr12_1263034_1290012:+	circERC1-1	ERC1	hsa-miR-29b-3p	ENSG00000008083	JARID2	0
chr12-1328345	rs79543065	chr12_1263034_1290012:+	circERC1-1	ERC1	hsa-miR-29c-3p	ENSG00000008083	JARID2	0
chr12-1411392	rs80018118	chr12_1263034_1290012:+	circERC1-1	ERC1	hsa-miR-29a-3p	ENSG00000008083	JARID2	0
chr12-1411392	rs80018118	chr12_1263034_1290012:+	circERC1-1	ERC1	hsa-miR-29b-3p	ENSG00000008083	JARID2	0
chr12-1411392	rs80018118	chr12_1263034_1290012:+	circERC1-1	ERC1	hsa-miR-29c-3p	ENSG00000008083	JARID2	0
chr12-1420263	rs117601704	chr12_1263034_1290012:+	circERC1-1	ERC1	hsa-miR-29a-3p	ENSG00000008083	JARID2	0
chr12-1420263	rs117601704	chr12_1263034_1290012:+	circERC1-1	ERC1	hsa-miR-29b-3p	ENSG00000008083	JARID2	0
chr12-1420263	rs117601704	chr12_1263034_1290012:+	circERC1-1	ERC1	hsa-miR-29c-3p	ENSG00000008083	JARID2	0
chr12-1328345	rs79543065	chr12_1263034_1290012:+	circERC1-1	ERC1	hsa-miR-29a-3p	ENSG00000008277	ADAM22	1
chr12-1328345	rs79543065	chr12_1263034_1290012:+	circERC1-1	ERC1	hsa-miR-29b-3p	ENSG00000008277	ADAM22	1
chr12-1328345	rs79543065	chr12_1263034_1290012:+	circERC1-1	ERC1	hsa-miR-29c-3p	ENSG00000008277	ADAM22	1
chr12-1411392	rs80018118	chr12_1263034_1290012:+	circERC1-1	ERC1	hsa-miR-29a-3p	ENSG00000008277	ADAM22	1
chr12-1411392	rs80018118	chr12_1263034_1290012:+	circERC1-1	ERC1	hsa-miR-29b-3p	ENSG00000008277	ADAM22	1
chr12-1411392	rs80018118	chr12_1263034_1290012:+	circERC1-1	ERC1	hsa-miR-29c-3p	ENSG00000008277	ADAM22	1
chr12-1420263	rs117601704	chr12_1263034_1290012:+	circERC1-1	ERC1	hsa-miR-29a-3p	ENSG00000008277	ADAM22	1
chr12-1420263	rs117601704	chr12_1263034_1290012:+	circERC1-1	ERC1	hsa-miR-29b-3p	ENSG00000008277	ADAM22	1
chr12-1420263	rs117601704	chr12_1263034_1290012:+	circERC1-1	ERC1	hsa-miR-29c-3p	ENSG00000008277	ADAM22	1
chr12-1328345	rs79543065	chr12_1263034_1290012:+	circERC1-1	ERC1	hsa-miR-29a-3p	ENSG00000009413	REV3L	0
chr12-1328345	rs79543065	chr12_1263034_1290012:+	circERC1-1	ERC1	hsa-miR-29b-3p	ENSG00000009413	REV3L	0
chr12-1328345	rs79543065	chr12_1263034_1290012:+	circERC1-1	ERC1	hsa-miR-29c-3p	ENSG00000009413	REV3L	0
chr12-1411392	rs80018118	chr12_1263034_1290012:+	circERC1-1	ERC1	hsa-miR-29a-3p	ENSG00000009413	REV3L	0
chr12-1411392	rs80018118	chr12_1263034_1290012:+	circERC1-1	ERC1	hsa-miR-29b-3p	ENSG00000009413	REV3L	0
chr12-1411392	rs80018118	chr12_1263034_1290012:+	circERC1-1	ERC1	hsa-miR-29c-3p	ENSG00000009413	REV3L	0
chr12-1420263	rs117601704	chr12_1263034_1290012:+	circERC1-1	ERC1	hsa-miR-29a-3p	ENSG00000009413	REV3L	0
chr12-1420263	rs117601704	chr12_1263034_1290012:+	circERC1-1	ERC1	hsa-miR-29b-3p	ENSG00000009413	REV3L	0
chr12-1420263	rs117601704	chr12_1263034_1290012:+	circERC1-1	ERC1	hsa-miR-29c-3p	ENSG00000009413	REV3L	0
chr12-1328345	rs79543065	chr12_1263034_1290012:+	circERC1-1	ERC1	hsa-miR-133a-3p	ENSG00000009694	TENM1	0
chr12-1328345	rs79543065	chr12_1263034_1290012:+	circERC1-1	ERC1	hsa-miR-133b	ENSG00000009694	TENM1	0
chr12-1411392	rs80018118	chr12_1263034_1290012:+	circERC1-1	ERC1	hsa-miR-133a-3p	ENSG00000009694	TENM1	0
chr12-1411392	rs80018118	chr12_1263034_1290012:+	circERC1-1	ERC1	hsa-miR-133b	ENSG00000009694	TENM1	0
chr12-1420263	rs117601704	chr12_1263034_1290012:+	circERC1-1	ERC1	hsa-miR-133a-3p	ENSG00000009694	TENM1	0
chr12-1420263	rs117601704	chr12_1263034_1290012:+	circERC1-1	ERC1	hsa-miR-133b	ENSG00000009694	TENM1	0
chr12-1328345	rs79543065	chr12_1263034_1290012:+	circERC1-1	ERC1	hsa-miR-29a-3p	ENSG00000010539	ZNF200	0
chr12-1328345	rs79543065	chr12_1263034_1290012:+	circERC1-1	ERC1	hsa-miR-29b-3p	ENSG00000010539	ZNF200	0
chr12-1328345	rs79543065	chr12_1263034_1290012:+	circERC1-1	ERC1	hsa-miR-29c-3p	ENSG00000010539	ZNF200	0
chr12-1411392	rs80018118	chr12_1263034_1290012:+	circERC1-1	ERC1	hsa-miR-29a-3p	ENSG00000010539	ZNF200	0
chr12-1411392	rs80018118	chr12_1263034_1290012:+	circERC1-1	ERC1	hsa-miR-29b-3p	ENSG00000010539	ZNF200	0
chr12-1411392	rs80018118	chr12_1263034_1290012:+	circERC1-1	ERC1	hsa-miR-29c-3p	ENSG00000010539	ZNF200	0
chr12-1420263	rs117601704	chr12_1263034_1290012:+	circERC1-1	ERC1	hsa-miR-29a-3p	ENSG00000010539	ZNF200	0
chr12-1420263	rs117601704	chr12_1263034_1290012:+	circERC1-1	ERC1	hsa-miR-29b-3p	ENSG00000010539	ZNF200	0
chr12-1420263	rs117601704	chr12_1263034_1290012:+	circERC1-1	ERC1	hsa-miR-29c-3p	ENSG00000010539	ZNF200	0
chr12-1328345	rs79543065	chr12_1263034_1290012:+	circERC1-1	ERC1	hsa-miR-29a-3p	ENSG00000011638	TMEM159	0
chr12-1328345	rs79543065	chr12_1263034_1290012:+	circERC1-1	ERC1	hsa-miR-29b-3p	ENSG00000011638	TMEM159	0
chr12-1328345	rs79543065	chr12_1263034_1290012:+	circERC1-1	ERC1	hsa-miR-29c-3p	ENSG00000011638	TMEM159	0
chr12-1411392	rs80018118	chr12_1263034_1290012:+	circERC1-1	ERC1	hsa-miR-29a-3p	ENSG00000011638	TMEM159	0
chr12-1411392	rs80018118	chr12_1263034_1290012:+	circERC1-1	ERC1	hsa-miR-29b-3p	ENSG00000011638	TMEM159	0
chr12-1411392	rs80018118	chr12_1263034_1290012:+	circERC1-1	ERC1	hsa-miR-29c-3p	ENSG00000011638	TMEM159	0
chr12-1420263	rs117601704	chr12_1263034_1290012:+	circERC1-1	ERC1	hsa-miR-29a-3p	ENSG00000011638	TMEM159	0
chr12-1420263	rs117601704	chr12_1263034_1290012:+	circERC1-1	ERC1	hsa-miR-29b-3p	ENSG00000011638	TMEM159	0
chr12-1420263	rs117601704	chr12_1263034_1290012:+	circERC1-1	ERC1	hsa-miR-29c-3p	ENSG00000011638	TMEM159	0
chr12-1328345	rs79543065	chr12_1263034_1290012:+	circERC1-1	ERC1	hsa-miR-133a-3p	ENSG00000019549	SNAI2	0
chr12-1328345	rs79543065	chr12_1263034_1290012:+	circERC1-1	ERC1	hsa-miR-133b	ENSG00000019549	SNAI2	0
chr12-1411392	rs80018118	chr12_1263034_1290012:+	circERC1-1	ERC1	hsa-miR-133a-3p	ENSG00000019549	SNAI2	0
chr12-1411392	rs80018118	chr12_1263034_1290012:+	circERC1-1	ERC1	hsa-miR-133b	ENSG00000019549	SNAI2	0
chr12-1420263	rs117601704	chr12_1263034_1290012:+	circERC1-1	ERC1	hsa-miR-133a-3p	ENSG00000019549	SNAI2	0
chr12-1420263	rs117601704	chr12_1263034_1290012:+	circERC1-1	ERC1	hsa-miR-133b	ENSG00000019549	SNAI2	0
chr12-1328345	rs79543065	chr12_1263034_1290012:+	circERC1-1	ERC1	hsa-miR-133a-3p	ENSG00000021776	AQR	0
chr12-1328345	rs79543065	chr12_1263034_1290012:+	circERC1-1	ERC1	hsa-miR-133b	ENSG00000021776	AQR	0
chr12-1411392	rs80018118	chr12_1263034_1290012:+	circERC1-1	ERC1	hsa-miR-133a-3p	ENSG00000021776	AQR	0
chr12-1411392	rs80018118	chr12_1263034_1290012:+	circERC1-1	ERC1	hsa-miR-133b	ENSG00000021776	AQR	0
chr12-1420263	rs117601704	chr12_1263034_1290012:+	circERC1-1	ERC1	hsa-miR-133a-3p	ENSG00000021776	AQR	0
chr12-1420263	rs117601704	chr12_1263034_1290012:+	circERC1-1	ERC1	hsa-miR-133b	ENSG00000021776	AQR	0
chr12-1328345	rs79543065	chr12_1263034_1290012:+	circERC1-1	ERC1	hsa-miR-29a-3p	ENSG00000029534	ANK1	0
chr12-1328345	rs79543065	chr12_1263034_1290012:+	circERC1-1	ERC1	hsa-miR-29b-3p	ENSG00000029534	ANK1	0
chr12-1328345	rs79543065	chr12_1263034_1290012:+	circERC1-1	ERC1	hsa-miR-29c-3p	ENSG00000029534	ANK1	0
chr12-1411392	rs80018118	chr12_1263034_1290012:+	circERC1-1	ERC1	hsa-miR-29a-3p	ENSG00000029534	ANK1	0
chr12-1411392	rs80018118	chr12_1263034_1290012:+	circERC1-1	ERC1	hsa-miR-29b-3p	ENSG00000029534	ANK1	0
chr12-1411392	rs80018118	chr12_1263034_1290012:+	circERC1-1	ERC1	hsa-miR-29c-3p	ENSG00000029534	ANK1	0
chr12-1420263	rs117601704	chr12_1263034_1290012:+	circERC1-1	ERC1	hsa-miR-29a-3p	ENSG00000029534	ANK1	0
chr12-1420263	rs117601704	chr12_1263034_1290012:+	circERC1-1	ERC1	hsa-miR-29b-3p	ENSG00000029534	ANK1	0
chr12-1420263	rs117601704	chr12_1263034_1290012:+	circERC1-1	ERC1	hsa-miR-29c-3p	ENSG00000029534	ANK1	0
chr12-1328345	rs79543065	chr12_1263034_1290012:+	circERC1-1	ERC1	hsa-miR-29a-3p	ENSG00000038295	TLL1	0
chr12-1328345	rs79543065	chr12_1263034_1290012:+	circERC1-1	ERC1	hsa-miR-29b-3p	ENSG00000038295	TLL1	0
chr12-1328345	rs79543065	chr12_1263034_1290012:+	circERC1-1	ERC1	hsa-miR-29c-3p	ENSG00000038295	TLL1	0
chr12-1411392	rs80018118	chr12_1263034_1290012:+	circERC1-1	ERC1	hsa-miR-29a-3p	ENSG00000038295	TLL1	0
chr12-1411392	rs80018118	chr12_1263034_1290012:+	circERC1-1	ERC1	hsa-miR-29b-3p	ENSG00000038295	TLL1	0
chr12-1411392	rs80018118	chr12_1263034_1290012:+	circERC1-1	ERC1	hsa-miR-29c-3p	ENSG00000038295	TLL1	0
chr12-1420263	rs117601704	chr12_1263034_1290012:+	circERC1-1	ERC1	hsa-miR-29a-3p	ENSG00000038295	TLL1	0
chr12-1420263	rs117601704	chr12_1263034_1290012:+	circERC1-1	ERC1	hsa-miR-29b-3p	ENSG00000038295	TLL1	0
chr12-1420263	rs117601704	chr12_1263034_1290012:+	circERC1-1	ERC1	hsa-miR-29c-3p	ENSG00000038295	TLL1	0
chr12-1328345	rs79543065	chr12_1263034_1290012:+	circERC1-1	ERC1	hsa-miR-29a-3p	ENSG00000047346	FAM214A	0
chr12-1328345	rs79543065	chr12_1263034_1290012:+	circERC1-1	ERC1	hsa-miR-29b-3p	ENSG00000047346	FAM214A	0
chr12-1328345	rs79543065	chr12_1263034_1290012:+	circERC1-1	ERC1	hsa-miR-29c-3p	ENSG00000047346	FAM214A	0
chr12-1411392	rs80018118	chr12_1263034_1290012:+	circERC1-1	ERC1	hsa-miR-29a-3p	ENSG00000047346	FAM214A	0
chr12-1411392	rs80018118	chr12_1263034_1290012:+	circERC1-1	ERC1	hsa-miR-29b-3p	ENSG00000047346	FAM214A	0
chr12-1411392	rs80018118	chr12_1263034_1290012:+	circERC1-1	ERC1	hsa-miR-29c-3p	ENSG00000047346	FAM214A	0
chr12-1420263	rs117601704	chr12_1263034_1290012:+	circERC1-1	ERC1	hsa-miR-29a-3p	ENSG00000047346	FAM214A	0
chr12-1420263	rs117601704	chr12_1263034_1290012:+	circERC1-1	ERC1	hsa-miR-29b-3p	ENSG00000047346	FAM214A	0
chr12-1420263	rs117601704	chr12_1263034_1290012:+	circERC1-1	ERC1	hsa-miR-29c-3p	ENSG00000047346	FAM214A	0
chr12-1328345	rs79543065	chr12_1263034_1290012:+	circERC1-1	ERC1	hsa-miR-29a-3p	ENSG00000049246	PER3	0
chr12-1328345	rs79543065	chr12_1263034_1290012:+	circERC1-1	ERC1	hsa-miR-29b-3p	ENSG00000049246	PER3	0
chr12-1328345	rs79543065	chr12_1263034_1290012:+	circERC1-1	ERC1	hsa-miR-29c-3p	ENSG00000049246	PER3	0
chr12-1411392	rs80018118	chr12_1263034_1290012:+	circERC1-1	ERC1	hsa-miR-29a-3p	ENSG00000049246	PER3	0
chr12-1411392	rs80018118	chr12_1263034_1290012:+	circERC1-1	ERC1	hsa-miR-29b-3p	ENSG00000049246	PER3	0
chr12-1411392	rs80018118	chr12_1263034_1290012:+	circERC1-1	ERC1	hsa-miR-29c-3p	ENSG00000049246	PER3	0
chr12-1420263	rs117601704	chr12_1263034_1290012:+	circERC1-1	ERC1	hsa-miR-29a-3p	ENSG00000049246	PER3	0
chr12-1420263	rs117601704	chr12_1263034_1290012:+	circERC1-1	ERC1	hsa-miR-29b-3p	ENSG00000049246	PER3	0
chr12-1420263	rs117601704	chr12_1263034_1290012:+	circERC1-1	ERC1	hsa-miR-29c-3p	ENSG00000049246	PER3	0
chr12-1328345	rs79543065	chr12_1263034_1290012:+	circERC1-1	ERC1	hsa-miR-29a-3p	ENSG00000050405	LIMA1	0
chr12-1328345	rs79543065	chr12_1263034_1290012:+	circERC1-1	ERC1	hsa-miR-29b-3p	ENSG00000050405	LIMA1	0
chr12-1328345	rs79543065	chr12_1263034_1290012:+	circERC1-1	ERC1	hsa-miR-29c-3p	ENSG00000050405	LIMA1	0
chr12-1411392	rs80018118	chr12_1263034_1290012:+	circERC1-1	ERC1	hsa-miR-29a-3p	ENSG00000050405	LIMA1	0
chr12-1411392	rs80018118	chr12_1263034_1290012:+	circERC1-1	ERC1	hsa-miR-29b-3p	ENSG00000050405	LIMA1	0
chr12-1411392	rs80018118	chr12_1263034_1290012:+	circERC1-1	ERC1	hsa-miR-29c-3p	ENSG00000050405	LIMA1	0
chr12-1420263	rs117601704	chr12_1263034_1290012:+	circERC1-1	ERC1	hsa-miR-29a-3p	ENSG00000050405	LIMA1	0
chr12-1420263	rs117601704	chr12_1263034_1290012:+	circERC1-1	ERC1	hsa-miR-29b-3p	ENSG00000050405	LIMA1	0
chr12-1420263	rs117601704	chr12_1263034_1290012:+	circERC1-1	ERC1	hsa-miR-29c-3p	ENSG00000050405	LIMA1	0
chr12-1328345	rs79543065	chr12_1263034_1290012:+	circERC1-1	ERC1	hsa-miR-133a-3p	ENSG00000053254	FOXN3	0
chr12-1328345	rs79543065	chr12_1263034_1290012:+	circERC1-1	ERC1	hsa-miR-133b	ENSG00000053254	FOXN3	0
chr12-1328345	rs79543065	chr12_1263034_1290012:+	circERC1-1	ERC1	hsa-miR-29a-3p	ENSG00000053254	FOXN3	0
chr12-1328345	rs79543065	chr12_1263034_1290012:+	circERC1-1	ERC1	hsa-miR-29b-3p	ENSG00000053254	FOXN3	0
chr12-1328345	rs79543065	chr12_1263034_1290012:+	circERC1-1	ERC1	hsa-miR-29c-3p	ENSG00000053254	FOXN3	0
chr12-1411392	rs80018118	chr12_1263034_1290012:+	circERC1-1	ERC1	hsa-miR-133a-3p	ENSG00000053254	FOXN3	0
chr12-1411392	rs80018118	chr12_1263034_1290012:+	circERC1-1	ERC1	hsa-miR-133b	ENSG00000053254	FOXN3	0
chr12-1411392	rs80018118	chr12_1263034_1290012:+	circERC1-1	ERC1	hsa-miR-29a-3p	ENSG00000053254	FOXN3	0
chr12-1411392	rs80018118	chr12_1263034_1290012:+	circERC1-1	ERC1	hsa-miR-29b-3p	ENSG00000053254	FOXN3	0
chr12-1411392	rs80018118	chr12_1263034_1290012:+	circERC1-1	ERC1	hsa-miR-29c-3p	ENSG00000053254	FOXN3	0
chr12-1420263	rs117601704	chr12_1263034_1290012:+	circERC1-1	ERC1	hsa-miR-133a-3p	ENSG00000053254	FOXN3	0
chr12-1420263	rs117601704	chr12_1263034_1290012:+	circERC1-1	ERC1	hsa-miR-133b	ENSG00000053254	FOXN3	0
chr12-1420263	rs117601704	chr12_1263034_1290012:+	circERC1-1	ERC1	hsa-miR-29a-3p	ENSG00000053254	FOXN3	0
chr12-1420263	rs117601704	chr12_1263034_1290012:+	circERC1-1	ERC1	hsa-miR-29b-3p	ENSG00000053254	FOXN3	0
chr12-1420263	rs117601704	chr12_1263034_1290012:+	circERC1-1	ERC1	hsa-miR-29c-3p	ENSG00000053254	FOXN3	0
chr12-1328345	rs79543065	chr12_1263034_1290012:+	circERC1-1	ERC1	hsa-miR-29a-3p	ENSG00000058085	LAMC2	0
chr12-1328345	rs79543065	chr12_1263034_1290012:+	circERC1-1	ERC1	hsa-miR-29b-3p	ENSG00000058085	LAMC2	0
chr12-1328345	rs79543065	chr12_1263034_1290012:+	circERC1-1	ERC1	hsa-miR-29c-3p	ENSG00000058085	LAMC2	0
chr12-1411392	rs80018118	chr12_1263034_1290012:+	circERC1-1	ERC1	hsa-miR-29a-3p	ENSG00000058085	LAMC2	0
chr12-1411392	rs80018118	chr12_1263034_1290012:+	circERC1-1	ERC1	hsa-miR-29b-3p	ENSG00000058085	LAMC2	0
chr12-1411392	rs80018118	chr12_1263034_1290012:+	circERC1-1	ERC1	hsa-miR-29c-3p	ENSG00000058085	LAMC2	0
chr12-1420263	rs117601704	chr12_1263034_1290012:+	circERC1-1	ERC1	hsa-miR-29a-3p	ENSG00000058085	LAMC2	0
chr12-1420263	rs117601704	chr12_1263034_1290012:+	circERC1-1	ERC1	hsa-miR-29b-3p	ENSG00000058085	LAMC2	0
chr12-1420263	rs117601704	chr12_1263034_1290012:+	circERC1-1	ERC1	hsa-miR-29c-3p	ENSG00000058085	LAMC2	0
chr12-1328345	rs79543065	chr12_1263034_1290012:+	circERC1-1	ERC1	hsa-miR-29a-3p	ENSG00000062370	ZNF112	0
chr12-1328345	rs79543065	chr12_1263034_1290012:+	circERC1-1	ERC1	hsa-miR-29b-3p	ENSG00000062370	ZNF112	0
chr12-1328345	rs79543065	chr12_1263034_1290012:+	circERC1-1	ERC1	hsa-miR-29c-3p	ENSG00000062370	ZNF112	0
chr12-1411392	rs80018118	chr12_1263034_1290012:+	circERC1-1	ERC1	hsa-miR-29a-3p	ENSG00000062370	ZNF112	0
chr12-1411392	rs80018118	chr12_1263034_1290012:+	circERC1-1	ERC1	hsa-miR-29b-3p	ENSG00000062370	ZNF112	0
chr12-1411392	rs80018118	chr12_1263034_1290012:+	circERC1-1	ERC1	hsa-miR-29c-3p	ENSG00000062370	ZNF112	0
chr12-1420263	rs117601704	chr12_1263034_1290012:+	circERC1-1	ERC1	hsa-miR-29a-3p	ENSG00000062370	ZNF112	0
chr12-1420263	rs117601704	chr12_1263034_1290012:+	circERC1-1	ERC1	hsa-miR-29b-3p	ENSG00000062370	ZNF112	0
chr12-1420263	rs117601704	chr12_1263034_1290012:+	circERC1-1	ERC1	hsa-miR-29c-3p	ENSG00000062370	ZNF112	0
chr12-1328345	rs79543065	chr12_1263034_1290012:+	circERC1-1	ERC1	hsa-miR-29a-3p	ENSG00000064309	CDON	0
chr12-1328345	rs79543065	chr12_1263034_1290012:+	circERC1-1	ERC1	hsa-miR-29b-3p	ENSG00000064309	CDON	0
chr12-1328345	rs79543065	chr12_1263034_1290012:+	circERC1-1	ERC1	hsa-miR-29c-3p	ENSG00000064309	CDON	0
chr12-1411392	rs80018118	chr12_1263034_1290012:+	circERC1-1	ERC1	hsa-miR-29a-3p	ENSG00000064309	CDON	0
chr12-1411392	rs80018118	chr12_1263034_1290012:+	circERC1-1	ERC1	hsa-miR-29b-3p	ENSG00000064309	CDON	0
chr12-1411392	rs80018118	chr12_1263034_1290012:+	circERC1-1	ERC1	hsa-miR-29c-3p	ENSG00000064309	CDON	0
chr12-1420263	rs117601704	chr12_1263034_1290012:+	circERC1-1	ERC1	hsa-miR-29a-3p	ENSG00000064309	CDON	0
chr12-1420263	rs117601704	chr12_1263034_1290012:+	circERC1-1	ERC1	hsa-miR-29b-3p	ENSG00000064309	CDON	0
chr12-1420263	rs117601704	chr12_1263034_1290012:+	circERC1-1	ERC1	hsa-miR-29c-3p	ENSG00000064309	CDON	0
chr12-1328345	rs79543065	chr12_1263034_1290012:+	circERC1-1	ERC1	hsa-miR-133a-3p	ENSG00000068745	IP6K2	0
chr12-1328345	rs79543065	chr12_1263034_1290012:+	circERC1-1	ERC1	hsa-miR-133b	ENSG00000068745	IP6K2	0
chr12-1411392	rs80018118	chr12_1263034_1290012:+	circERC1-1	ERC1	hsa-miR-133a-3p	ENSG00000068745	IP6K2	0
chr12-1411392	rs80018118	chr12_1263034_1290012:+	circERC1-1	ERC1	hsa-miR-133b	ENSG00000068745	IP6K2	0
chr12-1420263	rs117601704	chr12_1263034_1290012:+	circERC1-1	ERC1	hsa-miR-133a-3p	ENSG00000068745	IP6K2	0
chr12-1420263	rs117601704	chr12_1263034_1290012:+	circERC1-1	ERC1	hsa-miR-133b	ENSG00000068745	IP6K2	0
chr12-1328345	rs79543065	chr12_1263034_1290012:+	circERC1-1	ERC1	hsa-miR-29a-3p	ENSG00000069667	RORA	0
chr12-1328345	rs79543065	chr12_1263034_1290012:+	circERC1-1	ERC1	hsa-miR-29b-3p	ENSG00000069667	RORA	0
chr12-1328345	rs79543065	chr12_1263034_1290012:+	circERC1-1	ERC1	hsa-miR-29c-3p	ENSG00000069667	RORA	0
chr12-1411392	rs80018118	chr12_1263034_1290012:+	circERC1-1	ERC1	hsa-miR-29a-3p	ENSG00000069667	RORA	0
chr12-1411392	rs80018118	chr12_1263034_1290012:+	circERC1-1	ERC1	hsa-miR-29b-3p	ENSG00000069667	RORA	0
chr12-1411392	rs80018118	chr12_1263034_1290012:+	circERC1-1	ERC1	hsa-miR-29c-3p	ENSG00000069667	RORA	0
chr12-1420263	rs117601704	chr12_1263034_1290012:+	circERC1-1	ERC1	hsa-miR-29a-3p	ENSG00000069667	RORA	0
chr12-1420263	rs117601704	chr12_1263034_1290012:+	circERC1-1	ERC1	hsa-miR-29b-3p	ENSG00000069667	RORA	0
chr12-1420263	rs117601704	chr12_1263034_1290012:+	circERC1-1	ERC1	hsa-miR-29c-3p	ENSG00000069667	RORA	0
chr12-1328345	rs79543065	chr12_1263034_1290012:+	circERC1-1	ERC1	hsa-miR-29a-3p	ENSG00000070540	WIPI1	0
chr12-1328345	rs79543065	chr12_1263034_1290012:+	circERC1-1	ERC1	hsa-miR-29b-3p	ENSG00000070540	WIPI1	0
chr12-1328345	rs79543065	chr12_1263034_1290012:+	circERC1-1	ERC1	hsa-miR-29c-3p	ENSG00000070540	WIPI1	0
chr12-1411392	rs80018118	chr12_1263034_1290012:+	circERC1-1	ERC1	hsa-miR-29a-3p	ENSG00000070540	WIPI1	0
chr12-1411392	rs80018118	chr12_1263034_1290012:+	circERC1-1	ERC1	hsa-miR-29b-3p	ENSG00000070540	WIPI1	0
chr12-1411392	rs80018118	chr12_1263034_1290012:+	circERC1-1	ERC1	hsa-miR-29c-3p	ENSG00000070540	WIPI1	0
chr12-1420263	rs117601704	chr12_1263034_1290012:+	circERC1-1	ERC1	hsa-miR-29a-3p	ENSG00000070540	WIPI1	0
chr12-1420263	rs117601704	chr12_1263034_1290012:+	circERC1-1	ERC1	hsa-miR-29b-3p	ENSG00000070540	WIPI1	0
chr12-1420263	rs117601704	chr12_1263034_1290012:+	circERC1-1	ERC1	hsa-miR-29c-3p	ENSG00000070540	WIPI1	0
chr12-1328345	rs79543065	chr12_1263034_1290012:+	circERC1-1	ERC1	hsa-miR-29a-3p	ENSG00000071243	ING3	0
chr12-1328345	rs79543065	chr12_1263034_1290012:+	circERC1-1	ERC1	hsa-miR-29b-3p	ENSG00000071243	ING3	0
chr12-1328345	rs79543065	chr12_1263034_1290012:+	circERC1-1	ERC1	hsa-miR-29c-3p	ENSG00000071243	ING3	0
chr12-1411392	rs80018118	chr12_1263034_1290012:+	circERC1-1	ERC1	hsa-miR-29a-3p	ENSG00000071243	ING3	0
chr12-1411392	rs80018118	chr12_1263034_1290012:+	circERC1-1	ERC1	hsa-miR-29b-3p	ENSG00000071243	ING3	0
chr12-1411392	rs80018118	chr12_1263034_1290012:+	circERC1-1	ERC1	hsa-miR-29c-3p	ENSG00000071243	ING3	0
chr12-1420263	rs117601704	chr12_1263034_1290012:+	circERC1-1	ERC1	hsa-miR-29a-3p	ENSG00000071243	ING3	0
chr12-1420263	rs117601704	chr12_1263034_1290012:+	circERC1-1	ERC1	hsa-miR-29b-3p	ENSG00000071243	ING3	0
chr12-1420263	rs117601704	chr12_1263034_1290012:+	circERC1-1	ERC1	hsa-miR-29c-3p	ENSG00000071243	ING3	0
chr12-1328345	rs79543065	chr12_1263034_1290012:+	circERC1-1	ERC1	hsa-miR-29a-3p	ENSG00000072422	RHOBTB1	0
chr12-1328345	rs79543065	chr12_1263034_1290012:+	circERC1-1	ERC1	hsa-miR-29b-3p	ENSG00000072422	RHOBTB1	0
chr12-1328345	rs79543065	chr12_1263034_1290012:+	circERC1-1	ERC1	hsa-miR-29c-3p	ENSG00000072422	RHOBTB1	0
chr12-1411392	rs80018118	chr12_1263034_1290012:+	circERC1-1	ERC1	hsa-miR-29a-3p	ENSG00000072422	RHOBTB1	0
chr12-1411392	rs80018118	chr12_1263034_1290012:+	circERC1-1	ERC1	hsa-miR-29b-3p	ENSG00000072422	RHOBTB1	0
chr12-1411392	rs80018118	chr12_1263034_1290012:+	circERC1-1	ERC1	hsa-miR-29c-3p	ENSG00000072422	RHOBTB1	0
chr12-1328345	rs79543065	chr12_1263034_1290012:+	circERC1-1	ERC1	hsa-miR-29a-3p	ENSG00000072786	STK10	0
chr12-1328345	rs79543065	chr12_1263034_1290012:+	circERC1-1	ERC1	hsa-miR-29b-3p	ENSG00000072786	STK10	0
chr12-1328345	rs79543065	chr12_1263034_1290012:+	circERC1-1	ERC1	hsa-miR-29c-3p	ENSG00000072786	STK10	0
chr12-1411392	rs80018118	chr12_1263034_1290012:+	circERC1-1	ERC1	hsa-miR-29a-3p	ENSG00000072786	STK10	0
chr12-1411392	rs80018118	chr12_1263034_1290012:+	circERC1-1	ERC1	hsa-miR-29b-3p	ENSG00000072786	STK10	0
chr12-1411392	rs80018118	chr12_1263034_1290012:+	circERC1-1	ERC1	hsa-miR-29c-3p	ENSG00000072786	STK10	0
chr12-1420263	rs117601704	chr12_1263034_1290012:+	circERC1-1	ERC1	hsa-miR-29a-3p	ENSG00000072786	STK10	0
chr12-1420263	rs117601704	chr12_1263034_1290012:+	circERC1-1	ERC1	hsa-miR-29b-3p	ENSG00000072786	STK10	0
chr12-1420263	rs117601704	chr12_1263034_1290012:+	circERC1-1	ERC1	hsa-miR-29c-3p	ENSG00000072786	STK10	0
chr12-1328345	rs79543065	chr12_1263034_1290012:+	circERC1-1	ERC1	hsa-miR-29a-3p	ENSG00000072858	SIDT1	0
chr12-1328345	rs79543065	chr12_1263034_1290012:+	circERC1-1	ERC1	hsa-miR-29b-3p	ENSG00000072858	SIDT1	0
chr12-1328345	rs79543065	chr12_1263034_1290012:+	circERC1-1	ERC1	hsa-miR-29c-3p	ENSG00000072858	SIDT1	0
chr12-1411392	rs80018118	chr12_1263034_1290012:+	circERC1-1	ERC1	hsa-miR-29a-3p	ENSG00000072858	SIDT1	0
chr12-1411392	rs80018118	chr12_1263034_1290012:+	circERC1-1	ERC1	hsa-miR-29b-3p	ENSG00000072858	SIDT1	0
chr12-1411392	rs80018118	chr12_1263034_1290012:+	circERC1-1	ERC1	hsa-miR-29c-3p	ENSG00000072858	SIDT1	0
chr12-1420263	rs117601704	chr12_1263034_1290012:+	circERC1-1	ERC1	hsa-miR-29a-3p	ENSG00000072858	SIDT1	0
chr12-1420263	rs117601704	chr12_1263034_1290012:+	circERC1-1	ERC1	hsa-miR-29b-3p	ENSG00000072858	SIDT1	0
chr12-1420263	rs117601704	chr12_1263034_1290012:+	circERC1-1	ERC1	hsa-miR-29c-3p	ENSG00000072858	SIDT1	0
chr12-1328345	rs79543065	chr12_1263034_1290012:+	circERC1-1	ERC1	hsa-miR-133a-3p	ENSG00000073792	IGF2BP2	0
chr12-1328345	rs79543065	chr12_1263034_1290012:+	circERC1-1	ERC1	hsa-miR-133b	ENSG00000073792	IGF2BP2	0
chr12-1411392	rs80018118	chr12_1263034_1290012:+	circERC1-1	ERC1	hsa-miR-133a-3p	ENSG00000073792	IGF2BP2	0
chr12-1411392	rs80018118	chr12_1263034_1290012:+	circERC1-1	ERC1	hsa-miR-133b	ENSG00000073792	IGF2BP2	0
chr12-1420263	rs117601704	chr12_1263034_1290012:+	circERC1-1	ERC1	hsa-miR-133a-3p	ENSG00000073792	IGF2BP2	0
chr12-1420263	rs117601704	chr12_1263034_1290012:+	circERC1-1	ERC1	hsa-miR-133b	ENSG00000073792	IGF2BP2	0
chr12-1328345	rs79543065	chr12_1263034_1290012:+	circERC1-1	ERC1	hsa-miR-133a-3p	ENSG00000074370	ATP2A3	0
chr12-1328345	rs79543065	chr12_1263034_1290012:+	circERC1-1	ERC1	hsa-miR-133b	ENSG00000074370	ATP2A3	0
chr12-1411392	rs80018118	chr12_1263034_1290012:+	circERC1-1	ERC1	hsa-miR-133a-3p	ENSG00000074370	ATP2A3	0
chr12-1411392	rs80018118	chr12_1263034_1290012:+	circERC1-1	ERC1	hsa-miR-133b	ENSG00000074370	ATP2A3	0
chr12-1420263	rs117601704	chr12_1263034_1290012:+	circERC1-1	ERC1	hsa-miR-133a-3p	ENSG00000074370	ATP2A3	0
chr12-1420263	rs117601704	chr12_1263034_1290012:+	circERC1-1	ERC1	hsa-miR-133b	ENSG00000074370	ATP2A3	0
chr12-1328345	rs79543065	chr12_1263034_1290012:+	circERC1-1	ERC1	hsa-miR-29a-3p	ENSG00000076641	PAG1	0
chr12-1328345	rs79543065	chr12_1263034_1290012:+	circERC1-1	ERC1	hsa-miR-29b-3p	ENSG00000076641	PAG1	0
chr12-1328345	rs79543065	chr12_1263034_1290012:+	circERC1-1	ERC1	hsa-miR-29c-3p	ENSG00000076641	PAG1	0
chr12-1411392	rs80018118	chr12_1263034_1290012:+	circERC1-1	ERC1	hsa-miR-29a-3p	ENSG00000076641	PAG1	0
chr12-1411392	rs80018118	chr12_1263034_1290012:+	circERC1-1	ERC1	hsa-miR-29b-3p	ENSG00000076641	PAG1	0
chr12-1411392	rs80018118	chr12_1263034_1290012:+	circERC1-1	ERC1	hsa-miR-29c-3p	ENSG00000076641	PAG1	0
chr12-1420263	rs117601704	chr12_1263034_1290012:+	circERC1-1	ERC1	hsa-miR-29a-3p	ENSG00000076641	PAG1	0
chr12-1420263	rs117601704	chr12_1263034_1290012:+	circERC1-1	ERC1	hsa-miR-29b-3p	ENSG00000076641	PAG1	0
chr12-1420263	rs117601704	chr12_1263034_1290012:+	circERC1-1	ERC1	hsa-miR-29c-3p	ENSG00000076641	PAG1	0
chr12-1328345	rs79543065	chr12_1263034_1290012:+	circERC1-1	ERC1	hsa-miR-29a-3p	ENSG00000077044	DGKD	0
chr12-1328345	rs79543065	chr12_1263034_1290012:+	circERC1-1	ERC1	hsa-miR-29b-3p	ENSG00000077044	DGKD	0
chr12-1328345	rs79543065	chr12_1263034_1290012:+	circERC1-1	ERC1	hsa-miR-29c-3p	ENSG00000077044	DGKD	0
chr12-1411392	rs80018118	chr12_1263034_1290012:+	circERC1-1	ERC1	hsa-miR-29a-3p	ENSG00000077044	DGKD	0
chr12-1411392	rs80018118	chr12_1263034_1290012:+	circERC1-1	ERC1	hsa-miR-29b-3p	ENSG00000077044	DGKD	0
chr12-1411392	rs80018118	chr12_1263034_1290012:+	circERC1-1	ERC1	hsa-miR-29c-3p	ENSG00000077044	DGKD	0
chr12-1420263	rs117601704	chr12_1263034_1290012:+	circERC1-1	ERC1	hsa-miR-29a-3p	ENSG00000077044	DGKD	0
chr12-1420263	rs117601704	chr12_1263034_1290012:+	circERC1-1	ERC1	hsa-miR-29b-3p	ENSG00000077044	DGKD	0
chr12-1420263	rs117601704	chr12_1263034_1290012:+	circERC1-1	ERC1	hsa-miR-29c-3p	ENSG00000077044	DGKD	0
chr12-1328345	rs79543065	chr12_1263034_1290012:+	circERC1-1	ERC1	hsa-miR-133a-3p	ENSG00000077782	FGFR1	0
chr12-1328345	rs79543065	chr12_1263034_1290012:+	circERC1-1	ERC1	hsa-miR-133b	ENSG00000077782	FGFR1	0
chr12-1411392	rs80018118	chr12_1263034_1290012:+	circERC1-1	ERC1	hsa-miR-133a-3p	ENSG00000077782	FGFR1	0
chr12-1411392	rs80018118	chr12_1263034_1290012:+	circERC1-1	ERC1	hsa-miR-133b	ENSG00000077782	FGFR1	0
chr12-1420263	rs117601704	chr12_1263034_1290012:+	circERC1-1	ERC1	hsa-miR-133a-3p	ENSG00000077782	FGFR1	0
chr12-1420263	rs117601704	chr12_1263034_1290012:+	circERC1-1	ERC1	hsa-miR-133b	ENSG00000077782	FGFR1	0
chr12-1328345	rs79543065	chr12_1263034_1290012:+	circERC1-1	ERC1	hsa-miR-29a-3p	ENSG00000078114	NEBL	0
chr12-1328345	rs79543065	chr12_1263034_1290012:+	circERC1-1	ERC1	hsa-miR-29b-3p	ENSG00000078114	NEBL	0
chr12-1328345	rs79543065	chr12_1263034_1290012:+	circERC1-1	ERC1	hsa-miR-29c-3p	ENSG00000078114	NEBL	0
chr12-1411392	rs80018118	chr12_1263034_1290012:+	circERC1-1	ERC1	hsa-miR-29a-3p	ENSG00000078114	NEBL	0
chr12-1411392	rs80018118	chr12_1263034_1290012:+	circERC1-1	ERC1	hsa-miR-29b-3p	ENSG00000078114	NEBL	0
chr12-1411392	rs80018118	chr12_1263034_1290012:+	circERC1-1	ERC1	hsa-miR-29c-3p	ENSG00000078114	NEBL	0
chr12-1420263	rs117601704	chr12_1263034_1290012:+	circERC1-1	ERC1	hsa-miR-29a-3p	ENSG00000078114	NEBL	0
chr12-1420263	rs117601704	chr12_1263034_1290012:+	circERC1-1	ERC1	hsa-miR-29b-3p	ENSG00000078114	NEBL	0
chr12-1420263	rs117601704	chr12_1263034_1290012:+	circERC1-1	ERC1	hsa-miR-29c-3p	ENSG00000078114	NEBL	0
chr12-1328345	rs79543065	chr12_1263034_1290012:+	circERC1-1	ERC1	hsa-miR-29a-3p	ENSG00000079102	RUNX1T1	0
chr12-1328345	rs79543065	chr12_1263034_1290012:+	circERC1-1	ERC1	hsa-miR-29b-3p	ENSG00000079102	RUNX1T1	0
chr12-1328345	rs79543065	chr12_1263034_1290012:+	circERC1-1	ERC1	hsa-miR-29c-3p	ENSG00000079102	RUNX1T1	0
chr12-1411392	rs80018118	chr12_1263034_1290012:+	circERC1-1	ERC1	hsa-miR-29a-3p	ENSG00000079102	RUNX1T1	0
chr12-1411392	rs80018118	chr12_1263034_1290012:+	circERC1-1	ERC1	hsa-miR-29b-3p	ENSG00000079102	RUNX1T1	0
chr12-1411392	rs80018118	chr12_1263034_1290012:+	circERC1-1	ERC1	hsa-miR-29c-3p	ENSG00000079102	RUNX1T1	0
chr12-1420263	rs117601704	chr12_1263034_1290012:+	circERC1-1	ERC1	hsa-miR-29a-3p	ENSG00000079102	RUNX1T1	0
chr12-1420263	rs117601704	chr12_1263034_1290012:+	circERC1-1	ERC1	hsa-miR-29b-3p	ENSG00000079102	RUNX1T1	0
chr12-1420263	rs117601704	chr12_1263034_1290012:+	circERC1-1	ERC1	hsa-miR-29c-3p	ENSG00000079102	RUNX1T1	0
chr12-1328345	rs79543065	chr12_1263034_1290012:+	circERC1-1	ERC1	hsa-miR-133b	ENSG00000088179	PTPN4	0
chr12-1411392	rs80018118	chr12_1263034_1290012:+	circERC1-1	ERC1	hsa-miR-133b	ENSG00000088179	PTPN4	0
chr12-1420263	rs117601704	chr12_1263034_1290012:+	circERC1-1	ERC1	hsa-miR-133b	ENSG00000088179	PTPN4	0
chr12-1328345	rs79543065	chr12_1263034_1290012:+	circERC1-1	ERC1	hsa-miR-133a-3p	ENSG00000095539	SEMA4G	0
chr12-1328345	rs79543065	chr12_1263034_1290012:+	circERC1-1	ERC1	hsa-miR-133b	ENSG00000095539	SEMA4G	0
chr12-1411392	rs80018118	chr12_1263034_1290012:+	circERC1-1	ERC1	hsa-miR-133a-3p	ENSG00000095539	SEMA4G	0
chr12-1411392	rs80018118	chr12_1263034_1290012:+	circERC1-1	ERC1	hsa-miR-133b	ENSG00000095539	SEMA4G	0
chr12-1420263	rs117601704	chr12_1263034_1290012:+	circERC1-1	ERC1	hsa-miR-133a-3p	ENSG00000095539	SEMA4G	0
chr12-1420263	rs117601704	chr12_1263034_1290012:+	circERC1-1	ERC1	hsa-miR-133b	ENSG00000095539	SEMA4G	0
chr12-1328345	rs79543065	chr12_1263034_1290012:+	circERC1-1	ERC1	hsa-miR-133a-3p	ENSG00000099204	ABLIM1	0
chr12-1328345	rs79543065	chr12_1263034_1290012:+	circERC1-1	ERC1	hsa-miR-133b	ENSG00000099204	ABLIM1	0
chr12-1328345	rs79543065	chr12_1263034_1290012:+	circERC1-1	ERC1	hsa-miR-29a-3p	ENSG00000099204	ABLIM1	0
chr12-1328345	rs79543065	chr12_1263034_1290012:+	circERC1-1	ERC1	hsa-miR-29b-3p	ENSG00000099204	ABLIM1	0
chr12-1328345	rs79543065	chr12_1263034_1290012:+	circERC1-1	ERC1	hsa-miR-29c-3p	ENSG00000099204	ABLIM1	0
chr12-1411392	rs80018118	chr12_1263034_1290012:+	circERC1-1	ERC1	hsa-miR-133a-3p	ENSG00000099204	ABLIM1	0
chr12-1411392	rs80018118	chr12_1263034_1290012:+	circERC1-1	ERC1	hsa-miR-133b	ENSG00000099204	ABLIM1	0
chr12-1411392	rs80018118	chr12_1263034_1290012:+	circERC1-1	ERC1	hsa-miR-29a-3p	ENSG00000099204	ABLIM1	0
chr12-1411392	rs80018118	chr12_1263034_1290012:+	circERC1-1	ERC1	hsa-miR-29b-3p	ENSG00000099204	ABLIM1	0
chr12-1411392	rs80018118	chr12_1263034_1290012:+	circERC1-1	ERC1	hsa-miR-29c-3p	ENSG00000099204	ABLIM1	0
chr12-1420263	rs117601704	chr12_1263034_1290012:+	circERC1-1	ERC1	hsa-miR-133a-3p	ENSG00000099204	ABLIM1	0
chr12-1420263	rs117601704	chr12_1263034_1290012:+	circERC1-1	ERC1	hsa-miR-133b	ENSG00000099204	ABLIM1	0
chr12-1420263	rs117601704	chr12_1263034_1290012:+	circERC1-1	ERC1	hsa-miR-29a-3p	ENSG00000099204	ABLIM1	0
chr12-1420263	rs117601704	chr12_1263034_1290012:+	circERC1-1	ERC1	hsa-miR-29b-3p	ENSG00000099204	ABLIM1	0
chr12-1420263	rs117601704	chr12_1263034_1290012:+	circERC1-1	ERC1	hsa-miR-29c-3p	ENSG00000099204	ABLIM1	0
chr12-1328345	rs79543065	chr12_1263034_1290012:+	circERC1-1	ERC1	hsa-miR-133a-3p	ENSG00000099284	H2AFY2	0
chr12-1328345	rs79543065	chr12_1263034_1290012:+	circERC1-1	ERC1	hsa-miR-133b	ENSG00000099284	H2AFY2	0
chr12-1328345	rs79543065	chr12_1263034_1290012:+	circERC1-1	ERC1	hsa-miR-29a-3p	ENSG00000099284	H2AFY2	0
chr12-1328345	rs79543065	chr12_1263034_1290012:+	circERC1-1	ERC1	hsa-miR-29b-3p	ENSG00000099284	H2AFY2	0
chr12-1328345	rs79543065	chr12_1263034_1290012:+	circERC1-1	ERC1	hsa-miR-29c-3p	ENSG00000099284	H2AFY2	0
chr12-1411392	rs80018118	chr12_1263034_1290012:+	circERC1-1	ERC1	hsa-miR-133a-3p	ENSG00000099284	H2AFY2	0
chr12-1411392	rs80018118	chr12_1263034_1290012:+	circERC1-1	ERC1	hsa-miR-133b	ENSG00000099284	H2AFY2	0
chr12-1411392	rs80018118	chr12_1263034_1290012:+	circERC1-1	ERC1	hsa-miR-29a-3p	ENSG00000099284	H2AFY2	0
chr12-1411392	rs80018118	chr12_1263034_1290012:+	circERC1-1	ERC1	hsa-miR-29b-3p	ENSG00000099284	H2AFY2	0
chr12-1411392	rs80018118	chr12_1263034_1290012:+	circERC1-1	ERC1	hsa-miR-29c-3p	ENSG00000099284	H2AFY2	0
chr12-1420263	rs117601704	chr12_1263034_1290012:+	circERC1-1	ERC1	hsa-miR-133a-3p	ENSG00000099284	H2AFY2	0
chr12-1420263	rs117601704	chr12_1263034_1290012:+	circERC1-1	ERC1	hsa-miR-133b	ENSG00000099284	H2AFY2	0
chr12-1420263	rs117601704	chr12_1263034_1290012:+	circERC1-1	ERC1	hsa-miR-29a-3p	ENSG00000099284	H2AFY2	0
chr12-1420263	rs117601704	chr12_1263034_1290012:+	circERC1-1	ERC1	hsa-miR-29b-3p	ENSG00000099284	H2AFY2	0
chr12-1420263	rs117601704	chr12_1263034_1290012:+	circERC1-1	ERC1	hsa-miR-29c-3p	ENSG00000099284	H2AFY2	0
chr12-1328345	rs79543065	chr12_1263034_1290012:+	circERC1-1	ERC1	hsa-miR-29a-3p	ENSG00000099889	ARVCF	0
chr12-1328345	rs79543065	chr12_1263034_1290012:+	circERC1-1	ERC1	hsa-miR-29b-3p	ENSG00000099889	ARVCF	0
chr12-1328345	rs79543065	chr12_1263034_1290012:+	circERC1-1	ERC1	hsa-miR-29c-3p	ENSG00000099889	ARVCF	0
chr12-1411392	rs80018118	chr12_1263034_1290012:+	circERC1-1	ERC1	hsa-miR-29a-3p	ENSG00000099889	ARVCF	0
chr12-1411392	rs80018118	chr12_1263034_1290012:+	circERC1-1	ERC1	hsa-miR-29b-3p	ENSG00000099889	ARVCF	0
chr12-1411392	rs80018118	chr12_1263034_1290012:+	circERC1-1	ERC1	hsa-miR-29c-3p	ENSG00000099889	ARVCF	0
chr12-1420263	rs117601704	chr12_1263034_1290012:+	circERC1-1	ERC1	hsa-miR-29a-3p	ENSG00000099889	ARVCF	0
chr12-1420263	rs117601704	chr12_1263034_1290012:+	circERC1-1	ERC1	hsa-miR-29b-3p	ENSG00000099889	ARVCF	0
chr12-1420263	rs117601704	chr12_1263034_1290012:+	circERC1-1	ERC1	hsa-miR-29c-3p	ENSG00000099889	ARVCF	0
chr12-1328345	rs79543065	chr12_1263034_1290012:+	circERC1-1	ERC1	hsa-miR-29a-3p	ENSG00000099954	CECR2	0
chr12-1328345	rs79543065	chr12_1263034_1290012:+	circERC1-1	ERC1	hsa-miR-29b-3p	ENSG00000099954	CECR2	0
chr12-1328345	rs79543065	chr12_1263034_1290012:+	circERC1-1	ERC1	hsa-miR-29c-3p	ENSG00000099954	CECR2	0
chr12-1411392	rs80018118	chr12_1263034_1290012:+	circERC1-1	ERC1	hsa-miR-29a-3p	ENSG00000099954	CECR2	0
chr12-1411392	rs80018118	chr12_1263034_1290012:+	circERC1-1	ERC1	hsa-miR-29b-3p	ENSG00000099954	CECR2	0
chr12-1411392	rs80018118	chr12_1263034_1290012:+	circERC1-1	ERC1	hsa-miR-29c-3p	ENSG00000099954	CECR2	0
chr12-1420263	rs117601704	chr12_1263034_1290012:+	circERC1-1	ERC1	hsa-miR-29a-3p	ENSG00000099954	CECR2	0
chr12-1420263	rs117601704	chr12_1263034_1290012:+	circERC1-1	ERC1	hsa-miR-29b-3p	ENSG00000099954	CECR2	0
chr12-1420263	rs117601704	chr12_1263034_1290012:+	circERC1-1	ERC1	hsa-miR-29c-3p	ENSG00000099954	CECR2	0
chr12-1328345	rs79543065	chr12_1263034_1290012:+	circERC1-1	ERC1	hsa-miR-133a-3p	ENSG00000100441	KHNYN	0
chr12-1328345	rs79543065	chr12_1263034_1290012:+	circERC1-1	ERC1	hsa-miR-133b	ENSG00000100441	KHNYN	0
chr12-1328345	rs79543065	chr12_1263034_1290012:+	circERC1-1	ERC1	hsa-miR-29a-3p	ENSG00000100441	KHNYN	0
chr12-1328345	rs79543065	chr12_1263034_1290012:+	circERC1-1	ERC1	hsa-miR-29b-3p	ENSG00000100441	KHNYN	0
chr12-1328345	rs79543065	chr12_1263034_1290012:+	circERC1-1	ERC1	hsa-miR-29c-3p	ENSG00000100441	KHNYN	0
chr12-1411392	rs80018118	chr12_1263034_1290012:+	circERC1-1	ERC1	hsa-miR-133a-3p	ENSG00000100441	KHNYN	0
chr12-1411392	rs80018118	chr12_1263034_1290012:+	circERC1-1	ERC1	hsa-miR-133b	ENSG00000100441	KHNYN	0
chr12-1411392	rs80018118	chr12_1263034_1290012:+	circERC1-1	ERC1	hsa-miR-29a-3p	ENSG00000100441	KHNYN	0
chr12-1411392	rs80018118	chr12_1263034_1290012:+	circERC1-1	ERC1	hsa-miR-29b-3p	ENSG00000100441	KHNYN	0
chr12-1411392	rs80018118	chr12_1263034_1290012:+	circERC1-1	ERC1	hsa-miR-29c-3p	ENSG00000100441	KHNYN	0
chr12-1420263	rs117601704	chr12_1263034_1290012:+	circERC1-1	ERC1	hsa-miR-133a-3p	ENSG00000100441	KHNYN	0
chr12-1420263	rs117601704	chr12_1263034_1290012:+	circERC1-1	ERC1	hsa-miR-133b	ENSG00000100441	KHNYN	0
chr12-1420263	rs117601704	chr12_1263034_1290012:+	circERC1-1	ERC1	hsa-miR-29a-3p	ENSG00000100441	KHNYN	0
chr12-1420263	rs117601704	chr12_1263034_1290012:+	circERC1-1	ERC1	hsa-miR-29b-3p	ENSG00000100441	KHNYN	0
chr12-1420263	rs117601704	chr12_1263034_1290012:+	circERC1-1	ERC1	hsa-miR-29c-3p	ENSG00000100441	KHNYN	0
chr12-1328345	rs79543065	chr12_1263034_1290012:+	circERC1-1	ERC1	hsa-miR-29a-3p	ENSG00000100647	SUSD6	0
chr12-1328345	rs79543065	chr12_1263034_1290012:+	circERC1-1	ERC1	hsa-miR-29b-3p	ENSG00000100647	SUSD6	0
chr12-1328345	rs79543065	chr12_1263034_1290012:+	circERC1-1	ERC1	hsa-miR-29c-3p	ENSG00000100647	SUSD6	0
chr12-1411392	rs80018118	chr12_1263034_1290012:+	circERC1-1	ERC1	hsa-miR-29a-3p	ENSG00000100647	SUSD6	0
chr12-1411392	rs80018118	chr12_1263034_1290012:+	circERC1-1	ERC1	hsa-miR-29b-3p	ENSG00000100647	SUSD6	0
chr12-1411392	rs80018118	chr12_1263034_1290012:+	circERC1-1	ERC1	hsa-miR-29c-3p	ENSG00000100647	SUSD6	0
chr12-1420263	rs117601704	chr12_1263034_1290012:+	circERC1-1	ERC1	hsa-miR-29a-3p	ENSG00000100647	SUSD6	0
chr12-1420263	rs117601704	chr12_1263034_1290012:+	circERC1-1	ERC1	hsa-miR-29b-3p	ENSG00000100647	SUSD6	0
chr12-1420263	rs117601704	chr12_1263034_1290012:+	circERC1-1	ERC1	hsa-miR-29c-3p	ENSG00000100647	SUSD6	0
chr12-1328345	rs79543065	chr12_1263034_1290012:+	circERC1-1	ERC1	hsa-miR-29a-3p	ENSG00000101004	NINL	0
chr12-1328345	rs79543065	chr12_1263034_1290012:+	circERC1-1	ERC1	hsa-miR-29b-3p	ENSG00000101004	NINL	0
chr12-1328345	rs79543065	chr12_1263034_1290012:+	circERC1-1	ERC1	hsa-miR-29c-3p	ENSG00000101004	NINL	0
chr12-1411392	rs80018118	chr12_1263034_1290012:+	circERC1-1	ERC1	hsa-miR-29a-3p	ENSG00000101004	NINL	0
chr12-1411392	rs80018118	chr12_1263034_1290012:+	circERC1-1	ERC1	hsa-miR-29b-3p	ENSG00000101004	NINL	0
chr12-1411392	rs80018118	chr12_1263034_1290012:+	circERC1-1	ERC1	hsa-miR-29c-3p	ENSG00000101004	NINL	0
chr12-1420263	rs117601704	chr12_1263034_1290012:+	circERC1-1	ERC1	hsa-miR-29a-3p	ENSG00000101004	NINL	0
chr12-1420263	rs117601704	chr12_1263034_1290012:+	circERC1-1	ERC1	hsa-miR-29b-3p	ENSG00000101004	NINL	0
chr12-1420263	rs117601704	chr12_1263034_1290012:+	circERC1-1	ERC1	hsa-miR-29c-3p	ENSG00000101004	NINL	0
chr12-1328345	rs79543065	chr12_1263034_1290012:+	circERC1-1	ERC1	hsa-miR-29a-3p	ENSG00000101624	CEP76	0
chr12-1328345	rs79543065	chr12_1263034_1290012:+	circERC1-1	ERC1	hsa-miR-29b-3p	ENSG00000101624	CEP76	0
chr12-1328345	rs79543065	chr12_1263034_1290012:+	circERC1-1	ERC1	hsa-miR-29c-3p	ENSG00000101624	CEP76	0
chr12-1411392	rs80018118	chr12_1263034_1290012:+	circERC1-1	ERC1	hsa-miR-29a-3p	ENSG00000101624	CEP76	0
chr12-1411392	rs80018118	chr12_1263034_1290012:+	circERC1-1	ERC1	hsa-miR-29b-3p	ENSG00000101624	CEP76	0
chr12-1411392	rs80018118	chr12_1263034_1290012:+	circERC1-1	ERC1	hsa-miR-29c-3p	ENSG00000101624	CEP76	0
chr12-1420263	rs117601704	chr12_1263034_1290012:+	circERC1-1	ERC1	hsa-miR-29a-3p	ENSG00000101624	CEP76	0
chr12-1420263	rs117601704	chr12_1263034_1290012:+	circERC1-1	ERC1	hsa-miR-29b-3p	ENSG00000101624	CEP76	0
chr12-1420263	rs117601704	chr12_1263034_1290012:+	circERC1-1	ERC1	hsa-miR-29c-3p	ENSG00000101624	CEP76	0
chr12-1328345	rs79543065	chr12_1263034_1290012:+	circERC1-1	ERC1	hsa-miR-29a-3p	ENSG00000101752	MIB1	0
chr12-1328345	rs79543065	chr12_1263034_1290012:+	circERC1-1	ERC1	hsa-miR-29b-3p	ENSG00000101752	MIB1	0
chr12-1328345	rs79543065	chr12_1263034_1290012:+	circERC1-1	ERC1	hsa-miR-29c-3p	ENSG00000101752	MIB1	0
chr12-1411392	rs80018118	chr12_1263034_1290012:+	circERC1-1	ERC1	hsa-miR-29a-3p	ENSG00000101752	MIB1	0
chr12-1411392	rs80018118	chr12_1263034_1290012:+	circERC1-1	ERC1	hsa-miR-29b-3p	ENSG00000101752	MIB1	0
chr12-1411392	rs80018118	chr12_1263034_1290012:+	circERC1-1	ERC1	hsa-miR-29c-3p	ENSG00000101752	MIB1	0
chr12-1420263	rs117601704	chr12_1263034_1290012:+	circERC1-1	ERC1	hsa-miR-29a-3p	ENSG00000101752	MIB1	0
chr12-1420263	rs117601704	chr12_1263034_1290012:+	circERC1-1	ERC1	hsa-miR-29b-3p	ENSG00000101752	MIB1	0
chr12-1420263	rs117601704	chr12_1263034_1290012:+	circERC1-1	ERC1	hsa-miR-29c-3p	ENSG00000101752	MIB1	0
chr12-1328345	rs79543065	chr12_1263034_1290012:+	circERC1-1	ERC1	hsa-miR-133a-3p	ENSG00000101871	MID1	0
chr12-1328345	rs79543065	chr12_1263034_1290012:+	circERC1-1	ERC1	hsa-miR-133b	ENSG00000101871	MID1	0
chr12-1411392	rs80018118	chr12_1263034_1290012:+	circERC1-1	ERC1	hsa-miR-133a-3p	ENSG00000101871	MID1	0
chr12-1411392	rs80018118	chr12_1263034_1290012:+	circERC1-1	ERC1	hsa-miR-133b	ENSG00000101871	MID1	0
chr12-1420263	rs117601704	chr12_1263034_1290012:+	circERC1-1	ERC1	hsa-miR-133a-3p	ENSG00000101871	MID1	0
chr12-1420263	rs117601704	chr12_1263034_1290012:+	circERC1-1	ERC1	hsa-miR-133b	ENSG00000101871	MID1	0
chr12-1328345	rs79543065	chr12_1263034_1290012:+	circERC1-1	ERC1	hsa-miR-29a-3p	ENSG00000103264	FBXO31	0
chr12-1328345	rs79543065	chr12_1263034_1290012:+	circERC1-1	ERC1	hsa-miR-29b-3p	ENSG00000103264	FBXO31	0
chr12-1328345	rs79543065	chr12_1263034_1290012:+	circERC1-1	ERC1	hsa-miR-29c-3p	ENSG00000103264	FBXO31	0
chr12-1411392	rs80018118	chr12_1263034_1290012:+	circERC1-1	ERC1	hsa-miR-29a-3p	ENSG00000103264	FBXO31	0
chr12-1411392	rs80018118	chr12_1263034_1290012:+	circERC1-1	ERC1	hsa-miR-29b-3p	ENSG00000103264	FBXO31	0
chr12-1411392	rs80018118	chr12_1263034_1290012:+	circERC1-1	ERC1	hsa-miR-29c-3p	ENSG00000103264	FBXO31	0
chr12-1420263	rs117601704	chr12_1263034_1290012:+	circERC1-1	ERC1	hsa-miR-29a-3p	ENSG00000103264	FBXO31	0
chr12-1420263	rs117601704	chr12_1263034_1290012:+	circERC1-1	ERC1	hsa-miR-29b-3p	ENSG00000103264	FBXO31	0
chr12-1420263	rs117601704	chr12_1263034_1290012:+	circERC1-1	ERC1	hsa-miR-29c-3p	ENSG00000103264	FBXO31	0
chr12-1328345	rs79543065	chr12_1263034_1290012:+	circERC1-1	ERC1	hsa-miR-133a-3p	ENSG00000110047	EHD1	0
chr12-1328345	rs79543065	chr12_1263034_1290012:+	circERC1-1	ERC1	hsa-miR-133b	ENSG00000110047	EHD1	0
chr12-1411392	rs80018118	chr12_1263034_1290012:+	circERC1-1	ERC1	hsa-miR-133a-3p	ENSG00000110047	EHD1	0
chr12-1411392	rs80018118	chr12_1263034_1290012:+	circERC1-1	ERC1	hsa-miR-133b	ENSG00000110047	EHD1	0
chr12-1420263	rs117601704	chr12_1263034_1290012:+	circERC1-1	ERC1	hsa-miR-133a-3p	ENSG00000110047	EHD1	0
chr12-1420263	rs117601704	chr12_1263034_1290012:+	circERC1-1	ERC1	hsa-miR-133b	ENSG00000110047	EHD1	0
chr12-1328345	rs79543065	chr12_1263034_1290012:+	circERC1-1	ERC1	hsa-miR-29a-3p	ENSG00000110066	KMT5B	0
chr12-1328345	rs79543065	chr12_1263034_1290012:+	circERC1-1	ERC1	hsa-miR-29b-3p	ENSG00000110066	KMT5B	0
chr12-1328345	rs79543065	chr12_1263034_1290012:+	circERC1-1	ERC1	hsa-miR-29c-3p	ENSG00000110066	KMT5B	0
chr12-1411392	rs80018118	chr12_1263034_1290012:+	circERC1-1	ERC1	hsa-miR-29a-3p	ENSG00000110066	KMT5B	0
chr12-1411392	rs80018118	chr12_1263034_1290012:+	circERC1-1	ERC1	hsa-miR-29b-3p	ENSG00000110066	KMT5B	0
chr12-1411392	rs80018118	chr12_1263034_1290012:+	circERC1-1	ERC1	hsa-miR-29c-3p	ENSG00000110066	KMT5B	0
chr12-1420263	rs117601704	chr12_1263034_1290012:+	circERC1-1	ERC1	hsa-miR-29a-3p	ENSG00000110066	KMT5B	0
chr12-1420263	rs117601704	chr12_1263034_1290012:+	circERC1-1	ERC1	hsa-miR-29b-3p	ENSG00000110066	KMT5B	0
chr12-1420263	rs117601704	chr12_1263034_1290012:+	circERC1-1	ERC1	hsa-miR-29c-3p	ENSG00000110066	KMT5B	0
chr12-1328345	rs79543065	chr12_1263034_1290012:+	circERC1-1	ERC1	hsa-miR-133a-3p	ENSG00000111846	GCNT2	0
chr12-1328345	rs79543065	chr12_1263034_1290012:+	circERC1-1	ERC1	hsa-miR-133b	ENSG00000111846	GCNT2	0
chr12-1328345	rs79543065	chr12_1263034_1290012:+	circERC1-1	ERC1	hsa-miR-29a-3p	ENSG00000111846	GCNT2	0
chr12-1328345	rs79543065	chr12_1263034_1290012:+	circERC1-1	ERC1	hsa-miR-29b-3p	ENSG00000111846	GCNT2	0
chr12-1328345	rs79543065	chr12_1263034_1290012:+	circERC1-1	ERC1	hsa-miR-29c-3p	ENSG00000111846	GCNT2	0
chr12-1411392	rs80018118	chr12_1263034_1290012:+	circERC1-1	ERC1	hsa-miR-133a-3p	ENSG00000111846	GCNT2	0
chr12-1411392	rs80018118	chr12_1263034_1290012:+	circERC1-1	ERC1	hsa-miR-133b	ENSG00000111846	GCNT2	0
chr12-1411392	rs80018118	chr12_1263034_1290012:+	circERC1-1	ERC1	hsa-miR-29a-3p	ENSG00000111846	GCNT2	0
chr12-1411392	rs80018118	chr12_1263034_1290012:+	circERC1-1	ERC1	hsa-miR-29b-3p	ENSG00000111846	GCNT2	0
chr12-1411392	rs80018118	chr12_1263034_1290012:+	circERC1-1	ERC1	hsa-miR-29c-3p	ENSG00000111846	GCNT2	0
chr12-1420263	rs117601704	chr12_1263034_1290012:+	circERC1-1	ERC1	hsa-miR-133a-3p	ENSG00000111846	GCNT2	0
chr12-1420263	rs117601704	chr12_1263034_1290012:+	circERC1-1	ERC1	hsa-miR-133b	ENSG00000111846	GCNT2	0
chr12-1420263	rs117601704	chr12_1263034_1290012:+	circERC1-1	ERC1	hsa-miR-29a-3p	ENSG00000111846	GCNT2	0
chr12-1420263	rs117601704	chr12_1263034_1290012:+	circERC1-1	ERC1	hsa-miR-29b-3p	ENSG00000111846	GCNT2	0
chr12-1420263	rs117601704	chr12_1263034_1290012:+	circERC1-1	ERC1	hsa-miR-29c-3p	ENSG00000111846	GCNT2	0
chr12-1328345	rs79543065	chr12_1263034_1290012:+	circERC1-1	ERC1	hsa-miR-29b-3p	ENSG00000112763	BTN2A1	0
chr12-1411392	rs80018118	chr12_1263034_1290012:+	circERC1-1	ERC1	hsa-miR-29b-3p	ENSG00000112763	BTN2A1	0
chr12-1420263	rs117601704	chr12_1263034_1290012:+	circERC1-1	ERC1	hsa-miR-29b-3p	ENSG00000112763	BTN2A1	0
chr12-1328345	rs79543065	chr12_1263034_1290012:+	circERC1-1	ERC1	hsa-miR-29a-3p	ENSG00000113300	CNOT6	0
chr12-1328345	rs79543065	chr12_1263034_1290012:+	circERC1-1	ERC1	hsa-miR-29b-3p	ENSG00000113300	CNOT6	0
chr12-1328345	rs79543065	chr12_1263034_1290012:+	circERC1-1	ERC1	hsa-miR-29c-3p	ENSG00000113300	CNOT6	0
chr12-1411392	rs80018118	chr12_1263034_1290012:+	circERC1-1	ERC1	hsa-miR-29a-3p	ENSG00000113300	CNOT6	0
chr12-1411392	rs80018118	chr12_1263034_1290012:+	circERC1-1	ERC1	hsa-miR-29b-3p	ENSG00000113300	CNOT6	0
chr12-1411392	rs80018118	chr12_1263034_1290012:+	circERC1-1	ERC1	hsa-miR-29c-3p	ENSG00000113300	CNOT6	0
chr12-1420263	rs117601704	chr12_1263034_1290012:+	circERC1-1	ERC1	hsa-miR-29a-3p	ENSG00000113300	CNOT6	0
chr12-1420263	rs117601704	chr12_1263034_1290012:+	circERC1-1	ERC1	hsa-miR-29b-3p	ENSG00000113300	CNOT6	0
chr12-1420263	rs117601704	chr12_1263034_1290012:+	circERC1-1	ERC1	hsa-miR-29c-3p	ENSG00000113300	CNOT6	0
chr12-1328345	rs79543065	chr12_1263034_1290012:+	circERC1-1	ERC1	hsa-miR-133a-3p	ENSG00000114098	ARMC8	0
chr12-1328345	rs79543065	chr12_1263034_1290012:+	circERC1-1	ERC1	hsa-miR-133b	ENSG00000114098	ARMC8	0
chr12-1328345	rs79543065	chr12_1263034_1290012:+	circERC1-1	ERC1	hsa-miR-29a-3p	ENSG00000114098	ARMC8	0
chr12-1328345	rs79543065	chr12_1263034_1290012:+	circERC1-1	ERC1	hsa-miR-29b-3p	ENSG00000114098	ARMC8	0
chr12-1328345	rs79543065	chr12_1263034_1290012:+	circERC1-1	ERC1	hsa-miR-29c-3p	ENSG00000114098	ARMC8	0
chr12-1411392	rs80018118	chr12_1263034_1290012:+	circERC1-1	ERC1	hsa-miR-133a-3p	ENSG00000114098	ARMC8	0
chr12-1411392	rs80018118	chr12_1263034_1290012:+	circERC1-1	ERC1	hsa-miR-133b	ENSG00000114098	ARMC8	0
chr12-1411392	rs80018118	chr12_1263034_1290012:+	circERC1-1	ERC1	hsa-miR-29a-3p	ENSG00000114098	ARMC8	0
chr12-1411392	rs80018118	chr12_1263034_1290012:+	circERC1-1	ERC1	hsa-miR-29b-3p	ENSG00000114098	ARMC8	0
chr12-1411392	rs80018118	chr12_1263034_1290012:+	circERC1-1	ERC1	hsa-miR-29c-3p	ENSG00000114098	ARMC8	0
chr12-1420263	rs117601704	chr12_1263034_1290012:+	circERC1-1	ERC1	hsa-miR-133a-3p	ENSG00000114098	ARMC8	0
chr12-1420263	rs117601704	chr12_1263034_1290012:+	circERC1-1	ERC1	hsa-miR-133b	ENSG00000114098	ARMC8	0
chr12-1420263	rs117601704	chr12_1263034_1290012:+	circERC1-1	ERC1	hsa-miR-29a-3p	ENSG00000114098	ARMC8	0
chr12-1420263	rs117601704	chr12_1263034_1290012:+	circERC1-1	ERC1	hsa-miR-29b-3p	ENSG00000114098	ARMC8	0
chr12-1420263	rs117601704	chr12_1263034_1290012:+	circERC1-1	ERC1	hsa-miR-29c-3p	ENSG00000114098	ARMC8	0
chr12-1328345	rs79543065	chr12_1263034_1290012:+	circERC1-1	ERC1	hsa-miR-133b	ENSG00000114491	UMPS	0
chr12-1328345	rs79543065	chr12_1263034_1290012:+	circERC1-1	ERC1	hsa-miR-29a-3p	ENSG00000114491	UMPS	0
chr12-1328345	rs79543065	chr12_1263034_1290012:+	circERC1-1	ERC1	hsa-miR-29b-3p	ENSG00000114491	UMPS	0
chr12-1328345	rs79543065	chr12_1263034_1290012:+	circERC1-1	ERC1	hsa-miR-29c-3p	ENSG00000114491	UMPS	0
chr12-1411392	rs80018118	chr12_1263034_1290012:+	circERC1-1	ERC1	hsa-miR-133b	ENSG00000114491	UMPS	0
chr12-1411392	rs80018118	chr12_1263034_1290012:+	circERC1-1	ERC1	hsa-miR-29a-3p	ENSG00000114491	UMPS	0
chr12-1411392	rs80018118	chr12_1263034_1290012:+	circERC1-1	ERC1	hsa-miR-29b-3p	ENSG00000114491	UMPS	0
chr12-1411392	rs80018118	chr12_1263034_1290012:+	circERC1-1	ERC1	hsa-miR-29c-3p	ENSG00000114491	UMPS	0
chr12-1420263	rs117601704	chr12_1263034_1290012:+	circERC1-1	ERC1	hsa-miR-133b	ENSG00000114491	UMPS	0
chr12-1420263	rs117601704	chr12_1263034_1290012:+	circERC1-1	ERC1	hsa-miR-29a-3p	ENSG00000114491	UMPS	0
chr12-1420263	rs117601704	chr12_1263034_1290012:+	circERC1-1	ERC1	hsa-miR-29b-3p	ENSG00000114491	UMPS	0
chr12-1420263	rs117601704	chr12_1263034_1290012:+	circERC1-1	ERC1	hsa-miR-29c-3p	ENSG00000114491	UMPS	0
chr12-1328345	rs79543065	chr12_1263034_1290012:+	circERC1-1	ERC1	hsa-miR-133a-3p	ENSG00000117461	PIK3R3	0
chr12-1328345	rs79543065	chr12_1263034_1290012:+	circERC1-1	ERC1	hsa-miR-133b	ENSG00000117461	PIK3R3	0
chr12-1328345	rs79543065	chr12_1263034_1290012:+	circERC1-1	ERC1	hsa-miR-29a-3p	ENSG00000117461	PIK3R3	0
chr12-1328345	rs79543065	chr12_1263034_1290012:+	circERC1-1	ERC1	hsa-miR-29b-3p	ENSG00000117461	PIK3R3	0
chr12-1328345	rs79543065	chr12_1263034_1290012:+	circERC1-1	ERC1	hsa-miR-29c-3p	ENSG00000117461	PIK3R3	0
chr12-1411392	rs80018118	chr12_1263034_1290012:+	circERC1-1	ERC1	hsa-miR-133a-3p	ENSG00000117461	PIK3R3	0
chr12-1411392	rs80018118	chr12_1263034_1290012:+	circERC1-1	ERC1	hsa-miR-133b	ENSG00000117461	PIK3R3	0
chr12-1411392	rs80018118	chr12_1263034_1290012:+	circERC1-1	ERC1	hsa-miR-29a-3p	ENSG00000117461	PIK3R3	0
chr12-1411392	rs80018118	chr12_1263034_1290012:+	circERC1-1	ERC1	hsa-miR-29b-3p	ENSG00000117461	PIK3R3	0
chr12-1411392	rs80018118	chr12_1263034_1290012:+	circERC1-1	ERC1	hsa-miR-29c-3p	ENSG00000117461	PIK3R3	0
chr12-1420263	rs117601704	chr12_1263034_1290012:+	circERC1-1	ERC1	hsa-miR-133a-3p	ENSG00000117461	PIK3R3	0
chr12-1420263	rs117601704	chr12_1263034_1290012:+	circERC1-1	ERC1	hsa-miR-133b	ENSG00000117461	PIK3R3	0
chr12-1420263	rs117601704	chr12_1263034_1290012:+	circERC1-1	ERC1	hsa-miR-29a-3p	ENSG00000117461	PIK3R3	0
chr12-1420263	rs117601704	chr12_1263034_1290012:+	circERC1-1	ERC1	hsa-miR-29b-3p	ENSG00000117461	PIK3R3	0
chr12-1420263	rs117601704	chr12_1263034_1290012:+	circERC1-1	ERC1	hsa-miR-29c-3p	ENSG00000117461	PIK3R3	0
chr12-1328345	rs79543065	chr12_1263034_1290012:+	circERC1-1	ERC1	hsa-miR-133a-3p	ENSG00000117682	DHDDS	0
chr12-1328345	rs79543065	chr12_1263034_1290012:+	circERC1-1	ERC1	hsa-miR-133b	ENSG00000117682	DHDDS	0
chr12-1328345	rs79543065	chr12_1263034_1290012:+	circERC1-1	ERC1	hsa-miR-29a-3p	ENSG00000117682	DHDDS	0
chr12-1328345	rs79543065	chr12_1263034_1290012:+	circERC1-1	ERC1	hsa-miR-29b-3p	ENSG00000117682	DHDDS	0
chr12-1328345	rs79543065	chr12_1263034_1290012:+	circERC1-1	ERC1	hsa-miR-29c-3p	ENSG00000117682	DHDDS	0
chr12-1411392	rs80018118	chr12_1263034_1290012:+	circERC1-1	ERC1	hsa-miR-133a-3p	ENSG00000117682	DHDDS	0
chr12-1411392	rs80018118	chr12_1263034_1290012:+	circERC1-1	ERC1	hsa-miR-133b	ENSG00000117682	DHDDS	0
chr12-1411392	rs80018118	chr12_1263034_1290012:+	circERC1-1	ERC1	hsa-miR-29a-3p	ENSG00000117682	DHDDS	0
chr12-1411392	rs80018118	chr12_1263034_1290012:+	circERC1-1	ERC1	hsa-miR-29b-3p	ENSG00000117682	DHDDS	0
chr12-1411392	rs80018118	chr12_1263034_1290012:+	circERC1-1	ERC1	hsa-miR-29c-3p	ENSG00000117682	DHDDS	0
chr12-1420263	rs117601704	chr12_1263034_1290012:+	circERC1-1	ERC1	hsa-miR-133a-3p	ENSG00000117682	DHDDS	0
chr12-1420263	rs117601704	chr12_1263034_1290012:+	circERC1-1	ERC1	hsa-miR-133b	ENSG00000117682	DHDDS	0
chr12-1420263	rs117601704	chr12_1263034_1290012:+	circERC1-1	ERC1	hsa-miR-29a-3p	ENSG00000117682	DHDDS	0
chr12-1420263	rs117601704	chr12_1263034_1290012:+	circERC1-1	ERC1	hsa-miR-29b-3p	ENSG00000117682	DHDDS	0
chr12-1420263	rs117601704	chr12_1263034_1290012:+	circERC1-1	ERC1	hsa-miR-29c-3p	ENSG00000117682	DHDDS	0
chr12-1328345	rs79543065	chr12_1263034_1290012:+	circERC1-1	ERC1	hsa-miR-133a-3p	ENSG00000118242	MREG	0
chr12-1328345	rs79543065	chr12_1263034_1290012:+	circERC1-1	ERC1	hsa-miR-133b	ENSG00000118242	MREG	0
chr12-1411392	rs80018118	chr12_1263034_1290012:+	circERC1-1	ERC1	hsa-miR-133a-3p	ENSG00000118242	MREG	0
chr12-1411392	rs80018118	chr12_1263034_1290012:+	circERC1-1	ERC1	hsa-miR-133b	ENSG00000118242	MREG	0
chr12-1420263	rs117601704	chr12_1263034_1290012:+	circERC1-1	ERC1	hsa-miR-133a-3p	ENSG00000118242	MREG	0
chr12-1420263	rs117601704	chr12_1263034_1290012:+	circERC1-1	ERC1	hsa-miR-133b	ENSG00000118242	MREG	0
chr12-1328345	rs79543065	chr12_1263034_1290012:+	circERC1-1	ERC1	hsa-miR-133a-3p	ENSG00000118655	DCLRE1B	0
chr12-1328345	rs79543065	chr12_1263034_1290012:+	circERC1-1	ERC1	hsa-miR-133b	ENSG00000118655	DCLRE1B	0
chr12-1411392	rs80018118	chr12_1263034_1290012:+	circERC1-1	ERC1	hsa-miR-133a-3p	ENSG00000118655	DCLRE1B	0
chr12-1411392	rs80018118	chr12_1263034_1290012:+	circERC1-1	ERC1	hsa-miR-133b	ENSG00000118655	DCLRE1B	0
chr12-1420263	rs117601704	chr12_1263034_1290012:+	circERC1-1	ERC1	hsa-miR-133a-3p	ENSG00000118655	DCLRE1B	0
chr12-1420263	rs117601704	chr12_1263034_1290012:+	circERC1-1	ERC1	hsa-miR-133b	ENSG00000118655	DCLRE1B	0
chr12-1328345	rs79543065	chr12_1263034_1290012:+	circERC1-1	ERC1	hsa-miR-133a-3p	ENSG00000119969	HELLS	0
chr12-1328345	rs79543065	chr12_1263034_1290012:+	circERC1-1	ERC1	hsa-miR-133b	ENSG00000119969	HELLS	0
chr12-1411392	rs80018118	chr12_1263034_1290012:+	circERC1-1	ERC1	hsa-miR-133a-3p	ENSG00000119969	HELLS	0
chr12-1411392	rs80018118	chr12_1263034_1290012:+	circERC1-1	ERC1	hsa-miR-133b	ENSG00000119969	HELLS	0
chr12-1420263	rs117601704	chr12_1263034_1290012:+	circERC1-1	ERC1	hsa-miR-133a-3p	ENSG00000119969	HELLS	0
chr12-1420263	rs117601704	chr12_1263034_1290012:+	circERC1-1	ERC1	hsa-miR-133b	ENSG00000119969	HELLS	0
chr12-1328345	rs79543065	chr12_1263034_1290012:+	circERC1-1	ERC1	hsa-miR-133a-3p	ENSG00000120149	MSX2	0
chr12-1328345	rs79543065	chr12_1263034_1290012:+	circERC1-1	ERC1	hsa-miR-133b	ENSG00000120149	MSX2	0
chr12-1411392	rs80018118	chr12_1263034_1290012:+	circERC1-1	ERC1	hsa-miR-133a-3p	ENSG00000120149	MSX2	0
chr12-1411392	rs80018118	chr12_1263034_1290012:+	circERC1-1	ERC1	hsa-miR-133b	ENSG00000120149	MSX2	0
chr12-1420263	rs117601704	chr12_1263034_1290012:+	circERC1-1	ERC1	hsa-miR-133a-3p	ENSG00000120149	MSX2	0
chr12-1420263	rs117601704	chr12_1263034_1290012:+	circERC1-1	ERC1	hsa-miR-133b	ENSG00000120149	MSX2	0
chr12-1328345	rs79543065	chr12_1263034_1290012:+	circERC1-1	ERC1	hsa-miR-29a-3p	ENSG00000120254	MTHFD1L	0
chr12-1328345	rs79543065	chr12_1263034_1290012:+	circERC1-1	ERC1	hsa-miR-29b-3p	ENSG00000120254	MTHFD1L	0
chr12-1328345	rs79543065	chr12_1263034_1290012:+	circERC1-1	ERC1	hsa-miR-29c-3p	ENSG00000120254	MTHFD1L	0
chr12-1411392	rs80018118	chr12_1263034_1290012:+	circERC1-1	ERC1	hsa-miR-29a-3p	ENSG00000120254	MTHFD1L	0
chr12-1411392	rs80018118	chr12_1263034_1290012:+	circERC1-1	ERC1	hsa-miR-29b-3p	ENSG00000120254	MTHFD1L	0
chr12-1411392	rs80018118	chr12_1263034_1290012:+	circERC1-1	ERC1	hsa-miR-29c-3p	ENSG00000120254	MTHFD1L	0
chr12-1420263	rs117601704	chr12_1263034_1290012:+	circERC1-1	ERC1	hsa-miR-29a-3p	ENSG00000120254	MTHFD1L	0
chr12-1420263	rs117601704	chr12_1263034_1290012:+	circERC1-1	ERC1	hsa-miR-29b-3p	ENSG00000120254	MTHFD1L	0
chr12-1420263	rs117601704	chr12_1263034_1290012:+	circERC1-1	ERC1	hsa-miR-29c-3p	ENSG00000120254	MTHFD1L	0
chr12-1328345	rs79543065	chr12_1263034_1290012:+	circERC1-1	ERC1	hsa-miR-29a-3p	ENSG00000121310	ECHDC2	0
chr12-1328345	rs79543065	chr12_1263034_1290012:+	circERC1-1	ERC1	hsa-miR-29b-3p	ENSG00000121310	ECHDC2	0
chr12-1328345	rs79543065	chr12_1263034_1290012:+	circERC1-1	ERC1	hsa-miR-29c-3p	ENSG00000121310	ECHDC2	0
chr12-1411392	rs80018118	chr12_1263034_1290012:+	circERC1-1	ERC1	hsa-miR-29a-3p	ENSG00000121310	ECHDC2	0
chr12-1411392	rs80018118	chr12_1263034_1290012:+	circERC1-1	ERC1	hsa-miR-29b-3p	ENSG00000121310	ECHDC2	0
chr12-1411392	rs80018118	chr12_1263034_1290012:+	circERC1-1	ERC1	hsa-miR-29c-3p	ENSG00000121310	ECHDC2	0
chr12-1420263	rs117601704	chr12_1263034_1290012:+	circERC1-1	ERC1	hsa-miR-29a-3p	ENSG00000121310	ECHDC2	0
chr12-1420263	rs117601704	chr12_1263034_1290012:+	circERC1-1	ERC1	hsa-miR-29b-3p	ENSG00000121310	ECHDC2	0
chr12-1420263	rs117601704	chr12_1263034_1290012:+	circERC1-1	ERC1	hsa-miR-29c-3p	ENSG00000121310	ECHDC2	0
chr12-1411392	rs80018118	chr12_1263034_1290012:+	circERC1-1	ERC1	hsa-miR-133a-3p	ENSG00000121644	DESI2	0
chr12-1411392	rs80018118	chr12_1263034_1290012:+	circERC1-1	ERC1	hsa-miR-133b	ENSG00000121644	DESI2	0
chr12-1420263	rs117601704	chr12_1263034_1290012:+	circERC1-1	ERC1	hsa-miR-133a-3p	ENSG00000121644	DESI2	0
chr12-1420263	rs117601704	chr12_1263034_1290012:+	circERC1-1	ERC1	hsa-miR-133b	ENSG00000121644	DESI2	0
chr12-1328345	rs79543065	chr12_1263034_1290012:+	circERC1-1	ERC1	hsa-miR-29a-3p	ENSG00000123643	SLC36A1	0
chr12-1328345	rs79543065	chr12_1263034_1290012:+	circERC1-1	ERC1	hsa-miR-29b-3p	ENSG00000123643	SLC36A1	0
chr12-1328345	rs79543065	chr12_1263034_1290012:+	circERC1-1	ERC1	hsa-miR-29c-3p	ENSG00000123643	SLC36A1	0
chr12-1411392	rs80018118	chr12_1263034_1290012:+	circERC1-1	ERC1	hsa-miR-29a-3p	ENSG00000123643	SLC36A1	0
chr12-1411392	rs80018118	chr12_1263034_1290012:+	circERC1-1	ERC1	hsa-miR-29b-3p	ENSG00000123643	SLC36A1	0
chr12-1411392	rs80018118	chr12_1263034_1290012:+	circERC1-1	ERC1	hsa-miR-29c-3p	ENSG00000123643	SLC36A1	0
chr12-1420263	rs117601704	chr12_1263034_1290012:+	circERC1-1	ERC1	hsa-miR-29a-3p	ENSG00000123643	SLC36A1	0
chr12-1420263	rs117601704	chr12_1263034_1290012:+	circERC1-1	ERC1	hsa-miR-29b-3p	ENSG00000123643	SLC36A1	0
chr12-1420263	rs117601704	chr12_1263034_1290012:+	circERC1-1	ERC1	hsa-miR-29c-3p	ENSG00000123643	SLC36A1	0
chr12-1328345	rs79543065	chr12_1263034_1290012:+	circERC1-1	ERC1	hsa-miR-29a-3p	ENSG00000124459	ZNF45	0
chr12-1328345	rs79543065	chr12_1263034_1290012:+	circERC1-1	ERC1	hsa-miR-29b-3p	ENSG00000124459	ZNF45	0
chr12-1328345	rs79543065	chr12_1263034_1290012:+	circERC1-1	ERC1	hsa-miR-29c-3p	ENSG00000124459	ZNF45	0
chr12-1411392	rs80018118	chr12_1263034_1290012:+	circERC1-1	ERC1	hsa-miR-29a-3p	ENSG00000124459	ZNF45	0
chr12-1411392	rs80018118	chr12_1263034_1290012:+	circERC1-1	ERC1	hsa-miR-29b-3p	ENSG00000124459	ZNF45	0
chr12-1411392	rs80018118	chr12_1263034_1290012:+	circERC1-1	ERC1	hsa-miR-29c-3p	ENSG00000124459	ZNF45	0
chr12-1420263	rs117601704	chr12_1263034_1290012:+	circERC1-1	ERC1	hsa-miR-29a-3p	ENSG00000124459	ZNF45	0
chr12-1420263	rs117601704	chr12_1263034_1290012:+	circERC1-1	ERC1	hsa-miR-29b-3p	ENSG00000124459	ZNF45	0
chr12-1420263	rs117601704	chr12_1263034_1290012:+	circERC1-1	ERC1	hsa-miR-29c-3p	ENSG00000124459	ZNF45	0
chr12-1328345	rs79543065	chr12_1263034_1290012:+	circERC1-1	ERC1	hsa-miR-133a-3p	ENSG00000124795	DEK	0
chr12-1328345	rs79543065	chr12_1263034_1290012:+	circERC1-1	ERC1	hsa-miR-133b	ENSG00000124795	DEK	0
chr12-1411392	rs80018118	chr12_1263034_1290012:+	circERC1-1	ERC1	hsa-miR-133a-3p	ENSG00000124795	DEK	0
chr12-1411392	rs80018118	chr12_1263034_1290012:+	circERC1-1	ERC1	hsa-miR-133b	ENSG00000124795	DEK	0
chr12-1420263	rs117601704	chr12_1263034_1290012:+	circERC1-1	ERC1	hsa-miR-133a-3p	ENSG00000124795	DEK	0
chr12-1420263	rs117601704	chr12_1263034_1290012:+	circERC1-1	ERC1	hsa-miR-133b	ENSG00000124795	DEK	0
chr12-1328345	rs79543065	chr12_1263034_1290012:+	circERC1-1	ERC1	hsa-miR-133a-3p	ENSG00000127914	AKAP9	0
chr12-1328345	rs79543065	chr12_1263034_1290012:+	circERC1-1	ERC1	hsa-miR-133b	ENSG00000127914	AKAP9	0
chr12-1411392	rs80018118	chr12_1263034_1290012:+	circERC1-1	ERC1	hsa-miR-133a-3p	ENSG00000127914	AKAP9	0
chr12-1411392	rs80018118	chr12_1263034_1290012:+	circERC1-1	ERC1	hsa-miR-133b	ENSG00000127914	AKAP9	0
chr12-1420263	rs117601704	chr12_1263034_1290012:+	circERC1-1	ERC1	hsa-miR-133a-3p	ENSG00000127914	AKAP9	0
chr12-1420263	rs117601704	chr12_1263034_1290012:+	circERC1-1	ERC1	hsa-miR-133b	ENSG00000127914	AKAP9	0
chr12-1328345	rs79543065	chr12_1263034_1290012:+	circERC1-1	ERC1	hsa-miR-29a-3p	ENSG00000130584	ZBTB46	0
chr12-1328345	rs79543065	chr12_1263034_1290012:+	circERC1-1	ERC1	hsa-miR-29b-3p	ENSG00000130584	ZBTB46	0
chr12-1328345	rs79543065	chr12_1263034_1290012:+	circERC1-1	ERC1	hsa-miR-29c-3p	ENSG00000130584	ZBTB46	0
chr12-1411392	rs80018118	chr12_1263034_1290012:+	circERC1-1	ERC1	hsa-miR-29a-3p	ENSG00000130584	ZBTB46	0
chr12-1411392	rs80018118	chr12_1263034_1290012:+	circERC1-1	ERC1	hsa-miR-29b-3p	ENSG00000130584	ZBTB46	0
chr12-1411392	rs80018118	chr12_1263034_1290012:+	circERC1-1	ERC1	hsa-miR-29c-3p	ENSG00000130584	ZBTB46	0
chr12-1420263	rs117601704	chr12_1263034_1290012:+	circERC1-1	ERC1	hsa-miR-29a-3p	ENSG00000130584	ZBTB46	0
chr12-1420263	rs117601704	chr12_1263034_1290012:+	circERC1-1	ERC1	hsa-miR-29b-3p	ENSG00000130584	ZBTB46	0
chr12-1420263	rs117601704	chr12_1263034_1290012:+	circERC1-1	ERC1	hsa-miR-29c-3p	ENSG00000130584	ZBTB46	0
chr12-1328345	rs79543065	chr12_1263034_1290012:+	circERC1-1	ERC1	hsa-miR-133a-3p	ENSG00000130779	CLIP1	0
chr12-1328345	rs79543065	chr12_1263034_1290012:+	circERC1-1	ERC1	hsa-miR-133b	ENSG00000130779	CLIP1	0
chr12-1411392	rs80018118	chr12_1263034_1290012:+	circERC1-1	ERC1	hsa-miR-133a-3p	ENSG00000130779	CLIP1	0
chr12-1411392	rs80018118	chr12_1263034_1290012:+	circERC1-1	ERC1	hsa-miR-133b	ENSG00000130779	CLIP1	0
chr12-1420263	rs117601704	chr12_1263034_1290012:+	circERC1-1	ERC1	hsa-miR-133a-3p	ENSG00000130779	CLIP1	0
chr12-1420263	rs117601704	chr12_1263034_1290012:+	circERC1-1	ERC1	hsa-miR-133b	ENSG00000130779	CLIP1	0
chr12-1328345	rs79543065	chr12_1263034_1290012:+	circERC1-1	ERC1	hsa-miR-133a-3p	ENSG00000131016	AKAP12	0
chr12-1328345	rs79543065	chr12_1263034_1290012:+	circERC1-1	ERC1	hsa-miR-133b	ENSG00000131016	AKAP12	0
chr12-1411392	rs80018118	chr12_1263034_1290012:+	circERC1-1	ERC1	hsa-miR-133a-3p	ENSG00000131016	AKAP12	0
chr12-1411392	rs80018118	chr12_1263034_1290012:+	circERC1-1	ERC1	hsa-miR-133b	ENSG00000131016	AKAP12	0
chr12-1420263	rs117601704	chr12_1263034_1290012:+	circERC1-1	ERC1	hsa-miR-133a-3p	ENSG00000131016	AKAP12	0
chr12-1420263	rs117601704	chr12_1263034_1290012:+	circERC1-1	ERC1	hsa-miR-133b	ENSG00000131016	AKAP12	0
chr12-1328345	rs79543065	chr12_1263034_1290012:+	circERC1-1	ERC1	hsa-miR-133a-3p	ENSG00000132640	BTBD3	1
chr12-1328345	rs79543065	chr12_1263034_1290012:+	circERC1-1	ERC1	hsa-miR-133b	ENSG00000132640	BTBD3	1
chr12-1411392	rs80018118	chr12_1263034_1290012:+	circERC1-1	ERC1	hsa-miR-133a-3p	ENSG00000132640	BTBD3	1
chr12-1411392	rs80018118	chr12_1263034_1290012:+	circERC1-1	ERC1	hsa-miR-133b	ENSG00000132640	BTBD3	1
chr12-1420263	rs117601704	chr12_1263034_1290012:+	circERC1-1	ERC1	hsa-miR-133a-3p	ENSG00000132640	BTBD3	1
chr12-1420263	rs117601704	chr12_1263034_1290012:+	circERC1-1	ERC1	hsa-miR-133b	ENSG00000132640	BTBD3	1
chr12-1328345	rs79543065	chr12_1263034_1290012:+	circERC1-1	ERC1	hsa-miR-133a-3p	ENSG00000133119	RFC3	0
chr12-1328345	rs79543065	chr12_1263034_1290012:+	circERC1-1	ERC1	hsa-miR-133b	ENSG00000133119	RFC3	0
chr12-1411392	rs80018118	chr12_1263034_1290012:+	circERC1-1	ERC1	hsa-miR-133a-3p	ENSG00000133119	RFC3	0
chr12-1411392	rs80018118	chr12_1263034_1290012:+	circERC1-1	ERC1	hsa-miR-133b	ENSG00000133119	RFC3	0
chr12-1420263	rs117601704	chr12_1263034_1290012:+	circERC1-1	ERC1	hsa-miR-133a-3p	ENSG00000133119	RFC3	0
chr12-1420263	rs117601704	chr12_1263034_1290012:+	circERC1-1	ERC1	hsa-miR-133b	ENSG00000133119	RFC3	0
chr12-1328345	rs79543065	chr12_1263034_1290012:+	circERC1-1	ERC1	hsa-miR-29a-3p	ENSG00000134909	ARHGAP32	0
chr12-1328345	rs79543065	chr12_1263034_1290012:+	circERC1-1	ERC1	hsa-miR-29b-3p	ENSG00000134909	ARHGAP32	0
chr12-1328345	rs79543065	chr12_1263034_1290012:+	circERC1-1	ERC1	hsa-miR-29c-3p	ENSG00000134909	ARHGAP32	0
chr12-1411392	rs80018118	chr12_1263034_1290012:+	circERC1-1	ERC1	hsa-miR-29a-3p	ENSG00000134909	ARHGAP32	0
chr12-1411392	rs80018118	chr12_1263034_1290012:+	circERC1-1	ERC1	hsa-miR-29b-3p	ENSG00000134909	ARHGAP32	0
chr12-1411392	rs80018118	chr12_1263034_1290012:+	circERC1-1	ERC1	hsa-miR-29c-3p	ENSG00000134909	ARHGAP32	0
chr12-1420263	rs117601704	chr12_1263034_1290012:+	circERC1-1	ERC1	hsa-miR-29a-3p	ENSG00000134909	ARHGAP32	0
chr12-1420263	rs117601704	chr12_1263034_1290012:+	circERC1-1	ERC1	hsa-miR-29b-3p	ENSG00000134909	ARHGAP32	0
chr12-1420263	rs117601704	chr12_1263034_1290012:+	circERC1-1	ERC1	hsa-miR-29c-3p	ENSG00000134909	ARHGAP32	0
chr12-1328345	rs79543065	chr12_1263034_1290012:+	circERC1-1	ERC1	hsa-miR-29a-3p	ENSG00000134986	NREP	0
chr12-1328345	rs79543065	chr12_1263034_1290012:+	circERC1-1	ERC1	hsa-miR-29b-3p	ENSG00000134986	NREP	0
chr12-1328345	rs79543065	chr12_1263034_1290012:+	circERC1-1	ERC1	hsa-miR-29c-3p	ENSG00000134986	NREP	0
chr12-1411392	rs80018118	chr12_1263034_1290012:+	circERC1-1	ERC1	hsa-miR-29a-3p	ENSG00000134986	NREP	0
chr12-1411392	rs80018118	chr12_1263034_1290012:+	circERC1-1	ERC1	hsa-miR-29b-3p	ENSG00000134986	NREP	0
chr12-1411392	rs80018118	chr12_1263034_1290012:+	circERC1-1	ERC1	hsa-miR-29c-3p	ENSG00000134986	NREP	0
chr12-1420263	rs117601704	chr12_1263034_1290012:+	circERC1-1	ERC1	hsa-miR-29a-3p	ENSG00000134986	NREP	0
chr12-1420263	rs117601704	chr12_1263034_1290012:+	circERC1-1	ERC1	hsa-miR-29b-3p	ENSG00000134986	NREP	0
chr12-1420263	rs117601704	chr12_1263034_1290012:+	circERC1-1	ERC1	hsa-miR-29c-3p	ENSG00000134986	NREP	0
chr12-1328345	rs79543065	chr12_1263034_1290012:+	circERC1-1	ERC1	hsa-miR-29a-3p	ENSG00000135083	CCNJL	0
chr12-1328345	rs79543065	chr12_1263034_1290012:+	circERC1-1	ERC1	hsa-miR-29b-3p	ENSG00000135083	CCNJL	0
chr12-1328345	rs79543065	chr12_1263034_1290012:+	circERC1-1	ERC1	hsa-miR-29c-3p	ENSG00000135083	CCNJL	0
chr12-1411392	rs80018118	chr12_1263034_1290012:+	circERC1-1	ERC1	hsa-miR-29a-3p	ENSG00000135083	CCNJL	0
chr12-1411392	rs80018118	chr12_1263034_1290012:+	circERC1-1	ERC1	hsa-miR-29b-3p	ENSG00000135083	CCNJL	0
chr12-1411392	rs80018118	chr12_1263034_1290012:+	circERC1-1	ERC1	hsa-miR-29c-3p	ENSG00000135083	CCNJL	0
chr12-1420263	rs117601704	chr12_1263034_1290012:+	circERC1-1	ERC1	hsa-miR-29a-3p	ENSG00000135083	CCNJL	0
chr12-1420263	rs117601704	chr12_1263034_1290012:+	circERC1-1	ERC1	hsa-miR-29b-3p	ENSG00000135083	CCNJL	0
chr12-1420263	rs117601704	chr12_1263034_1290012:+	circERC1-1	ERC1	hsa-miR-29c-3p	ENSG00000135083	CCNJL	0
chr12-1328345	rs79543065	chr12_1263034_1290012:+	circERC1-1	ERC1	hsa-miR-29b-3p	ENSG00000135945	REV1	0
chr12-1411392	rs80018118	chr12_1263034_1290012:+	circERC1-1	ERC1	hsa-miR-29b-3p	ENSG00000135945	REV1	0
chr12-1420263	rs117601704	chr12_1263034_1290012:+	circERC1-1	ERC1	hsa-miR-29b-3p	ENSG00000135945	REV1	0
chr12-1328345	rs79543065	chr12_1263034_1290012:+	circERC1-1	ERC1	hsa-miR-133a-3p	ENSG00000136141	LRCH1	0
chr12-1328345	rs79543065	chr12_1263034_1290012:+	circERC1-1	ERC1	hsa-miR-133b	ENSG00000136141	LRCH1	0
chr12-1411392	rs80018118	chr12_1263034_1290012:+	circERC1-1	ERC1	hsa-miR-133a-3p	ENSG00000136141	LRCH1	0
chr12-1411392	rs80018118	chr12_1263034_1290012:+	circERC1-1	ERC1	hsa-miR-133b	ENSG00000136141	LRCH1	0
chr12-1420263	rs117601704	chr12_1263034_1290012:+	circERC1-1	ERC1	hsa-miR-133a-3p	ENSG00000136141	LRCH1	0
chr12-1420263	rs117601704	chr12_1263034_1290012:+	circERC1-1	ERC1	hsa-miR-133b	ENSG00000136141	LRCH1	0
chr12-1328345	rs79543065	chr12_1263034_1290012:+	circERC1-1	ERC1	hsa-miR-29a-3p	ENSG00000136457	CHAD	0
chr12-1328345	rs79543065	chr12_1263034_1290012:+	circERC1-1	ERC1	hsa-miR-29b-3p	ENSG00000136457	CHAD	0
chr12-1328345	rs79543065	chr12_1263034_1290012:+	circERC1-1	ERC1	hsa-miR-29c-3p	ENSG00000136457	CHAD	0
chr12-1411392	rs80018118	chr12_1263034_1290012:+	circERC1-1	ERC1	hsa-miR-29a-3p	ENSG00000136457	CHAD	0
chr12-1411392	rs80018118	chr12_1263034_1290012:+	circERC1-1	ERC1	hsa-miR-29b-3p	ENSG00000136457	CHAD	0
chr12-1411392	rs80018118	chr12_1263034_1290012:+	circERC1-1	ERC1	hsa-miR-29c-3p	ENSG00000136457	CHAD	0
chr12-1420263	rs117601704	chr12_1263034_1290012:+	circERC1-1	ERC1	hsa-miR-29a-3p	ENSG00000136457	CHAD	0
chr12-1420263	rs117601704	chr12_1263034_1290012:+	circERC1-1	ERC1	hsa-miR-29b-3p	ENSG00000136457	CHAD	0
chr12-1420263	rs117601704	chr12_1263034_1290012:+	circERC1-1	ERC1	hsa-miR-29c-3p	ENSG00000136457	CHAD	0
chr12-1328345	rs79543065	chr12_1263034_1290012:+	circERC1-1	ERC1	hsa-miR-29a-3p	ENSG00000136709	WDR33	0
chr12-1328345	rs79543065	chr12_1263034_1290012:+	circERC1-1	ERC1	hsa-miR-29b-3p	ENSG00000136709	WDR33	0
chr12-1328345	rs79543065	chr12_1263034_1290012:+	circERC1-1	ERC1	hsa-miR-29c-3p	ENSG00000136709	WDR33	0
chr12-1411392	rs80018118	chr12_1263034_1290012:+	circERC1-1	ERC1	hsa-miR-29a-3p	ENSG00000136709	WDR33	0
chr12-1411392	rs80018118	chr12_1263034_1290012:+	circERC1-1	ERC1	hsa-miR-29b-3p	ENSG00000136709	WDR33	0
chr12-1411392	rs80018118	chr12_1263034_1290012:+	circERC1-1	ERC1	hsa-miR-29c-3p	ENSG00000136709	WDR33	0
chr12-1420263	rs117601704	chr12_1263034_1290012:+	circERC1-1	ERC1	hsa-miR-29a-3p	ENSG00000136709	WDR33	0
chr12-1420263	rs117601704	chr12_1263034_1290012:+	circERC1-1	ERC1	hsa-miR-29b-3p	ENSG00000136709	WDR33	0
chr12-1420263	rs117601704	chr12_1263034_1290012:+	circERC1-1	ERC1	hsa-miR-29c-3p	ENSG00000136709	WDR33	0
chr12-1328345	rs79543065	chr12_1263034_1290012:+	circERC1-1	ERC1	hsa-miR-29a-3p	ENSG00000136848	DAB2IP	0
chr12-1328345	rs79543065	chr12_1263034_1290012:+	circERC1-1	ERC1	hsa-miR-29b-3p	ENSG00000136848	DAB2IP	0
chr12-1328345	rs79543065	chr12_1263034_1290012:+	circERC1-1	ERC1	hsa-miR-29c-3p	ENSG00000136848	DAB2IP	0
chr12-1411392	rs80018118	chr12_1263034_1290012:+	circERC1-1	ERC1	hsa-miR-29a-3p	ENSG00000136848	DAB2IP	0
chr12-1411392	rs80018118	chr12_1263034_1290012:+	circERC1-1	ERC1	hsa-miR-29b-3p	ENSG00000136848	DAB2IP	0
chr12-1411392	rs80018118	chr12_1263034_1290012:+	circERC1-1	ERC1	hsa-miR-29c-3p	ENSG00000136848	DAB2IP	0
chr12-1420263	rs117601704	chr12_1263034_1290012:+	circERC1-1	ERC1	hsa-miR-29a-3p	ENSG00000136848	DAB2IP	0
chr12-1420263	rs117601704	chr12_1263034_1290012:+	circERC1-1	ERC1	hsa-miR-29b-3p	ENSG00000136848	DAB2IP	0
chr12-1420263	rs117601704	chr12_1263034_1290012:+	circERC1-1	ERC1	hsa-miR-29c-3p	ENSG00000136848	DAB2IP	0
chr12-1328345	rs79543065	chr12_1263034_1290012:+	circERC1-1	ERC1	hsa-miR-133a-3p	ENSG00000137203	TFAP2A	0
chr12-1328345	rs79543065	chr12_1263034_1290012:+	circERC1-1	ERC1	hsa-miR-133b	ENSG00000137203	TFAP2A	0
chr12-1411392	rs80018118	chr12_1263034_1290012:+	circERC1-1	ERC1	hsa-miR-133a-3p	ENSG00000137203	TFAP2A	0
chr12-1411392	rs80018118	chr12_1263034_1290012:+	circERC1-1	ERC1	hsa-miR-133b	ENSG00000137203	TFAP2A	0
chr12-1420263	rs117601704	chr12_1263034_1290012:+	circERC1-1	ERC1	hsa-miR-133a-3p	ENSG00000137203	TFAP2A	0
chr12-1420263	rs117601704	chr12_1263034_1290012:+	circERC1-1	ERC1	hsa-miR-133b	ENSG00000137203	TFAP2A	0
chr12-1328345	rs79543065	chr12_1263034_1290012:+	circERC1-1	ERC1	hsa-miR-29a-3p	ENSG00000137802	MAPKBP1	0
chr12-1328345	rs79543065	chr12_1263034_1290012:+	circERC1-1	ERC1	hsa-miR-29b-3p	ENSG00000137802	MAPKBP1	0
chr12-1328345	rs79543065	chr12_1263034_1290012:+	circERC1-1	ERC1	hsa-miR-29c-3p	ENSG00000137802	MAPKBP1	0
chr12-1411392	rs80018118	chr12_1263034_1290012:+	circERC1-1	ERC1	hsa-miR-29a-3p	ENSG00000137802	MAPKBP1	0
chr12-1411392	rs80018118	chr12_1263034_1290012:+	circERC1-1	ERC1	hsa-miR-29b-3p	ENSG00000137802	MAPKBP1	0
chr12-1411392	rs80018118	chr12_1263034_1290012:+	circERC1-1	ERC1	hsa-miR-29c-3p	ENSG00000137802	MAPKBP1	0
chr12-1420263	rs117601704	chr12_1263034_1290012:+	circERC1-1	ERC1	hsa-miR-29a-3p	ENSG00000137802	MAPKBP1	0
chr12-1420263	rs117601704	chr12_1263034_1290012:+	circERC1-1	ERC1	hsa-miR-29b-3p	ENSG00000137802	MAPKBP1	0
chr12-1420263	rs117601704	chr12_1263034_1290012:+	circERC1-1	ERC1	hsa-miR-29c-3p	ENSG00000137802	MAPKBP1	0
chr12-1328345	rs79543065	chr12_1263034_1290012:+	circERC1-1	ERC1	hsa-miR-29a-3p	ENSG00000137962	ARHGAP29	0
chr12-1328345	rs79543065	chr12_1263034_1290012:+	circERC1-1	ERC1	hsa-miR-29b-3p	ENSG00000137962	ARHGAP29	0
chr12-1328345	rs79543065	chr12_1263034_1290012:+	circERC1-1	ERC1	hsa-miR-29c-3p	ENSG00000137962	ARHGAP29	0
chr12-1411392	rs80018118	chr12_1263034_1290012:+	circERC1-1	ERC1	hsa-miR-29a-3p	ENSG00000137962	ARHGAP29	0
chr12-1411392	rs80018118	chr12_1263034_1290012:+	circERC1-1	ERC1	hsa-miR-29b-3p	ENSG00000137962	ARHGAP29	0
chr12-1411392	rs80018118	chr12_1263034_1290012:+	circERC1-1	ERC1	hsa-miR-29c-3p	ENSG00000137962	ARHGAP29	0
chr12-1420263	rs117601704	chr12_1263034_1290012:+	circERC1-1	ERC1	hsa-miR-29a-3p	ENSG00000137962	ARHGAP29	0
chr12-1420263	rs117601704	chr12_1263034_1290012:+	circERC1-1	ERC1	hsa-miR-29b-3p	ENSG00000137962	ARHGAP29	0
chr12-1420263	rs117601704	chr12_1263034_1290012:+	circERC1-1	ERC1	hsa-miR-29c-3p	ENSG00000137962	ARHGAP29	0
chr12-1328345	rs79543065	chr12_1263034_1290012:+	circERC1-1	ERC1	hsa-miR-29a-3p	ENSG00000138336	TET1	0
chr12-1328345	rs79543065	chr12_1263034_1290012:+	circERC1-1	ERC1	hsa-miR-29b-3p	ENSG00000138336	TET1	0
chr12-1328345	rs79543065	chr12_1263034_1290012:+	circERC1-1	ERC1	hsa-miR-29c-3p	ENSG00000138336	TET1	0
chr12-1411392	rs80018118	chr12_1263034_1290012:+	circERC1-1	ERC1	hsa-miR-29a-3p	ENSG00000138336	TET1	0
chr12-1411392	rs80018118	chr12_1263034_1290012:+	circERC1-1	ERC1	hsa-miR-29b-3p	ENSG00000138336	TET1	0
chr12-1411392	rs80018118	chr12_1263034_1290012:+	circERC1-1	ERC1	hsa-miR-29c-3p	ENSG00000138336	TET1	0
chr12-1420263	rs117601704	chr12_1263034_1290012:+	circERC1-1	ERC1	hsa-miR-29a-3p	ENSG00000138336	TET1	0
chr12-1420263	rs117601704	chr12_1263034_1290012:+	circERC1-1	ERC1	hsa-miR-29b-3p	ENSG00000138336	TET1	0
chr12-1420263	rs117601704	chr12_1263034_1290012:+	circERC1-1	ERC1	hsa-miR-29c-3p	ENSG00000138336	TET1	0
chr12-1328345	rs79543065	chr12_1263034_1290012:+	circERC1-1	ERC1	hsa-miR-29a-3p	ENSG00000138764	CCNG2	0
chr12-1328345	rs79543065	chr12_1263034_1290012:+	circERC1-1	ERC1	hsa-miR-29b-3p	ENSG00000138764	CCNG2	0
chr12-1328345	rs79543065	chr12_1263034_1290012:+	circERC1-1	ERC1	hsa-miR-29c-3p	ENSG00000138764	CCNG2	0
chr12-1411392	rs80018118	chr12_1263034_1290012:+	circERC1-1	ERC1	hsa-miR-29a-3p	ENSG00000138764	CCNG2	0
chr12-1411392	rs80018118	chr12_1263034_1290012:+	circERC1-1	ERC1	hsa-miR-29b-3p	ENSG00000138764	CCNG2	0
chr12-1411392	rs80018118	chr12_1263034_1290012:+	circERC1-1	ERC1	hsa-miR-29c-3p	ENSG00000138764	CCNG2	0
chr12-1420263	rs117601704	chr12_1263034_1290012:+	circERC1-1	ERC1	hsa-miR-29a-3p	ENSG00000138764	CCNG2	0
chr12-1420263	rs117601704	chr12_1263034_1290012:+	circERC1-1	ERC1	hsa-miR-29b-3p	ENSG00000138764	CCNG2	0
chr12-1420263	rs117601704	chr12_1263034_1290012:+	circERC1-1	ERC1	hsa-miR-29c-3p	ENSG00000138764	CCNG2	0
chr12-1328345	rs79543065	chr12_1263034_1290012:+	circERC1-1	ERC1	hsa-miR-29a-3p	ENSG00000139546	TARBP2	0
chr12-1328345	rs79543065	chr12_1263034_1290012:+	circERC1-1	ERC1	hsa-miR-29b-3p	ENSG00000139546	TARBP2	0
chr12-1328345	rs79543065	chr12_1263034_1290012:+	circERC1-1	ERC1	hsa-miR-29c-3p	ENSG00000139546	TARBP2	0
chr12-1411392	rs80018118	chr12_1263034_1290012:+	circERC1-1	ERC1	hsa-miR-29a-3p	ENSG00000139546	TARBP2	0
chr12-1411392	rs80018118	chr12_1263034_1290012:+	circERC1-1	ERC1	hsa-miR-29b-3p	ENSG00000139546	TARBP2	0
chr12-1411392	rs80018118	chr12_1263034_1290012:+	circERC1-1	ERC1	hsa-miR-29c-3p	ENSG00000139546	TARBP2	0
chr12-1420263	rs117601704	chr12_1263034_1290012:+	circERC1-1	ERC1	hsa-miR-29a-3p	ENSG00000139546	TARBP2	0
chr12-1420263	rs117601704	chr12_1263034_1290012:+	circERC1-1	ERC1	hsa-miR-29b-3p	ENSG00000139546	TARBP2	0
chr12-1420263	rs117601704	chr12_1263034_1290012:+	circERC1-1	ERC1	hsa-miR-29c-3p	ENSG00000139546	TARBP2	0
chr12-1328345	rs79543065	chr12_1263034_1290012:+	circERC1-1	ERC1	hsa-miR-133a-3p	ENSG00000139651	ZNF740	0
chr12-1328345	rs79543065	chr12_1263034_1290012:+	circERC1-1	ERC1	hsa-miR-133b	ENSG00000139651	ZNF740	0
chr12-1328345	rs79543065	chr12_1263034_1290012:+	circERC1-1	ERC1	hsa-miR-29a-3p	ENSG00000139651	ZNF740	0
chr12-1328345	rs79543065	chr12_1263034_1290012:+	circERC1-1	ERC1	hsa-miR-29b-3p	ENSG00000139651	ZNF740	0
chr12-1328345	rs79543065	chr12_1263034_1290012:+	circERC1-1	ERC1	hsa-miR-29c-3p	ENSG00000139651	ZNF740	0
chr12-1411392	rs80018118	chr12_1263034_1290012:+	circERC1-1	ERC1	hsa-miR-133a-3p	ENSG00000139651	ZNF740	0
chr12-1411392	rs80018118	chr12_1263034_1290012:+	circERC1-1	ERC1	hsa-miR-133b	ENSG00000139651	ZNF740	0
chr12-1411392	rs80018118	chr12_1263034_1290012:+	circERC1-1	ERC1	hsa-miR-29a-3p	ENSG00000139651	ZNF740	0
chr12-1411392	rs80018118	chr12_1263034_1290012:+	circERC1-1	ERC1	hsa-miR-29b-3p	ENSG00000139651	ZNF740	0
chr12-1411392	rs80018118	chr12_1263034_1290012:+	circERC1-1	ERC1	hsa-miR-29c-3p	ENSG00000139651	ZNF740	0
chr12-1420263	rs117601704	chr12_1263034_1290012:+	circERC1-1	ERC1	hsa-miR-133a-3p	ENSG00000139651	ZNF740	0
chr12-1420263	rs117601704	chr12_1263034_1290012:+	circERC1-1	ERC1	hsa-miR-133b	ENSG00000139651	ZNF740	0
chr12-1420263	rs117601704	chr12_1263034_1290012:+	circERC1-1	ERC1	hsa-miR-29a-3p	ENSG00000139651	ZNF740	0
chr12-1420263	rs117601704	chr12_1263034_1290012:+	circERC1-1	ERC1	hsa-miR-29b-3p	ENSG00000139651	ZNF740	0
chr12-1420263	rs117601704	chr12_1263034_1290012:+	circERC1-1	ERC1	hsa-miR-29c-3p	ENSG00000139651	ZNF740	0
chr12-1328345	rs79543065	chr12_1263034_1290012:+	circERC1-1	ERC1	hsa-miR-29a-3p	ENSG00000139800	ZIC5	0
chr12-1328345	rs79543065	chr12_1263034_1290012:+	circERC1-1	ERC1	hsa-miR-29b-3p	ENSG00000139800	ZIC5	0
chr12-1328345	rs79543065	chr12_1263034_1290012:+	circERC1-1	ERC1	hsa-miR-29c-3p	ENSG00000139800	ZIC5	0
chr12-1411392	rs80018118	chr12_1263034_1290012:+	circERC1-1	ERC1	hsa-miR-29a-3p	ENSG00000139800	ZIC5	0
chr12-1411392	rs80018118	chr12_1263034_1290012:+	circERC1-1	ERC1	hsa-miR-29b-3p	ENSG00000139800	ZIC5	0
chr12-1411392	rs80018118	chr12_1263034_1290012:+	circERC1-1	ERC1	hsa-miR-29c-3p	ENSG00000139800	ZIC5	0
chr12-1420263	rs117601704	chr12_1263034_1290012:+	circERC1-1	ERC1	hsa-miR-29a-3p	ENSG00000139800	ZIC5	0
chr12-1420263	rs117601704	chr12_1263034_1290012:+	circERC1-1	ERC1	hsa-miR-29b-3p	ENSG00000139800	ZIC5	0
chr12-1420263	rs117601704	chr12_1263034_1290012:+	circERC1-1	ERC1	hsa-miR-29c-3p	ENSG00000139800	ZIC5	0
chr12-1411392	rs80018118	chr12_1263034_1290012:+	circERC1-1	ERC1	hsa-miR-29a-3p	ENSG00000139926	FRMD6	0
chr12-1411392	rs80018118	chr12_1263034_1290012:+	circERC1-1	ERC1	hsa-miR-29b-3p	ENSG00000139926	FRMD6	0
chr12-1411392	rs80018118	chr12_1263034_1290012:+	circERC1-1	ERC1	hsa-miR-29c-3p	ENSG00000139926	FRMD6	0
chr12-1420263	rs117601704	chr12_1263034_1290012:+	circERC1-1	ERC1	hsa-miR-29a-3p	ENSG00000139926	FRMD6	0
chr12-1420263	rs117601704	chr12_1263034_1290012:+	circERC1-1	ERC1	hsa-miR-29b-3p	ENSG00000139926	FRMD6	0
chr12-1420263	rs117601704	chr12_1263034_1290012:+	circERC1-1	ERC1	hsa-miR-29c-3p	ENSG00000139926	FRMD6	0
chr12-1328345	rs79543065	chr12_1263034_1290012:+	circERC1-1	ERC1	hsa-miR-29a-3p	ENSG00000139946	PELI2	0
chr12-1328345	rs79543065	chr12_1263034_1290012:+	circERC1-1	ERC1	hsa-miR-29b-3p	ENSG00000139946	PELI2	0
chr12-1328345	rs79543065	chr12_1263034_1290012:+	circERC1-1	ERC1	hsa-miR-29c-3p	ENSG00000139946	PELI2	0
chr12-1411392	rs80018118	chr12_1263034_1290012:+	circERC1-1	ERC1	hsa-miR-29a-3p	ENSG00000139946	PELI2	0
chr12-1411392	rs80018118	chr12_1263034_1290012:+	circERC1-1	ERC1	hsa-miR-29b-3p	ENSG00000139946	PELI2	0
chr12-1411392	rs80018118	chr12_1263034_1290012:+	circERC1-1	ERC1	hsa-miR-29c-3p	ENSG00000139946	PELI2	0
chr12-1420263	rs117601704	chr12_1263034_1290012:+	circERC1-1	ERC1	hsa-miR-29a-3p	ENSG00000139946	PELI2	0
chr12-1420263	rs117601704	chr12_1263034_1290012:+	circERC1-1	ERC1	hsa-miR-29b-3p	ENSG00000139946	PELI2	0
chr12-1420263	rs117601704	chr12_1263034_1290012:+	circERC1-1	ERC1	hsa-miR-29c-3p	ENSG00000139946	PELI2	0
chr12-1328345	rs79543065	chr12_1263034_1290012:+	circERC1-1	ERC1	hsa-miR-29a-3p	ENSG00000141738	GRB7	0
chr12-1328345	rs79543065	chr12_1263034_1290012:+	circERC1-1	ERC1	hsa-miR-29b-3p	ENSG00000141738	GRB7	0
chr12-1328345	rs79543065	chr12_1263034_1290012:+	circERC1-1	ERC1	hsa-miR-29c-3p	ENSG00000141738	GRB7	0
chr12-1411392	rs80018118	chr12_1263034_1290012:+	circERC1-1	ERC1	hsa-miR-29a-3p	ENSG00000141738	GRB7	0
chr12-1411392	rs80018118	chr12_1263034_1290012:+	circERC1-1	ERC1	hsa-miR-29b-3p	ENSG00000141738	GRB7	0
chr12-1411392	rs80018118	chr12_1263034_1290012:+	circERC1-1	ERC1	hsa-miR-29c-3p	ENSG00000141738	GRB7	0
chr12-1420263	rs117601704	chr12_1263034_1290012:+	circERC1-1	ERC1	hsa-miR-29a-3p	ENSG00000141738	GRB7	0
chr12-1420263	rs117601704	chr12_1263034_1290012:+	circERC1-1	ERC1	hsa-miR-29b-3p	ENSG00000141738	GRB7	0
chr12-1420263	rs117601704	chr12_1263034_1290012:+	circERC1-1	ERC1	hsa-miR-29c-3p	ENSG00000141738	GRB7	0
chr12-1328345	rs79543065	chr12_1263034_1290012:+	circERC1-1	ERC1	hsa-miR-29a-3p	ENSG00000143401	ANP32E	0
chr12-1328345	rs79543065	chr12_1263034_1290012:+	circERC1-1	ERC1	hsa-miR-29b-3p	ENSG00000143401	ANP32E	0
chr12-1328345	rs79543065	chr12_1263034_1290012:+	circERC1-1	ERC1	hsa-miR-29c-3p	ENSG00000143401	ANP32E	0
chr12-1411392	rs80018118	chr12_1263034_1290012:+	circERC1-1	ERC1	hsa-miR-29a-3p	ENSG00000143401	ANP32E	0
chr12-1411392	rs80018118	chr12_1263034_1290012:+	circERC1-1	ERC1	hsa-miR-29b-3p	ENSG00000143401	ANP32E	0
chr12-1411392	rs80018118	chr12_1263034_1290012:+	circERC1-1	ERC1	hsa-miR-29c-3p	ENSG00000143401	ANP32E	0
chr12-1420263	rs117601704	chr12_1263034_1290012:+	circERC1-1	ERC1	hsa-miR-29a-3p	ENSG00000143401	ANP32E	0
chr12-1420263	rs117601704	chr12_1263034_1290012:+	circERC1-1	ERC1	hsa-miR-29b-3p	ENSG00000143401	ANP32E	0
chr12-1420263	rs117601704	chr12_1263034_1290012:+	circERC1-1	ERC1	hsa-miR-29c-3p	ENSG00000143401	ANP32E	0
chr12-1328345	rs79543065	chr12_1263034_1290012:+	circERC1-1	ERC1	hsa-miR-133a-3p	ENSG00000143952	VPS54	0
chr12-1328345	rs79543065	chr12_1263034_1290012:+	circERC1-1	ERC1	hsa-miR-133b	ENSG00000143952	VPS54	0
chr12-1411392	rs80018118	chr12_1263034_1290012:+	circERC1-1	ERC1	hsa-miR-133a-3p	ENSG00000143952	VPS54	0
chr12-1411392	rs80018118	chr12_1263034_1290012:+	circERC1-1	ERC1	hsa-miR-133b	ENSG00000143952	VPS54	0
chr12-1420263	rs117601704	chr12_1263034_1290012:+	circERC1-1	ERC1	hsa-miR-133a-3p	ENSG00000143952	VPS54	0
chr12-1420263	rs117601704	chr12_1263034_1290012:+	circERC1-1	ERC1	hsa-miR-133b	ENSG00000143952	VPS54	0
chr12-1328345	rs79543065	chr12_1263034_1290012:+	circERC1-1	ERC1	hsa-miR-133a-3p	ENSG00000143995	MEIS1	0
chr12-1328345	rs79543065	chr12_1263034_1290012:+	circERC1-1	ERC1	hsa-miR-133b	ENSG00000143995	MEIS1	0
chr12-1411392	rs80018118	chr12_1263034_1290012:+	circERC1-1	ERC1	hsa-miR-133a-3p	ENSG00000143995	MEIS1	0
chr12-1411392	rs80018118	chr12_1263034_1290012:+	circERC1-1	ERC1	hsa-miR-133b	ENSG00000143995	MEIS1	0
chr12-1420263	rs117601704	chr12_1263034_1290012:+	circERC1-1	ERC1	hsa-miR-133a-3p	ENSG00000143995	MEIS1	0
chr12-1420263	rs117601704	chr12_1263034_1290012:+	circERC1-1	ERC1	hsa-miR-133b	ENSG00000143995	MEIS1	0
chr12-1328345	rs79543065	chr12_1263034_1290012:+	circERC1-1	ERC1	hsa-miR-29a-3p	ENSG00000145375	SPATA5	0
chr12-1328345	rs79543065	chr12_1263034_1290012:+	circERC1-1	ERC1	hsa-miR-29b-3p	ENSG00000145375	SPATA5	0
chr12-1328345	rs79543065	chr12_1263034_1290012:+	circERC1-1	ERC1	hsa-miR-29c-3p	ENSG00000145375	SPATA5	0
chr12-1411392	rs80018118	chr12_1263034_1290012:+	circERC1-1	ERC1	hsa-miR-29a-3p	ENSG00000145375	SPATA5	0
chr12-1411392	rs80018118	chr12_1263034_1290012:+	circERC1-1	ERC1	hsa-miR-29b-3p	ENSG00000145375	SPATA5	0
chr12-1411392	rs80018118	chr12_1263034_1290012:+	circERC1-1	ERC1	hsa-miR-29c-3p	ENSG00000145375	SPATA5	0
chr12-1420263	rs117601704	chr12_1263034_1290012:+	circERC1-1	ERC1	hsa-miR-29a-3p	ENSG00000145375	SPATA5	0
chr12-1420263	rs117601704	chr12_1263034_1290012:+	circERC1-1	ERC1	hsa-miR-29b-3p	ENSG00000145375	SPATA5	0
chr12-1420263	rs117601704	chr12_1263034_1290012:+	circERC1-1	ERC1	hsa-miR-29c-3p	ENSG00000145375	SPATA5	0
chr12-1411392	rs80018118	chr12_1263034_1290012:+	circERC1-1	ERC1	hsa-miR-133b	ENSG00000146247	PHIP	0
chr12-1328345	rs79543065	chr12_1263034_1290012:+	circERC1-1	ERC1	hsa-miR-29a-3p	ENSG00000147894	C9orf72	1
chr12-1328345	rs79543065	chr12_1263034_1290012:+	circERC1-1	ERC1	hsa-miR-29b-3p	ENSG00000147894	C9orf72	1
chr12-1328345	rs79543065	chr12_1263034_1290012:+	circERC1-1	ERC1	hsa-miR-29c-3p	ENSG00000147894	C9orf72	1
chr12-1411392	rs80018118	chr12_1263034_1290012:+	circERC1-1	ERC1	hsa-miR-29a-3p	ENSG00000147894	C9orf72	1
chr12-1411392	rs80018118	chr12_1263034_1290012:+	circERC1-1	ERC1	hsa-miR-29b-3p	ENSG00000147894	C9orf72	1
chr12-1411392	rs80018118	chr12_1263034_1290012:+	circERC1-1	ERC1	hsa-miR-29c-3p	ENSG00000147894	C9orf72	1
chr12-1420263	rs117601704	chr12_1263034_1290012:+	circERC1-1	ERC1	hsa-miR-29a-3p	ENSG00000147894	C9orf72	1
chr12-1420263	rs117601704	chr12_1263034_1290012:+	circERC1-1	ERC1	hsa-miR-29b-3p	ENSG00000147894	C9orf72	1
chr12-1420263	rs117601704	chr12_1263034_1290012:+	circERC1-1	ERC1	hsa-miR-29c-3p	ENSG00000147894	C9orf72	1
chr12-1328345	rs79543065	chr12_1263034_1290012:+	circERC1-1	ERC1	hsa-miR-133a-3p	ENSG00000148943	LIN7C	0
chr12-1328345	rs79543065	chr12_1263034_1290012:+	circERC1-1	ERC1	hsa-miR-133b	ENSG00000148943	LIN7C	0
chr12-1411392	rs80018118	chr12_1263034_1290012:+	circERC1-1	ERC1	hsa-miR-133a-3p	ENSG00000148943	LIN7C	0
chr12-1411392	rs80018118	chr12_1263034_1290012:+	circERC1-1	ERC1	hsa-miR-133b	ENSG00000148943	LIN7C	0
chr12-1420263	rs117601704	chr12_1263034_1290012:+	circERC1-1	ERC1	hsa-miR-133a-3p	ENSG00000148943	LIN7C	0
chr12-1420263	rs117601704	chr12_1263034_1290012:+	circERC1-1	ERC1	hsa-miR-133b	ENSG00000148943	LIN7C	0
chr12-1328345	rs79543065	chr12_1263034_1290012:+	circERC1-1	ERC1	hsa-miR-133a-3p	ENSG00000149639	SOGA1	0
chr12-1328345	rs79543065	chr12_1263034_1290012:+	circERC1-1	ERC1	hsa-miR-133b	ENSG00000149639	SOGA1	0
chr12-1328345	rs79543065	chr12_1263034_1290012:+	circERC1-1	ERC1	hsa-miR-29a-3p	ENSG00000149639	SOGA1	0
chr12-1328345	rs79543065	chr12_1263034_1290012:+	circERC1-1	ERC1	hsa-miR-29b-3p	ENSG00000149639	SOGA1	0
chr12-1328345	rs79543065	chr12_1263034_1290012:+	circERC1-1	ERC1	hsa-miR-29c-3p	ENSG00000149639	SOGA1	0
chr12-1411392	rs80018118	chr12_1263034_1290012:+	circERC1-1	ERC1	hsa-miR-133a-3p	ENSG00000149639	SOGA1	0
chr12-1411392	rs80018118	chr12_1263034_1290012:+	circERC1-1	ERC1	hsa-miR-133b	ENSG00000149639	SOGA1	0
chr12-1411392	rs80018118	chr12_1263034_1290012:+	circERC1-1	ERC1	hsa-miR-29a-3p	ENSG00000149639	SOGA1	0
chr12-1411392	rs80018118	chr12_1263034_1290012:+	circERC1-1	ERC1	hsa-miR-29b-3p	ENSG00000149639	SOGA1	0
chr12-1411392	rs80018118	chr12_1263034_1290012:+	circERC1-1	ERC1	hsa-miR-29c-3p	ENSG00000149639	SOGA1	0
chr12-1420263	rs117601704	chr12_1263034_1290012:+	circERC1-1	ERC1	hsa-miR-133a-3p	ENSG00000149639	SOGA1	0
chr12-1420263	rs117601704	chr12_1263034_1290012:+	circERC1-1	ERC1	hsa-miR-133b	ENSG00000149639	SOGA1	0
chr12-1420263	rs117601704	chr12_1263034_1290012:+	circERC1-1	ERC1	hsa-miR-29a-3p	ENSG00000149639	SOGA1	0
chr12-1420263	rs117601704	chr12_1263034_1290012:+	circERC1-1	ERC1	hsa-miR-29b-3p	ENSG00000149639	SOGA1	0
chr12-1420263	rs117601704	chr12_1263034_1290012:+	circERC1-1	ERC1	hsa-miR-29c-3p	ENSG00000149639	SOGA1	0
chr12-1328345	rs79543065	chr12_1263034_1290012:+	circERC1-1	ERC1	hsa-miR-29a-3p	ENSG00000151364	KCTD14	0
chr12-1328345	rs79543065	chr12_1263034_1290012:+	circERC1-1	ERC1	hsa-miR-29b-3p	ENSG00000151364	KCTD14	0
chr12-1328345	rs79543065	chr12_1263034_1290012:+	circERC1-1	ERC1	hsa-miR-29c-3p	ENSG00000151364	KCTD14	0
chr12-1411392	rs80018118	chr12_1263034_1290012:+	circERC1-1	ERC1	hsa-miR-29a-3p	ENSG00000151364	KCTD14	0
chr12-1411392	rs80018118	chr12_1263034_1290012:+	circERC1-1	ERC1	hsa-miR-29b-3p	ENSG00000151364	KCTD14	0
chr12-1411392	rs80018118	chr12_1263034_1290012:+	circERC1-1	ERC1	hsa-miR-29c-3p	ENSG00000151364	KCTD14	0
chr12-1420263	rs117601704	chr12_1263034_1290012:+	circERC1-1	ERC1	hsa-miR-29a-3p	ENSG00000151364	KCTD14	0
chr12-1420263	rs117601704	chr12_1263034_1290012:+	circERC1-1	ERC1	hsa-miR-29b-3p	ENSG00000151364	KCTD14	0
chr12-1420263	rs117601704	chr12_1263034_1290012:+	circERC1-1	ERC1	hsa-miR-29c-3p	ENSG00000151364	KCTD14	0
chr12-1328345	rs79543065	chr12_1263034_1290012:+	circERC1-1	ERC1	hsa-miR-133a-3p	ENSG00000151746	BICD1	0
chr12-1328345	rs79543065	chr12_1263034_1290012:+	circERC1-1	ERC1	hsa-miR-133b	ENSG00000151746	BICD1	0
chr12-1328345	rs79543065	chr12_1263034_1290012:+	circERC1-1	ERC1	hsa-miR-29a-3p	ENSG00000151746	BICD1	0
chr12-1328345	rs79543065	chr12_1263034_1290012:+	circERC1-1	ERC1	hsa-miR-29b-3p	ENSG00000151746	BICD1	0
chr12-1328345	rs79543065	chr12_1263034_1290012:+	circERC1-1	ERC1	hsa-miR-29c-3p	ENSG00000151746	BICD1	0
chr12-1411392	rs80018118	chr12_1263034_1290012:+	circERC1-1	ERC1	hsa-miR-133a-3p	ENSG00000151746	BICD1	0
chr12-1411392	rs80018118	chr12_1263034_1290012:+	circERC1-1	ERC1	hsa-miR-133b	ENSG00000151746	BICD1	0
chr12-1411392	rs80018118	chr12_1263034_1290012:+	circERC1-1	ERC1	hsa-miR-29a-3p	ENSG00000151746	BICD1	0
chr12-1411392	rs80018118	chr12_1263034_1290012:+	circERC1-1	ERC1	hsa-miR-29b-3p	ENSG00000151746	BICD1	0
chr12-1411392	rs80018118	chr12_1263034_1290012:+	circERC1-1	ERC1	hsa-miR-29c-3p	ENSG00000151746	BICD1	0
chr12-1420263	rs117601704	chr12_1263034_1290012:+	circERC1-1	ERC1	hsa-miR-133a-3p	ENSG00000151746	BICD1	0
chr12-1420263	rs117601704	chr12_1263034_1290012:+	circERC1-1	ERC1	hsa-miR-133b	ENSG00000151746	BICD1	0
chr12-1420263	rs117601704	chr12_1263034_1290012:+	circERC1-1	ERC1	hsa-miR-29a-3p	ENSG00000151746	BICD1	0
chr12-1420263	rs117601704	chr12_1263034_1290012:+	circERC1-1	ERC1	hsa-miR-29b-3p	ENSG00000151746	BICD1	0
chr12-1420263	rs117601704	chr12_1263034_1290012:+	circERC1-1	ERC1	hsa-miR-29c-3p	ENSG00000151746	BICD1	0
chr12-1328345	rs79543065	chr12_1263034_1290012:+	circERC1-1	ERC1	hsa-miR-29a-3p	ENSG00000152495	CAMK4	0
chr12-1328345	rs79543065	chr12_1263034_1290012:+	circERC1-1	ERC1	hsa-miR-29b-3p	ENSG00000152495	CAMK4	0
chr12-1328345	rs79543065	chr12_1263034_1290012:+	circERC1-1	ERC1	hsa-miR-29c-3p	ENSG00000152495	CAMK4	0
chr12-1411392	rs80018118	chr12_1263034_1290012:+	circERC1-1	ERC1	hsa-miR-29a-3p	ENSG00000152495	CAMK4	0
chr12-1411392	rs80018118	chr12_1263034_1290012:+	circERC1-1	ERC1	hsa-miR-29b-3p	ENSG00000152495	CAMK4	0
chr12-1411392	rs80018118	chr12_1263034_1290012:+	circERC1-1	ERC1	hsa-miR-29c-3p	ENSG00000152495	CAMK4	0
chr12-1420263	rs117601704	chr12_1263034_1290012:+	circERC1-1	ERC1	hsa-miR-29a-3p	ENSG00000152495	CAMK4	0
chr12-1420263	rs117601704	chr12_1263034_1290012:+	circERC1-1	ERC1	hsa-miR-29b-3p	ENSG00000152495	CAMK4	0
chr12-1420263	rs117601704	chr12_1263034_1290012:+	circERC1-1	ERC1	hsa-miR-29c-3p	ENSG00000152495	CAMK4	0
chr12-1328345	rs79543065	chr12_1263034_1290012:+	circERC1-1	ERC1	hsa-miR-133a-3p	ENSG00000152520	PAN3	0
chr12-1328345	rs79543065	chr12_1263034_1290012:+	circERC1-1	ERC1	hsa-miR-133b	ENSG00000152520	PAN3	0
chr12-1328345	rs79543065	chr12_1263034_1290012:+	circERC1-1	ERC1	hsa-miR-29a-3p	ENSG00000152520	PAN3	0
chr12-1328345	rs79543065	chr12_1263034_1290012:+	circERC1-1	ERC1	hsa-miR-29b-3p	ENSG00000152520	PAN3	0
chr12-1328345	rs79543065	chr12_1263034_1290012:+	circERC1-1	ERC1	hsa-miR-29c-3p	ENSG00000152520	PAN3	0
chr12-1411392	rs80018118	chr12_1263034_1290012:+	circERC1-1	ERC1	hsa-miR-133a-3p	ENSG00000152520	PAN3	0
chr12-1411392	rs80018118	chr12_1263034_1290012:+	circERC1-1	ERC1	hsa-miR-133b	ENSG00000152520	PAN3	0
chr12-1411392	rs80018118	chr12_1263034_1290012:+	circERC1-1	ERC1	hsa-miR-29a-3p	ENSG00000152520	PAN3	0
chr12-1411392	rs80018118	chr12_1263034_1290012:+	circERC1-1	ERC1	hsa-miR-29b-3p	ENSG00000152520	PAN3	0
chr12-1411392	rs80018118	chr12_1263034_1290012:+	circERC1-1	ERC1	hsa-miR-29c-3p	ENSG00000152520	PAN3	0
chr12-1420263	rs117601704	chr12_1263034_1290012:+	circERC1-1	ERC1	hsa-miR-133a-3p	ENSG00000152520	PAN3	0
chr12-1420263	rs117601704	chr12_1263034_1290012:+	circERC1-1	ERC1	hsa-miR-133b	ENSG00000152520	PAN3	0
chr12-1420263	rs117601704	chr12_1263034_1290012:+	circERC1-1	ERC1	hsa-miR-29a-3p	ENSG00000152520	PAN3	0
chr12-1420263	rs117601704	chr12_1263034_1290012:+	circERC1-1	ERC1	hsa-miR-29b-3p	ENSG00000152520	PAN3	0
chr12-1420263	rs117601704	chr12_1263034_1290012:+	circERC1-1	ERC1	hsa-miR-29c-3p	ENSG00000152520	PAN3	0
chr12-1328345	rs79543065	chr12_1263034_1290012:+	circERC1-1	ERC1	hsa-miR-29a-3p	ENSG00000152782	PANK1	0
chr12-1328345	rs79543065	chr12_1263034_1290012:+	circERC1-1	ERC1	hsa-miR-29b-3p	ENSG00000152782	PANK1	0
chr12-1328345	rs79543065	chr12_1263034_1290012:+	circERC1-1	ERC1	hsa-miR-29c-3p	ENSG00000152782	PANK1	0
chr12-1411392	rs80018118	chr12_1263034_1290012:+	circERC1-1	ERC1	hsa-miR-29a-3p	ENSG00000152782	PANK1	0
chr12-1411392	rs80018118	chr12_1263034_1290012:+	circERC1-1	ERC1	hsa-miR-29b-3p	ENSG00000152782	PANK1	0
chr12-1411392	rs80018118	chr12_1263034_1290012:+	circERC1-1	ERC1	hsa-miR-29c-3p	ENSG00000152782	PANK1	0
chr12-1420263	rs117601704	chr12_1263034_1290012:+	circERC1-1	ERC1	hsa-miR-29a-3p	ENSG00000152782	PANK1	0
chr12-1420263	rs117601704	chr12_1263034_1290012:+	circERC1-1	ERC1	hsa-miR-29b-3p	ENSG00000152782	PANK1	0
chr12-1420263	rs117601704	chr12_1263034_1290012:+	circERC1-1	ERC1	hsa-miR-29c-3p	ENSG00000152782	PANK1	0
chr12-1328345	rs79543065	chr12_1263034_1290012:+	circERC1-1	ERC1	hsa-miR-133a-3p	ENSG00000153561	RMND5A	0
chr12-1328345	rs79543065	chr12_1263034_1290012:+	circERC1-1	ERC1	hsa-miR-133b	ENSG00000153561	RMND5A	0
chr12-1328345	rs79543065	chr12_1263034_1290012:+	circERC1-1	ERC1	hsa-miR-29a-3p	ENSG00000153561	RMND5A	0
chr12-1328345	rs79543065	chr12_1263034_1290012:+	circERC1-1	ERC1	hsa-miR-29b-3p	ENSG00000153561	RMND5A	0
chr12-1328345	rs79543065	chr12_1263034_1290012:+	circERC1-1	ERC1	hsa-miR-29c-3p	ENSG00000153561	RMND5A	0
chr12-1411392	rs80018118	chr12_1263034_1290012:+	circERC1-1	ERC1	hsa-miR-133a-3p	ENSG00000153561	RMND5A	0
chr12-1411392	rs80018118	chr12_1263034_1290012:+	circERC1-1	ERC1	hsa-miR-133b	ENSG00000153561	RMND5A	0
chr12-1411392	rs80018118	chr12_1263034_1290012:+	circERC1-1	ERC1	hsa-miR-29a-3p	ENSG00000153561	RMND5A	0
chr12-1411392	rs80018118	chr12_1263034_1290012:+	circERC1-1	ERC1	hsa-miR-29b-3p	ENSG00000153561	RMND5A	0
chr12-1411392	rs80018118	chr12_1263034_1290012:+	circERC1-1	ERC1	hsa-miR-29c-3p	ENSG00000153561	RMND5A	0
chr12-1420263	rs117601704	chr12_1263034_1290012:+	circERC1-1	ERC1	hsa-miR-133a-3p	ENSG00000153561	RMND5A	0
chr12-1420263	rs117601704	chr12_1263034_1290012:+	circERC1-1	ERC1	hsa-miR-133b	ENSG00000153561	RMND5A	0
chr12-1420263	rs117601704	chr12_1263034_1290012:+	circERC1-1	ERC1	hsa-miR-29a-3p	ENSG00000153561	RMND5A	0
chr12-1420263	rs117601704	chr12_1263034_1290012:+	circERC1-1	ERC1	hsa-miR-29b-3p	ENSG00000153561	RMND5A	0
chr12-1420263	rs117601704	chr12_1263034_1290012:+	circERC1-1	ERC1	hsa-miR-29c-3p	ENSG00000153561	RMND5A	0
chr12-1328345	rs79543065	chr12_1263034_1290012:+	circERC1-1	ERC1	hsa-miR-133a-3p	ENSG00000154736	ADAMTS5	0
chr12-1328345	rs79543065	chr12_1263034_1290012:+	circERC1-1	ERC1	hsa-miR-133b	ENSG00000154736	ADAMTS5	0
chr12-1411392	rs80018118	chr12_1263034_1290012:+	circERC1-1	ERC1	hsa-miR-133a-3p	ENSG00000154736	ADAMTS5	0
chr12-1411392	rs80018118	chr12_1263034_1290012:+	circERC1-1	ERC1	hsa-miR-133b	ENSG00000154736	ADAMTS5	0
chr12-1420263	rs117601704	chr12_1263034_1290012:+	circERC1-1	ERC1	hsa-miR-133a-3p	ENSG00000154736	ADAMTS5	0
chr12-1420263	rs117601704	chr12_1263034_1290012:+	circERC1-1	ERC1	hsa-miR-133b	ENSG00000154736	ADAMTS5	0
chr12-1328345	rs79543065	chr12_1263034_1290012:+	circERC1-1	ERC1	hsa-miR-133a-3p	ENSG00000154822	PLCL2	1
chr12-1328345	rs79543065	chr12_1263034_1290012:+	circERC1-1	ERC1	hsa-miR-133b	ENSG00000154822	PLCL2	1
chr12-1411392	rs80018118	chr12_1263034_1290012:+	circERC1-1	ERC1	hsa-miR-133a-3p	ENSG00000154822	PLCL2	1
chr12-1411392	rs80018118	chr12_1263034_1290012:+	circERC1-1	ERC1	hsa-miR-133b	ENSG00000154822	PLCL2	1
chr12-1420263	rs117601704	chr12_1263034_1290012:+	circERC1-1	ERC1	hsa-miR-133a-3p	ENSG00000154822	PLCL2	1
chr12-1420263	rs117601704	chr12_1263034_1290012:+	circERC1-1	ERC1	hsa-miR-133b	ENSG00000154822	PLCL2	1
chr12-1328345	rs79543065	chr12_1263034_1290012:+	circERC1-1	ERC1	hsa-miR-133a-3p	ENSG00000155545	MIER3	0
chr12-1328345	rs79543065	chr12_1263034_1290012:+	circERC1-1	ERC1	hsa-miR-133b	ENSG00000155545	MIER3	0
chr12-1328345	rs79543065	chr12_1263034_1290012:+	circERC1-1	ERC1	hsa-miR-29a-3p	ENSG00000155545	MIER3	0
chr12-1328345	rs79543065	chr12_1263034_1290012:+	circERC1-1	ERC1	hsa-miR-29b-3p	ENSG00000155545	MIER3	0
chr12-1328345	rs79543065	chr12_1263034_1290012:+	circERC1-1	ERC1	hsa-miR-29c-3p	ENSG00000155545	MIER3	0
chr12-1411392	rs80018118	chr12_1263034_1290012:+	circERC1-1	ERC1	hsa-miR-133a-3p	ENSG00000155545	MIER3	0
chr12-1411392	rs80018118	chr12_1263034_1290012:+	circERC1-1	ERC1	hsa-miR-133b	ENSG00000155545	MIER3	0
chr12-1411392	rs80018118	chr12_1263034_1290012:+	circERC1-1	ERC1	hsa-miR-29a-3p	ENSG00000155545	MIER3	0
chr12-1411392	rs80018118	chr12_1263034_1290012:+	circERC1-1	ERC1	hsa-miR-29b-3p	ENSG00000155545	MIER3	0
chr12-1411392	rs80018118	chr12_1263034_1290012:+	circERC1-1	ERC1	hsa-miR-29c-3p	ENSG00000155545	MIER3	0
chr12-1420263	rs117601704	chr12_1263034_1290012:+	circERC1-1	ERC1	hsa-miR-133a-3p	ENSG00000155545	MIER3	0
chr12-1420263	rs117601704	chr12_1263034_1290012:+	circERC1-1	ERC1	hsa-miR-133b	ENSG00000155545	MIER3	0
chr12-1420263	rs117601704	chr12_1263034_1290012:+	circERC1-1	ERC1	hsa-miR-29a-3p	ENSG00000155545	MIER3	0
chr12-1420263	rs117601704	chr12_1263034_1290012:+	circERC1-1	ERC1	hsa-miR-29b-3p	ENSG00000155545	MIER3	0
chr12-1420263	rs117601704	chr12_1263034_1290012:+	circERC1-1	ERC1	hsa-miR-29c-3p	ENSG00000155545	MIER3	0
chr12-1328345	rs79543065	chr12_1263034_1290012:+	circERC1-1	ERC1	hsa-miR-133a-3p	ENSG00000155561	NUP205	0
chr12-1328345	rs79543065	chr12_1263034_1290012:+	circERC1-1	ERC1	hsa-miR-133b	ENSG00000155561	NUP205	0
chr12-1411392	rs80018118	chr12_1263034_1290012:+	circERC1-1	ERC1	hsa-miR-133a-3p	ENSG00000155561	NUP205	0
chr12-1411392	rs80018118	chr12_1263034_1290012:+	circERC1-1	ERC1	hsa-miR-133b	ENSG00000155561	NUP205	0
chr12-1420263	rs117601704	chr12_1263034_1290012:+	circERC1-1	ERC1	hsa-miR-133a-3p	ENSG00000155561	NUP205	0
chr12-1420263	rs117601704	chr12_1263034_1290012:+	circERC1-1	ERC1	hsa-miR-133b	ENSG00000155561	NUP205	0
chr12-1328345	rs79543065	chr12_1263034_1290012:+	circERC1-1	ERC1	hsa-miR-29a-3p	ENSG00000156026	MCU	0
chr12-1328345	rs79543065	chr12_1263034_1290012:+	circERC1-1	ERC1	hsa-miR-29b-3p	ENSG00000156026	MCU	0
chr12-1328345	rs79543065	chr12_1263034_1290012:+	circERC1-1	ERC1	hsa-miR-29c-3p	ENSG00000156026	MCU	0
chr12-1411392	rs80018118	chr12_1263034_1290012:+	circERC1-1	ERC1	hsa-miR-29a-3p	ENSG00000156026	MCU	0
chr12-1411392	rs80018118	chr12_1263034_1290012:+	circERC1-1	ERC1	hsa-miR-29b-3p	ENSG00000156026	MCU	0
chr12-1411392	rs80018118	chr12_1263034_1290012:+	circERC1-1	ERC1	hsa-miR-29c-3p	ENSG00000156026	MCU	0
chr12-1420263	rs117601704	chr12_1263034_1290012:+	circERC1-1	ERC1	hsa-miR-29a-3p	ENSG00000156026	MCU	0
chr12-1420263	rs117601704	chr12_1263034_1290012:+	circERC1-1	ERC1	hsa-miR-29b-3p	ENSG00000156026	MCU	0
chr12-1420263	rs117601704	chr12_1263034_1290012:+	circERC1-1	ERC1	hsa-miR-29c-3p	ENSG00000156026	MCU	0
chr12-1328345	rs79543065	chr12_1263034_1290012:+	circERC1-1	ERC1	hsa-miR-29a-3p	ENSG00000156299	TIAM1	0
chr12-1328345	rs79543065	chr12_1263034_1290012:+	circERC1-1	ERC1	hsa-miR-29b-3p	ENSG00000156299	TIAM1	0
chr12-1328345	rs79543065	chr12_1263034_1290012:+	circERC1-1	ERC1	hsa-miR-29c-3p	ENSG00000156299	TIAM1	0
chr12-1411392	rs80018118	chr12_1263034_1290012:+	circERC1-1	ERC1	hsa-miR-29a-3p	ENSG00000156299	TIAM1	0
chr12-1411392	rs80018118	chr12_1263034_1290012:+	circERC1-1	ERC1	hsa-miR-29b-3p	ENSG00000156299	TIAM1	0
chr12-1411392	rs80018118	chr12_1263034_1290012:+	circERC1-1	ERC1	hsa-miR-29c-3p	ENSG00000156299	TIAM1	0
chr12-1420263	rs117601704	chr12_1263034_1290012:+	circERC1-1	ERC1	hsa-miR-29a-3p	ENSG00000156299	TIAM1	0
chr12-1420263	rs117601704	chr12_1263034_1290012:+	circERC1-1	ERC1	hsa-miR-29b-3p	ENSG00000156299	TIAM1	0
chr12-1420263	rs117601704	chr12_1263034_1290012:+	circERC1-1	ERC1	hsa-miR-29c-3p	ENSG00000156299	TIAM1	0
chr12-1328345	rs79543065	chr12_1263034_1290012:+	circERC1-1	ERC1	hsa-miR-29a-3p	ENSG00000156787	TBC1D31	0
chr12-1328345	rs79543065	chr12_1263034_1290012:+	circERC1-1	ERC1	hsa-miR-29b-3p	ENSG00000156787	TBC1D31	0
chr12-1328345	rs79543065	chr12_1263034_1290012:+	circERC1-1	ERC1	hsa-miR-29c-3p	ENSG00000156787	TBC1D31	0
chr12-1411392	rs80018118	chr12_1263034_1290012:+	circERC1-1	ERC1	hsa-miR-29a-3p	ENSG00000156787	TBC1D31	0
chr12-1411392	rs80018118	chr12_1263034_1290012:+	circERC1-1	ERC1	hsa-miR-29b-3p	ENSG00000156787	TBC1D31	0
chr12-1411392	rs80018118	chr12_1263034_1290012:+	circERC1-1	ERC1	hsa-miR-29c-3p	ENSG00000156787	TBC1D31	0
chr12-1420263	rs117601704	chr12_1263034_1290012:+	circERC1-1	ERC1	hsa-miR-29a-3p	ENSG00000156787	TBC1D31	0
chr12-1420263	rs117601704	chr12_1263034_1290012:+	circERC1-1	ERC1	hsa-miR-29b-3p	ENSG00000156787	TBC1D31	0
chr12-1420263	rs117601704	chr12_1263034_1290012:+	circERC1-1	ERC1	hsa-miR-29c-3p	ENSG00000156787	TBC1D31	0
chr12-1328345	rs79543065	chr12_1263034_1290012:+	circERC1-1	ERC1	hsa-miR-133a-3p	ENSG00000157570	TSPAN18	0
chr12-1328345	rs79543065	chr12_1263034_1290012:+	circERC1-1	ERC1	hsa-miR-133b	ENSG00000157570	TSPAN18	0
chr12-1411392	rs80018118	chr12_1263034_1290012:+	circERC1-1	ERC1	hsa-miR-133a-3p	ENSG00000157570	TSPAN18	0
chr12-1411392	rs80018118	chr12_1263034_1290012:+	circERC1-1	ERC1	hsa-miR-133b	ENSG00000157570	TSPAN18	0
chr12-1420263	rs117601704	chr12_1263034_1290012:+	circERC1-1	ERC1	hsa-miR-133a-3p	ENSG00000157570	TSPAN18	0
chr12-1420263	rs117601704	chr12_1263034_1290012:+	circERC1-1	ERC1	hsa-miR-133b	ENSG00000157570	TSPAN18	0
chr12-1328345	rs79543065	chr12_1263034_1290012:+	circERC1-1	ERC1	hsa-miR-133a-3p	ENSG00000157657	ZNF618	0
chr12-1328345	rs79543065	chr12_1263034_1290012:+	circERC1-1	ERC1	hsa-miR-133b	ENSG00000157657	ZNF618	0
chr12-1328345	rs79543065	chr12_1263034_1290012:+	circERC1-1	ERC1	hsa-miR-29a-3p	ENSG00000157657	ZNF618	0
chr12-1328345	rs79543065	chr12_1263034_1290012:+	circERC1-1	ERC1	hsa-miR-29b-3p	ENSG00000157657	ZNF618	0
chr12-1328345	rs79543065	chr12_1263034_1290012:+	circERC1-1	ERC1	hsa-miR-29c-3p	ENSG00000157657	ZNF618	0
chr12-1411392	rs80018118	chr12_1263034_1290012:+	circERC1-1	ERC1	hsa-miR-133a-3p	ENSG00000157657	ZNF618	0
chr12-1411392	rs80018118	chr12_1263034_1290012:+	circERC1-1	ERC1	hsa-miR-133b	ENSG00000157657	ZNF618	0
chr12-1411392	rs80018118	chr12_1263034_1290012:+	circERC1-1	ERC1	hsa-miR-29a-3p	ENSG00000157657	ZNF618	0
chr12-1411392	rs80018118	chr12_1263034_1290012:+	circERC1-1	ERC1	hsa-miR-29b-3p	ENSG00000157657	ZNF618	0
chr12-1411392	rs80018118	chr12_1263034_1290012:+	circERC1-1	ERC1	hsa-miR-29c-3p	ENSG00000157657	ZNF618	0
chr12-1420263	rs117601704	chr12_1263034_1290012:+	circERC1-1	ERC1	hsa-miR-133a-3p	ENSG00000157657	ZNF618	0
chr12-1420263	rs117601704	chr12_1263034_1290012:+	circERC1-1	ERC1	hsa-miR-133b	ENSG00000157657	ZNF618	0
chr12-1420263	rs117601704	chr12_1263034_1290012:+	circERC1-1	ERC1	hsa-miR-29a-3p	ENSG00000157657	ZNF618	0
chr12-1420263	rs117601704	chr12_1263034_1290012:+	circERC1-1	ERC1	hsa-miR-29b-3p	ENSG00000157657	ZNF618	0
chr12-1420263	rs117601704	chr12_1263034_1290012:+	circERC1-1	ERC1	hsa-miR-29c-3p	ENSG00000157657	ZNF618	0
chr12-1328345	rs79543065	chr12_1263034_1290012:+	circERC1-1	ERC1	hsa-miR-29a-3p	ENSG00000157933	SKI	0
chr12-1328345	rs79543065	chr12_1263034_1290012:+	circERC1-1	ERC1	hsa-miR-29b-3p	ENSG00000157933	SKI	0
chr12-1328345	rs79543065	chr12_1263034_1290012:+	circERC1-1	ERC1	hsa-miR-29c-3p	ENSG00000157933	SKI	0
chr12-1411392	rs80018118	chr12_1263034_1290012:+	circERC1-1	ERC1	hsa-miR-29a-3p	ENSG00000157933	SKI	0
chr12-1411392	rs80018118	chr12_1263034_1290012:+	circERC1-1	ERC1	hsa-miR-29b-3p	ENSG00000157933	SKI	0
chr12-1411392	rs80018118	chr12_1263034_1290012:+	circERC1-1	ERC1	hsa-miR-29c-3p	ENSG00000157933	SKI	0
chr12-1420263	rs117601704	chr12_1263034_1290012:+	circERC1-1	ERC1	hsa-miR-29a-3p	ENSG00000157933	SKI	0
chr12-1420263	rs117601704	chr12_1263034_1290012:+	circERC1-1	ERC1	hsa-miR-29b-3p	ENSG00000157933	SKI	0
chr12-1420263	rs117601704	chr12_1263034_1290012:+	circERC1-1	ERC1	hsa-miR-29c-3p	ENSG00000157933	SKI	0
chr12-1328345	rs79543065	chr12_1263034_1290012:+	circERC1-1	ERC1	hsa-miR-133a-3p	ENSG00000157978	LDLRAP1	0
chr12-1328345	rs79543065	chr12_1263034_1290012:+	circERC1-1	ERC1	hsa-miR-133b	ENSG00000157978	LDLRAP1	0
chr12-1328345	rs79543065	chr12_1263034_1290012:+	circERC1-1	ERC1	hsa-miR-29a-3p	ENSG00000157978	LDLRAP1	0
chr12-1328345	rs79543065	chr12_1263034_1290012:+	circERC1-1	ERC1	hsa-miR-29b-3p	ENSG00000157978	LDLRAP1	0
chr12-1328345	rs79543065	chr12_1263034_1290012:+	circERC1-1	ERC1	hsa-miR-29c-3p	ENSG00000157978	LDLRAP1	0
chr12-1411392	rs80018118	chr12_1263034_1290012:+	circERC1-1	ERC1	hsa-miR-133a-3p	ENSG00000157978	LDLRAP1	0
chr12-1411392	rs80018118	chr12_1263034_1290012:+	circERC1-1	ERC1	hsa-miR-133b	ENSG00000157978	LDLRAP1	0
chr12-1411392	rs80018118	chr12_1263034_1290012:+	circERC1-1	ERC1	hsa-miR-29a-3p	ENSG00000157978	LDLRAP1	0
chr12-1411392	rs80018118	chr12_1263034_1290012:+	circERC1-1	ERC1	hsa-miR-29b-3p	ENSG00000157978	LDLRAP1	0
chr12-1411392	rs80018118	chr12_1263034_1290012:+	circERC1-1	ERC1	hsa-miR-29c-3p	ENSG00000157978	LDLRAP1	0
chr12-1420263	rs117601704	chr12_1263034_1290012:+	circERC1-1	ERC1	hsa-miR-133a-3p	ENSG00000157978	LDLRAP1	0
chr12-1420263	rs117601704	chr12_1263034_1290012:+	circERC1-1	ERC1	hsa-miR-133b	ENSG00000157978	LDLRAP1	0
chr12-1420263	rs117601704	chr12_1263034_1290012:+	circERC1-1	ERC1	hsa-miR-29a-3p	ENSG00000157978	LDLRAP1	0
chr12-1420263	rs117601704	chr12_1263034_1290012:+	circERC1-1	ERC1	hsa-miR-29b-3p	ENSG00000157978	LDLRAP1	0
chr12-1420263	rs117601704	chr12_1263034_1290012:+	circERC1-1	ERC1	hsa-miR-29c-3p	ENSG00000157978	LDLRAP1	0
chr12-1328345	rs79543065	chr12_1263034_1290012:+	circERC1-1	ERC1	hsa-miR-29a-3p	ENSG00000158156	XKR8	0
chr12-1328345	rs79543065	chr12_1263034_1290012:+	circERC1-1	ERC1	hsa-miR-29b-3p	ENSG00000158156	XKR8	0
chr12-1328345	rs79543065	chr12_1263034_1290012:+	circERC1-1	ERC1	hsa-miR-29c-3p	ENSG00000158156	XKR8	0
chr12-1411392	rs80018118	chr12_1263034_1290012:+	circERC1-1	ERC1	hsa-miR-29a-3p	ENSG00000158156	XKR8	0
chr12-1411392	rs80018118	chr12_1263034_1290012:+	circERC1-1	ERC1	hsa-miR-29b-3p	ENSG00000158156	XKR8	0
chr12-1411392	rs80018118	chr12_1263034_1290012:+	circERC1-1	ERC1	hsa-miR-29c-3p	ENSG00000158156	XKR8	0
chr12-1420263	rs117601704	chr12_1263034_1290012:+	circERC1-1	ERC1	hsa-miR-29a-3p	ENSG00000158156	XKR8	0
chr12-1420263	rs117601704	chr12_1263034_1290012:+	circERC1-1	ERC1	hsa-miR-29b-3p	ENSG00000158156	XKR8	0
chr12-1420263	rs117601704	chr12_1263034_1290012:+	circERC1-1	ERC1	hsa-miR-29c-3p	ENSG00000158156	XKR8	0
chr12-1328345	rs79543065	chr12_1263034_1290012:+	circERC1-1	ERC1	hsa-miR-29a-3p	ENSG00000158169	FANCC	0
chr12-1328345	rs79543065	chr12_1263034_1290012:+	circERC1-1	ERC1	hsa-miR-29b-3p	ENSG00000158169	FANCC	0
chr12-1328345	rs79543065	chr12_1263034_1290012:+	circERC1-1	ERC1	hsa-miR-29c-3p	ENSG00000158169	FANCC	0
chr12-1411392	rs80018118	chr12_1263034_1290012:+	circERC1-1	ERC1	hsa-miR-29a-3p	ENSG00000158169	FANCC	0
chr12-1411392	rs80018118	chr12_1263034_1290012:+	circERC1-1	ERC1	hsa-miR-29b-3p	ENSG00000158169	FANCC	0
chr12-1411392	rs80018118	chr12_1263034_1290012:+	circERC1-1	ERC1	hsa-miR-29c-3p	ENSG00000158169	FANCC	0
chr12-1420263	rs117601704	chr12_1263034_1290012:+	circERC1-1	ERC1	hsa-miR-29a-3p	ENSG00000158169	FANCC	0
chr12-1420263	rs117601704	chr12_1263034_1290012:+	circERC1-1	ERC1	hsa-miR-29b-3p	ENSG00000158169	FANCC	0
chr12-1420263	rs117601704	chr12_1263034_1290012:+	circERC1-1	ERC1	hsa-miR-29c-3p	ENSG00000158169	FANCC	0
chr12-1328345	rs79543065	chr12_1263034_1290012:+	circERC1-1	ERC1	hsa-miR-29a-3p	ENSG00000158669	GPAT4	0
chr12-1328345	rs79543065	chr12_1263034_1290012:+	circERC1-1	ERC1	hsa-miR-29b-3p	ENSG00000158669	GPAT4	0
chr12-1328345	rs79543065	chr12_1263034_1290012:+	circERC1-1	ERC1	hsa-miR-29c-3p	ENSG00000158669	GPAT4	0
chr12-1411392	rs80018118	chr12_1263034_1290012:+	circERC1-1	ERC1	hsa-miR-29a-3p	ENSG00000158669	GPAT4	0
chr12-1411392	rs80018118	chr12_1263034_1290012:+	circERC1-1	ERC1	hsa-miR-29b-3p	ENSG00000158669	GPAT4	0
chr12-1411392	rs80018118	chr12_1263034_1290012:+	circERC1-1	ERC1	hsa-miR-29c-3p	ENSG00000158669	GPAT4	0
chr12-1420263	rs117601704	chr12_1263034_1290012:+	circERC1-1	ERC1	hsa-miR-29a-3p	ENSG00000158669	GPAT4	0
chr12-1420263	rs117601704	chr12_1263034_1290012:+	circERC1-1	ERC1	hsa-miR-29b-3p	ENSG00000158669	GPAT4	0
chr12-1420263	rs117601704	chr12_1263034_1290012:+	circERC1-1	ERC1	hsa-miR-29c-3p	ENSG00000158669	GPAT4	0
chr12-1328345	rs79543065	chr12_1263034_1290012:+	circERC1-1	ERC1	hsa-miR-133a-3p	ENSG00000158987	RAPGEF6	0
chr12-1328345	rs79543065	chr12_1263034_1290012:+	circERC1-1	ERC1	hsa-miR-133b	ENSG00000158987	RAPGEF6	0
chr12-1411392	rs80018118	chr12_1263034_1290012:+	circERC1-1	ERC1	hsa-miR-133a-3p	ENSG00000158987	RAPGEF6	0
chr12-1411392	rs80018118	chr12_1263034_1290012:+	circERC1-1	ERC1	hsa-miR-133b	ENSG00000158987	RAPGEF6	0
chr12-1420263	rs117601704	chr12_1263034_1290012:+	circERC1-1	ERC1	hsa-miR-133a-3p	ENSG00000158987	RAPGEF6	0
chr12-1420263	rs117601704	chr12_1263034_1290012:+	circERC1-1	ERC1	hsa-miR-133b	ENSG00000158987	RAPGEF6	0
chr12-1328345	rs79543065	chr12_1263034_1290012:+	circERC1-1	ERC1	hsa-miR-133a-3p	ENSG00000159023	EPB41	0
chr12-1328345	rs79543065	chr12_1263034_1290012:+	circERC1-1	ERC1	hsa-miR-133b	ENSG00000159023	EPB41	0
chr12-1411392	rs80018118	chr12_1263034_1290012:+	circERC1-1	ERC1	hsa-miR-133a-3p	ENSG00000159023	EPB41	0
chr12-1411392	rs80018118	chr12_1263034_1290012:+	circERC1-1	ERC1	hsa-miR-133b	ENSG00000159023	EPB41	0
chr12-1420263	rs117601704	chr12_1263034_1290012:+	circERC1-1	ERC1	hsa-miR-133a-3p	ENSG00000159023	EPB41	0
chr12-1420263	rs117601704	chr12_1263034_1290012:+	circERC1-1	ERC1	hsa-miR-133b	ENSG00000159023	EPB41	0
chr12-1328345	rs79543065	chr12_1263034_1290012:+	circERC1-1	ERC1	hsa-miR-133a-3p	ENSG00000159882	ZNF230	0
chr12-1328345	rs79543065	chr12_1263034_1290012:+	circERC1-1	ERC1	hsa-miR-133b	ENSG00000159882	ZNF230	0
chr12-1411392	rs80018118	chr12_1263034_1290012:+	circERC1-1	ERC1	hsa-miR-133a-3p	ENSG00000159882	ZNF230	0
chr12-1411392	rs80018118	chr12_1263034_1290012:+	circERC1-1	ERC1	hsa-miR-133b	ENSG00000159882	ZNF230	0
chr12-1420263	rs117601704	chr12_1263034_1290012:+	circERC1-1	ERC1	hsa-miR-133a-3p	ENSG00000159882	ZNF230	0
chr12-1420263	rs117601704	chr12_1263034_1290012:+	circERC1-1	ERC1	hsa-miR-133b	ENSG00000159882	ZNF230	0
chr12-1328345	rs79543065	chr12_1263034_1290012:+	circERC1-1	ERC1	hsa-miR-133a-3p	ENSG00000160352	ZNF714	0
chr12-1328345	rs79543065	chr12_1263034_1290012:+	circERC1-1	ERC1	hsa-miR-133b	ENSG00000160352	ZNF714	0
chr12-1328345	rs79543065	chr12_1263034_1290012:+	circERC1-1	ERC1	hsa-miR-29a-3p	ENSG00000160352	ZNF714	0
chr12-1328345	rs79543065	chr12_1263034_1290012:+	circERC1-1	ERC1	hsa-miR-29b-3p	ENSG00000160352	ZNF714	0
chr12-1328345	rs79543065	chr12_1263034_1290012:+	circERC1-1	ERC1	hsa-miR-29c-3p	ENSG00000160352	ZNF714	0
chr12-1411392	rs80018118	chr12_1263034_1290012:+	circERC1-1	ERC1	hsa-miR-133a-3p	ENSG00000160352	ZNF714	0
chr12-1411392	rs80018118	chr12_1263034_1290012:+	circERC1-1	ERC1	hsa-miR-133b	ENSG00000160352	ZNF714	0
chr12-1411392	rs80018118	chr12_1263034_1290012:+	circERC1-1	ERC1	hsa-miR-29a-3p	ENSG00000160352	ZNF714	0
chr12-1411392	rs80018118	chr12_1263034_1290012:+	circERC1-1	ERC1	hsa-miR-29b-3p	ENSG00000160352	ZNF714	0
chr12-1411392	rs80018118	chr12_1263034_1290012:+	circERC1-1	ERC1	hsa-miR-29c-3p	ENSG00000160352	ZNF714	0
chr12-1420263	rs117601704	chr12_1263034_1290012:+	circERC1-1	ERC1	hsa-miR-133a-3p	ENSG00000160352	ZNF714	0
chr12-1420263	rs117601704	chr12_1263034_1290012:+	circERC1-1	ERC1	hsa-miR-133b	ENSG00000160352	ZNF714	0
chr12-1420263	rs117601704	chr12_1263034_1290012:+	circERC1-1	ERC1	hsa-miR-29a-3p	ENSG00000160352	ZNF714	0
chr12-1420263	rs117601704	chr12_1263034_1290012:+	circERC1-1	ERC1	hsa-miR-29b-3p	ENSG00000160352	ZNF714	0
chr12-1420263	rs117601704	chr12_1263034_1290012:+	circERC1-1	ERC1	hsa-miR-29c-3p	ENSG00000160352	ZNF714	0
chr12-1328345	rs79543065	chr12_1263034_1290012:+	circERC1-1	ERC1	hsa-miR-133a-3p	ENSG00000160588	MPZL3	0
chr12-1328345	rs79543065	chr12_1263034_1290012:+	circERC1-1	ERC1	hsa-miR-133b	ENSG00000160588	MPZL3	0
chr12-1328345	rs79543065	chr12_1263034_1290012:+	circERC1-1	ERC1	hsa-miR-29a-3p	ENSG00000160588	MPZL3	0
chr12-1328345	rs79543065	chr12_1263034_1290012:+	circERC1-1	ERC1	hsa-miR-29b-3p	ENSG00000160588	MPZL3	0
chr12-1328345	rs79543065	chr12_1263034_1290012:+	circERC1-1	ERC1	hsa-miR-29c-3p	ENSG00000160588	MPZL3	0
chr12-1411392	rs80018118	chr12_1263034_1290012:+	circERC1-1	ERC1	hsa-miR-133a-3p	ENSG00000160588	MPZL3	0
chr12-1411392	rs80018118	chr12_1263034_1290012:+	circERC1-1	ERC1	hsa-miR-133b	ENSG00000160588	MPZL3	0
chr12-1411392	rs80018118	chr12_1263034_1290012:+	circERC1-1	ERC1	hsa-miR-29a-3p	ENSG00000160588	MPZL3	0
chr12-1411392	rs80018118	chr12_1263034_1290012:+	circERC1-1	ERC1	hsa-miR-29b-3p	ENSG00000160588	MPZL3	0
chr12-1411392	rs80018118	chr12_1263034_1290012:+	circERC1-1	ERC1	hsa-miR-29c-3p	ENSG00000160588	MPZL3	0
chr12-1420263	rs117601704	chr12_1263034_1290012:+	circERC1-1	ERC1	hsa-miR-133a-3p	ENSG00000160588	MPZL3	0
chr12-1420263	rs117601704	chr12_1263034_1290012:+	circERC1-1	ERC1	hsa-miR-133b	ENSG00000160588	MPZL3	0
chr12-1420263	rs117601704	chr12_1263034_1290012:+	circERC1-1	ERC1	hsa-miR-29a-3p	ENSG00000160588	MPZL3	0
chr12-1420263	rs117601704	chr12_1263034_1290012:+	circERC1-1	ERC1	hsa-miR-29b-3p	ENSG00000160588	MPZL3	0
chr12-1420263	rs117601704	chr12_1263034_1290012:+	circERC1-1	ERC1	hsa-miR-29c-3p	ENSG00000160588	MPZL3	0
chr12-1328345	rs79543065	chr12_1263034_1290012:+	circERC1-1	ERC1	hsa-miR-29b-3p	ENSG00000163050	COQ8A	0
chr12-1328345	rs79543065	chr12_1263034_1290012:+	circERC1-1	ERC1	hsa-miR-29c-3p	ENSG00000163050	COQ8A	0
chr12-1411392	rs80018118	chr12_1263034_1290012:+	circERC1-1	ERC1	hsa-miR-29b-3p	ENSG00000163050	COQ8A	0
chr12-1411392	rs80018118	chr12_1263034_1290012:+	circERC1-1	ERC1	hsa-miR-29c-3p	ENSG00000163050	COQ8A	0
chr12-1420263	rs117601704	chr12_1263034_1290012:+	circERC1-1	ERC1	hsa-miR-29b-3p	ENSG00000163050	COQ8A	0
chr12-1420263	rs117601704	chr12_1263034_1290012:+	circERC1-1	ERC1	hsa-miR-29c-3p	ENSG00000163050	COQ8A	0
chr12-1328345	rs79543065	chr12_1263034_1290012:+	circERC1-1	ERC1	hsa-miR-29a-3p	ENSG00000163064	EN1	0
chr12-1328345	rs79543065	chr12_1263034_1290012:+	circERC1-1	ERC1	hsa-miR-29b-3p	ENSG00000163064	EN1	0
chr12-1328345	rs79543065	chr12_1263034_1290012:+	circERC1-1	ERC1	hsa-miR-29c-3p	ENSG00000163064	EN1	0
chr12-1411392	rs80018118	chr12_1263034_1290012:+	circERC1-1	ERC1	hsa-miR-29a-3p	ENSG00000163064	EN1	0
chr12-1411392	rs80018118	chr12_1263034_1290012:+	circERC1-1	ERC1	hsa-miR-29b-3p	ENSG00000163064	EN1	0
chr12-1411392	rs80018118	chr12_1263034_1290012:+	circERC1-1	ERC1	hsa-miR-29c-3p	ENSG00000163064	EN1	0
chr12-1420263	rs117601704	chr12_1263034_1290012:+	circERC1-1	ERC1	hsa-miR-29a-3p	ENSG00000163064	EN1	0
chr12-1420263	rs117601704	chr12_1263034_1290012:+	circERC1-1	ERC1	hsa-miR-29b-3p	ENSG00000163064	EN1	0
chr12-1420263	rs117601704	chr12_1263034_1290012:+	circERC1-1	ERC1	hsa-miR-29c-3p	ENSG00000163064	EN1	0
chr12-1328345	rs79543065	chr12_1263034_1290012:+	circERC1-1	ERC1	hsa-miR-133a-3p	ENSG00000163701	IL17RE	0
chr12-1328345	rs79543065	chr12_1263034_1290012:+	circERC1-1	ERC1	hsa-miR-133b	ENSG00000163701	IL17RE	0
chr12-1328345	rs79543065	chr12_1263034_1290012:+	circERC1-1	ERC1	hsa-miR-29a-3p	ENSG00000163701	IL17RE	0
chr12-1328345	rs79543065	chr12_1263034_1290012:+	circERC1-1	ERC1	hsa-miR-29b-3p	ENSG00000163701	IL17RE	0
chr12-1328345	rs79543065	chr12_1263034_1290012:+	circERC1-1	ERC1	hsa-miR-29c-3p	ENSG00000163701	IL17RE	0
chr12-1411392	rs80018118	chr12_1263034_1290012:+	circERC1-1	ERC1	hsa-miR-133a-3p	ENSG00000163701	IL17RE	0
chr12-1411392	rs80018118	chr12_1263034_1290012:+	circERC1-1	ERC1	hsa-miR-133b	ENSG00000163701	IL17RE	0
chr12-1411392	rs80018118	chr12_1263034_1290012:+	circERC1-1	ERC1	hsa-miR-29a-3p	ENSG00000163701	IL17RE	0
chr12-1411392	rs80018118	chr12_1263034_1290012:+	circERC1-1	ERC1	hsa-miR-29b-3p	ENSG00000163701	IL17RE	0
chr12-1411392	rs80018118	chr12_1263034_1290012:+	circERC1-1	ERC1	hsa-miR-29c-3p	ENSG00000163701	IL17RE	0
chr12-1420263	rs117601704	chr12_1263034_1290012:+	circERC1-1	ERC1	hsa-miR-133a-3p	ENSG00000163701	IL17RE	0
chr12-1420263	rs117601704	chr12_1263034_1290012:+	circERC1-1	ERC1	hsa-miR-133b	ENSG00000163701	IL17RE	0
chr12-1420263	rs117601704	chr12_1263034_1290012:+	circERC1-1	ERC1	hsa-miR-29a-3p	ENSG00000163701	IL17RE	0
chr12-1420263	rs117601704	chr12_1263034_1290012:+	circERC1-1	ERC1	hsa-miR-29b-3p	ENSG00000163701	IL17RE	0
chr12-1420263	rs117601704	chr12_1263034_1290012:+	circERC1-1	ERC1	hsa-miR-29c-3p	ENSG00000163701	IL17RE	0
chr12-1328345	rs79543065	chr12_1263034_1290012:+	circERC1-1	ERC1	hsa-miR-133a-3p	ENSG00000163788	SNRK	1
chr12-1328345	rs79543065	chr12_1263034_1290012:+	circERC1-1	ERC1	hsa-miR-133b	ENSG00000163788	SNRK	1
chr12-1328345	rs79543065	chr12_1263034_1290012:+	circERC1-1	ERC1	hsa-miR-29a-3p	ENSG00000163788	SNRK	1
chr12-1328345	rs79543065	chr12_1263034_1290012:+	circERC1-1	ERC1	hsa-miR-29b-3p	ENSG00000163788	SNRK	1
chr12-1328345	rs79543065	chr12_1263034_1290012:+	circERC1-1	ERC1	hsa-miR-29c-3p	ENSG00000163788	SNRK	1
chr12-1411392	rs80018118	chr12_1263034_1290012:+	circERC1-1	ERC1	hsa-miR-133a-3p	ENSG00000163788	SNRK	1
chr12-1411392	rs80018118	chr12_1263034_1290012:+	circERC1-1	ERC1	hsa-miR-133b	ENSG00000163788	SNRK	1
chr12-1411392	rs80018118	chr12_1263034_1290012:+	circERC1-1	ERC1	hsa-miR-29a-3p	ENSG00000163788	SNRK	1
chr12-1411392	rs80018118	chr12_1263034_1290012:+	circERC1-1	ERC1	hsa-miR-29b-3p	ENSG00000163788	SNRK	1
chr12-1411392	rs80018118	chr12_1263034_1290012:+	circERC1-1	ERC1	hsa-miR-29c-3p	ENSG00000163788	SNRK	1
chr12-1420263	rs117601704	chr12_1263034_1290012:+	circERC1-1	ERC1	hsa-miR-133a-3p	ENSG00000163788	SNRK	1
chr12-1420263	rs117601704	chr12_1263034_1290012:+	circERC1-1	ERC1	hsa-miR-133b	ENSG00000163788	SNRK	1
chr12-1420263	rs117601704	chr12_1263034_1290012:+	circERC1-1	ERC1	hsa-miR-29a-3p	ENSG00000163788	SNRK	1
chr12-1420263	rs117601704	chr12_1263034_1290012:+	circERC1-1	ERC1	hsa-miR-29b-3p	ENSG00000163788	SNRK	1
chr12-1420263	rs117601704	chr12_1263034_1290012:+	circERC1-1	ERC1	hsa-miR-29c-3p	ENSG00000163788	SNRK	1
chr12-1328345	rs79543065	chr12_1263034_1290012:+	circERC1-1	ERC1	hsa-miR-29a-3p	ENSG00000164305	CASP3	0
chr12-1328345	rs79543065	chr12_1263034_1290012:+	circERC1-1	ERC1	hsa-miR-29b-3p	ENSG00000164305	CASP3	0
chr12-1328345	rs79543065	chr12_1263034_1290012:+	circERC1-1	ERC1	hsa-miR-29c-3p	ENSG00000164305	CASP3	0
chr12-1411392	rs80018118	chr12_1263034_1290012:+	circERC1-1	ERC1	hsa-miR-29a-3p	ENSG00000164305	CASP3	0
chr12-1411392	rs80018118	chr12_1263034_1290012:+	circERC1-1	ERC1	hsa-miR-29b-3p	ENSG00000164305	CASP3	0
chr12-1411392	rs80018118	chr12_1263034_1290012:+	circERC1-1	ERC1	hsa-miR-29c-3p	ENSG00000164305	CASP3	0
chr12-1420263	rs117601704	chr12_1263034_1290012:+	circERC1-1	ERC1	hsa-miR-29a-3p	ENSG00000164305	CASP3	0
chr12-1420263	rs117601704	chr12_1263034_1290012:+	circERC1-1	ERC1	hsa-miR-29b-3p	ENSG00000164305	CASP3	0
chr12-1420263	rs117601704	chr12_1263034_1290012:+	circERC1-1	ERC1	hsa-miR-29c-3p	ENSG00000164305	CASP3	0
chr12-1328345	rs79543065	chr12_1263034_1290012:+	circERC1-1	ERC1	hsa-miR-29a-3p	ENSG00000164542	KIAA0895	0
chr12-1328345	rs79543065	chr12_1263034_1290012:+	circERC1-1	ERC1	hsa-miR-29b-3p	ENSG00000164542	KIAA0895	0
chr12-1328345	rs79543065	chr12_1263034_1290012:+	circERC1-1	ERC1	hsa-miR-29c-3p	ENSG00000164542	KIAA0895	0
chr12-1411392	rs80018118	chr12_1263034_1290012:+	circERC1-1	ERC1	hsa-miR-29a-3p	ENSG00000164542	KIAA0895	0
chr12-1411392	rs80018118	chr12_1263034_1290012:+	circERC1-1	ERC1	hsa-miR-29b-3p	ENSG00000164542	KIAA0895	0
chr12-1411392	rs80018118	chr12_1263034_1290012:+	circERC1-1	ERC1	hsa-miR-29c-3p	ENSG00000164542	KIAA0895	0
chr12-1420263	rs117601704	chr12_1263034_1290012:+	circERC1-1	ERC1	hsa-miR-29a-3p	ENSG00000164542	KIAA0895	0
chr12-1420263	rs117601704	chr12_1263034_1290012:+	circERC1-1	ERC1	hsa-miR-29b-3p	ENSG00000164542	KIAA0895	0
chr12-1420263	rs117601704	chr12_1263034_1290012:+	circERC1-1	ERC1	hsa-miR-29c-3p	ENSG00000164542	KIAA0895	0
chr12-1328345	rs79543065	chr12_1263034_1290012:+	circERC1-1	ERC1	hsa-miR-133a-3p	ENSG00000164631	ZNF12	0
chr12-1328345	rs79543065	chr12_1263034_1290012:+	circERC1-1	ERC1	hsa-miR-133b	ENSG00000164631	ZNF12	0
chr12-1411392	rs80018118	chr12_1263034_1290012:+	circERC1-1	ERC1	hsa-miR-133a-3p	ENSG00000164631	ZNF12	0
chr12-1411392	rs80018118	chr12_1263034_1290012:+	circERC1-1	ERC1	hsa-miR-133b	ENSG00000164631	ZNF12	0
chr12-1420263	rs117601704	chr12_1263034_1290012:+	circERC1-1	ERC1	hsa-miR-133a-3p	ENSG00000164631	ZNF12	0
chr12-1420263	rs117601704	chr12_1263034_1290012:+	circERC1-1	ERC1	hsa-miR-133b	ENSG00000164631	ZNF12	0
chr12-1328345	rs79543065	chr12_1263034_1290012:+	circERC1-1	ERC1	hsa-miR-29a-3p	ENSG00000164684	ZNF704	0
chr12-1328345	rs79543065	chr12_1263034_1290012:+	circERC1-1	ERC1	hsa-miR-29b-3p	ENSG00000164684	ZNF704	0
chr12-1328345	rs79543065	chr12_1263034_1290012:+	circERC1-1	ERC1	hsa-miR-29c-3p	ENSG00000164684	ZNF704	0
chr12-1411392	rs80018118	chr12_1263034_1290012:+	circERC1-1	ERC1	hsa-miR-29a-3p	ENSG00000164684	ZNF704	0
chr12-1411392	rs80018118	chr12_1263034_1290012:+	circERC1-1	ERC1	hsa-miR-29b-3p	ENSG00000164684	ZNF704	0
chr12-1411392	rs80018118	chr12_1263034_1290012:+	circERC1-1	ERC1	hsa-miR-29c-3p	ENSG00000164684	ZNF704	0
chr12-1420263	rs117601704	chr12_1263034_1290012:+	circERC1-1	ERC1	hsa-miR-29a-3p	ENSG00000164684	ZNF704	0
chr12-1420263	rs117601704	chr12_1263034_1290012:+	circERC1-1	ERC1	hsa-miR-29b-3p	ENSG00000164684	ZNF704	0
chr12-1420263	rs117601704	chr12_1263034_1290012:+	circERC1-1	ERC1	hsa-miR-29c-3p	ENSG00000164684	ZNF704	0
chr12-1328345	rs79543065	chr12_1263034_1290012:+	circERC1-1	ERC1	hsa-miR-29a-3p	ENSG00000164764	SBSPON	0
chr12-1328345	rs79543065	chr12_1263034_1290012:+	circERC1-1	ERC1	hsa-miR-29b-3p	ENSG00000164764	SBSPON	0
chr12-1328345	rs79543065	chr12_1263034_1290012:+	circERC1-1	ERC1	hsa-miR-29c-3p	ENSG00000164764	SBSPON	0
chr12-1411392	rs80018118	chr12_1263034_1290012:+	circERC1-1	ERC1	hsa-miR-29a-3p	ENSG00000164764	SBSPON	0
chr12-1411392	rs80018118	chr12_1263034_1290012:+	circERC1-1	ERC1	hsa-miR-29b-3p	ENSG00000164764	SBSPON	0
chr12-1411392	rs80018118	chr12_1263034_1290012:+	circERC1-1	ERC1	hsa-miR-29c-3p	ENSG00000164764	SBSPON	0
chr12-1420263	rs117601704	chr12_1263034_1290012:+	circERC1-1	ERC1	hsa-miR-29a-3p	ENSG00000164764	SBSPON	0
chr12-1420263	rs117601704	chr12_1263034_1290012:+	circERC1-1	ERC1	hsa-miR-29b-3p	ENSG00000164764	SBSPON	0
chr12-1420263	rs117601704	chr12_1263034_1290012:+	circERC1-1	ERC1	hsa-miR-29c-3p	ENSG00000164764	SBSPON	0
chr12-1328345	rs79543065	chr12_1263034_1290012:+	circERC1-1	ERC1	hsa-miR-133a-3p	ENSG00000164778	EN2	0
chr12-1328345	rs79543065	chr12_1263034_1290012:+	circERC1-1	ERC1	hsa-miR-133b	ENSG00000164778	EN2	0
chr12-1411392	rs80018118	chr12_1263034_1290012:+	circERC1-1	ERC1	hsa-miR-133a-3p	ENSG00000164778	EN2	0
chr12-1411392	rs80018118	chr12_1263034_1290012:+	circERC1-1	ERC1	hsa-miR-133b	ENSG00000164778	EN2	0
chr12-1420263	rs117601704	chr12_1263034_1290012:+	circERC1-1	ERC1	hsa-miR-133a-3p	ENSG00000164778	EN2	0
chr12-1420263	rs117601704	chr12_1263034_1290012:+	circERC1-1	ERC1	hsa-miR-133b	ENSG00000164778	EN2	0
chr12-1411392	rs80018118	chr12_1263034_1290012:+	circERC1-1	ERC1	hsa-miR-133a-3p	ENSG00000164944	VIRMA	0
chr12-1411392	rs80018118	chr12_1263034_1290012:+	circERC1-1	ERC1	hsa-miR-133b	ENSG00000164944	VIRMA	0
chr12-1328345	rs79543065	chr12_1263034_1290012:+	circERC1-1	ERC1	hsa-miR-29a-3p	ENSG00000164946	FREM1	0
chr12-1328345	rs79543065	chr12_1263034_1290012:+	circERC1-1	ERC1	hsa-miR-29b-3p	ENSG00000164946	FREM1	0
chr12-1328345	rs79543065	chr12_1263034_1290012:+	circERC1-1	ERC1	hsa-miR-29c-3p	ENSG00000164946	FREM1	0
chr12-1411392	rs80018118	chr12_1263034_1290012:+	circERC1-1	ERC1	hsa-miR-29a-3p	ENSG00000164946	FREM1	0
chr12-1411392	rs80018118	chr12_1263034_1290012:+	circERC1-1	ERC1	hsa-miR-29b-3p	ENSG00000164946	FREM1	0
chr12-1411392	rs80018118	chr12_1263034_1290012:+	circERC1-1	ERC1	hsa-miR-29c-3p	ENSG00000164946	FREM1	0
chr12-1420263	rs117601704	chr12_1263034_1290012:+	circERC1-1	ERC1	hsa-miR-29a-3p	ENSG00000164946	FREM1	0
chr12-1420263	rs117601704	chr12_1263034_1290012:+	circERC1-1	ERC1	hsa-miR-29b-3p	ENSG00000164946	FREM1	0
chr12-1420263	rs117601704	chr12_1263034_1290012:+	circERC1-1	ERC1	hsa-miR-29c-3p	ENSG00000164946	FREM1	0
chr12-1328345	rs79543065	chr12_1263034_1290012:+	circERC1-1	ERC1	hsa-miR-29a-3p	ENSG00000165124	SVEP1	0
chr12-1328345	rs79543065	chr12_1263034_1290012:+	circERC1-1	ERC1	hsa-miR-29b-3p	ENSG00000165124	SVEP1	0
chr12-1328345	rs79543065	chr12_1263034_1290012:+	circERC1-1	ERC1	hsa-miR-29c-3p	ENSG00000165124	SVEP1	0
chr12-1411392	rs80018118	chr12_1263034_1290012:+	circERC1-1	ERC1	hsa-miR-29a-3p	ENSG00000165124	SVEP1	0
chr12-1411392	rs80018118	chr12_1263034_1290012:+	circERC1-1	ERC1	hsa-miR-29b-3p	ENSG00000165124	SVEP1	0
chr12-1411392	rs80018118	chr12_1263034_1290012:+	circERC1-1	ERC1	hsa-miR-29c-3p	ENSG00000165124	SVEP1	0
chr12-1420263	rs117601704	chr12_1263034_1290012:+	circERC1-1	ERC1	hsa-miR-29a-3p	ENSG00000165124	SVEP1	0
chr12-1420263	rs117601704	chr12_1263034_1290012:+	circERC1-1	ERC1	hsa-miR-29b-3p	ENSG00000165124	SVEP1	0
chr12-1420263	rs117601704	chr12_1263034_1290012:+	circERC1-1	ERC1	hsa-miR-29c-3p	ENSG00000165124	SVEP1	0
chr12-1328345	rs79543065	chr12_1263034_1290012:+	circERC1-1	ERC1	hsa-miR-29a-3p	ENSG00000165138	ANKS6	0
chr12-1328345	rs79543065	chr12_1263034_1290012:+	circERC1-1	ERC1	hsa-miR-29b-3p	ENSG00000165138	ANKS6	0
chr12-1328345	rs79543065	chr12_1263034_1290012:+	circERC1-1	ERC1	hsa-miR-29c-3p	ENSG00000165138	ANKS6	0
chr12-1411392	rs80018118	chr12_1263034_1290012:+	circERC1-1	ERC1	hsa-miR-29a-3p	ENSG00000165138	ANKS6	0
chr12-1411392	rs80018118	chr12_1263034_1290012:+	circERC1-1	ERC1	hsa-miR-29b-3p	ENSG00000165138	ANKS6	0
chr12-1411392	rs80018118	chr12_1263034_1290012:+	circERC1-1	ERC1	hsa-miR-29c-3p	ENSG00000165138	ANKS6	0
chr12-1420263	rs117601704	chr12_1263034_1290012:+	circERC1-1	ERC1	hsa-miR-29a-3p	ENSG00000165138	ANKS6	0
chr12-1420263	rs117601704	chr12_1263034_1290012:+	circERC1-1	ERC1	hsa-miR-29b-3p	ENSG00000165138	ANKS6	0
chr12-1420263	rs117601704	chr12_1263034_1290012:+	circERC1-1	ERC1	hsa-miR-29c-3p	ENSG00000165138	ANKS6	0
chr12-1328345	rs79543065	chr12_1263034_1290012:+	circERC1-1	ERC1	hsa-miR-133a-3p	ENSG00000165215	CLDN3	0
chr12-1328345	rs79543065	chr12_1263034_1290012:+	circERC1-1	ERC1	hsa-miR-133b	ENSG00000165215	CLDN3	0
chr12-1411392	rs80018118	chr12_1263034_1290012:+	circERC1-1	ERC1	hsa-miR-133a-3p	ENSG00000165215	CLDN3	0
chr12-1411392	rs80018118	chr12_1263034_1290012:+	circERC1-1	ERC1	hsa-miR-133b	ENSG00000165215	CLDN3	0
chr12-1420263	rs117601704	chr12_1263034_1290012:+	circERC1-1	ERC1	hsa-miR-133a-3p	ENSG00000165215	CLDN3	0
chr12-1420263	rs117601704	chr12_1263034_1290012:+	circERC1-1	ERC1	hsa-miR-133b	ENSG00000165215	CLDN3	0
chr12-1328345	rs79543065	chr12_1263034_1290012:+	circERC1-1	ERC1	hsa-miR-29a-3p	ENSG00000165288	BRWD3	0
chr12-1328345	rs79543065	chr12_1263034_1290012:+	circERC1-1	ERC1	hsa-miR-29b-3p	ENSG00000165288	BRWD3	0
chr12-1328345	rs79543065	chr12_1263034_1290012:+	circERC1-1	ERC1	hsa-miR-29c-3p	ENSG00000165288	BRWD3	0
chr12-1411392	rs80018118	chr12_1263034_1290012:+	circERC1-1	ERC1	hsa-miR-29a-3p	ENSG00000165288	BRWD3	0
chr12-1411392	rs80018118	chr12_1263034_1290012:+	circERC1-1	ERC1	hsa-miR-29b-3p	ENSG00000165288	BRWD3	0
chr12-1411392	rs80018118	chr12_1263034_1290012:+	circERC1-1	ERC1	hsa-miR-29c-3p	ENSG00000165288	BRWD3	0
chr12-1420263	rs117601704	chr12_1263034_1290012:+	circERC1-1	ERC1	hsa-miR-29a-3p	ENSG00000165288	BRWD3	0
chr12-1420263	rs117601704	chr12_1263034_1290012:+	circERC1-1	ERC1	hsa-miR-29b-3p	ENSG00000165288	BRWD3	0
chr12-1420263	rs117601704	chr12_1263034_1290012:+	circERC1-1	ERC1	hsa-miR-29c-3p	ENSG00000165288	BRWD3	0
chr12-1328345	rs79543065	chr12_1263034_1290012:+	circERC1-1	ERC1	hsa-miR-29a-3p	ENSG00000165406	MARCH8	0
chr12-1328345	rs79543065	chr12_1263034_1290012:+	circERC1-1	ERC1	hsa-miR-29b-3p	ENSG00000165406	MARCH8	0
chr12-1328345	rs79543065	chr12_1263034_1290012:+	circERC1-1	ERC1	hsa-miR-29c-3p	ENSG00000165406	MARCH8	0
chr12-1411392	rs80018118	chr12_1263034_1290012:+	circERC1-1	ERC1	hsa-miR-29a-3p	ENSG00000165406	MARCH8	0
chr12-1411392	rs80018118	chr12_1263034_1290012:+	circERC1-1	ERC1	hsa-miR-29b-3p	ENSG00000165406	MARCH8	0
chr12-1411392	rs80018118	chr12_1263034_1290012:+	circERC1-1	ERC1	hsa-miR-29c-3p	ENSG00000165406	MARCH8	0
chr12-1420263	rs117601704	chr12_1263034_1290012:+	circERC1-1	ERC1	hsa-miR-29a-3p	ENSG00000165406	MARCH8	0
chr12-1420263	rs117601704	chr12_1263034_1290012:+	circERC1-1	ERC1	hsa-miR-29b-3p	ENSG00000165406	MARCH8	0
chr12-1420263	rs117601704	chr12_1263034_1290012:+	circERC1-1	ERC1	hsa-miR-29c-3p	ENSG00000165406	MARCH8	0
chr12-1328345	rs79543065	chr12_1263034_1290012:+	circERC1-1	ERC1	hsa-miR-29a-3p	ENSG00000165521	EML5	0
chr12-1328345	rs79543065	chr12_1263034_1290012:+	circERC1-1	ERC1	hsa-miR-29b-3p	ENSG00000165521	EML5	0
chr12-1328345	rs79543065	chr12_1263034_1290012:+	circERC1-1	ERC1	hsa-miR-29c-3p	ENSG00000165521	EML5	0
chr12-1411392	rs80018118	chr12_1263034_1290012:+	circERC1-1	ERC1	hsa-miR-29a-3p	ENSG00000165521	EML5	0
chr12-1411392	rs80018118	chr12_1263034_1290012:+	circERC1-1	ERC1	hsa-miR-29b-3p	ENSG00000165521	EML5	0
chr12-1411392	rs80018118	chr12_1263034_1290012:+	circERC1-1	ERC1	hsa-miR-29c-3p	ENSG00000165521	EML5	0
chr12-1420263	rs117601704	chr12_1263034_1290012:+	circERC1-1	ERC1	hsa-miR-29a-3p	ENSG00000165521	EML5	0
chr12-1420263	rs117601704	chr12_1263034_1290012:+	circERC1-1	ERC1	hsa-miR-29b-3p	ENSG00000165521	EML5	0
chr12-1420263	rs117601704	chr12_1263034_1290012:+	circERC1-1	ERC1	hsa-miR-29c-3p	ENSG00000165521	EML5	0
chr12-1328345	rs79543065	chr12_1263034_1290012:+	circERC1-1	ERC1	hsa-miR-29a-3p	ENSG00000166145	SPINT1	0
chr12-1328345	rs79543065	chr12_1263034_1290012:+	circERC1-1	ERC1	hsa-miR-29b-3p	ENSG00000166145	SPINT1	0
chr12-1328345	rs79543065	chr12_1263034_1290012:+	circERC1-1	ERC1	hsa-miR-29c-3p	ENSG00000166145	SPINT1	0
chr12-1411392	rs80018118	chr12_1263034_1290012:+	circERC1-1	ERC1	hsa-miR-29a-3p	ENSG00000166145	SPINT1	0
chr12-1411392	rs80018118	chr12_1263034_1290012:+	circERC1-1	ERC1	hsa-miR-29b-3p	ENSG00000166145	SPINT1	0
chr12-1411392	rs80018118	chr12_1263034_1290012:+	circERC1-1	ERC1	hsa-miR-29c-3p	ENSG00000166145	SPINT1	0
chr12-1420263	rs117601704	chr12_1263034_1290012:+	circERC1-1	ERC1	hsa-miR-29a-3p	ENSG00000166145	SPINT1	0
chr12-1420263	rs117601704	chr12_1263034_1290012:+	circERC1-1	ERC1	hsa-miR-29b-3p	ENSG00000166145	SPINT1	0
chr12-1420263	rs117601704	chr12_1263034_1290012:+	circERC1-1	ERC1	hsa-miR-29c-3p	ENSG00000166145	SPINT1	0
chr12-1328345	rs79543065	chr12_1263034_1290012:+	circERC1-1	ERC1	hsa-miR-133a-3p	ENSG00000166347	CYB5A	0
chr12-1328345	rs79543065	chr12_1263034_1290012:+	circERC1-1	ERC1	hsa-miR-133b	ENSG00000166347	CYB5A	0
chr12-1411392	rs80018118	chr12_1263034_1290012:+	circERC1-1	ERC1	hsa-miR-133a-3p	ENSG00000166347	CYB5A	0
chr12-1411392	rs80018118	chr12_1263034_1290012:+	circERC1-1	ERC1	hsa-miR-133b	ENSG00000166347	CYB5A	0
chr12-1420263	rs117601704	chr12_1263034_1290012:+	circERC1-1	ERC1	hsa-miR-133a-3p	ENSG00000166347	CYB5A	0
chr12-1420263	rs117601704	chr12_1263034_1290012:+	circERC1-1	ERC1	hsa-miR-133b	ENSG00000166347	CYB5A	0
chr12-1328345	rs79543065	chr12_1263034_1290012:+	circERC1-1	ERC1	hsa-miR-133a-3p	ENSG00000166446	CDYL2	0
chr12-1328345	rs79543065	chr12_1263034_1290012:+	circERC1-1	ERC1	hsa-miR-133b	ENSG00000166446	CDYL2	0
chr12-1411392	rs80018118	chr12_1263034_1290012:+	circERC1-1	ERC1	hsa-miR-133a-3p	ENSG00000166446	CDYL2	0
chr12-1411392	rs80018118	chr12_1263034_1290012:+	circERC1-1	ERC1	hsa-miR-133b	ENSG00000166446	CDYL2	0
chr12-1420263	rs117601704	chr12_1263034_1290012:+	circERC1-1	ERC1	hsa-miR-133a-3p	ENSG00000166446	CDYL2	0
chr12-1420263	rs117601704	chr12_1263034_1290012:+	circERC1-1	ERC1	hsa-miR-133b	ENSG00000166446	CDYL2	0
chr12-1328345	rs79543065	chr12_1263034_1290012:+	circERC1-1	ERC1	hsa-miR-29a-3p	ENSG00000167536	DHRS13	0
chr12-1328345	rs79543065	chr12_1263034_1290012:+	circERC1-1	ERC1	hsa-miR-29b-3p	ENSG00000167536	DHRS13	0
chr12-1328345	rs79543065	chr12_1263034_1290012:+	circERC1-1	ERC1	hsa-miR-29c-3p	ENSG00000167536	DHRS13	0
chr12-1411392	rs80018118	chr12_1263034_1290012:+	circERC1-1	ERC1	hsa-miR-29a-3p	ENSG00000167536	DHRS13	0
chr12-1411392	rs80018118	chr12_1263034_1290012:+	circERC1-1	ERC1	hsa-miR-29b-3p	ENSG00000167536	DHRS13	0
chr12-1411392	rs80018118	chr12_1263034_1290012:+	circERC1-1	ERC1	hsa-miR-29c-3p	ENSG00000167536	DHRS13	0
chr12-1420263	rs117601704	chr12_1263034_1290012:+	circERC1-1	ERC1	hsa-miR-29a-3p	ENSG00000167536	DHRS13	0
chr12-1420263	rs117601704	chr12_1263034_1290012:+	circERC1-1	ERC1	hsa-miR-29b-3p	ENSG00000167536	DHRS13	0
chr12-1420263	rs117601704	chr12_1263034_1290012:+	circERC1-1	ERC1	hsa-miR-29c-3p	ENSG00000167536	DHRS13	0
chr12-1328345	rs79543065	chr12_1263034_1290012:+	circERC1-1	ERC1	hsa-miR-133a-3p	ENSG00000168246	UBTD2	0
chr12-1328345	rs79543065	chr12_1263034_1290012:+	circERC1-1	ERC1	hsa-miR-133b	ENSG00000168246	UBTD2	0
chr12-1328345	rs79543065	chr12_1263034_1290012:+	circERC1-1	ERC1	hsa-miR-29a-3p	ENSG00000168246	UBTD2	0
chr12-1328345	rs79543065	chr12_1263034_1290012:+	circERC1-1	ERC1	hsa-miR-29b-3p	ENSG00000168246	UBTD2	0
chr12-1328345	rs79543065	chr12_1263034_1290012:+	circERC1-1	ERC1	hsa-miR-29c-3p	ENSG00000168246	UBTD2	0
chr12-1411392	rs80018118	chr12_1263034_1290012:+	circERC1-1	ERC1	hsa-miR-133a-3p	ENSG00000168246	UBTD2	0
chr12-1411392	rs80018118	chr12_1263034_1290012:+	circERC1-1	ERC1	hsa-miR-133b	ENSG00000168246	UBTD2	0
chr12-1411392	rs80018118	chr12_1263034_1290012:+	circERC1-1	ERC1	hsa-miR-29a-3p	ENSG00000168246	UBTD2	0
chr12-1411392	rs80018118	chr12_1263034_1290012:+	circERC1-1	ERC1	hsa-miR-29b-3p	ENSG00000168246	UBTD2	0
chr12-1411392	rs80018118	chr12_1263034_1290012:+	circERC1-1	ERC1	hsa-miR-29c-3p	ENSG00000168246	UBTD2	0
chr12-1420263	rs117601704	chr12_1263034_1290012:+	circERC1-1	ERC1	hsa-miR-133a-3p	ENSG00000168246	UBTD2	0
chr12-1420263	rs117601704	chr12_1263034_1290012:+	circERC1-1	ERC1	hsa-miR-133b	ENSG00000168246	UBTD2	0
chr12-1420263	rs117601704	chr12_1263034_1290012:+	circERC1-1	ERC1	hsa-miR-29a-3p	ENSG00000168246	UBTD2	0
chr12-1420263	rs117601704	chr12_1263034_1290012:+	circERC1-1	ERC1	hsa-miR-29b-3p	ENSG00000168246	UBTD2	0
chr12-1420263	rs117601704	chr12_1263034_1290012:+	circERC1-1	ERC1	hsa-miR-29c-3p	ENSG00000168246	UBTD2	0
chr12-1328345	rs79543065	chr12_1263034_1290012:+	circERC1-1	ERC1	hsa-miR-29a-3p	ENSG00000168827	GFM1	1
chr12-1328345	rs79543065	chr12_1263034_1290012:+	circERC1-1	ERC1	hsa-miR-29b-3p	ENSG00000168827	GFM1	1
chr12-1328345	rs79543065	chr12_1263034_1290012:+	circERC1-1	ERC1	hsa-miR-29c-3p	ENSG00000168827	GFM1	1
chr12-1411392	rs80018118	chr12_1263034_1290012:+	circERC1-1	ERC1	hsa-miR-29a-3p	ENSG00000168827	GFM1	1
chr12-1411392	rs80018118	chr12_1263034_1290012:+	circERC1-1	ERC1	hsa-miR-29b-3p	ENSG00000168827	GFM1	1
chr12-1411392	rs80018118	chr12_1263034_1290012:+	circERC1-1	ERC1	hsa-miR-29c-3p	ENSG00000168827	GFM1	1
chr12-1420263	rs117601704	chr12_1263034_1290012:+	circERC1-1	ERC1	hsa-miR-29a-3p	ENSG00000168827	GFM1	1
chr12-1420263	rs117601704	chr12_1263034_1290012:+	circERC1-1	ERC1	hsa-miR-29b-3p	ENSG00000168827	GFM1	1
chr12-1420263	rs117601704	chr12_1263034_1290012:+	circERC1-1	ERC1	hsa-miR-29c-3p	ENSG00000168827	GFM1	1
chr12-1328345	rs79543065	chr12_1263034_1290012:+	circERC1-1	ERC1	hsa-miR-133a-3p	ENSG00000168944	CEP120	0
chr12-1328345	rs79543065	chr12_1263034_1290012:+	circERC1-1	ERC1	hsa-miR-133b	ENSG00000168944	CEP120	0
chr12-1411392	rs80018118	chr12_1263034_1290012:+	circERC1-1	ERC1	hsa-miR-133a-3p	ENSG00000168944	CEP120	0
chr12-1411392	rs80018118	chr12_1263034_1290012:+	circERC1-1	ERC1	hsa-miR-133b	ENSG00000168944	CEP120	0
chr12-1420263	rs117601704	chr12_1263034_1290012:+	circERC1-1	ERC1	hsa-miR-133a-3p	ENSG00000168944	CEP120	0
chr12-1420263	rs117601704	chr12_1263034_1290012:+	circERC1-1	ERC1	hsa-miR-133b	ENSG00000168944	CEP120	0
chr12-1328345	rs79543065	chr12_1263034_1290012:+	circERC1-1	ERC1	hsa-miR-29a-3p	ENSG00000169174	PCSK9	0
chr12-1328345	rs79543065	chr12_1263034_1290012:+	circERC1-1	ERC1	hsa-miR-29b-3p	ENSG00000169174	PCSK9	0
chr12-1328345	rs79543065	chr12_1263034_1290012:+	circERC1-1	ERC1	hsa-miR-29c-3p	ENSG00000169174	PCSK9	0
chr12-1411392	rs80018118	chr12_1263034_1290012:+	circERC1-1	ERC1	hsa-miR-29a-3p	ENSG00000169174	PCSK9	0
chr12-1411392	rs80018118	chr12_1263034_1290012:+	circERC1-1	ERC1	hsa-miR-29b-3p	ENSG00000169174	PCSK9	0
chr12-1411392	rs80018118	chr12_1263034_1290012:+	circERC1-1	ERC1	hsa-miR-29c-3p	ENSG00000169174	PCSK9	0
chr12-1420263	rs117601704	chr12_1263034_1290012:+	circERC1-1	ERC1	hsa-miR-29a-3p	ENSG00000169174	PCSK9	0
chr12-1420263	rs117601704	chr12_1263034_1290012:+	circERC1-1	ERC1	hsa-miR-29b-3p	ENSG00000169174	PCSK9	0
chr12-1420263	rs117601704	chr12_1263034_1290012:+	circERC1-1	ERC1	hsa-miR-29c-3p	ENSG00000169174	PCSK9	0
chr12-1328345	rs79543065	chr12_1263034_1290012:+	circERC1-1	ERC1	hsa-miR-29a-3p	ENSG00000170743	SYT9	0
chr12-1328345	rs79543065	chr12_1263034_1290012:+	circERC1-1	ERC1	hsa-miR-29b-3p	ENSG00000170743	SYT9	0
chr12-1328345	rs79543065	chr12_1263034_1290012:+	circERC1-1	ERC1	hsa-miR-29c-3p	ENSG00000170743	SYT9	0
chr12-1411392	rs80018118	chr12_1263034_1290012:+	circERC1-1	ERC1	hsa-miR-29a-3p	ENSG00000170743	SYT9	0
chr12-1411392	rs80018118	chr12_1263034_1290012:+	circERC1-1	ERC1	hsa-miR-29b-3p	ENSG00000170743	SYT9	0
chr12-1411392	rs80018118	chr12_1263034_1290012:+	circERC1-1	ERC1	hsa-miR-29c-3p	ENSG00000170743	SYT9	0
chr12-1420263	rs117601704	chr12_1263034_1290012:+	circERC1-1	ERC1	hsa-miR-29a-3p	ENSG00000170743	SYT9	0
chr12-1420263	rs117601704	chr12_1263034_1290012:+	circERC1-1	ERC1	hsa-miR-29b-3p	ENSG00000170743	SYT9	0
chr12-1420263	rs117601704	chr12_1263034_1290012:+	circERC1-1	ERC1	hsa-miR-29c-3p	ENSG00000170743	SYT9	0
chr12-1328345	rs79543065	chr12_1263034_1290012:+	circERC1-1	ERC1	hsa-miR-29a-3p	ENSG00000170779	CDCA4	0
chr12-1328345	rs79543065	chr12_1263034_1290012:+	circERC1-1	ERC1	hsa-miR-29b-3p	ENSG00000170779	CDCA4	0
chr12-1328345	rs79543065	chr12_1263034_1290012:+	circERC1-1	ERC1	hsa-miR-29c-3p	ENSG00000170779	CDCA4	0
chr12-1411392	rs80018118	chr12_1263034_1290012:+	circERC1-1	ERC1	hsa-miR-29a-3p	ENSG00000170779	CDCA4	0
chr12-1411392	rs80018118	chr12_1263034_1290012:+	circERC1-1	ERC1	hsa-miR-29b-3p	ENSG00000170779	CDCA4	0
chr12-1411392	rs80018118	chr12_1263034_1290012:+	circERC1-1	ERC1	hsa-miR-29c-3p	ENSG00000170779	CDCA4	0
chr12-1420263	rs117601704	chr12_1263034_1290012:+	circERC1-1	ERC1	hsa-miR-29a-3p	ENSG00000170779	CDCA4	0
chr12-1420263	rs117601704	chr12_1263034_1290012:+	circERC1-1	ERC1	hsa-miR-29b-3p	ENSG00000170779	CDCA4	0
chr12-1420263	rs117601704	chr12_1263034_1290012:+	circERC1-1	ERC1	hsa-miR-29c-3p	ENSG00000170779	CDCA4	0
chr12-1328345	rs79543065	chr12_1263034_1290012:+	circERC1-1	ERC1	hsa-miR-133a-3p	ENSG00000170836	PPM1D	0
chr12-1328345	rs79543065	chr12_1263034_1290012:+	circERC1-1	ERC1	hsa-miR-133b	ENSG00000170836	PPM1D	0
chr12-1328345	rs79543065	chr12_1263034_1290012:+	circERC1-1	ERC1	hsa-miR-29a-3p	ENSG00000170836	PPM1D	0
chr12-1328345	rs79543065	chr12_1263034_1290012:+	circERC1-1	ERC1	hsa-miR-29b-3p	ENSG00000170836	PPM1D	0
chr12-1328345	rs79543065	chr12_1263034_1290012:+	circERC1-1	ERC1	hsa-miR-29c-3p	ENSG00000170836	PPM1D	0
chr12-1411392	rs80018118	chr12_1263034_1290012:+	circERC1-1	ERC1	hsa-miR-133a-3p	ENSG00000170836	PPM1D	0
chr12-1411392	rs80018118	chr12_1263034_1290012:+	circERC1-1	ERC1	hsa-miR-133b	ENSG00000170836	PPM1D	0
chr12-1411392	rs80018118	chr12_1263034_1290012:+	circERC1-1	ERC1	hsa-miR-29a-3p	ENSG00000170836	PPM1D	0
chr12-1411392	rs80018118	chr12_1263034_1290012:+	circERC1-1	ERC1	hsa-miR-29b-3p	ENSG00000170836	PPM1D	0
chr12-1411392	rs80018118	chr12_1263034_1290012:+	circERC1-1	ERC1	hsa-miR-29c-3p	ENSG00000170836	PPM1D	0
chr12-1420263	rs117601704	chr12_1263034_1290012:+	circERC1-1	ERC1	hsa-miR-133a-3p	ENSG00000170836	PPM1D	0
chr12-1420263	rs117601704	chr12_1263034_1290012:+	circERC1-1	ERC1	hsa-miR-133b	ENSG00000170836	PPM1D	0
chr12-1420263	rs117601704	chr12_1263034_1290012:+	circERC1-1	ERC1	hsa-miR-29a-3p	ENSG00000170836	PPM1D	0
chr12-1420263	rs117601704	chr12_1263034_1290012:+	circERC1-1	ERC1	hsa-miR-29b-3p	ENSG00000170836	PPM1D	0
chr12-1420263	rs117601704	chr12_1263034_1290012:+	circERC1-1	ERC1	hsa-miR-29c-3p	ENSG00000170836	PPM1D	0
chr12-1328345	rs79543065	chr12_1263034_1290012:+	circERC1-1	ERC1	hsa-miR-29a-3p	ENSG00000171365	CLCN5	1
chr12-1328345	rs79543065	chr12_1263034_1290012:+	circERC1-1	ERC1	hsa-miR-29b-3p	ENSG00000171365	CLCN5	1
chr12-1328345	rs79543065	chr12_1263034_1290012:+	circERC1-1	ERC1	hsa-miR-29c-3p	ENSG00000171365	CLCN5	1
chr12-1411392	rs80018118	chr12_1263034_1290012:+	circERC1-1	ERC1	hsa-miR-29a-3p	ENSG00000171365	CLCN5	1
chr12-1411392	rs80018118	chr12_1263034_1290012:+	circERC1-1	ERC1	hsa-miR-29b-3p	ENSG00000171365	CLCN5	1
chr12-1411392	rs80018118	chr12_1263034_1290012:+	circERC1-1	ERC1	hsa-miR-29c-3p	ENSG00000171365	CLCN5	1
chr12-1420263	rs117601704	chr12_1263034_1290012:+	circERC1-1	ERC1	hsa-miR-29a-3p	ENSG00000171365	CLCN5	1
chr12-1420263	rs117601704	chr12_1263034_1290012:+	circERC1-1	ERC1	hsa-miR-29b-3p	ENSG00000171365	CLCN5	1
chr12-1420263	rs117601704	chr12_1263034_1290012:+	circERC1-1	ERC1	hsa-miR-29c-3p	ENSG00000171365	CLCN5	1
chr12-1328345	rs79543065	chr12_1263034_1290012:+	circERC1-1	ERC1	hsa-miR-133a-3p	ENSG00000171466	ZNF562	0
chr12-1328345	rs79543065	chr12_1263034_1290012:+	circERC1-1	ERC1	hsa-miR-133b	ENSG00000171466	ZNF562	0
chr12-1411392	rs80018118	chr12_1263034_1290012:+	circERC1-1	ERC1	hsa-miR-133a-3p	ENSG00000171466	ZNF562	0
chr12-1411392	rs80018118	chr12_1263034_1290012:+	circERC1-1	ERC1	hsa-miR-133b	ENSG00000171466	ZNF562	0
chr12-1420263	rs117601704	chr12_1263034_1290012:+	circERC1-1	ERC1	hsa-miR-133a-3p	ENSG00000171466	ZNF562	0
chr12-1420263	rs117601704	chr12_1263034_1290012:+	circERC1-1	ERC1	hsa-miR-133b	ENSG00000171466	ZNF562	0
chr12-1328345	rs79543065	chr12_1263034_1290012:+	circERC1-1	ERC1	hsa-miR-29a-3p	ENSG00000171729	TMEM51	0
chr12-1328345	rs79543065	chr12_1263034_1290012:+	circERC1-1	ERC1	hsa-miR-29b-3p	ENSG00000171729	TMEM51	0
chr12-1328345	rs79543065	chr12_1263034_1290012:+	circERC1-1	ERC1	hsa-miR-29c-3p	ENSG00000171729	TMEM51	0
chr12-1411392	rs80018118	chr12_1263034_1290012:+	circERC1-1	ERC1	hsa-miR-29a-3p	ENSG00000171729	TMEM51	0
chr12-1411392	rs80018118	chr12_1263034_1290012:+	circERC1-1	ERC1	hsa-miR-29b-3p	ENSG00000171729	TMEM51	0
chr12-1411392	rs80018118	chr12_1263034_1290012:+	circERC1-1	ERC1	hsa-miR-29c-3p	ENSG00000171729	TMEM51	0
chr12-1420263	rs117601704	chr12_1263034_1290012:+	circERC1-1	ERC1	hsa-miR-29a-3p	ENSG00000171729	TMEM51	0
chr12-1420263	rs117601704	chr12_1263034_1290012:+	circERC1-1	ERC1	hsa-miR-29b-3p	ENSG00000171729	TMEM51	0
chr12-1420263	rs117601704	chr12_1263034_1290012:+	circERC1-1	ERC1	hsa-miR-29c-3p	ENSG00000171729	TMEM51	0
chr12-1328345	rs79543065	chr12_1263034_1290012:+	circERC1-1	ERC1	hsa-miR-133a-3p	ENSG00000171862	PTEN	0
chr12-1328345	rs79543065	chr12_1263034_1290012:+	circERC1-1	ERC1	hsa-miR-133b	ENSG00000171862	PTEN	0
chr12-1328345	rs79543065	chr12_1263034_1290012:+	circERC1-1	ERC1	hsa-miR-29a-3p	ENSG00000171862	PTEN	0
chr12-1328345	rs79543065	chr12_1263034_1290012:+	circERC1-1	ERC1	hsa-miR-29b-3p	ENSG00000171862	PTEN	0
chr12-1328345	rs79543065	chr12_1263034_1290012:+	circERC1-1	ERC1	hsa-miR-29c-3p	ENSG00000171862	PTEN	0
chr12-1411392	rs80018118	chr12_1263034_1290012:+	circERC1-1	ERC1	hsa-miR-133a-3p	ENSG00000171862	PTEN	0
chr12-1411392	rs80018118	chr12_1263034_1290012:+	circERC1-1	ERC1	hsa-miR-133b	ENSG00000171862	PTEN	0
chr12-1411392	rs80018118	chr12_1263034_1290012:+	circERC1-1	ERC1	hsa-miR-29a-3p	ENSG00000171862	PTEN	0
chr12-1411392	rs80018118	chr12_1263034_1290012:+	circERC1-1	ERC1	hsa-miR-29b-3p	ENSG00000171862	PTEN	0
chr12-1411392	rs80018118	chr12_1263034_1290012:+	circERC1-1	ERC1	hsa-miR-29c-3p	ENSG00000171862	PTEN	0
chr12-1420263	rs117601704	chr12_1263034_1290012:+	circERC1-1	ERC1	hsa-miR-133a-3p	ENSG00000171862	PTEN	0
chr12-1420263	rs117601704	chr12_1263034_1290012:+	circERC1-1	ERC1	hsa-miR-133b	ENSG00000171862	PTEN	0
chr12-1420263	rs117601704	chr12_1263034_1290012:+	circERC1-1	ERC1	hsa-miR-29a-3p	ENSG00000171862	PTEN	0
chr12-1420263	rs117601704	chr12_1263034_1290012:+	circERC1-1	ERC1	hsa-miR-29b-3p	ENSG00000171862	PTEN	0
chr12-1420263	rs117601704	chr12_1263034_1290012:+	circERC1-1	ERC1	hsa-miR-29c-3p	ENSG00000171862	PTEN	0
chr12-1328345	rs79543065	chr12_1263034_1290012:+	circERC1-1	ERC1	hsa-miR-133a-3p	ENSG00000171988	JMJD1C	0
chr12-1328345	rs79543065	chr12_1263034_1290012:+	circERC1-1	ERC1	hsa-miR-133b	ENSG00000171988	JMJD1C	0
chr12-1328345	rs79543065	chr12_1263034_1290012:+	circERC1-1	ERC1	hsa-miR-29a-3p	ENSG00000171988	JMJD1C	0
chr12-1328345	rs79543065	chr12_1263034_1290012:+	circERC1-1	ERC1	hsa-miR-29b-3p	ENSG00000171988	JMJD1C	0
chr12-1328345	rs79543065	chr12_1263034_1290012:+	circERC1-1	ERC1	hsa-miR-29c-3p	ENSG00000171988	JMJD1C	0
chr12-1411392	rs80018118	chr12_1263034_1290012:+	circERC1-1	ERC1	hsa-miR-133a-3p	ENSG00000171988	JMJD1C	0
chr12-1411392	rs80018118	chr12_1263034_1290012:+	circERC1-1	ERC1	hsa-miR-133b	ENSG00000171988	JMJD1C	0
chr12-1411392	rs80018118	chr12_1263034_1290012:+	circERC1-1	ERC1	hsa-miR-29a-3p	ENSG00000171988	JMJD1C	0
chr12-1411392	rs80018118	chr12_1263034_1290012:+	circERC1-1	ERC1	hsa-miR-29b-3p	ENSG00000171988	JMJD1C	0
chr12-1411392	rs80018118	chr12_1263034_1290012:+	circERC1-1	ERC1	hsa-miR-29c-3p	ENSG00000171988	JMJD1C	0
chr12-1420263	rs117601704	chr12_1263034_1290012:+	circERC1-1	ERC1	hsa-miR-133a-3p	ENSG00000171988	JMJD1C	0
chr12-1420263	rs117601704	chr12_1263034_1290012:+	circERC1-1	ERC1	hsa-miR-133b	ENSG00000171988	JMJD1C	0
chr12-1420263	rs117601704	chr12_1263034_1290012:+	circERC1-1	ERC1	hsa-miR-29a-3p	ENSG00000171988	JMJD1C	0
chr12-1420263	rs117601704	chr12_1263034_1290012:+	circERC1-1	ERC1	hsa-miR-29b-3p	ENSG00000171988	JMJD1C	0
chr12-1420263	rs117601704	chr12_1263034_1290012:+	circERC1-1	ERC1	hsa-miR-29c-3p	ENSG00000171988	JMJD1C	0
chr12-1328345	rs79543065	chr12_1263034_1290012:+	circERC1-1	ERC1	hsa-miR-29a-3p	ENSG00000172007	RAB33B	0
chr12-1328345	rs79543065	chr12_1263034_1290012:+	circERC1-1	ERC1	hsa-miR-29b-3p	ENSG00000172007	RAB33B	0
chr12-1328345	rs79543065	chr12_1263034_1290012:+	circERC1-1	ERC1	hsa-miR-29c-3p	ENSG00000172007	RAB33B	0
chr12-1411392	rs80018118	chr12_1263034_1290012:+	circERC1-1	ERC1	hsa-miR-29a-3p	ENSG00000172007	RAB33B	0
chr12-1411392	rs80018118	chr12_1263034_1290012:+	circERC1-1	ERC1	hsa-miR-29b-3p	ENSG00000172007	RAB33B	0
chr12-1411392	rs80018118	chr12_1263034_1290012:+	circERC1-1	ERC1	hsa-miR-29c-3p	ENSG00000172007	RAB33B	0
chr12-1420263	rs117601704	chr12_1263034_1290012:+	circERC1-1	ERC1	hsa-miR-29a-3p	ENSG00000172007	RAB33B	0
chr12-1420263	rs117601704	chr12_1263034_1290012:+	circERC1-1	ERC1	hsa-miR-29b-3p	ENSG00000172007	RAB33B	0
chr12-1420263	rs117601704	chr12_1263034_1290012:+	circERC1-1	ERC1	hsa-miR-29c-3p	ENSG00000172007	RAB33B	0
chr12-1328345	rs79543065	chr12_1263034_1290012:+	circERC1-1	ERC1	hsa-miR-29a-3p	ENSG00000172572	PDE3A	0
chr12-1328345	rs79543065	chr12_1263034_1290012:+	circERC1-1	ERC1	hsa-miR-29b-3p	ENSG00000172572	PDE3A	0
chr12-1328345	rs79543065	chr12_1263034_1290012:+	circERC1-1	ERC1	hsa-miR-29c-3p	ENSG00000172572	PDE3A	0
chr12-1411392	rs80018118	chr12_1263034_1290012:+	circERC1-1	ERC1	hsa-miR-29a-3p	ENSG00000172572	PDE3A	0
chr12-1411392	rs80018118	chr12_1263034_1290012:+	circERC1-1	ERC1	hsa-miR-29b-3p	ENSG00000172572	PDE3A	0
chr12-1411392	rs80018118	chr12_1263034_1290012:+	circERC1-1	ERC1	hsa-miR-29c-3p	ENSG00000172572	PDE3A	0
chr12-1420263	rs117601704	chr12_1263034_1290012:+	circERC1-1	ERC1	hsa-miR-29a-3p	ENSG00000172572	PDE3A	0
chr12-1420263	rs117601704	chr12_1263034_1290012:+	circERC1-1	ERC1	hsa-miR-29b-3p	ENSG00000172572	PDE3A	0
chr12-1420263	rs117601704	chr12_1263034_1290012:+	circERC1-1	ERC1	hsa-miR-29c-3p	ENSG00000172572	PDE3A	0
chr12-1328345	rs79543065	chr12_1263034_1290012:+	circERC1-1	ERC1	hsa-miR-133a-3p	ENSG00000173914	RBM4B	0
chr12-1328345	rs79543065	chr12_1263034_1290012:+	circERC1-1	ERC1	hsa-miR-133b	ENSG00000173914	RBM4B	0
chr12-1411392	rs80018118	chr12_1263034_1290012:+	circERC1-1	ERC1	hsa-miR-133a-3p	ENSG00000173914	RBM4B	0
chr12-1411392	rs80018118	chr12_1263034_1290012:+	circERC1-1	ERC1	hsa-miR-133b	ENSG00000173914	RBM4B	0
chr12-1420263	rs117601704	chr12_1263034_1290012:+	circERC1-1	ERC1	hsa-miR-133a-3p	ENSG00000173914	RBM4B	0
chr12-1420263	rs117601704	chr12_1263034_1290012:+	circERC1-1	ERC1	hsa-miR-133b	ENSG00000173914	RBM4B	0
chr12-1328345	rs79543065	chr12_1263034_1290012:+	circERC1-1	ERC1	hsa-miR-133a-3p	ENSG00000174197	MGA	0
chr12-1328345	rs79543065	chr12_1263034_1290012:+	circERC1-1	ERC1	hsa-miR-133b	ENSG00000174197	MGA	0
chr12-1328345	rs79543065	chr12_1263034_1290012:+	circERC1-1	ERC1	hsa-miR-29a-3p	ENSG00000174197	MGA	0
chr12-1328345	rs79543065	chr12_1263034_1290012:+	circERC1-1	ERC1	hsa-miR-29b-3p	ENSG00000174197	MGA	0
chr12-1328345	rs79543065	chr12_1263034_1290012:+	circERC1-1	ERC1	hsa-miR-29c-3p	ENSG00000174197	MGA	0
chr12-1411392	rs80018118	chr12_1263034_1290012:+	circERC1-1	ERC1	hsa-miR-133a-3p	ENSG00000174197	MGA	0
chr12-1411392	rs80018118	chr12_1263034_1290012:+	circERC1-1	ERC1	hsa-miR-133b	ENSG00000174197	MGA	0
chr12-1411392	rs80018118	chr12_1263034_1290012:+	circERC1-1	ERC1	hsa-miR-29a-3p	ENSG00000174197	MGA	0
chr12-1411392	rs80018118	chr12_1263034_1290012:+	circERC1-1	ERC1	hsa-miR-29b-3p	ENSG00000174197	MGA	0
chr12-1411392	rs80018118	chr12_1263034_1290012:+	circERC1-1	ERC1	hsa-miR-29c-3p	ENSG00000174197	MGA	0
chr12-1420263	rs117601704	chr12_1263034_1290012:+	circERC1-1	ERC1	hsa-miR-133a-3p	ENSG00000174197	MGA	0
chr12-1420263	rs117601704	chr12_1263034_1290012:+	circERC1-1	ERC1	hsa-miR-133b	ENSG00000174197	MGA	0
chr12-1420263	rs117601704	chr12_1263034_1290012:+	circERC1-1	ERC1	hsa-miR-29a-3p	ENSG00000174197	MGA	0
chr12-1420263	rs117601704	chr12_1263034_1290012:+	circERC1-1	ERC1	hsa-miR-29b-3p	ENSG00000174197	MGA	0
chr12-1420263	rs117601704	chr12_1263034_1290012:+	circERC1-1	ERC1	hsa-miR-29c-3p	ENSG00000174197	MGA	0
chr12-1328345	rs79543065	chr12_1263034_1290012:+	circERC1-1	ERC1	hsa-miR-29a-3p	ENSG00000174669	SLC29A2	0
chr12-1328345	rs79543065	chr12_1263034_1290012:+	circERC1-1	ERC1	hsa-miR-29b-3p	ENSG00000174669	SLC29A2	0
chr12-1328345	rs79543065	chr12_1263034_1290012:+	circERC1-1	ERC1	hsa-miR-29c-3p	ENSG00000174669	SLC29A2	0
chr12-1411392	rs80018118	chr12_1263034_1290012:+	circERC1-1	ERC1	hsa-miR-29a-3p	ENSG00000174669	SLC29A2	0
chr12-1411392	rs80018118	chr12_1263034_1290012:+	circERC1-1	ERC1	hsa-miR-29b-3p	ENSG00000174669	SLC29A2	0
chr12-1411392	rs80018118	chr12_1263034_1290012:+	circERC1-1	ERC1	hsa-miR-29c-3p	ENSG00000174669	SLC29A2	0
chr12-1420263	rs117601704	chr12_1263034_1290012:+	circERC1-1	ERC1	hsa-miR-29a-3p	ENSG00000174669	SLC29A2	0
chr12-1420263	rs117601704	chr12_1263034_1290012:+	circERC1-1	ERC1	hsa-miR-29b-3p	ENSG00000174669	SLC29A2	0
chr12-1420263	rs117601704	chr12_1263034_1290012:+	circERC1-1	ERC1	hsa-miR-29c-3p	ENSG00000174669	SLC29A2	0
chr12-1328345	rs79543065	chr12_1263034_1290012:+	circERC1-1	ERC1	hsa-miR-133a-3p	ENSG00000175029	CTBP2	0
chr12-1328345	rs79543065	chr12_1263034_1290012:+	circERC1-1	ERC1	hsa-miR-133b	ENSG00000175029	CTBP2	0
chr12-1411392	rs80018118	chr12_1263034_1290012:+	circERC1-1	ERC1	hsa-miR-133a-3p	ENSG00000175029	CTBP2	0
chr12-1411392	rs80018118	chr12_1263034_1290012:+	circERC1-1	ERC1	hsa-miR-133b	ENSG00000175029	CTBP2	0
chr12-1420263	rs117601704	chr12_1263034_1290012:+	circERC1-1	ERC1	hsa-miR-133a-3p	ENSG00000175029	CTBP2	0
chr12-1420263	rs117601704	chr12_1263034_1290012:+	circERC1-1	ERC1	hsa-miR-133b	ENSG00000175029	CTBP2	0
chr12-1328345	rs79543065	chr12_1263034_1290012:+	circERC1-1	ERC1	hsa-miR-133a-3p	ENSG00000175556	LONRF3	0
chr12-1328345	rs79543065	chr12_1263034_1290012:+	circERC1-1	ERC1	hsa-miR-133b	ENSG00000175556	LONRF3	0
chr12-1411392	rs80018118	chr12_1263034_1290012:+	circERC1-1	ERC1	hsa-miR-133a-3p	ENSG00000175556	LONRF3	0
chr12-1411392	rs80018118	chr12_1263034_1290012:+	circERC1-1	ERC1	hsa-miR-133b	ENSG00000175556	LONRF3	0
chr12-1420263	rs117601704	chr12_1263034_1290012:+	circERC1-1	ERC1	hsa-miR-133a-3p	ENSG00000175556	LONRF3	0
chr12-1420263	rs117601704	chr12_1263034_1290012:+	circERC1-1	ERC1	hsa-miR-133b	ENSG00000175556	LONRF3	0
chr12-1328345	rs79543065	chr12_1263034_1290012:+	circERC1-1	ERC1	hsa-miR-133a-3p	ENSG00000176165	FOXG1	0
chr12-1328345	rs79543065	chr12_1263034_1290012:+	circERC1-1	ERC1	hsa-miR-133b	ENSG00000176165	FOXG1	0
chr12-1411392	rs80018118	chr12_1263034_1290012:+	circERC1-1	ERC1	hsa-miR-133a-3p	ENSG00000176165	FOXG1	0
chr12-1411392	rs80018118	chr12_1263034_1290012:+	circERC1-1	ERC1	hsa-miR-133b	ENSG00000176165	FOXG1	0
chr12-1420263	rs117601704	chr12_1263034_1290012:+	circERC1-1	ERC1	hsa-miR-133a-3p	ENSG00000176165	FOXG1	0
chr12-1420263	rs117601704	chr12_1263034_1290012:+	circERC1-1	ERC1	hsa-miR-133b	ENSG00000176165	FOXG1	0
chr12-1328345	rs79543065	chr12_1263034_1290012:+	circERC1-1	ERC1	hsa-miR-29a-3p	ENSG00000176641	RNF152	0
chr12-1328345	rs79543065	chr12_1263034_1290012:+	circERC1-1	ERC1	hsa-miR-29b-3p	ENSG00000176641	RNF152	0
chr12-1328345	rs79543065	chr12_1263034_1290012:+	circERC1-1	ERC1	hsa-miR-29c-3p	ENSG00000176641	RNF152	0
chr12-1411392	rs80018118	chr12_1263034_1290012:+	circERC1-1	ERC1	hsa-miR-29a-3p	ENSG00000176641	RNF152	0
chr12-1411392	rs80018118	chr12_1263034_1290012:+	circERC1-1	ERC1	hsa-miR-29b-3p	ENSG00000176641	RNF152	0
chr12-1411392	rs80018118	chr12_1263034_1290012:+	circERC1-1	ERC1	hsa-miR-29c-3p	ENSG00000176641	RNF152	0
chr12-1420263	rs117601704	chr12_1263034_1290012:+	circERC1-1	ERC1	hsa-miR-29a-3p	ENSG00000176641	RNF152	0
chr12-1420263	rs117601704	chr12_1263034_1290012:+	circERC1-1	ERC1	hsa-miR-29b-3p	ENSG00000176641	RNF152	0
chr12-1420263	rs117601704	chr12_1263034_1290012:+	circERC1-1	ERC1	hsa-miR-29c-3p	ENSG00000176641	RNF152	0
chr12-1328345	rs79543065	chr12_1263034_1290012:+	circERC1-1	ERC1	hsa-miR-29a-3p	ENSG00000177082	WDR73	0
chr12-1328345	rs79543065	chr12_1263034_1290012:+	circERC1-1	ERC1	hsa-miR-29b-3p	ENSG00000177082	WDR73	0
chr12-1328345	rs79543065	chr12_1263034_1290012:+	circERC1-1	ERC1	hsa-miR-29c-3p	ENSG00000177082	WDR73	0
chr12-1411392	rs80018118	chr12_1263034_1290012:+	circERC1-1	ERC1	hsa-miR-29a-3p	ENSG00000177082	WDR73	0
chr12-1411392	rs80018118	chr12_1263034_1290012:+	circERC1-1	ERC1	hsa-miR-29b-3p	ENSG00000177082	WDR73	0
chr12-1411392	rs80018118	chr12_1263034_1290012:+	circERC1-1	ERC1	hsa-miR-29c-3p	ENSG00000177082	WDR73	0
chr12-1420263	rs117601704	chr12_1263034_1290012:+	circERC1-1	ERC1	hsa-miR-29a-3p	ENSG00000177082	WDR73	0
chr12-1420263	rs117601704	chr12_1263034_1290012:+	circERC1-1	ERC1	hsa-miR-29b-3p	ENSG00000177082	WDR73	0
chr12-1420263	rs117601704	chr12_1263034_1290012:+	circERC1-1	ERC1	hsa-miR-29c-3p	ENSG00000177082	WDR73	0
chr12-1328345	rs79543065	chr12_1263034_1290012:+	circERC1-1	ERC1	hsa-miR-133a-3p	ENSG00000177842	ZNF620	0
chr12-1328345	rs79543065	chr12_1263034_1290012:+	circERC1-1	ERC1	hsa-miR-133b	ENSG00000177842	ZNF620	0
chr12-1411392	rs80018118	chr12_1263034_1290012:+	circERC1-1	ERC1	hsa-miR-133a-3p	ENSG00000177842	ZNF620	0
chr12-1411392	rs80018118	chr12_1263034_1290012:+	circERC1-1	ERC1	hsa-miR-133b	ENSG00000177842	ZNF620	0
chr12-1420263	rs117601704	chr12_1263034_1290012:+	circERC1-1	ERC1	hsa-miR-133a-3p	ENSG00000177842	ZNF620	0
chr12-1420263	rs117601704	chr12_1263034_1290012:+	circERC1-1	ERC1	hsa-miR-133b	ENSG00000177842	ZNF620	0
chr12-1328345	rs79543065	chr12_1263034_1290012:+	circERC1-1	ERC1	hsa-miR-133a-3p	ENSG00000179152	TCAIM	0
chr12-1328345	rs79543065	chr12_1263034_1290012:+	circERC1-1	ERC1	hsa-miR-133b	ENSG00000179152	TCAIM	0
chr12-1411392	rs80018118	chr12_1263034_1290012:+	circERC1-1	ERC1	hsa-miR-133a-3p	ENSG00000179152	TCAIM	0
chr12-1411392	rs80018118	chr12_1263034_1290012:+	circERC1-1	ERC1	hsa-miR-133b	ENSG00000179152	TCAIM	0
chr12-1420263	rs117601704	chr12_1263034_1290012:+	circERC1-1	ERC1	hsa-miR-133a-3p	ENSG00000179152	TCAIM	0
chr12-1420263	rs117601704	chr12_1263034_1290012:+	circERC1-1	ERC1	hsa-miR-133b	ENSG00000179152	TCAIM	0
chr12-1328345	rs79543065	chr12_1263034_1290012:+	circERC1-1	ERC1	hsa-miR-133a-3p	ENSG00000180801	ARSJ	0
chr12-1328345	rs79543065	chr12_1263034_1290012:+	circERC1-1	ERC1	hsa-miR-133b	ENSG00000180801	ARSJ	0
chr12-1411392	rs80018118	chr12_1263034_1290012:+	circERC1-1	ERC1	hsa-miR-133a-3p	ENSG00000180801	ARSJ	0
chr12-1411392	rs80018118	chr12_1263034_1290012:+	circERC1-1	ERC1	hsa-miR-133b	ENSG00000180801	ARSJ	0
chr12-1420263	rs117601704	chr12_1263034_1290012:+	circERC1-1	ERC1	hsa-miR-133a-3p	ENSG00000180801	ARSJ	0
chr12-1420263	rs117601704	chr12_1263034_1290012:+	circERC1-1	ERC1	hsa-miR-133b	ENSG00000180801	ARSJ	0
chr12-1328345	rs79543065	chr12_1263034_1290012:+	circERC1-1	ERC1	hsa-miR-133a-3p	ENSG00000180901	KCTD2	0
chr12-1328345	rs79543065	chr12_1263034_1290012:+	circERC1-1	ERC1	hsa-miR-133b	ENSG00000180901	KCTD2	0
chr12-1328345	rs79543065	chr12_1263034_1290012:+	circERC1-1	ERC1	hsa-miR-29a-3p	ENSG00000180901	KCTD2	0
chr12-1328345	rs79543065	chr12_1263034_1290012:+	circERC1-1	ERC1	hsa-miR-29b-3p	ENSG00000180901	KCTD2	0
chr12-1328345	rs79543065	chr12_1263034_1290012:+	circERC1-1	ERC1	hsa-miR-29c-3p	ENSG00000180901	KCTD2	0
chr12-1411392	rs80018118	chr12_1263034_1290012:+	circERC1-1	ERC1	hsa-miR-133a-3p	ENSG00000180901	KCTD2	0
chr12-1411392	rs80018118	chr12_1263034_1290012:+	circERC1-1	ERC1	hsa-miR-133b	ENSG00000180901	KCTD2	0
chr12-1411392	rs80018118	chr12_1263034_1290012:+	circERC1-1	ERC1	hsa-miR-29a-3p	ENSG00000180901	KCTD2	0
chr12-1411392	rs80018118	chr12_1263034_1290012:+	circERC1-1	ERC1	hsa-miR-29b-3p	ENSG00000180901	KCTD2	0
chr12-1411392	rs80018118	chr12_1263034_1290012:+	circERC1-1	ERC1	hsa-miR-29c-3p	ENSG00000180901	KCTD2	0
chr12-1420263	rs117601704	chr12_1263034_1290012:+	circERC1-1	ERC1	hsa-miR-133a-3p	ENSG00000180901	KCTD2	0
chr12-1420263	rs117601704	chr12_1263034_1290012:+	circERC1-1	ERC1	hsa-miR-133b	ENSG00000180901	KCTD2	0
chr12-1420263	rs117601704	chr12_1263034_1290012:+	circERC1-1	ERC1	hsa-miR-29a-3p	ENSG00000180901	KCTD2	0
chr12-1420263	rs117601704	chr12_1263034_1290012:+	circERC1-1	ERC1	hsa-miR-29b-3p	ENSG00000180901	KCTD2	0
chr12-1420263	rs117601704	chr12_1263034_1290012:+	circERC1-1	ERC1	hsa-miR-29c-3p	ENSG00000180901	KCTD2	0
chr12-1328345	rs79543065	chr12_1263034_1290012:+	circERC1-1	ERC1	hsa-miR-29a-3p	ENSG00000181555	SETD2	0
chr12-1328345	rs79543065	chr12_1263034_1290012:+	circERC1-1	ERC1	hsa-miR-29b-3p	ENSG00000181555	SETD2	0
chr12-1328345	rs79543065	chr12_1263034_1290012:+	circERC1-1	ERC1	hsa-miR-29c-3p	ENSG00000181555	SETD2	0
chr12-1411392	rs80018118	chr12_1263034_1290012:+	circERC1-1	ERC1	hsa-miR-29a-3p	ENSG00000181555	SETD2	0
chr12-1411392	rs80018118	chr12_1263034_1290012:+	circERC1-1	ERC1	hsa-miR-29b-3p	ENSG00000181555	SETD2	0
chr12-1411392	rs80018118	chr12_1263034_1290012:+	circERC1-1	ERC1	hsa-miR-29c-3p	ENSG00000181555	SETD2	0
chr12-1420263	rs117601704	chr12_1263034_1290012:+	circERC1-1	ERC1	hsa-miR-29a-3p	ENSG00000181555	SETD2	0
chr12-1420263	rs117601704	chr12_1263034_1290012:+	circERC1-1	ERC1	hsa-miR-29b-3p	ENSG00000181555	SETD2	0
chr12-1420263	rs117601704	chr12_1263034_1290012:+	circERC1-1	ERC1	hsa-miR-29c-3p	ENSG00000181555	SETD2	0
chr12-1328345	rs79543065	chr12_1263034_1290012:+	circERC1-1	ERC1	hsa-miR-29a-3p	ENSG00000182963	GJC1	0
chr12-1328345	rs79543065	chr12_1263034_1290012:+	circERC1-1	ERC1	hsa-miR-29b-3p	ENSG00000182963	GJC1	0
chr12-1328345	rs79543065	chr12_1263034_1290012:+	circERC1-1	ERC1	hsa-miR-29c-3p	ENSG00000182963	GJC1	0
chr12-1411392	rs80018118	chr12_1263034_1290012:+	circERC1-1	ERC1	hsa-miR-29a-3p	ENSG00000182963	GJC1	0
chr12-1411392	rs80018118	chr12_1263034_1290012:+	circERC1-1	ERC1	hsa-miR-29b-3p	ENSG00000182963	GJC1	0
chr12-1411392	rs80018118	chr12_1263034_1290012:+	circERC1-1	ERC1	hsa-miR-29c-3p	ENSG00000182963	GJC1	0
chr12-1420263	rs117601704	chr12_1263034_1290012:+	circERC1-1	ERC1	hsa-miR-29a-3p	ENSG00000182963	GJC1	0
chr12-1420263	rs117601704	chr12_1263034_1290012:+	circERC1-1	ERC1	hsa-miR-29b-3p	ENSG00000182963	GJC1	0
chr12-1420263	rs117601704	chr12_1263034_1290012:+	circERC1-1	ERC1	hsa-miR-29c-3p	ENSG00000182963	GJC1	0
chr12-1328345	rs79543065	chr12_1263034_1290012:+	circERC1-1	ERC1	hsa-miR-133a-3p	ENSG00000182983	ZNF662	0
chr12-1328345	rs79543065	chr12_1263034_1290012:+	circERC1-1	ERC1	hsa-miR-133b	ENSG00000182983	ZNF662	0
chr12-1328345	rs79543065	chr12_1263034_1290012:+	circERC1-1	ERC1	hsa-miR-29a-3p	ENSG00000182983	ZNF662	0
chr12-1328345	rs79543065	chr12_1263034_1290012:+	circERC1-1	ERC1	hsa-miR-29b-3p	ENSG00000182983	ZNF662	0
chr12-1328345	rs79543065	chr12_1263034_1290012:+	circERC1-1	ERC1	hsa-miR-29c-3p	ENSG00000182983	ZNF662	0
chr12-1411392	rs80018118	chr12_1263034_1290012:+	circERC1-1	ERC1	hsa-miR-133a-3p	ENSG00000182983	ZNF662	0
chr12-1411392	rs80018118	chr12_1263034_1290012:+	circERC1-1	ERC1	hsa-miR-133b	ENSG00000182983	ZNF662	0
chr12-1411392	rs80018118	chr12_1263034_1290012:+	circERC1-1	ERC1	hsa-miR-29a-3p	ENSG00000182983	ZNF662	0
chr12-1411392	rs80018118	chr12_1263034_1290012:+	circERC1-1	ERC1	hsa-miR-29b-3p	ENSG00000182983	ZNF662	0
chr12-1411392	rs80018118	chr12_1263034_1290012:+	circERC1-1	ERC1	hsa-miR-29c-3p	ENSG00000182983	ZNF662	0
chr12-1420263	rs117601704	chr12_1263034_1290012:+	circERC1-1	ERC1	hsa-miR-133a-3p	ENSG00000182983	ZNF662	0
chr12-1420263	rs117601704	chr12_1263034_1290012:+	circERC1-1	ERC1	hsa-miR-133b	ENSG00000182983	ZNF662	0
chr12-1420263	rs117601704	chr12_1263034_1290012:+	circERC1-1	ERC1	hsa-miR-29a-3p	ENSG00000182983	ZNF662	0
chr12-1420263	rs117601704	chr12_1263034_1290012:+	circERC1-1	ERC1	hsa-miR-29b-3p	ENSG00000182983	ZNF662	0
chr12-1420263	rs117601704	chr12_1263034_1290012:+	circERC1-1	ERC1	hsa-miR-29c-3p	ENSG00000182983	ZNF662	0
chr12-1328345	rs79543065	chr12_1263034_1290012:+	circERC1-1	ERC1	hsa-miR-133a-3p	ENSG00000183354	KIAA2026	0
chr12-1328345	rs79543065	chr12_1263034_1290012:+	circERC1-1	ERC1	hsa-miR-133b	ENSG00000183354	KIAA2026	0
chr12-1411392	rs80018118	chr12_1263034_1290012:+	circERC1-1	ERC1	hsa-miR-133a-3p	ENSG00000183354	KIAA2026	0
chr12-1411392	rs80018118	chr12_1263034_1290012:+	circERC1-1	ERC1	hsa-miR-133b	ENSG00000183354	KIAA2026	0
chr12-1420263	rs117601704	chr12_1263034_1290012:+	circERC1-1	ERC1	hsa-miR-133a-3p	ENSG00000183354	KIAA2026	0
chr12-1420263	rs117601704	chr12_1263034_1290012:+	circERC1-1	ERC1	hsa-miR-133b	ENSG00000183354	KIAA2026	0
chr12-1328345	rs79543065	chr12_1263034_1290012:+	circERC1-1	ERC1	hsa-miR-133a-3p	ENSG00000183722	LHFPL6	0
chr12-1328345	rs79543065	chr12_1263034_1290012:+	circERC1-1	ERC1	hsa-miR-133b	ENSG00000183722	LHFPL6	0
chr12-1411392	rs80018118	chr12_1263034_1290012:+	circERC1-1	ERC1	hsa-miR-133a-3p	ENSG00000183722	LHFPL6	0
chr12-1411392	rs80018118	chr12_1263034_1290012:+	circERC1-1	ERC1	hsa-miR-133b	ENSG00000183722	LHFPL6	0
chr12-1420263	rs117601704	chr12_1263034_1290012:+	circERC1-1	ERC1	hsa-miR-133a-3p	ENSG00000183722	LHFPL6	0
chr12-1420263	rs117601704	chr12_1263034_1290012:+	circERC1-1	ERC1	hsa-miR-133b	ENSG00000183722	LHFPL6	0
chr12-1328345	rs79543065	chr12_1263034_1290012:+	circERC1-1	ERC1	hsa-miR-133a-3p	ENSG00000184185	KCNJ12	0
chr12-1328345	rs79543065	chr12_1263034_1290012:+	circERC1-1	ERC1	hsa-miR-133b	ENSG00000184185	KCNJ12	0
chr12-1328345	rs79543065	chr12_1263034_1290012:+	circERC1-1	ERC1	hsa-miR-29a-3p	ENSG00000184185	KCNJ12	0
chr12-1328345	rs79543065	chr12_1263034_1290012:+	circERC1-1	ERC1	hsa-miR-29b-3p	ENSG00000184185	KCNJ12	0
chr12-1328345	rs79543065	chr12_1263034_1290012:+	circERC1-1	ERC1	hsa-miR-29c-3p	ENSG00000184185	KCNJ12	0
chr12-1411392	rs80018118	chr12_1263034_1290012:+	circERC1-1	ERC1	hsa-miR-133a-3p	ENSG00000184185	KCNJ12	0
chr12-1411392	rs80018118	chr12_1263034_1290012:+	circERC1-1	ERC1	hsa-miR-133b	ENSG00000184185	KCNJ12	0
chr12-1411392	rs80018118	chr12_1263034_1290012:+	circERC1-1	ERC1	hsa-miR-29a-3p	ENSG00000184185	KCNJ12	0
chr12-1411392	rs80018118	chr12_1263034_1290012:+	circERC1-1	ERC1	hsa-miR-29b-3p	ENSG00000184185	KCNJ12	0
chr12-1411392	rs80018118	chr12_1263034_1290012:+	circERC1-1	ERC1	hsa-miR-29c-3p	ENSG00000184185	KCNJ12	0
chr12-1420263	rs117601704	chr12_1263034_1290012:+	circERC1-1	ERC1	hsa-miR-133a-3p	ENSG00000184185	KCNJ12	0
chr12-1420263	rs117601704	chr12_1263034_1290012:+	circERC1-1	ERC1	hsa-miR-133b	ENSG00000184185	KCNJ12	0
chr12-1420263	rs117601704	chr12_1263034_1290012:+	circERC1-1	ERC1	hsa-miR-29a-3p	ENSG00000184185	KCNJ12	0
chr12-1420263	rs117601704	chr12_1263034_1290012:+	circERC1-1	ERC1	hsa-miR-29b-3p	ENSG00000184185	KCNJ12	0
chr12-1420263	rs117601704	chr12_1263034_1290012:+	circERC1-1	ERC1	hsa-miR-29c-3p	ENSG00000184185	KCNJ12	0
chr12-1328345	rs79543065	chr12_1263034_1290012:+	circERC1-1	ERC1	hsa-miR-29a-3p	ENSG00000185436	IFNLR1	0
chr12-1328345	rs79543065	chr12_1263034_1290012:+	circERC1-1	ERC1	hsa-miR-29b-3p	ENSG00000185436	IFNLR1	0
chr12-1328345	rs79543065	chr12_1263034_1290012:+	circERC1-1	ERC1	hsa-miR-29c-3p	ENSG00000185436	IFNLR1	0
chr12-1411392	rs80018118	chr12_1263034_1290012:+	circERC1-1	ERC1	hsa-miR-29a-3p	ENSG00000185436	IFNLR1	0
chr12-1411392	rs80018118	chr12_1263034_1290012:+	circERC1-1	ERC1	hsa-miR-29b-3p	ENSG00000185436	IFNLR1	0
chr12-1411392	rs80018118	chr12_1263034_1290012:+	circERC1-1	ERC1	hsa-miR-29c-3p	ENSG00000185436	IFNLR1	0
chr12-1420263	rs117601704	chr12_1263034_1290012:+	circERC1-1	ERC1	hsa-miR-29a-3p	ENSG00000185436	IFNLR1	0
chr12-1420263	rs117601704	chr12_1263034_1290012:+	circERC1-1	ERC1	hsa-miR-29b-3p	ENSG00000185436	IFNLR1	0
chr12-1420263	rs117601704	chr12_1263034_1290012:+	circERC1-1	ERC1	hsa-miR-29c-3p	ENSG00000185436	IFNLR1	0
chr12-1328345	rs79543065	chr12_1263034_1290012:+	circERC1-1	ERC1	hsa-miR-133a-3p	ENSG00000185477	GPRIN3	0
chr12-1328345	rs79543065	chr12_1263034_1290012:+	circERC1-1	ERC1	hsa-miR-133b	ENSG00000185477	GPRIN3	0
chr12-1328345	rs79543065	chr12_1263034_1290012:+	circERC1-1	ERC1	hsa-miR-29a-3p	ENSG00000185477	GPRIN3	0
chr12-1328345	rs79543065	chr12_1263034_1290012:+	circERC1-1	ERC1	hsa-miR-29b-3p	ENSG00000185477	GPRIN3	0
chr12-1328345	rs79543065	chr12_1263034_1290012:+	circERC1-1	ERC1	hsa-miR-29c-3p	ENSG00000185477	GPRIN3	0
chr12-1411392	rs80018118	chr12_1263034_1290012:+	circERC1-1	ERC1	hsa-miR-133a-3p	ENSG00000185477	GPRIN3	0
chr12-1411392	rs80018118	chr12_1263034_1290012:+	circERC1-1	ERC1	hsa-miR-133b	ENSG00000185477	GPRIN3	0
chr12-1411392	rs80018118	chr12_1263034_1290012:+	circERC1-1	ERC1	hsa-miR-29a-3p	ENSG00000185477	GPRIN3	0
chr12-1411392	rs80018118	chr12_1263034_1290012:+	circERC1-1	ERC1	hsa-miR-29b-3p	ENSG00000185477	GPRIN3	0
chr12-1411392	rs80018118	chr12_1263034_1290012:+	circERC1-1	ERC1	hsa-miR-29c-3p	ENSG00000185477	GPRIN3	0
chr12-1420263	rs117601704	chr12_1263034_1290012:+	circERC1-1	ERC1	hsa-miR-133a-3p	ENSG00000185477	GPRIN3	0
chr12-1420263	rs117601704	chr12_1263034_1290012:+	circERC1-1	ERC1	hsa-miR-133b	ENSG00000185477	GPRIN3	0
chr12-1420263	rs117601704	chr12_1263034_1290012:+	circERC1-1	ERC1	hsa-miR-29a-3p	ENSG00000185477	GPRIN3	0
chr12-1420263	rs117601704	chr12_1263034_1290012:+	circERC1-1	ERC1	hsa-miR-29b-3p	ENSG00000185477	GPRIN3	0
chr12-1420263	rs117601704	chr12_1263034_1290012:+	circERC1-1	ERC1	hsa-miR-29c-3p	ENSG00000185477	GPRIN3	0
chr12-1328345	rs79543065	chr12_1263034_1290012:+	circERC1-1	ERC1	hsa-miR-29a-3p	ENSG00000185504	FAAP100	0
chr12-1328345	rs79543065	chr12_1263034_1290012:+	circERC1-1	ERC1	hsa-miR-29b-3p	ENSG00000185504	FAAP100	0
chr12-1328345	rs79543065	chr12_1263034_1290012:+	circERC1-1	ERC1	hsa-miR-29c-3p	ENSG00000185504	FAAP100	0
chr12-1411392	rs80018118	chr12_1263034_1290012:+	circERC1-1	ERC1	hsa-miR-29a-3p	ENSG00000185504	FAAP100	0
chr12-1411392	rs80018118	chr12_1263034_1290012:+	circERC1-1	ERC1	hsa-miR-29b-3p	ENSG00000185504	FAAP100	0
chr12-1411392	rs80018118	chr12_1263034_1290012:+	circERC1-1	ERC1	hsa-miR-29c-3p	ENSG00000185504	FAAP100	0
chr12-1420263	rs117601704	chr12_1263034_1290012:+	circERC1-1	ERC1	hsa-miR-29a-3p	ENSG00000185504	FAAP100	0
chr12-1420263	rs117601704	chr12_1263034_1290012:+	circERC1-1	ERC1	hsa-miR-29b-3p	ENSG00000185504	FAAP100	0
chr12-1420263	rs117601704	chr12_1263034_1290012:+	circERC1-1	ERC1	hsa-miR-29c-3p	ENSG00000185504	FAAP100	0
chr12-1328345	rs79543065	chr12_1263034_1290012:+	circERC1-1	ERC1	hsa-miR-29a-3p	ENSG00000185619	PCGF3	0
chr12-1328345	rs79543065	chr12_1263034_1290012:+	circERC1-1	ERC1	hsa-miR-29b-3p	ENSG00000185619	PCGF3	0
chr12-1328345	rs79543065	chr12_1263034_1290012:+	circERC1-1	ERC1	hsa-miR-29c-3p	ENSG00000185619	PCGF3	0
chr12-1411392	rs80018118	chr12_1263034_1290012:+	circERC1-1	ERC1	hsa-miR-29a-3p	ENSG00000185619	PCGF3	0
chr12-1411392	rs80018118	chr12_1263034_1290012:+	circERC1-1	ERC1	hsa-miR-29b-3p	ENSG00000185619	PCGF3	0
chr12-1411392	rs80018118	chr12_1263034_1290012:+	circERC1-1	ERC1	hsa-miR-29c-3p	ENSG00000185619	PCGF3	0
chr12-1420263	rs117601704	chr12_1263034_1290012:+	circERC1-1	ERC1	hsa-miR-29a-3p	ENSG00000185619	PCGF3	0
chr12-1420263	rs117601704	chr12_1263034_1290012:+	circERC1-1	ERC1	hsa-miR-29b-3p	ENSG00000185619	PCGF3	0
chr12-1420263	rs117601704	chr12_1263034_1290012:+	circERC1-1	ERC1	hsa-miR-29c-3p	ENSG00000185619	PCGF3	0
chr12-1328345	rs79543065	chr12_1263034_1290012:+	circERC1-1	ERC1	hsa-miR-29a-3p	ENSG00000186184	POLR1D	0
chr12-1328345	rs79543065	chr12_1263034_1290012:+	circERC1-1	ERC1	hsa-miR-29b-3p	ENSG00000186184	POLR1D	0
chr12-1328345	rs79543065	chr12_1263034_1290012:+	circERC1-1	ERC1	hsa-miR-29c-3p	ENSG00000186184	POLR1D	0
chr12-1411392	rs80018118	chr12_1263034_1290012:+	circERC1-1	ERC1	hsa-miR-29a-3p	ENSG00000186184	POLR1D	0
chr12-1411392	rs80018118	chr12_1263034_1290012:+	circERC1-1	ERC1	hsa-miR-29b-3p	ENSG00000186184	POLR1D	0
chr12-1411392	rs80018118	chr12_1263034_1290012:+	circERC1-1	ERC1	hsa-miR-29c-3p	ENSG00000186184	POLR1D	0
chr12-1420263	rs117601704	chr12_1263034_1290012:+	circERC1-1	ERC1	hsa-miR-29a-3p	ENSG00000186184	POLR1D	0
chr12-1420263	rs117601704	chr12_1263034_1290012:+	circERC1-1	ERC1	hsa-miR-29b-3p	ENSG00000186184	POLR1D	0
chr12-1420263	rs117601704	chr12_1263034_1290012:+	circERC1-1	ERC1	hsa-miR-29c-3p	ENSG00000186184	POLR1D	0
chr12-1328345	rs79543065	chr12_1263034_1290012:+	circERC1-1	ERC1	hsa-miR-29a-3p	ENSG00000189079	ARID2	0
chr12-1328345	rs79543065	chr12_1263034_1290012:+	circERC1-1	ERC1	hsa-miR-29b-3p	ENSG00000189079	ARID2	0
chr12-1328345	rs79543065	chr12_1263034_1290012:+	circERC1-1	ERC1	hsa-miR-29c-3p	ENSG00000189079	ARID2	0
chr12-1411392	rs80018118	chr12_1263034_1290012:+	circERC1-1	ERC1	hsa-miR-29a-3p	ENSG00000189079	ARID2	0
chr12-1411392	rs80018118	chr12_1263034_1290012:+	circERC1-1	ERC1	hsa-miR-29b-3p	ENSG00000189079	ARID2	0
chr12-1411392	rs80018118	chr12_1263034_1290012:+	circERC1-1	ERC1	hsa-miR-29c-3p	ENSG00000189079	ARID2	0
chr12-1420263	rs117601704	chr12_1263034_1290012:+	circERC1-1	ERC1	hsa-miR-29a-3p	ENSG00000189079	ARID2	0
chr12-1420263	rs117601704	chr12_1263034_1290012:+	circERC1-1	ERC1	hsa-miR-29b-3p	ENSG00000189079	ARID2	0
chr12-1420263	rs117601704	chr12_1263034_1290012:+	circERC1-1	ERC1	hsa-miR-29c-3p	ENSG00000189079	ARID2	0
chr12-1328345	rs79543065	chr12_1263034_1290012:+	circERC1-1	ERC1	hsa-miR-133a-3p	ENSG00000189180	ZNF33A	0
chr12-1328345	rs79543065	chr12_1263034_1290012:+	circERC1-1	ERC1	hsa-miR-133b	ENSG00000189180	ZNF33A	0
chr12-1411392	rs80018118	chr12_1263034_1290012:+	circERC1-1	ERC1	hsa-miR-133a-3p	ENSG00000189180	ZNF33A	0
chr12-1411392	rs80018118	chr12_1263034_1290012:+	circERC1-1	ERC1	hsa-miR-133b	ENSG00000189180	ZNF33A	0
chr12-1420263	rs117601704	chr12_1263034_1290012:+	circERC1-1	ERC1	hsa-miR-133a-3p	ENSG00000189180	ZNF33A	0
chr12-1420263	rs117601704	chr12_1263034_1290012:+	circERC1-1	ERC1	hsa-miR-133b	ENSG00000189180	ZNF33A	0
chr12-1328345	rs79543065	chr12_1263034_1290012:+	circERC1-1	ERC1	hsa-miR-133a-3p	ENSG00000196693	ZNF33B	0
chr12-1328345	rs79543065	chr12_1263034_1290012:+	circERC1-1	ERC1	hsa-miR-133b	ENSG00000196693	ZNF33B	0
chr12-1411392	rs80018118	chr12_1263034_1290012:+	circERC1-1	ERC1	hsa-miR-133a-3p	ENSG00000196693	ZNF33B	0
chr12-1411392	rs80018118	chr12_1263034_1290012:+	circERC1-1	ERC1	hsa-miR-133b	ENSG00000196693	ZNF33B	0
chr12-1420263	rs117601704	chr12_1263034_1290012:+	circERC1-1	ERC1	hsa-miR-133a-3p	ENSG00000196693	ZNF33B	0
chr12-1420263	rs117601704	chr12_1263034_1290012:+	circERC1-1	ERC1	hsa-miR-133b	ENSG00000196693	ZNF33B	0
chr12-1328345	rs79543065	chr12_1263034_1290012:+	circERC1-1	ERC1	hsa-miR-29a-3p	ENSG00000196739	COL27A1	0
chr12-1328345	rs79543065	chr12_1263034_1290012:+	circERC1-1	ERC1	hsa-miR-29b-3p	ENSG00000196739	COL27A1	0
chr12-1328345	rs79543065	chr12_1263034_1290012:+	circERC1-1	ERC1	hsa-miR-29c-3p	ENSG00000196739	COL27A1	0
chr12-1411392	rs80018118	chr12_1263034_1290012:+	circERC1-1	ERC1	hsa-miR-29a-3p	ENSG00000196739	COL27A1	0
chr12-1411392	rs80018118	chr12_1263034_1290012:+	circERC1-1	ERC1	hsa-miR-29b-3p	ENSG00000196739	COL27A1	0
chr12-1411392	rs80018118	chr12_1263034_1290012:+	circERC1-1	ERC1	hsa-miR-29c-3p	ENSG00000196739	COL27A1	0
chr12-1420263	rs117601704	chr12_1263034_1290012:+	circERC1-1	ERC1	hsa-miR-29a-3p	ENSG00000196739	COL27A1	0
chr12-1420263	rs117601704	chr12_1263034_1290012:+	circERC1-1	ERC1	hsa-miR-29b-3p	ENSG00000196739	COL27A1	0
chr12-1420263	rs117601704	chr12_1263034_1290012:+	circERC1-1	ERC1	hsa-miR-29c-3p	ENSG00000196739	COL27A1	0
chr12-1328345	rs79543065	chr12_1263034_1290012:+	circERC1-1	ERC1	hsa-miR-133a-3p	ENSG00000196782	MAML3	0
chr12-1328345	rs79543065	chr12_1263034_1290012:+	circERC1-1	ERC1	hsa-miR-133b	ENSG00000196782	MAML3	0
chr12-1411392	rs80018118	chr12_1263034_1290012:+	circERC1-1	ERC1	hsa-miR-133a-3p	ENSG00000196782	MAML3	0
chr12-1411392	rs80018118	chr12_1263034_1290012:+	circERC1-1	ERC1	hsa-miR-133b	ENSG00000196782	MAML3	0
chr12-1420263	rs117601704	chr12_1263034_1290012:+	circERC1-1	ERC1	hsa-miR-133a-3p	ENSG00000196782	MAML3	0
chr12-1420263	rs117601704	chr12_1263034_1290012:+	circERC1-1	ERC1	hsa-miR-133b	ENSG00000196782	MAML3	0
chr12-1328345	rs79543065	chr12_1263034_1290012:+	circERC1-1	ERC1	hsa-miR-29a-3p	ENSG00000198089	SFI1	0
chr12-1328345	rs79543065	chr12_1263034_1290012:+	circERC1-1	ERC1	hsa-miR-29b-3p	ENSG00000198089	SFI1	0
chr12-1328345	rs79543065	chr12_1263034_1290012:+	circERC1-1	ERC1	hsa-miR-29c-3p	ENSG00000198089	SFI1	0
chr12-1411392	rs80018118	chr12_1263034_1290012:+	circERC1-1	ERC1	hsa-miR-29a-3p	ENSG00000198089	SFI1	0
chr12-1411392	rs80018118	chr12_1263034_1290012:+	circERC1-1	ERC1	hsa-miR-29b-3p	ENSG00000198089	SFI1	0
chr12-1411392	rs80018118	chr12_1263034_1290012:+	circERC1-1	ERC1	hsa-miR-29c-3p	ENSG00000198089	SFI1	0
chr12-1420263	rs117601704	chr12_1263034_1290012:+	circERC1-1	ERC1	hsa-miR-29a-3p	ENSG00000198089	SFI1	0
chr12-1420263	rs117601704	chr12_1263034_1290012:+	circERC1-1	ERC1	hsa-miR-29b-3p	ENSG00000198089	SFI1	0
[truncated: 9,885 more rows]

## Sheet: circRNA-RBP-gene
circRNA			RBP		trans-eGene
circRNA ID	circRNA name	Host gene symbol	RBP	Gene symbol	trans-eGene	trans-eGene symbol
chr1_169230718_169287408:-	circNME7	NME7	ENSG00000100813	ACIN1	ENSG00000002330	BAD
chr1_169230718_169287408:-	circNME7	NME7	ENSG00000100813	ACIN1	ENSG00000063180	CA11
chr6_18236452_18258405:-	circDEK	DEK	ENSG00000100813	ACIN1	ENSG00000074266	EED
chr6_18236452_18258405:-	circDEK	DEK	ENSG00000156709	AIFM1	ENSG00000074266	EED
chr6_18236452_18258405:-	circDEK	DEK	ENSG00000183684	ALYREF	ENSG00000074266	EED
chr6_18236452_18258405:-	circDEK	DEK	ENSG00000100813	ACIN1	ENSG00000088448	ANKRD10
chr6_18236452_18258405:-	circDEK	DEK	ENSG00000156709	AIFM1	ENSG00000088448	ANKRD10
chr6_18236452_18258405:-	circDEK	DEK	ENSG00000183684	ALYREF	ENSG00000088448	ANKRD10
chr1_169230718_169287408:-	circNME7	NME7	ENSG00000100813	ACIN1	ENSG00000099800	TIMM13
chr6_18236452_18258405:-	circDEK	DEK	ENSG00000100813	ACIN1	ENSG00000101407	TTI1
chr6_18236452_18258405:-	circDEK	DEK	ENSG00000156709	AIFM1	ENSG00000101407	TTI1
chr6_18236452_18258405:-	circDEK	DEK	ENSG00000183684	ALYREF	ENSG00000101407	TTI1
chr6_18236452_18258405:-	circDEK	DEK	ENSG00000100813	ACIN1	ENSG00000102710	SUPT20H
chr6_18236452_18258405:-	circDEK	DEK	ENSG00000156709	AIFM1	ENSG00000102710	SUPT20H
chr6_18236452_18258405:-	circDEK	DEK	ENSG00000183684	ALYREF	ENSG00000102710	SUPT20H
chr1_169230718_169287408:-	circNME7	NME7	ENSG00000100813	ACIN1	ENSG00000104979	C19orf53
chr12_70684127_70701323:-	circPTPRR	PTPRR	ENSG00000100813	ACIN1	ENSG00000111700	SLCO1B3
chr6_18236452_18258405:-	circDEK	DEK	ENSG00000100813	ACIN1	ENSG00000112062	MAPK14
chr6_18236452_18258405:-	circDEK	DEK	ENSG00000156709	AIFM1	ENSG00000112062	MAPK14
chr6_18236452_18258405:-	circDEK	DEK	ENSG00000183684	ALYREF	ENSG00000112062	MAPK14
chr6_18236452_18258405:-	circDEK	DEK	ENSG00000156709	AIFM1	ENSG00000117020	AKT3
chr6_18236452_18258405:-	circDEK	DEK	ENSG00000100813	ACIN1	ENSG00000122257	RBBP6
chr6_18236452_18258405:-	circDEK	DEK	ENSG00000156709	AIFM1	ENSG00000122257	RBBP6
chr6_18236452_18258405:-	circDEK	DEK	ENSG00000183684	ALYREF	ENSG00000122257	RBBP6
chr1_92563642_92607727:-	circEVI5	EVI5	ENSG00000100813	ACIN1	ENSG00000123358	NR4A1
chr6_18236452_18258405:-	circDEK	DEK	ENSG00000100813	ACIN1	ENSG00000126012	KDM5C
chr6_18236452_18258405:-	circDEK	DEK	ENSG00000156709	AIFM1	ENSG00000126012	KDM5C
chr6_18236452_18258405:-	circDEK	DEK	ENSG00000183684	ALYREF	ENSG00000126012	KDM5C
chr6_130955105_130956499:-	circEPB41L2	EPB41L2	ENSG00000156709	AIFM1	ENSG00000126698	DNAJC8
chr1_169230718_169287408:-	circNME7	NME7	ENSG00000100813	ACIN1	ENSG00000133142	TCEAL4
chr12_48939655_48941188:-	circAC073610.3,ARF3	AC073610.3,ARF3	ENSG00000100813	ACIN1	ENSG00000134222	PSRC1
chr12_48939655_48941188:-	circAC073610.3,ARF3	AC073610.3,ARF3	ENSG00000156709	AIFM1	ENSG00000134222	PSRC1
chr6_18236452_18258405:-	circDEK	DEK	ENSG00000156709	AIFM1	ENSG00000135097	MSI1
chr6_18236452_18258405:-	circDEK	DEK	ENSG00000100813	ACIN1	ENSG00000145191	EIF2B5
chr6_18236452_18258405:-	circDEK	DEK	ENSG00000183684	ALYREF	ENSG00000145191	EIF2B5
chr6_18236452_18258405:-	circDEK	DEK	ENSG00000100813	ACIN1	ENSG00000153914	SREK1
chr6_18236452_18258405:-	circDEK	DEK	ENSG00000156709	AIFM1	ENSG00000153914	SREK1
chr6_18236452_18258405:-	circDEK	DEK	ENSG00000183684	ALYREF	ENSG00000153914	SREK1
chr6_18236452_18258405:-	circDEK	DEK	ENSG00000100813	ACIN1	ENSG00000172057	ORMDL3
chr6_18236452_18258405:-	circDEK	DEK	ENSG00000156709	AIFM1	ENSG00000172057	ORMDL3
chr1_169230718_169287408:-	circNME7	NME7	ENSG00000100813	ACIN1	ENSG00000175550	DRAP1
chr6_18236452_18258405:-	circDEK	DEK	ENSG00000100813	ACIN1	ENSG00000184787	UBE2G2
chr6_18236452_18258405:-	circDEK	DEK	ENSG00000156709	AIFM1	ENSG00000184787	UBE2G2
chr6_18236452_18258405:-	circDEK	DEK	ENSG00000183684	ALYREF	ENSG00000184787	UBE2G2
chr12_48939655_48941188:-	circAC073610.3,ARF3	AC073610.3,ARF3	ENSG00000156709	AIFM1	ENSG00000185164	NOMO2
chr6_18236452_18258405:-	circDEK	DEK	ENSG00000100813	ACIN1	ENSG00000196387	ZNF140
chr6_18236452_18258405:-	circDEK	DEK	ENSG00000156709	AIFM1	ENSG00000196387	ZNF140
chr1_169230718_169287408:-	circNME7	NME7	ENSG00000100813	ACIN1	ENSG00000198356	ASNA1
chr6_18236452_18258405:-	circDEK	DEK	ENSG00000156709	AIFM1	ENSG00000198892	SHISA4
chr6_18236452_18258405:-	circDEK	DEK	ENSG00000156709	AIFM1	ENSG00000215612	HMX1
chr6_18236452_18258405:-	circDEK	DEK	ENSG00000100813	ACIN1	ENSG00000247626	MARS2
chr6_18236452_18258405:-	circDEK	DEK	ENSG00000156709	AIFM1	ENSG00000247626	MARS2
chr6_18236452_18258405:-	circDEK	DEK	ENSG00000183684	ALYREF	ENSG00000247626	MARS2
chr1_169230718_169287408:-	circNME7	NME7	ENSG00000100813	ACIN1	ENSG00000267673	FDX2

## Sheet: circQTL-circRNA-RBP-gene
circQTL		circRNA			RBP		trans-eGene
SNP_locus	circQTL SNP_ID	circRNA ID	circRNA name	Host gene symbol	RBP	Gene symbol	trans-eGene	trans-eGene symbol
chr1-169041481	rs115926383	chr1_169230718_169287408:-	circNME7	NME7	ENSG00000100813	ACIN1	ENSG00000002330	BAD
chr1-169041481	rs115926383	chr1_169230718_169287408:-	circNME7	NME7	ENSG00000100813	ACIN1	ENSG00000063180	CA11
chr1-169041481	rs115926383	chr1_169230718_169287408:-	circNME7	NME7	ENSG00000100813	ACIN1	ENSG00000099800	TIMM13
chr1-169041481	rs115926383	chr1_169230718_169287408:-	circNME7	NME7	ENSG00000100813	ACIN1	ENSG00000104979	C19orf53
chr1-169041481	rs115926383	chr1_169230718_169287408:-	circNME7	NME7	ENSG00000100813	ACIN1	ENSG00000133142	TCEAL4
chr1-169041481	rs115926383	chr1_169230718_169287408:-	circNME7	NME7	ENSG00000100813	ACIN1	ENSG00000175550	DRAP1
chr1-169041481	rs115926383	chr1_169230718_169287408:-	circNME7	NME7	ENSG00000100813	ACIN1	ENSG00000198356	ASNA1
chr1-169041481	rs115926383	chr1_169230718_169287408:-	circNME7	NME7	ENSG00000100813	ACIN1	ENSG00000267673	FDX2
chr1-92788814	rs12098062	chr1_92563642_92607727:-	circEVI5	EVI5	ENSG00000100813	ACIN1	ENSG00000123358	NR4A1
chr12-48876216	rs11168769	chr12_48939655_48941188:-	circAC073610.3,ARF3	AC073610.3,ARF3	ENSG00000100813	ACIN1	ENSG00000134222	PSRC1
chr12-48876216	rs11168769	chr12_48939655_48941188:-	circAC073610.3,ARF3	AC073610.3,ARF3	ENSG00000156709	AIFM1	ENSG00000134222	PSRC1
chr12-48862015	rs1565933	chr12_48939655_48941188:-	circAC073610.3,ARF3	AC073610.3,ARF3	ENSG00000156709	AIFM1	ENSG00000185164	NOMO2
chr12-48863009	rs3782360	chr12_48939655_48941188:-	circAC073610.3,ARF3	AC073610.3,ARF3	ENSG00000156709	AIFM1	ENSG00000185164	NOMO2
chr12-48863545	rs10783285	chr12_48939655_48941188:-	circAC073610.3,ARF3	AC073610.3,ARF3	ENSG00000156709	AIFM1	ENSG00000185164	NOMO2
chr12-48863819	rs4760597	chr12_48939655_48941188:-	circAC073610.3,ARF3	AC073610.3,ARF3	ENSG00000156709	AIFM1	ENSG00000185164	NOMO2
chr12-48866908	rs10875882	chr12_48939655_48941188:-	circAC073610.3,ARF3	AC073610.3,ARF3	ENSG00000156709	AIFM1	ENSG00000185164	NOMO2
chr12-48867723	rs4760639	chr12_48939655_48941188:-	circAC073610.3,ARF3	AC073610.3,ARF3	ENSG00000156709	AIFM1	ENSG00000185164	NOMO2
chr12-48869078	rs4760599	chr12_48939655_48941188:-	circAC073610.3,ARF3	AC073610.3,ARF3	ENSG00000156709	AIFM1	ENSG00000185164	NOMO2
chr12-48876216	rs11168769	chr12_48939655_48941188:-	circAC073610.3,ARF3	AC073610.3,ARF3	ENSG00000156709	AIFM1	ENSG00000185164	NOMO2
chr12-48877671	rs3864901	chr12_48939655_48941188:-	circAC073610.3,ARF3	AC073610.3,ARF3	ENSG00000156709	AIFM1	ENSG00000185164	NOMO2
chr12-48884860	rs4760647	chr12_48939655_48941188:-	circAC073610.3,ARF3	AC073610.3,ARF3	ENSG00000156709	AIFM1	ENSG00000185164	NOMO2
chr12-48893667	rs10875885	chr12_48939655_48941188:-	circAC073610.3,ARF3	AC073610.3,ARF3	ENSG00000156709	AIFM1	ENSG00000185164	NOMO2
chr12-48894846	rs11168779	chr12_48939655_48941188:-	circAC073610.3,ARF3	AC073610.3,ARF3	ENSG00000156709	AIFM1	ENSG00000185164	NOMO2
chr12-48894935	rs61941142	chr12_48939655_48941188:-	circAC073610.3,ARF3	AC073610.3,ARF3	ENSG00000156709	AIFM1	ENSG00000185164	NOMO2
chr12-48897234	rs4237853	chr12_48939655_48941188:-	circAC073610.3,ARF3	AC073610.3,ARF3	ENSG00000156709	AIFM1	ENSG00000185164	NOMO2
chr12-48897372	rs4018508	chr12_48939655_48941188:-	circAC073610.3,ARF3	AC073610.3,ARF3	ENSG00000156709	AIFM1	ENSG00000185164	NOMO2
chr12-48898745	rs2368701	chr12_48939655_48941188:-	circAC073610.3,ARF3	AC073610.3,ARF3	ENSG00000156709	AIFM1	ENSG00000185164	NOMO2
chr12-48900317	rs12228521	chr12_48939655_48941188:-	circAC073610.3,ARF3	AC073610.3,ARF3	ENSG00000156709	AIFM1	ENSG00000185164	NOMO2
chr12-48900371	rs12227240	chr12_48939655_48941188:-	circAC073610.3,ARF3	AC073610.3,ARF3	ENSG00000156709	AIFM1	ENSG00000185164	NOMO2
chr12-48902166	rs7489036	chr12_48939655_48941188:-	circAC073610.3,ARF3	AC073610.3,ARF3	ENSG00000156709	AIFM1	ENSG00000185164	NOMO2
chr12-48902273	rs4433614	chr12_48939655_48941188:-	circAC073610.3,ARF3	AC073610.3,ARF3	ENSG00000156709	AIFM1	ENSG00000185164	NOMO2
chr12-48904002	rs1318692	chr12_48939655_48941188:-	circAC073610.3,ARF3	AC073610.3,ARF3	ENSG00000156709	AIFM1	ENSG00000185164	NOMO2
chr12-48904081	rs961320	chr12_48939655_48941188:-	circAC073610.3,ARF3	AC073610.3,ARF3	ENSG00000156709	AIFM1	ENSG00000185164	NOMO2
chr12-48904276	rs3809147	chr12_48939655_48941188:-	circAC073610.3,ARF3	AC073610.3,ARF3	ENSG00000156709	AIFM1	ENSG00000185164	NOMO2
chr12-48904720	rs4760665	chr12_48939655_48941188:-	circAC073610.3,ARF3	AC073610.3,ARF3	ENSG00000156709	AIFM1	ENSG00000185164	NOMO2
chr12-48906278	rs11168783	chr12_48939655_48941188:-	circAC073610.3,ARF3	AC073610.3,ARF3	ENSG00000156709	AIFM1	ENSG00000185164	NOMO2
chr12-48907422	rs11168784	chr12_48939655_48941188:-	circAC073610.3,ARF3	AC073610.3,ARF3	ENSG00000156709	AIFM1	ENSG00000185164	NOMO2
chr12-48909300	rs11608916	chr12_48939655_48941188:-	circAC073610.3,ARF3	AC073610.3,ARF3	ENSG00000156709	AIFM1	ENSG00000185164	NOMO2
chr12-48910087	rs11168785	chr12_48939655_48941188:-	circAC073610.3,ARF3	AC073610.3,ARF3	ENSG00000156709	AIFM1	ENSG00000185164	NOMO2
chr12-48910127	rs58023472	chr12_48939655_48941188:-	circAC073610.3,ARF3	AC073610.3,ARF3	ENSG00000156709	AIFM1	ENSG00000185164	NOMO2
chr12-48911346	rs4760661	chr12_48939655_48941188:-	circAC073610.3,ARF3	AC073610.3,ARF3	ENSG00000156709	AIFM1	ENSG00000185164	NOMO2
chr12-48913742	rs10783292	chr12_48939655_48941188:-	circAC073610.3,ARF3	AC073610.3,ARF3	ENSG00000156709	AIFM1	ENSG00000185164	NOMO2
chr12-48914501	rs10747556	chr12_48939655_48941188:-	circAC073610.3,ARF3	AC073610.3,ARF3	ENSG00000156709	AIFM1	ENSG00000185164	NOMO2
chr12-48916941	rs10875891	chr12_48939655_48941188:-	circAC073610.3,ARF3	AC073610.3,ARF3	ENSG00000156709	AIFM1	ENSG00000185164	NOMO2
chr12-48916942	rs10875892	chr12_48939655_48941188:-	circAC073610.3,ARF3	AC073610.3,ARF3	ENSG00000156709	AIFM1	ENSG00000185164	NOMO2
chr12-48917347	rs11610459	chr12_48939655_48941188:-	circAC073610.3,ARF3	AC073610.3,ARF3	ENSG00000156709	AIFM1	ENSG00000185164	NOMO2
chr12-48917379	rs11610497	chr12_48939655_48941188:-	circAC073610.3,ARF3	AC073610.3,ARF3	ENSG00000156709	AIFM1	ENSG00000185164	NOMO2
chr12-48917745	rs11168790	chr12_48939655_48941188:-	circAC073610.3,ARF3	AC073610.3,ARF3	ENSG00000156709	AIFM1	ENSG00000185164	NOMO2
chr12-48918649	rs10783294	chr12_48939655_48941188:-	circAC073610.3,ARF3	AC073610.3,ARF3	ENSG00000156709	AIFM1	ENSG00000185164	NOMO2
chr12-48918810	rs10875893	chr12_48939655_48941188:-	circAC073610.3,ARF3	AC073610.3,ARF3	ENSG00000156709	AIFM1	ENSG00000185164	NOMO2
chr12-48919168	rs10783295	chr12_48939655_48941188:-	circAC073610.3,ARF3	AC073610.3,ARF3	ENSG00000156709	AIFM1	ENSG00000185164	NOMO2
chr12-48919766	rs7298330	chr12_48939655_48941188:-	circAC073610.3,ARF3	AC073610.3,ARF3	ENSG00000156709	AIFM1	ENSG00000185164	NOMO2
chr12-48920180	rs9796008	chr12_48939655_48941188:-	circAC073610.3,ARF3	AC073610.3,ARF3	ENSG00000156709	AIFM1	ENSG00000185164	NOMO2
chr12-48920240	rs9795742	chr12_48939655_48941188:-	circAC073610.3,ARF3	AC073610.3,ARF3	ENSG00000156709	AIFM1	ENSG00000185164	NOMO2
chr12-48921079	rs10875894	chr12_48939655_48941188:-	circAC073610.3,ARF3	AC073610.3,ARF3	ENSG00000156709	AIFM1	ENSG00000185164	NOMO2
chr12-48921211	rs4760600	chr12_48939655_48941188:-	circAC073610.3,ARF3	AC073610.3,ARF3	ENSG00000156709	AIFM1	ENSG00000185164	NOMO2
chr12-48922959	rs10875895	chr12_48939655_48941188:-	circAC073610.3,ARF3	AC073610.3,ARF3	ENSG00000156709	AIFM1	ENSG00000185164	NOMO2
chr12-48925487	rs2272312	chr12_48939655_48941188:-	circAC073610.3,ARF3	AC073610.3,ARF3	ENSG00000156709	AIFM1	ENSG00000185164	NOMO2
chr12-48925701	rs3825182	chr12_48939655_48941188:-	circAC073610.3,ARF3	AC073610.3,ARF3	ENSG00000156709	AIFM1	ENSG00000185164	NOMO2
chr12-48925916	rs3759146	chr12_48939655_48941188:-	circAC073610.3,ARF3	AC073610.3,ARF3	ENSG00000156709	AIFM1	ENSG00000185164	NOMO2
chr12-48926945	rs11168792	chr12_48939655_48941188:-	circAC073610.3,ARF3	AC073610.3,ARF3	ENSG00000156709	AIFM1	ENSG00000185164	NOMO2
chr12-48928152	rs10875896	chr12_48939655_48941188:-	circAC073610.3,ARF3	AC073610.3,ARF3	ENSG00000156709	AIFM1	ENSG00000185164	NOMO2
chr12-48929455	rs12423542	chr12_48939655_48941188:-	circAC073610.3,ARF3	AC073610.3,ARF3	ENSG00000156709	AIFM1	ENSG00000185164	NOMO2
chr12-48930396	rs4237854	chr12_48939655_48941188:-	circAC073610.3,ARF3	AC073610.3,ARF3	ENSG00000156709	AIFM1	ENSG00000185164	NOMO2
chr12-48931359	rs11168794	chr12_48939655_48941188:-	circAC073610.3,ARF3	AC073610.3,ARF3	ENSG00000156709	AIFM1	ENSG00000185164	NOMO2
chr12-48932057	rs12229275	chr12_48939655_48941188:-	circAC073610.3,ARF3	AC073610.3,ARF3	ENSG00000156709	AIFM1	ENSG00000185164	NOMO2
chr12-48932364	rs61942166	chr12_48939655_48941188:-	circAC073610.3,ARF3	AC073610.3,ARF3	ENSG00000156709	AIFM1	ENSG00000185164	NOMO2
chr12-48932657	rs61942167	chr12_48939655_48941188:-	circAC073610.3,ARF3	AC073610.3,ARF3	ENSG00000156709	AIFM1	ENSG00000185164	NOMO2
chr12-48932904	rs1830192	chr12_48939655_48941188:-	circAC073610.3,ARF3	AC073610.3,ARF3	ENSG00000156709	AIFM1	ENSG00000185164	NOMO2
chr12-48932991	rs1818996	chr12_48939655_48941188:-	circAC073610.3,ARF3	AC073610.3,ARF3	ENSG00000156709	AIFM1	ENSG00000185164	NOMO2
chr12-48933675	rs11168795	chr12_48939655_48941188:-	circAC073610.3,ARF3	AC073610.3,ARF3	ENSG00000156709	AIFM1	ENSG00000185164	NOMO2
chr12-48933911	rs10875897	chr12_48939655_48941188:-	circAC073610.3,ARF3	AC073610.3,ARF3	ENSG00000156709	AIFM1	ENSG00000185164	NOMO2
chr12-48935912	rs2272311	chr12_48939655_48941188:-	circAC073610.3,ARF3	AC073610.3,ARF3	ENSG00000156709	AIFM1	ENSG00000185164	NOMO2
chr12-48938229	rs2073480	chr12_48939655_48941188:-	circAC073610.3,ARF3	AC073610.3,ARF3	ENSG00000156709	AIFM1	ENSG00000185164	NOMO2
chr12-48938309	rs1054376	chr12_48939655_48941188:-	circAC073610.3,ARF3	AC073610.3,ARF3	ENSG00000156709	AIFM1	ENSG00000185164	NOMO2
chr12-48938583	rs4760666	chr12_48939655_48941188:-	circAC073610.3,ARF3	AC073610.3,ARF3	ENSG00000156709	AIFM1	ENSG00000185164	NOMO2
chr12-48941728	rs2131713	chr12_48939655_48941188:-	circAC073610.3,ARF3	AC073610.3,ARF3	ENSG00000156709	AIFM1	ENSG00000185164	NOMO2
chr12-48942619	rs2030900	chr12_48939655_48941188:-	circAC073610.3,ARF3	AC073610.3,ARF3	ENSG00000156709	AIFM1	ENSG00000185164	NOMO2
chr12-48943006	rs4018510	chr12_48939655_48941188:-	circAC073610.3,ARF3	AC073610.3,ARF3	ENSG00000156709	AIFM1	ENSG00000185164	NOMO2
chr12-48943504	rs4760667	chr12_48939655_48941188:-	circAC073610.3,ARF3	AC073610.3,ARF3	ENSG00000156709	AIFM1	ENSG00000185164	NOMO2
chr12-48943754	rs10875898	chr12_48939655_48941188:-	circAC073610.3,ARF3	AC073610.3,ARF3	ENSG00000156709	AIFM1	ENSG00000185164	NOMO2
chr12-48945058	rs11168797	chr12_48939655_48941188:-	circAC073610.3,ARF3	AC073610.3,ARF3	ENSG00000156709	AIFM1	ENSG00000185164	NOMO2
chr12-48947227	rs4760668	chr12_48939655_48941188:-	circAC073610.3,ARF3	AC073610.3,ARF3	ENSG00000156709	AIFM1	ENSG00000185164	NOMO2
chr12-48947603	rs2641450	chr12_48939655_48941188:-	circAC073610.3,ARF3	AC073610.3,ARF3	ENSG00000156709	AIFM1	ENSG00000185164	NOMO2
chr12-48948110	rs61942169	chr12_48939655_48941188:-	circAC073610.3,ARF3	AC073610.3,ARF3	ENSG00000156709	AIFM1	ENSG00000185164	NOMO2
chr12-48950618	rs10747558	chr12_48939655_48941188:-	circAC073610.3,ARF3	AC073610.3,ARF3	ENSG00000156709	AIFM1	ENSG00000185164	NOMO2
chr12-48950897	rs10875900	chr12_48939655_48941188:-	circAC073610.3,ARF3	AC073610.3,ARF3	ENSG00000156709	AIFM1	ENSG00000185164	NOMO2
chr12-48951354	rs11168798	chr12_48939655_48941188:-	circAC073610.3,ARF3	AC073610.3,ARF3	ENSG00000156709	AIFM1	ENSG00000185164	NOMO2
chr12-48951874	rs11168800	chr12_48939655_48941188:-	circAC073610.3,ARF3	AC073610.3,ARF3	ENSG00000156709	AIFM1	ENSG00000185164	NOMO2
chr12-48952275	rs11168803	chr12_48939655_48941188:-	circAC073610.3,ARF3	AC073610.3,ARF3	ENSG00000156709	AIFM1	ENSG00000185164	NOMO2
chr12-48953798	rs4526804	chr12_48939655_48941188:-	circAC073610.3,ARF3	AC073610.3,ARF3	ENSG00000156709	AIFM1	ENSG00000185164	NOMO2
chr12-48954148	rs9783477	chr12_48939655_48941188:-	circAC073610.3,ARF3	AC073610.3,ARF3	ENSG00000156709	AIFM1	ENSG00000185164	NOMO2
chr12-48955594	rs9783452	chr12_48939655_48941188:-	circAC073610.3,ARF3	AC073610.3,ARF3	ENSG00000156709	AIFM1	ENSG00000185164	NOMO2
chr12-48957710	rs2070940	chr12_48939655_48941188:-	circAC073610.3,ARF3	AC073610.3,ARF3	ENSG00000156709	AIFM1	ENSG00000185164	NOMO2
chr12-48959355	rs9645813	chr12_48939655_48941188:-	circAC073610.3,ARF3	AC073610.3,ARF3	ENSG00000156709	AIFM1	ENSG00000185164	NOMO2
chr12-48959818	rs61942207	chr12_48939655_48941188:-	circAC073610.3,ARF3	AC073610.3,ARF3	ENSG00000156709	AIFM1	ENSG00000185164	NOMO2
chr12-48959837	rs59087236	chr12_48939655_48941188:-	circAC073610.3,ARF3	AC073610.3,ARF3	ENSG00000156709	AIFM1	ENSG00000185164	NOMO2
chr12-48960344	rs10875901	chr12_48939655_48941188:-	circAC073610.3,ARF3	AC073610.3,ARF3	ENSG00000156709	AIFM1	ENSG00000185164	NOMO2
chr12-48960701	rs4760664	chr12_48939655_48941188:-	circAC073610.3,ARF3	AC073610.3,ARF3	ENSG00000156709	AIFM1	ENSG00000185164	NOMO2
chr12-48961509	rs10875902	chr12_48939655_48941188:-	circAC073610.3,ARF3	AC073610.3,ARF3	ENSG00000156709	AIFM1	ENSG00000185164	NOMO2
chr12-48964104	rs10875903	chr12_48939655_48941188:-	circAC073610.3,ARF3	AC073610.3,ARF3	ENSG00000156709	AIFM1	ENSG00000185164	NOMO2
chr12-48964106	rs10875904	chr12_48939655_48941188:-	circAC073610.3,ARF3	AC073610.3,ARF3	ENSG00000156709	AIFM1	ENSG00000185164	NOMO2
chr12-48965097	rs3782353	chr12_48939655_48941188:-	circAC073610.3,ARF3	AC073610.3,ARF3	ENSG00000156709	AIFM1	ENSG00000185164	NOMO2
chr12-48965804	rs3741627	chr12_48939655_48941188:-	circAC073610.3,ARF3	AC073610.3,ARF3	ENSG00000156709	AIFM1	ENSG00000185164	NOMO2
chr12-48966206	rs1051886	chr12_48939655_48941188:-	circAC073610.3,ARF3	AC073610.3,ARF3	ENSG00000156709	AIFM1	ENSG00000185164	NOMO2
chr12-48967580	rs11168812	chr12_48939655_48941188:-	circAC073610.3,ARF3	AC073610.3,ARF3	ENSG00000156709	AIFM1	ENSG00000185164	NOMO2
chr12-48974850	rs4760663	chr12_48939655_48941188:-	circAC073610.3,ARF3	AC073610.3,ARF3	ENSG00000156709	AIFM1	ENSG00000185164	NOMO2
chr12-48977074	rs4760662	chr12_48939655_48941188:-	circAC073610.3,ARF3	AC073610.3,ARF3	ENSG00000156709	AIFM1	ENSG00000185164	NOMO2
chr12-70701966	rs117462584	chr12_70684127_70701323:-	circPTPRR	PTPRR	ENSG00000100813	ACIN1	ENSG00000111700	SLCO1B3
chr12-70748759	rs140468259	chr12_70684127_70701323:-	circPTPRR	PTPRR	ENSG00000100813	ACIN1	ENSG00000111700	SLCO1B3
chr12-70754355	rs143322105	chr12_70684127_70701323:-	circPTPRR	PTPRR	ENSG00000100813	ACIN1	ENSG00000111700	SLCO1B3
chr6-131142615	rs141913255	chr6_130955105_130956499:-	circEPB41L2	EPB41L2	ENSG00000156709	AIFM1	ENSG00000126698	DNAJC8
chr6-18059611	rs181915567	chr6_18236452_18258405:-	circDEK	DEK	ENSG00000100813	ACIN1	ENSG00000074266	EED
chr6-18059611	rs181915567	chr6_18236452_18258405:-	circDEK	DEK	ENSG00000156709	AIFM1	ENSG00000074266	EED
chr6-18059611	rs181915567	chr6_18236452_18258405:-	circDEK	DEK	ENSG00000183684	ALYREF	ENSG00000074266	EED
chr6-18060671	rs4292515	chr6_18236452_18258405:-	circDEK	DEK	ENSG00000100813	ACIN1	ENSG00000074266	EED
chr6-18060671	rs4292515	chr6_18236452_18258405:-	circDEK	DEK	ENSG00000156709	AIFM1	ENSG00000074266	EED
chr6-18060671	rs4292515	chr6_18236452_18258405:-	circDEK	DEK	ENSG00000183684	ALYREF	ENSG00000074266	EED
chr6-18063240	rs12212496	chr6_18236452_18258405:-	circDEK	DEK	ENSG00000100813	ACIN1	ENSG00000074266	EED
chr6-18063240	rs12212496	chr6_18236452_18258405:-	circDEK	DEK	ENSG00000156709	AIFM1	ENSG00000074266	EED
chr6-18063240	rs12212496	chr6_18236452_18258405:-	circDEK	DEK	ENSG00000183684	ALYREF	ENSG00000074266	EED
chr6-18063750	rs150032095	chr6_18236452_18258405:-	circDEK	DEK	ENSG00000100813	ACIN1	ENSG00000074266	EED
chr6-18063750	rs150032095	chr6_18236452_18258405:-	circDEK	DEK	ENSG00000156709	AIFM1	ENSG00000074266	EED
chr6-18063750	rs150032095	chr6_18236452_18258405:-	circDEK	DEK	ENSG00000183684	ALYREF	ENSG00000074266	EED
chr6-18065335	rs116263689	chr6_18236452_18258405:-	circDEK	DEK	ENSG00000100813	ACIN1	ENSG00000074266	EED
chr6-18065335	rs116263689	chr6_18236452_18258405:-	circDEK	DEK	ENSG00000156709	AIFM1	ENSG00000074266	EED
chr6-18065335	rs116263689	chr6_18236452_18258405:-	circDEK	DEK	ENSG00000183684	ALYREF	ENSG00000074266	EED
chr6-18070598	rs73377247	chr6_18236452_18258405:-	circDEK	DEK	ENSG00000100813	ACIN1	ENSG00000074266	EED
chr6-18070598	rs73377247	chr6_18236452_18258405:-	circDEK	DEK	ENSG00000156709	AIFM1	ENSG00000074266	EED
chr6-18070598	rs73377247	chr6_18236452_18258405:-	circDEK	DEK	ENSG00000183684	ALYREF	ENSG00000074266	EED
chr6-18071614	rs12213058	chr6_18236452_18258405:-	circDEK	DEK	ENSG00000100813	ACIN1	ENSG00000074266	EED
chr6-18071614	rs12213058	chr6_18236452_18258405:-	circDEK	DEK	ENSG00000156709	AIFM1	ENSG00000074266	EED
chr6-18071614	rs12213058	chr6_18236452_18258405:-	circDEK	DEK	ENSG00000183684	ALYREF	ENSG00000074266	EED
chr6-18073289	rs4552733	chr6_18236452_18258405:-	circDEK	DEK	ENSG00000100813	ACIN1	ENSG00000074266	EED
chr6-18073289	rs4552733	chr6_18236452_18258405:-	circDEK	DEK	ENSG00000156709	AIFM1	ENSG00000074266	EED
chr6-18073289	rs4552733	chr6_18236452_18258405:-	circDEK	DEK	ENSG00000183684	ALYREF	ENSG00000074266	EED
chr6-18073860	rs12196196	chr6_18236452_18258405:-	circDEK	DEK	ENSG00000100813	ACIN1	ENSG00000074266	EED
chr6-18073860	rs12196196	chr6_18236452_18258405:-	circDEK	DEK	ENSG00000156709	AIFM1	ENSG00000074266	EED
chr6-18073860	rs12196196	chr6_18236452_18258405:-	circDEK	DEK	ENSG00000183684	ALYREF	ENSG00000074266	EED
chr6-18078535	rs12200845	chr6_18236452_18258405:-	circDEK	DEK	ENSG00000100813	ACIN1	ENSG00000074266	EED
chr6-18078535	rs12200845	chr6_18236452_18258405:-	circDEK	DEK	ENSG00000156709	AIFM1	ENSG00000074266	EED
chr6-18078535	rs12200845	chr6_18236452_18258405:-	circDEK	DEK	ENSG00000183684	ALYREF	ENSG00000074266	EED
chr6-18086466	rs115697010	chr6_18236452_18258405:-	circDEK	DEK	ENSG00000100813	ACIN1	ENSG00000074266	EED
chr6-18086466	rs115697010	chr6_18236452_18258405:-	circDEK	DEK	ENSG00000156709	AIFM1	ENSG00000074266	EED
chr6-18086466	rs115697010	chr6_18236452_18258405:-	circDEK	DEK	ENSG00000183684	ALYREF	ENSG00000074266	EED
chr6-18087656	rs145821467	chr6_18236452_18258405:-	circDEK	DEK	ENSG00000100813	ACIN1	ENSG00000074266	EED
chr6-18087656	rs145821467	chr6_18236452_18258405:-	circDEK	DEK	ENSG00000156709	AIFM1	ENSG00000074266	EED
chr6-18087656	rs145821467	chr6_18236452_18258405:-	circDEK	DEK	ENSG00000183684	ALYREF	ENSG00000074266	EED
chr6-18089201	rs7754358	chr6_18236452_18258405:-	circDEK	DEK	ENSG00000100813	ACIN1	ENSG00000074266	EED
chr6-18089201	rs7754358	chr6_18236452_18258405:-	circDEK	DEK	ENSG00000156709	AIFM1	ENSG00000074266	EED
chr6-18089201	rs7754358	chr6_18236452_18258405:-	circDEK	DEK	ENSG00000183684	ALYREF	ENSG00000074266	EED
chr6-18059611	rs181915567	chr6_18236452_18258405:-	circDEK	DEK	ENSG00000100813	ACIN1	ENSG00000088448	ANKRD10
chr6-18059611	rs181915567	chr6_18236452_18258405:-	circDEK	DEK	ENSG00000156709	AIFM1	ENSG00000088448	ANKRD10
chr6-18059611	rs181915567	chr6_18236452_18258405:-	circDEK	DEK	ENSG00000183684	ALYREF	ENSG00000088448	ANKRD10
chr6-18060671	rs4292515	chr6_18236452_18258405:-	circDEK	DEK	ENSG00000100813	ACIN1	ENSG00000088448	ANKRD10
chr6-18060671	rs4292515	chr6_18236452_18258405:-	circDEK	DEK	ENSG00000156709	AIFM1	ENSG00000088448	ANKRD10
chr6-18060671	rs4292515	chr6_18236452_18258405:-	circDEK	DEK	ENSG00000183684	ALYREF	ENSG00000088448	ANKRD10
chr6-18063240	rs12212496	chr6_18236452_18258405:-	circDEK	DEK	ENSG00000100813	ACIN1	ENSG00000088448	ANKRD10
chr6-18063240	rs12212496	chr6_18236452_18258405:-	circDEK	DEK	ENSG00000156709	AIFM1	ENSG00000088448	ANKRD10
[truncated: 239 more rows]
